# Supplementary material for: LncRNA and mRNA expression profiles reveal the potential roles of lncRNA contributing to regulating dural penetration in clival chordoma
Source: publisher site journal article supplement (doi:10.18632/aging.103294), 2020-06-13
Supplement: Supplementary file [file aging-v12i11-103294-supplementary-material-SD1.pdf]

## SUPPLEMENTARY FIGURE

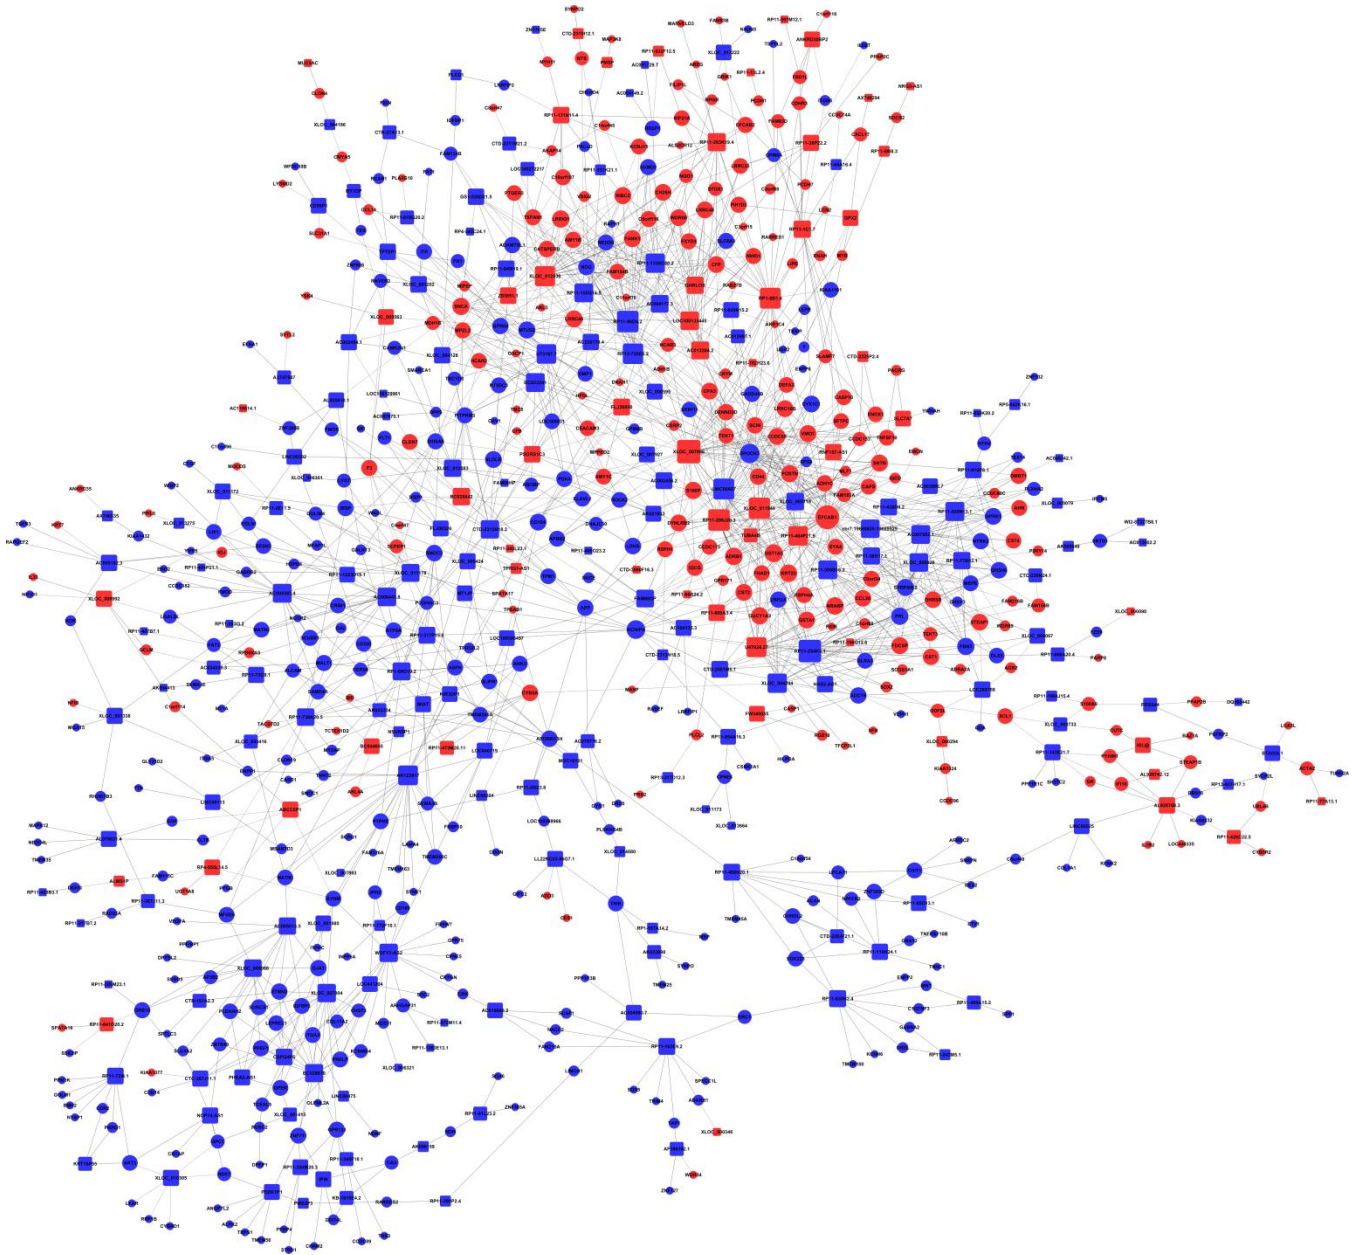

**Supplementary Figure 1. lncRNA-mRNA co-expression network in no dural penetration and serious dural penetration chordoma samples.** Square: lncRNA, dot: mRNA, red: up-regulated, blue: down-regulated. Solid line represents positive correlation, and dash line represents negative correlation.
