# Supplementary material for: LncRNA and mRNA expression profiles reveal the potential roles of lncRNA contributing to regulating dural penetration in clival chordoma
Source: Aging (Albany NY). 2020 Jun 13;12(11):10809–26. doi: 10.18632/aging.103294 (PMC7346080; doi:10.18632/aging.103294)
Supplement: Supplementary Table 1 [file aging-12-103294-s009..xls]

## Sheet: 987 up-regulated lncRNAs
Table S1. LncRNAs differentially expressed between No-DP and Serious-DP
Number	ProbeName	P-value	FDR	Fold Change	seqname	GeneSymbol	Source	RNAlength	Chrom	Strand	txStart	txEnd	Sequence	Relationship
1	ASHGA5P032938	6.53598e-05	0.000873733	216.842	uc002gwy.3	BC044655	UCSC_knowngene	2836	chr17	+	20340136	20350557	CTTGGGTCTTCTCTGTATGATTCCCTGATGGAGATATTTACATGAGTTGAATTTTACTTT	intergenic
2	ASHGA5P050815	0.000106709	0.00127178	111.865	ENST00000490341	TUBA4B	GENCODE	1380	chr2	+	220117964	220136910	AAGATAGGGGGGATGAATACTAGGGGAATACTGTGTGTCTGTCCTACATAAAGTGCTGTG	intronic antisense
3	ASHGA5P023431	0.00211869	0.01195	95.4575	ENST00000580780	NOS2P1	pseudogene	1647	chr17	-	25978359	25992738	TCAGCTCAAGTGCTATCACGAAGATATCTTTGGTGCTGTATTTCCCTACAAGCAGACAAG
4	ASHGA5P020952	0.00170395	0.0101261	67.2427	ENST00000522486	CTA-392C11.1	GENCODE	505	chr8	-	40156593	40200921	ATCATCTTCTGGTCAGTGGCCCGGACAATGCTTTTGATGAACAGATGATGAGTGACAATG	intergenic
5	ASHGA5P027786	0.00570387	0.0255747	65.0031	ENST00000537269	U47924.27	GENCODE	350	chr12	+	7072408	7073610	CTTGGGAGCATGAAATAAATAAAGTGTGAAGGGGAACATGAGGAAGACTGATCCAAGTCA	intergenic
6	ASHGA5P054658	0.000159582	0.00170735	63.4706	uc009ycs.2	MUC5AC	UCSC_knowngene	1274	chr11	+	1220624	1222366	TGTTCCTCTCCAGAGTCGACCTGTGCTGTGTACCATAGGAGCCTGATCATCCAGCAGCAG	intergenic
7	ASHGA5P039455	0.000109093	0.00129188	47.9163	ENST00000567197	RP11-44F21.5	GENCODE	571	chr4	-	76007134	76007705	TATGTGTCTATCTTTCCTGCTGTTCATATTATTGAGTTAGCCAAATAAATTCAATTTTTT	intergenic
8	ASHGA5P026109	2.95861e-05	0.000469001	46.4825	uc001lsz.3	MUC5AC	UCSC_knowngene	3684	chr11	+	1213089	1222366	ATGGGACTTCTCCTACCAATGCTCTGTATCCTTCCCTGTCTACTTCCATGGTATCCGCCT	intergenic
9	ASHGA5P045399	1.2074e-06	4.5863e-05	38.0563	TCONS_00001956	XLOC_000090	LincRNAs identified by Cabili et al	500	chr1	+	22583494	22584433	GCCAGCTCCTCAGAGCTCTGTAGGTTACCCCGTGAGACCTTCTCCCTGCACGCCTTTTTT	intergenic
10	ASHGA5P035144	3.35632e-05	0.000520592	36.2708	uc002sti.1	AK128525	UCSC_knowngene	3599	chr2	-	89156675	89160274	CAGATAGGAGTATCTTCATAGCATGTTTTTCCCTGCTTATTTTCCAGTGATCACATTATT	intergenic
11	ASHGA5P044223	0.0023337	0.0128798	32.1496	ENST00000521030	CTA-392C11.1	GENCODE	663	chr8	-	40190691	40200882	TCAGCCACAGCGATTGATCTGGATTTTCTGTAAAATTCCCTGATTTTTACATATTGCCAA	intergenic
12	ASHGA5P037926	2.16698e-05	0.000372492	31.4526	ENST00000442126	RP4-539M6.14	GENCODE	502	chr22	+	30887788	30888791	AACAGTTTTGGGGCTGAAACACATGTAAATCTCTTGAGAAGCTGGACCAGAAAGGACGTG	natural antisense
13	ASHGA5P017354	0.00351859	0.0176093	25.899	ENST00000440540	RP11-275I14.4	GENCODE	535	chr1	+	226335703	226342772	GCCACTATCAGGAATTTAAAACAAGATTTGGAATTATGACATCTGGACAAACACATATGC	natural antisense
14	ASHGA5P036329	0.000460229	0.00384351	25.7669	ENST00000449346	AC013264.2	GENCODE	455	chr2	+	198062714	198063997	GCCTTCACAGTTTAGGTTTTGGTAAGAAGAAAGCTTATCTTCATGTCATGAGAAAGAAAA	intronic antisense
15	ASHGA5P041839	2.22089e-05	0.000379924	25.7271	ENST00000562471	RP11-7K24.3	GENCODE	2022	chr6	-	42059975	42061997	GAACCCAGTCACTTTGCTGTTTTTCTGCCCACAAGTTTCTCTAATAAATCTTATTCTATG	intergenic
16	ASHGA5P058484	0.00143555	0.00892287	23.7015	uc004afh.2	LOC440896	UCSC_knowngene	1641	chr9	-	69174213	69192879	GATATCGCAGCTGAGTGCCACGTGCTGACGTCACTAAGATCAATACAGCAAACTCTGAAA	intergenic
17	ASHGA5P047144	4e-13	0	23.0511	ENST00000449984	RP11-298J20.3	GENCODE	830	chr10	-	126633772	126635001	ATAAACCTACATGTACTATAACACCACCTTGTAGTCCAAGTATTCATAGTACACTACTCC	intronic antisense
18	ASHGA5P050970	0.00350487	0.0175473	22.2056	NR_049773	KIAA1324	RefSeq	6964	chr1	+	109656584	109749403	TCTCTTTCAGAGGACTCCTGATGGATTTGACTCAGTGCCGCTGAAGACATCCTCAGGAGG	exon sense-overlapping
19	ASHGA5P048627	0.000149248	0.00161815	20.6811	uc001zjx.1	BC039545	UCSC_knowngene	641	chr15	+	38276966	38332682	CATTCTCTAGGAATCACAGTCCCATTCTTCTGCAGGCAAACGGAGTCGCCATATGACCCA	intergenic
20	ASHGA5P052240	8.0384e-05	0.00103304	20.6025	NR_046243	LOC642366	RefSeq	6699	chr5	-	50668570	50679166	CCTCTGGGCTTTCCTCGAAATGAATAAAATTGTGGAAATGAATGAATGAGAATATCACTT	natural antisense
21	ASHGA5P035146	0.00033766	0.00300708	19.9822	ENST00000430694	IGKJ5	GENCODE	1209	chr2	-	89156708	89165653	TATATAGAGAGAAAGAACCACAAACTTGAAGATGGATATCAGCTACAGACTTTCCTGAGT	intergenic
22	ASHGA5P036097	1.58747e-05	0.000299633	18.8166	ENST00000449954	AL078621.3	GENCODE	745	chr2	+	114270039	114273062	TCTCCGGCGATTTTCATACCTGCATACTCTGATCACTACTCTGTTAAACAGTCAAGGAGG	intergenic
23	ASHGA5P046755	9.83e-05	0.00119686	18.5759	uc022cjh.1	IGL@	UCSC_knowngene	88	chrY	-	13629636	13629724	CCCTGTCTGCATCTGTAGGAGACAGAGTCACCATCACTTGCCGGGCGAGTCAGGGCATTA	intergenic
24	ASHGA5P017582	1.83352e-05	0.000332057	18.5651	ENST00000443364	RP11-48O20.4	GENCODE	804	chr1	+	159931007	159946902	CACCCACCTCATTTTTCTAATAAGAGCTTTCAATAAACCTCTCTTTCTTGAAGTTACCTG	intergenic
25	ASHGA5P022945	0.000413634	0.00352868	18.5523	ENST00000566140	CTD-2319I12.1	GENCODE	447	chr17	-	58160926	58165654	TTCAGTCTAGATGAAGAGTTATCTTAAGGATCATCTTTCCCTAAGATCGTCATCCCTTCC	intergenic
26	ASHGA5P031125	1.38875e-07	9.282e-06	18.0484	ENST00000570288	RP11-1437A8.5	GENCODE	2239	chr16	-	33271713	33274156	TAATCACTTAATTTGGTCATCTTCCCTGTCACAATGGGGCACCTGGCGCTATAGACACTT	intergenic
27	ASHGA5P039773	5.42051e-05	0.000753768	17.8965	ENST00000502641	RP11-503N18.4	GENCODE	220	chr4	+	2465523	2465851	AAAGGACAAGAGCCCTACTCCAATATTCTGAGTTTGTGAGAACCCCAGGATTTTACCACC	intron sense-overlapping
28	ASHGA5P029304	0.000101814	0.00123041	17.7079	ENST00000565058	RP11-747H7.3	GENCODE	3040	chr14	-	92223102	92226142	CCCTACTGCCTATTTCTAGGTGCTGTTCCCTTTAATAAGTATATTTTGAACATCATTTGT	intron sense-overlapping
29	ASHGA5P041852	0.00130462	0.00828049	16.7371	ENST00000444038	RP1-8B1.4	GENCODE	453	chr6	-	46064829	46097328	GACATCAGTACTCTTCACCTCCAAACATTTCAGCAACATATCATTAACGATAGTCAAAAA	bidirectional
30	ASHGA5P046410	0.00192938	0.01112	15.8718	TCONS_00001387	XLOC_000701	LincRNAs identified by Cabili et al	857	chr1	-	11371803	11374861	AAGCCATCCTTTAGGCCAAAGAATCCCCACATAACAAATTCATTGTGTGCAATAAAGAAC	intergenic
31	ASHGA5P020902	0.00983505	0.038599	15.4975	NR_024605	EFCAB1	RefSeq	1860	chr8	-	49635952	49647870	GAAAAAATGAAATGAGGAAATGTTTCACATGTTGAAGAACAGCCTTCTCAAACAGCCATC	exon sense-overlapping
32	ASHGA5P032948	1.42206e-05	0.000275221	15.3509	ENST00000584433	RP11-344E13.3	GENCODE	556	chr17	+	20859606	20862034	GAGTGTGTATGTGTTCTGTAAATTTGATTACACTGCGCATTTATTCCGAAATCCATTTCA	intergenic
33	ASHGA5P033380	0.00287502	0.0151855	15.2583	NR_040017	RNF157-AS1	RefSeq	2177	chr17	+	74136636	74150729	GTCAGGAACACCCTTGTTAATAGTTTAGCTGATACTGTTTCTCTAAGGTGGAAGTAAAAA	natural antisense
34	ASHGA5P030441	2.76904e-05	0.000446484	15.1782	ENST00000557883	RP11-1008C21.1	GENCODE	766	chr15	+	38296946	38317219	ATGTAACTGCACATAGAAGCCAGTCCTGAAAAGAAGCAAGCCGGCTGAAGTTATCTGCAA	intergenic
35	ASHGA5P030511	0.00052055	0.00415469	15.0884	uc001zvk.3	HMGN2P46	UCSC_knowngene	942	chr15	+	45803333	45811865	CATCTCTGTATTGTTTAACAAAATATTTCCACATTTGACAATAAAGTCAGTATTTGAAAG	natural antisense
36	ASHGA5P029313	2.76004e-06	8.4208e-05	14.593	TCONS_00010227	XLOC_004693	LincRNAs identified by Cabili et al	375	chr5	-	553526	554002	TTTGTTAGAGATGGGAGGCTGTAGGTTTGTTAGAGATGGGAGGCTGTTAGGTTTGTTAGA	intergenic
37	ASHGA5P036472	0.0161396	0.0560177	13.9005	ENST00000416861	AC009502.4	GENCODE	496	chr2	+	220551708	220579408	GTGAATAGAGAGAGAGGGAACAGGGAAATATCTAGATCTGTGTGCTGATACCACTTTTTT	intergenic
38	ASHGA5P048196	0.00968947	0.0382243	13.701	DA413705		LincRNAs identified by Khalil et al	543	chr3	+	52056668	52057211	AGAGAGACTAGCACTCAAATGAGGAGAGAGAAACTGTAGAGGATTTGAGCTCCAGGGTTT	intergenic
39	ASHGA5P054732	0.0174015	0.0590539	13.5875	NR_038904	LOC100506305	RefSeq	1576	chr11	-	13001080	13011095	TACCAAGAGAGGAAGCTCAAAAAAAACAGAAGCTTCAAACAAACAACCAACCAAAAAAAA	intergenic
40	ASHGA5P055414	2.4627e-05	0.000410461	12.8022	TCONS_00016903	XLOC_007896	LincRNAs identified by Cabili et al	379	chr9	-	139506485	139510295	ATCACAACTTTAAACCCCGTCCGTACTGAAGCCTGCGTCCGAATTTCTTCTGTTTTTGTG	intergenic
41	ASHGA5P034727	0.000789696	0.00567627	12.7068	NR_027257	FLJ26850	RefSeq	1451	chr19	+	50553936	50570052	TTATTTGTTGAGTGCTTAGGACACTGCAGAGAGGCTGAGCTCTGACAAAGCTGTTTAAGG	intergenic
42	ASHGA5P031701	0.000222166	0.00219075	12.5915	uc002ect.3	IGH	UCSC_knowngene	91	chr16	+	31973408	31973499	TTGGTCCAGCCTGGGGGGTCCCTGAGACTCTCCTGTGCAGCCTCTGGATTCACCTTCAGT	intergenic
43	ASHGA5P051158	4.11466e-06	0.000112326	12.3543	ENST00000434081	LINC00163	GENCODE	2155	chr21	-	46409778	46414001	TCGATGGTGCCCTCGACCTGTCCTCCCTCAGCAGCCTGTGGCATCCAGACCAGTTCGTGG	intergenic
44	ASHGA5P041318	0.00645916	0.0280308	12.3507	uc003krz.3	BC044609	UCSC_knowngene	1209	chr5	+	117618268	117620462	TCTGGTCAGAGATGAGAGAGAAAGATTTTTCTGGGTAAAGTTAACAAGGTATATAGGGTG	intergenic
45	ASHGA5P045822	0.000118068	0.0013656	12.3172	ENST00000457003	RP11-62C3.6	GENCODE	333	chr9	+	94967637	94972440	ATTTCTGTGCCTCTTCTACCTTTCATCCCAGAGGTTAACTGGTGCTGTGAATTCTGAAAT	intergenic
46	ASHGA5P047435	0.000202849	0.0020402	12.0723	ENST00000517854	RP11-131N11.4	GENCODE	434	chr10	+	62494099	62501586	TGCTATCTGTTTTCCATTACTTGCCTTCTCTTACCCTGAAATTATGCATCTGGAATGAAG	bidirectional
47	ASHGA5P028028	0.0124656	0.045986	12.0142	ENST00000566418	RP11-686F15.2	GENCODE	429	chr12	+	54148141	54155888	ATAAGGTGGTGCACAATGATGAGAGAGAGGACTTTGAGGGTTTTCTTCCTAGGTGCTCAA	intergenic
48	ASHGA5P031491	0.00901268	0.0361036	11.9376	NR_047572	LOC100128770	RefSeq	3061	chr16	+	3082481	3089133	GGCCATGGGAGGGAGCGTAGACCTATAAACCAGAAATGAACCAATAAAACAGTACAGCAA	natural antisense
49	ASHGA5P031713	0.0023342	0.0128798	11.9335	uc002edk.1	IGH	UCSC_knowngene	88	chr16	+	33013796	33013884	GTGAAGAAGCCTGGGGCCTCAGTGAAGGTCTCCTGCCAGGCTTCTGGATACACCTTCACC	intergenic
50	ASHGA5P017857	0.000639581	0.00487071	11.9286	ENST00000446406	H19	GENCODE	1612	chr11	-	2016445	2019057	GGTGGGCAGGGGTCTGGTGCGGAGAGGGCCCACAGTGGACTTGGTGACGCTGTATGCCCT	intergenic
51	ASHGA5P029906	0.00424788	0.0203782	11.6979	ENST00000558441	RP11-758N13.1	GENCODE	1738	chr15	-	33009470	33011208	GCCTCCCCTGTGAGTGTACAGAGGGGAGTCACGGGAGGAGAATAAAACTAAATGACCGTC	natural antisense
52	ASHGA5P052916	0.000717699	0.00532403	11.6412	NR_038849	LOC100505633	RefSeq	1154	chr1	+	159931013	159948876	GCACTAAATTAGCTTTGTATGTTATTAAATGTGTCTCGTCAATGCTGTTGGCATTGTTTC	intergenic
53	ASHGA5P044786	0.000528044	0.00419555	11.5448	ENST00000520185	RP11-44K6.2	GENCODE	102	chr8	+	39771747	39773240	GGGACTGGATGATTTCAAGGATGTACTTATCAATGGTACAATAAAACCATCTTTTTCAGA	intron sense-overlapping
54	ASHGA5P031703	0.00611574	0.0268823	11.1586	uc002ecv.1	IGH	UCSC_knowngene	88	chr16	+	32070547	32070635	GTGAAGAAGCCTGGGGCCTCAGTGAAGGTCTCCTGCAAGGCTTCTGGATACACCTTCACC	intergenic
55	ASHGA5P049198	1.27206e-05	0.000251446	11.089	TCONS_00023943	XLOC_011259	LincRNAs identified by Cabili et al	346	chr15	+	53375035	53393040	TTCTTGCCCTGGGTCATCCTGCACTCAGTGTTGACTTTGTGGCATCTACTGAAATACTTT	intergenic
56	ASHGA5P042471	0.00374189	0.0184631	11.0626	ENST00000448327	RP11-345L23.1	GENCODE	566	chr6	+	53493177	53496192	CGAAGCTTTTGAAGGTTTAAGGATCACCTATTTATTGACAAAATTGTTTCCGTGGCTTAA	intergenic
57	ASHGA5P031134	7.98989e-06	0.000180811	10.9859	uc021thj.1	IGH	UCSC_knowngene	136	chr16	-	33654256	33654392	TTCTCCTGCCAGGCTTCTGGATACACCTTCACCTACTGCTACTTGCACTGGGTGCGATGG	intergenic
58	ASHGA5P028806	0.0094725	0.0375512	10.9207	ENST00000521507	TPT1-AS1	GENCODE	665	chr13	+	45918438	45953409	CTCATGAAGCCACTTGGAATCCCTCTCTGCTTTGCCTGGCTCATTCCATGTCAATTTCAG	intergenic
59	ASHGA5P026635	7.207e-06	0.000168688	10.9061	ENST00000524441	RP11-632K5.2	GENCODE	639	chr11	+	74120104	74127424	CATCATACAGCACCCACAGGAACTTCAAGAGACTGGAGTTAATAAAGAGATTAAAGAGAT	intergenic
60	ASHGA5P031570	0.000350485	0.00309568	10.7242	ENST00000565118	ABCC6P1	GENCODE	796	chr16	+	18582483	18584844	GGCCACATTAGGATGAACCTTTTAAAAAGTTATGCATTTATTTTTATGTTCCCCCACTGG	intergenic
61	ASHGA5P034639	0.000561943	0.00441887	10.6942	ENST00000483806	CEACAMP3	pseudogene	638	chr19	+	42106089	42111576	TACACCCTACAAGTCATAAAAACAGATCTTGTGAATGAAGAAGTAACTGGCCAGTTTCAC
62	ASHGA5P058063	0.00118378	0.00769426	10.6122	TCONS_00026129	XLOC_012538	LincRNAs identified by Cabili et al	202	chr17	-	58160929	58165550	CAGGCAGAAGAGTTATCTTAAGGATCATCTTTCCCTAAGATCGTCATCCCTTCCTGGAGT	intergenic
63	ASHGA5P031710	0.0043961	0.0209652	10.5974	uc021thc.1	IGH	UCSC_knowngene	84	chr16	+	32926554	32926638	GGAGGCCTTGGTACAGCCTGGGGGGTCCCTTAGACTCTCCTGTGCAGCCTCTGGATTCAC	intergenic
64	ASHGA5P033848	0.000521175	0.00415626	10.5622	ENST00000584252	RP11-15F12.1	GENCODE	659	chr18	+	46550072	46574844	CGATGTGGTAATGTCGCTGTTAAAACGCACTTCTCATTGTTAGAAATAAAAATGACTCAA	intronic antisense
65	ASHGA5P015469	0.0124045	0.0458261	10.3708	ENST00000577817	AC006050.3	GENCODE	1235	chr17	-	28894777	28898799	CTTCAGCAAGACAGAGGAACTGAAACGCGAGGTGGCTACCAACAGCGAACTGGTCCAGAG	intergenic
66	ASHGA5P028007	3.11751e-05	0.000489997	9.90186	ENST00000548970	OR7E5P	pseudogene	982	chr12	+	52501061	52502043	ACCTCCATGCTCAACCCCTTTATCTACAGCCTGGGAAACAGGGATATTAAAAGTGTCTTG
67	ASHGA5P044793	0.00405966	0.0196644	9.85523	TCONS_00001093	XLOC_000340	LincRNAs identified by Cabili et al	216	chr1	+	110626115	110627730	TTATAAACCTGCAGTCTAACAGAGCCTTCAAGGTTATGGCCATGAGAAATGTGAGTGGAG	intergenic
68	ASHGA5P028262	0.000255341	0.00241855	9.75963	ENST00000547282	RP11-689B22.2	GENCODE	303	chr12	+	109029624	109034693	AATGAAGCCCAAGAAAAATACTCCAAGTTGCCTTCCAAGATTGAAGCAATGATATCTGAG	intergenic
69	ASHGA5P038000	0.0169727	0.058024	9.70041	NR_039988	LOC100130899	RefSeq	4246	chr22	+	40428335	40432581	CCCACAACCTTTCTGGATTGATAGTTTGTGGTGAAATAAACAATTTTAGTTTGTTTGGAG	intergenic
70	ASHGA5P034204	0.00262401	0.0141375	9.62933	TCONS_00016513	XLOC_007896	LincRNAs identified by Cabili et al	371	chr9	-	139506485	139508248	TCCGTACTGAAGCCTGCGTCCGAATTTCTTCTGTTTTTGTGGCGGAAGGATAAATATTCC	intergenic
71	ASHGA5P021269	3.25829e-05	0.000508798	9.48562	ENST00000529082	RP11-428C19.5	GENCODE	422	chr11	+	19321548	19329905	TTAGATAACTGTGCCTGATCCCTATGGCCAGGAAGGAAGGAGCTGAAGAATTCACATTTG	intergenic
72	ASHGA5P031133	0.000514736	0.00412776	9.29388	uc010vga.2	IGH	UCSC_knowngene	91	chr16	-	33647451	33647542	TGGTACAGCCTGGGGGGTCCCTGAGACTGTCCTGTCCAGACTCTGGATTCACCTTCAGTA	intergenic
73	ASHGA5P018229	0.00252325	0.0137244	9.15001	ENST00000450920	SRGAP3-AS2	GENCODE	1189	chr3	+	9234218	9236137	ACCAGTCCAGGTGGCGAGGAGTCCATGTCAGCTGCCGTCATCCACACCACAGATCAGACA	intronic antisense
74	ASHGA5P047729	0.000186002	0.00193415	9.09826	NR_026941	CASC2	RefSeq	2407	chr10	+	119806331	119859647	GTTTGGCAGTGTTCTAACATGGCCATCCTGTTCTCCTTTAGCAACTTATTAAATGTATTT	bidirectional
75	ASHGA5P028121	3.3894e-09	6.1e-07	9.05162	ENST00000536914	IFNG-AS1	GENCODE	494	chr12	+	68383308	68628466	CATGTCTTCCATGGGTTGTGCCCTGAATCAATGCATTTATTAATTCTTTCAAAATGCAAA	intronic antisense
76	ASHGA5P044824	5.27832e-06	0.000135802	9.02409	ENST00000518552	RP11-318K15.2	GENCODE	651	chr8	+	56806153	56808276	CAATGCTTTGTCAAATACCAGTCTTGGGACATTAGATGAAGCTCCTTCATCTAATGTTTT	intron sense-overlapping
77	ASHGA5P034213	0.00355332	0.0177488	9.01361	TCONS_00016514	XLOC_007896	LincRNAs identified by Cabili et al	703	chr9	-	139506545	139507780	GCTTCTCGGGAATGGAATCACACACGGACTGTGGCGTACACATCACAACTTTAAACCCCG	intergenic
78	ASHGA5P029805	0.000209585	0.00208572	9.01296	TCONS_00008144	XLOC_003595	LincRNAs identified by Cabili et al	228	chr4	+	84010099	84010394	GGGGTCATTGGTACCTGGATTTTTCACCTTGAACAACTAAGTGATATCATTGGACTTGTT	intergenic
79	ASHGA5P035993	0.000408118	0.00349311	8.9634	uc002stn.1	IGVK-A2	UCSC_knowngene	301	chr2	+	89986779	89987080	TCTAGTCAGAGCCTCCTGCATAGTGATGGAAAGACCTATTTGTATTGGTACCTGCAGAAG	intergenic
80	ASHGA5P040991	0.0113702	0.042972	8.87831	ENST00000416930	RP11-1C1.7	GENCODE	483	chr5	+	10479482	10482421	TGCTACACTTTCTTATCATAGTTTACCGCAATTAAAAATCAAAACAAAACAAAACGAAAA	intergenic
81	ASHGA5P035378	0.00037084	0.00324102	8.84951	ENST00000442666	AC005042.4	GENCODE	825	chr2	-	159535167	159591330	TGGACCCCTTACTGTGTTAACTGCTAATCAGCCTTCTGTAAAAATGATATTGCAAATTCA	intronic antisense
82	ASHGA5P031714	0.000225607	0.00221521	8.69399	uc021thd.1	IGH	UCSC_knowngene	138	chr16	+	33020652	33020790	ACTGTCCTGTCCAGCCTCTGGATTCACCTTCAGTAACCACTACATGAGCTGGGTCCGCCA	intergenic
83	ASHGA5P025854	8.59227e-07	3.571e-05	8.648	NR_039977	LOC100506229	RefSeq	1296	chr4	-	185814153	185820615	TGACACTGAGGAGGACAGCACATTGCACTCTCACCTCCTTTGCAGTTAAGTGTGAAATAG	intergenic
84	ASHGA5P020922	0.0112749	0.0426791	8.5772	ENST00000521989	RP11-150O12.6	GENCODE	470	chr8	-	37373967	37374539	TGATGGAATTGAGCAGATGGGAATGACCTGGAATCTAACACTCTACAATTCAGACACACC	intergenic
85	ASHGA5P027171	6.98344e-07	3.0906e-05	8.57575	uc001rjz.3	DKFZp434C0631	UCSC_knowngene	1540	chr12	-	31264585	31274400	CCTCTAAGTGTTACGCAACTCTAACACTAACCTAAGTATATGTAAAAGATTTAGAAGCTC	intergenic
86	ASHGA5P045227	0.00012556	0.00142569	8.54997	ENST00000433614	RP11-95H8.5	GENCODE	1125	chr9	-	39925025	39926970	CAGTGCCAAGAGTTATAAGAACAACTACTTTATTTCACTCCCATCTCTGTGAATACAAAA	intergenic
87	ASHGA5P056851	0.00405096	0.0196296	8.5342	TCONS_00009862	XLOC_004276	LincRNAs identified by Cabili et al	502	chr5	+	7272907	7277834	TCAGAGAGAGACAGAGGGTGAAAATACCAAGGATAGAGCAAGTCTGACAAACTCACGTTG	intergenic
88	ASHGA5P046558	0.000524991	0.00417898	8.52701	ENST00000447323	RP11-368D24__A.1	GENCODE	382	chrX	+	64808283	64813305	GGTTGAATTGAGTCCTTGCTGTTGCTGAAGCTGTGAGAATAATTCTGTTTAAAAAACTTT	intergenic
89	ASHGA5P031250	0.00234437	0.0129249	8.49543	ENST00000571197	RP11-96D1.11	GENCODE	3177	chr16	-	68259871	68263048	GGGCTTACCCTCACTCTAAAGGTATGTTTAAATAAGTATTCACCTTACTCTAACTTTTCT	exon sense-overlapping
90	ASHGA5P031704	0.00888457	0.0357561	8.4532	uc010vft.2	IGH	UCSC_knowngene	91	chr16	+	32077385	32077476	AGGAGGCTTGGTACAGCCTGGGGGGTCCCTGAGACTCTCCTGTGCAGCCTCTGGATTCAC	intergenic
91	ASHGA5P031104	0.00114652	0.00751617	8.32579	ENST00000567765	CTD-2014E2.6	GENCODE	568	chr16	-	31560463	31564888	TTTGGACTCGGACAGGGTTCTTTGGATTGTAGCTGAATTTTCAATGTTTAGTCAATATGG	intergenic
92	ASHGA5P055773	0.0456989	0.121604	8.31579	ENST00000522845	TPT1-AS1	GENCODE	517	chr13	+	45940521	45952767	TTGGAATCCCTCTCTGCTTTGCCTGGCTCATTCCATGTCAATTTCAGATCTTCACTTCAG	intergenic
93	ASHGA5P031872	0.00126507	0.00809283	8.30376	ENST00000571975	RP11-96D1.10	GENCODE	3022	chr16	+	68258615	68261637	TTGGGCATCATATGGCTAATCACTCAGAGGTCACTAATCACTCTCCCTTTTCTTGTTTTT	exon sense-overlapping
94	ASHGA5P041888	0.00605419	0.0267141	8.28071	ENST00000511849	RP1-240B8.3	GENCODE	675	chr6	-	62340137	62390954	GGTCAACTTTGATTCAAAGATAGTCTTCAGTTACCAAACCTTATCACATGACTGTAAAAC	exon sense-overlapping
95	ASHGA5P039733	3.37296e-08	3.289e-06	8.25937	NR_037867	LOC731424	RefSeq	3390	chr4	-	185764449	185768200	AAATCTATGGCTTCTGCTTCTTGGAGGACCCAGATTATCACAGCTTATCTCATTCCTTTG	intergenic
96	ASHGA5P057583	3.71943e-08	3.495e-06	8.15209	TCONS_00019383	XLOC_009207	LincRNAs identified by Cabili et al	346	chr11	+	72911524	72916328	ACACTTTGGGGCTGGCACCCAGCACTGTGCTATCCTAGGAAGAAACAGCTAAATCCCAAT	intergenic
97	ASHGA5P038199	0.0041561	0.0200194	8.0604	TCONS_00024657	XLOC_011944	LincRNAs identified by Cabili et al	2591	chr16	-	53073298	53078119	AAATTTACCTTGCAAAACAGGACTGTGCATGGTGAGAGCTGCTTGCAATGTCCACACTCA	intergenic
98	ASHGA5P049675	0.00297587	0.0155912	8.00151	TCONS_00020124	XLOC_009537	LincRNAs identified by Cabili et al	841	chr11	-	103711904	103715474	GGTAAGAAGAAGAAAGGAGAAGAAACCTTCTTCTGGTTTTTGTGTTTGTGGCTGCAGACT	intergenic
99	ASHGA5P041644	0.0149539	0.0530381	7.98611	ENST00000566733	RP1-140K8.5	GENCODE	7070	chr6	-	3905143	3912213	TGGTGAGTATACAGGTGTCTGTTGTGCTGTTTTCTGTGTGTTTGAATGGTTTCATAATTT	intergenic
100	ASHGA5P054820	7.83654e-05	0.00101413	7.98029	TCONS_00008143	XLOC_003595	LincRNAs identified by Cabili et al	245	chr4	+	84009929	84010241	AGAGGAGAGGACAGATTAATTCATTCAATAAGTGATTGAGTAGATACCTACTGGTGTCAG	intergenic
101	ASHGA5P058366	0.000850082	0.00599077	7.84988	uc001ysw.1	Z49973	UCSC_knowngene	154	chr14	-	106804494	106805235	TTACTGTGCGAGAGACACAATGAGGGGAGAGAAGAGGCCATGTGGAGACATAGTGGACTA	intergenic
102	ASHGA5P019712	0.000455156	0.00381513	7.81985	uc001oou.3	BC064339	UCSC_knowngene	892	chr11	-	68857483	68858409	TAAAATCGGAGACAGAGAGAGAGATGGAAGTACGTGCACATATCCTCTAGCTCTGTCCAC	natural antisense
103	ASHGA5P050417	0.000137454	0.00152992	7.80065	TCONS_00001553	XLOC_000895	LincRNAs identified by Cabili et al	979	chr1	-	85079754	85086673	TTTGATGCTGTATTCTTAGCACATGGAACCCTAAACCAAAGCCTGCACTGGGGCATTTGT	intergenic
104	ASHGA5P053828	0.000609186	0.0046936	7.76782	uc001gvu.3	BC016656	UCSC_knowngene	3499	chr1	+	200993076	200997920	AGACCACGTTAGAACCTCGGCTCCTGGAGTAGCAGAACCTCGGCTTCAATGGGACCCTCA	bidirectional
105	ASHGA5P057248	0.00117696	0.00766533	7.75853	TCONS_00014948	XLOC_007020	LincRNAs identified by Cabili et al	373	chr8	-	21222915	21267010	AGGATTCGAAATGGTAGAGGAGAGAGAGTGAAGTGGAAGAGATCTTGCAACATTTCCTGC	intergenic
106	ASHGA5P030495	2.5268e-05	0.000417388	7.7433	ENST00000457799	RP11-367J7.2	GENCODE	414	chr1	-	157644110	157646522	ATCACATAATTTATTACAGGTGTGTTCTGGAATAGTTTCTATAAATTGATCCATTCTTGT	exon sense-overlapping
107	ASHGA5P029672	0.00617678	0.0270782	7.7397	TCONS_00008338	XLOC_003787	LincRNAs identified by Cabili et al	403	chr4	+	175445331	175448018	TGAGGTCAAAGTGCAATGAGTCAAGGATAGTGACAACTGGAAGAACAGGAAGCAGTTTGG	intergenic
108	ASHGA5P029193	0.000312455	0.00282146	7.72246	NR_024334	FUT8-AS1	RefSeq	2026	chr14	-	65877310	65879335	TGAGATACCCAAGTACAAAGCTTTACATTTGCCTAAAAATTCCATTTTTGTCTGGTGTTC	natural antisense
109	ASHGA5P041149	0.0002508	0.00238776	7.67297	ENST00000457791	PMCHL2	pseudogene	237	chr5	+	70671656	70672163	GAGAAACTGGGGATGAAGAAAACTCAGCTAAATTTCCTATAGGAAGGAGAGATTTTGACA
110	ASHGA5P040676	0.00202462	0.011545	7.45796	ENST00000427169	RP11-495P10.5	GENCODE	1918	chr1	+	147767286	147769663	GGTCTCCTGTGATCTTTCAAGAAGAAGAAGAAATTATAAATGACCCAAAGCTTTGTACAT	intergenic
111	ASHGA5P049600	0.00568871	0.0255332	7.42568	ENST00000578693	AC006050.3	GENCODE	549	chr17	-	28894719	28895457	TGTGTCCTGTCTGCAGACAGAGGAACTGAAACGCGAGGTGGCTACCAACAGCGAACTGGT	intergenic
112	ASHGA5P029949	0.00614468	0.0269821	7.39059	ENST00000563217	RP11-532F12.5	GENCODE	250	chr15	-	41130748	41132691	TGAAGAGAGAGACACACCGTGATGACCTCCACATACCATATTTGATGACAGTCTTCCTTG	intergenic
113	ASHGA5P047858	0.0205621	0.0669754	7.37156	ENST00000433329	HBBP1	pseudogene	439	chr11	-	5263349	5264767	TCCTGGTTGTCTACCCATGGACCTAGAGGTACTTTGAAAGTTTTGGATATCTGGGCTCTG
114	ASHGA5P027411	1.32272e-05	0.000258698	7.36981	ENST00000546086	RP11-81H14.2	GENCODE	565	chr12	-	68727032	68835996	GATCCTGTAGCCCTTATTATTGACACCTTTCATTTAGAAATTTAGCACATGTCACATTAC	intergenic
115	ASHGA5P023092	0.0027767	0.0147988	7.36057	NR_038229	NTRK3-AS1	RefSeq	2663	chr15	+	88795960	88814297	GGGATTTTAGGAAGAAGAAAGAAGATACTAGACATTTCTCACAACAGCATTTTATGACAC	intronic antisense
116	ASHGA5P037933	0.000366508	0.00321115	7.30344	ENST00000564479	RP11-275F13.1	GENCODE	812	chr1	+	51795325	51800996	GAGAACTTCATGGACTGCTTTCACCTGTGCCATTGTCAACTTAAGAAGGCCCTTAATATG	intronic antisense
117	ASHGA5P035081	0.00701527	0.0297667	7.30202	ENST00000414404	AC078941.1	GENCODE	571	chr2	-	67402554	67442409	CCAGAAGAAGAAGATGAGCTTCAGTTATTCTAGCACAACTGCTGTGATATTTGTAAATAT	intergenic
118	ASHGA5P027418	9.62081e-05	0.00117829	7.18558	ENST00000548900	RP11-1143G9.4	GENCODE	599	chr12	-	69747272	69748005	CATCAGATGCCTTCATCAGCTGGTATTTTGCCTAAGATCTATTTAAGATAACCTTTTCTT	natural antisense
119	ASHGA5P021532	2.77524e-05	0.000446484	7.02309	ENST00000534135	CTD-2140G10.1	GENCODE	343	chr11	-	22467233	22468922	TCAGCTAAACCTAACCCTGATTCCTGACACATGGAAGCTGCAAAACATGAACTACGGAGT	intergenic
120	ASHGA5P053081	0.0256988	0.0792289	6.99949	ENST00000459691	EPS15P1	GENCODE	2071	chr7	+	46820970	46823041	GAGAGAAGAGACCTGACAGATTATCTATACTCTTCATATGTTAAAAGACCATTTCCTGTA	intergenic
121	ASHGA5P042742	1.24432e-08	1.62e-06	6.93648	ENST00000436492	RP1-125N5.2	GENCODE	557	chr6	+	169116744	169123604	TGCCCTGGGTCCCTTGGAATAAGCTTGATTTAATTATCAAATTACATGGAAAGAAATAAG	intergenic
122	ASHGA5P035265	0.000599166	0.00463567	6.85752	ENST00000556770	RP11-77A13.1	GENCODE	1011	chr2	-	119706881	119710559	AACCCAGTGCTTAAATCCATTACTATTCCTACCACCAGCAACTCTAACCCCACTGTAGGG	intronic antisense
123	ASHGA5P000009	0.000730534	0.00539775	6.84112	AF070541		NRED	1576	chr18	+	31329599	31331156	GAAATGTTTGTCTCTTCATGTTTCTCTGTCTTTCCCTTTCTCAAAGTAACAACTTGGGTT	intergenic
124	ASHGA5P015405	0.000141545	0.00156205	6.7751	ENST00000419979	RP3-525N10.2	GENCODE	534	chr6	-	69342554	69344216	GCTACAAAAGGCTACTGAGCTGGCCTGATGATGATCCTTCTGAGATATATTTATAGCAGA	intergenic
125	ASHGA5P026700	0.000165824	0.00175387	6.72618	TCONS_00012634	XLOC_005563	LincRNAs identified by Cabili et al	1339	chr6	+	170489432	170491877	AACTTCCCAGTTTCTATTTCAACCAGAAGAGAAAATGCTGAGCCCTCACTGACCATGGGA	intergenic
126	ASHGA5P022714	0.00451555	0.0214073	6.7032	ENST00000561362	RP11-20G13.3	GENCODE	323	chr15	-	99935383	99936798	GATATGTAAAGTCTGTCATCCATTTGCAGCAAATTTTGCCTACGGTATGAAATAGGAGTT	intergenic
127	ASHGA5P042240	0.000125084	0.00142152	6.65726	ENST00000439891	RP11-203H2.1	GENCODE	527	chr6	+	8328383	8342688	GAGAGAGAGGAGGAGATTTACATCACACAGCAAACAACCTAATAAATCTGTTAAACGCCA	intergenic
128	ASHGA5P045387	8.1288e-05	0.00104156	6.65571	TCONS_00000859	XLOC_000082	LincRNAs identified by Cabili et al	1245	chr1	+	20527033	20529294	GTTGAGTTCAAAATTCCTACAGAACAATCTGCCTGCTGTACCAGCGTGTCATTTCCCCAT	intergenic
129	ASHGA5P029735	0.035836	0.101548	6.64752	ENST00000555383	RP11-404P21.5	GENCODE	460	chr14	+	96677196	96681155	GAGACAGTGTCCCCTAAATACATCTGACAGCACTTTTGAATGGAAAAGAGAAAAAGAAAA	intron sense-overlapping
130	ASHGA5P035051	0.00359834	0.0179184	6.61613	uc002sag.3	AL833181	UCSC_knowngene	3727	chr2	-	60751623	60755350	CTGGTAATCAGCTGTTTCTGATTTTGCATGCTCTTCTATCTCTGGTAACAAAATAAAATC	intron sense-overlapping
131	ASHGA5P037716	6.15076e-06	0.000152208	6.60032	ENST00000566575	CTA-250D10.23	GENCODE	1078	chr22	-	42318026	42319104	GTAAGTTTCTCTCTCTTTAGAGACTCCACAATAAAGTTTTCAACATGGTAAGGTTTTCCA	intergenic
132	ASHGA5P051372	3.27843e-08	3.27e-06	6.5809	ENST00000451839	CHL1-AS2	GENCODE	508	chr3	-	237440	238542	CGCGGGACAGGGAGAGTTACAGGCTTCAGACTTTATCTCGTTGTGGAAAGCAAGAGACCA	natural antisense
133	ASHGA5P035403	2.07086e-05	0.000360442	6.57559	BQ447228		LincRNAs identified by Khalil et al	403	chr12	+	38450353	38450755	TCAAGCTCAACAAAGGAAGAAAGAAAGTAAAGTAAAAGGTCAGCTTCCAAAGCGGTGGAG	intergenic
134	ASHGA5P055517	0.00042171	0.00358343	6.56848	ENST00000538665	IFNG-AS1	GENCODE	1791	chr12	+	68383224	68415107	GCTTTAGTAAGACAATTTGTATAGTGTTCAGTGTGGATTAAAATGGAGAACACAGGTATC	intergenic
135	ASHGA5P022001	2.07601e-05	0.000360688	6.56606	ENST00000546770	RP11-711C17.1	GENCODE	342	chr12	+	74300719	74313117	CTTAAGAGACTTTCCTAAGGAAGTCAAAGGAAAAGAAAGAAAGTTTCAGATTACCTGAGG	intergenic
136	ASHGA5P036212	0.0017841	0.0104775	6.53106	uc002ubt.1	AK027541	UCSC_knowngene	2013	chr2	+	162101249	162105241	GTCTTCCAAGAAGCCTGGTTTCCACCTGGAAAATAAATTACTAAATTTGAATGTGTTACT	intergenic
137	ASHGA5P033839	0.00201939	0.0115212	6.46527	uc002las.2	LOC284260	UCSC_knowngene	3322	chr18	+	39766634	40098918	ATCTCTCCCCATCCCATCGTTTCTAGCTTATAGCATATGAATAAATGCAGTTTCCAAGTT	intergenic
138	ASHGA5P030754	3.72525e-06	0.00010545	6.46262	ENST00000558221	CTD-3094K11.1	GENCODE	402	chr15	+	91382953	91384608	CTATCGTCCTTCTAAAAGACACTTCAAAAAGAGGCAAAATCATGCCTTCCATACATATAT	intergenic
139	ASHGA5P030393	0.000569442	0.00446638	6.41556	TCONS_00008692	XLOC_004205	LincRNAs identified by Cabili et al	640	chr4	-	185299886	185303530	TCTGATTCTCCTCCAAGAAGCAATGCTTCTCTGAGGCTTTCACCTTTGCTCACATCAAAG	intergenic
140	ASHGA5P029772	6.40401e-05	0.000858746	6.32734	ENST00000520069	MEG3	GENCODE	465	chr14	+	101302142	101327096	TTTGGGTCCCACAGAGCACGACTTCGCTCCGTGAACAGCACCAACCCAAGTCTGTTCCAT	intergenic
141	ASHGA5P047803	0.00643705	0.0279723	6.32655	AW235165		LincRNAs identified by Khalil et al	431	chr20	+	1416447	1416866	GAAGGAAGGAAAGAAGAGGTGATCCAATCAGCATATTTTTTCTTTGAGAACATGAATAAC	intergenic
142	ASHGA5P003489	0.0130548	0.0477386	6.31881	ENST00000269201	LINC00470	GENCODE	343	chr18	-	1272318	1359440	GAGGAGCATGCAACAACAAGAAACAAATTTATTAGCTAACCTAACCACTAATGACGCAAG	intergenic
143	ASHGA5P036075	8.74713e-07	3.6238e-05	6.30922	ENST00000455309	AC017002.1	GENCODE	757	chr2	+	112248849	112268567	TAACCCCAGACCCACTATCCTCTGGATTTCTTTTATGTGAAACAATAAAATGTCTTGTAT	intergenic
144	ASHGA5P054208	1.4735e-06	5.1699e-05	6.29958	ENST00000444263	LINC00278	GENCODE	587	chrY	+	2870952	2965258	GTTGTTGAGAGGTAAGTACAACTAGTTCTCATTAATATTTCATGTCCTATGTGCCATACT	intergenic
145	ASHGA5P047395	0.000755409	0.00552288	6.29785	ENST00000453605	RP11-292F22.4	GENCODE	159	chr10	+	47556164	47566804	GAGAGAGAAAAAAGTAAAAGAAAAGAAACCCAAAAGGGAAAATATAGCTAAGGTGAACTG	intergenic
146	ASHGA5P057539	8.96943e-06	0.000193844	6.2809	TCONS_00018641	XLOC_008992	LincRNAs identified by Cabili et al	1100	chr10	-	130833654	130834943	ATTCTCCTTGGGTGGTTCATAGGAAGAGGCCAAGAGAGAGAGAAGGATGCTGTATTTATG	intergenic
147	ASHGA5P037710	0.000493243	0.00401499	6.23355	ENST00000420537	RP1-85F18.5	GENCODE	457	chr22	-	41570594	41593460	CAAACCCTGAGAGGAATTACTCTTCAATTCTCCTGGCTTTCGTTATCAATTATATGATAT	intronic antisense
148	ASHGA5P038731	8.54481e-05	0.00107783	6.22807	ENST00000450746	AC116035.1	GENCODE	436	chr3	+	30566236	30568677	GATAACTAAACCCTGGGAAGCTTAAGGAACAAAGTGTAACAAAACAACATGGATTGTTTT	intergenic
149	ASHGA5P045743	0.000827077	0.0058605	6.16849	ENST00000515258	FAM27E3	GENCODE	536	chr9	+	67785633	67786684	CTGACGCCCAATGTCTTCAACAAAGATGACTTCCCAGTCCGTCAGGGAGACATTTCTTCG	natural antisense
150	ASHGA5P026636	7.82247e-05	0.00101333	6.14354	ENST00000530510	RP11-702H23.6	GENCODE	609	chr11	+	74166392	74167870	CTAGCTGAGATCTGGGATAGTTTCTGAATTCAGAAGTGTTCACCAGCCACATTGCATGTA	natural antisense
151	ASHGA5P019138	0.00721749	0.0304553	6.14246	ENST00000469794	RP11-3K16.2	GENCODE	513	chr3	-	169331297	169341739	AAGAAAGGAGATAAGAAAATGGAGGCAAAGACAGATTGGATAACTTGCTGAACTTGGTGG	intron sense-overlapping
152	ASHGA5P055810	0.000590212	0.00458435	6.12902	ENST00000568302	RP11-173B14.5	GENCODE	549	chr13	-	76178835	76210130	ACTGTTACCTCTAATAAAGTTTCATCACTAGTTTCACCATGGTTAATTGGAAATGGCTTC	intronic antisense
153	ASHGA5P053049	4.99078e-05	0.000712725	6.12659	ENST00000458087	AC018647.3	GENCODE	1083	chr7	+	35756285	35759309	ATGCTCTGAAGTGAGGTAGAGGGGTAGAAATCAACATTGTGATATTGTACTATAGTTTTG	intergenic
154	ASHGA5P031351	6.23915e-06	0.000154101	6.11201	ENST00000565714	RP11-483P21.2	GENCODE	332	chr16	-	83823571	83837133	TCTTGCCATGAATGTGACGTGATTATCTTCTCCTACATCACACTGAAGTTTTATGAATGA	intronic antisense
155	ASHGA5P042845	0.00600895	0.026575	6.10526	TCONS_00019182	XLOC_009017	LincRNAs identified by Cabili et al	1343	chr11	+	356461	358128	AACTGAGTGAACTCCCACAATTTGAGCAACACCTCATTCTACATCCTAACCCAAAGTGTG	intergenic
156	ASHGA5P000597	0.000105587	0.00126269	6.09633	DC428746		LincRNAs identified by Khalil et al	577	chr2	+	143828536	143986326	AACAGATCAAACTGAGTTTATAGCCAGCACCATCTCTGCTGTTAGCTCCACCCTGAAGTT	exon sense-overlapping
157	ASHGA5P038200	0.000579131	0.00451298	6.07689	TCONS_00024658	XLOC_011944	LincRNAs identified by Cabili et al	1096	chr16	-	53075718	53076913	CAAAAAGCAAAGCAGTTCAGCCTGAAATTGACTACAGAGCTTCCCTTTGCTTCAGCAGAG	intergenic
158	ASHGA5P041757	0.00198866	0.0113857	6.07406	ENST00000419357	LINC00243	GENCODE	264	chr6	-	30766430	30798436	CTTCAACTGAAATCAGATCTTCTTAAAGAAATGCTTGGCTCTCAGACTGGGAACGGAAAT	intergenic
159	ASHGA5P041233	7.04413e-07	3.1068e-05	6.02674	ENST00000508742	CTC-454M9.1	GENCODE	679	chr5	+	88714623	88762215	AAAGAAGGTTTTCAGGTAACACAGATGGAGGTGATGATCTTTCTCATTTTGTGGAAAATA	intergenic
160	ASHGA5P034561	2.5754e-07	1.5119e-05	6.01	NR_026887	LOC80054	RefSeq	2281	chr19	+	33793762	33795963	ATTCATCAAATGCACACGAGGCACAAATGGGAATCAAGGGTGGATGTGCTGTGATGAAGA	bidirectional
161	ASHGA5P042865	0.00214865	0.0120927	6.00481	ENST00000567533	RP11-90P13.1	GENCODE	3208	chr7	-	161764	164972	ATGCCCTTGAAAATGCTTCCATCAGGAAACATTCAGACACCTAAATATATACTTTGTATC	intergenic
162	ASHGA5P038845	0.000686452	0.00514522	5.97049	ENST00000464125	RP11-475O23.3	GENCODE	821	chr3	+	58592806	58620167	ACTAGAGAGAGAGAAGACAGAGAAATATAGGCAGTGAGTGAGGCTGTTCAGAACTCATGC	natural antisense
163	ASHGA5P036929	0.0132871	0.0484379	5.92923	TCONS_00025171	XLOC_012193	LincRNAs identified by Cabili et al	1164	chr17	+	37916401	37920067	GGTTACTGCATAATCACATATGAATTAAAGCTAGAAGGGACCTAAGAGAACATTGAAATC	natural antisense
164	ASHGA5P049935	0.0191499	0.0633462	5.90414	NR_023926	LINC00470	RefSeq	2185	chr18	-	1268311	1359630	TTTCTTACAGCAACAACAAGAAACAAATTTATTAGCTAACCTAACCACTAATGACGCAAG	intergenic
165	ASHGA5P034321	0.00281085	0.0149134	5.90023	ENST00000270443	ZNF702P	GENCODE	2990	chr19	-	53471503	53496777	TTGACTTAACATTGAGTTCAAGTATTTGTTGAGATTAAAGTGTTTATGTTAAGAGGATTA	intergenic
166	ASHGA5P022653	0.00501307	0.0231745	5.89635	ENST00000560399	RP11-89K21.1	GENCODE	548	chr2	-	45148215	45150178	TTTCATGTTACAGCTTGTCAGGTTTGATCTCCTGTCTCTTGGGTTGAGAAACCATCCCCT	intergenic
167	ASHGA5P038698	1.80871e-07	1.1441e-05	5.89173	ENST00000443565	RP5-887A10.1	GENCODE	473	chr1	+	81106968	81112473	ATTTTTGGCTTTCGGCTCTGGAAAATATGAGAAATATGGGCAATTACTCTCTGAAGAAAG	intergenic
168	ASHGA5P036327	2.22778e-05	0.000380601	5.88735	uc002utn.1	BC062769	UCSC_knowngene	1407	chr2	+	197124837	197128922	GAAGGGATGCTTATTTTGTTTGCTTTGTAAGAAATGCTTCTGATTCAGTAACTGGGCAAT	intronic antisense
169	ASHGA5P045621	4.45751e-07	2.2667e-05	5.88546	ENST00000428006	RP11-536O18.1	GENCODE	477	chr9	+	13446524	13487510	ATCTCTGTCTCCAACCCACAAACCACATGCATCATAAATAAATTAAAATACCAAAACTTT	intergenic
170	ASHGA5P042082	0.00992817	0.0388586	5.87658	ENST00000417932	RP11-10J5.1	GENCODE	573	chr6	-	138264215	138266939	GTCCTTTATACAGTAATTAATATTTAAAAGATCTCGCTAAAGCCCTGTCAAGTCCTGAAG	intergenic
171	ASHGA5P029329	0.0036914	0.0182866	5.8726	ENST00000569214	RP11-872J21.3	GENCODE	1512	chr14	-	96967146	96968658	CTTTTTTCACAGAATGTCTAGTAGGACTGGTGACTCCGAATGGGAAAAACACAGGACCTA	bidirectional
172	ASHGA5P029200	0.000663112	0.00500264	5.86954	ENST00000556301	CTD-2325P2.4	GENCODE	279	chr14	-	69093882	69095162	CCAGATTGTGTCCCTTAAAGGCCACACTGCAGCAAGGGCAGATAAACAATTTCATGGCAA	intronic antisense
173	ASHGA5P030345	0.00552865	0.0249791	5.85902	AK126099		LincRNAs identified by Khalil et al	2985	chr10	+	11437806	11440791	ACTGGACTACAGTAAAAATGCAAGTTTATCAAGATGCTCCCAGCACAACCCTGTGTGCAG	intergenic
174	ASHGA5P033991	0.000128395	0.00144899	5.84132	TCONS_00004031	XLOC_001869	LincRNAs identified by Cabili et al	213	chr2	+	220603492	220607703	AATGGGTCAGAGTGTTGTGAGGAGATTGCCGGACTCCTGACGGGGATGCTGCCGTGTTTT	intergenic
175	ASHGA5P018391	1.10228e-06	4.3052e-05	5.82555	ENST00000452919	CHL1-AS2	GENCODE	726	chr3	-	237440	239024	GCAGGGTCCGGGAGAGTTACAGGCTTCAGACTTTATCTCGTTGTGGAAAGCAAGAGACCA	natural antisense
176	ASHGA5P016487	0.000753413	0.0055195	5.82397	NR_033994	TNFSF10	RefSeq	1910	chr3	-	172223297	172241297	CGTTAGAAAGAAAAGCAACAAAATATTTCTCCCCTAGTGAGAGAAAGAGGTCCTCAGAGA	exon sense-overlapping
177	ASHGA5P041981	0.0145228	0.0518493	5.74964	DA195606		LincRNAs identified by Khalil et al	564	chr14	+	51741818	51742382	TTAAGTTACTTGGGTTTGGCAGCTCAGTCTGTGTGTGTTAGGGTGTGTTCTTATATCATT	intergenic
178	ASHGA5P054045	2.73417e-05	0.000442622	5.74466	ENST00000420327	RP13-348B13.2	GENCODE	281	chrX	+	88678736	88696910	GTCTGCAAACAGATTCCTATTTAGATGTTGTTGAGAGGTAAGTACAACTAGTTCTCATTA	intergenic
179	ASHGA5P040512	4.75404e-07	2.3529e-05	5.74045	ENST00000502589	RP11-466P24.6	GENCODE	756	chr5	-	75581366	75607287	CATCCCATTGGAACATACAGACTATTTGGATATCACTGAATACATGAGCAGTTCAAATAA	natural antisense
180	ASHGA5P021097	0.0152541	0.0538671	5.71073	ENST00000525023	GS1-393G12.12	GENCODE	444	chr8	-	145538252	145538801	CAGGGCCAAGGAGGCCACTGCAGCCCGGCCCTTCTGTGCCCTGGGCCCCTCCTCATTGCA	exon sense-overlapping
181	ASHGA5P053371	1.30557e-06	4.8095e-05	5.69534	uc003xna.3	ADAM5P	UCSC_knowngene	1870	chr8	+	39172181	39274897	CAGTCTCTAACAACCTTGAATGCTACTGCTTGGAGAGAGGAGAGTAACAAATACATTATC	intergenic
182	ASHGA5P019198	0.000234363	0.0022696	5.67737	NR_045213	FCGR1B	RefSeq	2202	chr1	-	120926127	120935944	CAAGTGCTTGGCCTCCAGTTACCAACTCCTGTCTGGTTTCATGTCCTTTTCTATCTGGCA	exon sense-overlapping
183	ASHGA5P036663	0.000972122	0.00663797	5.67356	TCONS_00026702	XLOC_012810	LincRNAs identified by Cabili et al	597	chr18	-	32486954	32493728	CTGAAGTGTACTTCACTGTGCATAGAGAGAGAAACCTGCTTTTGAAACTCCTTCCAGAAG	intergenic
184	ASHGA5P048551	0.00136696	0.00859203	5.67181	ENST00000420153	AL928742.12	GENCODE	166	chr14	-	106066240	106066546	AGGAAGCTACCCCCAATAAACTGTGCCTGCTCAGAGCCCCAGGTACACCCATTCTTGGGA	intergenic
185	ASHGA5P033077	4.84172e-05	0.000694497	5.65037	TCONS_00028173	XLOC_013531	LincRNAs identified by Cabili et al	249	chr20	+	43808763	43816966	CCTGAGAACCCTGAGCTTGTTGGATAACCCAACCTGCAAAACACAGCTCACAGATTTCTG	intergenic
186	ASHGA5P031964	0.00474343	0.022181	5.59975	TCONS_00029808	XLOC_014244	LincRNAs identified by Cabili et al	1344	chr22	+	39462293	39465987	GAATCTCAATGAACAAAATGCACTGGGACCTACTATGTACCCAGAAAAATGAAAAGTAAA	intron sense-overlapping
187	ASHGA5P030696	0.000202948	0.0020402	5.59829	ENST00000559277	RP11-761I4.3	GENCODE	479	chr15	+	81633988	81635491	CGGCTGCGACCAATAGTAGCTTAAACATGGATTATTTTCTTTTTAATTTCTTCCTGCAAA	intronic antisense
188	ASHGA5P014636	1.44866e-05	0.000279119	5.5895	ENST00000412060	Z83851.1	GENCODE	475	chr22	-	42760407	42765214	TGCGGGCCAGCGTTTTCCCCCTACCGGAAATCTGATGGGCTTATGACATCATGGCTGGCT	intergenic
189	ASHGA5P017552	0.00683968	0.0292711	5.55192	NR_038983	LOC100506134	RefSeq	746	chr2	+	166790366	166804831	TGAGGATAAGTATCTGCTTAGGACACAGAAGTCAATTACACCCAAACCCTGGATGGAATC	intronic antisense
190	ASHGA5P035194	0.000331491	0.00296444	5.53573	ENST00000428188	AC007271.3	GENCODE	382	chr2	-	102789080	102798568	GAGAGAGAGAGTAAATAAACTTGTGTAAGTTAATTGCATCAACTACAAATAAGACCTGTA	natural antisense
191	ASHGA5P028021	0.00012258	0.00140663	5.52323	ENST00000566942	RP11-284N8.3	GENCODE	3481	chr1	-	111196181	111199662	AGTCAACAGTCTGTGATACATGCTGTACTTTTACTGATTAGCAATGCAATGTTACTGTGA	intergenic
192	ASHGA5P040884	7.3811e-09	1.075e-06	5.50496	ENST00000518902	CTB-43E15.3	GENCODE	490	chr5	-	173146248	173173214	GCCACCTCTATATACATGTACACAAAGCCACACAGTTTACACAGTCACAGGTATTTAAGT	intergenic
193	ASHGA5P017716	8.05124e-05	0.00103367	5.49862	ENST00000445003	RP11-290F20.3	GENCODE	539	chr20	+	48884035	48894964	GCAGAGCCAGTGGAATGTCACCATCGCCCAGGTGGGGATTTTTGTGTGTTTTGTTCACTG	intergenic
194	ASHGA5P054139	0.00394692	0.0192913	5.48765	ENST00000438602	RP11-308D16.4	GENCODE	582	chrX	+	136075645	136103789	CCCCTAATTACATAATTTTAAGCATATATATAAAAATGTAAAATCTCATTGTCTGGCCTC	intergenic
195	ASHGA5P028138	0.000143225	0.00157256	5.47002	TCONS_00010083	XLOC_004540	LincRNAs identified by Cabili et al	344	chr5	+	126565032	126567810	CCGGGAAGAGAAAGCAGTTTTTGGACAACAGTTCCTTCACCTCAGCATTTTTCATGGATT	intergenic
196	ASHGA5P017330	0.0255626	0.0789592	5.46168	NR_038984	LOC100506134	RefSeq	690	chr2	+	166790366	166804831	CCACAAAAATTATCTGCTTAGGACACAGAAGTCAATTACACCCAAACCCTGGATGGAATC	intronic antisense
197	ASHGA5P016925	0.000196982	0.00200965	5.44734	ENST00000435744	ANKRD30BP2	pseudogene	1610	chr21	+	14410528	14439354	CTCTGCAGTGTGAGATTGACTTTAAACCAAGAAGAAGAGAAGAGAAGAAATGCCAATATA
198	ASHGA5P022671	0.00020453	0.00205115	5.40708	ENST00000560655	RP11-279F6.3	GENCODE	428	chr15	+	69884551	69988069	TAGACCTAAAGGTGGGCAAGAAGAAGAAGAAGAGGAGTTTGGATGCTTCATCTCTGCTGA	intergenic
199	ASHGA5P030224	5.58352e-07	2.6521e-05	5.38421	ENST00000558015	RP11-561C5.6	GENCODE	470	chr15	-	85857897	85858747	CTCACTACCCAGAGAGAAGCAATGTTGACATATTTCTCTTCCTCAATGCATATTTATATA	intergenic
200	ASHGA5P020951	4.64687e-06	0.000122471	5.38345	ENST00000522471	RP11-150O12.3	GENCODE	397	chr8	-	37455152	37456296	AGGGGTGCAGGGCTTCCCAGGAATCAACAATGCCCAAGAAGGAAGGGATTGTAGAAATAG	intergenic
201	ASHGA5P032773	0.00551903	0.024953	5.37551	ENST00000441700	AC091153.4	GENCODE	387	chr17	+	4578673	4600129	GAAAGTGAGAGCCAGAGAGAGACAGAAACAGGGAATGACCATTTACATATGTACACATAG	intronic antisense
202	ASHGA5P019762	2.76965e-08	2.85e-06	5.36422	ENST00000502725	NRG3-AS1	GENCODE	280	chr10	-	83988740	83992333	TGAAGATACCAACGGATGACTGTGTTTTAAAAGGCGAGAGAGAGATGTCACTCAGGACTG	intronic antisense
203	ASHGA5P033175	5.44704e-05	0.000756184	5.3615	ENST00000421610	AC090627.1	GENCODE	670	chr17	+	46371706	46385191	GTGTGGGGGTCTTAATAATTTCTCAGTTCTCAATCTACTCTATGTCATATTAAAGAGGAT	intronic antisense
204	ASHGA5P045769	0.000106505	0.00127111	5.35512	ENST00000451152	RP11-63P12.6	GENCODE	588	chr9	+	74920432	74930380	TAAAATTCCCCCAGGCTGAGTGTTTCAGGAAACACCATAAATAAATAAAATTGTCTGTGT	intergenic
205	ASHGA5P047678	0.0135543	0.0491909	5.35492	AA878381		LincRNAs identified by Khalil et al	475	chr2	+	232484697	232485161	CCTGCTTTCTCCCTGAACTCCCAGATCACTGTTATCAAAGACATAACATTGTATTATTCA	intergenic
206	ASHGA5P038942	0.00216132	0.0121482	5.35056	ENST00000563632	RP11-757F18.5	GENCODE	1937	chr3	+	111852269	111854206	GGATTTTTGTATTATCCTTGTATTTGATGGTTGTTTCCAGTTTGGTCACTCATCTGTTTG	bidirectional
207	ASHGA5P040004	0.000448577	0.00377402	5.34933	ENST00000508174	RP11-234K19.2	GENCODE	2080	chr4	+	80413569	80497614	GCCTGTGTGTTCCTTCCCCTAAGCTTTAAACTCAACTGATATTAAAGGTGATTTGAAAAC	intergenic
208	ASHGA5P033189	1.93643e-06	6.4414e-05	5.31675	ENST00000435491	AC091133.1	GENCODE	483	chr17	+	47009152	47014462	ACAGAAAATGTTTAAAGGTTCCAGCGGGGAGAGAGAGAAGTGACTTTCAGCATGACAGAG	natural antisense
209	ASHGA5P056371	0.0205007	0.0668201	5.29461	TCONS_00003800	XLOC_001595	LincRNAs identified by Cabili et al	357	chr2	+	102604420	102605462	ATTGGGACTATTGGTGGGAGAAAGAAGCAGAAGGAGATCCTGGAACCAAAAACACTTCAG	intergenic
210	ASHGA5P050571	0.00243227	0.0133471	5.29254	ENST00000458519	AC008268.2	GENCODE	3018	chr2	+	96459476	96465916	TTAACACCCCCTCTGACCCCTCCTATTCCAGGTCATAGAGCAGCTGCTGGTTAGTGGGCA	intergenic
211	ASHGA5P020729	0.00106423	0.00710234	5.29147	ENST00000519008	LINC00293	GENCODE	575	chr8	+	47733858	47759688	GTCCGCGATGGTGGTATTGCTCCATATGCCTGAGACCCTAACAAAAGCCTAATTACAACT	intergenic
212	ASHGA5P035558	3.88034e-05	0.000582365	5.289	TCONS_00004316	XLOC_002176	LincRNAs identified by Cabili et al	451	chr2	-	79102284	79107703	TTTTAAGAGAGAGAGAGGTTCAGGAAACATCTGAAGGGGAATGGGCAAGTGATGCCTGAA	intergenic
213	ASHGA5P031839	0.00057912	0.00451298	5.2696	ENST00000563811	RP11-351A20.1	GENCODE	428	chr16	+	65614570	65680850	ACTACAAGAACCAGCCAACCCGCAGAATTACAAGAACAATAAAAGGTTGTTTTCTTAAGC	intergenic
214	ASHGA5P055694	4.35277e-06	0.000115943	5.26892	NR_033878	LOC387895	RefSeq	621	chr12	-	127215246	127256808	CCCCTTTATAGCTGGTATGTTTTCTTCTTATGGACAATGAGAAACATGTAATAAACTGTG	intergenic
215	ASHGA5P023254	0.00859479	0.0348108	5.26361	ENST00000576034	RP11-748L13.1	GENCODE	643	chr10	+	27547690	27577753	GTTATGTTAGCAAAGGCTCAGCAAAAGAAATCCAAGAGGACAAACACACAGGAAAACTTG	intergenic
216	ASHGA5P056362	0.00335821	0.0170125	5.25441	TCONS_00003714	XLOC_001500	LincRNAs identified by Cabili et al	942	chr2	+	65257878	65278178	TAATTTCTTGATTGTCCCAAATTTGGCCAATGAAAAAGTCCTTCAAGGCCAGGTGTGGTA	intergenic
217	ASHGA5P057632	0.00414051	0.0199665	5.24965	TCONS_00019972	XLOC_009249	LincRNAs identified by Cabili et al	663	chr11	+	91577563	91589682	AGAGAGAGAGAAAAGATCTGAAGAGAGTGGTTGCAGTTTGAGCTCTGTCAATGGGACAGT	intergenic
218	ASHGA5P050221	8.17407e-05	0.00104486	5.24004	NR_038332	LOC100505622	RefSeq	701	chr19	+	42636780	42641251	TAAAAATACCTTGGTAATTTATCACTTAATAAATATCCAATAAATGCTATTATGTGCCAA	intronic antisense
219	ASHGA5P042235	9.88678e-06	0.000208458	5.22734	uc003mxa.3	BC039678	UCSC_knowngene	1328	chr6	+	6725118	6730141	TGTTATCAGGAAAGACCAACCCTAACCCCAGTTCCATGGAGTAAAGATTAATTAATCTAA	intergenic
220	ASHGA5P056317	0.0265022	0.0811077	5.22474	TCONS_00002400	XLOC_000895	LincRNAs identified by Cabili et al	806	chr1	-	85079754	85086497	ACTCCTCTTGCAGAAAAGCCTTTGATGCTGTATTCTTAGCACATGGAACCCTAAACCAAA	intergenic
221	ASHGA5P016541	0.0015907	0.00960719	5.21112	ENST00000431464	RP11-308D16.4	GENCODE	646	chrX	+	135991633	136103777	GTTTGTAGAGAGACAGTTGGATTTTTTTCCTGTTTCTGGTTAATTGCTAAAATCTACAGT	intergenic
222	ASHGA5P044803	0.00279213	0.0148515	5.19584	TCONS_00001103	XLOC_000346	LincRNAs identified by Cabili et al	406	chr1	+	112549542	112550756	ACCCAGGCCTTCAACTCCTAGCTACGGCCCCTTCCTGGAAAAATATCTGTTAGATTAAAA	intergenic
223	ASHGA5P042643	0.000105526	0.00126269	5.18639	ENST00000434255	RP1-32B1.4	GENCODE	216	chr6	+	135581133	135582071	TACATGATAGAGTGGAAGCCACAAAGGAAGAAGAAGAAGAGATTCTATCTGGGTATGGAG	intergenic
224	ASHGA5P017207	0.00964235	0.0381312	5.17885	ENST00000438905	RP11-748L13.1	pseudogene	707	chr10	+	27551885	27577753	TTACAAAGACTATGCTCAGCAAAAGAAATCCAAGAGGACAAACACACAGGAAAACTTGAA
225	ASHGA5P016640	1.92414e-06	6.4305e-05	5.17341	ENST00000432473	Z83851.1	GENCODE	780	chr22	-	42760405	42765174	TCAGCAACCCGGGGGCAGCGTTTTCCCCCTACCGGAAATCTGATGGGCTTATGACATCAT	intergenic
226	ASHGA5P033880	1.42949e-05	0.000276248	5.15207	ENST00000579862	RP11-775G23.1	GENCODE	852	chr18	+	63273325	63319289	TCAGAAGTCTCCCCACTGTGGATGGGAGACAGAAAAGAAAGAAAGAGCCTGAATTACTGA	intergenic
227	ASHGA5P057433	0.00011924	0.00137684	5.13874	TCONS_00017288	XLOC_008109	LincRNAs identified by Cabili et al	333	chrX	-	6687404	6895201	GAGACACTTGAGAGAGAGATACAACAAAGCTTTAAAGCACGAAAAAGATGAACTCGAAAC	intergenic
228	ASHGA5P017705	1.04182e-06	4.1567e-05	5.13442	ENST00000444879	CHL1-AS2	GENCODE	488	chr3	-	237440	238882	GCAGGGTCCGGTCGCCAATCTGCTTTTCTCCCATTGCTGCGTCTTAGAGGGGTGTGGTGC	natural antisense
229	ASHGA5P029388	0.00513775	0.0236413	5.11956	ENST00000497872	AL928768.3	GENCODE	359	chr14	-	106170300	106170939	AACCTCTTGGAGAAGCCAGCTATGCTTGCCAGAACTCAGCCCTTTCAGACATCACCGACC	intergenic
230	ASHGA5P021606	1.40149e-08	1.721e-06	5.11701	ENST00000536112	RP11-81H14.2	GENCODE	417	chr12	-	68825634	68826434	TGCAGTTGTGTGACCTTGGGTAGTTTCTTCAACTACAGAAAGAGAGTTGAGCAGATGCTC	intergenic
231	ASHGA5P028797	1.63473e-05	0.000305332	5.11694	ENST00000444663	C13orf44-AS1	GENCODE	499	chr13	+	44716681	44722166	TCCATCCTGGCTCATCTCCTCTGTGTTCTCATAGCATCATATTATAGAATGGATCACAAA	natural antisense
232	ASHGA5P031893	9.97019e-05	0.00120931	5.1114	ENST00000561529	RP11-432I5.1	GENCODE	873	chr16	+	71599691	71612090	GGGAAACTGAAATCTTTATCTAATCTCATCCTTTGTATATTCGTCTTGGATTTGCTGAAG	natural antisense
233	ASHGA5P030753	4.02827e-05	0.000599304	5.10137	TCONS_00006387	XLOC_003006	LincRNAs identified by Cabili et al	609	chr3	+	196326510	196327216	ATTCCCTCAGCCTGTGTATGAATCATGATCACCATTCACTATAGAACCCTGACCTGTGTC	intergenic
234	ASHGA5P042861	1.83621e-05	0.00033208	5.1005	ENST00000469418	AC093627.6	GENCODE	888	chr7	-	20833	35479	GAGGAGCTTCAACTTCCTCAGGGCAGCACGGGGGTCGTGTTAATTTGGTGTTCTTCATTG	intergenic
235	ASHGA5P042079	0.00247844	0.0135318	5.09614	ENST00000440578	RP11-356I2.2	GENCODE	1025	chr6	-	138144809	138147031	ATATCAAAATTTGCCATGGTGCCCAGCATGGTTCAAGATCATAAGTGTCAAGCACATCAG	intergenic
236	ASHGA5P026076	3.224e-05	0.00050429	5.0849	ENST00000529881	RP11-555G19.4	GENCODE	1856	chr11	-	134815477	134846593	ATGTATTTTCCTTAGAGAGCCCATGGAGGAGAGAGAGGTGGCTAAAACAAGAAGAGATCT	intergenic
237	ASHGA5P030519	0.00925981	0.0368998	5.06172	TCONS_00008505	XLOC_003985	LincRNAs identified by Cabili et al	242	chr4	-	76103903	76105665	TCCTTGATGTGATCTCTGCACATCATGCAACCCTAAACCTAAATATATTCTCTGTGTGGG	intergenic
238	ASHGA5P056746	0.0273182	0.0828182	5.01827	TCONS_00008317	XLOC_003772	LincRNAs identified by Cabili et al	869	chr4	+	170833987	170862789	AGCTTTGTTTTTGCAAAGCTCTGGAGCTTCCCTCTCTGCTGGTCACTCATTCTTCTCTCT	intergenic
239	ASHGA5P055461	0.0134082	0.0487697	5.00958	TCONS_00028266	XLOC_013612	LincRNAs identified by Cabili et al	3322	chr20	+	62030713	62034595	ATGGCAGGTCCAAGCCCTGTGAACCATCCCTCTCACACCACGTCTGCCGGGCACCCTCCA	intergenic
240	ASHGA5P051847	0.00961191	0.0380457	4.99142	NR_037950	TM4SF19-TCTEX1D2	RefSeq	1022	chr3	-	196042955	196065291	TCAGCTTACAAAACATTTATCAGAAAACATTAAAGATAAATTAAAAGGTAATCATGGTGA	exon sense-overlapping
241	ASHGA5P018460	0.000348569	0.00308304	4.98509	ENST00000453795	AC025627.9	pseudogene	1220	chr17	-	20415872	20420792	TAAGCATCTTGGTGGCTGAGCGGTGACCACCTGTCAGGTGCCTACCATTGTGGAAGAGGT
242	ASHGA5P029446	3.40624e-07	1.8102e-05	4.98493	uc021rpi.1	AF532840	UCSC_knowngene	245	chr14	+	22356438	22356683	AAGGTTTACAGCACAGCTCAATAAAGCCAGCCAGTATGTTTCTCTGCTCATCAGAGACTC	intergenic
243	ASHGA5P041335	0.000913169	0.00631523	4.98114	ENST00000506859	RP11-359P5.1	GENCODE	561	chr5	+	122371965	122390362	ATAGCTCTGCAGAGAGAGAGATCAGATCTTGCAAGTGCAGAGAACAAGACACCTGGATTT	natural antisense
244	ASHGA5P044227	0.00522548	0.0239408	4.97602	ENST00000517495	CTD-3080F16.3	GENCODE	255	chr8	-	41132633	41134522	ACAAGTGACTTCACTTTTGAGCATCGGTTGAACCAGATTTAACGTCTCTTCCAGTTCTAA	intron sense-overlapping
245	ASHGA5P031445	7.60269e-06	0.000175729	4.97478	ENST00000566997	RP11-616M22.5	GENCODE	249	chr16	+	1307339	1308075	TTGCTATGTGGAGAGAGAAATCACACGGGGGTCTTGCTGGAAGGAGAGAGACCGGTGCTG	exon sense-overlapping
246	ASHGA5P020272	8.33981e-06	0.000184012	4.95704	NR_045958	EDNRA	RefSeq	3969	chr4	+	148402068	148466106	GTGTTGACAGTTCTACCAAGATGTAAAGGACTGGTGGCTCTTCGGGTTCTATTTCTGTAT	exon sense-overlapping
247	ASHGA5P032324	0.000206224	0.00206176	4.94922	ENST00000579378	RP11-218M11.3	GENCODE	280	chr17	-	28877510	28878207	AGTTCCCAGTGAAAACTGGAGGTTGCCATCACCTAACCACACATGCAATAAAGTCTTCTG	intergenic
248	ASHGA5P015232	0.00762709	0.0318493	4.94363	ENST00000418209	IGKJ5	GENCODE	253	chr2	-	89130699	89161435	GAAATCAAACGAAGCAGTTTTGCATCAGTAGCTGCATCTCCTCCATGATTCTAGCTGCCA	intergenic
249	ASHGA5P016728	1.21221e-07	8.589e-06	4.92076	ENST00000433531	RP11-69I22.3	GENCODE	417	chr6	-	65438729	65443460	GCTCCTGGATGCTCCATCAGCAGAGAGCAGAGAAGAGAAGCAACTGGATATCCAAGAGAA	intron sense-overlapping
250	ASHGA5P020040	1.1233e-09	2.43e-07	4.91692	NR_039975	LOC100506229	RefSeq	1529	chr4	-	185814153	185820615	AGCTTGCCCTGAGGACAGCACATTGCACTCTCACCTCCTTTGCAGTTAAGTGTGAAATAG	intergenic
251	ASHGA5P026506	0.0018269	0.0106854	4.91529	BX106475		LincRNAs identified by Khalil et al	285	chr6	-	99292443	99292697	CCCCTTTCATAAGAAAAAGGAATTTAGAGAGAGAAGAAAGTCTCAAACAGGATTAAGGTT	intergenic
252	ASHGA5P032242	2.77929e-05	0.000446581	4.91431	uc002gua.4	CCDC144B	UCSC_knowngene	8695	chr17	-	18441114	18528930	TGCGGTGGCTGCTTGGCTTGGCGGTGGTCGCTTGGCTTGGCGTGGCAGTGATCGCTTGGC	intergenic
253	ASHGA5P033040	6.55867e-05	0.000875863	4.88311	ENST00000444464	AC084809.3	GENCODE	512	chr17	+	31232679	31233602	GTGTTTTTGGCCTCCAGCTTACTTCGTGAACATAATAAAGGAAAGGCATTTTCTCTTGTG	intergenic
254	ASHGA5P000023	0.000618943	0.00476012	4.87985	AI862052		LincRNAs identified by Khalil et al	463	chr3	-	137766642	137767720	TCTCACCCTGACCATTGCTTCGTGTGAGAGCTTGAGTATTCATGCTGTGATGTGTGGATT	intergenic
255	ASHGA5P029857	0.000444998	0.00374938	4.87656	uc021sff.1	AJ004954	UCSC_knowngene	426	chr15	-	22448275	22448786	GGAGGCAGCTGTGCTGGGGCTGAGAAATGAAAGGGATTATTATTTTTAATGTTGTTTACA	intergenic
256	ASHGA5P025643	1.24907e-08	1.62e-06	4.86612	NR_024146	GHRLOS	RefSeq	1499	chr3	+	10327437	10335133	TTAGAGAGAGGAGGGCAGCCACTGAGGATTCTTGAGGAGAGAGAGACCATAGAATGAATG	natural antisense
257	ASHGA5P019652	8.31098e-05	0.00105655	4.85887	uc003knd.3	FLJ35946	UCSC_knowngene	1861	chr5	-	98105321	98108787	CGAGGCTCAGATTATTTAAATTTTCCACAAATTTCTACGGATTAATTCAATGGCAGCTCA	natural antisense
258	ASHGA5P036215	6.67601e-08	5.514e-06	4.85409	TCONS_00027384	XLOC_013368	LincRNAs identified by Cabili et al	3760	chr19	-	47137990	47142802	TAGAGAGACTGTGTTTTCTAGTGAGTGTGAGAGAGGCACAGAGAGAGTCACACAATAGGA	intergenic
259	ASHGA5P020997	0.00340953	0.0171993	4.84271	NR_046232	C8orf69	RefSeq	522	chr8	-	96219234	96228602	CATCCAGAAGACCCCCTCCCTCTTCCCTGAGCTCTGTTTCTTCCATGAGGTTGAAGAAAA	intergenic
260	ASHGA5P015468	0.000433796	0.00367169	4.83714	ENST00000420566	AC006050.3	pseudogene	1258	chr17	-	28894717	28898766	GCAGAACAAGATCCTCACAGCCACCTTGAACAATGCCAACATCCTGCTACAGATTGACAA
261	ASHGA5P044546	0.00131545	0.00832069	4.82901	TCONS_00014758	XLOC_006843	LincRNAs identified by Cabili et al	391	chr8	+	74005609	74006141	GCTCTGTTTTCTGATAAACCAATTTCTCCCCCTAAAAACTCTGTGTACTGATATTTTAGA	intergenic
262	ASHGA5P030583	0.000776119	0.00561285	4.82126	ENST00000558368	RP11-643M14.1	GENCODE	1921	chr15	+	62352712	62354633	GGGAGAAGTGAGTAACACTAATGCTTTGTCTAATAAAGTAATTCCTTACAGTTCTATGGT	bidirectional
263	ASHGA5P040100	0.000810082	0.00578114	4.80023	ENST00000511919	RP11-93L9.1	GENCODE	590	chr4	+	124571445	124851509	ATGAACAAGAAAGAGGACGTCTTATTATCTGGTGTCTGGCTTGCTGATTTAATAACCTAG	intergenic
264	ASHGA5P019329	0.0210801	0.0682171	4.7892	ENST00000478377	HYDIN2	pseudogene	1785	chr1	+	146310554	146334210	TGGGTGCAAGGTTTAAATGGGACATCAAAAAATTTGAGCCTCATTTCTCCATTAGCCCAG
265	ASHGA5P046415	0.0268824	0.0818309	4.77893	ENST00000399966	WASIR1	GENCODE	1054	chrX	-	155244287	155246502	GGCAGTGTATTTGTAATGGTACATAAAATGACGTCTGCTTTATAAGCATTCTCATTCCTA	intergenic
266	ASHGA5P036289	6.6997e-09	9.99e-07	4.77526	ENST00000428474	AC104820.2	GENCODE	511	chr2	+	181988622	182227638	CCAAGCTCAGTTCCAGAATCACATGATGAAAAGAATGATGGAAAGAAAATGTTTGTGATA	intergenic
267	ASHGA5P013408	0.0295062	0.0880164	4.76832	ENST00000393515	ANKRD36BP2	GENCODE	1737	chr2	+	89065418	89106116	CTAGATGAAGTGCTTGTCCTAGTACCTTAGCACATGGTTGCTGAATACATGAATGAAGAG	intergenic
268	ASHGA5P030667	0.000379205	0.0032981	4.75029	ENST00000560590	RP11-307C19.2	GENCODE	702	chr15	+	77861311	77865206	TAGGATTTGGACACTGGGGCTACAGGAATTCAAGAAAGAAGAATAAAGAAGCAGCCTTGA	intergenic
269	ASHGA5P027814	0.000120646	0.00138936	4.74277	NR_036466	LOC100499405	RefSeq	2469	chr12	+	9392598	9395645	GGTCATACGCTCAGGGAATGTTTATTATTGGAACAATTTAACCTACCAGCTTGTTATTTT	intergenic
270	ASHGA5P029306	0.0067977	0.0291487	4.74259	TCONS_00008392	XLOC_003842	LincRNAs identified by Cabili et al	966	chr4	+	190598740	190600367	AATGAAGAAGCCAGAACACATGAACACGAAACCAGCCAACCAACAAACACAAGCAGCATG	intergenic
271	ASHGA5P034117	0.0105282	0.0406429	4.73642	uc010ecl.2	ZNF826P	UCSC_knowngene	1063	chr19	-	20451077	20607771	ATTTTGAGCTCTTCTGCTCTAATTTGGTTAATATTTACATTAAATTTCTACTTCCATCTC	intergenic
272	ASHGA5P030398	0.00114834	0.00752073	4.73591	TCONS_00009189	XLOC_004205	LincRNAs identified by Cabili et al	700	chr4	-	185289387	185303530	GGATGTCTGTCACACCTCAGGAAACCTGCCAGGAATACCAAAGGGAGTGAAAAATCCAAG	intergenic
273	ASHGA5P042795	0.0121611	0.0451771	4.73506	ENST00000432694	RP1-15D23.2	GENCODE	799	chr1	+	172745044	173033155	GAGAGATGAGAAACTATCAAAAAGAAGTTCCTGACATGGCAACAGTGTATCATCCAATGA	intronic antisense
274	ASHGA5P031639	1.36023e-05	0.000264664	4.71334	ENST00000562902	RP11-426C22.5	GENCODE	580	chr16	+	29127447	29229181	GAAAACGGGTGAGCCTTATGTGTGTACGTGATACCGCAATAAACCTGACTTGTAAAAGCA	intergenic
275	ASHGA5P027547	0.00580322	0.0258575	4.67677	ENST00000549251	RP11-474B16.1	GENCODE	549	chr12	-	105698644	105720795	CTGATCTGGCATGAAGGAGAGAGAAGAGGTGTATGAGTGAAATTCATCTGACAAGAAAAA	intergenic
276	ASHGA5P047166	0.00150692	0.00924745	4.6634	ENST00000456581	RP11-500G10.1	GENCODE	2843	chr10	-	131864637	131909081	GGGCAAAAGGTCTAAAGAGCAATTTCTAAAGGTTCCTTTGTGTCTAAGATTCTGGGTCTT	intergenic
277	ASHGA5P019689	8.62338e-06	0.000187932	4.66282	ENST00000552990	RP11-493L12.2	GENCODE	654	chr12	-	47599683	47610227	ACATGAAATGACCCTTGGCTCTTATTGTTCTTGCTGGTGTGGTATGTTCACGGCTGAAAA	natural antisense
278	ASHGA5P046475	0.00557266	0.0251342	4.65139	ENST00000441146	GK-IT1	GENCODE	397	chrX	+	30689751	30690283	TGTTTGCCTGTCACTGGGCTCAAGGAATTACAAAGTATAAAGAGTTACAGTAGCAATTCC	intron sense-overlapping
279	ASHGA5P036622	0.000570699	0.00447145	4.64259	TCONS_00026436	XLOC_012784	LincRNAs identified by Cabili et al	2402	chr18	-	15301223	15304781	TAACTTTATTTCATCAATATTACTTTTAATATCCCTTCGATTTAGTATGTATTATTCAGA	intergenic
280	ASHGA5P056215	1.29084e-06	4.7843e-05	4.63903	TCONS_00001088	XLOC_000332	LincRNAs identified by Cabili et al	360	chr1	+	108593041	108594976	TACCTGCTGTGGGGAGGAGGCATTGGGAATTAGTGTTAAACAAGACACAAAATGTGTGCT	intergenic
281	ASHGA5P058196	0.00325919	0.0166714	4.63894	TCONS_00028118	XLOC_013474	LincRNAs identified by Cabili et al	301	chr20	+	19029906	19031200	CCCATGACTGCAATGAGAATGAACAAAATGAACAACCTGCAGCAACATGAATGGACCTCA	intergenic
282	ASHGA5P045834	0.000257616	0.002433	4.63707	ENST00000425090	RP11-526D8.7	GENCODE	461	chr9	+	95646192	95661890	GTGTGTAAGAAAAAGATACTGAACGTAGTATCTACTAACCCAATAATGAAAAGGAATGCC	intergenic
283	ASHGA5P040846	2.76644e-06	8.4208e-05	4.63399	TCONS_00021754	XLOC_010348	LincRNAs identified by Cabili et al	459	chr13	+	38052746	38064928	TTCCACGCTGTCTGAAGATCCTCCTTGAAATCCCATGTAACCTTTAGTATAATGCCCACG	intergenic
284	ASHGA5P031287	1.93735e-06	6.4414e-05	4.62999	ENST00000568137	AC009120.4	GENCODE	966	chr16	-	74226290	74249420	CACCTCGCTATAGGGACAAGAAAGGAAGAGAGAGAGAGAACATTTCTGAAGTAATAGTGA	intergenic
285	ASHGA5P031944	0.00157374	0.0095225	4.62703	ENST00000568362	RP11-303E16.6	GENCODE	263	chr16	+	81103458	81110203	CAACTCACATTAATGAATTCACTAAGTACCTAGCACTGAGAATAAAAAGCTAAAGCAGCA	intronic antisense
286	ASHGA5P027761	0.000303425	0.00275585	4.60617	ENST00000544842	RP11-319E16.2	GENCODE	3387	chr12	+	5425126	5428513	AAGTTTCTTTTGTGTCCTTTATATCCCCCTAACAACAGGGAAGTTTTATCAGTAAATGCC	intergenic
287	ASHGA5P043525	0.000362842	0.00318118	4.60086	ENST00000437088	AC011891.5	GENCODE	432	chr7	+	12693803	12694610	TATGGCAGTGTAACCTGTACTAATAAATATAGTGCTAGTCCTGCATGCAACAAAAATGAT	intergenic
288	ASHGA5P049725	8.93868e-07	3.6913e-05	4.59449	ENST00000504972	HOXB-AS1	GENCODE	680	chr17	+	46620912	46623449	CGAAAGAGGCTTCCACTCTTTGAAAAAGGTCAGTATTAAGGTGAAAATAAGAAAGAGATT	natural antisense
289	ASHGA5P055367	1.1599e-09	2.47e-07	4.58501	ENST00000552269	RP11-493L12.2	GENCODE	673	chr12	-	47599680	47610191	TGGCTCTTATTGTTCTTGCTGGTGTGGTATGTTCACGGCTGAAAAGATGGTCAGAAGGGG	natural antisense
290	ASHGA5P029451	2.83968e-06	8.5619e-05	4.58061	ENST00000555460	AE000661.50	GENCODE	455	chr14	+	22886825	22887645	TGATTTGTCTGGTGCACCCAACCAGCACTGTGGCCCTGAAAATAAAATGTTAATTACATC	intergenic
291	ASHGA5P032282	0.00523472	0.0239685	4.56317	ENST00000583179	RP11-19P22.5	GENCODE	2110	chr17	-	25988574	25990684	CTGTTCCACTTCCTCTCCTTCCTCATTGAACTCTTTCACTAAAAGGAGAGTGCAAGAGAG	intergenic
292	ASHGA5P055368	0.00281021	0.0149134	4.55759	ENST00000552975	RP11-493L12.2	GENCODE	378	chr12	-	47599723	47610239	TTCTTGCTTTAGGAAGCGGAAGACTAATGACCGAAGCTTCAAGACTTTGACATGTGTGAA	natural antisense
293	ASHGA5P037748	0.000233833	0.00226785	4.54382	AK055084		LincRNAs identified by Khalil et al	2696	chr12	+	117018780	117021477	TTTCTTGAGATAAGACAAGAGTGTTTTCCCAAAGGGCCTTGAGCACCAGAGAGCAGAACT	intergenic
294	ASHGA5P041677	0.0107122	0.0411084	4.53279	ENST00000453136	RP11-263K19.4	GENCODE	912	chr1	+	155168374	155175286	CCTATCCCTAATTCTACTATGTGGCTCTCAACACCTTGTATTTAATAGGTACACAATAAA	natural antisense
295	ASHGA5P058220	0.0088984	0.0358007	4.5306	TCONS_00028268	XLOC_013612	LincRNAs identified by Cabili et al	1268	chr20	+	62033152	62034595	CCCTCCACCAGGTCCACAAGCCCTGTGAACCATCCCTCTCACACCACGTCTGCCGGGCAC	intergenic
296	ASHGA5P033021	0.00138702	0.00867604	4.52138	TCONS_00029141	XLOC_014082	LincRNAs identified by Cabili et al	2751	chr21	-	40447035	40450266	ACCACCGTTTGCACAAGCCTAACCCTTCTTGATCAAAGACAAATCAAAATCCCAAGGAGA	intergenic
297	ASHGA5P028490	7.52867e-06	0.000174329	4.50164	TCONS_00011106	XLOC_005110	LincRNAs identified by Cabili et al	2092	chr5	-	180253879	180258941	AGTTTGAGAACCTCTACATTACCTACACCAAGCCTTCCCCAGCACTCAATTTATGGAAGA	intergenic
298	ASHGA5P050500	0.000624222	0.00478297	4.49948	ENST00000457602	AC097495.2	GENCODE	574	chr2	+	69062135	69064856	CTACTCTATTGGTATCAGGTTGCATTCTGTATCATCATTAAAATTTTCAGAAAAACTCTC	intergenic
299	ASHGA5P056199	2.35084e-06	7.4169e-05	4.49484	TCONS_00000959	XLOC_000218	LincRNAs identified by Cabili et al	297	chr1	+	59180599	59181440	TTCATCCATCCTGCAGCTTCTACATTGTTCTTCATCTCTGGGAAATCAGTGACCCATGGA	intergenic
300	ASHGA5P015208	0.000799461	0.00572741	4.48975	ENST00000417930	AC092580.4	GENCODE	243	chr2	+	7865931	7870836	TTGTTCTCAGAGGTCTGGACCAAAGAGAAACAAGAAAAGCTGGAGTCACACTACCAAAGG	intergenic
301	ASHGA5P038828	0.0029266	0.0154077	4.4785	ENST00000513638	GBP1P1	GENCODE	1234	chr1	+	89873237	89890493	TCACACAGCTAGTAAATGTATCAAAGCTGTCTTCATCACTTAGTGGAATCCACAATGATT	intergenic
302	ASHGA5P032622	0.00123353	0.00793413	4.47603	NR_036534	KCNJ2-AS1	RefSeq	2442	chr17	-	68163101	68165543	CATGTCCCTATTAGGAAAATTCTGTGTGCCAATGCTTTCAGTGTTTGATTTAATACATCT	natural antisense
303	ASHGA5P044077	1.40494e-05	0.000272314	4.47255	ENST00000517807	RP5-991O23.1	GENCODE	3059	chr8	-	5363589	5366648	ACTTGTGAGGAGAATAAAAATTTCCATTTAAGAAAAATTAGAGAAGCAGAGAGAGAGAAT	intergenic
304	ASHGA5P030582	7.83585e-06	0.000178551	4.47252	uc002ahe.3	BC028842	UCSC_knowngene	610	chr15	+	62352737	62353471	CTCTAAGATTCGCTTTTAATTCACTAGCCACTAACCAGTTACCTATCTCATTACAGATAT	bidirectional
305	ASHGA5P026350	1.94431e-06	6.4481e-05	4.47159	ENST00000533793	RP11-702F3.3	GENCODE	941	chr11	+	46193497	46198656	TTCCCCAAAGGTGTTTATGAATCCAAAATCTGAGAGAGAGAAGACAAGATGAAGTCACAG	intergenic
306	ASHGA5P021853	0.00989778	0.0387748	4.46838	ENST00000542490	RP11-551L14.1	GENCODE	1264	chr12	-	31264585	31270405	ATGAAAACCTGAATAAGATAGGACAATAGTTGAAGAAAGAAAAGTCTCTGGTGGAGAAGC	intergenic
307	ASHGA5P041173	9.09456e-08	6.937e-06	4.44363	TCONS_00021223	XLOC_009911	LincRNAs identified by Cabili et al	541	chr12	+	121342904	121345743	AAGTGAATCTGGAGCTTAGATGGAGAGAGAAGAGAGAGATTAATTGAGGCCCCAGGTACT	intergenic
308	ASHGA5P023107	1.64122e-05	0.000305332	4.43407	ENST00000570077	RP11-299H22.3	GENCODE	1311	chr15	-	62537905	62540994	GCTTCAACAGGTGATGGAGTGGCTGAAGTATCTGCAAATGGAGAGAGAGCAGTATGCCGA	intergenic
309	ASHGA5P030396	0.000200473	0.00203235	4.43331	TCONS_00009190	XLOC_004205	LincRNAs identified by Cabili et al	865	chr4	-	185289387	185303530	GCTGTATCTCCTTCATTTCATCAAGAAATTCTTAAAATTCTCCCCCAACGTGCTTTCATC	intergenic
310	ASHGA5P023499	4.95185e-06	0.000128937	4.43304	uc002gxc.1	AK127974	UCSC_knowngene	2333	chr17	-	20422624	20432000	AAGGTCCAATGTGGGTGCAGAGAGTCTTTGTGTGCAGAGAGAGGGGCTGAACTGCGAGCT	intergenic
311	ASHGA5P045259	0.011074	0.0422096	4.43247	ENST00000424682	RP11-58A12.2	GENCODE	2425	chr9	-	69175691	69178315	CCCACTGATATTGTTTTTAATGCAGCGTGGGAGGGGAGGATATGACACGCGATATCGCAG	intergenic
312	ASHGA5P055909	4.16586e-08	3.778e-06	4.42773	NR_040448	SLC7A7	RefSeq	2566	chr14	-	23242431	23285101	TCCTCCCTTTCTTAAATGCTTGGGGTGAGAGAGAAGAGAGGCTAGGGTGGGGCATGGAGG	exon sense-overlapping
313	ASHGA5P028090	0.0364619	0.102895	4.4246	NR_046223	ARHGEF25	RefSeq	2593	chr12	+	58005217	58011028	AGAGTGAGCCCTTGGAGAGAGAGGCTGAGCATCATGAAGAGAAGACCCTGGGAGTTCCCT	exon sense-overlapping
314	ASHGA5P026306	0.01652	0.0568955	4.41509	ENST00000510619	RP1-68D18.2	GENCODE	704	chr11	+	35234096	35235554	GGTGCCTTCATAATGGATAACTGTAGCCATTTTATGTAAGCATTGTCCTGTGATTAAAAA	intron sense-overlapping
315	ASHGA5P056141	6.70596e-06	0.00016103	4.40603	TCONS_00027001	XLOC_013049	LincRNAs identified by Cabili et al	483	chr19	+	35695954	35706795	CAAAACTCAAACCCTGGACTCTCAATGTATTGGCTCTCAGTTCCAAGACCCAATAAATTC	intergenic
316	ASHGA5P040780	4.0946e-05	0.00060708	4.39881	ENST00000417986	RP11-277L2.2	GENCODE	324	chr1	+	149575481	149615903	AATGTGCCAGTTGATTCTGACAATTTCTCATGAACAGAAACACCTAGGAAGGGAGAACTG	intergenic
317	ASHGA5P032033	4.44006e-05	0.00064763	4.38013	ENST00000565757	FAM157C	GENCODE	491	chr16	+	90168688	90172783	GTCCTGAAGACACCCGGTTCTCATGCTCTTCTCTGCAGCATCTGAATTGGGCATTCCTGG	intergenic
318	ASHGA5P021195	1.8412e-05	0.00033252	4.36723	ENST00000527617	RP11-693N9.2	GENCODE	768	chr11	-	104777284	104788874	TGACAGCCAGGCAAACCATGGGGAACAGTGGGTCAGAGACTGTCCAGCATCTTTGGGAGT	intergenic
319	ASHGA5P016023	0.00152263	0.00930187	4.34172	uc002zxk.4	GUSBP11	UCSC_knowngene	2595	chr22	-	23980674	24051428	ACTGTTTTAGGTCAGCCCAAGACTACCCCGTCGGTCATTCTGTTCCTGCCGTCCTGTGAG	natural antisense
320	ASHGA5P043463	1.15033e-08	1.522e-06	4.33071	ENST00000429872	AC147651.4	GENCODE	731	chr7	+	642821	648119	AAGATCCAGACAGCCCTGACCCTCCTGATTCCAGGGTCCATAAATAAGTCATTCTTAAAA	intronic antisense
321	ASHGA5P058526	0.00152076	0.00930187	4.30718	uc009xzb.3	CASC2	UCSC_knowngene	2333	chr10	+	119806331	119859647	CTTCCCCAAGGAAAATTAAGGAAGTTTTTCAAAGAACCCTATTCCGAGTAAGAAGTGTGT	bidirectional
322	ASHGA5P015048	0.00019903	0.002021	4.30478	ENST00000415982	RP13-131K19.1	GENCODE	520	chr3	-	49017350	49021418	TACTGCCACGGGCACAGAAGAAGAAGAAAACCACAGGAGTCCCATGAAGGTGCAGAGGTC	natural antisense
323	ASHGA5P041765	0.0410433	0.112233	4.30369	ENST00000412143	PSORS1C3	GENCODE	593	chr6	-	31141511	31145676	CAGTGCTCTGTGAAGGGTCTTGACATTGCACTGTAATAATAAAGGTGTGTGTGAAGTATC	intron sense-overlapping
324	ASHGA5P013553	5.15024e-08	4.587e-06	4.29985	ENST00000394662	GBP1P1	pseudogene	1740	chr1	+	89875877	89891802	GAGAGATTTCTACAGATATAAATGAAATAGATATGGTTCCTGTCCTAATGTTGCTTGGGG
325	ASHGA5P032424	7.50574e-08	6.045e-06	4.29734	ENST00000458343	KRT42P	pseudogene	671	chr17	-	39784138	39786844	GAGATGCAGATTGAGAACCTCAAGGAGGACCTGGTCTACCTGAAGAAGAACCACAAGCAG
326	ASHGA5P039863	0.00322368	0.016555	4.2733	ENST00000510905	RP11-302F12.10	GENCODE	483	chr4	+	25771887	25775199	AAGAGATGTCTAAAAAGGCATGTGAGATCCATAGAAACACTGAACAGAAATCTACCTCTG	intronic antisense
327	ASHGA5P018847	0.000108415	0.00128856	4.26818	ENST00000458253	AC018730.1	GENCODE	747	chr2	-	105424034	105467916	AAACCTAACCCTGGAAGTTTGCTCGCTAAATTGCAGAGGGTCCCAGTTTCATTCATTCTC	intergenic
328	ASHGA5P037288	7.19347e-08	5.904e-06	4.26664	NR_038974	LOC100288432	RefSeq	474	chr21	-	34637936	34638565	CAATGGAAGACAACTCAAGACCACACCAAGTTTGTATTAAAAAAGTACTGTTGTGTTACT	intronic antisense
329	ASHGA5P042081	0.000631209	0.00482031	4.26549	ENST00000431144	RP11-356I2.4	GENCODE	777	chr6	-	138178836	138182628	GTGTGTTCCTGAGAAAGACTAAACCAGTTATTTTCTCCTTTCATGTTTGAATGAATAACC	intergenic
330	ASHGA5P042284	1.73781e-05	0.000318469	4.23955	TCONS_00020843	XLOC_010128	LincRNAs identified by Cabili et al	1401	chr12	-	72647333	72649521	TGACTGACACCTGGCTTTCCACCAAGACTCAATTTTCATAGCAAGCCTCATCATCATAAG	intergenic
331	ASHGA5P021698	0.0120644	0.0449281	4.23616	uc001tfa.1	RMST	UCSC_knowngene	1374	chr12	+	97887668	97958793	TCCAAAAAAGATGTTAGTCTAAAACAGCACCTTGGATCTAAGCAGCACCTTTGAGAAAGA	intergenic
332	ASHGA5P034647	0.0121446	0.0451771	4.23291	TCONS_00002901	XLOC_001489	LincRNAs identified by Cabili et al	2828	chr2	+	61159962	61163467	GATACACTGAAATGAAAGTCTCTAAGAGAAAATGTCTTCCTTAGGACAAGAAGGGATAAT	intergenic
333	ASHGA5P029653	0.0132349	0.0482748	4.20664	TCONS_00008931	XLOC_003775	LincRNAs identified by Cabili et al	345	chr4	+	171147755	171194975	AGGAAGGAAGTGGTGGTACATTTGCAGAAGGCACTAAATTAAGCGACTCTAATGAACCAG	intergenic
334	ASHGA5P042361	1.14747e-07	8.266e-06	4.19535	uc021yup.1	PMSP	UCSC_knowngene	1858	chr6	+	31431623	31433481	TGCTTGGTTGTTCAGGGCCATTTCAGGTTTGGGTGTTTTCTGGGGATGTTAACATGGGAT	intergenic
335	ASHGA5P019973	0.00311737	0.0161692	4.19531	ENST00000506086	RP11-229C3.2	GENCODE	479	chr5	-	74343857	74348668	ACGGTGCTAGAACAACAAACCAGAAGATTAACAGAGTTGGGGCTAATATAATGCGTTTAA	intergenic
336	ASHGA5P015435	0.000304668	0.00276268	4.1913	ENST00000420210	LINC00426	GENCODE	508	chr13	-	30915495	30941804	TGTCTCAGAGAATGTCCAGTGCTAGGAGACTCATAAGTTGGAGAGAAACGGCCTGATTTA	intergenic
337	ASHGA5P047198	0.000758042	0.00553465	4.18426	NR_037844	LOC100133445	RefSeq	963	chr1	-	2487207	2488450	TAAACTTCCCTTCCGAATAAAACCACCAGAATGCGGTCTGGCCAATTTCAGTCATAGACC	natural antisense
338	ASHGA5P037467	0.0022949	0.0127116	4.17959	ENST00000457157	AP000688.8	GENCODE	811	chr21	+	37377635	37379899	TATAAAAACTGTTCAGCGGTTCGCCAACAAGAAGTGGTAAAGTAGCAAAAATGGGGATGG	intergenic
339	ASHGA5P044082	1.80819e-08	2.075e-06	4.17787	NR_040040	LOC100287015	RefSeq	2408	chr8	-	6261076	6264069	TCCTGGGAGTAAGGAGGACGACGGCCCCTAACCCCTGAATTAGCCTTCTATTTCCATTAG	bidirectional
340	ASHGA5P029216	0.00029746	0.0027144	4.16852	ENST00000556578	RP4-647C14.3	GENCODE	777	chr14	-	73738889	73740789	AGCCCACTGAATAGCTCTTCCTAGACTCCCAAATATTTATTGACTGGATAATTAAACATC	natural antisense
341	ASHGA5P019591	0.0055952	0.0252242	4.15384	ENST00000494509	RP11-88H10.3	GENCODE	569	chr3	+	145679541	145681410	TTGGATAATACGTACTGCAGGAACATAGAATTAACAAGCAAAAATCCAGAAGGCAGCAAA	intergenic
342	ASHGA5P043700	6.41985e-08	5.405e-06	4.14799	ENST00000412772	RP11-134P9.3	GENCODE	775	chr1	+	203256279	203257929	GTGGAAAGAGTGAACATATGTGCAGAATGCTTAATAAACGTGATCTCCTTTTATCTTCAA	intergenic
343	ASHGA5P019218	7.22622e-05	0.000953228	4.14635	NR_026587	EFCAB2	RefSeq	3687	chr1	+	245133630	245288530	AAGGACAGGGAAGAGAGATTGGAACAATTATCAGGTCATTAGGATGCTGTCCTACGGAAG	exon sense-overlapping
344	ASHGA5P042862	0.0123626	0.0457104	4.1428	ENST00000480075	AC093627.6	GENCODE	1005	chr7	-	19756	35457	TTTTTCAAAAGTCATGGCGTGTAATTGTCAGAACAGTGAACTTCGGAGATCCACCGGAGG	intergenic
345	ASHGA5P029156	3.39912e-08	3.289e-06	4.12528	ENST00000449024	RP11-403I13.9	GENCODE	537	chr1	-	149305909	149313076	CAACAGAATTCTTGGGTGGGAACTTGGAGGCATTGGATATTATCTTTAAATGAAGAGATC	intergenic
346	ASHGA5P043832	9.9315e-07	3.9871e-05	4.11362	TCONS_00018569	XLOC_008895	LincRNAs identified by Cabili et al	1719	chr10	-	89832453	89840364	AACATCAGCTGAGCTGAGATTTGAACTCCACTCTTTTTGACCCTGGAGCTGATGAATGCT	intergenic
347	ASHGA5P034128	0.000510778	0.0041133	4.09665	TCONS_00004889	XLOC_001676	LincRNAs identified by Cabili et al	598	chr2	+	132301071	132302891	TTGACGGCGACAGCAATTGTATTGGCATTGGTGCTAGTGGTGGTAGTGGCAGCAAGTCTG	intergenic
348	ASHGA5P016947	0.000482062	0.00394288	4.08888	NR_026939	CASC2	RefSeq	3284	chr10	+	119806331	119969665	GAAAAAAAATATGTCTCTGAAAAGCAACTTATTCACTGGAGATGTGAGGAGCCATCCGCA	bidirectional
349	ASHGA5P019499	0.0310857	0.0914861	4.08578	ENST00000488287	RP11-10O22.2	GENCODE	430	chr3	-	162845710	162900698	CTATTTACAGTCTAGAAACAGGAACAAACCCAAACCAAGCAGAAAAACAGAAATAACCAA	intergenic
350	ASHGA5P046560	1.06897e-06	4.2132e-05	4.07138	uc004dwg.1	mir-223	UCSC_knowngene	1815	chrX	+	65235302	65240264	TCCTTTTGAGCTCCTATGTGGGAGGCTCTGGAAAGCTTAGCAACACTTTCCAACAACTTT	intergenic
351	ASHGA5P056039	2.2322e-07	1.3589e-05	4.06303	ENST00000557723	RP11-783L4.1	GENCODE	531	chr14	+	66578348	66592565	CTCAGACAACTTCATCATTCCATATTTGCATCCAAGAGAGAGAAAGAAAAACTACAATCA	intergenic
352	ASHGA5P047517	2.938e-07	1.6241e-05	4.05794	ENST00000429850	RP11-443A13.2	GENCODE	2525	chr10	+	78647801	78663848	CCAAATATTATCTAAGATGTGTGTTCATGAAAGAGAGAAAGAGAGAGGATAAGTGCACAC	intronic antisense
353	ASHGA5P029849	0.00467732	0.0219377	4.05087	ENST00000554452	NBEAP1	pseudogene	979	chr15	-	20862966	20893737	CAAAGGGTCAAAGAAGATGAACTTCAGAGTATATTAAATTACCTTCTTACAATACATGAG
354	ASHGA5P015363	0.00292324	0.0153963	4.02718	ENST00000419640	AC092614.2	GENCODE	909	chr2	-	192093890	192110898	CCCCGGAAACATAAATAACCAGCACCTCTGCCTGCTTTCCTTACTCAAATCTTTGATGAG	intronic antisense
355	ASHGA5P056406	3.42431e-06	9.802e-05	4.02251	TCONS_00003964	XLOC_001780	LincRNAs identified by Cabili et al	557	chr2	+	186031560	186085106	ATTGTAAATTAATGTACCTCCAGAACAGCAGCAACCCTGCAGTGGTAGTAGTGGTGACAG	intergenic
356	ASHGA5P041974	0.00118519	0.00769955	3.99774	ENST00000426737	ARMC2-AS1	GENCODE	112	chr6	-	109244178	109245306	AGGAAGAAGAAAAAAGAGAAGAAAATGACACTGATAATCCACAAAGAGGACTAATACAAA	intronic antisense
357	ASHGA5P045770	0.0138401	0.0499531	3.99364	ENST00000436054	RP11-63P12.6	GENCODE	2078	chr9	+	74920351	74958126	CAGGGGAAGTGTGACTGTAGCTTTAAATAGTTTAAATAGTCCTTCAAATACGGCAAATAA	intergenic
358	ASHGA5P016889	2.66732e-05	0.000434512	3.9898	uc002uns.1	AK125001	UCSC_knowngene	1765	chr2	+	181988563	182264280	CAACTCAGAGTTTCATCCTAAACTGAGAGACCAACATCAAAAGAATCTTCTCAAGTTTCT	intergenic
359	ASHGA5P056210	0.0157372	0.0550164	3.9731	TCONS_00001018	XLOC_000283	LincRNAs identified by Cabili et al	896	chr1	+	89510012	89512879	CTTACACATTGCTGGAGATTTAGAAGCTAAAGAAAGAGGACAAATGATTTGGAAGCAAAG	intergenic
360	ASHGA5P032202	0.00862233	0.0348739	3.96629	ENST00000433873	AC005324.6	GENCODE	484	chr17	-	15641816	15647113	TTCTGGAAGGAAGGAAGGAAGGTTTCCTTCTGCAGAAAGCTCCTTTTTACCTTGTTTCTG	natural antisense
361	ASHGA5P019890	0.0125971	0.0463791	3.96274	ENST00000504735	RP11-166D18.1	GENCODE	539	chr3	+	139556061	139578736	AACATTCACTGCAGGCTCTAACCCAATGACAAGTCTTTAGAAGAGAAGAGAGGGAAAAAT	intergenic
362	ASHGA5P015778	0.0178088	0.0599498	3.96013	ENST00000423428	AC104777.4	GENCODE	554	chr2	+	151485505	151491484	ATTCTTGTTGTATGAGAACTTCTAGCAACTAACCCTGGCATGACCACCAGAATCTGCAGG	intergenic
363	ASHGA5P016657	0.038307	0.106731	3.94998	uc002yjk.3	BC048201	UCSC_knowngene	1073	chr21	+	15399741	15516778	GAGAGAGGAGGGTGTTGTCAATGGAAATATGGATTCTTCTACAGCAAACATGTACATCTA	intronic antisense
364	ASHGA5P027252	0.0128174	0.0469634	3.94089	TCONS_00011744	XLOC_005209	LincRNAs identified by Cabili et al	825	chr6	+	26331952	26340507	ACAGTACAGAAAAGATCACTAGGAGGAGAGAGAATGACTGTGGCATGCCACCTTACTAGA	intergenic
365	ASHGA5P039044	0.0156733	0.0548801	3.93592	ENST00000564660	RP11-13L2.4	GENCODE	5692	chr3	+	140290547	140296239	CAAACTGATTCATGTTGGTGGTCGTTATGACACTTTCTGTGAATTGGTGAATAAATATGA	intergenic
366	ASHGA5P031493	0.00267538	0.0143889	3.93042	ENST00000570700	RP11-473M20.11	GENCODE	302	chr16	+	3156764	3159577	CTCATTCTCAAGAAGAAGTTAATGTCTGCCTTACAGTAGATGTCCAATAAATCTTCTTTG	intergenic
367	ASHGA5P042042	0.0314917	0.0924921	3.92911	TCONS_00021005	XLOC_010266	LincRNAs identified by Cabili et al	1024	chr12	-	131254364	131260323	TTGGGTTTTTGAAGAAAACCTGTAAAAGCTGTAAAACCCGAACCATGAGGACACCCCAGG	intergenic
368	ASHGA5P022991	0.00330856	0.016864	3.92899	ENST00000567227	CTD-2009A10.1	GENCODE	532	chr16	+	73577839	73592421	ACCTAGGAAGCCCACTGAATAACAGGTTTTTTCAAGAGAGAAAGAAAGAAAACAGATCCC	intergenic
369	ASHGA5P046739	8.78744e-06	0.000191186	3.92453	ENST00000417305	ZFY-AS1	GENCODE	500	chrY	-	2834884	2870667	GGAGATTTAAAGGATTCTCAAATACAAACTGAAGTTTTCAAGAACAGGATCATGAAGGAC	natural antisense
370	ASHGA5P042769	2.56902e-05	0.000421144	3.92429	TCONS_00020005	XLOC_009301	LincRNAs identified by Cabili et al	488	chr11	+	119776057	119784117	TGGACATCTTCCAGGCCATTCAATAGCCAAAGAGAACCACCAACAGCTTGAATCAAAAAA	intergenic
371	ASHGA5P045253	0.000206192	0.00206176	3.92417	uc004aej.3	BC065763	UCSC_knowngene	1242	chr9	-	66688085	66699951	CTGAAGAAGAACAGAGCTCAAGAATGTATACCATCAGATGTCTCCAACTTTATTACAATT	intergenic
372	ASHGA5P036150	0.000164586	0.00174471	3.91177	NR_002909	SNHG3	RefSeq	2238	chr1	+	28832454	28837404	CCAGTCCCATCCGTGTCCTGCTGTAACTACATAGATCTCACCTGAGTAAAGTGATTTTTT	exon sense-overlapping
373	ASHGA5P030624	1.85533e-05	0.000334081	3.88608	uc002asg.1	LOC145837	UCSC_knowngene	1256	chr15	+	69760511	69863779	TTTTGCTAAAGGTCTCTGGAAAGCTCCCTGTGTTAATTCTCGATGAGACTACGTCTGTGC	intergenic
374	ASHGA5P057314	0.0219023	0.0702241	3.88128	TCONS_00016034	XLOC_007429	LincRNAs identified by Cabili et al	617	chr9	+	87193531	87199274	GATGCAGGAAGGAAGGAAAACATAGAAATTGAGCCAGTTGGAGTGTGAGGCTTCAGAATC	intergenic
375	ASHGA5P035989	0.00725359	0.0305977	3.86752	ENST00000421951	ANKRD36BP2	GENCODE	1899	chr2	+	89065323	89079082	CCCAAATGCACGTTAAAAACCTCTTACAACATATGTGCACATTCATAGATAACATGTAGA	intergenic
376	ASHGA5P044020	0.00016077	0.00171722	3.84865	ENST00000489632	RP4-555L14.5	GENCODE	751	chr7	+	151106246	151110440	GCACAGTGTGGAAGAACTCAACTTTTTAAAGACAGAGATCAGCTTTAAATATTGCTAAGA	intronic antisense
377	ASHGA5P028937	0.0472196	0.124413	3.83692	ENST00000440735	RP11-365P13.3	GENCODE	684	chr13	+	111635653	111642911	CCCAAAAGATACCATAATTTGCTGAGGCTTCTGAATCTTAAGTGCTCTAAGTTATAACTT	intergenic
378	ASHGA5P023590	0.0121748	0.0451964	3.82247	ENST00000585088	RP11-930P14.1	GENCODE	548	chr8	+	41518803	41521504	TGGAGAGAGAGCTCATAAAGAGCAGGAAACCCGGCTCAGCATGTAGCAGGAGCCATGCCA	intronic antisense
379	ASHGA5P029073	0.0456297	0.12147	3.81035	ENST00000548096	CTD-2213F21.3	GENCODE	288	chr14	-	32027712	32030540	AGATAAAGCCAATGCAAGAGAGAAGAAGAAAGTAGATCATAAGAGATCATGTTACCATAG	intronic antisense
380	ASHGA5P037584	0.0243003	0.0760015	3.80057	uc002zuo.1	AX748067	UCSC_knowngene	1842	chr22	-	21642518	21646214	CCTCTGCCTCTCTCCTGGTGGTGGCGTTGAAACAGCACCCTCTGCTTCGGTCCTCTACAG	natural antisense
381	ASHGA5P023302	0.000273139	0.00254439	3.79519	ENST00000577841	RP11-344E13.3	GENCODE	634	chr17	+	20824464	20833359	AAGAAAAGAGCAAAAACAACAGACCTTCATTCAGCTTAGGAACATAATAAATAGGACGAA	intergenic
382	ASHGA5P039829	0.0116811	0.0438533	3.78721	ENST00000510095	RP11-281P23.2	GENCODE	555	chr4	+	11627337	11815582	GCCTAGGATGTAGAAAAATTACTAATTGTTTTCCTATGTCCCACGTAAAATACCAAACAG	intergenic
383	ASHGA5P038822	0.000260756	0.00245371	3.7754	ENST00000437128	RP4-620F22.2	GENCODE	324	chr1	+	89726264	89735437	CCCATATTTAGCACTTTAGAGTAAAACACATGGATCATCGTTATTAACAGTCCTCTGGGC	natural antisense
384	ASHGA5P055580	0.00485669	0.0225966	3.76431	ENST00000547946	RMST	GENCODE	687	chr12	+	97958126	97958813	CTTCCTTCAGATGTTAGTCTAAAACAGCACCTTGGATCTAAGCAGCACCTTTGAGAAAGA	intergenic
385	ASHGA5P042476	0.0076896	0.03201	3.75923	ENST00000562834	RP3-523K23.2	GENCODE	1933	chr6	+	54807964	54809897	GGGATGCAAAGTAGAATTGCTTTACATTGACTATATATGTGACATGTACGTTGCTGTTTT	intergenic
386	ASHGA5P034832	0.019856	0.0652401	3.75788	ENST00000456949	AC116614.1	GENCODE	532	chr2	-	945319	945960	CCCTATCTAGGAGCAGAATGTGACGCATTGTAAACAAATAAATATTGAAAACTCGATGTT	bidirectional
387	ASHGA5P031757	0.000296967	0.00271372	3.75728	ENST00000563424	RP11-401P9.4	GENCODE	3441	chr16	+	50679719	50683160	TTTAAAGATGGTGGCAGTGAAACTGGTACATGGGACCTGACTGGGCTTTGTTTGCAACTT	intergenic
388	ASHGA5P027502	0.0413845	0.112833	3.74377	ENST00000551323	RP11-410A13.3	GENCODE	235	chr12	-	96081094	96358916	TTTTTTCACCAAATTATTTTTACATGGAATGTCTCAAACAGATTTAAGGCTGCAAACTTG	intron sense-overlapping
389	ASHGA5P031448	0.00150345	0.00923116	3.73435	ENST00000563610	LA16c-390E6.4	GENCODE	570	chr16	+	1501760	1502654	TCAGCAGACACCTGGCCTCCTCTGAGATCTGGGTGGACAGGACTAACCCTCTTTGAGACA	intronic antisense
390	ASHGA5P013534	0.000171557	0.00180421	3.72677	ENST00000456409	RP11-465B22.3	GENCODE	750	chr1	+	998458	1001836	GAGAGCAGCCCGGGGGGCTTCACGCTGTCCGTCAGGTAGCTGAAGCAGAGAGAGAAGGCG	intergenic
391	ASHGA5P016209	1.32204e-07	9.011e-06	3.71789	ENST00000427995	TMEM106A-AS1	GENCODE	912	chr17	-	41368959	41376546	GGAATAAAATCCAGGTACAGATTTTGCTGAGAGAGAAGAAAAGAGAACGTGGGACCACGT	natural antisense
392	ASHGA5P039092	0.000165001	0.00174659	3.71235	ENST00000469268	RP11-166N6.2	GENCODE	565	chr3	+	150608422	150756605	CAAAAGCAGGAGACACCAACCTCACACCATCAACAGCAATGGCATTTCTGTGTTATTTGT	intronic antisense
393	ASHGA5P014659	2.37633e-05	0.000399662	3.70676	ENST00000412228	RP1-140A9.1	GENCODE	906	chr1	+	1822909	1824097	AGACCTCCAGGCCTGCACCAGCACAGCTGAAGGGGAGAGAGACCCAACCTCATCCACTGG	bidirectional
394	ASHGA5P029699	0.00113785	0.00747174	3.69382	TCONS_00008950	XLOC_003805	LincRNAs identified by Cabili et al	289	chr4	+	185193149	185195410	GTCCATATCTGGCATAAATGAATGTGAGTGGTCTTGGGAATCTAAATATAACATGTTTCT	intergenic
395	ASHGA5P021210	0.000827732	0.00586194	3.6905	ENST00000528437	RP11-693N9.2	GENCODE	586	chr11	-	104772275	104788872	GACAGCCAGGATAACGTGTCCAGGAGAGACAGCACAAGGGGCTCCATCTTCATCACACAA	intergenic
396	ASHGA5P053209	0.0251006	0.0777542	3.68241	ENST00000425474	AZGP1P1	GENCODE	1181	chr7	+	99578384	99581860	ATGGAGACCCTGAACAACATCATGGAGTATTACAACGACGGTAACGGTCAGTGAACAACA	intergenic
397	ASHGA5P051177	0.000932982	0.00642143	3.67822	ENST00000338526	ANKRD62P1	GENCODE	1496	chr22	-	17154450	17160374	AAGAAAGACAATGCCAATATGAAAAAGAGAAAGAAAAAGGAGAAGTAAGTATCAAGAAAA	intergenic
398	ASHGA5P049621	0.000667095	0.00502628	3.6711	TCONS_00019370	XLOC_009194	LincRNAs identified by Cabili et al	2868	chr11	+	69300568	69308547	TACAAACTCATCTGGAAGCATTAAAACAATGGAAGCAGGTGAGAGCAGAGAGATCCCGAG	intergenic
399	ASHGA5P040094	0.00624065	0.0272926	3.6688	ENST00000457996	RP11-439A17.9	GENCODE	3543	chr1	+	120925633	120933000	GAGTGGGAAATTGTAACATACCTCCATCAGATACTGTTGAACATTAGTAATGGTAGAAAA	intronic antisense
400	ASHGA5P026626	0.0169886	0.0580302	3.66337	ENST00000565433	RP11-800A3.4	GENCODE	3361	chr11	+	72950019	72953380	CTTTGTGACCAAAGCAATTGTAAAACGTGGGGGAGGAAATTAAAAGCCTGCCACCTTAGT	intergenic
401	ASHGA5P055116	0.0014876	0.00916376	3.65763	ENST00000532510	RP11-693N9.2	GENCODE	3530	chr11	-	104772275	104779432	GGGGAACACTGGTTAGTATTTCACTTCTAGGTAATTATCTTAAGGAGTATACATTTAACC	intergenic
402	ASHGA5P047577	9.47644e-05	0.0011703	3.65672	ENST00000562983	RP11-399O19.8	GENCODE	1224	chr10	+	90775592	90776816	GTCTTCTGACCTCTGATTAGATCAGACACTTTTTAGATATTGAATCATCAGTTTCTGTAC	intergenic
403	ASHGA5P027058	0.00272486	0.0145945	3.6564	TCONS_00012378	XLOC_005946	LincRNAs identified by Cabili et al	908	chr6	-	170481453	170492362	GGTTTCAGAATTTCTCTTAAAGACAACATCATATTGTGACCCCAAAGCATTCGATAGAAA	intergenic
404	ASHGA5P029159	0.00427114	0.0204519	3.65273	ENST00000415338	RP5-998N21.4	GENCODE	3540	chr1	-	149372291	149379646	GTGGGAAATTGTAACATACCTCCATCAGATACTGTCGAACATTAGTAATGGTAGAAAATA	intergenic
405	ASHGA5P041990	5.00731e-06	0.00013012	3.6476	ENST00000452675	RP11-367G18.1	GENCODE	465	chr6	-	113944980	113953716	GAGGACAACAGTATAATGATTCATAGGTTCTACTTCCTGGCAAGTAATCATTTTCCCACG	intergenic
406	ASHGA5P052329	0.000765816	0.0055601	3.64461	ENST00000513626	RP11-213H15.3	GENCODE	2672	chr5	-	90606837	90610219	CTGTCCTCATCTCCCAATGAAAAGGTATTGTAAATAAAGAGAAAGATCAGAGGCTTATTT	intergenic
407	ASHGA5P029188	0.0141649	0.05088	3.63891	NR_046320	GPX2	RefSeq	1311	chr14	-	65405869	65409623	AACTGCTCAGGGTAGACTGGAGACAAAAGCAACAGCTCAGAAGTGCTAAATCTTGAAGAG	exon sense-overlapping
408	ASHGA5P016035	0.0269898	0.0820964	3.63752	ENST00000426066	LL22NC03-80A10.6	GENCODE	1776	chr22	+	22657588	22677203	AACTCTAAGACTCACACAGTGCTCCAGACCCATGAGGAACAAAACACTGCAAAGTCATTC	intergenic
409	ASHGA5P057062	6.76129e-07	3.0232e-05	3.63198	TCONS_00012412	XLOC_005155	LincRNAs identified by Cabili et al	345	chr6	+	7439354	7453025	TCCCACATCAGCCTCGTAGGCTCCAGAGAGAGACAAGGAGATGAGGAGACAAGCAGACGA	intergenic
410	ASHGA5P035445	0.0111083	0.0422622	3.62753	NR_038435	HOXD-AS2	RefSeq	692	chr2	-	176999568	177001826	GACACAAGAAGCTTGGATGTGAAATAGCACTTCCTTCTGTGTTACAGAATAAAACAATAT	natural antisense
411	ASHGA5P042154	1.18311e-05	0.000239336	3.62544	ENST00000446887	RP1-111C20.3	GENCODE	331	chr6	-	159485759	159486305	ATCTCACTATCAGTTTAGGAAATTCTCTGGTCTTCATGCTGGCTTCTGACCCTTGTGTCG	intergenic
412	ASHGA5P055136	0.00696166	0.029607	3.62283	TCONS_00005969	XLOC_002602	LincRNAs identified by Cabili et al	997	chr3	+	27753780	27755870	TGGTGTCTGACACTCCATCTTAGGAATGCCTTATCATAAGGTGTTAATTGGGGCCACTCA	intergenic
413	ASHGA5P030440	0.000151344	0.0016354	3.61974	ENST00000559992	RP11-1008C21.1	GENCODE	583	chr15	+	38285609	38317219	TACAGAGGAAAGCTTCACATGTGCCTAAAAACTCCCTTCAGATCGTCATCAGCCCGTATT	intergenic
414	ASHGA5P034045	0.0267188	0.0814824	3.60702	TCONS_00004060	XLOC_001908	LincRNAs identified by Cabili et al	303	chr2	+	238121307	238121926	GTAAGGTATGTGGTGTGTGACATATGTGTGATACGTGTGTGGCATCTGTGTAAGGTATGT	intergenic
415	ASHGA5P029178	0.010124	0.0393873	3.60318	ENST00000428289	RP11-196G18.3	GENCODE	3543	chr1	-	149757214	149764576	GAGTGGGAAATTGTAACATACCTCCATCAGATACTGTCAAACATTAGTAATGGTAGAAAA	intron sense-overlapping
416	ASHGA5P043838	0.00226195	0.0125803	3.59957	ENST00000417026	RP11-325F22.2	GENCODE	891	chr7	+	104581652	104602781	ACTGTTACAGAAAGGCAACCCAGGAGGAGACTGGAATAAATGCTGAGTGCCAATTTCCAA	intergenic
417	ASHGA5P016356	0.000332675	0.00297094	3.58553	ENST00000429681	RP13-131K19.1	GENCODE	555	chr3	-	49017364	49021299	TTGCAGTACAGACATTTTGAGGGCACAGAAGAAGAAGAAAACCACAGGAGTCCCATGAAG	natural antisense
418	ASHGA5P057423	5.95466e-05	0.00081278	3.57295	TCONS_00017186	XLOC_007999	LincRNAs identified by Cabili et al	1212	chrX	+	64254713	64272117	GAGAGTAGGGGTGGAAGAAATATGGATATGCTGTATTCTGTTTGAAAGGATTCATCATGA	intergenic
419	ASHGA5P021121	0.0112397	0.0425784	3.5703	ENST00000525636	RP11-540A21.3	GENCODE	638	chr11	+	9797191	9829585	GCTGGTAAATAATAATGCTGTGTGCTCCCTCTTTGCCTGCTACTGAACAATGACGTCTCT	natural antisense
420	ASHGA5P035977	0.00511164	0.0235295	3.56742	ENST00000577528	RP4-594I10.3	GENCODE	1445	chr1	-	24865291	24882515	GATTTTTCTTATTCACTGTTTCCCATCAGGGAAAAAAGAATCCTCCCACCTCATGCCTTT	bidirectional
421	ASHGA5P038023	0.00156804	0.00950574	3.56537	ENST00000420269	Z82214.3	GENCODE	531	chr22	+	43608679	43609667	ATTGAAAAAGGGCTTTCTAAACCGTCTGTGGGGCACATAATAAAGTTCTTTGTGTGGAGC	intronic antisense
422	ASHGA5P032647	0.000255033	0.00241855	3.56086	ENST00000582959	CTD-2006K23.2	GENCODE	523	chr17	-	72668850	72673739	GGGCATGGATTTTTCTGCTAATTTGGATTCTTTTGAGGACAAATTTGCATACCATTATCA	intronic antisense
423	ASHGA5P033811	0.00162528	0.00977053	3.55953	ENST00000582269	RP11-210K20.2	GENCODE	348	chr18	+	29424350	29425141	AATACAAGCTATTTATTTGAGACTTCTAAATTATACTGAATACATTTCTATATACCACCT	intronic antisense
424	ASHGA5P042259	0.000123181	0.00140974	3.55541	ENST00000443928	RP11-404F10.2	GENCODE	791	chr1	+	160643135	160653612	CTGGCTGGTGGAACTTGAATGTATACAACACTCTTCATTTGCATGTTTTGACATTTTAAA	intronic antisense
425	ASHGA5P050279	0.0447723	0.119922	3.54738	uc021uyg.1	GQ868703	UCSC_knowngene	277	chr19	-	51288984	51289467	AAAGAGAGAGAAGACCAACCAAGGGGTGGCTGGAGTCCCAAGGCCATGAACTTTCAGGAA	intergenic
426	ASHGA5P026579	0.0219011	0.0702241	3.52723	ENST00000565145	RP11-554A11.9	GENCODE	500	chr11	+	68923377	68927208	AAACAAGCCCAGAGCTCAACGTTCCCTAAGTGAGTGGCCTTTGACAGCAGTGCCAGGCAG	intergenic
427	ASHGA5P040814	0.0265002	0.0811077	3.50641	ENST00000506723	AC091969.1	GENCODE	2193	chr5	-	151998524	152069089	ATCACATTTTCTGCCTCAAGGGACTGAGCAGCTCCCAATAAGATTTTCCTGAGTGTGTCT	intergenic
428	ASHGA5P043975	7.58755e-08	6.073e-06	3.50365	ENST00000421648	AC092214.10	GENCODE	484	chr7	+	143104925	143112923	CCCATTCCGCACATATCTCATACCAAAGTACAAATAAAACCATTCCCAATTGTTCTAATA	intronic antisense
429	ASHGA5P015600	0.0279203	0.0843136	3.50137	NR_027689	CERKL	RefSeq	3030	chr2	-	182401400	182521834	TCAAGAAAATATTGGCAGTGTTGTCTGTGTTGGTGGAGATGGATCTGCTAGCGAAGTAGC	exon sense-overlapping
430	ASHGA5P029464	0.00572049	0.0256068	3.49919	ENST00000554010	RP11-124D2.3	GENCODE	285	chr14	+	23825614	23826212	GAATAGTTGTTGAAGAAAGGAGTAAAATCTCCCCCAAACCCTAAAGGCATCCTTTTCGTA	natural antisense
431	ASHGA5P044292	0.00150318	0.00923116	3.47138	NR_034003	LOC100130298	RefSeq	528	chr8	-	61878679	61880307	TTCACATCTCCAAAGGTCCTCTACCTTAGAAGAAGAAAGAAAGAGGGAAAGAGAAATAAA	intergenic
432	ASHGA5P033993	7.46748e-06	0.000173532	3.47064	ENST00000569838	EMR4P	GENCODE	2732	chr19	-	6952510	6990857	CACTCCACATTCACATAATTCAACAATTTTCATATGGATCAGTATTAAAGAGGGTGTTGC	intergenic
433	ASHGA5P048957	0.00115366	0.00754865	3.45695	TCONS_00025221	XLOC_012444	LincRNAs identified by Cabili et al	2022	chr17	-	33558468	33569346	GGTGTTTCTCCTGAGAAAATTCTTGCATGTTTAAACCCAATTTGAGGGATTATTGGGAAA	intergenic
434	ASHGA5P035180	0.00026777	0.00250518	3.45385	ENST00000448595	AC109826.2	GENCODE	548	chr2	-	99385423	99388543	GAAGGCTGAAAAACAGCTGTTAAAATGGCTTGTTTGTTTGAAGATGAATGAGAGTACACA	intergenic
435	ASHGA5P042072	0.0128212	0.046964	3.4488	ENST00000564248	RP3-406A7.7	GENCODE	374	chr6	-	136656851	136657225	ACAGACCTTCTGTACCGTGTCCATTTCCATATAATCTAATAAATCCTTCTTACAAAGGAA	intergenic
436	ASHGA5P048617	0.00181951	0.0106517	3.4457	ENST00000558963	RP11-475A13.1	GENCODE	3042	chr15	-	36731172	36736713	TTTATTACAGAATCAAATAGTGTAAATAGATCCACAGAAGAAGAAGTATAATGAACCTGA	intergenic
437	ASHGA5P022837	0.000762066	0.00554841	3.44292	ENST00000563806	AC009133.14	GENCODE	494	chr16	-	29819969	29821028	CAGTTAACCGGAATCTAGACGCCACGAGCTCTTGGCTACAGCACCCTTAACCCGTATCCG	natural antisense
438	ASHGA5P022043	0.0111244	0.042302	3.44078	ENST00000547777	RP11-493L12.4	GENCODE	329	chr12	+	47641906	47643068	CTTCAAACAGAACCAGAAATTATGGTGCTACAAAAATACCTGCTTATCTTAGAGCCAAAA	intergenic
439	ASHGA5P015456	0.0176074	0.0595255	3.42952	ENST00000420406	RP4-740C4.4	GENCODE	371	chr1	+	2357418	2362089	TTCTGTTCTCCCTGGCTCCCTGCACGGAACTGAGCTTTGGTGTGTGATGCGCTGCTGGCC	intergenic
440	ASHGA5P055253	0.000107148	0.00127467	3.42473	ENST00000537149	RP11-664D1.1	GENCODE	678	chr12	+	3980899	4019504	GGGCCCTGGAGGATATTGTCTTATACAGTCCACTGGGTTTTGGATATGCAGTCTGTGCCT	intronic antisense
441	ASHGA5P023455	0.0094174	0.037367	3.4221	ENST00000581274	RP11-370A5.1	GENCODE	381	chr18	-	20303455	20366836	AATAAATCAGAGATGGCCTGGATTCTGCCATGTAAATCAAAGAAGAGAGGGCCTAACTCA	intergenic
442	ASHGA5P036749	0.000347188	0.00308144	3.39764	TCONS_00026542	XLOC_012863	LincRNAs identified by Cabili et al	226	chr18	-	59568317	59577618	CCTGATAGCCAATGGAAAGGAAAGATAAGGAGGACAGTTGGAACCGCATGGGTGACAGAA	intergenic
443	ASHGA5P057880	0.0442614	0.118926	3.39738	TCONS_00023132	XLOC_011074	LincRNAs identified by Cabili et al	608	chr14	-	74675158	74681460	AGCTCTCGCCTTGGCTCTCAATCATTAATGAAGATGTGAAGTGAGACACCAATCCTCACA	intergenic
444	ASHGA5P053289	0.00109281	0.00724093	3.39587	NR_029467	SELL	RefSeq	2206	chr1	-	169659805	169677997	TGTCTTGCAGATTTCCTGGCACATCATGGAACCGACTGCTGGACTTACCATTATTCTGAA	exon sense-overlapping
445	ASHGA5P056676	9.00181e-06	0.000193898	3.39566	TCONS_00007119	XLOC_003052	LincRNAs identified by Cabili et al	432	chr3	-	13691938	13693351	TGTCTGTAAAACGGGGATCATCATGGAAGGAAGGAAGAGTTTAGTGAGGTCCTGAAAGCT	intergenic
446	ASHGA5P031996	0.00106406	0.00710234	3.39553	ENST00000567968	RP5-1142A6.2	GENCODE	4521	chr16	+	88803207	88807826	TTGCAAAATGGAAAATCAAGGGTTAGGGTAAAGAAAGAAAGTAGCCAGAAAGAGCCCCCA	natural antisense
447	ASHGA5P043834	3.78178e-05	0.000570877	3.39134	ENST00000420058	RP11-645N11.2	GENCODE	1072	chr7	+	102613968	102629303	GGCTGCTTATCCCACTGATTCTGATCTGACTGTGTTAAGTAATAAATCATGTGGTTACAT	intronic antisense
448	ASHGA5P053898	0.0175089	0.0593407	3.39018	ENST00000446912	FAM157B	GENCODE	1836	chr9	+	141107517	141149300	AAAGTCATGGCGTGTAATTGTCCGAACAGTGAACTTCGGAGATCCACCGGAGGGGCGAGG	exon sense-overlapping
449	ASHGA5P036396	0.0310708	0.0914633	3.38936	TCONS_00026334	XLOC_012681	LincRNAs identified by Cabili et al	1040	chr18	+	52559874	52562337	TCTGTCTCTTCACCAGTGGAGTGAGTGCAGCAGTTAGAAAGAGAAGCAATATTGTGCAAC	exon sense-overlapping
450	ASHGA5P043281	0.000146856	0.0016004	3.38431	TCONS_00019584	XLOC_009382	LincRNAs identified by Cabili et al	386	chr11	-	15932519	15933620	TGTTGAATTCCTTAAGGTGTCTGGAAAAAGAGAGAGAGAGAGCCAAAGAGGAAGAGGGGA	intergenic
451	ASHGA5P035707	0.00101782	0.00688119	3.38298	ENST00000478468	RP11-521D12.1	GENCODE	832	chr2	+	9778900	9789568	AAGAGCTTTCTGCATAAGAGAGAGCAAGAGAGATAAATAAACCCACATCTTCCTCTGAAA	intergenic
452	ASHGA5P028006	0.000886888	0.00619627	3.37818	ENST00000546981	OR7E5P	GENCODE	933	chr12	+	52487352	52502034	AGCCTAAAGGCCTGACTTGCTGTCTCTGCTGGGAAGTTGGCTGTATTGGCCGAGAGACTG	intergenic
453	ASHGA5P054251	0.000118113	0.0013656	3.37724	ENST00000522600	RP11-1149O23.3	GENCODE	632	chr8	+	23083146	23085720	ATTCTGCCTTTCTTCTGGATTTTCCTAACCTGTTAAGAGTCTTGAAAGTCCTTAAACCAC	bidirectional
454	ASHGA5P058348	0.0128366	0.0469937	3.37489	uc001mia.1	BC073899	UCSC_knowngene	354	chr11	+	9780544	9801489	GAGCTCAGAGAATAATGCTGTGTGCTCCCTCTTTGCCTGCTACTGAACAATGACGTCTCT	natural antisense
455	ASHGA5P045811	0.0112056	0.042511	3.37384	NR_024280	UNQ6494	RefSeq	2194	chr9	+	92254697	92334674	GGCGCTGCTTAAACTGCAGATGTATGAACAAAATAAAAATGGTGGTTATTTTAAGACACT	intergenic
456	ASHGA5P052651	1.04267e-05	0.000216325	3.3678	NR_040662	HCP5	RefSeq	2547	chr6	+	31430956	31433586	ATTCTATAGTATATCCAGGTTCTCCAGATCTCTTAAGACTGTACTATAGAGGCCTGGGGA	intergenic
457	ASHGA5P057687	0.0173214	0.058859	3.36543	TCONS_00020732	XLOC_010031	LincRNAs identified by Cabili et al	751	chr12	-	25537424	25539101	AGAAGACAGAAGAGACCCAAATTGCAACGATAAGCAAACAGACTCTGAGGATCCGTGTGT	intergenic
458	ASHGA5P036093	6.13286e-05	0.00083185	3.3635	ENST00000422178	AC016745.3	GENCODE	508	chr2	+	114182071	114182901	GTCCACTTAAGCTGTAGATGAACTTTTCACCTTTCTGATCAGAAATTCACCATTTTATAG	intergenic
459	ASHGA5P027759	0.000572451	0.00448247	3.35173	ENST00000538202	RP11-429A20.4	GENCODE	723	chr12	+	5132847	5134758	GGAGGGACTCTCTTATTCTTGATGTTCCCCACACCTGGAATTTCAATAAACATCTCAATA	intergenic
460	ASHGA5P028370	0.00339013	0.0171316	3.33972	ENST00000534849	RP5-916L7.2	GENCODE	570	chr12	+	126468247	126470780	AGTAGCTCTTTGGGTGACTGAGTGGGGTGGAGTGATGTCCAATAAACATCAAGGCATAAT	intergenic
461	ASHGA5P017839	3.99443e-08	3.673e-06	3.33642	ENST00000446290	RP11-274B18.2	GENCODE	338	chr9	-	71158456	71161505	GATGTGCAAGTGTTGCCACCTTTAAATGGCCCCTTACTCTCATAATCAGTGCTGAGTAGT	intergenic
462	ASHGA5P020685	0.000284247	0.00261592	3.31616	ENST00000518470	RP3-399L15.3	GENCODE	563	chr6	+	114602975	114789738	TCATGCAGTTACTTTGAGCAATGACCAAACAGAGAGAGGAAGAAAGAAGTGTTGAAGAAG	intronic antisense
463	ASHGA5P056788	0.00291952	0.0153892	3.31403	TCONS_00008643	XLOC_004156	LincRNAs identified by Cabili et al	613	chr4	-	171196395	171201364	TTGGTCAAAATCCACCATGAGCTGTTAACTCCTCCTTTTTCCAAGAGAGAGGGTGACTGA	intergenic
464	ASHGA5P027159	0.00334577	0.0169936	3.31321	ENST00000553105	RP11-996F15.2	GENCODE	2380	chr12	-	29433350	29470781	CTGGTGAAACCTAGGACTTTAAGATGATAGATGAATTTCTGATTATACTTTCCTTTCCCG	natural antisense
465	ASHGA5P038405	0.0120434	0.0448936	3.31223	TCONS_00023409	XLOC_011256	LincRNAs identified by Cabili et al	1140	chr15	+	52977217	52982263	GTCCTAAATGATGGCAATGATGGTCCATTTTTCTGTGAAACTTGACTGTATACCTGTTAA	intronic antisense
466	ASHGA5P053275	0.00579275	0.02583	3.31195	ENST00000419905	AC068610.3	GENCODE	746	chr7	+	114719051	114765845	AATAACAGAAAGAAAGAAGTGGCTGAAACCTAAATGCCATATGGAGAAGACAGCTAATTG	intergenic
467	ASHGA5P026748	0.00689342	0.0294289	3.31158	uc001pgr.3	BC040646	UCSC_knowngene	1952	chr11	+	101978616	101980568	CGTTTACCCCTCTCAAGTGAGTTTTTGCAGACTAACAGATAAGTGAAACAATTACAAAAT	intergenic
468	ASHGA5P051763	5.35303e-06	0.000137451	3.30995	NR_001566	TERC	RefSeq	451	chr3	-	169482397	169482848	TTGCGGAGGGTGGGCCTGGGAGGGGTGGTGGCCATTTTTTGTCTAACCCTAACTGAGAAG	intergenic
469	ASHGA5P025792	0.0113167	0.042795	3.30491	NR_037859	PIR-FIGF	RefSeq	2582	chrX	-	15363712	15509432	TTACACGATATCTGGAGATGTGTATATTGCCCTCTCTATATCCCAGCACAGGTATGCCCA	exon sense-overlapping
470	ASHGA5P058376	1.86016e-05	0.000334081	3.30102	uc002ido.3	BC073918	UCSC_knowngene	980	chr17	-	41373436	41383338	CATCTGCAAACACAGACATTTATGGGGGAGATGGAGAGAGGAGAGATTAAGGAGAAAAAG	intergenic
471	ASHGA5P021189	6.1336e-06	0.000152073	3.30001	ENST00000527321	RP11-705O3.1	GENCODE	586	chr11	+	77850860	77852968	AGATACAGAGCTACAGTCAAATGGGCAGCTGAAGATGATGATGATGATGATCTTGACACC	bidirectional
472	ASHGA5P040867	0.000267727	0.00250518	3.29482	TCONS_00021760	XLOC_010354	LincRNAs identified by Cabili et al	1121	chr13	+	40177555	40215175	TTCCAGATGATACTCACCCTAACTGCCCAAGATGGACAACTAATCAAAACAAGCTCAGGC	intergenic
473	ASHGA5P043960	0.000249823	0.0023802	3.29209	uc022anb.1	TCRBV13S1-TCRBJ2S1	UCSC_knowngene	331	chr7	+	142028272	142028603	TGACAAAGGAGAAGTCCCCAATGGCTACAATGTCTCCAGATTAAACAAACGGGAGTTCTC	intergenic
474	ASHGA5P041224	3.16089e-06	9.2942e-05	3.29183	ENST00000511000	CTC-467M3.2	GENCODE	508	chr5	+	87987573	87988676	ATTTCTTAGTCTCTTTCTTCCCTGGCACTCTTCCTCCGAGGCCAGAAGTCTGAATTACTA	intergenic
475	ASHGA5P026986	0.000779495	0.00563104	3.27683	ENST00000537370	RP11-264F23.4	GENCODE	495	chr12	-	4361900	4384231	TTTAATGGCCTAACCCCAAAAAGATAACTTGGCAGCCATCAAGCATTCAGCAGCGTTCCA	intronic antisense
476	ASHGA5P042340	0.000947759	0.00649213	3.27424	uc003noi.3	BC035647	UCSC_knowngene	2518	chr6	+	29894105	29897504	AGTGTCTCATGAGAGATGCAAAGTGCCTGAATTTTCTGACACTTCCTGTTAGACCTCTCC	intergenic
477	ASHGA5P047015	4.40797e-05	0.000645125	3.27117	ENST00000449419	RP11-429G19.2	GENCODE	948	chr10	-	97634840	97667532	CCTGGGGCGTGGGTCTCTCATCCCTCTCGTCCTGGTGAAGAAGAAGAGTATACCCAGCGG	natural antisense
478	ASHGA5P014782	0.00997694	0.0389906	3.26411	ENST00000413317	FCGR1C	pseudogene	912	chr1	+	149369356	149377963	ATGGGCAAGTGGCCTCCATGGGTCAGCGTGTTCCAAGAGGAAACCGTAACCTTGCACTGT
479	ASHGA5P045311	0.000161185	0.00171777	3.2638	ENST00000456944	RP11-82L18.2	GENCODE	583	chr9	-	91703518	91724213	CTGGTGACCTTTCTACTGATTGCATTGTACCTCTTTCCCTGATATTAAAGATGTTTTTAA	intron sense-overlapping
480	ASHGA5P015764	0.00684429	0.0292711	3.25371	ENST00000423274	BRWD1-AS1	GENCODE	691	chr21	+	40687632	40695144	GGAAACAGATGAACAAAGATTTCTAACAAGAGAGAGAATATCTTCCCGATTCGACTCCCA	intergenic
481	ASHGA5P046452	0.014176	0.0509006	3.2477	ENST00000421585	GS1-594A7.3	GENCODE	574	chrX	+	15621003	15639607	GTTCCATGTACTTTCTTGTTTTCCCATAAAAATCTGGATTTGTGGCAGAAGAGAATGAAA	bidirectional
482	ASHGA5P031402	0.00480316	0.0224038	3.24737	ENST00000426575	RP11-318C24.2	GENCODE	657	chr1	-	175873897	175889649	CCTGGCTGTTCTGTTCATGACGGTGGTTATTCCAATTACTTTGAGAATTATATTTATTAG	intergenic
483	ASHGA5P028459	0.00814776	0.0334025	3.24312	ENST00000413591	LINC00365	GENCODE	2618	chr13	-	30677314	30683005	CTTCATCATGTAACTCTTGAATAAATTTGGATGCAACAGATTAAGGGCATAACCAGGAAA	intergenic
484	ASHGA5P046095	0.000382085	0.00331582	3.24239	TCONS_00001640	XLOC_000978	LincRNAs identified by Cabili et al	1171	chr1	-	117338493	117349012	TTTGAGGAATGGTCCCTGTGAAGACTTCCCCTTAAGAGAAGTTACCCCTGAGGAGAATTA	intergenic
485	ASHGA5P049464	0.000279904	0.00258329	3.24022	TCONS_00022123	XLOC_010732	LincRNAs identified by Cabili et al	1101	chr13	-	112925564	112927327	AGAGCTGTACCCCCGCTCTGGGGGGTTTATCATCAGAAGGAGAGAGACCCGAGGGAGCCA	intergenic
486	ASHGA5P057455	1.53286e-05	0.000293495	3.23823	TCONS_00017629	XLOC_008277	LincRNAs identified by Cabili et al	266	chrY	+	2979378	2981965	TGTTTCATTGTGAACTGGCTGAGCTTTCCAAGATGTGGTTGAACTGAAGTGAAGATAGAG	intergenic
487	ASHGA5P053200	0.00132359	0.00834458	3.2382	ENST00000452010	MYH16	GENCODE	481	chr7	+	98895534	98899427	GGTTAAAGCTGACATCGACCGAAGAATCCATGAGAAAGAAGAAGAATTTGAGGCTACCAG	intergenic
488	ASHGA5P034842	0.000764802	0.00555851	3.23671	BG287098		LincRNAs identified by Khalil et al	920	chr12	+	4156752	4157523	ATATCTGTGAGGTCTAACAACGTCCCTAAGCCTTATCCTTTTAGGATCCCAGTCATCCAG	intergenic
489	ASHGA5P051762	0.0237532	0.0747593	3.23656	ENST00000488647	EGFEM1P	GENCODE	709	chr3	+	168527563	168542773	CCTGATTACACAAGAAAATCCTGTACCATATGTAAGTCATAAACCTAGACGAAATAACCA	intergenic
490	ASHGA5P025694	2.68974e-06	8.2649e-05	3.22767	NR_027074	LOC283761	RefSeq	2366	chr15	-	90048160	90067265	CTTGTGACAGAGAGAGAGAGAGAAGCAGAGAGAGAGTTTTTATAAGGAATTGGCTCACAT	intergenic
491	ASHGA5P023378	0.0019855	0.0113786	3.22717	ENST00000579603	RP11-434D2.11	GENCODE	283	chr17	-	20458739	20462723	ATGAAGGGGATTTCTGGTGGGGTAACGCTCTTGCCGCACGTGCAGAGAGAGAGGAACTTC	intergenic
492	ASHGA5P037351	1.19915e-05	0.000241826	3.22562	ENST00000411694	AP001055.6	GENCODE	863	chr21	-	45578622	45579955	GTGAGCTCTTTAAAGTGGCTAAAGTGGTAAACCTTGTGTTTTGTATAGATTCTACCAATT	intergenic
493	ASHGA5P056307	0.000387386	0.00335086	3.22374	TCONS_00002090	XLOC_000294	LincRNAs identified by Cabili et al	207	chr1	+	93797323	93798755	AAGCAGATAGGGAAAAGAGTATCTTTTCAGTGTGTGTATATGTGGAGGTGATGTGGCGAT	intergenic
494	ASHGA5P043131	0.000294177	0.00269202	3.22065	ENST00000450426	AC083884.8	GENCODE	686	chr7	-	74103272	74143103	GGCTCAGAAACTAAGTATTTGACTTGCCCAAACCCTCATAAGATAAAGAATCTATCCCCT	natural antisense
495	ASHGA5P046477	0.028892	0.0865624	3.20479	ENST00000497961	RP11-242C19.2	GENCODE	562	chrX	+	30716323	30740049	CTTTACTTAATATCCAGGTTCAGATTTTCAAAGAATATATACAGTAAATGAAAATAGCAG	intron sense-overlapping
496	ASHGA5P028349	0.0114916	0.0433298	3.20276	ENST00000545293	RP11-324E6.6	GENCODE	751	chr12	+	123198837	123200255	ATTTCTGCTTAGTTGTTTCATGATGTAGCTCAGTGTCTGTGTCTCTTTCTTACTTTGCAG	natural antisense
497	ASHGA5P019641	0.00341016	0.0171993	3.20016	NR_052005	CD274	RefSeq	3518	chr9	+	5450502	5470567	GACTCACTTGGGAGAATGATGGATGTGAAAAAATGTGGCATCCAAGATACAAACTCAAAG	exon sense-overlapping
498	ASHGA5P050272	0.00814627	0.0334025	3.19694	TCONS_00001924	XLOC_000027	LincRNAs identified by Cabili et al	686	chr1	+	2730631	2734321	TTTAAGGTCCTGCTCTTTTCCTCTTGACAGCAAGCTACCACTGTTTAGAGAGAGTCTCCT	intergenic
499	ASHGA5P058799	0.000103764	0.00125047	3.19127	uc.314+	uc.314	UCR	202	chr10	+	124852202	124852404	TTGCAATAAATTACACAATTCATTTCCTCCATTTAGAGAGAGAAAATCACACCTCCAGGC	intergenic
500	ASHGA5P044321	0.0122242	0.0453018	3.19063	ENST00000562490	RP11-102F4.3	GENCODE	3266	chr8	-	70579283	70582549	CGTGTGTTTAATGAAATCTGTTGTCGATGTACTAATCTTGGTTTACAGCATCTTGAATAC	intergenic
501	ASHGA5P047572	0.000127583	0.00144108	3.18095	TCONS_00014179	XLOC_006188	LincRNAs identified by Cabili et al	233	chr7	+	99597001	99605862	CCCCACCTGCAGAGTCAAGTCCCTCCTCCCACCTCAGCACTGCTAGAAAAGAGCTTCAGG	intergenic
502	ASHGA5P011997	0.000139908	0.00154875	3.18019	NR_027690	CERKL	RefSeq	3162	chr2	-	182401400	182521834	AACTGATGTAACAATGTTGTCTGTGTTGGTGGAGATGGATCTGCTAGCGAAGTAGCCCAT	exon sense-overlapping
503	ASHGA5P029013	0.0241761	0.075741	3.17263	ENST00000557232	AE000662.93	GENCODE	386	chr14	-	23025204	23025956	GAAGTGGGAGACTTTTTCCACTTCCTGTTCTACTTGTGGCTACTGACTCAATGTCTGACC	natural antisense
504	ASHGA5P033294	0.00233576	0.012883	3.17121	NR_046273	LOC729683	RefSeq	2348	chr17	+	61777697	61780045	GGAACTTTTTAGCTCCAAAGTGGTTTGATGACCACAGGCTAAAATTCATAGTCTTAAAAT	natural antisense
505	ASHGA5P027224	2.55193e-06	7.9422e-05	3.16489	ENST00000550426	RP11-493L12.2	GENCODE	683	chr12	-	47599680	47609983	AGGAGGCAGGAGGTGGAGCAAAACACACCAAGCCTGGTGCCAATCATTGACAATATTATG	intronic antisense
506	ASHGA5P016048	0.0114437	0.0431742	3.16362	ENST00000426204	RP11-202G18.1	GENCODE	744	chr9	-	113901525	114047116	CCGAGAAGAGCCCCATTGCAATCAGAAGATTATTTATGGAAAAAAGCAAAATGGAGATAT	intergenic
507	ASHGA5P014872	0.000247901	0.00236362	3.15918	ENST00000414198	AC144521.1	GENCODE	737	chr3	+	18486515	18568000	ATCCTTGTAGGACTCTGGAGAAGATCAAATGGGAGCTTAGATGTGGAAGCTCTTTGGAAA	intronic antisense
508	ASHGA5P043049	0.000892622	0.00620957	3.15753	ENST00000568457	RP4-647J21.1	GENCODE	1911	chr7	-	44998597	45000508	CCCCTCAAAAAATGCTTAGACTTAATTATTTTAATTATCCTCACATATACTCCTCCGGCT	intergenic
509	ASHGA5P040918	0.00219313	0.0122897	3.15663	TCONS_00021965	XLOC_010561	LincRNAs identified by Cabili et al	827	chr13	-	31627560	31630980	AGAAGATTGCCTCAAACGATGAATTGTAGAATGGAGCAGGATGTCTGTGTGTCTGCGTCT	intergenic
510	ASHGA5P045483	2.05875e-06	6.6243e-05	3.15214	NR_033883	LOC339529	RefSeq	1809	chr1	+	244080703	244210619	TATCAACCTGTTCATTTCTAAATGCCAGAAGAGAGATGAGACAGAGAGAAAAAAAACTAA	intergenic
511	ASHGA5P052171	0.0206123	0.067081	3.15085	uc021xvv.1	AK023178	UCSC_knowngene	2508	chr5	-	470570	473078	CCTGAACGATTACTAGACCAATTCTATTAAAAACATTTCAAGGCATTTTGGGTGCAAACT	exon sense-overlapping
512	ASHGA5P016193	0.00254259	0.0137891	3.12743	ENST00000427835	C20orf61	GENCODE	558	chr20	-	11790634	11830259	GAACCTGGATTCTCTTCGTGGCCTGTGCTGAGGACTACATCAGTCTCCTGCAATTATCAT	intergenic
513	ASHGA5P056290	6.66573e-05	0.000886508	3.12644	TCONS_00001811	XLOC_001195	LincRNAs identified by Cabili et al	972	chr1	-	212804779	212811198	TCTGGGGGCCTTGGTCAAGGGAGAAGCAGTGATGTTTTAGTATCCAGAAAGTGGAAATAA	intergenic
514	ASHGA5P053557	0.00379287	0.0186508	3.11378	NR_038446	LOC100130231	RefSeq	5338	chr8	-	126953375	126963441	ACAACTTTAGGTTGGTTTGCCTAAACTACTAGGTTCTCAATCTATATGAACCTCCTCCAG	intergenic
515	ASHGA5P044643	3.58753e-07	1.891e-05	3.10614	ENST00000520582	RP11-62H7.2	GENCODE	722	chr8	+	8818709	8821298	GTGCAGGAAGCCTGGGTCGCGGTGCATCGTGTTTAAAAATAAACACACACTTCCCTTGGG	intergenic
516	ASHGA5P046390	0.0437811	0.118002	3.10599	AW847630R		LincRNAs identified by Khalil et al	188	chr18	+	39409625	39409813	AAGCCCTGGATATTGCCCTCTAGGCCACACAATCCTTCTTCTCCCTCACAAAGATAAATT	intergenic
517	ASHGA5P021319	0.00859598	0.0348108	3.10059	ENST00000530002	RP11-305N23.1	GENCODE	764	chr11	+	119252544	119346419	AAACACAAGAAGATTCAGCCCTGTCATCTTGTGCAAAGATGAGTCAGGAACTCCTGGAGT	intronic antisense
518	ASHGA5P039955	0.00269325	0.0144491	3.09806	uc003hcu.1	BC039452	UCSC_knowngene	2168	chr4	+	62941883	62944051	ATACACCTACCAGATTTCAAGCTATTGGATATTTCCCTTGTACAACCTTTACATCCTTTT	intergenic
519	ASHGA5P057852	0.0020644	0.01171	3.0967	TCONS_00022688	XLOC_010979	LincRNAs identified by Cabili et al	612	chr14	-	26851402	26866526	AAGGATCTATCTTGGCACCCAGCTAACTTCTCTACCCTGGAGGATCAGGTGAAAGAAAAA	intergenic
520	ASHGA5P031334	0.000198851	0.002021	3.09639	ENST00000570137	RP11-18F14.2	GENCODE	4614	chr16	-	80631802	80636416	GGGTGCCTTAGAAGTTGTATTTTTCATGTGTGCTAATATGCAGTATTTATACATTGTGAG	intergenic
521	ASHGA5P044162	0.000900414	0.00624367	3.09301	uc003xcr.3	BC043400	UCSC_knowngene	1943	chr8	-	22863895	22876848	GCTTCACATGGGTATTTAACATGCTCACATATTTAGTTTATCCCTCAGCAAAATTATAGG	natural antisense
522	ASHGA5P000049	0.0163528	0.0565007	3.09176	AK055244		NRED	2542	chr18	+	31328183	31330724	GACAAACACAGATTGGGGGCGAAGGCCCTGAACCTACATAGACATTTTATATCAGCATAC	intergenic
523	ASHGA5P030459	0.000348794	0.00308304	3.09029	ENST00000559022	RP11-521C20.3	GENCODE	461	chr15	+	40381032	40381587	GATCACTAAGCCAATTAAAAACAACCAGCCAGAAAGAACCTTTCTCCTTCCTGACAGCTA	natural antisense
524	ASHGA5P048735	0.00269266	0.0144491	3.08283	uc001bql.3	SNHG12	UCSC_knowngene	1080	chr1	-	28905049	28908366	TCAGACAGGTTTCAGAGATGGTTGGATCTCTGAAATTGTAAAATGAAGTATAATCTTAGG	natural antisense
525	ASHGA5P016607	1.24576e-05	0.000247378	3.08208	ENST00000432148	RP11-274B18.2	GENCODE	495	chr9	-	71158456	71161032	CTCTCTAGAGTGTTGCCACCTTTAAATGGCCCCTTACTCTCATAATCAGTGCTGAGTAGT	intergenic
526	ASHGA5P049394	0.0335819	0.0969837	3.0797	uc002fqr.2	AX747598	UCSC_knowngene	1781	chr16	+	90168701	90204399	CAAAAGTCATGGCGTGTAACTGTCCGAACAGTGAACTTCGGAGATCCACCGGAGGGGCGA	intergenic
527	ASHGA5P037480	0.0250344	0.0776047	3.07784	uc002ywy.3	AK027145	UCSC_knowngene	2046	chr21	+	39645397	39647443	CAGTGTAGTTCCCAATATGGCCTCATACTAACTTCAGATACCCCAGTGTATCTGAAGAAA	intron sense-overlapping
528	ASHGA5P022998	0.00853515	0.0346185	3.07173	ENST00000567396	RP11-16E23.3	GENCODE	428	chr15	-	66058797	66059736	TGTTAGACAGGATAGGAAAATTTATCTCAGAATTTAGTAGATTGGTTTTCATTGGGATTT	intron sense-overlapping
529	ASHGA5P050448	3.92344e-05	0.000586796	3.065	ENST00000418854	AC007254.3	GENCODE	545	chr2	+	40146832	40332461	AAGCTGTTTGGTGAGTACAATGTTAATATAGAGACAATCAGAATGGTGTGTGCTTTTGTA	intergenic
530	ASHGA5P030807	0.00665625	0.028694	3.06462	ENST00000431060	RP11-66B24.2	GENCODE	3907	chr15	+	101390035	101404501	CTGAAAAATGAAGACGTTCCCACCAGTTCCAGAAAACAGGGCTAACTTAAAATGCAGCCC	intergenic
531	ASHGA5P032332	0.0482826	0.126609	3.0643	ENST00000579164	RP11-271K11.5	pseudogene	1974	chr17	-	29365592	29378044	AAGACAAACATTTGAATCACTACCATTTTTGCAGTATACGTAAGTTACAAATATAACTTT
532	ASHGA5P049778	0.000711505	0.00528413	3.06044	ENST00000579003	hsa-mir-142	GENCODE	1625	chr17	-	56408244	56409869	CGGACAGACAGACAGTGCAGTCACCCATAAAGTAGAAAGCACTACTAACAGCACTGGAGG	intergenic
533	ASHGA5P028435	5.73251e-06	0.000144337	3.04702	uc010tdg.1	AK054988	UCSC_knowngene	2088	chr13	-	25498811	25501871	TATGATGGCATAAAGAATTGTATCAGAACGGGTAATCTGGCATTAAAACCCCTGTGCCAC	intergenic
534	ASHGA5P036502	0.0497534	0.129627	3.04549	TCONS_00027178	XLOC_013218	LincRNAs identified by Cabili et al	415	chr19	-	9944973	9945573	AACCCTATGTGACCGTTAAAAAGAATGAGGCTCAGTGAAGTGAACTCATAGGGAAACCTG	intergenic
535	ASHGA5P052742	0.00249103	0.0135833	3.04295	ENST00000451910	RP11-344J7.2	GENCODE	394	chr6	-	43819493	43820070	GAAAATGCAGGTATCATTAACAGCCTGGAGCACTGTGGCCTGTCCACTCTCAACCCTCTG	intergenic
536	ASHGA5P039102	0.00246858	0.0134949	3.04006	ENST00000460407	RP11-38P22.2	GENCODE	2050	chr3	+	152557178	152559228	TCATAATTGTGGTCACTAGAACTGTACTTACCATGGACAGTTAAAACTGAAAAAGACTCA	intergenic
537	ASHGA5P036098	0.0468877	0.12379	3.03972	NR_026821	FAM138B	RefSeq	1130	chr2	+	114334958	114336429	ATGTACGTAAAACACCAGGTGCCTAACCCGGCACAGAGCAGGAGGGCTAAGCGTGACATC	intergenic
538	ASHGA5P049757	0.0167181	0.0573956	3.0328	ENST00000519432	AC091062.2	GENCODE	541	chr17	+	48986038	48986778	TCCTCTGTGGTTTAGAGCATGCCCTGGAATCCCTAGCACAACCAGGTGACGAGAGTTCCC	intergenic
539	ASHGA5P014723	0.00222311	0.0124416	3.02202	ENST00000412784	CEP170P1	GENCODE	1070	chr4	+	119437494	119475359	TTGAAGATGTGTGATTATTTTCAGTAGGCAGACATCTAACCCTGAAAACCACTCGCTTGC	intergenic
540	ASHGA5P057147	0.0015076	0.00924745	3.02108	TCONS_00013742	XLOC_006385	LincRNAs identified by Cabili et al	323	chr7	-	26167952	26170398	GTGGTCCCAGCACCTCTGGGCCAGTCCAGCCAGGTGTAGAGTGAAGCTGAGCCCTTGATT	intergenic
541	ASHGA5P026923	6.66972e-06	0.000160457	3.01942	ENST00000447864	AP002856.6	GENCODE	562	chr11	+	131074893	131085058	TAAACAGATTAAAGCCAGAATGAGCCAGCTCCTTGCAAACCAGCCATTCTACTCCTGATG	intergenic
542	ASHGA5P053114	0.00411271	0.019862	3.0162	uc022aft.1	NCF1	UCSC_knowngene	271	chr7	+	72639489	72639760	AACTACAAATATTCCTTCACGTCTTCTTGTCTTTTTAATGTTTAGAAAACCTTAAAAGAA	intergenic
543	ASHGA5P031878	0.00881186	0.0354966	3.01604	ENST00000562696	CTD-2033A16.1	GENCODE	575	chr16	+	69743776	69744486	AGATGTACGGTGTGGATTTATTGGTTTATCTCTGCAAACCTTAAAGTAGAAGATTGCAAG	natural antisense
544	ASHGA5P040771	0.0195579	0.0644655	3.01537	uc010pbg.1	FCGR1C	UCSC_knowngene	626	chr1	+	149369293	149370314	TTTCCAATGTACAAGCTGCTGAAGCCCTGCAATGTACTCTCAGAGACAGTATAGCTCAGA	intergenic
545	ASHGA5P054467	0.00178912	0.0104975	3.01181	ENST00000443523	RP11-556E13.1	GENCODE	369	chr10	-	54316742	54515169	GTTGAATGTACAGCTGGTATAAAAATGGTGCTTTGTCGTCATGAAGAAGGTGTATTCTGG	intergenic
546	ASHGA5P039750	0.00644297	0.0279792	3.00771	uc003izq.3	BC087857	UCSC_knowngene	1645	chr4	-	190784613	190860993	TTGCCCTTGTGTTCTTTGTGCGTGATTTATGACAAAATTATGAGACCTTTACATTTGTGG	bidirectional
547	ASHGA5P032165	0.0223893	0.0715257	3.00666	TCONS_00029762	XLOC_014159	LincRNAs identified by Cabili et al	939	chr22	+	20850203	20853121	GAATTTGCCGAGAGTCGCCCCGTCTGAATCCATTGACTCTTTCCTTGCCTCGGTCCTACC	exon sense-overlapping
548	ASHGA5P042612	0.0466982	0.123528	3.00552	ENST00000444229	RP11-527F13.1	GENCODE	583	chr6	+	126498338	126523385	CTGGTACATAATGCAGTGTCTGGTATATAGTAGGTGCTCAATAAAGGTCTGTTTAATAAT	intron sense-overlapping
549	ASHGA5P048731	0.00323454	0.0165846	3.0052	ENST00000568092	RP11-299H22.6	GENCODE	3511	chr15	+	62567053	62570564	TTTAATCTAGGAGTGTTTGGTAAACTTCACCATGTCTATATGTCTGTGTCTTTGCACCTG	intergenic
550	ASHGA5P029399	0.0401879	0.110339	3.0042	uc021rnj.1	BC016035	UCSC_knowngene	1170	chr14	+	19650031	19719035	TTGATTGTTAGGGAAGTATAACTTAAAAGTTTATAAAGTTTCACATACTTCTCTTTATAT	intergenic
551	ASHGA5P017944	0.000809974	0.00578114	3.00324	ENST00000447453	AC078941.1	GENCODE	750	chr2	-	67351801	67405124	AGAGAAGAAGGTTAGTTCCATGACTTGACTAAATGGGGGCTTGGCTATCTTGACAGAGTC	intergenic
552	ASHGA5P028900	0.000377191	0.00328699	2.99789	NR_027350	MIR17HG	RefSeq	5018	chr13	+	92000073	92006829	GGAAAGAAAGCACTTAACATTTTAGGAATTCTTTTTAAAGCTGCTTGCAAAGTGTTGGTG	intergenic
553	ASHGA5P049342	0.0138404	0.0499531	2.99452	ENST00000564138	RP11-510J16.3	GENCODE	2775	chr16	+	81993523	81996298	CTCAACCCTTTTGACTTTAAAAGGAAAATAGCTTAACCTTCAACCTGTGTGACATTTAAC	intergenic
554	ASHGA5P016296	0.000140453	0.00155265	2.99423	ENST00000429037	HLA-P	pseudogene	534	chr6	+	29760010	29760913	ACTACAACCAGAGTGAGGCCTGGTCTCACACCCATCTAGAGGATGTCTGTCTGCGACGTG
555	ASHGA5P041515	0.000190998	0.00196094	2.99264	ENST00000517508	CTC-340A15.2	GENCODE	804	chr5	+	163723701	164192411	AAGGATAACTCTCCATTCGTGAGAGAGAGTGAGCTACAGAGGAAGAAAGACCACGCAAAA	intergenic
556	ASHGA5P034693	1.73885e-05	0.000318469	2.98743	NR_040599	LOC100505812	RefSeq	1984	chr19	+	48758931	48761450	CCGCCCAAGAATGATTGTTAATTTCCGTCCATCATTTTCCTTTGATTGTTCTTCATCTCG	natural antisense
557	ASHGA5P035746	0.00478924	0.022355	2.98452	ENST00000565841	AC012065.7	GENCODE	1437	chr2	+	20877568	20879005	CCTCCCAGGGCTGGTAGAAACCTATGTGTATATATATTCTCAAATTTAAATAGATTGTAC	intergenic
558	ASHGA5P023239	0.00106737	0.00711595	2.98224	ENST00000575487	CTD-2309O5.3	GENCODE	515	chr17	-	3066298	3080325	GGAGCTGGAGTTGGGGTACAGCAAAGTTCTGCTGCCACAGAGGAAGGGGAACCTGGCCGT	intergenic
559	ASHGA5P028910	0.00400412	0.0194754	2.96697	ENST00000339009	UBAC2-IT1	GENCODE	444	chr13	+	99970407	99971209	GTTTGTGCTTTCAAGGTAATTTTGATGAAAGTTTTAGCTGGGCTTGTCAGTGTTGTTTTT	intron sense-overlapping
560	ASHGA5P048652	0.0229143	0.0727545	2.96683	ENST00000559368	OIP5-AS1	GENCODE	642	chr15	+	41576205	41580469	GGCGGAGTAAGGCGTGCCGCTGCAAACTGGCCTCTGGGCCGGGGGCGAGCAGCCCCCGGG	intergenic
561	ASHGA5P007631	1.07324e-06	4.2172e-05	2.9611	ENST00000335223	RP11-56D16.2	GENCODE	759	chr9	-	130455256	130477926	AAATTGCTGCTCTGTTTTCTTAACTGGCTTGGCTTGGACTCATCGTCAACAGCAGCAGCA	exon sense-overlapping
562	ASHGA5P038769	0.00271178	0.0145305	2.96075	ENST00000432377	RP11-70C1.1	GENCODE	897	chr3	+	42812103	42815127	AAGGCCATGTTATGATGGTGAGTGAAGGAAGCAGGACGCAATATAGCAATGCTAAATAAA	natural antisense
563	ASHGA5P023234	0.0465175	0.123176	2.95879	ENST00000575193	ANKRD36BP2	pseudogene	1245	chr2	+	89082228	89104917	ATATTACTCATTGATCAACATGAAATGAAGTGCAAAGGAAAGATTTTGTCAACTAAAAAA
564	ASHGA5P031105	0.014944	0.0530174	2.95617	TCONS_00006092	XLOC_002701	LincRNAs identified by Cabili et al	466	chr3	+	71835019	71835668	TTTATGCCCACATCTGTTCCCGACCCTCTCCTCTGATTTTCCTCACATGTATTTCCTCCC	intergenic
565	ASHGA5P014917	3.38702e-05	0.000524386	2.93681	ENST00000414722	CASC2	GENCODE	679	chr10	+	119805789	119966171	CCCGACCCCGATGGAGATTCAGAAACATAAGGACAACAAGAAACTTCCCCAAGGTATCAT	natural antisense
566	ASHGA5P049602	0.0487093	0.12747	2.92622	TCONS_00019318	XLOC_009152	LincRNAs identified by Cabili et al	323	chr11	+	63262960	63268075	CACCTCTGTCCCTTCTCCATGCTCCCAACTGCAAAGGGAGGAAGAGGTGGTGTCTTTGAG	intergenic
567	ASHGA5P026559	0.00466867	0.0219263	2.9247	ENST00000416342	RP4-537K17.2	GENCODE	429	chr1	-	62580419	62584681	TGTAGCTTCTAAATTTGGTAGTTCTGTCTTTGAGTGTGAACTTAAAAATTATGAAGATGC	intronic antisense
568	ASHGA5P023586	0.0161737	0.0560699	2.90998	ENST00000584959	RP11-927P21.1	GENCODE	631	chr17	+	62888941	62906298	GGACAGATGATGCCAGTTAATTACTTTGAATGCAAGTTTGAAAACCACTGCTTTAAAGAA	intronic antisense
569	ASHGA5P023924	0.0462164	0.122554	2.90501	HMlincRNA963+	HMlincRNA963	LincRNAs identified by Khalil et al	5318	chr3	+	168554930	168560248	GTCTTCAGGATTCCTTTTGCCTTGCTTTGTCTGTTGTGAGTATATTTGCATGAAAACAGG	intergenic
570	ASHGA5P036857	0.0295725	0.0881126	2.90482	ENST00000417346	RP4-800J21.3	GENCODE	1540	chr20	-	55959215	55968118	TGGGATTCATAAGAGGAGGAAGAAACCTATCATGCTGACGGGTAGTGAAGAAGAGAAATG	natural antisense
571	ASHGA5P048054	0.000526221	0.0041862	2.90462	ENST00000532068	CTD-2210P24.2	GENCODE	860	chr11	-	45755544	45757317	ATGTTTATCTCCATGAGAAGATAAGCCACAGGGAGAGAGAAAGACTGTTGTGCACGAGAG	intergenic
572	ASHGA5P042968	0.00119195	0.00772619	2.9041	ENST00000450540	AC007255.8	GENCODE	510	chr7	-	29554706	29603286	GACAATTTAACAGTGGGTTTCTGGAAACAGTGCTGCCTCCTTGATGGTCTAACTAACTAC	bidirectional
573	ASHGA5P030046	0.00915395	0.0365679	2.90235	TCONS_00007997	XLOC_003460	LincRNAs identified by Cabili et al	482	chr4	+	13487673	13491548	AAGAAAAAAGGAGAGTTACAGGGGAGTCCTCCTCCTCCCTTCCTTTGCTGTCATTATTAG	intergenic
574	ASHGA5P043094	1.38903e-06	5.0018e-05	2.89744	NR_038378	LOC441242	RefSeq	1977	chr7	-	65111923	65235797	GTGTTAACGACCACACATTTTACACAAATGCCATGAATCCTTAAGGTGTTCCAATTTATA	intergenic
575	ASHGA5P021403	0.0361293	0.102134	2.89727	ENST00000531886	RP11-110I1.6	GENCODE	667	chr11	+	118914898	118916205	AGAGAGGAGGAGAACAGTTTCCATTTTTAACCACAGAGGTACTGCAGAAGGAACCAGTGA	natural antisense
576	ASHGA5P047490	0.000832636	0.00589023	2.89416	ENST00000394864	RP11-152N13.5	GENCODE	635	chr10	+	75012926	75014107	CAGCCAATGGAAATAAATGAATGGGTCTCTGTTTATAGTGAAGATTCTTTCGTTCTCCAG	natural antisense
577	ASHGA5P036228	0.000379784	0.00330071	2.89303	ENST00000432133	AC007556.3	GENCODE	307	chr2	+	169957252	169957720	GCAACCGTAACTTGAGTATAATGCCACCCAATTAATGTTGATGCCTGAATTATGAACCAG	intergenic
578	ASHGA5P032526	0.0298389	0.0886214	2.8918	ENST00000523083	RP11-893F2.13	GENCODE	547	chr17	-	48235693	48238637	ATTACAGGAGTAAGAGAGAAGAGGAGGGACTGTCCGAGGTGCCTCGGCACTATGGCTGCA	intergenic
579	ASHGA5P027804	0.0141455	0.0508242	2.89148	ENST00000539795	RP11-90D4.3	GENCODE	602	chr12	+	8474548	8482210	CCTGGCACAAAAGAGTTGCTCAATAAATAAATCAGGATGAATGAATAAACACATGGATAG	intergenic
580	ASHGA5P057424	3.49803e-05	0.000536793	2.89073	TCONS_00017187	XLOC_008000	LincRNAs identified by Cabili et al	932	chrX	+	64295360	64311672	AGGGAGTATGGAAGAAGCCAAGAATTGGGAGTTTTCTGCTGATGATGCTATGCTAAGCTG	intergenic
581	ASHGA5P045475	0.00557012	0.0251314	2.88686	ENST00000425370	RP11-123K19.1	GENCODE	506	chr9	-	129370556	129375978	GGCTGAAACATAAGTGCTCACCACAACACCCAGCACCTACCAGGCCTCTATACATATTTG	bidirectional
582	ASHGA5P010584	0.000878995	0.00615772	2.88055	ENST00000533551	PRKY	pseudogene	1019	chrY	+	7142353	7239909	TTCCCCAGACATTTGGATTTCCATGTAAAAACGGGGCGAATGATGTGAAACACCATCGGT
583	ASHGA5P055366	0.0089898	0.0360231	2.87626	ENST00000548222	RP11-493L12.2	GENCODE	625	chr12	-	47599684	47610032	ACGGCTGAAAAGATGGTCAGAAGGGGAAAGGAGGAAGTGAGAAGAAAGAAACAGGGAAAT	natural antisense
584	ASHGA5P057991	0.00158159	0.00955662	2.87416	TCONS_00024718	XLOC_011999	LincRNAs identified by Cabili et al	389	chr16	-	71466769	71467279	ATGCACAACCAGGAGAAGCAGCAGAGTCCAGCCCAAGCTTCCTACTGGGTTCTGAGGTTG	intergenic
585	ASHGA5P043305	0.0203738	0.0665628	2.87402	TCONS_00019593	XLOC_009395	LincRNAs identified by Cabili et al	266	chr11	-	23825999	23829778	AGGAATGTAGGAAGGAAGGACATCAGGCTCTGAACATCCATCCATGTAAAACATTGAATA	intergenic
586	ASHGA5P018579	0.00550437	0.0249215	2.86963	NR_046870	LINC00332	RefSeq	836	chr13	+	40755945	40763167	AGGAAGCCTGCACATAGAGACCTCCCATAGAGACGAAATATATCTACAAAAGGGTCACTG	intergenic
587	ASHGA5P017600	0.00161366	0.00971419	2.86911	ENST00000443587	DLEU2	GENCODE	705	chr13	-	50618650	50656108	GCATTGGAACATGACATGAGATTAAGTGTATAAAGCCAAATGTCCCATTTAAAGTTTGAC	bidirectional
588	ASHGA5P014040	2.29628e-05	0.000389227	2.86351	ENST00000542925	RP11-551L14.1	GENCODE	520	chr12	-	31264590	31269394	GTTCAACATTCAGCCAGCCCCAGGCATGGTCTACGATTAGTACGAAAAAGGTGGAGAAGC	intergenic
589	ASHGA5P041307	1.20626e-05	0.000242858	2.86351	ENST00000514544	CTC-428G20.2	GENCODE	370	chr5	+	114524259	114524629	AATACAGTTATGTCTTCACCTGCCAACCAACACCACAGTTATGGTCCAATGAACTGTATT	intergenic
590	ASHGA5P042362	0.00141997	0.00883998	2.85742	NR_002812	HCG26	RefSeq	1180	chr6	+	31439005	31440185	GCAGGTTGTTTAACCTTATATGTACAGTTTCACATATGTATAAAAACAGTAGTTTGGGCC	intergenic
591	ASHGA5P043037	0.0137582	0.0497914	2.85597	ENST00000446874	AC004985.13	GENCODE	3193	chr7	-	44066549	44078607	CCCCTCCAGGACACTCTGCACCCCCTCACCCCGGTCCTCCTCATTAGGGTGCAGGGCCTA	intergenic
592	ASHGA5P030728	0.0483899	0.126813	2.85555	TCONS_00006371	XLOC_002987	LincRNAs identified by Cabili et al	666	chr3	+	194566645	194567366	ATGAAGATGACGGTGATGGTGAGTATTGTGACCATAGCCTGGGCTGGAGTTAATGATGAT	intergenic
593	ASHGA5P047638	0.0150593	0.05331	2.85553	ENST00000454935	LINC00263	GENCODE	2551	chr10	+	102133371	102143125	GTCAAACAGAAGGTAAACAGTCTTACGAATGTAATTCCTTAGGAAGACTTGTACAAACTT	intergenic
594	ASHGA5P044158	0.00436692	0.0208413	2.84009	ENST00000566457	CTD-3247F14.2	GENCODE	4997	chr8	-	22536525	22541522	ACTGCATTTGCATCTCGGATTGTGTTTTTAAACCCATTTTCTCCCATATTTGCCTGAAAA	intergenic
595	ASHGA5P047091	0.000116734	0.00135514	2.83605	ENST00000424422	RP11-324O2.4	GENCODE	551	chr10	-	114172052	114179765	GATCCTCTGTAGGGAACTTCCTTTTCTCTAATCCTAGATCTTTTCAAAAATTCTAACCAA	intronic antisense
596	ASHGA5P047857	0.00196926	0.0113039	2.83548	ENST00000454892	HBBP1	GENCODE	455	chr11	-	5263183	5264496	CTGCCTGCTGATTCAGTTCCTGCATGATAAAAATAGAATAAAGAAATATGCTCTCTAAGA	intergenic
597	ASHGA5P003963	0.000475121	0.0039092	2.83418	uc001ihn.4	tAKR	UCSC_knowngene	544	chr10	-	4927672	4934216	TGACACAGTGGGTCTCTGCAGCACATGGGAGGCCCTGGAGAAGTGTAAGGATGCAGGATT	bidirectional
598	ASHGA5P048461	0.000404325	0.00346751	2.83325	NR_034148	LOC283143	RefSeq	2256	chr11	-	115626050	115630918	AGGATTTCTAAACCATTTCTGTAAGTCAGCCCTTGAGAACTTGTAGATTTTCTCATCATT	intergenic
599	ASHGA5P015596	0.0274263	0.0830538	2.82982	ENST00000421762	RP11-57H12.3	GENCODE	2447	chr1	-	95628774	95699538	GTCATTCACGGTATCATTTGAGGATATGCTGCAGCAAAATGAGTGAATAAACAAGAAAGT	intronic antisense
600	ASHGA5P019766	1.59464e-05	0.000300111	2.82423	ENST00000502764	HOXB-AS1	GENCODE	578	chr17	+	46624053	46628610	TAACATCTGCACCCAATGGTGGTTGGGCTTCGGGTCACGTGACACCTTCTTTGTGGCTCC	natural antisense
601	ASHGA5P045442	0.00154635	0.0093962	2.82284	ENST00000439562	RP11-261C10.5	GENCODE	694	chr1	+	243299199	243303890	CCTCCCCAAATCCAGGTGTCAAATTTCTTCACAAGATACATAAATTGCAAATTCCAATTA	natural antisense
602	ASHGA5P045725	0.000189098	0.00195693	2.82252	ENST00000440883	RP11-95K23.3	GENCODE	1988	chr9	+	41313944	41323179	GTTTTCTATATGAGTCCTCTCTGTGCATCTTAATAAATCACTTCCCGAGTCACTCCTCAA	natural antisense
603	ASHGA5P027417	0.00162762	0.00977789	2.81986	ENST00000548626	RP11-1143G9.4	GENCODE	429	chr12	-	69746948	69747436	ATTCTGGAGTTACACTCCACAACCTTGAACATACTGACGGACATCTCTGTTTTGACAACG	natural antisense
604	ASHGA5P031937	1.69858e-05	0.000312862	2.81696	ENST00000569938	RP11-467I17.1	GENCODE	419	chr16	+	79539499	79550190	CGGGATTTAGGGCTATTTTTTACAATGTTACTGAATGAATAAATTCCCCCAAGACTTACA	intergenic
605	ASHGA5P029522	0.0442975	0.118974	2.81386	ENST00000556620	RP11-111A21.1	GENCODE	857	chr14	+	39944059	39961974	GGACTTTCCCCTCACCTCCCAAATGTTTATTATGAAAAATTTCATTTTAAAGAAAGGTGG	intergenic
606	ASHGA5P044378	0.00812774	0.0333797	2.80277	ENST00000440763	AF121898.3	GENCODE	709	chr8	-	88554213	88767923	TATATGTTATGGATAGTTTGTATGTATGTGTGTGGTGGGGATGGTATGAATGCATGTGCT	intronic antisense
607	ASHGA5P042799	7.31922e-07	3.1792e-05	2.80151	uc011gqu.2	AX747809	UCSC_knowngene	2515	chr6_mann_hap4	+	1188312	1191712	TGCTGGAGTGTCTCATGAGAGATGCAAAGTGCCTGAATTTTCTGACTCTTCCTGTTAGAC	intergenic
608	ASHGA5P031678	0.000122507	0.00140663	2.8014	ENST00000570266	RP11-196G11.2	GENCODE	461	chr16	+	31054470	31061201	TAAGGAAGAGGGCAGACGGGGGAAGATTTTATAATTGTTCAAAAACATTCACTGGGATGT	intergenic
609	ASHGA5P032833	0.000816673	0.00580817	2.79977	ENST00000578788	CTB-41I6.2	GENCODE	557	chr17	+	8870839	8880312	CCCTAATGCAAATTCTCTGTGGTTAGGAATAAAAGGAGACTTTGTCAACATGATAAATGA	intergenic
610	ASHGA5P027222	0.00030349	0.00275585	2.79105	ENST00000553227	RP11-23J18.1	pseudogene	404	chr12	-	47529280	47529684	ATTCATCTACTCTGTGAAGTCTAGGACAGGAAGTCTATGGACAGGAAGATGGTTGGTGAC
611	ASHGA5P032886	0.00821658	0.033589	2.7906	ENST00000472367	C17orf76-AS1	GENCODE	794	chr17	+	16342640	16367300	CAGATGGCGGGCAGGGACGGGCTCTGCGGTCTGGCAGCTGACATTGATACAAGCAAAAAA	intronic antisense
612	ASHGA5P042661	5.0554e-05	0.000717999	2.78649	ENST00000440518	RP11-445F6.2	GENCODE	416	chr6	+	139604243	139608444	TTGGAGATGTGACCAGCTGCACATGACTTTACCTAAAAGCTTGCTATGTAAAGGACACTT	intronic antisense
613	ASHGA5P030434	0.0487868	0.127647	2.77888	ENST00000560683	RP11-463I20.2	GENCODE	468	chr15	+	35300669	35303383	ACAATGGAGAAGTGACATGCTAAAGGAACCTGGCATCTAGACATTTCCTAACCCCCAATC	intergenic
614	ASHGA5P014912	0.0125101	0.0461373	2.7766	ENST00000414699	AL773572.7	GENCODE	336	chr21	-	42552458	42558247	GTAATATCAGGCACAAAGGAAGGGCACTACAACCACAACCAATATCAGTAAAGCTTTGGA	exon sense-overlapping
615	ASHGA5P028542	0.00650184	0.02815	2.77576	NR_046414	LINC00441	RefSeq	1191	chr13	-	48870648	48877797	AGTTTCCTCTTTTTTGTTTTCTTAATGGCTTGATGAGCCACACATGTTTCTCTAAATGCA	bidirectional
616	ASHGA5P027354	2.55382e-05	0.000420182	2.77533	TCONS_00012278	XLOC_005834	LincRNAs identified by Cabili et al	640	chr6	-	133125512	133134602	TTTGTGTTTAATTTCCTCTCCTGGGTAGTCAGCCGCCAAACCAGTGAGCAATTATTAGGC	intergenic
617	ASHGA5P007949	0.00455076	0.02153	2.77299	ENST00000432102	NCF1B	GENCODE	930	chr7	+	72634658	72644059	CGAGTTCCATAAAACCTTAAAAGAAATGTTCCCTATTGAGGCAGGGGCGATCAATCCAGA	intergenic
618	ASHGA5P055695	0.0415615	0.113149	2.76712	ENST00000536517	RP11-173C20.2	GENCODE	421	chr12	-	127236886	127256808	TCGGCCACAGCCGCAGAATAAACATGTGGAGAAGGTCATTGATCACCTTGACTGAAGCAC	intergenic
619	ASHGA5P018546	0.0225592	0.0718558	2.76125	ENST00000454837	RP11-292F22.6	GENCODE	430	chr10	-	47620144	47640809	CTCTCAAAGAAAATCCTACCATGTGGTTATTCATGGAAATGGCTTTCAGAATCTAAAGAA	intergenic
620	ASHGA5P056849	0.00434342	0.0207597	2.75267	TCONS_00009859	XLOC_004271	LincRNAs identified by Cabili et al	607	chr5	+	6586436	6587959	TATTCACCAGGATTCTGCCATGATTGCCACCTCTGGAGACGTCACAGCCAGCACAGCCAT	intergenic
621	ASHGA5P044402	3.10038e-06	9.1787e-05	2.75234	ENST00000520513	LINC00535	GENCODE	305	chr8	-	94225530	94304914	TTGCCTGGGGGCTTTTGACTCTACAATCTCTTCCAACATTAAACAAGTGAATCCTGCGCA	intergenic
622	ASHGA5P038613	1.38744e-05	0.000269325	2.75196	ENST00000444488	TPRG1-AS1	GENCODE	697	chr3	-	188659503	188665428	ATCAGTAATCGCTGTTTGCCAAGCCATCTGGGAGGAGACCAAAGAGCTATAAAATAAGTT	natural antisense
623	ASHGA5P031556	0.00167074	0.00995612	2.74494	ENST00000566734	RP11-1021N1.2	GENCODE	549	chr16	+	15506576	15507125	GATTTTGATGTTGCATTTGGCTACATTTAATCCACTTTCACCCATAAGGTTTAGCATCTA	intron sense-overlapping
624	ASHGA5P023440	0.00510021	0.0235007	2.74374	ENST00000580948	LINC00511	GENCODE	475	chr17	-	70400800	70417365	AGCCCCTTGAACTCTTAGTTGCTGGTGGCTCCCCAGGTGCCACCTCCTGAGTCCTGGTTC	intergenic
625	ASHGA5P054913	0.0258906	0.079614	2.74337	ENST00000545688	SNHG1	GENCODE	610	chr11	-	62620220	62622932	ATAAAAAATGGTAGGTATCTGTTTAAATATTTAACTGATTTTATAATAGCAACCTTTTGC	bidirectional
626	ASHGA5P037830	0.00344841	0.0173411	2.74085	ENST00000411554	LL22NC03-23C6.13	GENCODE	779	chr22	+	22390742	22394463	ACAATAAGATGTCATCACTTAGTGAGGAGAGGAGAGGAGAGCTCAGTAATGGTGGTAGAG	intergenic
627	ASHGA5P047589	1.63703e-05	0.000305332	2.73889	NR_046435	PCGF5	RefSeq	1009	chr10	+	92922768	92987717	CCACCTGCAGATTTGGGTTAAGTGTCTCAATAAAATCTTAAATGAATAAATGCATGGCTA	exon sense-overlapping
628	ASHGA5P045291	0.00739082	0.0310252	2.73805	NR_026668	VPS13A-AS1	RefSeq	442	chr9	-	79791671	79792833	TGACCCCTATGCCTCCACCGAACCACTGACCTAAAATAAATTACAATTACAGATCTTTCG	natural antisense
629	ASHGA5P015929	3.80349e-06	0.000106522	2.73723	ENST00000424938	ZNF833P	pseudogene	1494	chr19	+	11793360	11797005	TTCCAAAAGAAATCTAAGAAGTCATATGGTAGAGAGAGTCTGAAGGTAAGGAAGATGGTC
630	ASHGA5P038927	0.0336946	0.0972008	2.73108	ENST00000495228	RP11-446H18.3	GENCODE	411	chr3	+	106959868	107004511	CACCCCATGGAATTTTTATTCTGACTTTCTTCTGCCTGTGTGGCATTTATGTTTAAATAA	intergenic
631	ASHGA5P016638	0.00203395	0.0115778	2.72885	ENST00000432431	AC023128.1	GENCODE	799	chr2	-	145445979	145447752	CTGAGTTATACAGGAATATTTCACCTCTTCCCTATTTTAAAAAACAACCTCTGCAAAGAC	intergenic
632	ASHGA5P058506	0.0206194	0.067081	2.72312	uc004bab.1	DQ673939	UCSC_knowngene	449	chr9	-	102129369	102131196	CACTTAGCTGTCAATTTGGATTATAGCTTACTGCATTTTTGAGAGAGGAGAGCTGAGATT	intergenic
633	ASHGA5P031182	0.00735491	0.0309245	2.72291	ENST00000565307	RP11-212I21.2	GENCODE	593	chr16	-	55463046	55478671	GGTCTCCAACCTGCAATAAATGAAACATCTGATCCCCTTGAATCCAAATAACTTTTTCTT	intronic antisense
634	ASHGA5P032913	0.0295488	0.0880726	2.72061	ENST00000572818	RP11-160E2.11	GENCODE	1486	chr17	+	19064101	19065587	GGGTCTTGAACACAGTAAGTGCTCGATAAATGCTTGGTAAATACATGAATTATTGTCTGA	intergenic
635	ASHGA5P025876	0.00601654	0.0265905	2.71581	NR_045409	RCAN3AS	RefSeq	336	chr1	-	24822822	24828850	CTAGCACAAGTTGAATTCACCAAATAGAAGACATTGGAAATGAGACCCGAGGGTTGGAGG	natural antisense
636	ASHGA5P014959	0.020384	0.0665793	2.71509	ENST00000415159	AC007179.1	GENCODE	438	chr2	+	59662347	59669396	CTGCTACTTATAGTTTCTGAAGAACCAAGTTATATAGAAAGAAGAAGAAGGTAAAGGCTG	intergenic
637	ASHGA5P032297	0.0146354	0.0521871	2.71146	TCONS_00016037	XLOC_007432	LincRNAs identified by Cabili et al	310	chr9	+	88068943	88069347	TAAAGCCAAACCATTCCAGCCACCCTGCAGATCTACCGAGGAGGAAAACTAATGTTTGTT	intergenic
638	ASHGA5P029323	3.84878e-05	0.000578305	2.70988	TCONS_00010236	XLOC_004700	LincRNAs identified by Cabili et al	1974	chr5	-	1043115	1045405	ACACTAACCCACCCACTTATTCACACACTCATTCACACAACCCAACTTATTCACACACTA	intergenic
639	ASHGA5P054922	0.000551324	0.0043512	2.70935	uc001nvt.3	SNHG1	UCSC_knowngene	2769	chr11	-	62619459	62623357	GTGGAAGTTGCTACGGGGATGATTTTACGAACTGAACTCTCTCTTTCTGATGGATTAGTG	bidirectional
640	ASHGA5P031988	0.00927231	0.0369269	2.7065	ENST00000569362	LA16c-444G7.2	GENCODE	465	chr16	+	88227919	88228823	CTGTGTTGTAATCGCACGCTGATCTCACAATAAATAACGTGTGCATGGAACGTGCCTTCA	intergenic
641	ASHGA5P036083	0.000959877	0.00656921	2.70234	TCONS_00027643	XLOC_013182	LincRNAs identified by Cabili et al	460	chr19	+	58787664	58788877	CTGTTCCCTGCTATGTGTCTGGCTCTTGGTAAAATTTAAAAAAGTTAAAAATTGTTGTGG	intergenic
642	ASHGA5P021509	1.93467e-07	1.1946e-05	2.70219	NR_026691	IL10RA	RefSeq	3802	chr11	+	117857105	117872199	GACGCTCATGGCTCACCTGTTGTGGAAGTGGAAGAGGCTGAAATTGACAGGAACTGACGG	exon sense-overlapping
643	ASHGA5P054439	0.0111106	0.0422622	2.6999	uc001jby.3	LOC100133308	UCSC_knowngene	2397	chr10	-	45594923	45603436	CACCAGATATTGGGAAGCTCACAAAGTTGCAGATAGTAAGTAAGTTATCTAAATTCTTAG	intergenic
644	ASHGA5P039090	0.0126199	0.04641	2.69582	ENST00000463755	RP11-103G8.2	GENCODE	272	chr3	+	150425753	150437782	TGATCTCCTTGTGAAGCAGAACAAGTAATATAAAACTGATCTAAAGAGGCCTCCCCTCTA	intergenic
645	ASHGA5P021539	0.000114409	0.00133751	2.69578	ENST00000534398	RP11-429J17.6	GENCODE	582	chr8	+	144821565	144824305	GCCCCCACAGGGACACCTGGTCGCCATCACATGGACACGCTATTTTTGCACTCGAGGCTA	intergenic
646	ASHGA5P043132	0.000234062	0.00226837	2.69509	TCONS_00019755	XLOC_009549	LincRNAs identified by Cabili et al	360	chr11	-	110962785	110968063	GTGGAACTGAACACAACCCACAGCCTGGAGCTAAACCCAACCTAAGCCAGCCAAGCTCTT	intergenic
647	ASHGA5P022178	0.0120517	0.0448936	2.6928	ENST00000551408	RP11-108M12.3	GENCODE	624	chr14	-	57533725	57579378	TACTCTTTTAATAGCATTGCTTCCCTGTGATCTCTAACCCACCACAATTGAAATGACAAG	intergenic
648	ASHGA5P022344	0.0375463	0.104905	2.69218	ENST00000554926	RP11-187O7.3	GENCODE	632	chr14	-	76961705	77193055	TATCCGGTGTTGTGTGTGTCACAGATGCAATTCAAAATCCTAAGGCTGGAAAACCATTAC	intronic antisense
649	ASHGA5P045256	0.00231137	0.0127865	2.68797	ENST00000417843	RP11-764K9.1	GENCODE	2818	chr9	-	68397877	68401759	CCTAAGTATGGTGAAGCAGAATTGAATTCTACAAAAGTCTTTCATCTGTTTTCCTATGGA	intergenic
650	ASHGA5P023492	0.000915619	0.00632297	2.6853	ENST00000582093	RP11-474I11.7	GENCODE	302	chr17	-	73679622	73680122	TTCTCTAGCAGCCTAGAGACTTCCTGGGGACTCACAGAAAAAATGCTACCAAATCCTGAA	intronic antisense
651	ASHGA5P028238	2.558e-05	0.000420182	2.68511	ENST00000552707	RP11-554E23.4	GENCODE	374	chr12	+	102457132	102468598	CAGTCCAGACTCCATTTTTGCAGTCTACACCAACCAAACAAGCAAAATTAATGTATTTAA	natural antisense
652	ASHGA5P037411	0.00471319	0.0220635	2.68492	ENST00000453784	AP000476.1	GENCODE	2909	chr21	+	25801053	25862621	CTGGGATAAAGATTGCTGCATCCTTATATTCTTGTGTATAAACAGACCCTGTATATGTAA	intergenic
653	ASHGA5P030225	0.0307614	0.0907584	2.66935	ENST00000558365	RP11-561C5.5	GENCODE	452	chr15	-	85858153	85873560	TGGAGCTACCACATGGTCAGGAGGAAGAGACTCACAAAGAAAGATGAAGGTTGCAGAGAG	intergenic
654	ASHGA5P039232	0.024669	0.0768209	2.66782	ENST00000452657	RP11-655G22.1	GENCODE	490	chr3	+	191747668	191754031	AGTTGGATCACCTCTGTCCATTTCACTTTGCTGATATGAGGATATATTGAGAGAGAGAGA	intergenic
655	ASHGA5P037741	0.000239452	0.00230404	2.66585	NR_038957	LOC100506714	RefSeq	1313	chr22	-	45529638	45548465	CCCAACAAATACTGATTTATTTCCTTCTTTTTCCTTGCTCAGAAAAAATTGGAGAAGGCT	intergenic
656	ASHGA5P018034	5.53224e-08	4.808e-06	2.65798	ENST00000448600	RP11-445N18.4	GENCODE	442	chr10	-	45595702	45602526	CAGATAGTAACTCAGCAATAGGGATAAAGACCTGATCTCACTGCTTAAGGAAATTGGGGA	intergenic
657	ASHGA5P054502	0.0164096	0.0566365	2.65705	TCONS_00010774	XLOC_004517	LincRNAs identified by Cabili et al	592	chr5	+	115292238	115294320	AATCCCACCCAGGAAAAGAAGACAGCAAGAAGAAGCCACTTTGAGCCCCTATGATTTCAT	intergenic
658	ASHGA5P021196	0.000159328	0.00170735	2.65685	ENST00000527425	RP11-693N9.2	GENCODE	505	chr11	-	104774243	104788868	TGCTCTTCAACCTCATGTATACGTCTTTTGGTGATAACGTGTCCAGGAGAGACAGCACAA	intergenic
659	ASHGA5P025948	0.00825307	0.0337275	2.65652	NR_047562	PDLIM3	RefSeq	2521	chr4	-	186421814	186456712	AAGATGGGAAAGCCCATCCTTTCAAAATCAACTTAGAATCAGAACCACAGCGAGCCCACA	exon sense-overlapping
660	ASHGA5P017937	0.00328254	0.0167644	2.65553	ENST00000447329	RP4-794H19.4	GENCODE	530	chr1	+	59486058	59498735	CTGATTAAAGTAGAAGCATCATATTTCTATCAACGTATCCACTGTGCTTGGACACAATTG	intergenic
661	ASHGA5P057022	0.0163428	0.0564962	2.65407	TCONS_00012030	XLOC_005561	LincRNAs identified by Cabili et al	438	chr6	+	170462473	170466131	TCAAGAAGCCACCAGCCAGCATGGACATGAGGGAAAACAAAACACTCATGGGAAGAAGCG	intergenic
662	ASHGA5P016877	0.00799184	0.0329613	2.65231	ENST00000508688	HOXB-AS1	GENCODE	414	chr17	+	46622870	46628438	TTTGAAAAAGACCCAATGGTGGTTGGGCTTCGGGTCACGTGACACCTTCTTTGTGGCTCC	natural antisense
663	ASHGA5P029631	9.14654e-05	0.00114042	2.65162	ENST00000554008	RP11-486O13.2	GENCODE	576	chr14	+	70690481	70696825	ATGAGCACACCATTGTTATGTAATAGCCTAACCCTTACCCCTCGCCTATCAGGGGGTGCC	intergenic
664	ASHGA5P016647	0.000264349	0.00247854	2.65159	ENST00000432502	CTA-217C2.1	GENCODE	596	chr22	-	45530170	45559540	ATCGTGTGAGGAACAGAATTGCCATTGGGCCCAGGGAGAGACTACACTTCTTGTCTGCTT	bidirectional
665	ASHGA5P023134	0.000159512	0.00170735	2.6468	NR_047516	ARRB2	RefSeq	1905	chr17	+	4613788	4624795	CCGGGACCAGCTCACCGTGTACTTGGGCAAGCGGGACTTCGTAGATCACCTGGACAAAGT	exon sense-overlapping
666	ASHGA5P057148	3.39292e-05	0.000524386	2.64131	TCONS_00013743	XLOC_006385	LincRNAs identified by Cabili et al	326	chr7	-	26167952	26170398	GTGGTCCCAGCAGCACCTCTGGGCCAGTCCAGCCAGGTGTAGAGTGAAGCTGAGCCCTTG	intergenic
667	ASHGA5P042335	0.00124895	0.0080095	2.6384	ENST00000436804	XXbac-BPG13B8.10	GENCODE	877	chr6	+	29465285	29478333	CAGAGAGAACACTTGGGGCAGATTTTAAGACCTTAGAGAGTAACTTGTTTACAAATAAAA	intergenic
668	ASHGA5P045682	0.0049221	0.0228328	2.63704	ENST00000449144	RP11-384P7.5	GENCODE	1144	chr9	+	33719687	33722553	GGGTAGCGATTATCTGAATAATATGTGCTTCCTGTCTGTAGTGAGGTGTGAACATGGTGG	intergenic
669	ASHGA5P045318	6.1909e-05	0.000837094	2.63379	ENST00000429044	RP11-555F9.2	GENCODE	291	chr9	-	93323310	93344976	AAATCAACCCATGAACTCCTAGTACCCTGACCGCAGCGTATGTAAGATCAATAAATAGCT	intergenic
670	ASHGA5P037376	0.0426742	0.115596	2.62802	TCONS_00024467	XLOC_011789	LincRNAs identified by Cabili et al	3301	chr16	+	74299393	74302955	GAAAATGGCTCCTGGTGTGCAGAACTCCATGATAAATGTGCCCCCTCTAGTTCTTTATTG	intergenic
671	ASHGA5P045929	2.81013e-05	0.000450419	2.6269	ENST00000421509	RP11-281A20.2	GENCODE	523	chr9	+	120545725	120630349	GTGGCACAATAGACATATTACCTTCTTTGGTGGAGTCTGTAAAGACATTACTAAAGTTTA	intergenic
672	ASHGA5P055765	6.81016e-06	0.00016323	2.62686	TCONS_00004873	XLOC_001628	LincRNAs identified by Cabili et al	243	chr2	+	113436308	113437490	CAGCCAAACTGAGCCCTTCTCAAATCCCTGATCCTCCAAATGTAGGCAAAATAAATTGCT	intergenic
673	ASHGA5P021180	0.000628935	0.00480578	2.62452	ENST00000527092	CTD-3074O7.5	GENCODE	828	chr11	-	66240960	66247702	ACAGTATGTCTGTGTGTGCCTTGATCGCATCACCCCCTGGACCTCCAGTGACCGAGATCT	natural antisense
674	ASHGA5P018118	2.76277e-05	0.000446138	2.61963	ENST00000449648	RP11-5N23.2	GENCODE	421	chr10	+	6625640	6626260	GACCTAGTTGAAGTCACAGCTTGGAGGAAACCAGTTTGCACTATTTGATGAGGAATTTGG	intergenic
675	ASHGA5P034163	2.16882e-05	0.000372492	2.61827	uc002obl.3	AL137752	UCSC_knowngene	1694	chr19	-	36238143	36244316	GATGAGAATACTGCAGCCCACAGTAGGAAAGTTATATTTTTGAATTCACGACTACCAGTA	natural antisense
676	ASHGA5P023387	0.000773568	0.0056007	2.6181	ENST00000579944	LINC00271	GENCODE	464	chr6	+	135993451	136037193	TGCCTGTGTGCTGAAGGTAAAGAAATTTCATGTGGTGGATTCCTACAAAAGAAAAAGCTG	intergenic
677	ASHGA5P047614	0.00108481	0.00719528	2.6076	ENST00000421806	RP11-175O19.4	GENCODE	3510	chr10	+	98752206	98755716	TGAGCTTTTTCAAGGCGCTTATTTTATGGCAGCGTATTAAACTTCTTTGATATTCAAGTG	intergenic
678	ASHGA5P038307	0.000695714	0.00519661	2.60533	uc003dou.3	AK025793	UCSC_knowngene	3509	chr3	-	71619435	71623608	CCCTTGGATTGGGGAGAGTCTTACAATGAATAACTCAGAAAAAAGTTTTCAAAATAATCC	intron sense-overlapping
679	ASHGA5P047141	0.00529087	0.0241828	2.60368	TCONS_00017188	XLOC_008000	LincRNAs identified by Cabili et al	243	chrX	+	64295732	64333726	AAGAATTGGGAGTTTTCTGCTGATGATGCTATGCTAAGCTGGGCAGAGAGACCATGGCGA	intergenic
680	ASHGA5P038575	0.00246725	0.0134934	2.60293	TCONS_00023486	XLOC_011331	LincRNAs identified by Cabili et al	2143	chr15	+	82391266	82393834	CCACACTGACACTTGCTGTGCCATTGATTTGACTTTTCTCCTATCTTAACAATAACAAAT	intergenic
681	ASHGA5P033061	0.000419432	0.00357109	2.60087	ENST00000441575	AC069363.1	GENCODE	393	chr17	+	34408991	34417208	GACTAGGGGGCTAAGACCCCTTCTAGAGATAAAAATAAAAGTCTTAAAGAGAAAGACCAA	intronic antisense
682	ASHGA5P041780	0.02087	0.0676891	2.59778	uc010jub.1	AK293020	UCSC_knowngene	375	chr6	-	32546122	32546497	CCAGCCAGCAAGTCAATCAGAACTCTTTCTTCATCTCGTCTACAATATTTTGTATTTATA	intergenic
683	ASHGA5P026501	0.0229637	0.0728757	2.59366	DB299803		LincRNAs identified by Khalil et al	441	chr6	-	79902862	79903303	AGTCGTTCTCCCGAGTTCAAAGTACCATTGACCTTGAAGGGAGAGAAAACTAAAACACAC	intergenic
684	ASHGA5P044216	9.82054e-05	0.00119686	2.58305	ENST00000534914	LINC00467	GENCODE	429	chr1	+	211556144	211570206	CTGCCAAGGGAAAAATTAAGAAGAAGAGAAGAGAGAAAACAAATAAATGGGAAAAAAGAA	intergenic
685	ASHGA5P034947	0.0207275	0.067345	2.58138	NR_028308	BRE-AS1	RefSeq	1667	chr2	-	28112322	28113981	GCCAAATGAAAATTGTTGAGTTAGGTCAGTAAGATTGAGTAGACAGATCCTTCTGATTTT	exon sense-overlapping
686	ASHGA5P028358	0.00871249	0.0351727	2.5806	TCONS_00010712	XLOC_004420	LincRNAs identified by Cabili et al	480	chr5	+	70959258	70966714	CAATGCTTGTAGCAACCAACCCTACCTGGCAACATGTTCTTCTGCAAGCCAGAGGTTACA	intergenic
687	ASHGA5P054802	0.0160915	0.0558656	2.58049	ENST00000525363	RP11-698N11.2	GENCODE	607	chr11	-	35939216	35940289	CACAGGAGCGGTAAGTAGCACTTTATTTTTAGAGAGAGCTTTGGTGAAAAACCATAATGC	intergenic
688	ASHGA5P030282	0.005756	0.0257018	2.57957	ENST00000554649	RP11-255M2.1	GENCODE	715	chr15	-	95577612	95578966	AAACATGCGTGTGTGTACATGAAGCACAACCAGCATTTGGAATATCCTCCCTCAGGCAAA	intergenic
689	ASHGA5P026950	0.00334096	0.0169824	2.57917	ENST00000540226	RP11-598F7.3	GENCODE	586	chr12	-	215689	221016	CTGGAAGTATTATCTTTAGTTAGGGGTATTTCCTTAACTAATAAAGCCTAGCATTGCTGT	intronic antisense
690	ASHGA5P016149	0.0225785	0.0718996	2.57839	ENST00000427292	RP4-794H19.1	GENCODE	219	chr1	-	59361516	59362375	GTGTGACCAGCCCTGTGCCCATCCTGCTGTGATTCAGGAGTCTCGCAGAAGACATCAGAA	intergenic
691	ASHGA5P015879	0.00115973	0.00757595	2.57827	ENST00000424364	LINC00486	GENCODE	691	chr2	+	33066080	33127190	TGAAACTGTGATCTTTTGAATGTAATCCAGGAAAGGAATGGAAAGGAAAGAAGTGCTCAG	intergenic
692	ASHGA5P047408	0.011713	0.0439349	2.56461	ENST00000423283	RP11-123B3.2	GENCODE	435	chr10	+	50627322	50680949	CCAGAACATCAAAGGACAGTCAAAAGCGCTAACCATGAAACTATATTTCTACTAATACAT	intronic antisense
693	ASHGA5P032503	0.00397953	0.0193922	2.56414	ENST00000579033	RP11-433M22.1	GENCODE	333	chr17	-	46454623	46457732	ATCTCAAGATGTTTCTGATGCTGGAGAATCCCTCAAAGTGAGACAGAACTGAAAGCCCTG	intron sense-overlapping
694	ASHGA5P027813	4.50852e-05	0.000656877	2.55435	TCONS_00010172	XLOC_004635	LincRNAs identified by Cabili et al	1125	chr5	+	172199210	172205344	TTCTAGATTCCAAAGGAAAGAGAAAGGAAATATGCCCCAAACTCAGGCTTTCAGCCTGGC	intergenic
695	ASHGA5P017720	0.0434548	0.117294	2.55038	ENST00000445077	AC109586.1	GENCODE	448	chr3	+	28617918	28799086	AGAGAGCAAGAGATGCCATGGACTACAAGGTGATGAATACCACTATGAGCTCACTACAAG	intergenic
696	ASHGA5P051536	0.000226638	0.00221965	2.54969	TCONS_00014763	XLOC_006846	LincRNAs identified by Cabili et al	676	chr8	+	75015624	75019100	TCTGGATGCTTTGACCTGGATCAGTTACTGCTTTGGTTTGTGGCAACATGAAAACTGGCA	intergenic
697	ASHGA5P027227	0.000216458	0.00214097	2.54653	NR_026544	PCED1B-AS1	RefSeq	2502	chr12	-	47602202	47610226	AGGCATCTGGATTCCCTTTGATAACAGTATTCAATAACAATGAACACCTACTGAGTATAC	natural antisense
698	ASHGA5P045308	0.00541964	0.0246152	2.54484	ENST00000415441	XXyac-YM21GA2.6	GENCODE	235	chr9	-	90447688	90452113	AACATTGTGACCATAGTTTATACACTGTACAGTAGCACAACCCTGGTGGCTCTCTCCACA	intergenic
699	ASHGA5P038279	0.000514452	0.00412776	2.53758	TCONS_00023502	XLOC_011346	LincRNAs identified by Cabili et al	544	chr15	+	89943394	89981066	GTTATTTTGTTTGTTTGTTTTGAGACATAGTCACATAGTCTCACTCACCTCCTCCTCTCC	intergenic
700	ASHGA5P056005	0.0422739	0.114727	2.53487	NR_026797	LINC00520	RefSeq	2030	chr14	-	56247852	56263392	GTTAAATACCTCAAATCTTTCGAGAACAGCAAGGAGCAAAATAAACTTAACTTCTCTGAG	intergenic
701	ASHGA5P058460	0.00103866	0.00698562	2.53465	uc003tgm.1	AK096766	UCSC_knowngene	1277	chr7	-	38342348	38344378	CTATTTTAAGTTGCCACCAGACATTACATTCCAGAGCCTTGAGAAAAACTGATGAAAAAA	intergenic
702	ASHGA5P014151	0.000261305	0.0024571	2.52949	NR_027349	MIR17HG	RefSeq	927	chr13	+	92000073	92006829	CCTCTAAAAGGCAGACCTGTCTAACTACAAGCCAGACTTGGGTTTTCTCCTGTAGTTTGA	intergenic
703	ASHGA5P037294	2.41238e-05	0.000404674	2.52938	NR_026812	RUNX1-IT1	RefSeq	1502	chr21	-	36410232	36411723	CCATGTTGAAGTGTAAACTCCACTCAGCTCCAGGAGGAATCGTGTTTTCTTTATCACCAG	intron sense-overlapping
704	ASHGA5P048645	0.0374729	0.10479	2.52888	ENST00000565315	RP11-532F12.5	GENCODE	629	chr15	-	41128005	41136530	GATATAATAAATGCTTATTGTTTCAAGCTGGTAACTTTTGGAATGCATTCACTGAAAAAA	natural antisense
705	ASHGA5P039370	0.00131281	0.00831213	2.52498	ENST00000472346	RP11-293A21.1	GENCODE	327	chr4	-	26861430	26861866	ACTCCAAAATTATCGTTACCCCCTTTTACGAATGAAGAGACTAAGACCTAGAAATGTGAA	bidirectional
706	ASHGA5P041823	0.000134214	0.00149902	2.52314	ENST00000447315	RP11-552E20.4	GENCODE	824	chr6	-	40326482	40337213	TGTCACATCAGGGAACCCGACTCCAGAACCCTCTGTAAATATCCCATGGCTTGGCCCTGC	intergenic
707	ASHGA5P053456	0.0348659	0.0995829	2.5218	ENST00000533300	RP11-159H10.3	GENCODE	431	chr8	+	70746387	70762652	GCATTCCACTGTAAGGTTGAGAAATATCTGATTGTTAGTGATGAGAGAGAAAACCTAGCC	intronic antisense
708	ASHGA5P030636	0.000108579	0.00128933	2.52178	uc002auv.1	AX748294	UCSC_knowngene	2433	chr15	+	72908150	72910583	TGCACATGTGCGCACGCACACACACACACAGCAGAAAATCTAGAAATAAACTATTTTAAT	intergenic
709	ASHGA5P038116	0.00284676	0.0150731	2.52156	uc003byc.1	BC152380	UCSC_knowngene	611	chr3	-	13652923	13653534	TCATAGTTTGCCCTCACCTCTGCTGTAGACAGCCAGCTATCCATCCCAATGTCTGTTTCC	intronic antisense
710	ASHGA5P028211	4.8054e-07	2.3693e-05	2.51989	ENST00000501008	RP11-796E2.4	GENCODE	1898	chr12	+	92539348	92561336	GAGGAGTAGGGGGATATCTTTTAAAAGTTTAATTGCAAAATAAGTAGGTTAGTAAGGCCA	natural antisense
711	ASHGA5P057743	0.000273827	0.00254714	2.51823	TCONS_00021722	XLOC_010305	LincRNAs identified by Cabili et al	206	chr13	+	23507414	23508772	AGAAAAGCGGCCCCCACCTCTGCTGAATGGAGCCCCACCATCCTTCAATGACCAGCTGGC	intergenic
712	ASHGA5P047936	0.00184011	0.0107443	2.51069	ENST00000532541	CTC-497E21.4	GENCODE	1124	chr11	-	13001584	13011084	ATTTCTACAAATATTTCGACATCTCCATATACTCACTCCTTTCCCCCCTGAGTGGAGAGA	intergenic
713	ASHGA5P051089	0.00867601	0.0350657	2.50964	ENST00000465390	AP000221.2	GENCODE	517	chr21	-	26825506	26839042	TGAAAAGGAGTAGGCTGCTAGACTGTGGGTCTCAAAATTCCAGATGAGGAGAGATTTACT	intergenic
714	ASHGA5P026051	0.0285352	0.0856574	2.50632	NR_038908	FLI1-AS1	RefSeq	1319	chr11	-	128561566	128565918	TGCCTCCCCCACTGGAATTATTCAATATGGAACTAGATTAAATTGAAGACTTGCCCTTTA	intronic antisense
715	ASHGA5P018644	4.32471e-05	0.000634373	2.50268	ENST00000455981	RP11-344B5.2	GENCODE	583	chr9	+	132044736	132048007	AAGAGAAAAGAATGTGCCCCTGTGATCATGTGAAAGCATCAGCCAGGGGTCCAAGAACTT	intergenic
716	ASHGA5P034724	0.000435747	0.0036834	2.49998	TCONS_00002935	XLOC_001532	LincRNAs identified by Cabili et al	2915	chr2	+	74378364	74381319	AGGCAAACCTTGGGCATGGGGAGATAAAAGTGAGAAGAGTCAAAAAGATTGATTTCTATA	intergenic
717	ASHGA5P058891	0.00590529	0.0261881	2.49903	uc.447+	uc.447	UCR	273	chr19	+	30767780	30768053	TGGTGTCTAATGATTGGTTTTTTGAAGTAATGAAGAGAGAGCACTAACGACTCCTTGGTG	intergenic
718	ASHGA5P016946	0.00247643	0.0135318	2.49806	ENST00000435925	AC090774.2	pseudogene	246	chr17	+	20859994	20861717	GGATGCCCAGGTGAAGCTGGACTGAATATTTCTGTCCATAAGACTATTAGAATCCCCCAA
719	ASHGA5P014608	0.0011622	0.00758441	2.49746	ENST00000411775	BX004987.3	GENCODE	356	chr1	+	143361976	143375173	TCAATGGAAAAGGAAAAGGCAATGAAAAGAAGAAGCCAAGAAGAACCCTCAAAACCTTAA	intergenic
720	ASHGA5P035605	0.00676977	0.0290386	2.49527	TCONS_00005211	XLOC_002221	LincRNAs identified by Cabili et al	210	chr2	-	99388254	99388552	AACAAGACAACATCTTCACTTCCTGCATGCTGATGGCAGAAGTGAGACATCAGCGAAGAA	intergenic
721	ASHGA5P018335	0.003316	0.0168887	2.4937	ENST00000452249	AC003075.4	GENCODE	441	chr7	-	17325902	17338070	CATTTAACAGTGTTGTGAACCACTTGTCATGGGATAACCAAAATTAAACCTGGAATCGCA	bidirectional
722	ASHGA5P019094	2.53475e-05	0.000418169	2.49227	NR_047680	BLNK	RefSeq	1593	chr10	-	97951454	98031273	TTCGCCAGAGGCTGATTATGTGGTCCCCGTGGAAGATAATGATGAAAACTATATTCATCC	exon sense-overlapping
723	ASHGA5P026274	0.00246216	0.0134712	2.49178	NR_033313	BDNF-AS	RefSeq	1279	chr11	+	27528398	27719718	GCCCTGGAATTCCAGTAATGGTGACCAACATGTTTTAAATTCCAGTAAAGGTTATGGTTA	natural antisense
724	ASHGA5P057490	0.00765297	0.0319033	2.4914	TCONS_00018319	XLOC_008597	LincRNAs identified by Cabili et al	360	chr10	+	105682667	105683570	ATCTGTACTTCTCTGTGTCAGGATGAATGTCAGGATGAATGTCACCACCACCTGCCTTTT	intergenic
725	ASHGA5P031561	0.000207665	0.00206979	2.49052	ENST00000574212	AF001548.5	GENCODE	836	chr16	+	15820530	15826850	GTAATGACTGGCAAACAAATACACAAAGTAATAGAATTGAAAGGATGTCTGTGAACTGCA	natural antisense
726	ASHGA5P028426	0.0269228	0.0819117	2.48918	ENST00000434601	LINC00422	GENCODE	1179	chr13	-	21877650	21922860	GCCTACAGCCTAAATTTTCAAAAACAAGTTAATGCCAGAATATAAACTCCGTGAAGTAAC	intergenic
727	ASHGA5P037191	0.0034128	0.0171993	2.488	TCONS_00026160	XLOC_012574	LincRNAs identified by Cabili et al	245	chr17	-	72530813	72534060	TGTTCATCATCATCTTGTTTTAAGGGATTTGCCACATACATGCATATGGATTTCCAAAGG	intergenic
728	ASHGA5P023479	0.00629693	0.0274523	2.48586	ENST00000581801	LINC00511	GENCODE	379	chr17	-	70319298	70588494	TGGGTGCTTTGAACCAGGAAAGGACAAGAAAGAGGAACTCTGAAAGCCACATGTTGAGAT	intergenic
729	ASHGA5P027812	0.0107943	0.0413622	2.48575	NR_026971	A2M-AS1	RefSeq	2187	chr12	+	9217772	9220651	TATGGACTCTCTGAGGTTTGACAGAGTCAGCGGCCCTCTCCAATAAATGTGTTTTTCTAT	natural antisense
730	ASHGA5P032222	6.76233e-05	0.000897515	2.48258	ENST00000456090	SMCR2	GENCODE	564	chr17	-	17577339	17581002	AGAGACCCTTGGGCTTCCTTCCTTCAAGGCCTCTGGTCTCTAGCAGAGAGAAGAGAGGGA	intergenic
731	ASHGA5P036255	0.0397388	0.109519	2.48071	ENST00000454203	AC010894.5	GENCODE	457	chr2	+	175439954	175452454	ATTTTAAATTCCACAGCAGCAACAGCAGCTCTCATGTATGGAGAATCTGCTGGATCCAGG	natural antisense
732	ASHGA5P033041	0.000448797	0.00377402	2.47891	ENST00000584688	RP11-40A13.1	GENCODE	557	chr17	+	31438875	31458761	TTTTGTAAACACCTGAAGGAGAGAAGAGAGAGAGAGAGAGAAGCACATGGGTAACTTCAG	natural antisense
733	ASHGA5P040421	1.1463e-05	0.000233345	2.47809	uc003jnb.1	AK056817	UCSC_knowngene	2757	chr5	-	42985502	42993435	ATGGAACTGCCATTGCTCAGTAGGAAAATGTCCTTTCTACAAGCATTCATATTTCAATAA	intergenic
734	ASHGA5P055953	0.000760289	0.00554453	2.47657	ENST00000550827	CTD-2384A14.1	GENCODE	777	chr14	+	29299449	29311543	TACTCCAGCAAAACAAAAAAAAGAATGAAAGAAAGAGAAAGATAAAAATATGAAAGAAGC	intergenic
735	ASHGA5P051716	0.00312792	0.0161875	2.4753	ENST00000475393	RP11-103G8.2	GENCODE	621	chr3	+	150421829	150437933	TAAAACTGATCTAAAGAGGCCTCCCCTCTACTCTTATCTGTCTGGTCGAGTCATTTGGGT	bidirectional
736	ASHGA5P045496	0.00073175	0.00539775	2.47491	ENST00000428643	HMGA1P4	GENCODE	334	chr9	-	131425412	131425857	TTTGTCCCAGCCTGGGGCTCCCCCTCTGGTTTCCTATTTGTAGTTACTAGAATGAAAAAA	intergenic
737	ASHGA5P035365	0.0116856	0.0438574	2.47316	ENST00000454537	AC012501.2	GENCODE	427	chr2	-	154278198	154306332	TTGTGTCCAGGGCAGTGTTTATAAACCTGGAACCCATAGTCACTGATGAAGTTTGCACTG	intergenic
738	ASHGA5P057732	0.000658589	0.00498245	2.4729	TCONS_00021289	XLOC_010016	LincRNAs identified by Cabili et al	214	chr12	-	10433067	10443823	TTTAATCAAGGTCCTGGAAATGGCTAGAATCTGTCCTGAACTCTTGGCATCTTCTGATAC	intronic antisense
739	ASHGA5P047957	0.0160337	0.0557547	2.47228	uc009ygt.2	AL833346	UCSC_knowngene	3389	chr11	-	16798843	16802232	CTCCATATGCTGCCAGTATCGACTTCATGACATTTGCCAAAATAAAATTTTATTTTTGCC	exon sense-overlapping
740	ASHGA5P032252	0.0149352	0.0530006	2.47212	ENST00000495691	AC007952.4	GENCODE	440	chr17	-	19067521	19077749	CCAGCCATGGCTGGTCTCCGGGTTCACAGTGATAGGGGAAATAAACCCTTATTTGTCTAA	intergenic
741	ASHGA5P038939	3.33221e-05	0.00051809	2.47168	uc021xcj.1	AX747104	UCSC_knowngene	3171	chr3	+	111442569	111445740	GGCTTTTTACCCCTAGGAAATAATTGTCCAAGTATATATCTCGTCTTCTTTCTTGTAACT	intron sense-overlapping
742	ASHGA5P026749	0.0208543	0.0676552	2.46902	TCONS_00017068	XLOC_008182	LincRNAs identified by Cabili et al	4113	chrX	-	70994969	71004228	TAATGGACTTTTCTTAAAAATGGACAGTATCCCTAAGAATACCCCGTACATTTCCATTGC	intergenic
743	ASHGA5P048150	0.000270789	0.00252613	2.46814	ENST00000533323	AP000640.8	GENCODE	564	chr11	-	59561583	59562189	AGGAATTCTCCTCAACTACCCAACCCAACTCTATCACTTTATGGCAGTCTGTAAACAGAA	intronic antisense
744	ASHGA5P013052	0.000516102	0.00413615	2.4655	uc002zkv.3	AK056135	UCSC_knowngene	575	chr22	-	16187164	16193004	AGGTCTCCGCGGTTCATCTGTGTTGCTCTAAATGACACTGCTTCATTATTTTGATGGCTG	intergenic
745	ASHGA5P029066	0.000259461	0.00244331	2.46527	uc009wka.2	AK094156	UCSC_knowngene	4847	chr1	-	147925822	147930669	GGAAGTGATGAGGACTGTGGCACACTGGAGAGTTTGGACTCCAAGAGTAATTAATTCAGT	intergenic
746	ASHGA5P019356	4.23362e-06	0.000114608	2.44786	NR_028034	FAS	RefSeq	2445	chr10	+	90750287	90775542	AATTCTGCCATAAGCCCTGTCCTCCAGATGTGAACATGGAATCATCAAGGAATGCACACT	exon sense-overlapping
747	ASHGA5P015196	0.0379873	0.105977	2.44742	ENST00000417773	LINC00222	GENCODE	599	chr6	+	109080363	109090321	TCCCACTCTGCTCGTCCCCCTGTTCCTCATGCCCAACCCTTGCCAAGACTTCAGGTAACA	intergenic
748	ASHGA5P016690	0.00186561	0.0108287	2.44716	ENST00000433005	AC003075.4	GENCODE	540	chr7	-	17325898	17338981	GCCAGTACAGTGTTGTGAACCACTTGTCATGGGATAACCAAAATTAAACCTGGAATCGCA	natural antisense
749	ASHGA5P021371	0.00117902	0.00767296	2.44229	uc001phz.3	LOC643733	UCSC_knowngene	1785	chr11	-	104772275	104788902	AGAAGATGATAGGGTGGGACTCATTACGTCTAATCTTGGGGAACACTGATAACGTGTCCA	intergenic
750	ASHGA5P044950	0.00287012	0.0151713	2.44064	ENST00000518749	KB-1107E3.1	GENCODE	361	chr8	+	102698774	102701321	CCTTCTTTTGCCCCAACCCCCGAGTCTTACGTTTTAGAACAGAGACATTAGAATAAAAAA	natural antisense
751	ASHGA5P055761	8.02553e-07	3.3965e-05	2.44054	TCONS_00017335	XLOC_008182	LincRNAs identified by Cabili et al	651	chrX	-	71000376	71004546	ATTTGTCTGAGAACTCATTCTTGGCGTTCACTGCAAGCTATAAGCTCTGCAAGTGGTGAC	intergenic
752	ASHGA5P016735	0.000633931	0.00483825	2.44003	uc001ekv.2	LOC728855	UCSC_knowngene	304	chr1	-	144339562	144340773	AGGACTGCCTGTTTGCAGATTTCAGATACTCAGACTCCACCTTTACTTTTACCTATGTTG	intronic antisense
753	ASHGA5P027567	0.00137237	0.00861353	2.43741	NR_038996	USP30-AS1	RefSeq	978	chr12	-	109489845	109491770	AACGTCTTTAATAGCCAACAAACTTATTGTTTACTTGGGTGCCAGGTATAGAGCTAAGTA	natural antisense
754	ASHGA5P043153	0.036585	0.1031	2.43657	ENST00000416371	AC006014.8	pseudogene	468	chr7	-	75022638	75024555	AAGATTGAGCTGCTTGACTTCCTAGACTGTGCTGAGTCAGACAAGTTTTGTGCTCTCTCA
755	ASHGA5P029792	0.0123554	0.0456968	2.43565	ENST00000557121	RP11-8L8.2	GENCODE	943	chr14	+	101587192	101589879	CTTTAAATATTTAATCCTGAACATCCCTACGAAACAAATAATAAAACAGCCCTAGGCTCC	intergenic
756	ASHGA5P035914	0.04236	0.114888	2.43546	uc021viw.1	FW340055	UCSC_knowngene	2679	chr2	+	70157399	70160078	ATGACACTGTTCTGAATCATGCAGTCTTTGCAAATAACAAGCTGGCTGAAAAATATCTAA	intron sense-overlapping
757	ASHGA5P021941	8.4605e-05	0.00107032	2.43449	ENST00000545177	RP11-420G6.4	GENCODE	1251	chr6	-	2854891	2876744	GCGTGCCTGGGTGGAAAATGAGCTTATATATGAAGAAGTCAGCGAGTGGACAAAGCCAGG	intergenic
758	ASHGA5P047165	0.0018251	0.0106796	2.43415	NR_034125	LOC387723	RefSeq	2686	chr10	-	131862161	131909081	TTCGTTGTTTTGTGGATGTACCCAGGGCTATTTACACACTCTTTCATTAAAAGGCTTATT	intergenic
759	ASHGA5P032181	0.00982703	0.0385909	2.41992	ENST00000582915	RP11-597M12.1	GENCODE	335	chr17	-	12893465	12893927	AAAGGAACAAACAAAACCTGCACCACCAGCATCACCACACGGACTGGAGATCACAATTTT	natural antisense
760	ASHGA5P017742	0.000625079	0.00478477	2.41984	ENST00000445272	RP1-28O10.1	GENCODE	381	chr1	-	209834708	209848592	CTCCGACTGTCTGGACCCTGGGTACCTGGCTGAAGACTTTGGACTTTAACCTGGAGATGA	bidirectional
761	ASHGA5P044084	1.49358e-07	9.684e-06	2.41909	ENST00000515608	CTD-2541M15.1	GENCODE	2147	chr8	-	6475995	6506328	CACACACAACACACACACACATTTATGATAATGCTTGTTCTTAACCAAAAACTGAGATCT	natural antisense
762	ASHGA5P026714	0.00203711	0.0115856	2.41532	ENST00000529567	FOLH1B	pseudogene	2145	chr11	+	89372394	89431767	CATGTTTCTGGAAAGAGCATTTATTGATCCATTAGGGTTACCAGACAGACCTTTTTATAG
763	ASHGA5P026212	1.63929e-05	0.000305332	2.41097	ENST00000527726	RP11-483L5.1	GENCODE	372	chr11	+	11591630	11595329	CCTATCTCCTATATTGTATCCTCATCATGGTCTCAATAAACCCACTTGGAAGATGCCCAT	intronic antisense
764	ASHGA5P015739	0.00993716	0.0388821	2.41092	ENST00000423083	NCF1B	GENCODE	1516	chr7	+	72634673	72649979	AGCTGTTGAGGAAAGACGACGTCACAGGCTACTTCCCGTCCATGTACCTGCAAAAGTCAG	intergenic
765	ASHGA5P048931	0.00254048	0.0137891	2.41045	uc002bwp.3	BC073817	UCSC_knowngene	3257	chr15	-	101453408	101459488	GAACGTGATAGAAATGCGTAATTTGTTAAAGCGAATTACAGCTCTGATTTGTCAAATGAG	natural antisense
766	ASHGA5P015230	0.00068567	0.00514233	2.40984	ENST00000418192	BX284650.1	GENCODE	209	chr1	-	143743239	143744355	GAGGACTGCCTGTTTGCAGATTCAGATACTCAGACTCCACCTTTACTTTTACCTATGTTG	intergenic
767	ASHGA5P040924	1.98236e-06	6.4735e-05	2.40661	ENST00000562870	CTC-205M6.5	GENCODE	3088	chr5	-	180211781	180214869	GTCATCTAGGAGACTGGTTCTATTATTTACGTAGATGTTCTTGAATTAAAGGATGGGAAT	intergenic
768	ASHGA5P033371	0.0285371	0.0856574	2.40326	uc002jok.3	AF289551	UCSC_knowngene	2374	chr17	+	73561173	73563547	TCAGGGGCCAGGTCAGGGCTCACAGACTGTTGCTATAAAGGGCTGGGTGGCTTTCTTCCC	intron sense-overlapping
769	ASHGA5P015584	0.000322687	0.00290049	2.40097	NR_047543	CDKN2B-AS1	RefSeq	1939	chr9	+	21994789	22121093	ATTTTGACAGATTGGCTTCTCTCACATGGCAAGAAACATTGCTGCTAGCACTTCCCGAGT	intronic antisense
770	ASHGA5P038853	0.00410945	0.0198537	2.39704	NR_038286	PSMD6-AS2	RefSeq	2555	chr3	+	63989697	63997917	TTACAATTTTATGGATGTTCGAAATTTAAAAAATACTAGAAAGAGAATGGTCTTATTTAA	intronic antisense
771	ASHGA5P015335	0.00247771	0.0135318	2.39645	ENST00000419400	RP11-383C5.4	GENCODE	446	chr10	-	127389005	127396118	GAACACAAAGGAGAGATGAGAGGAAGTTAGAGGGGCTAGAAGAACCAGGAGACCTGTTGA	intergenic
772	ASHGA5P042029	0.0264758	0.0810654	2.396	ENST00000450483	RP1-86D1.3	GENCODE	1658	chr6	-	128768788	128770446	CCAAATAAAAAGAGGCCTTTGCTTTTGTGCTACAGGCGTTTCTTATCTTTAGGAAGAATG	intron sense-overlapping
773	ASHGA5P044232	0.00153148	0.00933208	2.39538	ENST00000412871	RP11-354K1.1	GENCODE	1204	chr1	+	211813036	211827923	CATCAATCTAATAGGGATCCTTATTTTCCCAGCCACCAAGTCACAATGAGCAATAATCTC	intergenic
774	ASHGA5P035988	6.57193e-05	0.000876032	2.39313	ENST00000443770	ANKRD36BP2	GENCODE	503	chr2	+	89065459	89073085	CATCTTCTGATTACCAGATTGAGTTTCTGCATGTGTGTGTGTATCTCTGATTAAAAATGA	intergenic
775	ASHGA5P035160	0.0213405	0.0688707	2.3914	ENST00000449242	AC012307.2	GENCODE	197	chr2	-	96811340	96812751	GGCTCTGACCCCAGCACACACAAGCTCCAGCTCCTTCTCACACATAGTGGAACTGCACAG	intergenic
776	ASHGA5P054917	0.00938656	0.0372789	2.38518	ENST00000537024	SNHG1	GENCODE	532	chr11	-	62621018	62622951	AAGTAGGCAGTTTCTATGATGAATCAAACTAGCTCACTATGACCGACAGTGAAAATACAT	bidirectional
777	ASHGA5P035380	0.0174488	0.0591834	2.38296	ENST00000439577	RP1-20B21.4	GENCODE	311	chr1	+	17733255	17733878	TTCCCCTTCACGCTAAGCCTCTTTCAAATTCTTTTTCCTGAGCTGGAAGACCAGTCAGAT	natural antisense
778	ASHGA5P047886	8.46498e-07	3.5408e-05	2.38018	ENST00000526769	GVINP1	GENCODE	544	chr11	-	6742640	6767650	CTACTCTCCATGCACGTCTCTCTGGAGCAACCTGAAGACAGGATCTTGGCCTCAGGACAG	intergenic
779	ASHGA5P020533	0.0199217	0.0653579	2.37878	ENST00000515350	RP11-471J12.1	GENCODE	3273	chr4	+	174451608	174463082	ATTGGCCAAGTGCATGTTAGCGGTTTGCTGGATTTCCCTTCTCCCTCGCTGTTCAACTGC	bidirectional
780	ASHGA5P030254	0.00112798	0.00742839	2.37706	uc002bow.3	AK055981	UCSC_knowngene	2023	chr15	-	90617746	90619769	AATTTCTCCCAGATCTTAACGTCAGGGCTGTCTGGCCCTTTCATGAGTATGTGGGTTATA	intronic antisense
781	ASHGA5P025983	0.00516588	0.0237455	2.37328	NR_047683	BLNK	RefSeq	1474	chr10	-	97951454	98031273	CACAGAAAGCAGTTCACCTCCACCTGAAAAAGGAAAAAACCAACGACACCACTGAAGACA	exon sense-overlapping
782	ASHGA5P030476	0.0284892	0.0855733	2.37151	ENST00000434098	RP11-85G21.2	GENCODE	156	chr1	-	157257492	157257843	GGGAACTGGGCTGTATCTTTTGAAGACATGTGGGAAGAAGAAGAAGAAGATGATGAATAT	intergenic
783	ASHGA5P048449	0.000676596	0.00508604	2.37069	AA583819		LincRNAs identified by Khalil et al	257	chr4	+	25090390	25090645	TACACAAAGCAATTTCAGCCTTTTCAGATGAGAAAAGAGCAGCCCCGGCCGTCATTCATT	intergenic
784	ASHGA5P052015	0.0427145	0.115672	2.36869	NR_037884	LOC100507053	RefSeq	4827	chr4	+	100010007	100222513	GAGTAATACAAATGGTATGTTTGTCGCAATATAAAAGTATCTAAAAATTAAAGAGTTCTT	intronic antisense
785	ASHGA5P027498	0.000302249	0.00274843	2.36745	TCONS_00012358	XLOC_005917	LincRNAs identified by Cabili et al	400	chr6	-	166253091	166253578	TGGGGATGGCAGTGATGAGGATGGAGCAATTTAGAGAAATAGAGAGAGCCCTTGAACCAG	intergenic
786	ASHGA5P040181	0.00990715	0.038788	2.36431	uc003imp.1	BC040914	UCSC_knowngene	1509	chr4	+	153021969	153025789	AACCAAATTTCCTGGACAGGCTTCAGAAAACATTCTCCCTGGTGATACAGACATCTGAAA	intergenic
787	ASHGA5P021418	0.00675385	0.0289979	2.36387	ENST00000532061	RP11-532E4.2	GENCODE	391	chr11	-	1263525	1269227	TTGTGAGGATCCAGTGGACGCAGTCGTAGTGGCTGTTGTGGTCGGCTTTGTGAGGATCCA	natural antisense
788	ASHGA5P057730	0.00728789	0.0306925	2.36242	TCONS_00021260	XLOC_009959	LincRNAs identified by Cabili et al	470	chr12	+	132148445	132149209	AGTCACCATGGACCCCTCCCCTCCCATGGCTTTGAGCCCATGAGATGGCCTTGGACAAAG	intergenic
789	ASHGA5P055252	0.000482256	0.00394288	2.36179	ENST00000545357	RP11-664D1.1	GENCODE	558	chr12	+	4008218	4019472	ATGGCTTTTGTCATTTGAATTATCAGTAGCTGTCTCGGAGCTATTACGCTTCACTGGGCC	intergenic
790	ASHGA5P020328	0.012158	0.0451771	2.3609	uc003iwy.1	BC016366	UCSC_knowngene	632	chr4	-	185765736	185776806	CACCTGCCAGCAGATGCCCCTGCAGGCCATCTCTCCAGGCTCAGGAACCTAAAGAAGAAT	intergenic
791	ASHGA5P045920	5.96487e-07	2.7723e-05	2.3565	ENST00000442008	RP11-116G8.5	GENCODE	595	chr10	-	5566938	5567705	AAACAGGGAGAAGGCCTCCTTGAATTCTGTGACCTGCTCCTCAGTCAGCTGGTCGGCCAT	natural antisense
792	ASHGA5P031032	0.0413083	0.11272	2.35443	ENST00000567401	RP11-105C19.2	GENCODE	1666	chr16	-	22621851	22623517	TTCCTTCTAAAAGGTCATTTTATTACAGTAATGGGCAGGGTAGACATACCTCACTAGCGT	intergenic
793	ASHGA5P037922	0.000792234	0.00569136	2.35035	TCONS_00025086	XLOC_012044	LincRNAs identified by Cabili et al	612	chr16	-	86302609	86338058	TGTATATCATCTCTGTACCTGAGCCCCTAACCTGCAAGTCATAATAGGCAACGGATCAAT	intergenic
794	ASHGA5P037881	0.0143751	0.0515065	2.34927	NR_033320	MIAT	RefSeq	10119	chr22	+	27053445	27072440	ACATGATCCCATCTGCTCAGATCTTCATGTCAGAACACGCTTTATTACAGTCTCGGCAAG	intergenic
795	ASHGA5P014931	8.48586e-06	0.000186186	2.34731	ENST00000414894	RP11-5N23.2	GENCODE	365	chr10	+	6625637	6627641	GACCTAGTTGATACAAGTTAACAGGATATGCTTCTGGCCTGTTTCTGGATTCTAAGGGTA	intergenic
796	ASHGA5P022186	0.00132544	0.00834458	2.34604	NR_046159	LOC256021	RefSeq	2205	chr12	-	92378751	92535489	TTACCTTCCCCAGACAATTGAGCTGAACCTGTATCTGCGACCTCTGACTATGTGAAGATA	exon sense-overlapping
797	ASHGA5P017148	8.00861e-05	0.00103287	2.34555	ENST00000438195	RP4-794H19.4	GENCODE	306	chr1	+	59486259	59510286	TTCTATCAACGTATCCACTGTGCTTGGACTCTGTAATATTCACCGGCAGGAAAACCCAAG	intergenic
798	ASHGA5P037416	0.000300996	0.00273896	2.34437	NR_001458	MIR155HG	RefSeq	1500	chr21	+	26934456	26947480	CAACTCTTCTCAACATTTTGTCCAGGTTATTCACTGTAACCAAATAAATCTCATGAGTCT	intergenic
799	ASHGA5P044050	0.00335297	0.0170035	2.34324	ENST00000447563	AC004863.6	GENCODE	3824	chr7	+	158801044	158815371	TGGAACTGCAAACTCTGTATTATCTCCCCTTTTGTGAAATTCTATGGAAAATTCGAGCAA	intergenic
800	ASHGA5P019308	0.000226947	0.002221	2.34052	NR_036462	APITD1	RefSeq	1431	chr1	+	10490803	10502872	GAAAAGTTGCAAGAACACGAGGCTAAAGGCAGCAGTTCACTATACTGTGGGTTGTCTTTG	exon sense-overlapping
801	ASHGA5P035758	0.0196722	0.0647436	2.33878	ENST00000431650	AC012457.2	GENCODE	466	chr2	+	25427181	25432071	AGTGTTCACCGCTAGAAGTGTTCCCTTGTCAAAGAAAGAAGCCATCCCTTGTCAGTAGAT	intergenic
802	ASHGA5P017579	0.00339643	0.0171568	2.33828	ENST00000443347	RP11-374M1.2	GENCODE	931	chr9	+	45108391	45112532	GTGGGACATCCGGCTGGGGTGATGTAAAATTCTCAAACAATGAGATAGATAAAAAGTACG	intergenic
803	ASHGA5P057980	0.00170503	0.0101279	2.3351	TCONS_00024646	XLOC_011938	LincRNAs identified by Cabili et al	1963	chr16	-	51421605	51559447	TGGAAACATCAACATGTTGCCAGATTGGTATACGACTCAACACCACACTGACATGCTGCT	intergenic
804	ASHGA5P055040	0.00467786	0.0219377	2.33301	ENST00000528075	RP11-21L23.3	GENCODE	336	chr11	-	76493624	76494106	AGGCAGCAGTTTCAGTCTATTCCCCCTGCTGTAGCTCTTGGGCTCTCACCCCTCTTTATG	intronic antisense
805	ASHGA5P055725	0.00671504	0.028909	2.32998	ENST00000542070	LINC00442	GENCODE	1518	chr13	+	19582398	19586157	GCCTCATCAGCCAGCCTGCATGAGCCTCTACATTTGTTCCTGGCTTCTCCATGGAACTCG	intergenic
806	ASHGA5P031033	0.00751141	0.0314499	2.32893	ENST00000566098	RP11-105C19.1	GENCODE	375	chr16	-	22623863	22624804	AACCTGATCATTATCATACTTATGCCTAGACACAAGAGAGGCAATAAACTAATCTAAGTG	intergenic
807	ASHGA5P039404	0.0321785	0.0939349	2.32623	ENST00000563286	RP11-121C2.2	GENCODE	4218	chr4	-	47842138	47846356	GTGGCTGAAGTTTGCTCTGTAAAATCACCGTTTCCTGAGGTATATTCAATATCTTTAATT	intergenic
808	ASHGA5P046200	0.0183736	0.0614057	2.32622	TCONS_00002376	XLOC_000814	LincRNAs identified by Cabili et al	476	chr1	-	44498209	44499602	TTCAAACCAGAATCTTTCTCACAAGTGTCTCCTCAGGACACAGCTGTGTGGTTTCCTGAA	intergenic
809	ASHGA5P019165	2.77424e-05	0.000446484	2.32149	ENST00000470997	HLA-DPB2	pseudogene	776	chr6	+	33080292	33096861	TGTGGAGTGGACATCTTCACGCACAGAAGGAGGAAGAAAGTTCAACAAGGATCTGCATAA
810	ASHGA5P028437	0.0137789	0.0498188	2.32147	ENST00000420140	LINC00357	GENCODE	1059	chr13	-	25511013	25512491	TCTGCTTCCACTTACTTTATTTTTGAAGACACTAATTGCTACACTGAATAAAACCTTAAT	intergenic
811	ASHGA5P035544	0.0392345	0.108639	2.31951	TCONS_00004303	XLOC_002153	LincRNAs identified by Cabili et al	272	chr2	-	71063564	71088005	TCTCCTGGCTTGGCCTCTGGGACTGGTTTAGGAGGAGGATTTGCAAGTAAGGAGGAGAGC	intergenic
812	ASHGA5P049201	0.00189381	0.0109581	2.31859	uc021thk.1	IGH	UCSC_knowngene	377	chr16	-	33752510	33752887	GCTATGTGTGGCAGTTTCTGACCAGGATGTCTCTGTGTTTGCAGGTGTGCAGTGTGAGGT	intergenic
813	ASHGA5P041809	0.00564362	0.0253928	2.31845	uc003onw.3	AY927499	UCSC_knowngene	1100	chr6	-	37618994	37620094	GTTTGATGTAATGTGCAATGGGACTCATGGAAGTCTTCAAAAGACCCTCTGATTGGGCAA	exon sense-overlapping
814	ASHGA5P048646	0.0182753	0.0611865	2.31482	ENST00000568525	RP11-532F12.5	GENCODE	470	chr15	-	41130536	41136498	GAGAAGCTGGGTGAAGCCATCTTGCATCTTTAGCCCCAGTCAAGTTACCTCAGCAAAGAC	natural antisense
815	ASHGA5P057893	0.0275932	0.0834618	2.31374	TCONS_00023350	XLOC_011212	LincRNAs identified by Cabili et al	261	chr15	+	36782441	36799342	ATTCACCACGGCAGCACATCACCTCCAGAGTGAAGAAAAGTTTCAAACATCAGGAAAAAA	intergenic
816	ASHGA5P028567	6.13247e-05	0.00083185	2.31196	BM728564		LincRNAs identified by Khalil et al	568	chr1	+	210425878	210426445	TACAGGAAGGAAATGTGACAGCACAAGCCGTTCGCCATCACCCAGGAGCTGTCAGCAGCT	intergenic
817	ASHGA5P045750	0.00983487	0.038599	2.3091	ENST00000425587	RP11-561O23.8	GENCODE	340	chr9	+	70843566	70844228	GGCAAATCAACTGTTAACTTTGCAGTTTTTATTTAATCTCCCAGGAATGTAACCCTTAAC	intergenic
818	ASHGA5P035948	0.000767279	0.00556761	2.30535	uc021ojb.1	RCAN3AS	UCSC_knowngene	277	chr1	-	24822822	24828850	AGGTGTCTGTTGCAGCCAAACACAATCCCAACTGATATTCACTGTAAATGATTCCATGGC	natural antisense
819	ASHGA5P026566	0.0323223	0.0942137	2.3039	ENST00000529069	RP11-119D9.1	GENCODE	600	chr11	+	67653947	67661564	GGCACTTTGAGCTACAGATGAGTTTAAATACTTTGTGTTTTTCTTAGTCAAACATGTGCA	intergenic
820	ASHGA5P021435	0.00676641	0.0290338	2.30362	ENST00000532340	RP11-750H9.5	GENCODE	566	chr11	-	47405094	47430741	AATTCAAAAGTCCCTAGAGCGTCCAAGATTTTTGGTTTCAAACCAATTTCCTGCTGACCA	intronic antisense
821	ASHGA5P015662	0.000338346	0.00300708	2.30092	NR_029394	TBXAS1	RefSeq	2111	chr7	+	139528951	139720125	TTTCTATTATGTACTATCTTGGTCGTCGGATGTTTATTGTTATTTCTGAGCCAGACATGA	exon sense-overlapping
822	ASHGA5P026018	0.00209927	0.0118576	2.29938	NR_073032	SPRED3	RefSeq	5006	chr19	+	38880931	38890523	CCTCAGCCAGACAACCTTGGAGTGTACACTGAAGCCAGGCTTGGTTTACAACAAGGTGAA	exon sense-overlapping
823	ASHGA5P023156	0.00147262	0.00909742	2.29841	ENST00000571595	MIR22HG	GENCODE	767	chr17	-	1615544	1619635	GGAGCTGCTTTCCCCATCATCTGGAAGCATCTCCCTCCAGCCCTCGCTATGTGCCTCTGC	bidirectional
824	ASHGA5P027945	4.94669e-05	0.000708226	2.29807	ENST00000552063	RP11-493L12.4	GENCODE	277	chr12	+	47642918	47651322	GAGCGTTTCTGATCCAGCTCCCCGTTTTTAATAAGGAACTCTTCAACAAGAAATAAACTC	intergenic
825	ASHGA5P022701	0.0046996	0.0220078	2.29682	uc002boc.3	LOC283761	UCSC_knowngene	1434	chr15	-	90048160	90067265	CTTGTGACAGCTGCTCGTGGCATGCCCTTCTCCACTAAGCCAACTTGTTAAACCTCTTCA	intergenic
826	ASHGA5P016953	0.0168331	0.0576836	2.29482	ENST00000435988	NCF1B	pseudogene	1254	chr7	+	72634680	72649821	GTGGAGAAGAGCGAGAGCGGTTCTGGCACAGGTTGGTGGTTCTGTCAGATGAAAGCAAAG
827	ASHGA5P047818	0.00563584	0.025375	2.28793	NR_026642	FAM99B	RefSeq	1066	chr11	-	1704499	1706859	GCAGCCCCCAGGGCCCCTGCTGGGAAGAGGTCAGAACCTCCCAAGGACCCAGAAGGCCAG	intron sense-overlapping
828	ASHGA5P025982	0.000119678	0.00138066	2.28657	NR_047682	BLNK	RefSeq	1536	chr10	-	97951454	98031273	GAGTATATAGGCTGATTATGTGGTCCCCGTGGAAGATAATGATGAAAACTATATTCATCC	exon sense-overlapping
829	ASHGA5P018037	0.0294694	0.0879269	2.28527	NR_026927	LOC115110	RefSeq	2216	chr1	-	2481358	2484284	TTTGTGATTCAGGAAAGAAAGCACGCAGCCAAAGAGCGCAAAGAGGCTCAGAGGAGGCCC	intergenic
830	ASHGA5P022694	6.00577e-06	0.000149763	2.28497	ENST00000560973	RP11-761I4.3	GENCODE	273	chr15	+	81616778	81634051	TGCATTAGAGCCTATCTCCCAGGACTATGGAAGCCCCATGCAGGAACATGGTTCTGACAC	intronic antisense
831	ASHGA5P049112	4.69156e-05	0.000679726	2.28307	uc002djl.3	RRN3P1	UCSC_knowngene	1149	chr16	-	21821749	21831731	CATATCACAGAGCCTTGCAAATAATAGCAAGATATGTACCATCATGAGTATACTTTTCCT	intergenic
832	ASHGA5P028733	0.0125804	0.0463437	2.28106	ENST00000450973	TPTE2P6	GENCODE	649	chr13	+	25161361	25171814	CCTGCCATGTGCATGTTCATATGTCCTAAGTCTTCCTTGATGATGTATCTATATTTATAT	intergenic
833	ASHGA5P031877	0.0171072	0.0583068	2.27866	TCONS_00006601	XLOC_003209	LincRNAs identified by Cabili et al	4004	chr3	-	107732833	107757940	TTAACACTGCACAGCTTGTGAGAAATATGACTCTCCACCCTGCACAAACTCTGGTGACTT	intergenic
834	ASHGA5P032052	0.000252914	0.00240435	2.27488	TCONS_00016018	XLOC_007412	LincRNAs identified by Cabili et al	356	chr9	+	77791048	77794685	TCACCAATCCAGTGCTCACTTATCCATGTCAGCTCTTTAAGTCATGTCTGAGATCCCTGA	intergenic
835	ASHGA5P019394	0.00385279	0.0188953	2.26847	ENST00000481762	ZNF767	GENCODE	357	chr7	-	149255876	149318241	CCCAGTCCAGTTTAGTACTGCTAAACTAAAGTAGATTAATGAGAAGGGAGAGAGAGCCAA	intergenic
836	ASHGA5P036778	0.015555	0.0545808	2.26731	ENST00000439232	SNORA71B	GENCODE	136	chr20	-	37053842	37053978	CGCTTCCCCGTGTTTGAAGGGTCCACTCCTATCCCTTCCAAACTCTGGAGCTTTCGTACA	intergenic
837	ASHGA5P047705	0.00296119	0.0155457	2.26564	ENST00000420207	RP11-25C19.1	GENCODE	483	chr10	+	114447363	114511234	CTCCCTGCTGTTTCCCTAATCATGTAGAGGAAAGCAACAATGTTCAGTAATTAACTGTTT	intron sense-overlapping
838	ASHGA5P039661	0.0103224	0.0399911	2.26346	TCONS_00022504	XLOC_010829	LincRNAs identified by Cabili et al	3245	chr14	+	52536229	52540595	TGACATTTTTAAGTAGAGAGAGGGTTGGTGTGGCAGACACTATTGGAACCTCTCCCAACA	intergenic
839	ASHGA5P029630	0.0396683	0.109372	2.26164	ENST00000555480	RP11-486O13.2	GENCODE	566	chr14	+	70653839	70696904	TGATAAATTGAAACCAGTTTTAATTCTTCTGCCCGGGAGACCTAACCGCCGAATGCGTTC	intronic antisense
840	ASHGA5P021417	6.48684e-06	0.000157847	2.26074	NR_034174	VNN2	RefSeq	1479	chr6	-	133065008	133079022	TTACCATAAGGAAACCTTACAGTCTGTCAAAAGGAGCTTTGCTGTCATTTAAGCTACAGA	exon sense-overlapping
841	ASHGA5P042496	0.0241826	0.0757428	2.25632	ENST00000445310	KCNQ5-IT1	GENCODE	563	chr6	+	73340222	73388282	ATTATTCAATTATTAAATAAAACCTTGCATTAGTGGCATTTCCAAATGCATAACAAAAAA	intron sense-overlapping
842	ASHGA5P027723	0.0180436	0.0605674	2.25482	ENST00000432195	RP4-575N6.4	GENCODE	403	chr1	-	101701238	101702084	CCGGCAGATGTGAACTCAAAAACTTCCTCCGCTGTGCAGTTTCAATTGGCAGACACACCC	bidirectional
843	ASHGA5P029387	0.00183428	0.0107188	2.25248	ENST00000497397	RP11-731F5.2	GENCODE	548	chr14	-	106114260	106115394	TCAGCGGGATGAACTCACACTCCCCTCCCTGCACCATGAGTGAGAGCCAGCTGGAGAGAC	intergenic
844	ASHGA5P057881	0.00358766	0.017879	2.25142	TCONS_00023134	XLOC_011081	LincRNAs identified by Cabili et al	744	chr14	-	77540151	77541059	AAGTTGGAAGAGCAGCCCTGTGGATCTAATATAGTCATAAGAGACATTGTGACCTCCTCC	intergenic
845	ASHGA5P057211	1.31091e-06	4.8155e-05	2.24936	TCONS_00014652	XLOC_006742	LincRNAs identified by Cabili et al	1539	chr8	+	23086939	23088598	ATGTGTCCAGCCATTTCTTCTTGGTTCTGGTTCCGTGTGTACTGCATGATATTGTACCAC	intergenic
846	ASHGA5P044958	0.000577154	0.00450532	2.24934	ENST00000517983	KB-1507C5.4	GENCODE	563	chr8	+	103991012	104012412	GATTGTCACAGATTTAGCATGAAAGCCATGTATTTAACATTCCTATGTAATAACCCTCTC	intergenic
847	ASHGA5P036553	0.006979	0.0296516	2.248	uc002vwe.1	AK023507	UCSC_knowngene	1794	chr2	+	237478467	237480261	GAGAAGGTATTATGATTTCTAATCAGGCCCAGAACAGGCCAAGTATAGGCTTTCTGAATG	exon sense-overlapping
848	ASHGA5P057174	5.72652e-06	0.000144337	2.2473	TCONS_00014042	XLOC_005955	LincRNAs identified by Cabili et al	849	chr7	+	389823	391347	ACACACACACACACAAGACACGACTTCACACAACGTCCAAAACTCATGCTCACACACATC	intergenic
849	ASHGA5P040556	0.00151155	0.00926289	2.2448	uc011cub.2	LINC00461	UCSC_knowngene	3359	chr5	-	87960262	87974262	ACCCACCCTCTTCCCCAACACCCACCTAGCCAGCGAGTCACCGAGCCACCGGCCCTCGGG	intergenic
850	ASHGA5P039503	0.00330051	0.0168362	2.24349	ENST00000510795	RP11-168E14.1	GENCODE	511	chr4	-	95664950	95678684	GGCCATAGACACTTTTCAGAAATTGATAAAACGTTGACACACCTTGTAAAAAATGAACAC	bidirectional
851	ASHGA5P047238	0.00454853	0.02153	2.24291	ENST00000561822	RP11-5N23.3	GENCODE	697	chr10	+	6628185	6628882	AAACAAAACCACACCTGGATTGCCTGGTACTTAAATAAAATGCACTATGATGATTGAAGA	intergenic
852	ASHGA5P019014	7.45623e-05	0.000978511	2.23992	NR_051975	CREM	RefSeq	2344	chr10	+	35415768	35501886	TTTAGCTCAGCTGCCACTGGTGACATGCCAACTTACCAGATCCGAGCTCCTACTGCTGCT	exon sense-overlapping
853	ASHGA5P044388	0.00372522	0.0184019	2.23833	ENST00000522817	GS1-251I9.4	GENCODE	4275	chr8	-	92072136	92082351	ACAGTTCGGTGCTGAAAAAAGCATTTCTATTAAACTTCAAGACAGAATGAATGACCATAG	bidirectional
854	ASHGA5P022408	0.0157408	0.0550164	2.23737	NR_038852	LOC503519	RefSeq	741	chr15	+	26360959	26378184	TTACATACTTATGCTACGTGGAAGGCTGGGTGGCGTGACTTCAGAAAAATGTTTCCTCAG	intergenic
855	ASHGA5P031673	0.0026726	0.0143799	2.23544	uc002dzu.3	BC073928	UCSC_knowngene	1123	chr16	+	30887232	30906539	GGTTCCCTGGGCATATGTATTCTGTGAAAATCCATCACATGACTTAAATAAAATGTACAT	natural antisense
856	ASHGA5P025953	0.00569887	0.0255612	2.23317	NR_047626	UTY	RefSeq	5768	chrY	-	15360258	15592550	CTCCGCTCAGGAATCCAGGTAAAAATGGCTTGTCTAATAGCTGCATTTTGTTAGATAAAT	exon sense-overlapping
857	ASHGA5P025666	0.0127215	0.0467139	2.23157	NR_024469	LOC100130987	RefSeq	850	chr11	+	67085309	67159158	GCAACTCAAGGGTCCTCAAGGTCATAGAACCCCATAACCCCATTAGGTGTCAGGGGCAGA	intronic antisense
858	ASHGA5P022162	0.0232774	0.0735472	2.23117	ENST00000550905	RP11-438N16.1	GENCODE	589	chr12	-	114117263	114211486	TCGACACATGAAACAAGGTCTCACTCTATCACCCACCTGGAGTATAGTAGCACGATCATG	intergenic
859	ASHGA5P053071	0.00753805	0.031533	2.231	uc022acj.1	BC041623	UCSC_knowngene	867	chr7	-	45008119	45008986	ACGATTTAAGGTGACTCACATCAAGGTATAAGTGTTTCATGAGAACTTCTCAAGGAGAGG	intron sense-overlapping
860	ASHGA5P041578	0.00493763	0.0228829	2.22948	ENST00000358442	RP11-423H2.1	GENCODE	515	chr5	+	177309443	177348388	ATCAAAACAACCTCATTGTTCTCAATGACTGACCTTATAATAAGTAAATGTTATAGAACA	intergenic
861	ASHGA5P019693	0.00255255	0.0138287	2.2276	uc003idi.4	AF085995	UCSC_knowngene	456	chr4	+	120433527	120473183	CCAAATGCCTTACTTGACAGGATCACAGAATGTGAATTTTGAACAGATCTGAAAAGTTAT	intronic antisense
862	ASHGA5P034905	0.0171848	0.0584868	2.22715	ENST00000400892	NPPA-AS1	GENCODE	936	chr1	+	11903917	11908136	CTCAAGAGGCTCCCACTTCAAAGGTGTGAGAAGAGTAAAAAAGAGTCCTTGGTTATCTCA	natural antisense
863	ASHGA5P043719	3.26067e-05	0.000508798	2.22497	NR_026690	ABHD11-AS1	RefSeq	473	chr7	+	73149398	73150330	CACCCGGACAGAACCCTCCCTGGACCAAGTCCTCCAGGAACGGGATGAAGCCATTGCCAA	intergenic
864	ASHGA5P057046	0.0170011	0.0580446	2.22133	TCONS_00012238	XLOC_005794	LincRNAs identified by Cabili et al	412	chr6	-	105374368	105379376	ATGATCTCAGGCTCTTGGGTAACCCCCTCCCACACCAACTCTGAGTTTGTTTATGGCTTG	intergenic
865	ASHGA5P027051	0.00546019	0.0247647	2.22059	TCONS_00012375	XLOC_005942	LincRNAs identified by Cabili et al	452	chr6	-	170337138	170337952	TTTCCTGGACATGTGGAAAGATGGATGTGTGGATGGAGAGGTGACACACGCGCGGACGGA	intergenic
866	ASHGA5P034600	0.00195093	0.0112194	2.22016	AY665172R		LincRNAs identified by Khalil et al	286	chr12	+	89937979	89938265	ATCTCAGACTGCATGTAGAGAACGTATGCCTTGAGAGATAAGTGATGTCTGCCATTGATT	intergenic
867	ASHGA5P045034	0.00921235	0.0367559	2.21845	ENST00000524100	RP11-473O4.5	GENCODE	917	chr8	+	130844546	130856750	GCACACTGCATCACCACACTCACTTATCAAGAAAAGGCCAATATTATCTAATATACGTGA	natural antisense
868	ASHGA5P054291	0.011906	0.0445044	2.21651	TCONS_00013713	XLOC_006364	LincRNAs identified by Cabili et al	856	chr7	-	19039115	19040901	CCTTTTCCAGTTTTCTTTCAGGTGAGAGTTCATGCTTGTGGGTTTGACTCAAAGACATCT	intergenic
869	ASHGA5P041900	0.0308492	0.0909115	2.21125	ENST00000413945	LINC00472	GENCODE	662	chr6	-	72054046	72129806	CCACCCCATCCCCTTATTGAACAATTACGATGCCTATAAATATTGTATTGAGAAAGAAAA	intergenic
870	ASHGA5P044707	0.00515905	0.0237225	2.20669	NR_033928	LOC389641	RefSeq	1970	chr8	+	23082733	23088439	TGAGTCAGCTGTCGTTCATATCTTTGTTACCTGTGAATGCACAAAATTTGCTCTGTATGA	bidirectional
871	ASHGA5P031987	0.00647048	0.0280705	2.20639	ENST00000563521	RP11-863P13.1	GENCODE	409	chr16	+	88210894	88212053	TACTCGGAAAGAAAAAGGTATCAGTTTTCCATCAAGGCACTTCCCATCTCAGACGTGGTC	intergenic
872	ASHGA5P058607	0.00157917	0.00954939	2.20633	uc010xck.2	AK309717	UCSC_knowngene	1115	chr18	-	37421137	37504804	TTCAGACATAGTTAAAATCTAAAAGAAAAAAGAAAAAAAAGTCCAACATTCAGAATCCCC	intergenic
873	ASHGA5P022866	0.0322778	0.0941612	2.20594	ENST00000568419	RP11-532F12.5	GENCODE	629	chr15	-	41128194	41136482	ACCTGCGCAGAGCCAGCTGTGATGTAAAGAAGTTTGTGCTGCATGAGAGAGATAGCACCT	natural antisense
874	ASHGA5P000016	1.8355e-08	2.088e-06	2.20474	AI091628		LincRNAs identified by Khalil et al	438	chr18	-	8695853	8707229	GTTCCTACAGTGACAACTGGACCTGGCCCGAACCCCTGGCATCTGGCAACATTATTACCT	intronic antisense
875	ASHGA5P038970	1.23037e-05	0.000246207	2.20209	NR_038266	MYLK-AS1	RefSeq	771	chr3	+	123304402	123349666	CAGGAATGACTTTGTGACCAGCAGCTTAAGCCAAATAAACTTTATAAGGTAAAGAATTTC	intronic antisense
876	ASHGA5P051869	2.35943e-05	0.000397334	2.19933	NR_024569	LOC100130872	RefSeq	5001	chr4	-	1189570	1202750	TTTTCTGATATTTGTGCCATTTATTTGGTTTTTCTATTAAGTTTGCCAGAACCTCCGAGA	exon sense-overlapping
877	ASHGA5P018486	0.00762889	0.0318493	2.19352	NR_028040	GATS	RefSeq	2874	chr7	-	99798277	99869855	TACTTCAATGGGGCCTTGGTGTACCTTGTTGTAGTGTTTGAAAACATCTGAGGCTGCATC	exon sense-overlapping
878	ASHGA5P038991	0.000288906	0.00265315	2.19304	ENST00000427243	RP5-1033H22.2	GENCODE	639	chr1	+	94057806	94067997	CAAAAAGACAGATCCACATCTCAAATCCACTGAACTCTGGGAATCCCTGTGATGACCTGA	natural antisense
879	ASHGA5P026587	0.0268041	0.0816849	2.18834	ENST00000530525	RP11-805J14.3	GENCODE	497	chr11	+	69975402	69995729	AATGAATTCTTCTTAACCTATCCATCTTTTGTGCCAGATACATGCAGTACCTACACCCCA	intron sense-overlapping
880	ASHGA5P056282	0.00241109	0.0132533	2.18565	TCONS_00001745	XLOC_001120	LincRNAs identified by Cabili et al	262	chr1	-	183118843	183119157	AGGAGAGGGGTGTGGGCTGGGTGGGGTGTGAGCTGTGTGGTGTGTGAGCAGGAGAGGGGT	intergenic
881	ASHGA5P031357	0.00480102	0.0224019	2.18517	ENST00000421851	RC3H1-IT1	GENCODE	448	chr1	-	173978404	173985344	TTTATCTTGAAGTAGATAGTGTCAACAAATACAAAAATAAAAATAATGTCTTTAAATGAG	intron sense-overlapping
882	ASHGA5P036142	0.00244649	0.0134082	2.18415	NR_033903	CCDC74B-AS1	RefSeq	1835	chr2	+	130887195	130896986	GATACCTGCTTCATCGTGTGCTTTTATGTAAATGCCAAATAGCAAAATAACAGCTAGAAA	natural antisense
883	ASHGA5P029189	0.042729	0.115672	2.17643	NR_046321	GPX2	RefSeq	1310	chr14	-	65405869	65409623	CCATCTCTTCAGCCTAGCAAGTTGCTGGAGGGAGTCTATAACCTACCAGGAGCCAGCCAG	exon sense-overlapping
884	ASHGA5P023056	0.00944524	0.0374546	2.17159	ENST00000568735	RP11-173B14.5	GENCODE	467	chr13	-	76178961	76210130	GCAAGAGATCAACAATGATTACAAAATTGCTAAAGAAGTCACTTTCAAGAGATCTGGAGA	intronic antisense
885	ASHGA5P021201	0.00621068	0.027189	2.1704	ENST00000527483	RP11-383C5.4	GENCODE	764	chr10	-	127389004	127408029	CTTCTGTGAGGTATCATTCTGATCATTGTTGTTACAGGAGAGATGAGAGGAAGTTAGAGG	bidirectional
886	ASHGA5P019549	2.4756e-05	0.000411553	2.16666	ENST00000491264	HOXB-AS3	GENCODE	478	chr17	+	46679499	46683756	GAGCTGGCAAAACCCACTAACCAACCAGGAGAACACAGACCCGCCGTTTCCTCTCCCTCG	intronic antisense
887	ASHGA5P039110	0.0245427	0.0764646	2.16558	ENST00000472913	PLCH1-AS2	GENCODE	408	chr3	+	155203591	155204910	AAATTAGGATCCTTACCCCCACCTCCACGCCCTTGCTGACAGATATGAAAATAAACTTTA	intronic antisense
888	ASHGA5P042848	0.02212	0.0708234	2.16372	TCONS_00019201	XLOC_009034	LincRNAs identified by Cabili et al	247	chr11	+	3536783	3542040	TGAGTTTAAATACTTTGTGTTTTTCTTAGTCAAACATGTGCAATTAAGCATGTGATAAAT	intergenic
889	ASHGA5P028576	0.000789514	0.00567627	2.16233	ENST00000424640	RP11-423O2.7	GENCODE	967	chr1	-	142950834	142956716	TCCACAGTGGGTTAGTGGATATTACAAACCTCTGGTCCCACCTTATTAAGATGGAAAAAA	intergenic
890	ASHGA5P018820	0.00529668	0.0242008	2.16176	ENST00000457976	RP11-305L7.3	GENCODE	506	chr9	-	93881419	93925369	GGACTTGGAGATCAAAGAAACTCTAGTAACGTGGAAATTCATGCTCCGAGTAGTGACAAG	intergenic
891	ASHGA5P044986	0.00936811	0.0372284	2.1611	ENST00000445339	RP11-552D4.1	GENCODE	654	chr1	+	230138476	230142909	CCTTCCCTGAGAGAAGTGTATTTAATCTTAAATTCAGATGTTTGTTTGTCTACCCACTTA	intergenic
892	ASHGA5P026651	0.021122	0.0683186	2.15981	ENST00000527314	RP11-619A14.2	GENCODE	613	chr11	+	75901768	75906115	ATTGAGATGTCACCCCTGCTTCCCCAATTCCTTCTGAATATACCAGCTGACAGCCACACT	natural antisense
893	ASHGA5P031067	0.000755517	0.00552288	2.15829	TCONS_00007046	XLOC_002932	LincRNAs identified by Cabili et al	394	chr3	+	177483364	177484684	ATTTCCTTATGACACCTGAAACTCTGATGCCTTCTGGGTCCATGAAAGCAGTGAGATGAG	intergenic
894	ASHGA5P058170	0.00968154	0.0382199	2.15753	TCONS_00027288	XLOC_013290	LincRNAs identified by Cabili et al	448	chr19	-	30185929	30187465	TGTCTGGGTGTCCAAGTGTCCAGGTGTCAGGTGTCTGGGTGTCAGGTGTCTCGGTGTCCG	intergenic
895	ASHGA5P000039	0.00127331	0.00812551	2.15572	AK022848		RNAdb	3614	chr11	-	89927673	89931288	CGTGAGATGATGTGAAAGGAAGTTTTGCATCATTTACTTGAAAGATACTGTTCTTCTGAA	intergenic
896	ASHGA5P018138	0.00156438	0.00948797	2.15487	ENST00000449852	RP11-126H7.3	GENCODE	487	chr10	+	79687129	79689582	GAAAAGAAAGAATAGGGAAATTTGGATGCAGAGACACAGAGAAAATGCCATGTGAAGATG	bidirectional
897	ASHGA5P052199	4.5911e-05	0.000665915	2.15359	ENST00000499554	CTD-2547L16.1	GENCODE	1052	chr8	+	17942376	17953903	ATCTCTGCTTTCTCCTAACCCCCATCTAATCTCCAAAAAATCAGAGCATGTCACTCCTGG	natural antisense
898	ASHGA5P042828	0.00210351	0.0118747	2.1534	ENST00000457217	RP11-222A5.1	GENCODE	1809	chr1	+	175846478	175849604	AATTCTTTCAACTCTGAGCCTTGGCTTCCCTTCTATAATATAGGCTAAGAGCACCCACCT	intergenic
899	ASHGA5P052218	0.00509869	0.0235007	2.15313	ENST00000510986	GDNF-AS1	GENCODE	1941	chr5	+	37873526	37875901	GGTTTCTCAGTCACGGAAGAATAGAAGAACAACTCAGAGGAGGAAGAAGTCAGACATAGC	intergenic
900	ASHGA5P004477	0.00192951	0.01112	2.15156	NR_047560	IKZF3	RefSeq	9644	chr17	-	37913967	38020441	GGGGACACTGGTACTGGTTGGGGATGGGTCGAGCTTTCCCATCTCGGCATAAGACTGCAA	exon sense-overlapping
901	ASHGA5P040891	8.27338e-06	0.000184012	2.14934	ENST00000502767	RP11-458I7.4	GENCODE	484	chr1	+	150131599	150136916	AAGCCATGACAGCAAACAGCCCCTTTCTCCTAAGGTTCCTGATTTGAAGTGGCAAAACAA	exon sense-overlapping
902	ASHGA5P039542	0.0249846	0.0774691	2.14532	ENST00000510212	RPL34-AS1	GENCODE	562	chr4	-	109511518	109541616	CTTCTTTATTGAAGGAGCGGGAGAAGAGTAAGAAAGTTGGAGCAGACTAAGAAGACAGGA	bidirectional
903	ASHGA5P058630	0.000975881	0.00665663	2.14266	uc011hzu.2	HLA-DQB	UCSC_knowngene	779	chr6_mcf_hap5	-	3961838	3964231	TTCCTCGGGCTGGGCCTTATTATCCATCACAGGAGTCAGAAAGACCTCAAGGGCCTCCAC	intergenic
904	ASHGA5P021327	0.0244204	0.0762416	2.14008	ENST00000530169	CTD-2516F10.2	GENCODE	501	chr11	-	7449176	7487053	GTTCAAGGGGATAATTCAATACAAGAAAGAAGATTTGCTTGGGAAGGTCTGAATGGCCCT	intronic antisense
905	ASHGA5P017918	2.63507e-07	1.5119e-05	2.13788	ENST00000447119	RP11-790G19.2	GENCODE	613	chr10	-	72976980	72977969	AATACACATTCTCACCCCCCACACACTCCTTAATACATACTCTCACTTGGAGAAGTGAGC	intronic antisense
906	ASHGA5P019669	0.046742	0.123594	2.13752	ENST00000524338	RP11-16M8.2	GENCODE	561	chr8	-	57432936	57472382	GTAACTTCAGGTGGAGCCCAGTTGACAGGAAATGTTTCTCCAGAAGCTGAAAAGCTGCCT	intergenic
907	ASHGA5P051526	0.00321636	0.0165305	2.13343	uc001elb.4	AK094156	UCSC_knowngene	4848	chr1	-	144514872	144519720	ATATTACTGTGAGGTTTTAAAAGTACACAAATAACAATTGTTTTTTGTAAAAAGAAAAAA	intronic antisense
908	ASHGA5P047345	0.0374597	0.10479	2.12857	ENST00000446211	RP11-51B10.2	GENCODE	302	chr10	+	35104694	35105314	GGGAACGTAACTGAAGCTCATTTTGTCTTAGTTATGGACTATGAGTCCTTAATAAATGTA	bidirectional
909	ASHGA5P025975	0.00123817	0.00795213	2.12349	NR_047628	UTY	RefSeq	5816	chrY	-	15360258	15592550	GTTTCATACAAGACAACTGCAATAAAGAATCCAGGTAAAAATGGCTTGTCTAATAGCTGC	exon sense-overlapping
910	ASHGA5P019884	0.0197698	0.0650318	2.12032	NR_038303	LOC100505702	RefSeq	4300	chr4	+	79567147	79605655	TGCCATCCATCTGTCAGTAATAGATTCAGAAATGGTGCTGGCAGAGGAAACAGCAGCAAT	intergenic
911	ASHGA5P041631	0.0119409	0.044596	2.12028	uc003mtr.3	AK024936	UCSC_knowngene	1940	chr6	-	1727166	1729106	CAGGGATGCATTGAATGGTTAATTAGGTTACAAAACTTATTCCCAAATGGAATGTGTTGA	intron sense-overlapping
912	ASHGA5P015052	0.000471494	0.0038917	2.12012	ENST00000417670	AC108868.4	pseudogene	633	chr2	+	107103882	107123396	GGGAGTGGCCATGCACCTGTGCTGCCGGCGGAGGAGAGCCCGGCTTCGTTTCATGAAACA
913	ASHGA5P035154	0.00367028	0.0182079	2.1201	TCONS_00004618	XLOC_002527	LincRNAs identified by Cabili et al	459	chr2	-	238037369	238039886	AGAGACTCACATGCACTCAAAAATTTGCTTACACTCACAAATGTCACACACTCATGCACT	intergenic
914	ASHGA5P021126	9.26345e-05	0.00115388	2.11729	NR_034173	VNN2	RefSeq	1719	chr6	-	133065008	133079022	TTACCATAAGGAAGTGGTATTTATGCACCAAATGGTCCCAAAGTGTATCATTATGACATG	exon sense-overlapping
915	ASHGA5P027041	3.54599e-06	0.000101106	2.11569	NR_034140	LINC00612	RefSeq	2236	chr12	-	9208184	9217666	TCCCTGCAATACAGATACTGAATGAGGTTGGCAAATAAATATGTATTTCTAGAGACTCTA	intergenic
916	ASHGA5P058403	0.00585505	0.0259968	2.112	uc002qnp.1	BC036412	UCSC_knowngene	2129	chr19	+	57276711	57311014	GCTTTGCAGTTGTGTGCGAGTGTGTACAGGGACAGAGTCCTGAGCAAGGAAACCTAGAAG	natural antisense
917	ASHGA5P043368	0.00519716	0.0238539	2.10851	ENST00000467537	RP5-894A10.2	GENCODE	770	chr7	-	141352180	141356610	CCTGCCATGTCTTAAGGAACTCATATACATAGTCTTTCTATATTATGCTAATCCTTCTCA	exon sense-overlapping
918	ASHGA5P031645	0.0160026	0.0556787	2.10762	TCONS_00006704	XLOC_003318	LincRNAs identified by Cabili et al	363	chr3	-	166641737	166643655	ATATGAAGCAGCAATAGCAACAGAAGAAAAGGCAGTGACATCACCCTCAGCTTGTTGGAG	intergenic
919	ASHGA5P040353	0.0347238	0.099288	2.10682	ENST00000512978	CTD-2023M8.1	GENCODE	238	chr5	-	18704541	18746282	TTTGTGGCTCTTCACGAAGATAAATATTTATCACCAAACAATGTAAACTTCCCACATGAC	intergenic
920	ASHGA5P022588	0.00610679	0.0268612	2.10538	NR_034039	SORD	RefSeq	2898	chr15	+	45315301	45367287	TGGGATCATCGGTAAAGCACCTAAAACCAGGTTGGAAAACAAAGAACCAGACCAAAGAGC	exon sense-overlapping
921	ASHGA5P058631	0.00447041	0.0212414	2.10504	uc011hzv.2	HLA-DQB	UCSC_knowngene	645	chr6_mcf_hap5	-	3961838	3964231	GTGGAGTGGCGGCTCCTGCACTGACTCCTGAGACTATTTTAACTGGGATTGGTTATCACT	intergenic
922	ASHGA5P035068	0.049248	0.128646	2.10263	ENST00000448204	AC114752.1	GENCODE	289	chr2	-	64557619	64559265	TTGTCCTGCCACTGTCTGGCTGCCCTCTAACCCTCTACTAATTAAAGCCACCATTTGCTA	intergenic
923	ASHGA5P039563	5.8059e-05	0.000795826	2.1013	ENST00000441170	AC092661.2	GENCODE	1663	chr4	-	118495666	118497329	TTTCAGACATGGTGAATGCATCGACTGGAAGCTCCTTTTTCTCCACCTCTCTCAATACAT	intergenic
924	ASHGA5P017632	0.00196186	0.0112714	2.09838	ENST00000443988	AC018730.1	GENCODE	675	chr2	-	105424030	105467911	TAAAAACCTAACCCTGGAAGTTTGCTCGCTGCCTGAAAATCATATGCGTGGTTTTTCCTG	intergenic
925	ASHGA5P038974	0.000201182	0.0020333	2.09822	ENST00000568966	RP11-71H17.7	GENCODE	2534	chr3	+	124442634	124445168	GATGACCTGCTGTCTTGTTACTGCTACAGTAAATGTTATAAGTTATGGATGAAACTTCAA	intergenic
926	ASHGA5P015946	0.00919535	0.0366993	2.09673	ENST00000425076	RP11-342M1.3	GENCODE	536	chr1	-	43307568	43312058	TTAGAAGAAAGAAAGAGATGACTCCTGCTTCATAGTCCAGGAAAATCCCCACACACCGTG	natural antisense
927	ASHGA5P049954	8.06512e-06	0.000181126	2.09634	ENST00000582375	RP11-143J12.2	GENCODE	770	chr18	-	9121262	9136643	ATTCTGCACATCTCCCTACACCTTAGTGACGGTTAAATAAATAATTATTAAGCTTCTGGA	intronic antisense
928	ASHGA5P047236	0.0186377	0.0620795	2.09525	NR_036502	LOC439949	RefSeq	2253	chr10	+	6622386	6627323	TCCTGTTACAGTGCAAAGAAGAAATGGCAAACGGATAACAGCTACTGTGCCTAGAAGATG	bidirectional
929	ASHGA5P039155	0.000809394	0.00578114	2.09058	ENST00000467896	RP11-185E8.1	GENCODE	229	chr3	+	171185872	171187422	ATGGCAGGGCTGAAAATGATTAGTGTTAATTCATTCCAGTTGTGTTACCCTACCCATAAG	intergenic
930	ASHGA5P053428	7.50191e-05	0.000982599	2.09038	ENST00000449589	GAS5	GENCODE	712	chr1	-	173833153	173837127	CCATTGGATGTGCCACAATGATGACAGTTTATTTGCTACTCTTGAGTGCTAGAATGATGA	bidirectional
931	ASHGA5P055688	0.0210204	0.0680577	2.0897	ENST00000480427	RPL22P19	GENCODE	441	chr12	-	125420000	125420441	AAATTAACCAGGACGAAGAGGAGGAAAACGAGGATTAAATTTCATTTATCGGCCGGGCGC	intergenic
932	ASHGA5P048184	0.0279421	0.0843598	2.08962	ENST00000537965	SNHG1	GENCODE	578	chr11	-	62621839	62622960	GTTTTCTGGTTCCTCTTGTTCTCTGTAGTGATGTTTCTAGATAGATGCCCACTGATATAT	bidirectional
933	ASHGA5P056798	0.000117737	0.00136434	2.08958	TCONS_00008738	XLOC_003422	LincRNAs identified by Cabili et al	992	chr4	+	1548980	1550300	CCTGGCCCAGGCCAGCAAAGACAATCGCCGGATGTCTGAGTACCCCCTCTCCTTCCAAAA	intergenic
934	ASHGA5P019043	0.0346646	0.0992266	2.08834	NR_028033	FAS	RefSeq	2583	chr10	+	90750287	90775542	GAAGGACATGATGTGAACATGGAATCATCAAGGAATGCACACTCACCAGCAACACCAAGT	exon sense-overlapping
935	ASHGA5P029596	0.035275	0.10042	2.08574	ENST00000419578	RP1-13P20.6	GENCODE	1997	chr1	-	152902515	152921686	GTAAGGCAGCTAATATTTCTGTCACACAGAGAAAAACAAATTGATAATGCAGTACAAGGT	intergenic
936	ASHGA5P041774	0.0322597	0.0941296	2.08273	ENST00000419679	SAPCD1-AS1	GENCODE	461	chr6	-	31732086	31733365	TTTAGCTGTTGAGTTAAGAAACAGAAAAAGGAGCCTGGGGCTTCTGACTCTTTCACCAGG	natural antisense
937	ASHGA5P042920	0.0424999	0.115196	2.08152	ENST00000439046	AC019117.2	GENCODE	589	chr7	-	17474100	17500296	AGAAGGAATTCTTGTTAAAAATGCCTCTGTTGTATCAAGTGGCTGTAAAACAGGCAAGAG	intergenic
938	ASHGA5P020835	0.00411664	0.0198726	2.08044	ENST00000520554	RP3-399L15.3	GENCODE	568	chr6	+	114291117	114314627	TGGCTAAAGTGAAGGAGTCTGTAGCTTTAGGGGAAGACAGAGCCACAAGATGGAAGGAGC	intronic antisense
939	ASHGA5P056051	0.000326039	0.00291971	2.07625	ENST00000445805	RP4-594I10.2	GENCODE	420	chr1	-	24863137	24865371	GACTATATTCTTAAAGAATAAAAGTACTGCACTTCACCTCTATCTCCTGGTATCTCTTCA	natural antisense
940	ASHGA5P047458	0.000194601	0.00199006	2.07576	uc001jpa.1	BC022313	UCSC_knowngene	1062	chr10	+	70847867	70848929	TGTCCTAGATTTGTTTCGTCAAAGCGACTTTTGGTTGTCATGATCTTACTTCCGGTGGAG	exon sense-overlapping
941	ASHGA5P051246	0.0192437	0.063559	2.07466	uc002zxm.3	GUSBP11	UCSC_knowngene	2377	chr22	-	23995355	24051428	CAGTGGACCCCATCATGGAGAAGTTCAACACATCCAGCCTACGACCAGCACCTGTGGGAG	natural antisense
942	ASHGA5P020773	0.0248058	0.0771175	2.07122	ENST00000519655	RP11-37B2.1	GENCODE	1407	chr8	-	90621628	90769955	CAAGGACACAGTGCTAGTATGAATGAATAATAATGGGGTTGTCTATGAAGAGGAGAGAAT	bidirectional
943	ASHGA5P054268	0.000164689	0.00174471	2.07036	TCONS_00013287	XLOC_005955	LincRNAs identified by Cabili et al	1258	chr7	+	389256	390969	ACTCCACACAACGTCCAAAACTCACGCTCACACACATCAAAACACAACTTCGCACAACGT	intergenic
944	ASHGA5P055042	2.27693e-05	0.000387467	2.06824	ENST00000532906	RP11-689N19.3	GENCODE	531	chr11	-	76835552	76837196	AAGATTTATTGAGAATAGAACAGGCTTCCTGTCCCCTAACCCTGTGGTGGATCCTGAGAA	natural antisense
945	ASHGA5P038893	0.00536661	0.0244429	2.06608	ENST00000485219	RP11-373L8.2	GENCODE	433	chr3	+	88206038	88217879	TTGGGAACCCATTTAACATCATCTACAGGTAGATTTTTTGGTGACCTGAGTGAAAAGTTT	exon sense-overlapping
946	ASHGA5P029032	0.00716177	0.0302793	2.06601	ENST00000399886	DHRS4-AS1	GENCODE	857	chr14	-	24409571	24422578	GGCAAATGTTTTGAGACTGCCCATGGAGGTGAGGCCTGTGGTCGCCATGGAGTCCACCAG	bidirectional
947	ASHGA5P029549	0.0141003	0.0507039	2.06595	ENST00000554055	RP11-841O20.2	GENCODE	581	chr14	+	53107556	53108284	GAGCCAGTAGAAGGTGACAAAGTAGAGGTAAGAATATTCCTTCAAAAAGATTGGCAGCTA	natural antisense
948	ASHGA5P035341	0.0472262	0.124413	2.06504	ENST00000546678	RP11-570L15.2	GENCODE	506	chr2	-	144053154	144329674	TTGTTCTCAGCTTCCTTCTCCCCTGACATTCTCAGTACCTCTCTATTCATGAAATCCTAC	intronic antisense
949	ASHGA5P056799	1.06675e-05	0.000220615	2.06137	TCONS_00008739	XLOC_003422	LincRNAs identified by Cabili et al	734	chr4	+	1549138	1550198	TGGCCCAGGTGCCAGCAAAGACAATCGCCGGATGTCTGAGTACCCCCTCTCCTTCCAAAA	intergenic
950	ASHGA5P053398	0.0058129	0.0258757	2.05981	ENST00000436285	GAS5	GENCODE	772	chr1	-	173833038	173836181	GTAGGGCAAATTTTAAATGGGTATTATTTTTCATCTTCAAACAGGCAGACCTGTTATCCT	intergenic
951	ASHGA5P035516	0.00286296	0.0151403	2.05891	ENST00000474886	CFLAR-AS1	GENCODE	223	chr2	-	202005006	202008919	AAATACACTATCTGTTAAGCTGTGTCAGTAGCTAAGTCTGTGTGTCTAAATTAAAAACAT	natural antisense
952	ASHGA5P045583	0.000146787	0.0016004	2.0567	ENST00000428088	RP11-885N19.6	GENCODE	538	chr9	-	141090382	141093775	AGATCACTGTTGGAGGAGGGCCCGGCACCTGCACCTGAGGACATGAGTCTAATAAAAGAG	intergenic
953	ASHGA5P055282	0.0240275	0.0754576	2.05601	ENST00000536679	ABC12-49244600F4.3	GENCODE	550	chr12	+	7261166	7263066	ATCCCTACAGCCTCCCGCGCAGCCTGAGCTCTAGGATTGTGGGTTTTCCATCCTCCGAAG	intronic antisense
954	ASHGA5P041332	0.0242683	0.0759378	2.05524	ENST00000565823	CTB-36H16.2	GENCODE	2178	chr5	+	122168050	122170228	ACTGAAGCCAGTCAAGGTGAATACACAGAAAATCATTTTCTTATTAAGGTCAGTTAATGG	intergenic
955	ASHGA5P026753	0.00334958	0.0169996	2.05182	ENST00000542119	RP11-817J15.2	GENCODE	743	chr11	+	102478097	102498801	GCAAAGGTCTGCTTTCTTTCTATCATTCTTGTATCAACTCTAAATTGAAACCCAAATCAC	intronic antisense
956	ASHGA5P038682	0.0111651	0.0424197	2.05068	ENST00000449023	SRGAP3-AS4	GENCODE	377	chr3	+	9298442	9299191	ACATACCTACCATGTCCTGCAATCTAGCTTAAAGCTTACACTTTAAGAAACAGAATAACA	intergenic
957	ASHGA5P015871	0.00152247	0.00930187	2.05018	ENST00000424308	RP4-794H19.4	GENCODE	152	chr1	+	59486270	59488692	TCTATCAACGTATCCACTGTGCTTGGCAGGGGATGGGCCCTTCTGCTGCAGCATAAGAGG	intergenic
958	ASHGA5P000555	0.0275754	0.0834469	2.04874	chrX:136212300-136224525-	chrX:136212300-136224525	LincRNAs identified by Khalil et al	12225	chrX	-	136384634	136396859	GTTGCTGAAAACTCCATCTGAATCCCATAACCCATTCCTCTTAGTTCCTGGGGACACAAA	intergenic
959	ASHGA5P018565	0.00170841	0.0101387	2.04775	uc001vvv.1	AK056135	UCSC_knowngene	570	chr14	-	19919491	19925333	GGTCTCCGCGGTTCATCTGTGTTGCTCTAAATGACACTGTTTCATTATTTTGATGGCTGG	intergenic
960	ASHGA5P035520	2.20123e-06	6.9959e-05	2.04673	TCONS_00004289	XLOC_002133	LincRNAs identified by Cabili et al	360	chr2	-	65282663	65283317	AGGCTCTCCGAACGCCTTTCACTGTGTTTCTGTTTACATTCGCGTCTGCAAGACCCGGCG	intergenic
961	ASHGA5P035517	0.001929	0.01112	2.03856	TCONS_00004286	XLOC_002131	LincRNAs identified by Cabili et al	675	chr2	-	65196935	65197921	CCAAGCTGACATGTTGAATATGGACTTCTTTAAGGGCATGATGGCAAACATCCTCATTGT	intergenic
962	ASHGA5P033552	0.000471105	0.00389097	2.03815	ENST00000581648	RP11-178F10.3	GENCODE	543	chr18	-	22096846	22097970	CTCCCTGAGGGCTGTTCTGCCAACCTCACGACACCATCATAGAAGACTTCAGAGACTGAC	intergenic
963	ASHGA5P046575	0.0187366	0.0623607	2.03757	NR_034004	LOC100132741	RefSeq	1064	chrX	+	70917045	70923256	ATATCTGGTGGCAATTGGGGAAACTTCTGAGAAAGTAAGACAGACATGGATGTTGGGGTG	intergenic
964	ASHGA5P026362	0.0181516	0.0608354	2.0349	BG926920		LincRNAs identified by Khalil et al	665	chr5	+	148836893	148837488	TCAATAAATCAGAATGTAAGCCAAGCAGCCACCAGAGGCTGACAAGCATATCTGTGGACT	intergenic
965	ASHGA5P031229	0.0127616	0.046808	2.03365	TCONS_00006925	XLOC_002746	LincRNAs identified by Cabili et al	573	chr3	+	106967129	106970413	AATGGAGAGGAAGCCAGAGAGACAGAGTCCTCAGAATACATAAAATTTCTGGCCTCCATG	intergenic
966	ASHGA5P054915	0.000467796	0.00388567	2.03271	ENST00000535689	SNHG1	GENCODE	550	chr11	-	62620825	62622960	GGAGTTTGAGGTAAATGGCTTTGCAATAGTTACCATCAATGGCTGCTATATAAAATTTTC	bidirectional
967	ASHGA5P040779	0.0336066	0.0970334	2.0289	ENST00000435113	RP5-998N21.7	GENCODE	670	chr1	+	149400062	149429580	CGCCCCAACAGCTCCCTCTACCAAACTGAGGCTGGGCTGGGAGACTAGGCACTACACCAT	natural antisense
968	ASHGA5P045690	0.00972845	0.0383431	2.02867	NR_034035	SRSF10	RefSeq	2388	chr1	-	24292936	24306953	GTGGGAAAAGGTATGGTCCAATATAAAAGTTCCATTTTTGCCATTATTGGCAAATCTTGC	exon sense-overlapping
969	ASHGA5P050310	0.00622332	0.0272352	2.02847	TCONS_00015390	XLOC_006972	LincRNAs identified by Cabili et al	370	chr8	-	1236703	1237178	AAACTAGTTCCCCTCCTAACAAAACCACATACACACACACACGCTGAACCAAAACTAGTT	intergenic
970	ASHGA5P037520	0.0145336	0.0518736	2.02744	ENST00000441095	AL133493.2	GENCODE	674	chr21	+	47013567	47016923	GAAAAACATGCATCTCGTAACCAATGAAATCGGGCTTGTCCTGAAGACCTCGTGCATTCA	intergenic
971	ASHGA5P036723	1.95572e-05	0.000346771	2.02593	ENST00000454331	RP4-610C12.3	GENCODE	553	chr20	-	29521636	29522987	TATTTATAACTCCCTCTATAACTCTCTGTTTGGAGACACTGTGGCTCTATTGACAGACTG	intergenic
972	ASHGA5P042156	0.0172924	0.0587914	2.0244	ENST00000427974	RP1-56L9.7	GENCODE	741	chr6	-	160060338	160061133	CCTCTTCTTTCCACATTTGAGTATTTGATCAACCTGGTATTTATTTTGGAAGTATGCATC	intergenic
973	ASHGA5P031153	0.0233205	0.0736298	2.02435	ENST00000563124	RP11-305A4.3	GENCODE	2085	chr16	-	49954640	49958065	ACAAACTCTCAACTCTGTCAGAAAATGGGCTGTGTCTGTGCCTCTCTCTCTTTCCTAGAA	intergenic
974	ASHGA5P025649	0.0476973	0.125385	2.01986	NR_024222	KBTBD4	RefSeq	2405	chr11	-	47593748	47600567	GGGAACGCAGCTGGCAGAGAGAGAAGTTGGCTAGCATGGAATCACCAGAGGAGCCTGGAG	exon sense-overlapping
975	ASHGA5P039202	0.00552206	0.024958	2.0154	uc021oqs.1	AK021551	UCSC_knowngene	1533	chr1	+	101548009	101552819	TGAGTAGTGGACTAAGGAAACACCACTCTAACCTTTTTCTCTCTGCGATAATCCCATCTT	intergenic
976	ASHGA5P045978	0.0496268	0.129401	2.01535	ENST00000415141	RP11-203J24.8	GENCODE	546	chr9	+	130702573	130703231	CTTTATTTTCTTTAAATCTCCTAATAAAAACATTAAACTTTCAAGAAGATTCCAAACTGA	natural antisense
977	ASHGA5P056839	0.00154552	0.0093962	2.01532	TCONS_00009372	XLOC_004320	LincRNAs identified by Cabili et al	1145	chr5	+	25083406	25162815	CCCTCCGAAAAATAACTTTCTAAAGCAGACAGAGAGCAAGAGCAAGAGAGAAAGAAAACC	intergenic
978	ASHGA5P027744	0.00862053	0.0348739	2.01523	TCONS_00012771	XLOC_005807	LincRNAs identified by Cabili et al	416	chr6	-	112697489	112717623	AATGATCAAGAACATCCCACACACAACACCGGGCAATGATACATCTTCATGTATTTCCTG	intergenic
979	ASHGA5P053581	0.0191739	0.0634094	2.01467	uc022bce.1	AX747544	UCSC_knowngene	2530	chr8	-	143760854	143763384	CTGAGCGTCAGAAATGGGGTGAGTGAGTAAGTGAGCTCAGGGATGGGGAGGGACAGATGG	natural antisense
980	ASHGA5P031306	0.00185424	0.010798	2.0143	ENST00000432536	GAS5	GENCODE	841	chr1	-	173834996	173836827	CACTCTTTAAAAAAAAGAACCGTGGAACAATGAATTAAAATCTGTACCTGATCTCTTTAG	bidirectional
981	ASHGA5P029786	0.0134343	0.0488507	2.01354	TCONS_00016205	XLOC_007595	LincRNAs identified by Cabili et al	666	chr9	+	136619186	136620083	TGTGCTACATCAAGGTACAAGAAAGAGAATTTCCTTTGCAATCCCTTGGTGGTGGTGGTG	intergenic
982	ASHGA5P041295	0.0331582	0.0960809	2.01199	ENST00000427306	EPB41L4A-AS1	GENCODE	1367	chr5	+	111496225	111497999	CCAGGGAAATAAATACGCATAGTACTGGCATTCTGCATCTCTTTAAGATTTGTTTTTATG	intergenic
983	ASHGA5P050316	0.0143906	0.0515479	2.00711	TCONS_00015389	XLOC_006972	LincRNAs identified by Cabili et al	267	chr8	-	1236493	1237155	GAAACTAGTTCCCCTCCTAACAGAACCACATACACACACACGCTGAACCAAAACTAGTTC	intergenic
984	ASHGA5P012682	0.00371236	0.0183593	2.00403	NR_027878	ADAM9	RefSeq	4005	chr8	+	38854504	38962779	TGGACATGGGAAATGAATACTGCATTGAGGGACGGACTTCTGGTCTTCTTCTTCCTAATT	exon sense-overlapping
985	ASHGA5P049417	0.0247702	0.0770296	2.00336	TCONS_00013540	XLOC_006179	LincRNAs identified by Cabili et al	920	chr7	+	95308462	95311461	ATGCCACCAGCCAACATGGACCATAAATTAAATTTGGAATGGAAGCCACACATGACATGG	intergenic
986	ASHGA5P053210	0.0107789	0.0413246	2.00219	ENST00000411909	AZGP1P1	pseudogene	902	chr7	+	99578384	99585158	ATGATGGAAAGGACTACATTGAATTCAACAAAGAAATCCCAGCCTGAGTCCCCTTGGTCC
987	ASHGA5P050797	0.00149259	0.00918578	2.00068	ENST00000432162	RP11-86H7.1	GENCODE	646	chr1	-	95138452	95197901	GCCTTTGTCCCATGCTTTGAAATTTACCACATGAAAAATAAAATTAAATACTGATCATCA	intergenic

## Sheet: 1773 down-regulated lncRNAs
Table S1. LncRNAs differentially expressed between no dural penetration and serious dural penetration
Number	ProbeName	P-value	FDR	Fold Change	Seqname	GeneSymbol	Source	RNAlength	Chrom	Strand	txStart	txEnd	Sequence	Relationship
1	ASHGA5P035855	1.429e-10	4.1e-08	654.308	ENST00000435357	AC087073.1	GENCODE	604	chr2	+	52600255	52617150	TCTCTGTCTATTATTACCCTATAGAATGACCTTCTTTCTTATATGTGTTCAGGAAGGGCA	intergenic
2	ASHGA5P035854	6e-13	1e-09	285.182	ENST00000440698	AC007682.1	GENCODE	3939	chr2	+	51259738	52635055	TGTACTGAAATTATGACCTGATTGTATATTTCTCCCTAGTCTGCATATAGGGAGGTTATT	bidirectional
3	ASHGA5P057033	4.453e-10	8e-08	69.2964	TCONS_00012100	XLOC_005629	LincRNAs identified by Cabili et al	3458	chr6	-	18744006	18757698	ACAGTGGAAGACCTGTTCCTTCTACCCAAGAAAGAACAGTTAATGAAGCCACATGAGCAT	intergenic
4	ASHGA5P050032	1.51326e-08	8.8e-07	59.1097	ENST00000573860	RP11-849I19.1	GENCODE	423	chr18	-	76738350	76739074	TGCCTTTAATTGTGTAAGTTTGACGAAGTCAGAGCTTTGGGTTCCAGGAAAAGCGCAGGA	intergenic
5	ASHGA5P033681	3.85892e-08	1.825e-06	52.7455	ENST00000575722	RP11-849I19.1	GENCODE	1256	chr18	-	76736554	76738843	CACCACATGACCACTGTCTATTAATATTGTCATACCTAAACACTCGCAAAAACAAAAGTT	intergenic
6	ASHGA5P023166	3.10722e-08	1.532e-06	39.0481	ENST00000572007	RP11-849I19.1	GENCODE	471	chr18	-	76737287	76737883	TTTCTGTTGCGTGTGGACGTGGGGAGGATCTTCTAAGTCCCTCCAACGAAGGCAAGTGTG	intergenic
7	ASHGA5P040420	2.945e-10	6.5e-08	30.4274	uc003jms.1	AK000840	UCSC_knowngene	1916	chr5	-	42155934	42175356	AATGCATACATTGTATCAGAAATTATCTCCCATATTGATGAGTCTTCCATGGGCATCTAA	intergenic
8	ASHGA5P040338	1e-13	1e-09	29.7659	ENST00000502209	RP11-308B16.2	GENCODE	372	chr5	-	12554001	12574749	CCATTTGAAAAATAGAAGATTTAAAGATTGACGCAAAGTGCATGTACCATGATACACCAG	intergenic
9	ASHGA5P027151	3.5296e-09	3.2e-07	29.5095	ENST00000536317	RP11-1060J15.4	GENCODE	1110	chr12	-	27849320	27863703	CAGCTTCCTCGGGTGTAGTTAAGCATATATACATACAGCTAAATAAACATGTTAGTTCTC	natural antisense
10	ASHGA5P050002	9.6622e-09	6.48e-07	29.0631	TCONS_00014003	XLOC_006644	LincRNAs identified by Cabili et al	277	chr7	-	149903392	149917567	ATGAATCAAACCGCAGGAGTCTCCAATAGCGTCAGGTATCCCCCGGGGAAAGGCCACAAG	intergenic
11	ASHGA5P023540	5.63203e-08	2.395e-06	25.8012	ENST00000583511	RP11-849I19.1	GENCODE	393	chr18	-	76737094	76738843	CCTCGCCCCAGTGTGGACGTGGGGAGGATCTTCTAAGTCCCTCCAACGAAGGCAAGTGTG	intergenic
12	ASHGA5P028406	7.821e-10	1.16e-07	25.3997	TCONS_00010552	XLOC_005079	LincRNAs identified by Cabili et al	1822	chr5	-	170171868	170174581	CTGGGGAGATTAACATTATTGAATCTCTACAACATCCTAGAACACCCTAGACAGGAGGTC	intergenic
13	ASHGA5P035556	4.24237e-08	1.969e-06	24.0015	ENST00000417922	LINC00607	GENCODE	558	chr2	-	216608542	216708445	TCATGTTCCATCCAGCAAATGAAGTATCACGAGCACACGCCAGAGGAACCAAATTCTCTA	intergenic
14	ASHGA5P039749	3.70709e-08	1.786e-06	23.5899	ENST00000506276	AF146191.4	GENCODE	703	chr4	-	190701489	190861426	TAGGTAATACAGAAAAGTTATTGCCATTTTTCCTTCATCAGCCATGGCTGGGAGTCAAAA	bidirectional
15	ASHGA5P019840	2.15219e-05	0.00021407	22.9879	ENST00000503938	AC006445.8	GENCODE	366	chr4	-	13547698	13548588	TGTGGCAGGAGTACCCTACAAGGTTTGCACAAAGCAAGAAAGCATCATGTAACCGAAATG	intergenic
16	ASHGA5P035554	1.6642e-09	1.92e-07	22.858	ENST00000423530	LINC00607	GENCODE	2104	chr2	-	216484357	216692126	CAGACTCATAAATCAGAAACCACTAACAAATGTCGTTCCTTTTCTGATCTCTTTCTCTTG	intergenic
17	ASHGA5P038346	9.372e-09	6.35e-07	22.2314	TCONS_00023557	XLOC_011384	LincRNAs identified by Cabili et al	3376	chr15	+	100882801	100892843	AGGCTAGAATTTGTGATCCTGATTTCTGGCTTGGTGCTTCTTATTAACAGCAGGATCCCC	intergenic
18	ASHGA5P027724	1.12205e-08	7.29e-07	22.1697	ENST00000539568	RP11-283I3.2	GENCODE	694	chr12	+	312807	314189	GAGAAAGGCCTTGGAAGGGAAATTAGTGAAAACTTAGGTGGAAATTCTAATATATGCACT	natural antisense
19	ASHGA5P047278	0.000734928	0.00358193	22.0438	TCONS_00014933	XLOC_007004	LincRNAs identified by Cabili et al	788	chr8	-	10436254	10438247	TACTTGTTGTAAGAGAAACTAAAGTCGTCCAGTTCCAGTGGTGCTTCAGAGCCCAACAGA	intergenic
20	ASHGA5P027027	2.6321e-09	2.59e-07	21.3705	ENST00000544461	RP11-90D4.2	GENCODE	3033	chr12	-	8448581	8549399	ATTCCCTCAAAGACTACTCATTTCCAAGAGGGGAGAAAAAGTGGAGTCATGAAAAACAGT	intergenic
21	ASHGA5P051558	6.4499e-08	2.654e-06	21.0708	uc003dhi.3	BC065373	UCSC_knowngene	1738	chr3	+	54354213	54355951	CTTCTTACAGAAATACAAAGAGTATGAGAAAGACGTTGCCATAGAAGAAATTGATGGCCT	exon sense-overlapping
22	ASHGA5P014586	0	0	20.6138	ENST00000411599	RP11-254K3.1	GENCODE	479	chr10	+	121940741	121968507	CAGTGGAAAGAAAACACTTGCTGTAATTGGAAAGCCCCGAGAAGGTTGAGAGCACTTTTG	intergenic
23	ASHGA5P040869	8.18341e-08	3.164e-06	20.329	ENST00000523398	CTB-37A13.1	GENCODE	283	chr5	-	169199969	169206369	CTCACTTGAAGAACTTTGATGCCTCTAAATGCTCTGATGAGAAAAAACTTGTCCTCAAAA	intronic antisense
24	ASHGA5P031564	1.90336e-05	0.000194983	20.2414	ENST00000570153	RP11-317P15.5	GENCODE	1492	chr1	-	182610950	182612442	TCATGTCATTCACCTTTACTATAAACAAGGCTGTGAGAACATAATAAACAGAACCTGAAC	intergenic
25	ASHGA5P027535	1.39039e-08	8.59e-07	20.0543	ENST00000551299	RP11-341G23.4	GENCODE	497	chr12	-	104140092	104160684	ATTCTGTACCCATGGTGTGAAGAGTTAAAACCCATCTAAGGAGACTTTCCAAGACTCTCT	natural antisense
26	ASHGA5P045037	8e-13	1e-09	19.7939	ENST00000519695	CTD-2501M5.1	GENCODE	854	chr8	+	132320791	132329830	CAAAGGAAATTAGGTCTTTCATAGTTCTCATTAAATGCTGGAGGAGTCTGACTACTGCTG	intergenic
27	ASHGA5P026239	8.647e-10	1.19e-07	19.5713	ENST00000496975	AC084117.3	GENCODE	270	chr11	+	18427155	18428278	GCTTTAGGATTAATGTCCATTAGGCCTGTTCAACACATAGATACTTGATAATTTGACTAC	intron sense-overlapping
28	ASHGA5P040170	1.48437e-08	8.75e-07	18.7014	ENST00000507934	RP11-1336O20.2	GENCODE	2209	chr4	+	151500240	151502697	CCTTCAAGCCAAAGTAATTTTGTTACAGTTTGCACCTTCTACTACACAATGTTGATAGAA	intronic antisense
29	ASHGA5P037160	7.7237e-09	5.67e-07	17.8754	ENST00000583223	WI2-87327B8.1	GENCODE	1918	chr20	+	61172796	61174714	CAGACTAGAGCTCCGACACATGAATTATTAATGCCGCATCATATTAATTGTATTGATATG	intergenic
30	ASHGA5P020728	8.654e-10	1.19e-07	17.871	ENST00000519005	CTD-2501M5.1	GENCODE	731	chr8	+	132322718	132329753	ACAAATCATGAAAAGTAATGGAATGCTACAGCCTAGTCAGTTTTGAGAAAAGGCTAACCA	intergenic
31	ASHGA5P045338	3.74582e-07	9.787e-06	17.5856	ENST00000419620	RP11-332M4.1	GENCODE	395	chr9	-	98361826	98368568	CTGCAGTATGGAGCATTGGTTTCTTTCTTGAGTTGTGCTAACAAAATTAAAGATACGAAT	intergenic
32	ASHGA5P017730	2.98313e-06	4.7253e-05	16.7225	NR_037195	LINC00607	RefSeq	3690	chr2	-	216476285	216708259	TCTTTGTGAAAGTTGTTTTAAGGCAGAGTATCATATCGCATCAAAACCGCTCCATAAGTC	intergenic
33	ASHGA5P056564	8.858e-10	1.21e-07	16.5842	TCONS_00006131	XLOC_002733	LincRNAs identified by Cabili et al	1123	chr3	+	97910048	97915894	ACAGTGGAGGACAGCAATGTCAGACCTCTGAACCCAAGCATGCACGTATTCATCCAGATT	intergenic
34	ASHGA5P018881	9.37235e-06	0.000113003	15.8046	ENST00000458684	AC005162.3	GENCODE	483	chr7	+	29040586	29049868	TCTAAGGAGAAGGCTAATTTGGAAGGGAGTCATACTGGTACAAGGAGACTACCAAATCAG	intronic antisense
35	ASHGA5P039585	6.9e-12	4e-09	15.5723	ENST00000506852	RP11-810P8.1	GENCODE	648	chr4	-	127964584	127998917	GAAATCCTTTGACACTGTATCAAAGATCTGGTCATGAAATGCATATTTAGACATTGCAAG	intergenic
36	ASHGA5P019962	7.2867e-09	5.5e-07	15.3515	ENST00000505908	AC008834.1	GENCODE	651	chr5	-	97421963	97496897	GCTGTATCTGAGATCACCATGTTTTCAATTATCTCATATGAACCTGTTTCTGTTCAGAAA	intergenic
37	ASHGA5P015368	4.8378e-07	1.1965e-05	15.2052	ENST00000419668	AC002454.1	GENCODE	527	chr7	+	92484222	92546488	CTACACATCACACTGCAAGCTATTTGGCATATGAAGGTCTTGACCTGAGAAAACCATCTT	intergenic
38	ASHGA5P044540	5.369e-10	8.7e-08	14.7261	ENST00000520785	RP11-737F9.2	GENCODE	474	chr8	-	131904315	131905031	TCCTGGGGCAGAAGCTATGAGACTATTATGAAAATTATTTAAACCGCTTTCCATAGCAGA	intron sense-overlapping
39	ASHGA5P037161	2.8918e-08	1.437e-06	14.3941	ENST00000418953	RP13-30A9.2	GENCODE	461	chr20	+	61265123	61267214	CCTTGGGCCTTCAGCAAATTTTCTCCTTTAAAAATTTCCTTTAATACTGTGTAATGTTGC	intergenic
40	ASHGA5P014808	2.5235e-09	2.52e-07	14.0997	ENST00000413563	LINC00607	GENCODE	570	chr2	-	216488845	216692164	CTCTATGTCAAGATACCTGGGAAGCCGGAGTTGTTTTAAGGCAGAGTATCATATCGCATC	intergenic
41	ASHGA5P056565	1.34134e-07	4.637e-06	13.9979	TCONS_00006132	XLOC_002733	LincRNAs identified by Cabili et al	1126	chr3	+	97910048	97915894	ACAGTGGAGGAAGACAGCAATGTCAGACCTCTGAACCCAAGCATGCACGTATTCATCCAG	intergenic
42	ASHGA5P044569	5.26957e-06	7.2583e-05	13.6862	TCONS_00001172	XLOC_000424	LincRNAs identified by Cabili et al	1203	chr1	+	156481486	156483108	GTTTCGTTCACTTGTTTTACACAGTGGGCTTCCAACTAAACTTTCCTTTGAAGAGCCGGG	intergenic
43	ASHGA5P030311	1.22e-11	6e-09	13.4152	ENST00000559468	RP11-654A16.3	GENCODE	588	chr15	-	99497377	99646030	GAGAATGGATGTGAAGGTCTTTTTAGCAACATTAGAACACTACAAAAATCACACATCTGA	intron sense-overlapping
44	ASHGA5P043594	1.32886e-06	2.6148e-05	13.3954	ENST00000411479	AC005162.5	GENCODE	578	chr7	+	29026643	29028515	GATCAGCTTCCATTTTCCAGGGCAACATCACTCCAAACCTTTTTTGATAGAATCTACTTT	intergenic
45	ASHGA5P053188	7.33314e-07	1.636e-05	13.2896	ENST00000435695	AC002454.1	GENCODE	432	chr7	+	92465796	92546501	TGAAAGCTGCCACACCGTGAAAACAAGGCCTCCTTCACATTAAAGGCAAATTGCGACTTT	natural antisense
46	ASHGA5P016725	2.5907e-07	7.512e-06	13.2101	ENST00000433505	RP11-426L16.8	GENCODE	767	chr1	-	113362791	113392437	GCGCTTAATGCAACGCGAATGAAATTTGGTGCCATCACTCGGATCAGGGGACCTCCCTTG	intergenic
47	ASHGA5P050561	1.43051e-08	8.75e-07	12.9926	TCONS_00002182	XLOC_000424	LincRNAs identified by Cabili et al	213	chr1	+	156481505	156481844	CATCCTCTACAGAAGGAGGAAGAGGTAAGCAAGAACAAATTCAAGAGGGTGCAAATCTGC	intergenic
48	ASHGA5P054582	5e-13	1e-09	12.9894	TCONS_00011084	XLOC_005079	LincRNAs identified by Cabili et al	1651	chr5	-	170171931	170174359	CATCCCCCAGGGGAAGATTCCAGAGCAGACAACTCAGCTGCCTTTGTGACTGAAACCGAG	intergenic
49	ASHGA5P022310	1.29271e-07	4.525e-06	12.9409	ENST00000554254	RP11-618G20.2	GENCODE	533	chr14	-	62182275	62217815	ATCCACTACAGTACAGGTCAAGTGAAGTTCTTCTGCTGATATGTTCTGCTACTGCATAAG	intronic antisense
50	ASHGA5P018813	1.48619e-05	0.000161103	12.8605	ENST00000457891	AC005162.3	GENCODE	246	chr7	+	29040658	29049815	ACCAAATCAGTATAGAAAGATGCATACCCTCAAGAGAATCTGCTTGTTGTGGTTTCTGAT	intronic antisense
51	ASHGA5P056953	2.332e-10	5.5e-08	12.7888	TCONS_00011083	XLOC_005079	LincRNAs identified by Cabili et al	1208	chr5	-	170171931	170173500	AAGTGCGGAGGGGAAGATTCCAGAGCAGACAACTCAGCTGCCTTTGTGACTGAAACCGAG	intergenic
52	ASHGA5P033387	2.45977e-07	7.266e-06	12.7229	TCONS_00028090	XLOC_013434	LincRNAs identified by Cabili et al	1490	chr20	+	1810674	1816693	CATAGTAGGTTCTGTTGTCTATGCCAGCAAGGTCACTATGGAAGGTACAGTTGTCACTAC	intergenic
53	ASHGA5P055707	3.38889e-08	1.645e-06	12.693	ENST00000542000	RP11-143E21.7	GENCODE	694	chr12	-	130639816	130646689	AGATCGTTTTGCTATCCCTGAATGCCTGTCACCCTTGTTTCGTAAGGTAAGATTGGGAAG	bidirectional
54	ASHGA5P035555	1.24e-11	6e-09	12.5943	ENST00000419922	LINC00607	GENCODE	526	chr2	-	216484830	216486076	TTCTTTAGCTTTAGCACGTGTTTCCACCAGTGTCCCTTAACGGAGAGGATGACTATGTCA	intergenic
55	ASHGA5P043540	5.28555e-06	7.2705e-05	12.5625	ENST00000412563	AC007091.1	GENCODE	566	chr7	+	19393156	19618229	GAGAAGAAATCATAAACATTGAGAGTTGCCATGCATAATGATGACCTTCAACACATATGA	intergenic
56	ASHGA5P054603	0.000625574	0.00314699	12.3411	ENST00000451610	RP11-354M20.3	GENCODE	442	chr10	+	119776997	119804868	ACTGACCCTGAAAAATGGCTGAGCTAAAATAAAAGCTGTGTTTATAACGCTGAAACGAAA	natural antisense
57	ASHGA5P027730	2.41756e-06	4.0204e-05	12.2195	uc001qjg.1	AX746535	UCSC_knowngene	1149	chr12	+	1615335	1616484	GCGAAGTTTTGGGTACAGACTGTGGTCATGTTTCCACAACATCGTGAATGAGTTTAGTGC	intergenic
58	ASHGA5P035953	1.67884e-06	3.0479e-05	12.0957	ENST00000453951	AC104135.4	GENCODE	1266	chr2	+	75167384	75169797	GAGTTCTCTCACCGCTGAATATCTCCTAAGGCATTAGTAAAACACTATTTAAATATTTCC	intergenic
59	ASHGA5P057340	8.76e-09	6.13e-07	12.095	TCONS_00016145	XLOC_007542	LincRNAs identified by Cabili et al	224	chr9	+	121713410	121738745	TAAAACTCAGGATGTGATAGGTTATATTGGGCAACAATGACAACAATTCAGTGGGCTAAA	intergenic
60	ASHGA5P021221	1.56215e-08	9e-07	12.013	ENST00000527970	RP13-726E6.2	GENCODE	983	chr11	-	3502749	3602441	CGGCAGAGGAATCCTTCTTAGAAATTCCTAAGGCTCAATGCTGTGTGGAAGATTCTGAGA	intergenic
61	ASHGA5P033847	4.84134e-08	2.138e-06	11.6715	uc002lcx.3	BC040860	UCSC_knowngene	673	chr18	+	44812094	45120918	AGCCCGCAGTAATTCAATCTAACCTTGTACTTACAGAAAACAATGAGATAATGAACAGAA	intergenic
62	ASHGA5P053639	8.31524e-05	0.000625225	11.6484	ENST00000430766	RP11-75C9.1	GENCODE	1959	chr9	+	8858133	8861724	GTTTTTACAGGTAAAGAAACGAAGACCCTGAGAATTTAAAATCATCCAACTATTTGGTGC	intronic antisense
63	ASHGA5P049097	9.84028e-08	3.678e-06	11.5281	TCONS_00023857	XLOC_011172	LincRNAs identified by Cabili et al	300	chr15	+	24415180	24426091	GAGATACAGCTGACCTTGACCACATTTCTTACTTCCAAGAAGATTGTAGCAATAATTCAG	intergenic
64	ASHGA5P053805	3.4894e-09	3.2e-07	11.5117	ENST00000451100	RP11-45A16.4	GENCODE	728	chr9	-	119050896	119080968	TTGCTCTTGGGTAAGTTTTCTTTTTCTTATGTAATGAATGGGTTACTCTTCAGCCCTTAG	intronic antisense
65	ASHGA5P032182	6.2637e-09	4.96e-07	11.3771	ENST00000440522	AC003664.1	GENCODE	485	chr17	-	13202500	13210077	CTCCAAAATATAGCATCTTTCTACTCATCTTACTAAAGCTCAAAGAAGGTGATCTACAAG	intergenic
66	ASHGA5P028242	6.24e-11	2.2e-08	11.1055	ENST00000549448	RP11-650K20.2	GENCODE	413	chr12	+	104213387	104215863	GTCTATGCATAAACACCAATCAGCTATGTGAAAAGAATGTCAAGTAAGACTTTCCTTCAA	intronic antisense
67	ASHGA5P016939	1.60245e-05	0.00017064	11.1029	ENST00000435885	RP11-214F16.3	GENCODE	335	chr13	-	100143536	100144751	CCACAAACGAATTCATTACTCCTCCTTTGATTTGTCAATTTGAGAAACAACTCTTCCAAC	intergenic
68	ASHGA5P040407	1.36335e-06	2.6579e-05	11.0756	ENST00000510469	CTD-2263F21.1	GENCODE	456	chr5	-	38461028	38468409	GCTGTGAATATTGAGACAAAGTATGAAAAGTACCTGGCAACTGGAGATGTTTAATAAACT	intronic antisense
69	ASHGA5P019850	1.06137e-05	0.000123166	10.8345	ENST00000504107	CTC-504A5.1	GENCODE	617	chr5	+	116790958	116815063	TGCAAGAAGGTCGGACTCGGCAGTTAATACTCTTGGATAATGTATTTAAGGATGCTTAAG	intergenic
70	ASHGA5P043593	7.81359e-05	0.000595393	10.8215	ENST00000436594	AC005013.5	GENCODE	588	chr7	+	28997282	28998961	CTGCTCGTGTGCACATACATAATAACCTTCACAGATCCTAAGGTAAACGTTCCTTGCAGG	natural antisense
71	ASHGA5P026600	4.36532e-07	1.0954e-05	10.8091	ENST00000524615	CTD-2313N18.2	GENCODE	125	chr11	+	71433327	71442565	CTTTGTTTAAAGGCAACAGAGAATTGTGGCCTGGCTCAGATCTCCAGCAAGCCTCCAGAA	intergenic
72	ASHGA5P022920	0.0111463	0.0317692	10.7928	ENST00000565545	RP11-114H24.1	GENCODE	657	chr15	+	78194002	78196703	ACCTCAAGCACCTTCTCCTGGAGAATGGTGGAAGAGCAGCTGATCCACGTACGTGCACGA	intergenic
73	ASHGA5P050595	2.1616e-09	2.26e-07	10.7863	ENST00000429464	AC013402.2	GENCODE	2128	chr2	+	105050819	105124289	CAGCATGGAGGTAATGAACTTTAATCAGAAACTTATTGTGCATTGACTGAGCATTTATTC	intergenic
74	ASHGA5P019440	0.000121817	0.000845379	10.7207	uc003dwf.4	LOC100302640	UCSC_knowngene	2724	chr3	-	106555657	106959485	CATGTGGCAGGTTTTTCTCACCGCATAAAATATGTTATAGAGTAGTCCATCTATTTCTCT	intergenic
75	ASHGA5P041894	1.0081e-05	0.000119327	10.6138	ENST00000564032	RP11-284F21.8	GENCODE	1828	chr1	+	156479645	156481473	CACTATTTTCATCATCAGACAATAGCCCATAATACTTTGTCTGACATCTGACAAAGAACG	intergenic
76	ASHGA5P036426	2.00937e-05	0.000203376	10.5184	ENST00000415479	AC093850.2	GENCODE	648	chr2	+	216582765	216584147	CTATCGCACATTACCTAAGAAAGATGGGAATTGACATGCACATCACAATTGTATACACAA	intergenic
77	ASHGA5P053640	5.24978e-08	2.286e-06	10.4134	ENST00000447950	RP11-75C9.1	GENCODE	1668	chr9	+	8858129	8862255	GTTGCTAATCATGTTTTCTTTGTGAGGACTACTGGGGTTTTTATTAAATCCAGCTAAATG	intronic antisense
78	ASHGA5P015315	4.635e-10	8e-08	10.3805	ENST00000419211	AC015987.1	GENCODE	804	chr7	+	135611202	135617629	GACTGACACAAAAGCAAATCCTTTCAAAGACTGATTTTGAATCCTGATTGAAGAGATCAA	intronic antisense
79	ASHGA5P025992	5.0895e-09	4.21e-07	10.377	NR_048571	GPM6A	RefSeq	2865	chr4	-	176554087	176923842	ACACAAAAAGTTCATTATGCTGACATATCTTTTCATGTTGGCCTGGCTGGGAGTCACGGC	exon sense-overlapping
80	ASHGA5P031217	2.40719e-06	4.0117e-05	10.2645	ENST00000563754	RP11-95H3.1	GENCODE	750	chr16	-	65175658	65210476	AAGACATCTTTTCTGGAGAGTCACCCAAGCAGTGGATTTGTGAATAAATAAATCTTGTGT	intergenic
81	ASHGA5P028010	8.70178e-05	0.000647498	10.2297	NR_027358	LINC00592	RefSeq	1075	chr12	+	52604713	52617597	CCCCTTATACAAAACTTGGAGCTCAGACCACAAACAACAACAACAATCCAAAAAATAAAA	bidirectional
82	ASHGA5P042785	2e-13	1e-09	10.166	TCONS_00014860	XLOC_006928	LincRNAs identified by Cabili et al	312	chr8	+	132065958	132101711	TGCCTGAGAGTCTAATGGATTACTCAAGTCTGTGCTGCCAAGGAAGAACAGAATCTTTAG	intergenic
83	ASHGA5P057931	6.06769e-06	8.0177e-05	10.0594	TCONS_00023869	XLOC_011178	LincRNAs identified by Cabili et al	340	chr15	+	24630695	24638802	AAGACAGAAACATCTCAGCAGACCGTGATCATGGGCTACATTCTCCATACCAGCTTCATA	intergenic
84	ASHGA5P050539	1.88e-11	9e-09	10.0286	ENST00000377469	AC104135.3	GENCODE	3662	chr2	+	75155365	75160151	CTCACAATAGGAAATAAAACTTTAACCAAAAGAGCATGGGCAGATATTTCCCGGATCTGA	intergenic
85	ASHGA5P053903	3.27748e-07	8.912e-06	9.94927	ENST00000414513	CD99P1	GENCODE	3071	chrX	+	2534659	2556735	ATGAAACAGATACAGAGTATTGGTGTCAACCTAAGTATTGGTGTCAACAAAGAGATGGTT	intergenic
86	ASHGA5P040468	0.000826816	0.00391533	9.90457	uc003juq.3	BC028670	UCSC_knowngene	1650	chr5	-	65500950	65505274	CAATTAATGACAGCCTGTAGAGTTCTGTATTCATAGAAGCAGTAGGGGTACATGCTGCAG	intergenic
87	ASHGA5P028967	5.28994e-06	7.2705e-05	9.88913	FN061179		LincRNAs identified by Khalil et al	87	chr10	-	9089050	9089134	CAACATCTGTAATTTTGACATATATAATATTTTAGCAGTGGGTATTTATTTCTAGATAAA	intergenic
88	ASHGA5P032714	9e-13	1e-09	9.8782	ENST00000416510	RP11-400N13.1	GENCODE	675	chr1	-	222262510	222560776	TCTTGAAGGGAAACCTCAATGTAGCTTAGCTCTTGAGAAAACAGTATGTGCATATGCTTC	intergenic
89	ASHGA5P048580	5.82493e-06	7.7698e-05	9.85562	NR_026646	PWRN1	RefSeq	1451	chr15	+	24803303	24832926	GAATTGGATTTGGAAAGCAACTTCGAATAGTCTCTGCTTATATTTCTGAGATTAAGGCAA	intergenic
90	ASHGA5P020541	2.14336e-05	0.000213528	9.84885	ENST00000515519	CTC-529P8.1	GENCODE	756	chr5	+	148442879	148451090	ATCTTGCAAAGGAGATGGAGAAAATATGGCTGAATGCCAGCAAGAGCAAAGTGGTGAAAG	bidirectional
91	ASHGA5P043592	0.00113208	0.00503713	9.84054	ENST00000425873	AC005013.5	GENCODE	571	chr7	+	28995865	28998864	AGGTTGCACAGAATGAACTTGTTGAAGTCGCATGGGTCGGACACCAGCGGCGGCAGCCCG	natural antisense
92	ASHGA5P044271	7.52e-11	2.5e-08	9.82688	TCONS_00001315	XLOC_000595	LincRNAs identified by Cabili et al	2037	chr1	+	227976987	227979782	TAAAAAACCATTGAATTTATTGGACAAAACACAATATGTTGTAGCTGAGACCACACGGCC	intergenic
93	ASHGA5P045768	3.1325e-09	2.96e-07	9.7978	ENST00000427901	RP11-63P12.7	GENCODE	361	chr9	+	74872251	74872699	CCCAGATCAGCCTCTGCTGACAGTTCTCTTGTAAAGATACTGAGGATAGGATTACAGGTA	intergenic
94	ASHGA5P057884	8.14871e-06	0.000101038	9.79642	TCONS_00023303	XLOC_011172	LincRNAs identified by Cabili et al	268	chr15	+	24415174	24423086	ACAGAAATATCTCAGCAGACCGTGATCATGGGCTACATTCTCCATACCAGCTTCATAGCT	intergenic
95	ASHGA5P027536	1.19791e-07	4.3e-06	9.74745	ENST00000550029	RP11-341G23.4	GENCODE	738	chr12	-	104157089	104162636	GCCTCTGGGAGCTTTTCCTTTTTTAACAGTACTTTGTTGAGAGATGATTCACATATAATA	natural antisense
96	ASHGA5P016952	5.8303e-09	4.65e-07	9.71197	ENST00000435984	AC104135.3	GENCODE	565	chr2	+	75145274	75159921	AGGCAGAATGGAAATAAAACTTTAACCAAAAGAGCATGGGCAGATATTTCCCGGATCTGA	intergenic
97	ASHGA5P018879	1.082e-06	2.2186e-05	9.68247	uc010kwz.1	DPY19L2P1	UCSC_knowngene	3366	chr7	-	35119600	35201706	GAAACAAGGAGGAATGAGTAAAATACTGTTCGTGATATTTCGTGTGTTTTAGCTACAAAC	intergenic
98	ASHGA5P033246	3.25405e-06	5.0568e-05	9.58584	ENST00000572877	RP5-1107A17.4	GENCODE	2356	chr17	+	55060109	55062465	TTGATCAAACTGCTTCTAAGTCTGGGTCCCTTATCAATCCACAGGGACTCTGAAGAGTCT	intron sense-overlapping
99	ASHGA5P016019	2.78836e-07	7.94e-06	9.56009	ENST00000425894	AC027119.1	GENCODE	467	chr3	+	6004528	6165807	GGTGGAGAAGGAGATTTAGAGGAAGAGTGATAAATCAGAAGTCTTCGTCCAAGAATTAGC	intergenic
100	ASHGA5P038214	1.145e-10	3.5e-08	9.44201	ENST00000515154	PRSS44	pseudogene	1146	chr3	-	46850848	46854048	CTACAAGAAATGGATTATTGATCACCTGAGACAAGCTTCCTGTTTGAATTCAAAGACTTC
101	ASHGA5P039648	1.0086e-05	0.000119327	9.28749	ENST00000504755	RP11-342A1.1	GENCODE	476	chr4	-	150068953	150070932	GCAGTAAATGCTTAATGGGTTTTTCTTCAATGCCACAAAGTCAGTAGCTATAAATCTTGA	intergenic
102	ASHGA5P034586	1.60433e-06	2.9593e-05	9.2744	ENST00000445300	RP11-431K24.1	GENCODE	2044	chr1	+	8086797	8182762	ACTGTTTTCCTGAAAACATTGCTTCTTTCTCTCATCTCAAAGAAATGCCACAAGTCGTGT	bidirectional
103	ASHGA5P039210	1.6134e-09	1.88e-07	9.23977	ENST00000424955	RP11-347K2.1	GENCODE	418	chr1	+	103817768	103828355	GAGGTCTCCAACTCATTTGATCTGAATTTCTGTCAGAAATAATGGTTTTCATTATGACTC	intergenic
104	ASHGA5P032003	8.3177e-09	5.99e-07	9.22622	ENST00000565008	LINC00304	GENCODE	1864	chr16	+	89228789	89230653	GGCTTGTCCAGTTTCAGTTTTGTTTGTTTACTAGGCTTTGTTTTACAGTCACTAGTTAAA	intergenic
105	ASHGA5P018265	0.000558155	0.0028647	9.1436	ENST00000451392	LINC00607	GENCODE	581	chr2	-	216506490	216696313	GAAAAAGAAGGTCTGCCCATCCACATCATTTTGGCTGAATGCGTGACCTATCCAATCCTT	intergenic
106	ASHGA5P054676	3.269e-10	7e-08	9.08342	ENST00000526533	RP13-726E6.2	GENCODE	578	chr11	-	3529209	3593217	AAGAGTCTTATCTGGATTAGATCCTGGGAATTGAGAAGCTTCAGCAGGTGGGAAATGCAC	intergenic
107	ASHGA5P029841	3.67732e-07	9.712e-06	9.03203	uc001yrr.3	BC033241	UCSC_knowngene	2014	chr14	+	105998191	106000654	GACCCTTCATCTTCCTTTCAGAACACACTCACATTTTCTATAGGAAAACAGCCTCATAAT	intergenic
108	ASHGA5P018257	1.06966e-05	0.000123901	8.96718	ENST00000451264	AC004540.4	GENCODE	508	chr7	-	26411951	26416321	GGCCCGCGCGGATTCCTGCGGAGCTGTATTTACTTTACATCCATGTGAACTGCTGTCATC	natural antisense
109	ASHGA5P020388	3.46446e-07	9.281e-06	8.95347	ENST00000512647	RP11-331K21.1	GENCODE	424	chr5	-	148554070	148656325	CTTATTAATGAATAAAGAAAAAGATGGCTGAATTGGTCCAGCGGTTTCACTTAACAGATG	intronic antisense
110	ASHGA5P020529	4.04819e-07	1.0363e-05	8.8217	ENST00000515304	CTC-529P8.1	GENCODE	293	chr5	+	148443048	148443737	CATTTTACAGGCAGTGGAGCAGGGGAATCCAGTTGACACTGTGGCTAAATTTCAGAAAAC	bidirectional
111	ASHGA5P053019	5.47898e-06	7.3783e-05	8.81199	NR_038965	LOC100506497	RefSeq	3721	chr7	+	29019582	29052985	AAATAAATACCCACATCTCCATGCTGGACAGCAGAAGAGCAATAAGTTGCCAAATTTTTT	intronic antisense
112	ASHGA5P056830	3.35656e-05	0.000302305	8.69967	TCONS_00009137	XLOC_004120	LincRNAs identified by Cabili et al	220	chr4	-	150070758	150071420	CTAAGCTGAGTACAGTGTTGAGAAGAAGCAATCATGGTAACAGCAGCTTAAACGAAGTGG	intergenic
113	ASHGA5P056495	6.22892e-07	1.4624e-05	8.6317	TCONS_00004869	XLOC_001616	LincRNAs identified by Cabili et al	228	chr2	+	107318305	107384278	AAGTTGGAGTGGGCCAGGATTCCCCCAGTTGGACTCTCACATACCTGTGGACCTCAAGTG	intergenic
114	ASHGA5P027884	7.1e-12	4e-09	8.57604	ENST00000540733	RP11-778H2.1	GENCODE	401	chr12	+	24376204	24380442	CTGAAATATCACTAATGGTGAGAGGAAAGCTCAGAGGTTCTATTAAAGAATGTGAAATAG	intronic antisense
115	ASHGA5P058226	1.239e-10	3.7e-08	8.52346	TCONS_00028323	XLOC_013664	LincRNAs identified by Cabili et al	481	chr20	-	17206103	17206710	TAGATAAGAGCTTGAAGTCCAAATCTACACAAGTCAGAACCTATGCAAGAAAAGCACCAT	intergenic
116	ASHGA5P043634	3.6583e-07	9.698e-06	8.46708	ENST00000440213	AC005022.1	GENCODE	1220	chr7	+	41141201	41173105	GAAGGCAGCTATAGAATCATCATCATATGGAATTCTAGATACAGGCCTACAAAAATGTTT	intergenic
117	ASHGA5P038978	3.134e-07	8.671e-06	8.40905	ENST00000512435	RP11-71E19.1	GENCODE	447	chr3	+	125985659	126007260	CGTGGGTTTGAATTTACACATGCGCACATAATGGGTATGAATAAACCTTTCTTCAAAAAA	intergenic
118	ASHGA5P015167	5.67664e-05	0.000458765	8.40342	ENST00000417479	RP3-428L16.1	GENCODE	573	chr6	+	161352111	161390803	CAAGGCAACATAAACATCTGCAAGAAGAACATTGTGTGAGAAATATCAAGTGAGAGTGGA	intergenic
119	ASHGA5P023461	0.00794384	0.0242975	8.32771	ENST00000581442	RP11-838N2.4	GENCODE	450	chr18	+	3466247	3478925	TGTGTATGCAGGGTATGCACAGATGTGGAAACAGGAACTGATGTGTCCATTACACCACTA	intergenic
120	ASHGA5P056794	1.01064e-06	2.1084e-05	8.29839	TCONS_00008717	XLOC_004231	LincRNAs identified by Cabili et al	1075	chr4	-	190598434	190600102	GTTTTCTTTGAAGACAGAATCAGAGAGGCTCAGCAAATGCCAGAACTCAAATTCAAGCGC	intergenic
121	ASHGA5P028348	2.857e-10	6.5e-08	8.29733	TCONS_00017138	XLOC_007927	LincRNAs identified by Cabili et al	1097	chrX	+	9929483	9936419	GTACATTAACTTCTCACATTTCCCTCTTAAACTTTTGCTACAAACAATCATAGGCCAGGC	exon sense-overlapping
122	ASHGA5P030356	4.578e-10	8e-08	8.28218	ENST00000566797	RP11-580I1.3	GENCODE	849	chr15	+	24686273	24693114	TCTATCTTCCTTCTCCATGGGATCTTTGAGCCATAATTTATAAAATCACCTCTACATCTC	intergenic
123	ASHGA5P056986	3.71989e-08	1.786e-06	8.27553	TCONS_00011810	XLOC_005283	LincRNAs identified by Cabili et al	304	chr6	+	39916123	39920971	ACAATGTCCTTTCTATGCACCTTGGGAGAAGAAAGAGAATCACTGCTCCATGCAACTATT	intergenic
124	ASHGA5P020931	3.83241e-07	9.952e-06	8.26917	ENST00000522197	HAS2-AS1	GENCODE	575	chr8	+	122652141	122654957	CCAGGACTGGGATCTTCTGAGGGGTGGACTTCTTTGGAACTCGACAGGACCTTGAAGACT	natural antisense
125	ASHGA5P039402	0.0231822	0.0572194	8.26419	ENST00000568817	RP11-320H14.1	GENCODE	668	chr4	-	46245564	46246232	TTGGGAAAGGCCACTAGTTGATCATATGACCTTTATTGAATATGTCATGCTTGCTGTTTA	intergenic
126	ASHGA5P046423	6.72504e-07	1.541e-05	8.23144	ENST00000431582	CD99P1	GENCODE	602	chrX	+	2527388	2534212	CATTGAATAAGAGCTTTTAGATGTAGACTTGATATGAGGAAAAGAATCTGTGTGTTTCCC	intergenic
127	ASHGA5P039857	1.76531e-07	5.748e-06	8.11432	ENST00000569621	RP11-496D24.2	GENCODE	2195	chr4	+	24661478	24673191	GAGAAATCCTCGGTCCATTTCAAGTTTGGGGGAAAACTTATTTTTATCATATTTGAGATG	intergenic
128	ASHGA5P056697	2.36392e-07	7.113e-06	8.10177	TCONS_00007914	XLOC_004186	LincRNAs identified by Cabili et al	701	chr4	-	180087669	180091246	CCCCTAGACCATCACGGACGCCAAGCTTCAGGTAACTCTCACAGTGGAAGAAGGCAGGAA	intergenic
129	ASHGA5P041087	1.9169e-07	6.058e-06	8.09897	uc003jox.1	AK097288	UCSC_knowngene	3851	chr5	+	52251186	52255037	GGTGCATCAGCTGTGTATTTTACGTCAAGGTAAATGAGCATCCTGTTTTATATGTTAAAT	exon sense-overlapping
130	ASHGA5P051636	0.000373444	0.00205662	8.09706	ENST00000449151	PDZK1P1	pseudogene	1350	chr1	-	145924826	145940113	AAACTCTGCAGGCTGGCTAAAGGTGAAAATGGCTATGGCTTTCACTTAAATGCGATTCGG
131	ASHGA5P019744	0.00093825	0.00433222	8.05426	ENST00000502345	RP11-526A4.1	GENCODE	561	chr4	-	150654492	150736966	AGTGACTAATGTCCTACATTAGAGATCACCAAGCAAGACTTTTTTCAAGAAGCAAAAACT	intergenic
132	ASHGA5P054125	3.65493e-06	5.5335e-05	8.00797	ENST00000440570	AC004383.4	GENCODE	760	chrX	-	133677366	133680662	CATTGAATGACTGTATGCTGCTTTTGATTTCCGTTAATATGGGCAACTGTCCAATTAAAA	intergenic
133	ASHGA5P046301	2.28915e-06	3.8729e-05	7.97619	ENST00000454625	GS1-421I3.2	GENCODE	772	chrX	-	119144674	119149501	ATGAAGAAATCTAGGTTGTTGGTGTTTTTCTTTGAACACCTCTTCTTGCTCTTCGATAGG	intergenic
134	ASHGA5P036033	7.75952e-08	3.073e-06	7.92471	NR_015399	LOC150568	RefSeq	1524	chr2	+	105050804	105129215	TTACATTATGCTAGAAAAAAGGAGCCGTCACTCTACGTGACATTTCTGTATATTGGTTTA	intergenic
135	ASHGA5P039649	5.44866e-06	7.3563e-05	7.90711	uc003ill.3	BC031092	UCSC_knowngene	2137	chr4	-	150351084	150736980	ATTTGTGTTTGTTGTTTAGAGTCTATTTGCACTTTGTTAAAATAAACAAATTAAAAGGAA	intergenic
136	ASHGA5P033421	7.02808e-07	1.6018e-05	7.86075	TCONS_00028112	XLOC_013466	LincRNAs identified by Cabili et al	1402	chr20	+	16555755	16559931	ACCTCTACGCAAACTGTGAGAGCTTAAAATAACTGATAGTGAAAAACAGTTACAGAAGCT	intergenic
137	ASHGA5P015153	1.57149e-06	2.9301e-05	7.78645	ENST00000417355	AC114803.3	GENCODE	311	chr2	+	220163723	220168852	GAGGACAAAGGGACCACTGCAGTGCTGGGTACAGAGAGGACACCAGAGCATCTGAGACAA	natural antisense
138	ASHGA5P045393	7.908e-10	1.16e-07	7.76981	ENST00000449258	RP11-406O23.2	GENCODE	478	chr9	-	112522639	112534323	GACACAAAATGCTGGAGACGTTGGACGTGCTCTATAGAAAATAATTTCTAAACAATAAAG	intronic antisense
139	ASHGA5P020534	1.59658e-06	2.9535e-05	7.7513	ENST00000515403	RP11-844P9.2	GENCODE	3632	chr5	-	175570087	175612158	CGTTGAAAAAAGACAAAATGAATCTCACACAGAATGTGGTCTATGGAAATGAAGAGGGCA	intergenic
140	ASHGA5P022770	2.92403e-06	4.6491e-05	7.74706	ENST00000562501	PWRN1	GENCODE	642	chr15	+	24815172	24832920	AACCTTTTCGGAAGACATGACTTCCAGATGATATAAGGCTCCATCAGGAACTGTGCAGGA	intergenic
141	ASHGA5P043544	4.963e-10	8.3e-08	7.72402	ENST00000453564	AC099342.1	GENCODE	376	chr7	+	20337916	20340248	GCCAACACTATAGCTGCAAGCACTTACTTCATTTAAGAAGTTTATCGAGAGCTTTATAAA	intergenic
142	ASHGA5P014189	4.67465e-05	0.000391263	7.59247	ENST00000580853	KIR3DP1	pseudogene	628	chr19	+	55297806	55301770	GTGATTACAGGTCTATGTGGGAAACCTTCTCTCTCAGCCCAGCCGCGCCCCATGGTTAAG
143	ASHGA5P036878	1.0964e-07	4.039e-06	7.59098	uc002ycz.2	C20orf166-AS1	UCSC_knowngene	2622	chr20	-	61141753	61148768	GGGAGGGTTTCTTGGGTTTCTTGAAGCCAGTATTTCCCATAGTATCTTACGTCCCAGCAG	intronic antisense
144	ASHGA5P038462	6e-12	4e-09	7.58968	ENST00000507698	RP11-438D8.2	GENCODE	422	chr3	-	140986194	141085979	AATGAAGAGATGGCGATATGACAGAACTCTTAGGTTAACAATGTAAACCTTCACTTTCAA	intronic antisense
145	ASHGA5P020892	1.89965e-08	1.06e-06	7.57005	ENST00000523682	RP11-267L5.1	GENCODE	836	chr8	+	115294297	115308042	GCCCCCTAGACCATCACGGACGCCGAGCTTCAGGAAACGACGAGGCTGAATCCTGTTGGA	intergenic
146	ASHGA5P015898	3.06948e-07	8.53e-06	7.56236	ENST00000424523	AC002454.1	GENCODE	406	chr7	+	92484222	92546465	CCACAGCACACACTGCAAGCTATTTGGCATATGAAGGTCTTGACCTGAGAAAACCATCTT	intergenic
147	ASHGA5P021050	2.3e-12	2e-09	7.54048	ENST00000524014	RP11-38H17.1	GENCODE	246	chr8	+	78362932	78388617	TTCTAATACTAATCACCTATTTTACCGTCTTTTACAACTTCGTTGTAGGAGGTGTGAAAG	intergenic
148	ASHGA5P049098	3.324e-10	7e-08	7.50055	TCONS_00023858	XLOC_011173	LincRNAs identified by Cabili et al	824	chr15	+	24430728	24445459	AATTTACTTTGCTTCATTCTACAGGCTCCATCAGGAACTGTTCAGGACCATGCACTCTGT	intergenic
149	ASHGA5P052380	2.8331e-06	4.5387e-05	7.49857	ENST00000520192	RP11-93O7.5	GENCODE	262	chr5	-	123641922	123721948	AGAAACAGGATTTGGAACTCTCAGAACAAGGCCATTGGGGGTGGAGATTTCTTACCTATG	intergenic
150	ASHGA5P046341	2.89207e-05	0.000268289	7.48684	ENST00000457876	AC004383.4	GENCODE	646	chrX	-	133678455	133679768	AAAGTCCTGGGCACTGTTGCTCATGAGTGCTGCACAACTGTCGCCCTCTAAAGCCACCTC	intergenic
151	ASHGA5P019827	0.000285612	0.00166098	7.48217	ENST00000503666	RP11-529H2.1	GENCODE	257	chr4	-	88183082	88187974	GATTTTAGAGGATTAAACTGCTTCGGCATCTAGTAAACTCCTCCCAGAAGGAAAACTAGA	intergenic
152	ASHGA5P040349	0.000132928	0.000907579	7.46719	ENST00000538380	AC091878.1	GENCODE	2381	chr5	-	17169364	17217508	AAGGCTGGTGTTAAGATCCCTGAGTCCACGTCATATCATAATGCATGATTATTTTATTGA	bidirectional
153	ASHGA5P053000	1.87501e-05	0.000192858	7.45253	ENST00000451368	AC004540.4	GENCODE	611	chr7	-	26411763	26415892	AGTTGGGTATTTTTTTAGCTAGATAATTTAAACGCGAATAATTCAAGTCTGACTAAATGA	natural antisense
154	ASHGA5P034948	5.6772e-06	7.6048e-05	7.39296	uc002rlw.3	BC048132	UCSC_knowngene	1068	chr2	-	28206825	28207893	GGCTGCATTTTCAAGTTCACAAAGGAACACTGCTAGTAATAAATATTTCCAAACTGGTAA	intronic antisense
155	ASHGA5P022554	0.000311235	0.00177897	7.38726	ENST00000558731	RP13-262C2.2	pseudogene	3730	chr15	-	84956504	84962703	AGAAGAGACCAGCTGGAGGGGAGGACCTGGTGAACTTCACTCAGGGAGAGGTAAGGGCCC
156	ASHGA5P030375	0.000159997	0.00105543	7.35797	TCONS_00008683	XLOC_004199	LincRNAs identified by Cabili et al	211	chr4	-	184386041	184393909	GAAAGGTCAACATGGGTGTTTGGAAGAGGTAATGCTAATGAGGTATTCGTAAAATTGGAG	intergenic
157	ASHGA5P021270	6.05441e-05	0.000483742	7.33361	ENST00000529093	CTD-2313N18.2	GENCODE	317	chr11	+	71422785	71433273	AATTGAGAAGCTTCAGCAGGGCTTCCGCTGGGACTAGGATCAGGATGTGGACACCCCCAA	intergenic
158	ASHGA5P056695	8.7211e-09	6.13e-07	7.30676	TCONS_00007884	XLOC_004128	LincRNAs identified by Cabili et al	571	chr4	-	153662549	153667773	CCCCTGGACCATCACGGACACCGAGCTTCAGGTAACTCTCACAGTGGAGGAAGGCAGGAA	intergenic
159	ASHGA5P041015	1.50872e-05	0.000162988	7.28742	ENST00000511596	RP11-454P21.1	GENCODE	578	chr5	+	17684692	17955966	AAGGTTGCTGTGTGGACCAGCTAAAGCCCTATGTAAGAAAGCACTTCACATACAGAAGAG	intergenic
160	ASHGA5P040048	1.19366e-08	7.53e-07	7.28043	ENST00000515782	RP11-588P8.1	GENCODE	526	chr4	+	101111189	101136662	ATAAATAACATCTACAGACAATTGAAACTATTGACTATAGAATGACGCAGTTGTTTCAAG	intronic antisense
161	ASHGA5P038632	1.47989e-06	2.8232e-05	7.20449	ENST00000454305	RP4-706A16.2	GENCODE	497	chr1	+	77533604	77544167	ATGAAGATGAGAACAGACACACAGCATGTCTTGTACCGAGCATTCTTCTATGTGCTTCAG	intergenic
162	ASHGA5P034950	3.402e-10	7e-08	7.15778	ENST00000445878	AC104695.3	GENCODE	3001	chr2	-	28607275	28617539	AAGTATGACTTTCTCTCCTGTGGCTTTACACAACCTCCTTGAAATTCCAAGAGCAACCCT	intronic antisense
163	ASHGA5P044161	1.0167e-09	1.31e-07	7.11509	ENST00000522805	RP11-87E22.1	GENCODE	898	chr8	-	22752946	22755326	GTTCAAGGATGTGGCCAAAAAAGCAGAACTTCCGACAAACTTGGAAAACTAGTCAGGTTA	intron sense-overlapping
164	ASHGA5P041358	1.58479e-06	2.9403e-05	7.10806	ENST00000514853	CTC-228N24.1	GENCODE	1044	chr5	+	127039081	127277326	GACAAACTCAAGTTCAAGTTCATGTGTTTGAATGTATACTATCATGTTCGTATTGGAAGG	intergenic
165	ASHGA5P041357	3.69e-11	1.5e-08	7.10091	ENST00000513708	CTC-228N24.1	GENCODE	663	chr5	+	127270934	127277199	TCACTGTTTACAGAAAAGTGTTAACATCTTGGACTCGTGAAGCAATGTTTTCACACATTC	intergenic
166	ASHGA5P035635	1.84319e-07	5.86e-06	7.07521	uc002vyh.3	AF055024	UCSC_knowngene	1834	chr2	-	239359012	239360880	CAACCAACATTTTGTTTTGCAACCAAGAGCATTTCAAAAAGCAAAAATATTGCCCTCTAC	natural antisense
167	ASHGA5P051899	3.591e-10	7.1e-08	7.0715	NR_034054	LOC285547	RefSeq	2122	chr4	-	13527942	13533041	GATGTTTGTGAATGTACTTTGTAACTCCTAGAAAATAGGCAAAAAACCGTGAGTGGATGT	intergenic
168	ASHGA5P038419	2.57979e-06	4.2291e-05	7.0688	ENST00000509201	RP11-93K22.6	GENCODE	466	chr3	-	129672947	129688137	CAATTAGAGGATTTGCTAGTACGTAGCAGAGTGTGCAATAAATCTTATTGTTTCATTAGG	intergenic
169	ASHGA5P056292	8.38072e-07	1.8247e-05	7.05351	TCONS_00001818	XLOC_001200	LincRNAs identified by Cabili et al	8915	chr1	-	214427428	214438314	AATCCTATGAATTCTTAGATTGGCGGTGCTGGACAGCAAGTGACCAGAAGAGAAACAAGT	intergenic
170	ASHGA5P043351	2.6291e-09	2.59e-07	7.03114	NR_046103	LOC349160	RefSeq	1538	chr7	-	136583519	136849088	GAAACCAGATTTAAAACTCCTTGAAATCTCTCACTATTTCATCCATCTTGATAGTGCTTG	intronic antisense
171	ASHGA5P020802	4.1e-12	3e-09	7.02882	ENST00000520043	HAS2-AS1	GENCODE	595	chr8	+	122653675	122656933	AAGTGAGCTGGATCTTCTGAGGGGTGGACTTCTTTGGAACTCGACAGGACCTTGAAGACT	bidirectional
172	ASHGA5P035064	4.48176e-06	6.41e-05	7.02595	ENST00000449995	AC016734.3	GENCODE	1334	chr2	-	63869588	63870922	GGTCTCTAGAGACATGTTAGAAAGCTTTTTGTACTTAATTAAAGATAATATAGCATGAAG	intergenic
173	ASHGA5P036172	4.3554e-05	0.000368681	7.01486	ENST00000448672	AC068492.1	GENCODE	469	chr2	+	136835461	136836083	GACTGTGGTATGGTCTCACACCACAAGAAGATTTAAGCAACCTTATTAACTTAATAAAGA	intergenic
174	ASHGA5P043890	1.465e-08	8.75e-07	6.99242	ENST00000478818	RP11-155G14.5	pseudogene	450	chr7	+	128106616	128109225	CAAATGCTCAAGAAAAAGCAGACTTGTATAGTGGCCGATGCAACTACTATTAAACAACAT
175	ASHGA5P036336	1.53673e-06	2.9022e-05	6.95986	NR_026830	SATB2-AS1	RefSeq	3397	chr2	+	200332820	200337481	CCCGCATATTTTGTCGTTCTTAGTTAGGCATACTCCTTTAACACTATTGTAATAAAAGCA	natural antisense
176	ASHGA5P040638	4.51265e-08	2.072e-06	6.94946	ENST00000503529	CTC-210G5.1	GENCODE	579	chr5	-	121772948	121814775	GGTTTTTGGATATGAATTTGTCATTAAGACTACCTGGGCTGACTCTCTTTTCGGACTCAG	intronic antisense
177	ASHGA5P015683	1.79223e-05	0.00018631	6.94575	NR_024183	LINC00521	RefSeq	1891	chr14	+	94463641	94478041	TCTCATGTTGTTATCGCATAATAAATAGGACTTCCGCTGGGAGGGATGGGCACTCCAGGT	intergenic
178	ASHGA5P000033	0.000609228	0.00307575	6.93473	AK022061		NRED	1427	chr9	-	19228914	19230326	CCCCCTGGAAACTATCTTTGACATTGACAATCCGAAGAGCAAAAGTTTAAGAAAGGATCT	intergenic
179	ASHGA5P028513	1.19272e-08	7.53e-07	6.91119	TCONS_00010594	XLOC_004244	LincRNAs identified by Cabili et al	1181	chr5	+	1043538	1045593	ATAAGTTGGGTTGTGTGAATGAGTTAGTGTGTGAATAAGTGGGTGGGTTAGTGTATGAAT	intergenic
180	ASHGA5P030659	1.60015e-06	2.9558e-05	6.8764	ENST00000569467	CTD-2026K11.1	GENCODE	563	chr15	+	75968567	75969503	AAGTTGGTGAAGGCAAAGACCACCTCGCCCTGGTCTATCTGGAATTGGCTGAAGGCCGAG	natural antisense
181	ASHGA5P055218	3.02117e-07	8.451e-06	6.86688	TCONS_00007222	XLOC_003202	LincRNAs identified by Cabili et al	579	chr3	-	106529508	106530486	GTTTTATCAGCCCATATTACTAAATGCCTGACTTCAGAAAAAAAACGTAAACAAAAGACA	intergenic
182	ASHGA5P045762	3.14689e-05	0.000287094	6.8559	ENST00000567129	RP11-109D9.4	GENCODE	965	chr9	+	72287664	72288629	AGTCTGGGGGTGTAGCCTAAAGCATTCTGAAAGTCTTGTTTTAGCTTTAAAATTCATATG	bidirectional
183	ASHGA5P021684	0.00692642	0.0217904	6.83973	ENST00000537998	RP11-243M5.1	GENCODE	409	chr12	+	131462106	131463313	GTTTTGTCAGATTTTTCCTTGTTGTATTGATGGCCCAACTCCATGAGGCAAAGTTCCTTA	intron sense-overlapping
184	ASHGA5P038246	1.45259e-07	4.962e-06	6.83428	ENST00000421735	U73167.7	GENCODE	338	chr3	-	50304072	50304803	TTGACAGTGGCAGAGTGGAGCCCTGAAGTCCACCTGAGTGAATATACCAGGGCTTGAGAA	bidirectional
185	ASHGA5P027954	2.87529e-05	0.000267124	6.8049	ENST00000546738	RP1-228P16.4	GENCODE	3112	chr12	+	48405086	48419252	CGGTCCAGACAGGCTGCTCAGATGTTTATTAAGAAACCACCCATAAAAGTTATTGGAAAC	natural antisense
186	ASHGA5P047503	3.73017e-06	5.6337e-05	6.80021	ENST00000416076	RP11-417O11.5	GENCODE	442	chr10	+	75764894	75787673	GAAGTTTCATTTGTAAAGCTGTTGCTACATCAAAAGAGATGTAAGAACGAGACAGATATC	intron sense-overlapping
187	ASHGA5P055119	3.87298e-07	9.996e-06	6.78655	TCONS_00016146	XLOC_007542	LincRNAs identified by Cabili et al	460	chr9	+	121738572	121742701	AAACACGATTCAAGAGAAGGTGAACACACCATTGTTACTACAGACAGAAGATGGATTGAG	intergenic
188	ASHGA5P036012	7.67668e-06	9.622e-05	6.77935	ENST00000434301	AC092667.2	GENCODE	2586	chr2	+	100721380	100723966	GGGGATTAGAATGTCAGAACTAAAAGGGAACTTTTTTATGTAAAAGAGAAAGAGACTCTC	natural antisense
189	ASHGA5P054279	0.00180448	0.00733366	6.77628	TCONS_00013321	XLOC_005968	LincRNAs identified by Cabili et al	2711	chr7	+	2483191	2488106	AATACTTAAAATTCTTACAGATGGCATGGGAAAGTAGCACACAGTCGGGACTCTGCAGCC	intergenic
190	ASHGA5P051952	0.00131465	0.005678	6.77174	ENST00000504250	RP11-345F18.1	GENCODE	554	chr4	+	56686168	56703548	AGAAGAAACTGTTTAAGCCACTCTCGCAGAATCTGTACGAGTTTATTGAAATAGAGTTCT	intergenic
191	ASHGA5P058551	1.32462e-07	4.611e-06	6.76829	uc010gqq.3	TPTEP1	UCSC_knowngene	1055	chr22	+	17082800	17096000	CCCCTGGACCATCACAGAAGCCGAGCTTCGGGTAACTCTCACAGTGGAGGAAGGCAGGAA	intergenic
192	ASHGA5P030357	2.93318e-05	0.000271308	6.76804	ENST00000565512	PWRN1	GENCODE	433	chr15	+	24758216	24779055	CATATGCTACATGTCTGTGGACCACTATGTGTGTTTAAAGCTTTTTAGTAAAACGTTACT	intergenic
193	ASHGA5P032850	2.08396e-06	3.6076e-05	6.76018	ENST00000577346	RP11-680C21.1	GENCODE	2607	chr17	+	11191521	11194128	GTGTTTTGTATTTTCTTGCATTATGCCATGGAAATTGCTGGTTTCCTAGGTCAAAACAAT	intron sense-overlapping
194	ASHGA5P049640	0.000720133	0.00352473	6.72639	ENST00000579633	AC124789.1	GENCODE	468	chr17	-	36607549	36608607	CTGTGTTCAGACTGCAGAGACCTTGGAAAGGATCAACCATATACAATGTCCATTTCCTGC	intronic antisense
195	ASHGA5P014622	5.57888e-06	7.4969e-05	6.70565	NR_036614	DCLK2	RefSeq	4345	chr4	+	150999425	151178608	TCCGTCATCATGTTTGATTTGACAGTTTGAGAGGCACCTCAGAGTTTCCTTCTTTACCCC	exon sense-overlapping
196	ASHGA5P045108	6.23167e-07	1.4624e-05	6.68473	uc003zhi.2	FLJ35024	UCSC_knowngene	3764	chr9	-	2422701	2622373	GGAGCATCATCTCTCAGGTAAAAATAAATTACTAAGATTAGGACCAAATGATGCAAATCC	natural antisense
197	ASHGA5P045424	3.58828e-08	1.736e-06	6.64787	ENST00000438048	RP11-45A16.3	GENCODE	1854	chr9	-	119048107	119051048	AGACCAGCAAAGCTCAACTACACTTTCTTGCCTGAAAAATAAAACTGTCTCTTAAGAAAT	intronic antisense
198	ASHGA5P041123	1.18771e-05	0.00013438	6.64666	ENST00000515227	RP11-434D9.1	GENCODE	666	chr5	+	67089047	67101066	GAAAGGCTGAGTCTTATAGGGTGTGATTTGGTTCTAGACATGCTTATGTTACTTTTTATA	intergenic
199	ASHGA5P043350	7.36867e-06	9.3004e-05	6.64243	ENST00000439694	AC009264.1	GENCODE	2160	chr7	-	136468821	136866518	ATTATGCTTACCAGCTCTTGTATCCCTTCATGTCAGAACAATAAAAGCTGGATCAAAAAT	intronic antisense
200	ASHGA5P015231	1.07431e-06	2.2126e-05	6.64024	ENST00000418204	AC104135.3	GENCODE	441	chr2	+	75158554	75165545	TGACTGCACCACCCAGTAAAAAGACATCCCTTAACTATGGCAAAACAACAACAACAACGA	intergenic
201	ASHGA5P042560	7.29475e-05	0.000565031	6.59164	ENST00000424162	RP1-60O19.2	GENCODE	419	chr6	+	107143409	107147869	TACTGACGAATTTCACGGACAAAATACTAAGAAGGAAATCAAGTGAATCAAGCGGAGAAG	intergenic
202	ASHGA5P034839	2.54407e-05	0.000244168	6.58829	TCONS_00004691	XLOC_001338	LincRNAs identified by Cabili et al	291	chr2	+	9708628	9712850	GGGGACTTGTCCAAAGTTACTCAACTATGAAGAGTCAAGATTCAAATCCAGAGACATCTG	intergenic
203	ASHGA5P015145	3.38293e-07	9.14e-06	6.55961	ENST00000417264	RP11-533K9.2	GENCODE	155	chr9	+	97247981	97250077	AGTCCGTTGAAGATGAGGAGTCCATTGAAGATGAGGATCTGTTGAAGATGAGGAGTCCTT	intergenic
204	ASHGA5P058483	0.00212762	0.0083557	6.53474	uc004afb.1	AK096159	UCSC_knowngene	2045	chr9	-	68743530	68769869	GTTCTGATATAGAGACATCTGGTGATACTATCTGTTGATTGCAAAGAAAAATATACCCGA	intergenic
205	ASHGA5P041449	8.2787e-09	5.99e-07	6.52523	ENST00000566630	CTB-85P21.2	GENCODE	3379	chr5	+	143861870	143865249	CAGGTGCAGTATCAGTATTGTAAAATTGTATGGTGAAAACTACAAAAGTCATTCTGTGGA	intergenic
206	ASHGA5P043466	2.62197e-08	1.34e-06	6.50862	ENST00000449721	AC091729.7	GENCODE	869	chr7	+	1114085	1117672	TCACAGTGGTGGGAAGTTTCTCTCCTAAAACGAAAGCTTCTCTATACTACAGATTGGCCC	intronic antisense
207	ASHGA5P058477	5.37797e-08	2.318e-06	6.48675	uc003zpr.3	CR627240	UCSC_knowngene	4805	chr9	-	23500688	23672385	CAGGCTCACAGATACCTAAATCATATCAACAAGAAGTTTATGGAAAAGAGAACTACAATC	intergenic
208	ASHGA5P022914	9.31178e-05	0.000683259	6.45925	ENST00000565295	PWRN1	GENCODE	465	chr15	+	24792942	24811927	GCCTCAGAAGGAATTTTATGGAACCTTGTATTCTGTTGAATACCAGAATTATATCAGCAA	intergenic
209	ASHGA5P057886	1.738e-09	1.97e-07	6.43127	TCONS_00023307	XLOC_011177	LincRNAs identified by Cabili et al	1126	chr15	+	24591800	24603338	ATCATATTTCTGCATTCAGGATCATGTTTTCTTGGCTCCATCAGGAACTGTGCAGGACTG	intergenic
210	ASHGA5P032545	1.27127e-06	2.525e-05	6.38084	ENST00000502435	CTB-22K21.2	GENCODE	510	chr17	-	48704392	48709301	GAAACAAGTCTCTTCAGTCACAAAATGTCGTACATCCCGCATATACTAGATTCAATTAAT	natural antisense
211	ASHGA5P015667	0.000186858	0.00118749	6.36931	ENST00000422403	MIAT	GENCODE	594	chr22	+	27053219	27061733	CTGGGCGCGGCAGCTACAAAGACGACGCCGGCTGCGCTCGCGGGACCAGAGGGAGGGAGG	intergenic
212	ASHGA5P045257	0.000417298	0.0022483	6.36177	ENST00000412376	RP11-87H9.3	GENCODE	2033	chr9	-	69082535	69108793	AATGTGGAAACTTCAAACTGTTAAATGCACCCAGGTTAGTTTTGGTAATAGGTCTGAATA	intergenic
213	ASHGA5P056777	9e-12	5e-09	6.34856	TCONS_00008571	XLOC_004067	LincRNAs identified by Cabili et al	601	chr4	-	128015585	128017878	TTGTGAAGAAACTCATTACGGAATTTTCTCCAATACATAGGCAAAAGAAGTGGCTGTTAT	intergenic
214	ASHGA5P041565	1.31532e-06	2.5962e-05	6.34089	ENST00000512115	RP11-375B1.3	GENCODE	491	chr5	+	176170205	176170803	ATTAGTGCGCTTAAGAGGCATTCGGCGTTTATCCCGGCAAACATGCGCAGCGTGAAGGGG	intergenic
215	ASHGA5P041058	2.5693e-06	4.2212e-05	6.31773	ENST00000507027	LINC00603	GENCODE	562	chr5	+	40052392	40053426	GACTGTGAATTGGTAGCAATAAATAAGCCATGGGAAATAGGAGGGAAAACACCATCAATG	intergenic
216	ASHGA5P037651	0.000411543	0.00222296	6.31651	ENST00000429350	CTA-85E5.10	GENCODE	902	chr22	-	30404730	30476219	AGAGGAACACACTGAATTTTAGCTATCTTTTCAAAAAGCGTGAAAAGGGAAGGTTAGATT	natural antisense
217	ASHGA5P048179	2.08686e-08	1.135e-06	6.31542	TCONS_00013319	XLOC_005968	LincRNAs identified by Cabili et al	3365	chr7	+	2479468	2483692	CGGTGGTCTCATCTCTTCTCTCTCAAACCATGGATGGTGCCTTTTAAAGAAAATGACACC	intergenic
218	ASHGA5P057198	0.042684	0.0930166	6.31462	TCONS_00014334	XLOC_006491	LincRNAs identified by Cabili et al	234	chr7	-	68747970	68769122	ACAACAACAAAAAATTATACCCTTTGAACCAGAAATACATTACAGCCCAGTGCTTCCTAC	intergenic
219	ASHGA5P022948	5.74745e-05	0.000463306	6.28131	ENST00000566190	RP11-455F5.4	GENCODE	553	chr16	+	30118995	30121862	CTGCTGCCAGCAAGGTATTGTGGGGGCTGAGTGGGACTTCCTTCTGGACAACAGAGGGGA	intronic antisense
220	ASHGA5P038363	3.45196e-05	0.000308703	6.2811	ENST00000462010	RP11-572M11.1	GENCODE	1253	chr3	-	112769758	112782290	TGTGACCCAGGAAAATTCTAATTCTTAAAACACTCAAGACTCTAAACTAGGGTTTAGACC	intergenic
221	ASHGA5P030245	5.89621e-05	0.000472592	6.27363	ENST00000561358	RP11-343B18.2	GENCODE	571	chr15	-	89340643	89341965	GGCTTCTCAACCTTTGTCACATTGGGCTTGATATTTTTAGTTTCTTTCAGTGGTAAATAT	intergenic
222	ASHGA5P046091	0.000193575	0.0012216	6.26845	NR_037842	LINC00102	RefSeq	1352	chrX	-	2531031	2533388	GAAACCCATTGACAGAATCAACAAGAGGAAGAGACAAATCGAATCTCAAAGAAAAAGCTC	intergenic
223	ASHGA5P031211	1.5167e-09	1.8e-07	6.26203	ENST00000562568	RP11-109D24.1	GENCODE	1995	chr16	-	61725659	61727654	CGTGCATTATTATTACTGCTGTTCAGTGTATTTTCAGTGTTTGAGCCAAGTACTACAAAA	intron sense-overlapping
224	ASHGA5P020097	3.04205e-05	0.000279542	6.23791	ENST00000508106	RP11-526A4.1	GENCODE	704	chr4	-	150509141	150817385	TGGACAGTATTTATTTGTTCTAACGTCCTACATTAGAGATCACCAAGCAAGACTTTTTTC	intergenic
225	ASHGA5P044686	0.00117211	0.00517625	6.23068	uc003wzq.1	AK127443	UCSC_knowngene	3035	chr8	+	20076170	20079205	ACACTGCTAGTCATATAACAATACATACTGGATAACACTGCTAAGTTGGAAGTCATTTGC	exon sense-overlapping
226	ASHGA5P023110	2.16587e-06	3.7291e-05	6.22191	ENST00000570105	RP11-107D24.2	GENCODE	415	chr15	+	24544895	24545785	CAGAGAAACTGGAACACTAAGGCCCATTCTTCCTCTCAAGTATCCAGAAATAAAGTTGCT	intergenic
227	ASHGA5P020812	0.000358036	0.00198731	6.20755	ENST00000520171	RP11-103H7.1	GENCODE	415	chr8	+	127486433	127504841	GGAACAACTGGAACTGGTATACTATAATCTTCCTGGAATAAGAATATGGATTACACAAAG	intergenic
228	ASHGA5P057650	2.49207e-05	0.00024034	6.1933	TCONS_00020373	XLOC_009705	LincRNAs identified by Cabili et al	308	chr12	+	32803413	32810771	TACAGAGGAAGTGATTCATGCACTGTTTTGTCCTGCAGGAGTTCCGGCAAACACAACTTT	intergenic
229	ASHGA5P056790	1.73222e-05	0.000181561	6.18134	TCONS_00008668	XLOC_004182	LincRNAs identified by Cabili et al	331	chr4	-	178141644	178222346	TAACCAAGAGAAATGAGCAAAGCCCGACTGTTGTTCCTACTTTGGCCATTGGAGCTCTTT	intron sense-overlapping
230	ASHGA5P056844	7.01806e-08	2.847e-06	6.15154	TCONS_00009829	XLOC_004243	LincRNAs identified by Cabili et al	320	chr5	+	1042042	1042914	AATGGGTGGTTTAGTGTGTGAATGAGTGGCTGTGAACGAGTGGGTGAGTTTGTGAATGAA	intergenic
231	ASHGA5P043561	6.9213e-09	5.26e-07	6.14046	ENST00000420912	AC004947.2	GENCODE	2781	chr7	+	26591440	26596819	AATGTCTGAGCTCCATGTTAAAGTAAATGTAAGTAATATAAATCTGCCTTTCCTGAGGTG	intergenic
232	ASHGA5P057517	6.233e-10	9.7e-08	6.12664	TCONS_00018460	XLOC_008759	LincRNAs identified by Cabili et al	570	chr10	-	27587362	27596344	AGGAGAAAGTATTTTAAACACAGAAGGGAGTAAGGGAAACGGGAAGAATACCACGTGCTT	intergenic
233	ASHGA5P044170	1.2872e-05	0.000143966	6.12129	TCONS_00014735	XLOC_006820	LincRNAs identified by Cabili et al	585	chr8	+	64366194	64369530	CTGCCTGCATGTGGATTCATTTTAGCAGTTTATCAATTTGGACAGGGAATTTTGAATAAA	intergenic
234	ASHGA5P027659	1.98145e-07	6.231e-06	6.09673	TCONS_00012214	XLOC_005768	LincRNAs identified by Cabili et al	473	chr6	-	77822660	77860954	CTGTCAATACCCAGCTGTGTTATGCCTTCTCACTCCATCAAAACATAAAATAAATAAAAG	intergenic
235	ASHGA5P051828	1.32558e-05	0.000146962	6.06624	ENST00000397644	RP11-513G11.1	GENCODE	416	chr3	-	194019234	194023820	GTGCTATGCCGCGTCAAAAGAGTATGAGAGGTATTGTGGTGATGCTTTTGAATGCTAATC	intergenic
236	ASHGA5P026837	1.0325e-05	0.000121258	6.04196	BX096395		LincRNAs identified by Khalil et al	363	chr6	+	169113703	169114065	CTGCACCAGAGCTGACCCTTCACAGCTACTTAGTGGTTACTTGGAGTTGGTAAAATAATG	intergenic
237	ASHGA5P046462	0.000711391	0.00349816	6.03946	NR_029379	PHKA2-AS1	RefSeq	1332	chrX	+	18908413	18913093	CCAGAAATGCTGAGTCTCAGGTGAAGAAAAAGGCTGATGCCAATAAATGCTGGAAAGACA	natural antisense
238	ASHGA5P041266	3.79325e-08	1.807e-06	6.02243	ENST00000502324	RP11-455B3.1	GENCODE	264	chr5	+	97217123	97235457	AGTCAACAGCATAAAGAGTGGTAAAGTCAGTGCTGCAAAAGATGAAATGTTTTTAATGTG	intergenic
239	ASHGA5P020009	4.7728e-09	4.06e-07	6.00848	ENST00000506683	RP11-526A4.1	GENCODE	386	chr4	-	150273168	150474333	ACTTGGGACCTGGTCCATCAAGATGGCAAAGAAAAATATTCTGAACTAATCAAAAAGTCC	intergenic
240	ASHGA5P048774	5.38369e-07	1.3145e-05	6.00774	ENST00000563041	CTD-2524L6.3	GENCODE	630	chr15	+	72110754	72114796	ACACATCAGTGTAACTAAGAAGTCACTGCTGTTTCTTGGAGTTGGGTTGGAATAGTTGGA	natural antisense
241	ASHGA5P023025	1.41386e-05	0.00015512	5.99898	ENST00000568019	PWRN1	GENCODE	359	chr15	+	24832743	24897263	GTAATGTGTGCTGCTTTTGAGCCACTAAGCTACATGAATTAATGAAGGATCATTATTAAG	intergenic
242	ASHGA5P055219	2.1816e-09	2.27e-07	5.98849	TCONS_00006580	XLOC_003202	LincRNAs identified by Cabili et al	2254	chr3	-	106527860	106531869	CCTGCTATGGCATCACTTTTCCTATTTGTTATTACCACAGGTACAAACTGTTGCCTAAGG	intergenic
243	ASHGA5P048583	0.000971896	0.00445743	5.94876	NR_023915	IPW	RefSeq	4498	chr15	+	25361691	25367623	TTGACTTGTCAGGAAGCAAAAGAATGAATTAAAGAAAACTCCAGAGAATGAGCTGACAAC	intergenic
244	ASHGA5P045480	3.19601e-06	4.9938e-05	5.94618	uc004brf.1	AX747547	UCSC_knowngene	2140	chr9	-	130254830	130256970	TTAAAGAAAAGCAAATGCCTGTGTGATGCTGAGCACAGAAGCCAAACACATACCAGGATT	natural antisense
245	ASHGA5P042093	6.70028e-07	1.5382e-05	5.93972	NR_033919	LOC645434	RefSeq	1690	chr6	-	139790131	139795733	GTTTTCAAAAAACTTCTCCAAGGGAAACTCTTTGAAGTGTTTTTACTGCCATTTGATCAG	intergenic
246	ASHGA5P038842	0.000496215	0.00259729	5.92465	ENST00000423628	ERRFI1-IT1	GENCODE	410	chr1	-	8066073	8066784	GGGAGGATGCAAATTTTCATGTTTGCTTTTCACCTGAATGTATCAAATTTCACTATGCTT	intergenic
247	ASHGA5P021874	0.000105695	0.000755847	5.92376	ENST00000543206	RP11-320N7.2	GENCODE	542	chr12	+	4130142	4135824	AGCTTCGGGTAACTCTCACAGTGGAAGATGAAGAAACTGGGGCTCTGAATGGCATATTAA	intergenic
248	ASHGA5P041364	3.11631e-05	0.000285331	5.92205	ENST00000424244	AC034228.3	GENCODE	923	chr5	+	131339284	131342715	CACACTCAAAATCTGTTGTTTACTGATTGACTTGTGGTAAGGAAACAGCTTATAAAACAC	intronic antisense
249	ASHGA5P038844	1.78078e-05	0.000185271	5.91771	TCONS_00023311	XLOC_011180	LincRNAs identified by Cabili et al	484	chr15	+	24646606	24656639	TCCATCAGGAACTGTGCAGGACTGTGCCCTCTGTTGATACTCACATGGTGGAATTATATT	intergenic
250	ASHGA5P015909	7.05251e-06	9.0455e-05	5.91039	NR_046639	PHEX-AS1	RefSeq	1931	chrX	-	22180848	22191100	GAAATAACTAGACTCCAATTCTGCTCAGGATGACAATGGACTCAACAACAACAACAACAA	intronic antisense
251	ASHGA5P033334	1.402e-06	2.7249e-05	5.90196	uc002jit.1	D43770	UCSC_knowngene	1800	chr17	+	70026956	70035822	AGTGCGCCTAGCAAACGACAGCTTTTTGAGCCTCTGTTTAACAATCTCTTAAACCTTATA	intergenic
252	ASHGA5P040031	0.000381357	0.0020902	5.8994	CB112975		LincRNAs identified by Khalil et al	379	chr13	+	30229248	30229615	CATATGGTGTTCATTGTGGGGTTTTGCTTCTTATTCCCTTTGAGTAAGAATAAAATGATC	intergenic
253	ASHGA5P043335	1.05726e-05	0.000123166	5.8974	ENST00000562524	RP11-2E11.5	GENCODE	2902	chr7	-	130121331	130124233	GGGAATGGAATATGGTACTAAAGTGGGGAGAATGAACCATGAATAAAGTCAGATCCATGA	intergenic
254	ASHGA5P027961	1.31777e-05	0.000146352	5.89389	ENST00000548742	RP11-579D7.2	GENCODE	713	chr12	+	49159976	49161106	AAAGGGGTAAAAGGAAGGCAAAGACAGGAAGGGAATCTAGAGTTCAACCTCCTAACCCTT	natural antisense
255	ASHGA5P020870	0.000105041	0.000752873	5.89379	ENST00000521149	RP11-981G7.4	GENCODE	577	chr8	-	10340433	10375525	AGTCCAGAATGAGTAGAATCCTGTTTCCTTCTGAAGCCCTTCCTAATTGATATACTTAGG	intergenic
256	ASHGA5P056702	3.2172e-05	0.000291203	5.86957	TCONS_00007951	XLOC_003416	LincRNAs identified by Cabili et al	1706	chr4	+	1000613	1002952	TAGACACTCCTGCAGCATCTTGAACATATGGAACATGGTCACAGCATAAGCATGTGTGTG	intergenic
257	ASHGA5P047322	0.0457856	0.0984216	5.85976	uc001iur.1	AX747507	UCSC_knowngene	1361	chr10	+	29743270	29744631	GAGGAAAAGAGGCAAAAAGTATACTGGCTCTCCAAGCTGGGGTGTCTTATTCACCAAGAA	intergenic
258	ASHGA5P038673	1.56993e-06	2.9301e-05	5.83078	uc003bqj.1	AF279782	UCSC_knowngene	1688	chr3	+	6532165	6778421	GTAACGCCCATTTGTTGCATAGTTTTGTGCTCCACACTCTTATCTACAAAATTATGAATT	intergenic
259	ASHGA5P047181	0.00826948	0.0250674	5.82292	ENST00000443633	RP13-137A17.4	GENCODE	2619	chr10	-	134757470	134778793	CTTGGATTTGGGAAATCTCTTACTACATTATGTTTGGATATACTTTCTCTGAGGGGATAA	intergenic
260	ASHGA5P021646	0.000346595	0.00194155	5.8193	ENST00000537095	RP11-143E21.7	GENCODE	511	chr12	-	130640278	130646801	TTTCACCTTAGGGCTGCCACACTTGTGTATCCCTTCTTCCTTGAATTTAACCAGGAGTGA	bidirectional
261	ASHGA5P020981	0.000265524	0.00157672	5.81319	ENST00000523024	RP11-981G7.4	GENCODE	1123	chr8	-	10340387	10405095	AATGGGTATGAGTAGAATCCTGTTTCCTTCTGAAGCCCTTCCTAATTGATATACTTAGGG	intronic antisense
262	ASHGA5P034988	7.15899e-07	1.6103e-05	5.79976	TCONS_00005268	XLOC_002383	LincRNAs identified by Cabili et al	312	chr2	-	169197716	169198115	GATCCAGATTTAAAAGAGTTGCCTGCCAATCAGGAACACCCTTTTTGAGCTTTGGGGATG	intergenic
263	ASHGA5P041164	0.00106544	0.00479279	5.79639	ENST00000514661	RP11-79P5.2	GENCODE	424	chr5	+	72742183	72742811	TACACCTCAAAAAGGCTTAGTTGTTTTTCATCTGCCAAACGTCAAGGGAGCCTCTAGTGC	natural antisense
264	ASHGA5P039019	3.43888e-07	9.272e-06	5.76318	ENST00000434207	RP11-57H12.2	GENCODE	420	chr1	+	95585702	95604110	ACCTGGCATTGGTATCAGGCGCTGGATGGATTACACCAGAGAATACATTACATTAGGAAA	intron sense-overlapping
265	ASHGA5P038392	0.000501712	0.00262065	5.76204	ENST00000468859	RP11-379B18.5	GENCODE	1996	chr3	-	125581416	125606178	CCTGGTGTGTTATGGATGTGGGTGAAATGAAATGTCTGGAATTTGCTTTAAAATATTGTA	intergenic
266	ASHGA5P030671	0.000312433	0.00178421	5.75133	ENST00000567704	RP11-114H24.1	pseudogene	4801	chr15	+	78187025	78197016	ACATCATATTCTCAGTGAAGAGCCCGCCGAGTGCCAGCTACCTGGTGATGGTGTCACGTG
267	ASHGA5P038286	1.57968e-05	0.000168926	5.73555	ENST00000486137	RP11-719N22.2	GENCODE	698	chr3	-	59450055	59496404	TTTTTCTGAAGCGAGAGACAACCCTGGAGCTGATTTTCTGTGTGTGTAACAATGGTGTCT	intergenic
268	ASHGA5P049942	0.00348546	0.0125157	5.7286	uc002kmd.2	AX721193	UCSC_knowngene	402	chr18	+	3473959	3478974	CATACCTGAGGATTATGTGGTTTGTAAACTTGGCACTTAGAAGAACCAATAAAATCATGT	intergenic
269	ASHGA5P020083	4.83653e-08	2.138e-06	5.7135	ENST00000507929	RP11-267L5.1	GENCODE	697	chr8	+	115294300	115307853	ACGCCGAGCTTCAGGTAACTCTCACAGTGGAAGGAAACGACGAGGCTGAATCCTGTTGGA	intergenic
270	ASHGA5P033777	6.52409e-06	8.523e-05	5.70556	ENST00000584331	RP11-296E23.2	GENCODE	361	chr18	+	18896838	18897756	TTATCAAGTATCTTTTATGTGACTAAGAAGTATGATCTGCTGCTCATTTTCCTCACAGCT	intron sense-overlapping
271	ASHGA5P021047	0.0207154	0.0522711	5.70517	ENST00000523977	RP11-65D13.1	GENCODE	248	chr8	-	77527426	77528676	ATTTTAAAAGATGTAAAATCTGAGCTGCAACACTGAACAAAAGCTGTACTTGCCAGCCAG	intergenic
272	ASHGA5P021075	2.09348e-05	0.000210045	5.69767	ENST00000524488	RP11-430H10.1	GENCODE	361	chr11	+	45377050	45378204	CGGCTAGCCGGGTGCAGCAGAAGTCTCAGGTAGCTGAGAAGTTCATGGAATCTTCTTATT	intergenic
273	ASHGA5P027729	1.00695e-06	2.1056e-05	5.6944	NR_028415	LOC100292680	RefSeq	2244	chr12	+	1609656	1613590	TCCCCACCCGTGTGTGTATGTAGGTGTCTCTGTAGACAGTGATTAAAAATACTCCTGACT	intergenic
274	ASHGA5P051083	8.46372e-08	3.229e-06	5.6892	ENST00000438762	AP000473.5	GENCODE	503	chr21	+	18003759	18013002	TTGAAGTCTCAGAACTTCTCAGTACTTGATTTAGACACATAGAAACTTGGGTAAATAACA	intergenic
275	ASHGA5P031864	1.11384e-07	4.079e-06	5.68502	TCONS_00006579	XLOC_003201	LincRNAs identified by Cabili et al	215	chr3	-	106469674	106489988	TATAACCCAGATGGAAACAAGACTCCAAATGCCAGTAAACCAAAGACAACTTGAGATCAG	intergenic
276	ASHGA5P026547	1.94798e-05	0.000198342	5.67935	AK094629		LincRNAs identified by Khalil et al	2028	chr6	-	161411345	161413374	ATGTGCAGATTTCTTAAACCTCATTTAGTTGAGCTTTGATAGGTGAAACGCACGTTTTGA	natural antisense
277	ASHGA5P043828	2.37634e-05	0.000231638	5.66669	ENST00000419422	RP11-132A1.4	GENCODE	705	chr7	+	100951626	100954266	ACTCAATTCAAATATTTAATGGGTTGTACTCTGGCCATTCAGGTGAACAAAATCTGCTGG	intergenic
278	ASHGA5P034981	0.000692824	0.00342279	5.65638	TCONS_00004742	XLOC_001415	LincRNAs identified by Cabili et al	1593	chr2	+	31494728	31496423	AAGTCTTGTTTGTGAGGTTGGAGAAACAATGGCAACACTGGTAGCACCGTAAGCAACCAT	intergenic
279	ASHGA5P025702	7.7e-12	5e-09	5.65182	NR_027116	LOC285768	RefSeq	2248	chr6	-	961240	1101567	TCAGAATCAGTGAATTTTAGGAAAATGACTCGATAACTGCAACGGTGATGTCATGTGTGT	natural antisense
280	ASHGA5P049383	1.53381e-08	8.88e-07	5.62601	uc010ciy.1	BC160930	UCSC_knowngene	2079	chr16	+	89978911	89981576	TATGTCATGACCTGCAGCTGAGCCTACTTCCAATGACCGTGAGATCTGAAAGACTGTTTT	exon sense-overlapping
281	ASHGA5P019736	1.66003e-07	5.464e-06	5.62082	ENST00000502253	CTD-2269F5.1	GENCODE	792	chr5	+	83681296	83696600	AAACAGACTATCCACAGGTTTTCTACTTTTTTGAGCTAAATCGTGATGAAGCAGATGATA	bidirectional
282	ASHGA5P016497	8.92437e-05	0.000660956	5.62036	ENST00000430945	LINC00475	GENCODE	476	chr9	+	94907222	94910588	TGGTGATGAGAAGGCTGCTCAGGACCGAGGCTGAGACGGGCGACCAGGACGGGATTGTAT	intergenic
283	ASHGA5P053748	0.000151632	0.00100918	5.62026	ENST00000438322	LINC00475	GENCODE	424	chr9	+	94903877	94907392	ATCTGATGGTGATGAGAAGGCATGATGCCTCTTGTTCTATTCTTTTTTGTTTCTTCTTTT	intergenic
284	ASHGA5P038945	0.00450642	0.0152811	5.60254	ENST00000460707	RP11-572M11.4	GENCODE	764	chr3	+	112738387	112829322	TTATGATGTTCTATAGAACTTATAGCTGAGCCCATGCCAGGGATTCCCCAGCTCACTGAA	natural antisense
285	ASHGA5P034478	8.9651e-05	0.000663197	5.59293	uc010dyq.2	AK023304	UCSC_knowngene	1302	chr19	+	12305829	12349077	CCCATTTTCAGGGAAGAAAATGAAATATGCCAACAAGGGAACAAAAATTAAGTGCATGGA	intergenic
286	ASHGA5P039018	0.00347349	0.0124762	5.58587	ENST00000482019	RP11-200A1.1	GENCODE	294	chr3	+	134032417	134040013	CCCAGCACTGAGGACATCTAAAACAGTCTTCATTTATTTATTTATTGTTCATAGTGTCCA	intergenic
287	ASHGA5P000055	1.22011e-06	2.4425e-05	5.57353	AK091435		RNAdb	2491	chrX	+	118827530	118830022	GGCCGACGACTGAGACGTGTGAATCAGAACATTCATTTCAATAAAGAGGTTTGGAAACTC	intergenic
288	ASHGA5P043391	0.0020518	0.00812005	5.57286	ENST00000471316	RP11-61L23.2	GENCODE	548	chr7	-	143506675	143533779	GCTACAGTCAGTTAATGAGCCACTGAATCGAACTCATTGAGTAGAGAAATCTATGTGCAG	intergenic
289	ASHGA5P034050	2.88756e-05	0.000268067	5.5695	TCONS_00005041	XLOC_001916	LincRNAs identified by Cabili et al	406	chr2	+	239463184	239468090	TGCTTAAATCCATCCCGCTAAGTGCTGGGGGCTTTATGCGCTATGGGACTCTCAGTCCGG	intergenic
290	ASHGA5P020915	0.0431408	0.0937703	5.55679	ENST00000521894	RP11-65D13.1	GENCODE	821	chr8	-	77523610	77527556	GTCTCTGATGGAAAATTAAGAAAATGAGTCCATTTCTAAGAAGATGTGGTTCGAACATAC	intergenic
291	ASHGA5P020949	0.000370998	0.00204493	5.55343	ENST00000522416	KB-1639H6.2	GENCODE	414	chr8	-	104032414	104033656	ACCCAGGAAGGTGTCAAACGAGGAAGTAGCAGCAGTAACAGATCTACAGATGAAGAAAGT	natural antisense
292	ASHGA5P037827	2.75686e-05	0.000260126	5.54241	ENST00000458178	LL22NC03-86G7.1	GENCODE	3647	chr22	+	22292664	22297799	TGCACATCCACACCTGCGTGTGAAAGAAGATGCTAGAAAAGAACAAAAATAACTTAAAAA	natural antisense
293	ASHGA5P044943	0.00100359	0.00457405	5.53273	ENST00000523831	KB-1615E4.2	GENCODE	331	chr8	+	101487917	101513376	CATGAAGCCTGCGACTAAATAAACGTGTGGGGAAATATTTGTAAGGAAATAAGCTATTAA	intergenic
294	ASHGA5P016970	2.49216e-05	0.00024034	5.52508	ENST00000436101	C20orf166-AS1	GENCODE	761	chr20	-	61144020	61148718	ATGAGCTTTGGTGGTTTAAGGCGTGAATGAATGAAGGAGCAAGCAGTAAGCCCCGACAGC	intronic antisense
295	ASHGA5P047907	0.0013571	0.00582955	5.5104	TCONS_00013440	XLOC_006088	LincRNAs identified by Cabili et al	1257	chr7	+	47622654	47630846	AGACTTTCAGAAGTAACCACCAGAAACTTCGAGTCCCCAGATCCAAACAGCTGAGAATGT	intergenic
296	ASHGA5P043365	1.872e-10	4.7e-08	5.49761	ENST00000461145	RP5-842K16.1	GENCODE	1439	chr7	-	141114182	141116190	TTGCAGATACTCTCTAGTGAAGTATTAATTTCCAAATGTTATCGGCTGACCAACTATATC	intronic antisense
297	ASHGA5P019952	1.75568e-06	3.1484e-05	5.4914	uc001uih.2	FLJ31485	UCSC_knowngene	2915	chr12	-	130636137	130646768	TCCTTTTATGGGCTGCCACACTTGTGTATCCCTTCTTCCTTGAATTTAACCAGGAGTGAG	bidirectional
298	ASHGA5P021475	0.00647643	0.0206308	5.47362	ENST00000533039	AC005152.2	GENCODE	435	chr17	-	70078052	70085261	GGACACAGGATAGCCAAAAACAATCCATTGATACACTTGGTGACATTAATTGAGAAAAAA	intergenic
299	ASHGA5P057379	3.71555e-07	9.768e-06	5.45917	TCONS_00016499	XLOC_007882	LincRNAs identified by Cabili et al	403	chr9	-	136999156	137000408	ACTTCTTAGAGCCTTGGAGGAGATAGAACCTTCTAGTAAAAATGAGAAAATCCGGCCGGG	intergenic
300	ASHGA5P048579	0.00603775	0.0194485	5.44786	uc001ywm.3	PWRN1	UCSC_knowngene	1304	chr15	+	24778838	24832926	TAAAACGTTACTAAAAACTATGACTCACTGTGGTGAAAAAGGTGGCAAAACAGTGACAAC	intergenic
301	ASHGA5P042793	3.77501e-08	1.805e-06	5.44575	ENST00000452366	RP3-471M13.2	GENCODE	658	chr1	+	172876039	172876824	GAAGTGATTCATTACCCCAGTTGGAATGTAAATTCAATGAGTTTAATTACTAGTGGTGTC	intergenic
302	ASHGA5P029129	0.00021805	0.00134459	5.40962	NR_037676	FRMD6-AS1	RefSeq	2246	chr14	-	52116235	52118462	ACTTGGTAAGGTCTTAAATTAATTTGGTACCTACTGAGATAATCCGGCATTTCATGTGTA	intronic antisense
303	ASHGA5P043538	2.04e-11	9e-09	5.39392	ENST00000417460	AC003986.7	GENCODE	692	chr7	+	19159555	19161539	CACTCACTTCACTTGTATCAAAGAGTTGCTGGAATAACTGATGAAAGAATGCAAGAAATA	intergenic
304	ASHGA5P022224	1.79802e-05	0.000186758	5.39379	ENST00000552785	RP11-753H16.5	GENCODE	546	chr12	+	54747575	54860769	AACTTCCTAGAGCCTCGTGAGGTCAGAACGATTGTTATCCCAGTATACAGAGAAGAAGAA	intronic antisense
305	ASHGA5P000498	1.4e-12	2e-09	5.36926	chr7:19668825-19689525+	chr7:19668825-19689525	LincRNAs identified by Khalil et al	20700	chr7	+	19702300	19723000	AGTGACTGTATGGAATACATATGAAAGACTGAGAGAAACTACTGATGCTTTCCAATAACT	intergenic
306	ASHGA5P037322	0.000302645	0.00174165	5.35088	NR_024100	LINC00323	RefSeq	2019	chr21	-	42513426	42519991	AAGTAGGCAGCCAAAAATTTTGGTCTGCTTAATTCTTAGCTCATCTAAGTCTCCAGTTGA	intergenic
307	ASHGA5P030876	5.10454e-05	0.000420851	5.34368	TCONS_00006230	XLOC_002821	LincRNAs identified by Cabili et al	287	chr3	+	129869289	129872415	GTCAGGAACAGTCAGGACTTTGCACCCAGTTGTTGTGAGTGTTGGCCGACCCTTCCTCTT	intergenic
308	ASHGA5P038878	1.01635e-05	0.000120029	5.3162	TCONS_00023877	XLOC_011182	LincRNAs identified by Cabili et al	275	chr15	+	24992109	24997809	GGGCAAGGCCAGCTGTCCCCTGGGATAGTTTGAAGAATGCAGTTTGTTTGTATAATAAAG	intergenic
309	ASHGA5P053317	4.46887e-05	0.000376276	5.30654	ENST00000416220	AC018642.1	GENCODE	561	chr7	-	131008444	131012538	TCAGGGTTTCCCACGTCGCTCGCTCCTTGACGGCTGACCGACACTGGGTCTGAGGTGTAA	intronic antisense
310	ASHGA5P021293	0.00763797	0.0235266	5.30641	ENST00000529667	AC005152.2	GENCODE	340	chr17	-	70067182	70115634	TCAGACACAGGTGAAAACCATCCATTTCTTGGAGAAGTGCCACGGTGGGGTTGCAAGTCC	intergenic
311	ASHGA5P015959	7.17464e-06	9.1351e-05	5.29926	uc002gty.3	USP32P2	UCSC_knowngene	4694	chr17	-	18414575	18445234	GAGATTTAAGAGTTTGGAGAATCTGATGATTATGTGTCTCAGGGATGATCTCCTCGTGGA	intron sense-overlapping
312	ASHGA5P025701	5.51693e-08	2.362e-06	5.29534	NR_027115	LOC285768	RefSeq	2355	chr6	-	961240	1101567	TTCTGTGTAGTGAATTTTAGGAAAATGACTCGATAACTGCAACGGTGATGTCATGTGTGT	natural antisense
313	ASHGA5P030672	0.000172625	0.00111267	5.28422	ENST00000566116	RP11-114H24.5	pseudogene	3716	chr15	+	78268383	78285399	TCCTCGTGTGTTGCAGAACGTGGGCTGTGACTTCGAGATTGACTCCGGTGCTATGGAGGA
314	ASHGA5P032531	3.54942e-06	5.3931e-05	5.28327	TCONS_00029027	XLOC_013950	LincRNAs identified by Cabili et al	1607	chr21	+	43188148	43196304	ATCACAGCTATTTTGAGGGTCTTGACAGCCCAACTAGCAAACAATTCTGCAGGGATGAGA	intergenic
315	ASHGA5P034840	0.000151215	0.00100746	5.2764	TCONS_00003561	XLOC_001338	LincRNAs identified by Cabili et al	454	chr2	+	9705798	9713199	TAAACTTGAGAGGCAAGGCCAACTCTTTTATGTCTTCAAATGCTTTGCTGCCAAACACAG	intergenic
316	ASHGA5P039725	4.03812e-05	0.000348815	5.26302	NR_033995	LOC389247	RefSeq	794	chr4	-	184415889	184425668	GGTAGGGTAGAGAGACTAGAGGGAATGATTTAGCAATAAAATAGGTTTAAATATCTTCTC	bidirectional
317	ASHGA5P028961	3.09887e-06	4.8842e-05	5.25058	ENST00000449453	RP11-199F6.4	GENCODE	344	chr13	+	114580580	114582349	GCTGGCAGAAACTGAACCTGGATTATGAGTGCTGGCAAAAATGTAAACAAAATTATTAAA	intergenic
318	ASHGA5P046425	5.05374e-06	7.0025e-05	5.24348	ENST00000435581	CD99P1	GENCODE	2788	chrX	+	2527432	2575270	TGCAAACATGATGGGTTTTGCACTGATGCTGAGGATGAATCCAACAGGAAAGATACAGAG	intergenic
319	ASHGA5P058367	0.000928402	0.00430154	5.24344	uc001yzq.1	SNORD115-15	UCSC_knowngene	164	chr15	+	25451408	25477615	GCTGAGGCCCGGGTCAATGATGAGAACCTTATAATGTTCTGAAGAGAGGTGATGACTTAA	intergenic
320	ASHGA5P035553	1.65349e-07	5.457e-06	5.24242	ENST00000457625	AC012668.3	GENCODE	228	chr2	-	216444129	216447358	CAGTACTTTTCTGCTAGCTGAAATCAAGGACGGCAAGAAGCAGAGGACATTTGACAGGAA	intergenic
321	ASHGA5P020480	2.64717e-08	1.347e-06	5.23918	ENST00000514368	RP11-434D9.1	GENCODE	756	chr5	+	66915618	67093432	GGAGCTTTCCCTTGTGAAGTGAAAGCAAAGTTTTAAAATTTTTTCTCCTCTGCAAGAAAA	intergenic
322	ASHGA5P052612	2.8791e-06	4.595e-05	5.2249	uc003nkj.4	ZSCAN12P1	UCSC_knowngene	3711	chr6	+	28058928	28063493	TACTTTTTTGTCTTAAAATTACCTTTTCTGAATCCCCTGGATCACCTAAATCCATTTTGT	intergenic
323	ASHGA5P022939	0.000132674	0.000906822	5.21814	ENST00000565893	PWRN1	GENCODE	818	chr15	+	24738283	24758291	ATCTCCCAAGGTTTCAAATAATTCATCAGTGAATTCTTCTCAACCTGGTCAATCATGTGA	intergenic
324	ASHGA5P022994	6.21655e-05	0.000494825	5.2018	ENST00000567341	RP11-510M2.2	GENCODE	230	chr16	+	71496229	71497970	ACTGGAGACTGGGTCAGAAATCAGGAGTGAGGACTTGTTGAAAGAAATAGGAAGGAATCA	natural antisense
325	ASHGA5P058001	1.17026e-05	0.000132644	5.19851	TCONS_00024899	XLOC_011819	LincRNAs identified by Cabili et al	349	chr16	+	87351110	87351640	CAGCCAGGGTCTCGGTAGCCTGCAAGGAGAGAAAGAGGGCGCGGAATTGGAAGCAGTCGT	intronic antisense
326	ASHGA5P026601	0.000427309	0.0022954	5.18347	ENST00000527856	CTD-2313N18.2	pseudogene	1345	chr11	+	71433097	71492229	TCTGCCAATCGTGATGTATGCCAACTCTAGTTTCAGTATCAATGGGATAAGTTCATTCTA
327	ASHGA5P023436	2.2827e-06	3.8713e-05	5.17558	ENST00000580854	BVES-AS1	GENCODE	790	chr6	+	105585165	105616858	TCTTCAAGCTGACTCCATCATAGGACTGGAGAGAGATTGGATGTCAGAGTGATTGATGTG	intronic antisense
328	ASHGA5P032528	4.33803e-06	6.2375e-05	5.17532	TCONS_00029225	XLOC_013950	LincRNAs identified by Cabili et al	370	chr21	+	43194023	43194997	CCCTGAACATCTCTTCTTAATACTTTACAGACTTCAAGTGTATTTTATGGTGACAAAGCA	intergenic
329	ASHGA5P043346	9.40441e-06	0.000113067	5.16943	ENST00000453087	AC008154.5	GENCODE	327	chr7	-	134030822	134035543	ACCTGATGTCCTTTTACTGCTGCCCCTGAATAAAAATTATGCATCTGTTTCCGCACTTGA	intergenic
330	ASHGA5P038730	1.35412e-06	2.6514e-05	5.16858	uc001djh.1	BC037304	UCSC_knowngene	2715	chr1	+	84543635	84546350	CATTTGGAGCAGTGTTATCAGGTATATGTTGCTGTTCTGTAGTGAACAAAGAAATTGTAT	exon sense-overlapping
331	ASHGA5P029862	0.000123435	0.000852407	5.15627	NR_040057	LOC283683	RefSeq	1445	chr15	-	23094330	23115254	GCTATTTCTTCCTTAAGCATTTGGAAAGAATTCACTTATTAAGCCATGTGAGACTGTAGT	exon sense-overlapping
332	ASHGA5P019007	2.143e-10	5.2e-08	5.15597	ENST00000464242	RP11-475N22.4	GENCODE	1163	chr3	+	128208054	128216209	CTCAGCGCAGCTTACGATTCTTCATCAACTCGTAAAATGAGATCGCCGCGGAGCTCGAGC	intronic antisense
333	ASHGA5P028516	2e-13	1e-09	5.1402	TCONS_00010597	XLOC_004244	LincRNAs identified by Cabili et al	1623	chr5	+	1043854	1046915	TTAGTGTGTGAATGGATGAGTTAGTGTGTGAATGAGTGGGTTAGTGTGTGAATGAGTCGG	intergenic
334	ASHGA5P044758	0.00179744	0.00730973	5.13557	ENST00000520819	RP11-11N9.4	GENCODE	712	chr8	+	32853695	32902320	CTGCAGGTTAAGAGAAATTGAGAAACGATGGAGAATTTAAGTGTTTTAGATCCTACATAC	intergenic
335	ASHGA5P040462	2.0004e-09	2.16e-07	5.13239	ENST00000502882	RP11-158J3.2	GENCODE	219	chr5	-	63253719	63276870	CAAGAATGGAGAAGGAACATCCAACTGGAGCATAATTGTCAAGGCAATAGAGAATTTAGA	intron sense-overlapping
336	ASHGA5P039703	6.60128e-07	1.5237e-05	5.08697	ENST00000507525	RP13-577H12.2	GENCODE	233	chr4	-	175898721	175900532	TCTGGTTTAGCAGAGATACGGTTCCTATAAAGTAGAGTGAAAAAGAAGAAAGGATTTGGA	natural antisense
337	ASHGA5P058140	0.00106416	0.00479041	5.07723	TCONS_00026957	XLOC_013014	LincRNAs identified by Cabili et al	279	chr19	+	22715523	22716267	GGCTCAGGAGTGGCAACTCTAGTGTGTGAGAAAATTAATGTGACAGCTGAATTTGTAGAA	intergenic
338	ASHGA5P036994	3.92092e-06	5.7905e-05	5.0743	ENST00000376445	RP13-401N8.1	GENCODE	320	chr20	+	25731853	25733397	CTGCAGAAAATCAAGCTTTGAGCGGGAAGCTTCGAGGAGACACAGTGTCACAATTACAAG	intergenic
339	ASHGA5P026553	1.93251e-05	0.00019749	5.0716	R66218		LincRNAs identified by Khalil et al	462	chr6	-	163789685	163790060	AACAAGCAGAGAAGGCCCAGGGTCGGTTTATTGACTTCTAAGGACTATTGGTCTTTTGCA	intergenic
340	ASHGA5P045124	6.22486e-08	2.578e-06	5.06924	ENST00000418571	RP11-134K1.3	GENCODE	485	chr9	-	8700594	8701552	GGATTTGTTCACTGCTTAGTGATGGTAAAGTCAAGAGTTTTCTTTAATTACTCTCCATGA	intron sense-overlapping
341	ASHGA5P058657	2.15782e-08	1.163e-06	5.05048	Y13808		RNAdb	205	chr3	+	15907723	15907924	CTATCCTGGGTAGGTAGGACCTATAATCAGAAAAGTATCCCAAATATAGAAAGGTTATTT	intergenic
342	ASHGA5P047504	1.03134e-06	2.139e-05	5.04073	ENST00000426210	RP11-417O11.6	GENCODE	941	chr10	+	75788170	75789962	AGTGAATCAGGCCAGTTATAAGCACTGGGGAGTGATGGCAACTGTGGTTAACTGGAAAAT	intron sense-overlapping
343	ASHGA5P021544	0.000178624	0.00114377	5.03078	ENST00000534540	MIR210HG	GENCODE	367	chr11	-	567525	568369	GGGATCCCAGGGTACCAGTGTGCGGAGTTCCTGTTGCCAAGCTGAAGGTGGCCCTGGGCA	intergenic
344	ASHGA5P051222	3.7389e-07	9.787e-06	5.02917	uc021wmd.1	BCR	UCSC_knowngene	1500	chr22	-	21642517	21644017	TCCCCAACAGATCCAGATACCTAATAAGATGCTGGAATGTAATCCCTGGACAATCCGTGT	intergenic
345	ASHGA5P054975	6.795e-09	5.26e-07	5.02156	TCONS_00010599	XLOC_004244	LincRNAs identified by Cabili et al	690	chr5	+	1046023	1046915	AGTGTGAATGGGTGTGTGAACGAGTGGGTTAGTGTGTGAATGAGTGGGTTAGTGTGTGAG	intergenic
346	ASHGA5P038624	0.000126974	0.00087494	5.01009	ENST00000458224	RP11-407B7.1	GENCODE	433	chr3	-	193723244	193788759	TAAAAATCACAAGGATTCATGGATGGAAAACTGAGACTCAGAGAATGATCACATTCACAT	intergenic
347	ASHGA5P029480	0.00038098	0.00208904	4.99857	ENST00000552826	NOVA1-AS1	GENCODE	449	chr14	+	27106446	27275587	TGAAAATTACTGAGGAAGCCTCTTAGCCTATGTGCTCTGAGAGTAGTGACACCTAGCAGT	intergenic
348	ASHGA5P040549	4.34144e-06	6.2375e-05	4.99013	ENST00000511417	CTD-2316B1.2	GENCODE	592	chr5	-	87008951	87029086	CAGTTATATTGAAACACCATTCAAAACATCACAACAAGAAATGCAGTCTACTATAAACTG	intergenic
349	ASHGA5P019690	0.000324016	0.00183711	4.97342	uc009yby.2	MIR210HG	UCSC_knowngene	2002	chr11	-	565659	568457	GGGGTCGCAGGCCTGCAGGAGTTGAGGGCTGCACCTGCTCGCTGGAGAGGGAGAGGCAGA	intergenic
350	ASHGA5P046424	1.2135e-06	2.4331e-05	4.96728	ENST00000430562	CD99P1	GENCODE	984	chrX	+	2527434	2556370	CCTTGTTCCCAGGGTCCACATTTAGTTTTATCTTTACTGCATTGCTTTTATGAAAAAGAA	intergenic
351	ASHGA5P058388	0.000122962	0.000850697	4.96299	uc002mij.2	CLEC4GP1	UCSC_knowngene	1910	chr19	+	7852369	7855898	TGGTCGCCAGTACTGTGGGCTGTGATTCTGAGTATCCTATTGTCCAAGGCCTCCACGGAG	intergenic
352	ASHGA5P030322	0.000463703	0.00245551	4.95764	uc021sxp.1	AK093600	UCSC_knowngene	1903	chr15	-	100605272	100607374	TGTGATGTGGTATAGGTCAATTCTGGTTTTCTGCTGTATGTTGTTTGAACTTTTGTATAC	intron sense-overlapping
353	ASHGA5P030159	2.58509e-05	0.00024686	4.95666	ENST00000501931	RP11-24M17.7	GENCODE	3188	chr15	-	76020010	76030964	TTCCAGGAAAAATTGAAGGCTCCGGATGAGAAAAAGCAAACAAAGGACAGTGGGACCATG	natural antisense
354	ASHGA5P026548	1.15113e-06	2.3302e-05	4.94071	AK094629R		LincRNAs identified by Khalil et al	2028	chr6	+	161411345	161413374	TCAAAACGTGCGTTTCACCTATCAAAGCTCAACTAAATGAGGTTTAAGAAATCTGCACAT	exon sense-overlapping
355	ASHGA5P043401	0.00483473	0.016195	4.93906	ENST00000427825	RP11-469A15.2	GENCODE	507	chr1	+	200443047	200447421	ATACTTAATATGTTGCAGTTTCACAGTGAAAGTTGGCAAGTCCAGGGTGGGAACATGCCC	intergenic
356	ASHGA5P049817	4.83567e-07	1.1965e-05	4.93686	TCONS_00020805	XLOC_010097	LincRNAs identified by Cabili et al	1415	chr12	-	57477094	57481617	TTGCATTGTGTGTTATAGACTCTGAAGGAGATTCTTGTTGTTTTGAGCAGTGTCCTCATT	intergenic
357	ASHGA5P031786	0.00019132	0.00121039	4.93277	ENST00000560487	CTD-3032H12.2	GENCODE	359	chr16	+	54968824	54988577	CCAACTCCAATGCGTAGTGCTCATTTTGGACTTGATAAATAAACTTTCATTGTCTTTAAG	intergenic
358	ASHGA5P015448	1.62015e-06	2.9754e-05	4.90846	ENST00000420293	RP11-61I13.3	GENCODE	440	chr6	-	39856649	39865156	ATCAGGAAAATGCTTCTCCAGGATCATGATCAGGAGGTCAATGTCACTCTTCTCTGGGAT	natural antisense
359	ASHGA5P016346	0.000608568	0.00307364	4.90466	uc003ftr.2	LOC100131551	UCSC_knowngene	1718	chr3	-	194017423	194030593	AACAGAACAGATATATCCAGTGCTATGCCGCGTCAAAAGAGTATGAGAGGAGCATTCCAG	intergenic
360	ASHGA5P045821	0.000672506	0.00334196	4.90453	ENST00000416438	LINC00475	GENCODE	2000	chr9	+	94903748	94921890	CAGGGAAGGGAAGGTAATTGAAAGTTTACAAAAACAAAACCCCATTCACATTCTTAAAGT	intergenic
361	ASHGA5P036138	2.33122e-07	7.074e-06	4.89199	ENST00000450840	AC079776.3	GENCODE	2398	chr2	+	130680749	130704276	CGACCACTACATGCAACATTATGGATGAAAATACAATTGCGGAAAGACATTTTCTCAAAA	intergenic
362	ASHGA5P040662	0.0016617	0.00685228	4.88502	ENST00000502827	RP11-346A9.1	GENCODE	786	chr5	-	128795251	128796382	CACGACTAGAGAGGTGGGTTGTAGAGCAGAAAAGAATCAAGCACATCTGACCAGAAAAAG	natural antisense
363	ASHGA5P014708	2.27054e-07	6.95e-06	4.86736	ENST00000412669	AC002456.2	GENCODE	449	chr7	-	90219936	90226667	AGGTCCCAAGGTAATTGTACATTTTTTCATCCTACATCTCAAGAGACCAAGGGACCTAAG	intronic antisense
364	ASHGA5P021507	0.000101371	0.000731121	4.86511	ENST00000533672	RP11-736K20.5	GENCODE	239	chr11	-	86632963	86636079	ACTCCCCTCGGTGACCAGTGGTCCTCCTTTCTGAAGGCTCTTGCTACAAAGGAAAGATGA	intronic antisense
365	ASHGA5P015046	1.583e-10	4.4e-08	4.86251	ENST00000415965	AC002456.2	GENCODE	317	chr7	-	90219932	90225062	ACTGGGTGCGGTAATTGTACATTTTTTCATCCTACATCTCAAGAGACCAAGGGACCTAAG	intronic antisense
366	ASHGA5P017076	1.49296e-08	8.76e-07	4.85334	ENST00000437389	RP11-305L7.6	GENCODE	302	chr9	+	93932950	93944999	ACAGAGCAAGGCGATTACTTTAAAACATGAAAGAAATTGCACCTTTTCCTTAAGGGCAAG	intergenic
367	ASHGA5P057837	2.58157e-07	7.503e-06	4.84169	TCONS_00022499	XLOC_010825	LincRNAs identified by Cabili et al	657	chr14	+	51411364	51413305	ATCCTTAGAGATTCTGAAGTTTGGACTTGAGCTTTTGGGGCAGAGACTGAATTGGGCCTT	natural antisense
368	ASHGA5P036086	0.00011749	0.000820745	4.83725	uc002tji.1	AK123617	UCSC_knowngene	3471	chr2	+	113963502	113966973	CTAATTTATGGCATGCATATCATATGAGCAGTCTCAAATCCTCCCCAGAACAAGGTGAGG	intergenic
369	ASHGA5P056598	3.47146e-07	9.281e-06	4.83142	TCONS_00006505	XLOC_003111	LincRNAs identified by Cabili et al	1171	chr3	-	46876674	46888307	CTGTGTCCAGATGTTTATCGAGTGCCAGACATGTTTCAGGTGCTGGGAATACAGCAATAA	intergenic
370	ASHGA5P039326	0.000103414	0.000742891	4.83064	ENST00000504402	RP11-367J11.3	GENCODE	292	chr4	-	7096297	7105056	GCCTCAGCCAAGTGAAATGGGAATCAGGACCATTACAAAGAAATTCAATTAAAATAAAAG	intergenic
371	ASHGA5P045016	0.00109917	0.00491834	4.8145	ENST00000521428	RP11-103H7.2	GENCODE	489	chr8	+	127510393	127512548	AGGATAGGAGAGACTACTTTTGCCTTGAGGGGAAGAAAGAAGTCAGGGGCTGGCTAACAG	intergenic
372	ASHGA5P038146	7.5594e-09	5.63e-07	4.79464	ENST00000413430	RBMS3-AS3	GENCODE	613	chr3	-	29305684	29332217	TGTGTAGGCAAAACACAATAGTCTCCAATGCCAAATAAACTTTGTTTTGTTACTCTCTCA	intronic antisense
373	ASHGA5P020612	1.37505e-05	0.000151387	4.79357	uc003xia.1	AK057935	UCSC_knowngene	902	chr8	-	30239641	30242917	AGTTTTCGAGGGGAACAAACATGTATCCTGGATGAAAATAAACCAACTCTTGAAACTGCA	natural antisense
374	ASHGA5P037417	2.51958e-06	4.1496e-05	4.78461	ENST00000456904	AP001442.2	GENCODE	430	chr21	+	27306611	27307584	CACAACTAAATTTACTGAAGTCAGGGCAGCTGAAGTAATCTATAAAACTTAGCATGTCAA	intronic antisense
375	ASHGA5P045315	0.000793611	0.00379852	4.7763	ENST00000425666	RP11-389K14.3	GENCODE	1013	chr9	-	93063183	93195771	TGGCAGGGGGTGGGTATAACCTATGTCAGTGTTTTTCAATGTGAGCAAATTTTAATAAAC	intergenic
376	ASHGA5P047919	0.000252561	0.00151036	4.76691	ENST00000531111	CTD-2371O3.2	GENCODE	597	chr11	-	9451902	9455033	TAATTTACCTAAAAAGGAAAAAACAACATTCTCGAAAAATGCAAACAACTATGAAAATAA	intronic antisense
377	ASHGA5P032705	0.00128373	0.00557484	4.75482	ENST00000431729	RP11-191N8.2	GENCODE	423	chr1	-	222001007	222014008	GGCAGATCACCAAAGAACTCAAGATGTACTGATATTTTGCCAGTTTCCTTCATCAACAAC	intergenic
378	ASHGA5P035122	7.982e-10	1.16e-07	4.74897	ENST00000437233	AC084149.2	GENCODE	284	chr2	-	77879538	77881794	CATTTCTGATGGCTTTTATCCATCCTGCCCAAATAAAATAAACAAATTACCCTGCTACTT	intergenic
379	ASHGA5P026343	8.239e-10	1.18e-07	4.7481	ENST00000525563	RP11-495O11.1	GENCODE	249	chr11	+	45673078	45674241	AGGGAGCATTCCTGACCTCGATGCACCTCATAGAGTCTGAATTAAAACACCAAGATCGCC	natural antisense
380	ASHGA5P042118	5.1508e-09	4.21e-07	4.74231	ENST00000448909	RP11-307P5.2	GENCODE	603	chr6	-	148062569	148064460	CCGCATGCAACATATTTTGAAAACAGATACACTTCAACAGTTCAGAATATGCTAGTACTA	intergenic
381	ASHGA5P017033	7.8602e-05	0.000597866	4.71277	ENST00000436878	AL035610.1	GENCODE	822	chr21	+	29462763	29475559	TTGATTAAAGACATCTACCCCTGGAGAAAGAGCCCAATGAGAAGTAATCTCTGAAGCCCA	intergenic
382	ASHGA5P016824	0.00727444	0.0226435	4.71246	ENST00000434703	AC005152.2	GENCODE	3032	chr17	-	70067183	70112157	AGGTAAAGCGCAGCCAAAAACAATCCATTGATACACTTGGTGACATTAATTGAGAAAAAA	intergenic
383	ASHGA5P010755	6.16202e-05	0.000490793	4.70937	ENST00000367276	LINC00475	GENCODE	738	chr9	+	94903579	94910588	CGGCTTACCTGCTGCTCAGGACCGAGGCTGAGACGGGCGACCAGGACGGGATTGTATGGC	intergenic
384	ASHGA5P042581	2.59044e-06	4.2356e-05	4.70308	ENST00000425503	RP1-142L7.5	GENCODE	544	chr6	+	112475966	112479534	CCGACCAGTTTTACTTAAGACACTTGGGTGTGGAAAGATAATGCTGTCTATGAAATAAAT	natural antisense
385	ASHGA5P022130	1.55404e-06	2.9218e-05	4.69351	ENST00000549901	RP11-152F13.2	pseudogene	4809	chr15	+	82751613	82762144	TCACACAGAGGGGCCCTGGACGGAGGCATCCACTTTGGCCTCTCTGACGGTGAACATACT
386	ASHGA5P033018	1.16239e-05	0.000131988	4.6896	TCONS_00029138	XLOC_014080	LincRNAs identified by Cabili et al	1071	chr21	-	40388682	40390969	TGTACATGCGTGTTATTAGAGGCGAATGCACGTTTTTGTTACTGAGAGAGTGGCCCTAGA	intergenic
387	ASHGA5P014904	3.8001e-05	0.000334176	4.67739	ENST00000414603	AC069277.2	GENCODE	517	chr3	+	6532489	6599646	GCTTACATTCTTGTATAGGGATTACTTTCCTCACTTTGTTATATATCCTGGAAGCTATGA	intergenic
388	ASHGA5P021489	2.26588e-05	0.000222929	4.67318	ENST00000533289	CTD-2313N18.7	pseudogene	216	chr11	+	71589498	71595604	AAGTAAGGCAAGAAGCTTCACTTCTAATGATGAATGTCCTTCAGAATATTATCATTGCAG
389	ASHGA5P035328	5.44635e-07	1.3247e-05	4.66671	NR_036549	LOC100129961	RefSeq	1422	chr2	-	135624202	135676176	TATATTGAGGTTCTGGAGTGATTCATCCTACCCTCATACATAAATGTTTGTGCTAACCAG	natural antisense
390	ASHGA5P047724	4.60811e-06	6.5391e-05	4.66457	ENST00000433600	RP11-498B4.5	GENCODE	778	chr10	+	118429613	118432250	CCTCTTTTTGAAACAAGAAAAGCGCATCGTAGAAACCAAGATTCTGTACAATATTCTAAC	natural antisense
391	ASHGA5P033682	0.00384904	0.0135599	4.66076	uc002lnm.2	AX746671	UCSC_knowngene	1844	chr18	-	77674211	77676055	GTTTAAGATGACGTATTTAAAATGTGCACACACACGTACTTAACAGATACCCAAAAAACC	intron sense-overlapping
392	ASHGA5P018249	0.00439	0.0149498	4.66007	uc010fkt.3	LOC654433	UCSC_knowngene	2029	chr2	+	113993106	114024580	CATTAAATGCTGAAAGAACATCAGTGTATCAGCACAGCAAATATTCCAAATGCCAGGCTG	intronic antisense
393	ASHGA5P016458	9.68684e-07	2.0425e-05	4.65847	ENST00000527459	CD99P1	pseudogene	561	chrX	+	2527455	2541494	AGCCTGGATTCATTGGGGATGACTTTGACTTAGCAGATGCCTTACATGACAAAGGAAACT
394	ASHGA5P045586	0.00207816	0.00820131	4.65213	uc003zfx.3	AY343892	UCSC_knowngene	532	chr9	+	72697	75294	TTGAAACCTGCTGGGACTTTTTAGCCATTCTCTTCAACATAAAGAATGGGTGTTTTTGGA	intergenic
395	ASHGA5P056420	0.000892311	0.00416451	4.65054	TCONS_00004137	XLOC_001980	LincRNAs identified by Cabili et al	1213	chr2	-	9344858	9346352	TGACTCAAGTCTCTTAAGGAAATTCTCGGTTATACTGAAAAATCCAGAAGCTCTGAAGAT	intergenic
396	ASHGA5P043475	1.8817e-09	2.09e-07	4.64028	ENST00000313156	AC004840.9	GENCODE	2067	chr7	+	2477397	2487485	TTCTTGTTTCCTTCTTCCAGAGGGTGTAGGAGTTGTGTTCCAAGTTTGTTCCTGCAAACC	intergenic
397	ASHGA5P018776	2.45303e-05	0.000237501	4.63788	NR_021487	KIAA1908	RefSeq	3873	chr7	+	1609708	1629261	CTCTCTCTGGAACGGTGAAGGAATCTGAAGCCCAGAGAGGGAAAACAATGCCTCCTGGGT	natural antisense
398	ASHGA5P052504	0.000234795	0.00142815	4.62615	ENST00000518818	CTC-308K20.1	GENCODE	2067	chr5	-	172382156	172386380	TGTGGTTCAGTAAAATTAAAACAGGCACAATGATATCCTGGATGACAAGAGCTGGAGGCT	intronic antisense
399	ASHGA5P028453	2.66566e-06	4.3418e-05	4.6213	uc001use.3	BC048278	UCSC_knowngene	1820	chr13	-	29067434	29069254	GGTAACTTCTGAGAACTCACTGTAGGTTGGGAAAGGTGCTAACATAACTATATTAAATAA	exon sense-overlapping
400	ASHGA5P040140	2.06453e-06	3.5797e-05	4.6206	ENST00000436680	BX571672.1	GENCODE	552	chr1	+	143119060	143206097	CCAGAAATACAGTTCTGCTGCATAGTGAAAAAAGGCCAATTTAGATTCTTTTTCATAGAG	intergenic
401	ASHGA5P033566	0.0150047	0.0403695	4.59854	ENST00000568243	RP11-408H20.1	GENCODE	554	chr18	-	28638805	28639359	AGTCCCAGAAGTGATATAATATGTTCACGGAGACGTACTATTAAAAAGTGCCACAAAAAA	intergenic
402	ASHGA5P047776	6.27803e-05	0.000498466	4.59785	TCONS_00013639	XLOC_006301	LincRNAs identified by Cabili et al	463	chr7	+	154795153	154806834	GGACCCGGCTATGCCGTGACGGAATTCCCGAGGCCGTAGCGCCACGCGAGACGCGCACTG	intergenic
403	ASHGA5P014686	4.45608e-05	0.000375948	4.59703	ENST00000412492	BX004987.5	GENCODE	372	chr1	+	143391525	143392104	ATCCATTTACAGTAATGATTCTCATTATGGAGTCATTTGATGATTAAGACCAGTTGGCAT	intergenic
404	ASHGA5P040252	0.00195765	0.00783305	4.57515	ENST00000507023	RP11-130F10.1	GENCODE	2161	chr4	+	178366132	178598280	ATACCTGGCAGCTGACCGTCAAATCTTATGAAGGATTAAAACATAAAGTTTGCATTAAAG	intergenic
405	ASHGA5P016208	1.12292e-05	0.000128195	4.57438	ENST00000427929	AC104695.3	GENCODE	2850	chr2	-	28607275	28617539	CTTGCTCCAGGATCTGCACAAGCAGAGGCGGCACAGGGTTTGGCTTCCAGTTGGGAAATG	intronic antisense
406	ASHGA5P037796	8.85974e-05	0.000657254	4.56233	NR_026651	DGCR10	RefSeq	944	chr22	+	19010136	19011063	GAAACTGAAGCATGAACACAACCCCAGACTGGAAATAAAAAGCCGTCATGTACTGTGTGC	intergenic
407	ASHGA5P043679	7.51459e-05	0.000578171	4.55104	ENST00000449899	RP11-310H4.3	GENCODE	543	chr7	+	55661469	55662699	AAGTTCATGCCCACTGGGAGTTACTGAAGTTGTGAATGATTACATTTAAACTTATCCTGT	intergenic
408	ASHGA5P040408	0.0142095	0.0385574	4.5411	ENST00000510137	CTD-2263F21.1	GENCODE	337	chr5	-	38466264	38468441	GCAGAGCTGCCAAGCTGACCACTTAAGGCGCATGAGGAATAAACACTCGTTGCTGCATGC	intergenic
409	ASHGA5P030066	9.8914e-09	6.6e-07	4.535	TCONS_00008011	XLOC_003475	LincRNAs identified by Cabili et al	413	chr4	+	24667010	24670951	TTAAACATGTCAACATCTCAACAATTGCTGATTTTTCAAGTGCTATACGATGCATCTGGC	intergenic
410	ASHGA5P029428	5.19957e-05	0.000427018	4.52808	TCONS_00016160	XLOC_007571	LincRNAs identified by Cabili et al	206	chr9	+	130349967	130354487	ATCCTGTTTCTCAGAGAGGAAGACAGACACTCTTAGCATAATGAGGGTCAAAAGTTGGGC	intergenic
411	ASHGA5P028462	4.266e-10	7.9e-08	4.49296	TCONS_00010578	XLOC_005101	LincRNAs identified by Cabili et al	291	chr5	-	177479412	177479818	CGTGGAATTGCCAGTTGTTCAAAATAAACCTCTAAATGATCATCGTAAGACATTTCATCA	intergenic
412	ASHGA5P058011	8.08421e-06	0.000100336	4.48253	TCONS_00025345	XLOC_012165	LincRNAs identified by Cabili et al	717	chr17	+	29904908	29912680	ACAGCTCCAAGGAAGCCAGAATCCACTTCCCCAAATGTATTCTTCAAGGCATATGCACAA	intergenic
413	ASHGA5P048793	1.0025e-09	1.31e-07	4.47002	ENST00000562009	CTD-2311M21.2	GENCODE	3337	chr15	+	74646796	74656961	TACTATCAGCCATGGTCAACCCCACCGTGTTCTTTGACATCGCAGTCACGGCGAGCCCTT	intronic antisense
414	ASHGA5P053449	0.0183998	0.047623	4.45978	ENST00000520944	SNHG6	GENCODE	638	chr8	-	67834052	67837831	TAAGAGCTGTCTTCCGATGTCGCTCTTCCTTTCCCGCGCGACCGGCGAGGGAGGAAGAAG	natural antisense
415	ASHGA5P033187	2.24561e-06	3.8351e-05	4.43789	ENST00000495536	CTD-2377D24.4	GENCODE	532	chr17	+	46810452	46811250	TGAACTGCTTGGGGTCGCCCGGCTCCTCTCGATTTTATGAAAATGGCCTAATTGAGGTGT	intergenic
416	ASHGA5P032455	5.69725e-07	1.3699e-05	4.43479	TCONS_00029721	XLOC_014397	LincRNAs identified by Cabili et al	256	chr22	-	45894163	45894662	CTATTTGAATGGAGGTCATCTGACTCCCTTTGTATCTTGGGTTCTGTTTTTCAATAAAAA	intergenic
417	ASHGA5P033569	6.03003e-08	2.512e-06	4.43177	ENST00000580937	RP11-650P15.1	GENCODE	433	chr18	-	29076607	29077158	CAGCACCGGATTACGAAACTTCCAAGAAATGTAACGACTGAAAGTAATGGACGAGCCTAT	bidirectional
418	ASHGA5P036088	0.000173326	0.00111662	4.41387	ENST00000555766	AC016683.6	GENCODE	1499	chr2	+	113995110	113997485	ACCATTAGCACATAGCAGCAATTATTGACTAAATGGTGCTCTGGTTCCATGCCTTCCAAG	intronic antisense
419	ASHGA5P057023	2.45187e-08	1.272e-06	4.41285	TCONS_00012039	XLOC_005574	LincRNAs identified by Cabili et al	498	chr6	-	1308820	1311276	AGGTGGAGCTTGACCAAACACTTGTAGATGCTGAACACTGGAAAAATCCTGCAAGGATTG	intergenic
420	ASHGA5P058139	6.8373e-09	5.26e-07	4.40949	TCONS_00026956	XLOC_013014	LincRNAs identified by Cabili et al	611	chr19	+	22715447	22716359	GGCTCAGGAGATGAACCAGGACTTATCCGAAGGTACCAAGTGAACTTCTAGGAAAAGTCC	intergenic
421	ASHGA5P038120	0.000348674	0.00194729	4.40797	ENST00000525575	RP11-536I6.2	GENCODE	613	chr3	-	14313872	14345345	AGGAAGCTGAGGGTCACCCAGACAAGAGGAGGTGCTGGAGGTCACACAGTGAATATGCCT	intergenic
422	ASHGA5P021014	2.76858e-07	7.937e-06	4.40491	ENST00000523411	RP11-419C23.1	GENCODE	639	chr8	-	36924958	36926936	ATCTTCCTCGAAAAAGTCCTCAGGGTGCAAAGAAGAGAAATGCAATAAAATGATAATGAG	intergenic
423	ASHGA5P058165	3.77439e-06	5.6694e-05	4.40099	TCONS_00027244	XLOC_013275	LincRNAs identified by Cabili et al	700	chr19	-	23487811	23493504	AGTCACCTTGTCTATCTTCAATTTACAGACCTTGGCTTTTCTACCCCAATTCAAGAAGTC	intergenic
424	ASHGA5P017567	5.38852e-06	7.3265e-05	4.39805	ENST00000443198	RP13-492C18.2	GENCODE	580	chr7	-	56494551	56516068	ACAAGAACCAATTCTGTTAGCCTATCGAAAATGCAAGATGCAGTTCTTTCATGGGAACAC	intergenic
425	ASHGA5P056098	1.04785e-05	0.000122721	4.38795	TCONS_00027241	XLOC_013275	LincRNAs identified by Cabili et al	384	chr19	-	23487808	23493434	CAATTTACAGACCTTGGCTTTTCTACCCCAATTCAAGAAGTCACTTCTTCAGTCAACCAA	intergenic
426	ASHGA5P058431	1.44098e-07	4.935e-06	4.38261	uc003mtj.3	LOC285768	UCSC_knowngene	2336	chr6	-	961240	1101567	GAGATTCTGTTGAATTTTAGGAAAATGACTCGATAACTGCAACGGTGATGTCATGTGTGT	natural antisense
427	ASHGA5P046079	1.07559e-06	2.2126e-05	4.37026	uc011mfm.2	BC012753	UCSC_knowngene	1339	chrUn_gl000214	+	30380	68054	GAAACACAGTTCTGCTGCATAGTGAAAAAAGGCCAATTTAGATTCTTTTTCATAGAGAGA	intergenic
428	ASHGA5P041640	1.50394e-05	0.00016261	4.36832	uc003mvq.1	AX746991	UCSC_knowngene	2552	chr6	-	3286350	3288902	CCGAGTTCATCAGCTTCTCTTTGGACCAAAGAATTTCTCAGTAAAGGTTAAAAATAATCT	exon sense-overlapping
429	ASHGA5P047742	0.0046376	0.0156422	4.35786	ENST00000437593	RP11-500G22.2	GENCODE	951	chr10	+	123687826	123711480	ATTTTGCAACCTTACCAGAAAGCACTTAGGAAAGTGATGATTCTGATGGAGAAATAAGAA	natural antisense
430	ASHGA5P037234	2.84434e-05	0.000265333	4.35279	uc002ymc.1	AK074469	UCSC_knowngene	1428	chr21	-	27538214	27539642	CAGAAGTAGAAATCTGGCAAAAACTGGAGTACAATGATTGCTCTAGGAATAAATTCACAT	intron sense-overlapping
431	ASHGA5P022394	0.00209627	0.0082625	4.35202	ENST00000556070	AC016683.6	GENCODE	454	chr2	+	113993112	114023294	ATGGCGAAGGTGAAAGAACATCAGTGTATCAGCACAGCAAATATTCCAAATGCCAGGCTG	intronic antisense
432	ASHGA5P033292	3.15324e-05	0.00028726	4.3509	ENST00000412483	RP4-799P18.2	GENCODE	1723	chr1	-	234348351	234350834	TAAGCCAATAAGCCACTTCCTTCTTTGGAATAAGCTTACAGCAAAAGAATTACATGTTGT	intronic antisense
433	ASHGA5P017463	2.358e-10	5.5e-08	4.34653	ENST00000441971	AC002456.2	GENCODE	450	chr7	-	90219936	90225204	CCTGGACTGGGTAATTGTACATTTTTTCATCCTACATCTCAAGAGACCAAGGGACCTAAG	intronic antisense
434	ASHGA5P030360	3.86226e-06	5.7444e-05	4.34529	NR_022008	PAR5	RefSeq	3373	chr15	+	25230006	25233379	ACTTCACAGATGACTTAAAATAAATCCCCTGAAAATAAGAATCTCTGGAAGAGATGACAC	intergenic
435	ASHGA5P027910	0.000748202	0.00363544	4.339	ENST00000537346	DENND5B-AS1	GENCODE	1106	chr12	+	31744245	31768600	GAGGGCCTCTTCATGAACTCTTTCTACTCATTTGTTTTCCTATCAGTTCACCATTTCAAC	bidirectional
436	ASHGA5P014571	1.99364e-06	3.4798e-05	4.33596	ENST00000411460	LINC00113	GENCODE	524	chr21	+	29094697	29123552	ATGGATGAAGTTCCAGGGATGGAATCCGAGTGATCGCTAAGGCAATTCATATATTTTACC	intergenic
437	ASHGA5P035295	5.268e-10	8.7e-08	4.33334	ENST00000397540	AC079776.2	GENCODE	389	chr2	-	130680435	130681382	CTAATGAAGCAGAACGTGGCACCACTCCTGTCCTGGACGTTACCCACCTTCTCACTCTAG	intergenic
438	ASHGA5P019665	0.000222538	0.0013643	4.33271	NR_033890	LOC338817	RefSeq	3684	chr12	+	11700963	11717335	CTACTCTTTCACATTCAAGAAGAGTTGAATCAAGATGTTTAAGTCTCTGGAGAGTTAAGT	intergenic
439	ASHGA5P018710	8.51271e-06	0.000104833	4.30828	ENST00000456683	RP13-1039J1.3	GENCODE	476	chr2	+	111206818	111208641	GAAGCACCAGACTGAGCGTGGGAAATGATAAAGCAAACTGTGGACTTGAATGAAAGACAT	intergenic
440	ASHGA5P044264	2.46516e-08	1.272e-06	4.30629	ENST00000521558	RP11-1081M5.1	GENCODE	594	chr8	-	54307770	54308506	GAGAAATGCTCACTCTTACTTCAAGCTGCTGCATTTTGATGTTATGAAACCATAAATAAC	intergenic
441	ASHGA5P055416	0.00129809	0.00562758	4.28436	TCONS_00028698	XLOC_013788	LincRNAs identified by Cabili et al	890	chr20	-	48779906	48782702	AAGAGTAATCTTATCCCTCTGCTAGTGAGTACAAATGAAGTCTGTGGGCCAACAAGGAGC	intergenic
442	ASHGA5P042812	3.41593e-06	5.2279e-05	4.28369	TCONS_00019149	XLOC_009180	LincRNAs identified by Cabili et al	3075	chr11	+	67544665	67550430	AAATCTAGGAAATCCAGCATTGAAGGACAGGCATTGTGAATCTGTTGTGGATGGGCTGAG	intergenic
443	ASHGA5P048076	4.32973e-05	0.000367238	4.28225	BQ447661		LincRNAs identified by Khalil et al	564	chr3	-	138598328	138598892	AGTATCTGAATTTAATCCAATCGGGATCCTGCATAGAATGGGATAAGAATCCACTGATAG	intergenic
444	ASHGA5P036236	7.33984e-05	0.000567483	4.28054	TCONS_00026862	XLOC_012908	LincRNAs identified by Cabili et al	3204	chr19	+	781567	786255	TCTTCCGGAATTCTCTACAATATCTGGAAGTGACCAAGAAAATTCCAGAACCCGGAGGCT	intergenic
445	ASHGA5P031830	1.38677e-06	2.6994e-05	4.27118	ENST00000561906	RP11-481J2.2	GENCODE	644	chr16	+	58455242	58496374	ATATAGAACTAAGCCTGGTGGAGGTGTCAGAAATAGAGGTTCACTTCTGTCATCACCGAC	intergenic
446	ASHGA5P027185	5.92591e-05	0.00047441	4.26932	AI915841		LincRNAs identified by Khalil et al	514	chr8	+	17984396	17984910	GTGACTTGCTATTTTTTTAAATCTCCCTTGTAACTGTAGGATAACTCTCTGTATAACTCT	intergenic
447	ASHGA5P051092	1.71505e-06	3.1003e-05	4.26317	ENST00000458316	AL035610.1	GENCODE	1122	chr21	+	29420765	29475899	GTAAGTGAAATCAGACCTATTAATTCTGAGAGGAAGGAGGTGTCAGGATTTTCACAGAAG	intergenic
448	ASHGA5P015280	0.000378493	0.00207811	4.25515	uc003sxy.1	LOC441204	UCSC_knowngene	3214	chr7	+	26438338	26538594	GACAGAAATAACTTCTGTGCATTTCTCCAGCTACATTTAGGGAAAACTAGAAAATACAGA	intergenic
449	ASHGA5P045887	5.93386e-05	0.00047441	4.24708	ENST00000435915	RP11-217B7.2	GENCODE	469	chr9	+	107689833	107691173	GGACCCGAGAGGAACATCTTACTGCTTCTCTTCATAAATTGAGAGGAAGGAGGCCACAAA	intronic antisense
450	ASHGA5P055389	0.00252833	0.009604	4.24418	NR_027450	FAM186B	RefSeq	3106	chr12	-	49976657	49999410	CCAAGCTGTGAAGCCAAGAGGGTTGGAAGACAAATATATATGTGTGTGTATCTTTGTGTA	exon sense-overlapping
451	ASHGA5P044990	7.36144e-07	1.6394e-05	4.23082	ENST00000518865	HAS2-AS1	GENCODE	577	chr8	+	122651532	122655691	CTCGCCTCTTGTAATTCATGACCCATAAGACAAAAGTAAAATGTTCTCTGACTGCAAATG	natural antisense
452	ASHGA5P040785	0.00190937	0.00768355	4.2291	uc003lqu.3	L26953	UCSC_knowngene	5224	chr5	-	148872944	148878168	CATGAGCCACTATAATTATTGGCTCAGTTCCACCCAATTTCCATATTTTGGGTGTAATTT	exon sense-overlapping
453	ASHGA5P018674	5.38275e-06	7.3265e-05	4.22783	ENST00000456363	AC093110.3	GENCODE	602	chr2	-	54888147	54889929	AGTGCTGCAGGTTTCTGATTCCACTGACACATCTAAATATGGCAAAAGAGCAAGTGAATG	intronic antisense
454	ASHGA5P014572	0.000155783	0.00103085	4.22774	ENST00000442550	LINC00113	GENCODE	572	chr21	+	29097117	29123552	ATACAAATAAGTGCTGGATATTAGACCTTCGTCAGACACATAGACCAGTGGAACAGAATA	intergenic
455	ASHGA5P021524	4.89e-11	1.8e-08	4.22687	ENST00000534036	NAV2-AS3	GENCODE	598	chr11	-	20000244	20002883	AACTGAACATATTTTTCAGAACACACCATTTCCTAGTCCTGTCTGAGTCATCCCAGACCT	intronic antisense
456	ASHGA5P043390	3.35103e-07	9.074e-06	4.22256	ENST00000491047	RP11-61L23.2	GENCODE	571	chr7	-	143458882	143533798	GTGAAGTGGATGTACGTAGTCTTCTATGCTGACAGAATAATTCAAAAGAATGCTTTGAAG	intergenic
457	ASHGA5P015977	0.000221534	0.00136129	4.21934	ENST00000425376	LINC00113	GENCODE	509	chr21	+	29094716	29123552	AAATAAGTAGGTGCTGGATATTAGACCTTCGTCAGACACATAGACCAGTGGAACAGAATA	intergenic
458	ASHGA5P058124	3.39398e-06	5.2055e-05	4.21562	TCONS_00026697	XLOC_012798	LincRNAs identified by Cabili et al	369	chr18	-	25512852	25513932	TTTGGAAAGTCTTAAAAACCTGGCCCATAGAGAGCTTACACCTATGACCTTGGCTTCGTG	intergenic
459	ASHGA5P040412	7.53944e-07	1.6674e-05	4.21102	ENST00000512519	CTD-2127H9.1	GENCODE	837	chr5	-	38843364	38845931	GCTTAGTTTTGATAAGATTGTGTGGCCAAGGCACATATTATTCTGCTTCGTTAAACACTC	bidirectional
460	ASHGA5P015848	0.000163998	0.001074	4.19699	NR_021489	LOC338651	RefSeq	2266	chr11	+	1593970	1620414	GAACGCACGGATGGAGACAACAGGAAGGAAAGAGACCTTCCTGGTCACACTTGGGCCACA	intronic antisense
461	ASHGA5P055949	0.00304688	0.0112	4.19629	ENST00000550043	BNIP3P1	GENCODE	1585	chr14	+	28733595	28735180	CTCGGGCGCCATGTCGCAGAACGGAGCGCCCGGGATGCAGGAGGAGAGCCTGCAGGGCTC	intergenic
462	ASHGA5P015115	0.000221986	0.00136248	4.19559	ENST00000416826	RP11-125B21.2	GENCODE	3108	chr9	-	2422701	2621413	TTGCCTGTAAGTTATAGGATCCAGTTTTTTAGGTGGTAGCAACATGCTCAAGGAAGATGC	bidirectional
463	ASHGA5P020663	0.0224752	0.0557486	4.19473	NR_024360	ZFHX4-AS1	RefSeq	1724	chr8	-	77523113	77595510	GGCACTCCTCAATAGAATTCAAATGCTATTTTAAAAGAGTCCATTTCTAAGAAGATGTGG	intronic antisense
464	ASHGA5P048160	3.929e-10	7.4e-08	4.17864	TCONS_00017237	XLOC_008058	LincRNAs identified by Cabili et al	2019	chrX	+	119124752	119127773	AGAGAAAATCCAGGATTAGGTTATGAGCAGTGCTGTGCAGTTCATGTGAGTGCAGTGATG	intergenic
465	ASHGA5P021515	3.48167e-07	9.288e-06	4.17568	NR_038262	MIR210HG	RefSeq	2303	chr11	-	565656	568457	GGGGTCGCAGGGTACCAGTGTGCGGAGTTCCTGTTGCCAAGCTGAAGGTGGCCCTGGGCA	intergenic
466	ASHGA5P022052	0.000258747	0.00154081	4.17483	NR_027145	LIMS3-LOC440895	RefSeq	3219	chr2	-	111160495	111230652	TAACACTCAATTTCTAGAAAATTTCTCCACAAACTGAGAGCTCCAGAATTGATGACTCAG	exon sense-overlapping
467	ASHGA5P040645	7.02952e-05	0.000547499	4.17459	ENST00000507630	RP11-436H11.5	GENCODE	558	chr5	-	124070310	124070868	ATCTAAGGGTAGCATTAAATAAGTTACTGTGGGCATTAATGTGTACCCAAGTTTTTGTGT	intron sense-overlapping
468	ASHGA5P025537	0.000300059	0.00173149	4.17215	NR_003313	SNORD115-21	RefSeq	81	chr15	+	25451408	25477615	GTCGATGATGAGAACCTTATATTTTCTGAAGAGAGGTGATGACTTAAAAATCATGCTCAA	intergenic
469	ASHGA5P040008	0.00598495	0.019298	4.16715	uc003hpg.2	WDFY3-AS2	UCSC_knowngene	1739	chr4	+	85887970	85928168	TCTATGGCAGAAAAATGGTCAAGGAATAGGAACTACAACTTCATAAATGAGGAACCAGAA	bidirectional
470	ASHGA5P049434	3.713e-10	7.1e-08	4.16675	ENST00000416689	RP5-848E13.3	GENCODE	3075	chr1	+	43424774	43442099	AAGCAGATGGTTAAGAGCTCTACAACTTCTGTGAGGTAAAGAATATCTGCAGGGCTGGAC	natural antisense
471	ASHGA5P047584	0.00030226	0.00174023	4.16319	ENST00000439157	RP11-94M14.2	GENCODE	784	chr10	+	92214454	92290873	AATGAAAAAGTATCACAGCTGAGACAAAGCTCCTCAGCCTCAGCATGTTTGTCAGTGTGC	intergenic
472	ASHGA5P048157	8.08276e-06	0.000100336	4.15954	ENST00000543907	RP11-881M11.4	GENCODE	864	chr11	-	60685940	60692869	GATCTCATGGTCCTAAGTACTTCTTTGACACCCCATTCCCCTCAGTAAAATAGTTTGACC	intronic antisense
473	ASHGA5P020449	1.81666e-06	3.2287e-05	4.15212	NR_038402	LOC100507387	RefSeq	1005	chr5	+	175546551	175552168	TTGCCACTAACATTGATGAACCAGATGCATGTCACCAGCCCATCACGGGCACCATGGGCC	intergenic
474	ASHGA5P058053	6.56657e-05	0.000516842	4.1509	TCONS_00025791	XLOC_012065	LincRNAs identified by Cabili et al	309	chr17	+	56208	56601	CTTATGGCACCTCGATGAGGAAACGTGATTGGGCGAGTGTTTCTCACGGCACCTCGATGG	intergenic
475	ASHGA5P015722	0.000102777	0.000739573	4.1497	uc010fks.3	LOC654433	UCSC_knowngene	2227	chr2	+	113993106	114024580	ATGGCGAAGGACACATATACTCACAGAAATGAGTTATTTAAAGAAGACGGTCCAGATTCC	intronic antisense
476	ASHGA5P020282	0.000274166	0.00161142	4.14892	ENST00000510859	AC016683.6	GENCODE	2313	chr2	+	114008342	114024550	GGGGAGACCCACACATATACTCACAGAAATGAGTTATTTAAAGAAGACGGTCCAGATTCC	intronic antisense
477	ASHGA5P015215	3.76164e-06	5.6612e-05	4.14082	ENST00000417983	LINC00475	GENCODE	703	chr9	+	94903720	94910588	CCAGTGGGGTGGAAATAATGTCTGTTCTTCTGCCATGGCTGCTCAGGACCGAGGCTGAGA	intergenic
478	ASHGA5P023044	5.11715e-06	7.0791e-05	4.13004	uc010cdp.1	LOC283867	UCSC_knowngene	1505	chr16	-	65318401	65605828	AGATGGCCAGCTTTCCTTCAGAAAGAAATGCATTCAAAGAACCTACATTCACAACATAAA	intergenic
479	ASHGA5P054976	0.0101429	0.0295338	4.1271	TCONS_00010596	XLOC_004244	LincRNAs identified by Cabili et al	1189	chr5	+	1043854	1046279	GAGAGTGTGTGAGGGTGTGTGAATGAGGGGGTTAGTGTGAACGAGTGGGCGAGTTTGTGA	intergenic
480	ASHGA5P020319	3.7254e-05	0.00032852	4.11976	ENST00000511495	CTC-281B15.1	GENCODE	585	chr5	-	80505919	80597316	GCCATAACTGCCACATAATATTACCTTTGGCTGATGATCTATTCTGTAGGAAGTCTGCTG	intronic antisense
481	ASHGA5P037035	0.000112028	0.000788603	4.11844	ENST00000450129	RP4-550H1.4	GENCODE	357	chr20	+	34660599	34673182	CCTATCCAAGACACAACATTTCCAGTGGCAGAGATAAAAAAGTAAGATTTCAGACTCAAA	intergenic
482	ASHGA5P042668	0.000849214	0.00399452	4.11816	ENST00000454411	RP1-67K17.4	GENCODE	444	chr6	+	143109259	143115223	AACTGTCTACTTAAAATGAAGTGATATGGGAGAAATTTATCTGGACTCAAAATCAGGAAG	intronic antisense
483	ASHGA5P046198	0.000755698	0.00365504	4.11307	ENST00000412242	KDM5C-IT1	GENCODE	755	chrX	-	53241589	53243861	GGCTAAATTGTGTGTTAGAAACTCTGAGATATAGAAGTTCAGAGGAGAGGAAAATAGCTA	intron sense-overlapping
484	ASHGA5P036070	1.84527e-07	5.86e-06	4.1058	ENST00000458252	AC123886.2	GENCODE	747	chr2	+	111368492	111369981	CAGGTGGACATGAGAACTGTTGGTCTTTGGTACATATGTGTTGCAATGAGTAAGGATGAG	intergenic
485	ASHGA5P045815	1.97019e-06	3.4532e-05	4.10189	ENST00000423719	LINC00484	GENCODE	2745	chr9	+	93922050	93927858	ATGGGCCATGATTTACCTGAATTCTCACAGTGGCTTAGACAATGGAGACCTTGTCCACAA	intergenic
486	ASHGA5P048112	9.23338e-06	0.000111646	4.09668	ENST00000528885	RP11-624G17.3	GENCODE	684	chr11	-	57243965	57245007	TAAAAAGTGTCCAGGGTAGACTTAGGAGAAAAGTATTCCTCCAGTGTCAGGAGGTTGAGG	natural antisense
487	ASHGA5P037427	1.05052e-05	0.000122806	4.09407	uc002ymk.1	AX747935	UCSC_knowngene	1752	chr21	+	29420732	29509928	CCTATGGTTGATTGTGTGCCTCTAGAAGAACTTCAAAAGTACAATATAAATCTTGCTAAC	intergenic
488	ASHGA5P041533	1.60497e-05	0.000170765	4.08259	TCONS_00020499	XLOC_009820	LincRNAs identified by Cabili et al	596	chr12	+	85763588	85818671	AAACCCATAGCTAGTCTGATTGCTTGCATGCTATTCATATACACGCCCGTTGTAAGCTGG	intergenic
489	ASHGA5P039125	4.62541e-08	2.101e-06	4.07133	ENST00000472924	KRT8P12	pseudogene	1397	chr3	+	160285639	160287036	TCAAGAAGGATGTGGATGAAACTTACATGAACAACGTAGAGCTGGAGTCTCACCTGGAAG
490	ASHGA5P019223	3.39574e-06	5.2055e-05	4.06615	ENST00000473958	RP11-475N22.4	GENCODE	722	chr3	+	128208099	128208929	AGGCCGGGCAGCTTACGATTCTTCATCAACTCGTAAAATGAGATCGCCGCGGAGCTCGAG	intronic antisense
491	ASHGA5P044373	4.23506e-07	1.0721e-05	4.05838	ENST00000524052	RP11-317J10.2	GENCODE	430	chr8	-	86368851	86375283	TTTTTACCATTTCACACAAACTTTTAAAGATTATTCCACGCCGTTAGCTCTGTGCTTCTA	bidirectional
492	ASHGA5P016846	0.0111623	0.0318042	4.05779	ENST00000434944	LINC00475	GENCODE	796	chr9	+	94914875	94920770	CTCATGCCAAATTCCATGTCAGTAGTGGCAAACCTTTACAGGATTATGAATACAAAATGC	intergenic
493	ASHGA5P027692	2.00178e-07	6.248e-06	4.05746	uc001uhw.3	AK001057	UCSC_knowngene	1320	chr12	-	129297748	129299068	TGGCATTCAGACACATAATTCAAAACTGCAAATGGTGGGACCGCACTAAAGAATTTTTAG	intron sense-overlapping
494	ASHGA5P011438	0.000212099	0.00131364	4.05528	ENST00000371455	RP11-725K16.4	GENCODE	546	chr11	+	102617698	102702242	ATTTTGGGATAACCTGCATCCACGGACTGCATATTTTCATCATACCTGAGTCGCTGGGAA	intronic antisense
495	ASHGA5P016773	0.000353731	0.00196955	4.0549	NR_033815	ALS2CL	RefSeq	5224	chr3	-	46710484	46735194	AAGGCAGCATGTGTGGCTACGGCATCTGTACAGCACCGACGAGGTGTACAAGGGCTACTT	exon sense-overlapping
496	ASHGA5P038052	7.8523e-06	9.7937e-05	4.05023	TCONS_00024285	XLOC_011677	LincRNAs identified by Cabili et al	5246	chr16	+	24715880	24721546	ACTCGGCTATTCCACTTCGATGATTCTCTGTCACAGGTGTCTTAAATACATGAACAAAGG	intergenic
497	ASHGA5P041031	0.00389144	0.0136615	4.04983	NR_038848	LOC643401	RefSeq	1120	chr5	+	27472398	27496508	AATAATATTTATGTCATACCTTATGAAGTTAAAATAAAATATAACGAATGAGGGGCTTAA	intergenic
498	ASHGA5P006417	0.000481679	0.00253482	4.04477	NR_015359	WDFY3-AS2	RefSeq	1569	chr4	+	85887970	85928168	AATATAGTCTAAGGACACAGCAAGAGGCAACATTTTGGAAGCAGAGGGCAACTCTCACTG	bidirectional
499	ASHGA5P042664	2.963e-06	4.6993e-05	4.04453	AI571863		LincRNAs identified by Khalil et al	369	chr15	-	75757448	75757817	GCAAGTCAGGGTTCTCATACAGGAGACTTAGTGAACAAAGCAAGAGAAAATGCTCAGGGT	intergenic
500	ASHGA5P017846	7.78729e-06	9.7318e-05	4.04187	ENST00000446355	AC002066.1	GENCODE	516	chr7	-	115878311	116139519	TGCGAAGCAGGGCCTCTACTTGGCCGACGCAGCTAGAAGACTAAGGTCAGGGGCATTCTG	intronic antisense
501	ASHGA5P036552	0.00521529	0.017197	4.04045	ENST00000413353	AC019068.2	GENCODE	489	chr2	+	237299716	237301031	CCAAGACTCATCTTTTTTCATCCAGATTTCTACACTCCAGAAGGGTAAAGAAAAAGAAAA	natural antisense
502	ASHGA5P035461	0.0109124	0.0312361	4.03284	uc021vtc.1	DKFZp451N061	UCSC_knowngene	6735	chr2	-	179607320	179614055	CTGTTATGCACTGCTTTGTTTCTTGCTCAGTGGTTCTGTATAGGTTTTCTTATACAATAA	exon sense-overlapping
503	ASHGA5P033477	0.00149278	0.00629711	4.01278	NR_015407	LOC339535	RefSeq	1540	chr1	-	238643683	238649317	CTTCTTCATATTTAGTACTTTTACAATTTTAACAGTAAAATTAGTTTCATGTTTTATAGC	intergenic
504	ASHGA5P046457	9.957e-09	6.61e-07	4.00671	ENST00000433228	RP1-60N8.1	GENCODE	1554	chrX	+	17546557	17605281	GGACAATGCTGATTTAGTAAGTTGGGGTTTCTAGGAGAAGATAGAAATACATTGACATAT	intron sense-overlapping
505	ASHGA5P037503	7.16386e-06	9.1328e-05	3.99912	ENST00000448927	AP001062.7	GENCODE	4354	chr21	+	45751116	45755734	ATACACCCCAACTGCCTGAAAGTCCAGTAACATTTGTTCATTCAAGCTTCCCTTAGTCTG	natural antisense
506	ASHGA5P018726	0.000747804	0.0036349	3.99867	ENST00000456932	CSPG4P5	GENCODE	8555	chr15	-	84953013	84966399	ACCTCTGTGTGGCCATTCTCTTTGGCCACAATGGCAGCCTCAGCTCCCGCAACACCCTGG	intergenic
507	ASHGA5P038625	5.41611e-05	0.000441471	3.99862	ENST00000432154	RP11-407B7.1	GENCODE	2666	chr3	-	193766708	193787318	CCGCGTTCAAAGTTAAAAACTGTCACCTGAATAGTTAATAACATCAAAGATTGTGAAAGC	intergenic
508	ASHGA5P022854	7.8789e-09	5.74e-07	3.99692	ENST00000564109	CTD-2311M21.2	GENCODE	915	chr15	+	74643108	74654244	TTTGGCCAGCCAGCCAGGAGGAAGAGGGACACGCATGAAATTTGGTGCCATGACTCGGAT	intronic antisense
509	ASHGA5P036422	1.24951e-06	2.4868e-05	3.98864	ENST00000412951	AC012462.1	GENCODE	131	chr2	+	216300975	216301715	CCTGGGGATGGGACGCCCGTTTCCACTGAAAGTGAAATCACTGTGAACAACCTGAAAATT	bidirectional
510	ASHGA5P040937	0.00306924	0.0112767	3.98601	ENST00000563761	CTD-2083E4.7	GENCODE	564	chr5	+	195892	196456	AATGGCTGAGCACTAGAATAACTAAATGCAAATAAAATGCGTCTTTCAGTGCAGTTCAGA	intergenic
511	ASHGA5P035634	5.138e-06	7.1002e-05	3.98371	ENST00000447880	AC016999.2	GENCODE	452	chr2	-	239335717	239336370	AATCTGTATCGGCTAACGGGAAGGAAGTTACGAGCAAGTTCCACCGGAAAGAAAATCTAG	natural antisense
512	ASHGA5P042556	3.19211e-06	4.9938e-05	3.96736	NR_037157	BVES-AS1	RefSeq	1725	chr6	+	105585561	105617819	GCAATATCCAGCTGTCATCTTCTTGATCCTCATATGCTACTACTAGCATCTAGCATTTAC	intronic antisense
513	ASHGA5P014682	3.43638e-05	0.000307527	3.96468	ENST00000412422	RP4-562J12.2	GENCODE	2290	chrX	+	117973518	117991849	TTTTCCTGGGCTATACCATCTGGAACAGATGACTTCCAAGGACACCGTAGCAAAGAAAAA	intergenic
514	ASHGA5P037171	9.3377e-09	6.35e-07	3.9623	NR_024389	FLJ16779	RefSeq	7650	chr20	+	61885329	61892967	TCTCATTTGGGACCTCATCTTTAATCTCAGCAACTCAGGGATCAAAGAGAAAAGGCCGAG	natural antisense
515	ASHGA5P037418	0.00109495	0.00490465	3.95827	ENST00000455275	AP001439.2	GENCODE	392	chr21	+	27530408	27548142	GTTGAAGCTTTGCATAATAAAATTCTTTTCCCCAGTGATGGGCAGTTTTTCACATAGTAA	intronic antisense
516	ASHGA5P046603	1.46777e-07	5e-06	3.95596	ENST00000568809	RP11-524D16__A.3	GENCODE	652	chrX	+	99928326	99928978	ACACACATACCATTCTCACAGGAGGCCACATGGTGCAGTAGAGTCAGACTTTGATTCAAA	intergenic
517	ASHGA5P027530	0.000655163	0.00327117	3.95318	TCONS_00012113	XLOC_005647	LincRNAs identified by Cabili et al	1772	chr6	-	25997714	26006496	GAACCAATACAACATCTTGAGCATAAAACCAACTGATACAATGATGTACAAGTCAGATGA	intergenic
518	ASHGA5P027802	0.000811715	0.0038539	3.94845	ENST00000399866	RP11-266K4.9	GENCODE	517	chr12	+	8388477	8390769	ACGGCTTCTCGACATCCTCCTGTCAAACCCTGCATGTTCAGGCCCATCTTTAAAATCCAT	intergenic
519	ASHGA5P028372	0.00120715	0.0053019	3.94411	ENST00000536639	RP4-809F18.1	GENCODE	1310	chr12	+	126843847	126845611	ATTGGCTCAGATAACATTCTGTTTCTGGAAGTCACAAAGAGTGGAAATTGGAATATGTAA	intergenic
520	ASHGA5P046684	3.7373e-09	3.34e-07	3.94291	uc004fbf.1	AK054921	UCSC_knowngene	3294	chrX	+	139863223	139866517	ACGTCTTCCAACAAAGGTATGTCTTCCAACAAAGGTACGTCTTCCAGAAAATCCACGTCT	natural antisense
521	ASHGA5P044090	1.79479e-06	3.1943e-05	3.93785	uc022aqz.1	FLJ00326	UCSC_knowngene	5748	chr8	-	7118140	7128636	TGTTTCGGAGACGTAACGATTTGGATTGCCAACAAGTCAAGAAATGTTCAAGCCCTTGGA	intergenic
522	ASHGA5P019257	3.33452e-06	5.1468e-05	3.93701	ENST00000475455	TFP1	pseudogene	1573	chr3	+	133407035	133431646	CTACAGTAAGGCTATTATGTCATGGCTGTGGTTAAGAAATCAGATGCTGATGTCACCTGG
523	ASHGA5P030947	0.0020095	0.00799259	3.92294	ENST00000566787	RP11-27M24.3	GENCODE	502	chr16	-	10608698	10622059	CGGCATAAAGTAGAACATTCTTACAAGAAATAAATATTTCGTAGTCATGGAGAAGAACGC	intergenic
524	ASHGA5P043825	3.32769e-06	5.1425e-05	3.92115	uc003uxs.3	BC005927	UCSC_knowngene	817	chr7	+	100770384	100771201	CCCACCTCATGCCTGCTAACTTGAATGAAACAATCGCTGGGAAAGCATTAAGAGAATTAA	exon sense-overlapping
525	ASHGA5P036095	9.86139e-07	2.0758e-05	3.90793	TCONS_00027712	XLOC_013275	LincRNAs identified by Cabili et al	366	chr19	-	23487808	23493434	GTCACTTCTTCAGTCAACCAAACCAATTACAAAATTGTGTTCCAATGTCACATGTTCAAA	intergenic
526	ASHGA5P036423	0.000357242	0.00198464	3.90653	ENST00000447835	AC012462.2	GENCODE	825	chr2	+	216318429	216328594	GGCCTTTGTGACCTGTTGAAAGAATATACATGGATTTACTTCAGGAGAAAAATAAAGTGT	intergenic
527	ASHGA5P033534	3.55147e-05	0.000316263	3.89531	ENST00000579247	RP11-699A5.2	GENCODE	428	chr18	-	18820635	18821332	ATTCTGGGTCATGCACACAATACAGGTTTAGTAAATAAAATCCGTATGTTTTTGGCCCCA	bidirectional
528	ASHGA5P031800	0.000401078	0.00217757	3.8949	uc002ejp.1	MT1JP	UCSC_knowngene	977	chr16	+	56669674	56670998	GGAGACTCATTGACCCACTGCTGTACCTTCTTCATCTCACTCACTGCCAACTGCGTTTTC	intergenic
529	ASHGA5P027770	0.00196473	0.00785382	3.88501	TCONS_00010144	XLOC_004611	LincRNAs identified by Cabili et al	1464	chr5	+	154258473	154263999	GGCCTAGGAATGGATGTCACTGGAAAAGACCCCATAGGCTCCTCTAAAATATCTTTCATT	intergenic
530	ASHGA5P032809	0.00321179	0.0116987	3.8763	TCONS_00029013	XLOC_013936	LincRNAs identified by Cabili et al	815	chr21	+	38666995	38668774	AGAATATCACGTTTTTCTGAAGTTTAAAAGCTACAGCCCAGTACTCTGAACCCAAGAATT	intergenic
531	ASHGA5P023157	0.0306834	0.0717115	3.87218	ENST00000571639	RP11-65J21.3	GENCODE	305	chr16	+	14396361	14420142	GGCAGCGGCGATAAACCTGCCAGTAATTTCAGCAAATGAAACGTGGAACACGTCAAGGCC	intergenic
532	ASHGA5P016427	2.28012e-06	3.8713e-05	3.86318	ENST00000430271	RP11-3N2.1	GENCODE	748	chr7	+	63539166	63545179	TAGTATAAAGGTTATTATGATGTTTGTAATGAAGATGAGTATAATGGAGCTATATGTTTC	intergenic
533	ASHGA5P016476	7.63359e-05	0.000585164	3.85279	uc004eqg.1	LOC642776	UCSC_knowngene	2079	chrX	-	115033603	115085422	AGCCTCAGCTAGGGCACACAGAGTGAACAGAAAAAGAGGATACCTCTGCGATCCCGGGTC	intergenic
534	ASHGA5P029632	2.18012e-05	0.000216339	3.84327	ENST00000553791	RP11-718G2.5	GENCODE	448	chr14	+	70742012	70758576	AATCTGGAATATTTCAAGATAAGGTCCAATTCTTCCATTGTCTCGTAATCCAATGCAGAG	intergenic
535	ASHGA5P054815	4.20721e-05	0.00035959	3.82746	ENST00000524565	RP11-430H10.1	GENCODE	872	chr11	+	45377051	45378199	TTTTTTTCAGGGTGCAGCAGAAGTCTCAGGTAGCTGAGAAGTTCATGGAATCTTCTTATT	intergenic
536	ASHGA5P019248	0.00322322	0.0117336	3.81865	NR_048567	PPP1R1C	RefSeq	1102	chr2	+	182818967	182982483	CTTTTGAAAGACATCTAAAAAGAAATAGATGACAAGAGGGGGCCCAACACACAAGGGGAA	exon sense-overlapping
537	ASHGA5P040801	3.794e-06	5.6695e-05	3.81222	ENST00000520773	ZNF300P1	GENCODE	3115	chr5	-	150310206	150324621	AAAGGACTAAAGGTGGATACCTCCTTCACATGGTGTTTGCTATAAGGGTCAAACGACCTT	intergenic
538	ASHGA5P042228	2.44642e-05	0.000237192	3.80376	uc010jns.2	KU-MEL-3	UCSC_knowngene	1143	chr6	+	4610845	4612153	AGTGTCTGGTGTTTTCTTGAAGGCCTGTGCTAAATAAAGTGGATTGTTTATAAAGTGGGA	intergenic
539	ASHGA5P048775	6.59662e-08	2.697e-06	3.79941	ENST00000561834	CTD-2524L6.3	GENCODE	546	chr15	+	72110830	72115725	TGGAGAAAACAACGCTACTGTTATGAAACACAGAATGGAGTCTTCATTAATCTTCCAGCA	natural antisense
540	ASHGA5P047771	3.15135e-05	0.00028726	3.79851	TCONS_00013637	XLOC_006299	LincRNAs identified by Cabili et al	422	chr7	+	153445241	153446094	AACTTCCTCTGGACATGAATCAAACCGCAGGAGTCTCCAATAGCGTCAGGTGTCCCCCGG	intergenic
541	ASHGA5P045985	3.81845e-05	0.000335093	3.78171	TCONS_00001584	XLOC_000917	LincRNAs identified by Cabili et al	2055	chr1	-	92010898	92035089	TTAATGTTTAATTCCTTCTCACTGAATCCCCATGGAAGGGGGCAAAAAGCAAGTGCTACT	intergenic
542	ASHGA5P022793	6.01608e-08	2.512e-06	3.77789	ENST00000562920	RP11-23P13.6	GENCODE	400	chr15	+	42187382	42188141	GTGTGATGTTCTCAACGGCAGCTAAAGCCACTGCATACAATGCAAGGACTGGCTCCTGTT	intergenic
543	ASHGA5P017316	0.00131092	0.00567349	3.77533	ENST00000440093	AC005152.2	GENCODE	468	chr17	-	70067183	70115589	CGACATTTCTTATAGGAAATGGAACTCTTCATAAGTCTGGCCATGGAGGCATGGTATCCG	intergenic
544	ASHGA5P043490	0.000162217	0.0010673	3.77312	ENST00000455866	AC092171.2	GENCODE	753	chr7	+	5459476	5462753	CCCCTCTTAAATGGAGTTAAAATGGCTGAATTCCGGCTTTTAATTAAAAACAGCCTATAA	intronic antisense
545	ASHGA5P045065	0.038997	0.0866966	3.76606	ENST00000569285	RP13-467H17.1	GENCODE	3377	chr8	+	143485012	143488389	CAGCCTCCCAAGGTGTTTAACATGGAGCAGGAGTGACAAAAAGAAAAATGAAGTAAAAGA	bidirectional
546	ASHGA5P055333	0.000106634	0.000760845	3.76559	uc001rie.1	AK000807	UCSC_knowngene	446	chr12	+	27809602	27810048	GTTGATAGAGGTAAGAAGATATATTTCACATTTATCATCTCATTTTGTTAAAGTCCTCCA	exon sense-overlapping
547	ASHGA5P036068	1.34745e-05	0.000148866	3.7649	ENST00000564038	RP11-1223D19.1	GENCODE	744	chr2	+	111003227	111024093	TTGATGAAACAACAACACTTCCATACAGTGAACGCCATAAGCACAACTGCAAGCAAACCC	intergenic
548	ASHGA5P045692	9.2575e-09	6.34e-07	3.74909	ENST00000434627	RP11-195F19.9	GENCODE	665	chr9	+	34665661	34681295	GGTATTACTACTACTCAGCAAGATTCTGGTTTTACTTCTCATCTTGGGAGTTACCATCAA	natural antisense
549	ASHGA5P030370	0.000547894	0.00282003	3.74902	NR_022009	PAR1	RefSeq	2412	chr15	+	25380788	25383200	AATGGTTACAGTCTACTTCTGTGTGTAGTCTCCAAACACTCAGAAACCTCAAAATTTAAA	intergenic
550	ASHGA5P046288	3.99324e-05	0.000346591	3.74578	ENST00000430756	RP11-761E20.1	GENCODE	2445	chrX	-	115032518	115085422	TGAACAGAAAAAGAGGATACCTCTGCGATCCCGGGTCATCTCCAGATGCTAGGGTTATGG	intergenic
551	ASHGA5P052420	8.69414e-05	0.00064731	3.7433	ENST00000521133	CTB-131B5.4	GENCODE	454	chr5	-	139485009	139488173	TAATTTTATGTATTTATAGTAGTTCTCCCTGTGTCCCTTTATCCAAGCAACACAATACAA	intergenic
552	ASHGA5P037956	0.00180242	0.00732763	3.73892	ENST00000434741	RP1-302D9.3	GENCODE	567	chr22	+	33560048	33562425	GAAATGTCAAGGTTCTGCAATTCTCATAGATTCCCAGGAGCTCGAAGTTCCCAAGTACGT	natural antisense
553	ASHGA5P017037	6.02187e-06	7.9738e-05	3.73603	ENST00000436942	RP11-462G8.3	GENCODE	472	chr10	+	132893480	132894040	CCAGTCCCCGGCTGCTCAGGACCGAGGCTGAGACGGGCGACCAGGACGGGACTGTATGGC	intronic antisense
554	ASHGA5P047683	4.08197e-06	5.98e-05	3.72364	uc001kyd.1	AK094859	UCSC_knowngene	2743	chr10	+	106061961	106064704	CCCAAGGCCAAGTTTAATACTGTGCATTCTGAAATCTTGCAATGTTGATGATGTAAAATA	intergenic
555	ASHGA5P042554	1.64727e-06	3.0035e-05	3.71296	TCONS_00021307	XLOC_010061	LincRNAs identified by Cabili et al	282	chr12	-	46824118	46888235	CCTACTGACACTGCATTTACAATGACAAGTTCTATGTCTGCAACGTAAAAGGCAAGAAGA	intergenic
556	ASHGA5P000066	0.00304748	0.0112	3.71262	AL049990		NRED	1719	chr4	-	121952575	121954272	GTCTTTCTTGTAAATACCTGCCAAGATTAATACCCAATCAAATGCCATGACTTGGAAATA	intergenic
557	ASHGA5P040153	5.80558e-06	7.7522e-05	3.71173	ENST00000506982	RP11-673E1.4	GENCODE	832	chr4	+	144874787	145047512	TTGCCACTTATGTTCTTAGAAATACTTGCTTTAATTCACCAGAATCAGTTGCTCTGATAC	intronic antisense
558	ASHGA5P040673	1.92968e-05	0.00019736	3.70931	ENST00000457998	AC034220.3	GENCODE	1779	chr5	-	131699913	131705340	ATGTGAAACCCCACAATTCGGCTTCAAGAGGTACAGGACAGTTTTTGAATTCCACAGAAA	bidirectional
559	ASHGA5P029872	5.93071e-07	1.418e-05	3.69685	ENST00000546615	RP11-701H24.3	GENCODE	427	chr15	-	25272882	25277194	TAAAAATTCGACCTTTTGTACATTCTATCTTGCTTTACTCCCTCGATTCCTAGCACCATC	intergenic
560	ASHGA5P030757	0.000154296	0.00102369	3.69563	uc021suk.1	AK054837	UCSC_knowngene	1692	chr15	+	91504656	91506348	GAGGGAAAGCAGCAGCAAGACCCAGTGGAGACGATGGCAAAGGGGCTGATTTCACTTTAG	exon sense-overlapping
561	ASHGA5P019214	0.000701565	0.00345654	3.69471	NR_046702	PRICKLE2-AS3	RefSeq	3101	chr3	+	64173219	64187236	CAAATGGCTGGATACATTAAGTGAGAAGCAACTTGTAAAGCACCCAGGAAAATATCTGAC	natural antisense
562	ASHGA5P038843	7.12862e-06	9.1062e-05	3.69181	TCONS_00023310	XLOC_011179	LincRNAs identified by Cabili et al	1281	chr15	+	24641973	24643464	TGTAATCTAGCACTCCCTGCAAGCAAGTTGATGTTGTTAATTTAATCACACTACCTGAAC	intergenic
563	ASHGA5P026004	0.000787431	0.00377546	3.68919	NR_052015	RUSC2	RefSeq	4997	chr9	+	35490006	35561895	CCCACTTCGTGGGGTGGCACCGAGAGCCGACCAGTCCTTCGCTACAGCAAGGAACAGAGG	exon sense-overlapping
564	ASHGA5P043658	0.0282073	0.0670248	3.68875	ENST00000541385	LINC00525	GENCODE	1173	chr7	+	47802946	47806369	TATAAACAACACTGCAATTTGTCTCCTTGCACCGTACATCCACGAAGCAGATTTGCTTCT	intergenic
565	ASHGA5P012969	0.0464522	0.099606	3.6873	NR_037951	C1QTNF3-AMACR	RefSeq	3612	chr5	-	33987090	34124633	TTCTCCACCTTTGCAGGATTCCTGCTCTTTGAAACTAAGTGTCATGGAGAAACTCCAGCT	exon sense-overlapping
566	ASHGA5P042658	6.89633e-05	0.000539128	3.68558	ENST00000428044	RP11-390P2.4	GENCODE	421	chr6	+	139015455	139018164	CGCCTCATTTTTTACAATGTGGGCCAGTAACTATTTCGTATCACCTACTCTGACCACCTT	intergenic
567	ASHGA5P044610	2.32287e-05	0.000227648	3.68547	ENST00000525376	AF186192.1	GENCODE	572	chr8	-	145923998	145924570	GGTTCCTAGCAAAATACTAAAGCTGAGCCAAAGTAGAAAACTTGAATTAACTAATTGCCA	intergenic
568	ASHGA5P043819	5.32196e-06	7.2827e-05	3.67825	NR_038425	LEMD1-AS1	RefSeq	2781	chr1	+	205342379	205356568	GACATTGTCATTTTCAAAAATGGAGTAATTATGGCCTATCTACCTGACTGTGCAGCTATC	intronic antisense
569	ASHGA5P031128	1.1077e-06	2.2603e-05	3.67183	ENST00000568752	RP11-989E6.10	GENCODE	3971	chr16	-	33344308	33348279	GTGCTTGTTATTAGTTGTATTACATGTAGGTCATGGTTTTGTACACATAACTCCAAACCA	intergenic
570	ASHGA5P014921	3.78809e-06	5.6695e-05	3.66003	ENST00000414768	RP11-305L7.6	GENCODE	562	chr9	+	93932953	93944999	AATAGGAAAGGCGATTACTTTAAAACATGAAAGAAATTGCACCTTTTCCTTAAGGGCAAG	intergenic
571	ASHGA5P045214	0.000110767	0.000782845	3.65786	ENST00000426358	RP11-465M18.1	GENCODE	947	chr9	-	37073527	37075789	GCTGCATATCAAAACTGAACTTTAGCATGGAGTCTATGATGACTGGCTCATGTCTCTCCA	intergenic
572	ASHGA5P039311	0.00534621	0.0175602	3.65492	ENST00000511928	AC141928.1	GENCODE	4525	chr4	-	3760474	3765117	GAGACTGATGCTACATTTCTCTTTATCTATCCCTGTATTGTTTAATTTGTTCCAAGTGCT	intergenic
573	ASHGA5P023009	0.0070296	0.0220443	3.64155	ENST00000567647	PWRN1	GENCODE	561	chr15	+	24803318	24819674	CTTACTTCCGAGAAGATCGTAGCAGTAATTCAGAATCTCATCCAGGATACCTCATCACAG	intergenic
574	ASHGA5P022817	3.71309e-05	0.000328348	3.63822	ENST00000563256	RP13-98N21.3	GENCODE	573	chr15	+	82591000	82598152	TTGTGCTCCTGGTCCTTCTGGAAGATGAGGAGGAAGGACCTGTGTGCAGCCATGAACTGG	intergenic
575	ASHGA5P051455	8.44636e-08	3.229e-06	3.63749	NR_024071	PLCD1	RefSeq	3053	chr3	-	38048986	38066278	ATCCTCTTCTGCGATGTGCTCAGGGCCATCCGGGACTATGCCTTCAAGGTGGGAGTGCCC	exon sense-overlapping
576	ASHGA5P035766	8.84602e-06	0.000107993	3.63638	ENST00000411862	AGBL5-IT1	GENCODE	339	chr2	+	27283905	27284683	TACAAAGGGAAATAGTAAAGAGCTTTTTCTAGGTTGTCACTGGAATATTCTAGGCCCCTC	intron sense-overlapping
577	ASHGA5P044288	0.000236122	0.0014337	3.62957	ENST00000506428	RP11-163N6.2	GENCODE	2444	chr8	-	61315770	61326377	CCACGTGGAAATGGATTACAGATTATTCTAATTGGACACTCTAAACGTGCAATTTAACCA	intergenic
578	ASHGA5P019993	0.000163871	0.00107372	3.62864	ENST00000506448	FAM86HP	GENCODE	464	chr3	-	129821606	129822957	ATGTTGTCATTACAGCAGTAACCTGAAGCTTTCACCGTAGACGTGCTGTATTGCCCAGAA	intergenic
579	ASHGA5P014065	0.00915612	0.0272234	3.62838	ENST00000399247	HLA-F-AS1	GENCODE	1905	chr6	-	29694377	29716826	ACATATCATCACTTCTGCATGCAGTCTCATGGGAAGATGGTGCCAAGAACGAAGAAGGAA	natural antisense
580	ASHGA5P039722	1.52264e-07	5.146e-06	3.62754	NR_024008	WWC2-AS2	RefSeq	2179	chr4	-	184018173	184020352	GCACCAAACCAAACCATTCTTATTTAAACCTTGCTTCCTAGCTTATTTATTTCCCAAACA	bidirectional
581	ASHGA5P048137	1.12206e-05	0.000128195	3.62649	ENST00000525714	RP11-142C4.6	GENCODE	894	chr11	-	58725689	58746758	TTGTAGTTGTGTTGTGAGGAAGATTCATGACTTATCTTGTGGGAGAATTCTGTATTTAGC	intergenic
582	ASHGA5P052469	0.0010591	0.00477105	3.62459	TCONS_00012530	XLOC_005361	LincRNAs identified by Cabili et al	509	chr6	+	80247284	80251481	TGTAGCGGAGACCCCCAAGTAGGGAAATTGGGGCAAAACGCGGAGCGCTCCAGGCTCCTA	intergenic
583	ASHGA5P018998	1.63384e-05	0.000172822	3.62365	NR_073009	FGFR2	RefSeq	4457	chr10	-	123237843	123357972	AAACAGCAAGGCCGCCGGTGTTAACACCACGGACAAAGAGATTGAGGTTCTCTATATTCG	exon sense-overlapping
584	ASHGA5P042218	4.15031e-08	1.934e-06	3.62323	uc011dhu.1	TUBB2A	UCSC_knowngene	1052	chr6	+	3224985	3226037	TGAAGGTGTTCATGATGCGGTCTGGGTACTCTTCCCGGATCTTGCTGATGAGCAGGGTGC	natural antisense
585	ASHGA5P022832	0.000169666	0.00110088	3.6205	ENST00000563709	CTD-2524L6.2	GENCODE	391	chr15	+	72109800	72110589	GTGTGTGTACCCAGCAGAAATGCCCACCGAAAGATATTACCTCAATAAAAAAGTAAAAAA	exon sense-overlapping
586	ASHGA5P020484	0.00104257	0.004715	3.61839	ENST00000514487	CTC-338M12.5	GENCODE	289	chr5	+	180618923	180621429	AGCTGTCGGGGCGGGGCGGCACCGCCGAGCTCCGAGCTTTCCAGAAGCAAAAACAAAAAA	natural antisense
587	ASHGA5P043588	1.91818e-08	1.063e-06	3.6174	NR_034097	JAZF1-AS1	RefSeq	1194	chr7	+	28220075	28280996	ATGGAAGACTGACTCTGCACCATGCTCTGTGACAAAAGGCTTCAAGATTAAACCGGTTTG	natural antisense
588	ASHGA5P041650	0.00124261	0.00542604	3.61574	ENST00000436283	RP3-430A16.1	GENCODE	369	chr6	-	4774759	4775642	CATTATCAAATGTTTGCACAAGAATCGCAAATTAAAGCCACCACTTCATCAACTGGTCAA	intronic antisense
589	ASHGA5P021709	1.01159e-06	2.1084e-05	3.6092	ENST00000538810	RP11-84E24.3	GENCODE	519	chr17	+	70026794	70034889	GCCCTCAAAGCCTCTCTCAATTGCCTTCTCAGCTTGTATGCTTTGAAGAAGCAAGCTGCA	intergenic
590	ASHGA5P038867	2.86003e-05	0.000266096	3.60638	uc003dnc.3	AL832184	UCSC_knowngene	2286	chr3	+	67705120	67998136	TATCTGACTATTATGTTAATATCCATGTGACAGTAATAAAGAAATCATCTATTGGAGATA	bidirectional
591	ASHGA5P030401	0.00110157	0.00492732	3.60595	ENST00000557989	RP11-680F8.3	GENCODE	1451	chr15	+	30114833	30116284	AGAGCCTTCTGCAAACCAAACCCTTATTCCTTTTTGTTCTTCATAAAAATGGTTGAAGTC	intronic antisense
592	ASHGA5P037031	7.71418e-05	0.000589235	3.60244	ENST00000429167	FAM83C-AS1	GENCODE	352	chr20	+	33873053	33873559	CTCCTCAAAGTTCAGGATACACCAGGCGCTGTGATTCACAATAAAGTCTGCCTTTATTGA	natural antisense
593	ASHGA5P018511	0.000678557	0.00336675	3.59756	ENST00000454416	AC017104.6	GENCODE	466	chr2	+	232258492	232259702	CGGGTGAGAGGATTAAGTGAGCCAGTCATGCATGGGCCGAGAACCAGGTTTGGCATATTG	intergenic
594	ASHGA5P047010	1.58e-10	4.4e-08	3.59405	uc001kkg.1	BC043227	UCSC_knowngene	2194	chr10	-	96986468	96990901	ACTCCACGAGAGATACTCAAAGAGGCATTTAAAGAGTTAACAAGGATACTCATTGAAGAA	intronic antisense
595	ASHGA5P026193	3.8075e-08	1.807e-06	3.59364	ENST00000532930	RP11-318C2.1	GENCODE	850	chr11	+	8790324	8807318	CCCTCATACACATTCAGAAGGCCAAGGAAACACCCTCAGGATTGAACTATGATAAAGAAG	intronic antisense
596	ASHGA5P030362	3.64192e-07	9.675e-06	3.59363	uc010ayj.2	HBT8	UCSC_knowngene	4102	chr15	+	25277533	25281635	AATCCAACAACTTTAGCAGTTTGTTTACCAGTTATTGAGTACCAACTGTGTTCAACATTG	intergenic
597	ASHGA5P056933	5.92652e-06	7.864e-05	3.58824	TCONS_00010707	XLOC_004412	LincRNAs identified by Cabili et al	376	chr5	+	67483760	67501722	CACAAGAAAATTTGGGGTTTTCAGGGCTGTGGTTGTGAAGAAGATCAAGACCCATGATGG	intron sense-overlapping
598	ASHGA5P057429	1.82603e-05	0.000189048	3.58796	TCONS_00017250	XLOC_008072	LincRNAs identified by Cabili et al	4248	chrX	+	134169665	134174761	AACTTGCCATCCAGAATCTGTGGCTTTTTGTCACAGGACTACAGAACCAACCTCCTTTTG	intergenic
599	ASHGA5P042414	0.000113111	0.000794245	3.58725	ENST00000427609	RP1-90K10.4	GENCODE	479	chr6	+	36907862	36912451	CTGTCCTTTAAAATAGTCTCTGCATTTTTCAGATGACTGCTACCCCTGGTTTGGAGTTTG	intron sense-overlapping
600	ASHGA5P039072	0.000573677	0.00292423	3.58672	uc003ewf.1	AK098763	UCSC_knowngene	2568	chr3	+	147657791	147660801	GGGAGGATGGGAGAGGGCCATGATAGTTAAAACTAAAAATAAGATTTACTTGGAGAACTG	intergenic
601	ASHGA5P026609	1.69625e-07	5.569e-06	3.58477	ENST00000542477	RP11-807H22.5	GENCODE	698	chr11	+	71869907	71870905	TTTGGTTCCTCTTCTATGGTCTTGTCTCTGACAGCCACTTTGAATAAACCAGACACCACA	intergenic
602	ASHGA5P021465	7.60154e-05	0.000583798	3.58415	ENST00000532922	RP13-25N22.1	GENCODE	519	chr11	+	1594486	1618779	GGTGCCAATGATGGAGACAACAGGAAGGAAAGAGACCTTCCTGGTCACACTTGGGCCACA	intronic antisense
603	ASHGA5P039327	0.0131629	0.0363003	3.58238	NR_027441	FLJ36777	RefSeq	2140	chr4	-	7099150	7105103	CAGGTGTCCAGAATTGGTTTATTTCCCATCTTAATTGTAGATTTACAATGTAAATGAGCC	intergenic
604	ASHGA5P055807	0.00126671	0.00550675	3.57393	NR_046527	PCDH9-AS2	RefSeq	538	chr13	+	67399300	67489163	TAATTATTGGTATAAATGAGCTTTGTGAAGTCGACTGTTCAGTGCCCTGAATATCAGCTG	intronic antisense
605	ASHGA5P057128	2.57162e-06	4.2212e-05	3.56834	TCONS_00013584	XLOC_006239	LincRNAs identified by Cabili et al	354	chr7	+	127752093	127758774	ATTAGAAGAGTCACCACTCTTCTGGATTTCCTGCTACAACAACAGAATACCACAGACGCG	intergenic
606	ASHGA5P039845	1.98655e-06	3.4722e-05	3.56146	uc003gpk.1	CR936688	UCSC_knowngene	3788	chr4	+	17629878	17633666	GGACACTAGAAATACAAGGTATGGGTCATTAGTAACGCTAATAACATTTTCCTATAGATG	natural antisense
607	ASHGA5P058164	0.000254568	0.00151806	3.55553	TCONS_00027243	XLOC_013275	LincRNAs identified by Cabili et al	471	chr19	-	23487808	23493434	CATTACTTAGGTATGGCCCAGGCAGGAGAGAAGGGTCATATCACCTAAGCTCTGGATTCG	intergenic
608	ASHGA5P037177	1.29573e-05	0.00014441	3.55546	NR_033967	SLC2A1-AS1	RefSeq	1138	chr1	+	43424719	43449029	CATGTTTTAATTGGTAAGTCTAAATGCAAAACGATGACAATAAAATTTTAAAGGACTGCT	natural antisense
609	ASHGA5P044207	2.35599e-05	0.000229831	3.55515	ENST00000533301	RP11-350N15.3	GENCODE	377	chr8	-	38258053	38259201	CCAAGAAGTTATCAATGTCTTCAAAACGTTGATTACTTTAAGACAGGCTTTTCTGCAAAC	intronic antisense
610	ASHGA5P039345	1.02069e-05	0.00012043	3.55289	uc003gnd.4	BC070495	UCSC_knowngene	1275	chr4	-	14472089	14473364	GGCCAGTTTTCAACATTCGGTCTGAAATTGAGGAGTTGCTGTATGAAAAGTGAATTTATT	intergenic
611	ASHGA5P014957	0.00145502	0.00616861	3.55033	ENST00000415154	LINC00226	GENCODE	571	chr14	+	106744314	106744966	CTCATGTATATGTTTTGTGCTTCTCTGGTATAACAGCATGTTGAGAAAACTGAAGAGCCC	intergenic
612	ASHGA5P050915	2.91366e-05	0.000270008	3.54824	NR_029405	LOC643406	RefSeq	3799	chr20	+	5451841	5457780	ACTTCACTAATACACTGAGGGCTGCTATTAAGTTCTATGTACAAAGACCCATGGCAGGCC	intergenic
613	ASHGA5P044148	2.36134e-08	1.247e-06	3.54366	uc003wzi.3	BC048103	UCSC_knowngene	3755	chr8	-	19448175	19451930	TTATAGACTGTACTTAGGGTGTATTTAAGTAATTCTTCCCTTCTGTCCTTGAACCTCCAG	exon sense-overlapping
614	ASHGA5P046947	0.000785108	0.00376709	3.54253	ENST00000452836	RP11-178G16.2	GENCODE	360	chr10	-	75855923	75862185	AAGATATAAACTCCAAAATCAAAACAAAGTAGCCTCTTAAGATTATCCAAGCCGGCCGCA	intronic antisense
615	ASHGA5P041206	0.00204905	0.00811171	3.53996	ENST00000514696	CTD-2269F5.1	GENCODE	582	chr5	+	83680244	83695469	ATTTAAAAAAATTAATCTCATTGACTATCAATTTGGATTCTGGAGCATACCTGGATTCAG	natural antisense
616	ASHGA5P036065	0.00652809	0.0207745	3.52439	ENST00000568756	RP11-1223D19.1	GENCODE	1852	chr2	+	110988609	111024095	TTTCTCCACAAACTGAGAGCTCCAGAATTGATGACTCAGAGTGAACCGAGGAGATCACTA	intergenic
617	ASHGA5P051589	0.000102147	0.000735457	3.52397	ENST00000489609	FAM86DP	GENCODE	839	chr3	-	75471868	75484186	CTGTTTCCAGGCCGGGCTGGGATCATATGGGAAGCGGAAGCTCATCATGACCAGAAACTG	intergenic
618	ASHGA5P040674	2.13324e-08	1.155e-06	3.51993	uc003kwu.1	LOC553103	UCSC_knowngene	916	chr5	-	131701645	131705196	GGAGTAGTCAGCAATTACTTGCCTGAGGAAGGGAAGGCCTCCTCCTTTAAGAAAAGAATA	bidirectional
619	ASHGA5P049234	7.20778e-06	9.152e-05	3.51817	ENST00000444023	MT1JP	pseudogene	408	chr16	+	56669650	56670998	GTCCACGTGCGCCTTGCGGTCTCTCCATTTATCGCTTGAGATCTCCAGCCTTACCGCGGC
620	ASHGA5P046657	6.70471e-05	0.000526081	3.51427	NR_038998	LINC00629	RefSeq	1333	chrX	+	133684053	133694428	TTTTTTAAATAAACACTCGTCCCTTGATAATGTATTTCTTTTTCATAAAATTAAAAAAAA	intergenic
621	ASHGA5P045819	0.000567219	0.0029028	3.51267	ENST00000421234	LINC00475	GENCODE	467	chr9	+	94909873	94910588	GCCAAGGGGCAGTACCGGCTTTCTGCTGGTGCTGATGAGCTGTGGTGTGAACTCACGAAG	intergenic
622	ASHGA5P023565	0.000210085	0.00130308	3.50905	ENST00000585028	RP11-172F10.1	GENCODE	557	chr18	-	4775052	5004523	TTCAATCTAGATGCAGCTGCCACTGGGAGCCCTGTGCCTTAGCCATGGTCAACCCACCAT	intergenic
623	ASHGA5P021285	6.30825e-05	0.000499842	3.50024	ENST00000529456	FAM66B	GENCODE	1432	chr8	-	7159132	7212876	GGAAAAACAACCTGCAGAGTTACTATGAATTATTATATTGTGGCTACTTACACCAAGATG	intronic antisense
624	ASHGA5P038291	0.000729294	0.00356131	3.499	uc010hno.3	LOC100506994	UCSC_knowngene	2665	chr3	-	62247493	62304622	TTCACTTTTGACAGAAGCTGTCCCTCAAAAGCAAACATGCAATAGAAGAAACAGATCTCA	natural antisense
625	ASHGA5P038648	3.375e-10	7e-08	3.49683	TCONS_00023895	XLOC_011197	LincRNAs identified by Cabili et al	417	chr15	+	30115424	30117856	ATCAGCCACTACACAAACTTCCCACAATGTTGACGGCTTTGCTAAACACCAAGGAACATG	intronic antisense
626	ASHGA5P025725	0.000146362	0.000978732	3.49372	NR_028395	TSNAX-DISC1	RefSeq	3454	chr1	+	231664398	231954990	AAATAAAACTAAGTTTACAGGCAAGATCCTACTCACAGAGGCTCTTGGGATCAAGGCTGA	exon sense-overlapping
627	ASHGA5P038154	0.000130316	0.000893593	3.4937	NR_038320	LOC100507634	RefSeq	2048	chr1	+	55681080	55683128	CTAAACTGATGTAAGCAGGCTGTCATAAGGTACATGCTGAGGAATTTATTCAACAAATTG	bidirectional
628	ASHGA5P036129	0.00027668	0.00162394	3.48881	ENST00000419223	AC023347.1	GENCODE	440	chr2	+	127069990	127086709	GAATCCATGGCTTTCAGTGTCTGGCCCTATTTCTTCTAGTTCAAGAATTTTAAGAAAAAA	intergenic
629	ASHGA5P034113	4.05168e-05	0.000349747	3.48647	uc021uqy.1	DQ580047	UCSC_knowngene	937	chr19	-	19853547	19854484	TTTGGTCAAACAACCAATGGGGACAGAGTCTTGGGGTCAGGTCCAGCAGGAACTGCCACC	intergenic
630	ASHGA5P039826	8.76571e-06	0.000107199	3.48463	ENST00000503493	RP11-448G15.1	GENCODE	459	chr4	+	10008105	10011349	CTTATCAAAGCCAAGCCATTCAGTATTATTTCTGTGGCTGCCAGTGTTGTTTCAAATAAG	intronic antisense
631	ASHGA5P000015	0.0149615	0.0402799	3.48458	AI015500		LincRNAs identified by Khalil et al	377	chr6	+	4099336	4174378	GAAGCCTCAGGTGTATGCATGTCTGTTCGTATGTTGTCTACATAATACCAAGTTGACTTC	intron sense-overlapping
632	ASHGA5P043856	1.72134e-06	3.1028e-05	3.48233	uc003vhq.1	BD495725	UCSC_knowngene	1949	chr7	+	115893169	115895118	GAGAAGGTTATCTAGTTCAGGGCATTGATCTGCTTAGATCTTTTCATCTTAAAGAGAGAA	intron sense-overlapping
633	ASHGA5P055111	6.13646e-07	1.4508e-05	3.47905	ENST00000544820	RP11-725K16.4	GENCODE	562	chr11	+	102617740	102622522	GATAACCTGCATCCACGGACTGCATATTTTCATCATACCTGGTAACAAAAAATAACTAAA	intergenic
634	ASHGA5P029460	3.16479e-07	8.718e-06	3.47863	ENST00000556503	RP11-298I3.4	GENCODE	802	chr14	+	23451906	23468287	AGAATGGTGGCACTGAAGGACATGGCGGATGGGGCAGTAACAACCACGCTTACACTGCTG	natural antisense
635	ASHGA5P016614	0.000412652	0.002228	3.46743	ENST00000432211	AC104655.2	GENCODE	447	chr2	-	105713509	105715095	AGCTTCAACTTGCGAAGATGGTCTTCAGCTCAAACTTCCCCAATTTATTCCAACTTCTAA	natural antisense
636	ASHGA5P031092	2.4124e-09	2.43e-07	3.46245	ENST00000563777	FBXL19-AS1	GENCODE	3951	chr16	-	30930639	30934590	TCCAGCTTCTCTTGAAAAGTCCTGAAATCTAGTCCAGGACCGTGGATTGTATTTAAAAAA	natural antisense
637	ASHGA5P042191	1.95703e-06	3.4357e-05	3.45843	uc011egv.1	AF086258	UCSC_knowngene	544	chr6	-	169575398	169582835	TGTCTTTGTGCTTGCAGAAAATCACGGTGGGCACAAAATTTTGGACACGATTTCGAGAGC	intergenic
638	ASHGA5P023416	0.00192516	0.00773482	3.45724	ENST00000580511	BVES-AS1	GENCODE	853	chr6	+	105584182	105616776	TCTTCAAGCTTTATACAGGACTCCATCATAGGACTGGAGAGAGATTGGATGTCAGAGTGA	intronic antisense
639	ASHGA5P045585	1.84383e-06	3.2678e-05	3.45675	ENST00000442069	RP11-143M1.2	GENCODE	575	chr9	+	72715	75298	AGTGAACGCGTTGGGAACAATATGGAAAACTGGGAGCCGCCTTGGAATCTACAGGGCCGG	intergenic
640	ASHGA5P018991	6.4253e-07	1.4976e-05	3.45122	ENST00000486551	MT1DP	pseudogene	150	chr16	+	56677636	56678677	TGCGCCACTGGTGGCTCCTGCACCTGTGCCAGCTCCTGCAAATGCAAAGAGTACAAATGC
641	ASHGA5P043541	4.71406e-05	0.000393781	3.45091	ENST00000439285	MACC1-AS1	GENCODE	639	chr7	+	20181538	20193154	CAGGTTGTGAATAGAAGATACAAAGGAGTATTAGATCTGCATTGATTAAATGGTGACTAC	intronic antisense
642	ASHGA5P056102	2.59921e-06	4.2445e-05	3.44907	TCONS_00027246	XLOC_013275	LincRNAs identified by Cabili et al	617	chr19	-	23491544	23493504	CAGGAAAAGAGAGTCACCTTGGTGAGAATGTCAGAGATATTCCATTTTTGGGTATTCACA	intergenic
643	ASHGA5P031320	2.6185e-06	4.2705e-05	3.44428	ENST00000562921	RP11-345M22.2	GENCODE	366	chr16	-	79750621	79804460	AGCTGAAGAAGCTCTGGAAGATACCATTTGAAGTCTTGAGTGCTTGAACTCACAAAGAAA	intergenic
644	ASHGA5P043505	0.0011724	0.00517625	3.44328	ENST00000447039	AC005532.5	GENCODE	626	chr7	+	7311038	7317404	ATGTGAAGAATGCTAAGTCTTGTGTGGAGAATAGAGGGGAGCATGAAGACAATCCACAGC	intergenic
645	ASHGA5P035933	0.000293502	0.00170218	3.44031	ENST00000441587	ALMS1-IT1	GENCODE	1766	chr2	+	73684229	73686609	CAAACCAAACAAAAACCATGAACTGCTGCCAAGATTCCTATTCTCATTTCTTGTATCTAT	intron sense-overlapping
646	ASHGA5P049321	0.000429852	0.00230613	3.43544	ENST00000498687	RP11-331F4.4	GENCODE	697	chr16	+	75260414	75261204	TACACCCTGCAACCAACAGGAAAAGGGTCGGAAATGAACTGCAGGCTGGGGAACCAGCAC	intergenic
647	ASHGA5P042411	0.000541025	0.00279375	3.43063	ENST00000411643	RP1-50J22.4	GENCODE	319	chr6	+	36354607	36359771	TCTCTGCCATCCTGTTGAAGATCCTATTTGAAAAAAGGGAGACACAGAGAAAGGTTTTTT	intronic antisense
648	ASHGA5P019809	0.000794985	0.00380224	3.42956	ENST00000503483	CTC-281B15.1	GENCODE	560	chr5	-	80499914	80597304	CAGAGGCAAGCCACATAATATTACCTTTGGCTGATGATCTATTCTGTAGGAAGTCTGCTG	intronic antisense
649	ASHGA5P029437	5.21022e-07	1.2746e-05	3.42922	ENST00000555654	RP11-998D10.2	GENCODE	659	chr14	+	21485228	21485921	TAACATCAAAATGGGGGAGGAGGAGAATTTAGGGGTCTGGGTCCCTAAGAGATATTAGGA	natural antisense
650	ASHGA5P048374	4.5038e-06	6.4244e-05	3.42548	ENST00000528660	RP11-736K20.5	GENCODE	1156	chr11	-	86603255	86633146	CAAAACTATTTGGTGGATCGTGACAAAGACGAATGACTGGGTACTATAATTTAAAATGGA	intronic antisense
651	ASHGA5P032080	6.14768e-05	0.000489959	3.42504	ENST00000574290	RP1-59D14.5	GENCODE	846	chr17	-	2278354	2282600	ACCATTGAAAAACTTGATGATGTCAGTGAAGTCCATGTTGTTGTCACGGATGATCTCTCG	natural antisense
652	ASHGA5P045509	6.04703e-08	2.512e-06	3.42059	NR_027440	LOC100272217	RefSeq	2159	chr9	-	133452736	133454881	CATGCAGTTATATGTTTATTGTCTGCCTTTTCCACTAGAATAAAGCCTCTGCTGACATAA	bidirectional
653	ASHGA5P053127	1.95751e-06	3.4357e-05	3.4203	uc022afz.1	STAG3L2	UCSC_knowngene	614	chr7	-	74299833	74304518	CATTGTGTAGGCCTCTAATTGAGGCCTGGCCTCTGCTGTGGGTGAATTTCTGTACTGGAA	intergenic
654	ASHGA5P044618	0.00197355	0.00787929	3.417	uc022aqp.1	BC047307	UCSC_knowngene	962	chr8	+	1817437	1818399	TAGAATCTAAGGAAATAGTTAATGATGCACTCGCTGCAGGGAAGAGCACACTGAACCACG	intron sense-overlapping
655	ASHGA5P021628	1.44294e-08	8.75e-07	3.41679	ENST00000536560	RP11-90D4.2	GENCODE	272	chr12	-	8535439	8538323	AATGCAGTGCTGCTTTCTGTCTTGTTATCACATTTCCTTGGAGGAGAGCCCAGCCTTGGT	intergenic
656	ASHGA5P046488	0.00029528	0.00170878	3.41663	uc010ngy.1	BC132858	UCSC_knowngene	1620	chrX	+	37478968	37480588	TTCAGACTCCACACAGAGATTGACACAGCACTGGCAGAACACATAGATACCATTGCTTAA	intron sense-overlapping
657	ASHGA5P033718	0.0011656	0.0051573	3.41432	ENST00000580684	RP11-835E18.2	GENCODE	1009	chr18	+	5238548	5243910	TTCCTTGATGGAGAACTATCAAAGCAGTCAAAGCTATCAAAATAAAAAAGAATTCTGATT	intergenic
658	ASHGA5P023126	0.000163011	0.00107021	3.40909	ENST00000570612	RP1-300G12.2	GENCODE	319	chr6	-	82237083	82244632	GATCCAGACCTACATAGAAAGAAAGATTTGAGTGCACACTACATACATTAGAAGAGAAAA	intron sense-overlapping
659	ASHGA5P047133	0.000266314	0.0015798	3.40279	TCONS_00013659	XLOC_006321	LincRNAs identified by Cabili et al	1301	chr7	+	158766825	158770364	TTGTTTCGTTTTTCCGAGGCGACATTCGGTGCAGCTTTCTGGGTCCCCAAGGCTGACCCT	intergenic
660	ASHGA5P020460	5.65669e-05	0.000457445	3.40226	ENST00000513919	RP11-844P9.2	GENCODE	735	chr5	-	175570452	175575050	GGACTTACAGGATCTAAAAAATGTTTGTGCAGCCATTTGGACCTCAGTATGAAGTGGTGT	intergenic
661	ASHGA5P056574	1.43475e-06	2.7673e-05	3.39979	TCONS_00006196	XLOC_002793	LincRNAs identified by Cabili et al	355	chr3	+	125485333	125505694	ACCGGCACCCAGACAGGTGGCGACGGCAGAGGAGAAGGAAAATACATGTACAGCCAACTT	intergenic
662	ASHGA5P023794	0.000441418	0.00235621	3.3958	HMlincRNA440+	HMlincRNA440	LincRNAs identified by Khalil et al	6508	chr5	+	64421409	64427917	ATACACATAGATGGGCTGCATCCTTGAATCCCAATTCCACATTCCCAGGGAAATTCCACT	intergenic
663	ASHGA5P057930	1.32134e-07	4.611e-06	3.39345	TCONS_00023866	XLOC_011176	LincRNAs identified by Cabili et al	1606	chr15	+	24545217	24571710	AGCCCAACTGTCCAGCTTACATCCAGATCCTTTGGCATTTGAGAGTTGCTTTGTGTATAC	intergenic
664	ASHGA5P031847	3.73448e-06	5.6337e-05	3.38817	ENST00000501143	RP11-61A14.4	GENCODE	2894	chr16	+	66785654	66788643	ATTCTGGGGAGGGACTTTTGTACCATATAAAAATACTAAAATCCAAATGTCCCACATAGT	natural antisense
665	ASHGA5P028153	3.60772e-05	0.000320372	3.38802	ENST00000553247	RP11-54A9.1	GENCODE	1083	chr12	+	76653684	76698911	CAAAAAAGCGCCACTGCAGGGAGGAATGCCAGGGTCCCATAGAGGGAGACCGACAGTGAA	intergenic
666	ASHGA5P051217	8.06199e-08	3.143e-06	3.38764	ENST00000461808	BCRP2	GENCODE	1832	chr22	+	21457304	21476073	CCTCCTGCAGCTCTTTCAGACCCAGTTGCAAAGAAGAGCTGCATGCTCAACCTGCTGTCG	intergenic
667	ASHGA5P040534	3.93004e-05	0.000342985	3.37619	ENST00000505694	CTC-459I6.1	GENCODE	535	chr5	-	80243515	80256726	GTTTGTTGTATTTTCAAAATTGTGGTATAACTGACTTACAATAAACTTCATATATTTAAA	natural antisense
668	ASHGA5P019897	0.000125713	0.000867195	3.37489	ENST00000504906	AP000892.4	GENCODE	488	chr11	-	117187077	117198754	TCCGGAAAAGGTCAGAAACCACTATTAGAACTTTTTCTTACAACTCAACAGCCAAAACAA	natural antisense
669	ASHGA5P048874	0.00024005	0.00145281	3.37411	ENST00000561209	RP11-561C5.5	pseudogene	3611	chr15	-	85798599	85814123	CTCCCCACAGGCCCAGATACAAAGGCAGATACTGTGTGGGTAAGCGGAAGCGCTTCCGCC
670	ASHGA5P035896	0.000199495	0.00125149	3.37227	TCONS_00026930	XLOC_012991	LincRNAs identified by Cabili et al	281	chr19	+	18315534	18316371	TCAAGAAGAAAATTCGAAGAAAAGGTTTAGCAGGGACAGAGAAGCGACCTGTCCCGGAAA	intergenic
671	ASHGA5P043908	0.000230866	0.00140854	3.37032	ENST00000483283	RP11-775D22.3	GENCODE	575	chr7	+	129813557	129845201	ACTCAATCTCTTGAACAAGTGGCACTAATATTGTCTCATTGATCCACTAGAAGAAATAAG	natural antisense
672	ASHGA5P037034	4.94842e-08	2.177e-06	3.36793	ENST00000430679	RP4-550H1.4	GENCODE	467	chr20	+	34660362	34662831	GTAGACAAAATTAGAATCAGATTGTAGAAGGTCTTGGATGCCAGGTTAATGATTTTGAAC	intergenic
673	ASHGA5P037380	0.00139176	0.00594578	3.3661	ENST00000448463	AP001347.6	GENCODE	780	chr21	+	15399771	15461367	GTTTGGATGTTAGCAGTTAGTTTAGCTTTGCGTCTTCAGAGCAATTGTTCTTAGCTACTT	intergenic
674	ASHGA5P043113	0.0103919	0.0301342	3.36597	ENST00000436600	RP5-942I16.1	GENCODE	691	chr7	-	69060943	69062434	CCTTTCAACAACTTTGGGGATTGGGTTGAGGAAGGTGTGAAATTGGGAAATATAATAAAA	intergenic
675	ASHGA5P016803	0.000291975	0.00169565	3.36248	ENST00000434426	RP11-73B2.6	GENCODE	744	chr7	-	63385225	63386655	GGTTGCCATGATTAACTCTTAAGTACTCCACGCTTCTGAAACGGGCGTAGGCACAGCGTC	intergenic
676	ASHGA5P018448	0.000447116	0.00238161	3.35439	ENST00000453677	RP11-325F22.4	GENCODE	736	chr7	-	104653871	104654768	AGTGCACGGGATGCATTCAACAATCCACCGAAGGTTTGAGGAAGTGTCGGTATTCGGTGG	natural antisense
677	ASHGA5P045275	0.00225944	0.00877734	3.35079	uc004ahp.1	LOC100507244	UCSC_knowngene	1924	chr9	-	72784558	72790804	CCTTTGACTAAACTTGGTTGTACCTCCCTATATCCAGATTCTTAGCCAAATTTTTCTAAT	natural antisense
678	ASHGA5P050612	0.00018121	0.00115624	3.34666	ENST00000563035	RP11-1223D19.1	GENCODE	2909	chr2	+	110991863	111024106	TTAACGTCACTAATTAAAAATTATAGAATAAAACGACAATAAAATACCATGTGTTTGCCT	intergenic
679	ASHGA5P045851	3.22404e-05	0.000291614	3.34548	NR_038982	LOC100507346	RefSeq	1957	chr9	+	98225890	98232301	GTTTGTTTTCTTCCAACATGACATACTTCACGTTACTGAAACTCCTGTGTAGGTCGTAAA	natural antisense
680	ASHGA5P014599	2.21247e-05	0.000218544	3.34232	ENST00000411710	AC010095.5	GENCODE	477	chr2	-	109293250	109295057	GAAGCACCAGACTGAGCTTGGGAAATGATAAAGCAAACTGTGGACTTGAATGAAAGACAT	intronic antisense
681	ASHGA5P042309	2.67701e-05	0.000254296	3.3392	NR_038929	LOC100131289	RefSeq	828	chr6	+	27729522	27730966	CAGGAGATTGATGCATCCCAGTTTACTCTTTTTGGCATATGTTTTTACTCATAAATTAGG	intergenic
682	ASHGA5P054394	7.78493e-08	3.073e-06	3.33844	ENST00000443921	PRINS	GENCODE	2195	chr10	+	24536050	24544975	CATTGTATAAAACATTCACTTTAAATGTATACCGAAATGTCCTTTAGGCCGGGCGCAGTG	intron sense-overlapping
683	ASHGA5P057653	0.0157124	0.041834	3.33606	TCONS_00020437	XLOC_009765	LincRNAs identified by Cabili et al	1645	chr12	+	54536294	54546523	AAAGGATTTTCATCAGCTGCAAGTCTGGATGGGGAAACTGAGGCCTGAAAAAAGGACTGT	intergenic
684	ASHGA5P027661	1.12649e-05	0.000128486	3.33508	TCONS_00012215	XLOC_005769	LincRNAs identified by Cabili et al	267	chr6	-	78060411	78078829	GATGCAAGTGGCTGGTCATGGAGAGGACTTTTTGACGAGCGCCGGCAAAAGAGCACAGCG	intergenic
685	ASHGA5P028403	0.00107031	0.00480958	3.32872	ENST00000537762	RP13-895J2.3	GENCODE	1000	chr12	+	132853934	132855447	GCAGCTGAGGACCACAGGAGGTCAGGGACATGCAAGCTCAGTGCCCGAAGTCACTTCTAG	intronic antisense
686	ASHGA5P055567	0.00019236	0.00121515	3.3283	ENST00000549806	RP11-486A14.2	GENCODE	332	chr12	-	93721771	93771484	AAAGAAGAATAAATGGGACATTACACAAGGTATGTTTCTCTGATTTTCCACTTTCTATCC	bidirectional
687	ASHGA5P044991	5.26152e-05	0.000431547	3.32812	NR_002835	HAS2-AS1	RefSeq	2300	chr8	+	122651585	122657564	AATTTTGTGTACTCTGATAATACATTAAAATCTGTTTATGTACTCTGATAACACATTCAA	natural antisense
688	ASHGA5P027402	0.00673002	0.0212834	3.32508	ENST00000489520	RPSAP52	GENCODE	1144	chr12	-	66151799	66220754	TCTTGCACGGACTCTTAAGCAACATGAAAATAAGGTTGACAGAAAATAAACATCAGTTTC	intronic antisense
689	ASHGA5P058125	8.67408e-05	0.000646629	3.32313	TCONS_00026698	XLOC_012798	LincRNAs identified by Cabili et al	374	chr18	-	25512852	25513932	AAAGTCTTAGTTAGAAAACCTGGCCCATAGAGAGCTTACACCTATGACCTTGGCTTCGTG	intergenic
690	ASHGA5P044135	4.01888e-07	1.0324e-05	3.31814	uc003wvy.3	LOC649305	UCSC_knowngene	3885	chr8	-	12394587	12523023	GTTTGACTAAGAAAAACAAAGTATTTAAGCTCATCTGTAGCTCAAAGTGCCTATCCGTGT	intronic antisense
691	ASHGA5P046449	7.3962e-09	5.55e-07	3.3181	ENST00000434674	GS1-526D21.5	GENCODE	412	chrX	+	13785518	13785984	TGAATGTTCCTTGGACTCTTGGTTAATTCAAGTCCAAAGCACAGGACACTTGCCAATTAA	intron sense-overlapping
692	ASHGA5P029381	0.00303071	0.0111546	3.31427	ENST00000551271	RP11-521B24.3	GENCODE	2279	chr14	-	105883220	105886076	TTGCTGAGAGGTGGCACGTGACCACATCCATGTCATTCAACAACAGAAAAACAAGTCATC	bidirectional
693	ASHGA5P028960	0.0149078	0.0401769	3.3142	NR_044993	LOC100506394	RefSeq	1942	chr13	+	114567149	114569805	CTATATCATACAACCTGAAATATCAATGGTGAAGTAGACAGTTCACCTCCACAGGGGGCA	bidirectional
694	ASHGA5P032785	4.58382e-06	6.5192e-05	3.31032	TCONS_00028993	XLOC_013911	LincRNAs identified by Cabili et al	220	chr21	+	32996943	32997467	CAACGGCAAAGGGCAAATCAAACCTAATATTGAATAAGGGAGAAGGAGTGCCAACTGGAT	intergenic
695	ASHGA5P051195	4.59478e-05	0.000385341	3.31016	NR_037611	SEPT5-GP1BB	RefSeq	4671	chr22	+	19704742	19712297	AATCCTGTGGGTCAGAGCTGGTGAGGATGCTCAGAGGGCAAGGGAATGTCCACAGAAGCA	exon sense-overlapping
696	ASHGA5P045707	6.255e-10	9.7e-08	3.3045	NR_024006	FP588	RefSeq	5245	chr9	+	35860270	35865515	TTAGAGACTAAAAATCATCCTTCAATAAAGCAGCAGAAGTTGCAAAGTTTCCTATGATGC	intergenic
697	ASHGA5P042485	4.30372e-07	1.0864e-05	3.3031	ENST00000420759	XXbac-BPG55C20.7	GENCODE	301	chr6	+	58291907	58298496	TGGTGCTAGCATATATAAGACTGAAACACCAAAGTCCTCCGTGGAAGTTAATGAATTTCT	intergenic
698	ASHGA5P032739	0.000177504	0.00113734	3.30155	ENST00000572499	RP11-1260E13.2	GENCODE	748	chr17	+	202428	207372	GAAAGAAGCCGTGCTCAAGGTAAGATGCTACAGATGCAATAAATTCATGTTTTAACATTA	natural antisense
699	ASHGA5P015206	1.08392e-07	4.016e-06	3.29989	NR_015423	PGM5-AS1	RefSeq	536	chr9	-	70970108	70972757	ACAGGGCCGGGCTGAAGAAAAGAAGAATGGTATTCATGCAGTTCCCATTTTACAGATGAA	intronic antisense
700	ASHGA5P033578	0.0079504	0.0243008	3.29957	ENST00000581134	RP11-344B2.3	GENCODE	468	chr18	-	29825908	29828995	CCTCCTCTTGAATGCTCATTTCAAGAACTTGTTAGAAACTATTTGTAAAGAGGGTATAGT	intron sense-overlapping
701	ASHGA5P020464	6.55431e-08	2.688e-06	3.29646	ENST00000514073	AC226119.4	GENCODE	682	chr4	-	3916909	3957146	CCCCTTTTCATTCCCAAGAACATACTCACAGTGATTGATCCAGCCATTGGTAATCTAAAA	intergenic
702	ASHGA5P016031	6.33278e-07	1.4806e-05	3.296	ENST00000426044	CTD-2666L21.1	GENCODE	917	chr19	+	12305831	12348582	CCGGAAAATGATTCTTCACGGAAAAATCCAGCAAAGCCTACTCCTTCTGGATGAAGTTCA	intergenic
703	ASHGA5P026139	6.87111e-06	8.8757e-05	3.29391	uc001lxy.2	LOC650368	UCSC_knowngene	2507	chr11	+	3402190	3430378	ATAATTCTTCAGTCCTTGAAGAGCATCCAGCACAGAAGGTAGAAACCCTCCTTAAGGCTC	intergenic
704	ASHGA5P019023	3.2014e-06	4.9961e-05	3.28847	ENST00000474656	RP4-545C24.1	GENCODE	773	chr7	+	143892450	143911316	GAAGTTTCAGTATGCATTCTTAGAAACCAGATATACAAAGACAAGATCTCTGCTTTCAAG	natural antisense
705	ASHGA5P045632	4.29523e-05	0.000365297	3.28279	ENST00000430640	RP11-183I6.2	GENCODE	414	chr9	+	16473185	16476235	CACTGCTACTAGAAGCCTTCATCACTTGCAATAATAGAGGATGATGATTCATTACAATAA	intronic antisense
706	ASHGA5P042745	0.00110478	0.00493646	3.28203	ENST00000430250	RP1-266L20.4	GENCODE	335	chr6	+	170125599	170139088	AGCTCCTTAACTCTCATAAGTGGAAACTGACACCAACTCATTATAAAACCTAAGTGGAAA	intergenic
707	ASHGA5P030900	5.7796e-05	0.00046501	3.2809	ENST00000570515	LA16c-380H5.2	GENCODE	608	chr16	-	3053431	3055102	TTAGACAAGTCTATTTTCAGACTCGCTCCTTTCTCTACCAAACCTGAGCTGCTTCCGATT	intergenic
708	ASHGA5P043288	0.000375015	0.00206348	3.27803	ENST00000456289	AC073130.3	GENCODE	585	chr7	-	115877982	115879305	CAAGGTGATAAAAAGGAAAATGATTCCTAACAACTTGGGGGTATGTGGAAGCAGGGGAAG	intronic antisense
709	ASHGA5P038667	0.000113735	0.00079759	3.27784	ENST00000451707	AC087430.1	GENCODE	3699	chr3	+	1049818	1054618	CAAATATAACTTTACTGATTGACTTGAATAGAGGCACAAACAGCATCCCTTCAACAACAT	intergenic
710	ASHGA5P043792	2.1641e-05	0.000214917	3.27308	ENST00000411728	AC002451.3	GENCODE	558	chr7	+	95239107	95242853	GTTTCCAGAGTTAGTTCCTTACAAGCATTTCCTCTTGAAACATCGGGAATCTAAATAAAG	intergenic
711	ASHGA5P035745	0.00366902	0.0130381	3.27284	ENST00000448241	AC023137.2	GENCODE	308	chr2	+	20650802	20652708	TTAGGATCCAACTGGAAAACATAAAGATGAATTGCTGTAGGCTGGAAAATCAATTAGGAA	intergenic
712	ASHGA5P057727	7.63273e-05	0.000585164	3.2702	TCONS_00021207	XLOC_009869	LincRNAs identified by Cabili et al	722	chr12	+	106643486	106646559	TGCACTACACTTGGAGATATATACAGAAACCTGTTGAGGGCTAACTTAGGTTGGCAAGGC	intronic antisense
713	ASHGA5P022954	2.77634e-07	7.939e-06	3.2698	ENST00000566325	RP11-27M24.2	GENCODE	435	chr16	-	10670355	10672040	GCTTGGCGAGTATCTCCGGTGCTTAATGAGTAGCTGCTAAAGTGAATAATTGAATTCCTG	intron sense-overlapping
714	ASHGA5P017082	0.000103401	0.000742891	3.26755	ENST00000437494	AC005077.5	GENCODE	300	chr7	+	75803626	75806523	TTATGGGATGGAGACGCTGACAGGCCCAACTGCTTCGGGATCGCCAAGCTCTGGAAGATT	intergenic
715	ASHGA5P025988	1.09139e-07	4.032e-06	3.26688	NR_047694	PIGT	RefSeq	2068	chr20	+	44044706	44054885	CGGGAAGGAGTGTGGATAAATCTTGGAAGGAGCTCAGTAATGTCCTCTCAGGGATCTTCT	exon sense-overlapping
716	ASHGA5P016460	6.00591e-07	1.4306e-05	3.26586	ENST00000430595	RP11-61I13.3	GENCODE	638	chr6	-	39856565	39865129	TCAGGAAAATGCTTCTCCAGGATCATGATCAGATAACTCTCCACTCTAAGCCTCCTGCAA	natural antisense
717	ASHGA5P020036	0.000634072	0.00318216	3.26131	ENST00000507060	CTD-2269F5.1	GENCODE	552	chr5	+	83680664	83683875	GACAGACCCTTGAAGCATCACTAAGAATGATTGCTTATTGTACATGGATCCAATTCCAGC	bidirectional
718	ASHGA5P038623	0.000214051	0.00132315	3.2585	NR_033944	LOC647323	RefSeq	1625	chr3	-	193675160	193721448	CAAGTTTCAGTGAACATGGTACTATGCATCATGAAGACTATCTGAAGTTGCTTTCAAATA	intergenic
719	ASHGA5P029282	0.0110815	0.03162	3.258	ENST00000380722	RP11-497E19.1	GENCODE	1747	chr14	-	85991476	85996332	CAAGGAAGATCACATTTTAGGACAAATACTCATCTACCTGCATTTAAACATCCATTTTCG	natural antisense
720	ASHGA5P030705	3.67737e-05	0.000325872	3.25542	NR_046096	LOC283692	RefSeq	2168	chr15	+	83316520	83361572	AACAGCCATTCAAGGAAGTCATTAAACTCTAGTGGGATGAATAAAGATTTGAGTAAGTGA	intronic antisense
721	ASHGA5P037410	0.0269775	0.0647093	3.25258	ENST00000434859	AP000477.3	GENCODE	847	chr21	+	25415571	25422601	ATCATAAAGCTGGTCTATCATGCCCAGTGCTTGGACAGAAGAAGAAGAGAGCAATGGAGA	intergenic
722	ASHGA5P015637	0.00499446	0.0166289	3.24944	ENST00000422129	BX571672.2	GENCODE	697	chr1	-	143118703	143194342	AACTACTTGACTGAGACACCCATAAACTCAGAAAATACAGTGTAAAACAAAGTGAAGAAC	intergenic
723	ASHGA5P019333	1.65124e-05	0.000174371	3.24856	ENST00000478666	FAM86DP	GENCODE	1068	chr3	-	75471569	75484197	TCATCAAAAAGACGTGCTGTATTGCCCAGAAGCCATCGTGTCGCTGGTCGGGATCCTGCG	intergenic
724	ASHGA5P021627	2.1133e-05	0.000211698	3.24832	ENST00000536505	RP4-765H13.1	GENCODE	280	chr12	+	126675923	126709860	CCCGACAAAGTTATCCTGGATCCTATCTTTGGTACCAATGTGACCCATCCTGAGTGAAGG	intergenic
725	ASHGA5P040040	7.33631e-05	0.000567483	3.24723	ENST00000569927	RP11-1299A16.3	GENCODE	5647	chr4	+	99580054	99585701	TGGGGCATATCTGTCTCGTAAATATGATTGAATAAGCATATGTAGAGCACAGTTGTTTCA	bidirectional
726	ASHGA5P019684	6.01294e-06	7.9703e-05	3.24544	uc003jqs.3	AK055666	UCSC_knowngene	2287	chr5	+	55290994	55299475	GCTTCTCTCCAAGACTTACGATTTACGGAATGGCCATCTTCCATAATTAACAAATAAATA	bidirectional
727	ASHGA5P040797	0.000733855	0.00357945	3.24292	ENST00000519040	CTC-367J11.1	GENCODE	368	chr5	-	149855093	149865531	CCAAAAGATCTACAAAATGCTCACACAGAGAAGATGACAGCTTCTACAAATAAATGTCAA	natural antisense
728	ASHGA5P048540	8.31186e-06	0.000102759	3.24273	TCONS_00027829	XLOC_013429	LincRNAs identified by Cabili et al	1463	chr19	-	58917723	58919829	TAGCACAAAAGTTATCAAAGAGGCTCAGCCATGGAGATTGCAAGCTGGGGATGGAAGTAT	exon sense-overlapping
729	ASHGA5P038287	6.7616e-09	5.26e-07	3.24062	uc003dkz.3	NPCR	UCSC_knowngene	2407	chr3	-	59956575	59958982	TGTTCCGTCAACTAGTTCACCGGTTAAACCCTGATTGAATGTAGAAATTTTAGAAATGAA	intron sense-overlapping
730	ASHGA5P022223	0.00300501	0.0110793	3.24005	ENST00000552736	RP1-97G4.1	GENCODE	597	chr12	+	77773599	77784644	AGCTTAATGGTTTACCTACAGCATCATAGGAAAATGGCAATGATAAAATGGGAGAGAATG	intergenic
731	ASHGA5P036762	1.58817e-07	5.268e-06	3.23716	ENST00000425233	RP5-977B1.7	GENCODE	443	chr20	-	35153903	35201387	TGGAGAAAATAAAAGGGCAGGAGTCTGGAGTGTGATAACTGTGGCTTCGTCTCATTTCCA	intronic antisense
732	ASHGA5P045482	1.85345e-05	0.00019095	3.23527	ENST00000429848	RP11-56D16.8	GENCODE	901	chr9	-	130478258	130487111	GCCTGTTTTGAGCATTTTAAGGAGTCTGGAGCCAGTTTGTCTAAGGCAACATTTCCCAAA	natural antisense
733	ASHGA5P038841	1.93826e-05	0.000197759	3.23384	ENST00000465933	RP11-755B10.3	GENCODE	2919	chr3	+	57678931	57682323	GCAGTCAACGACCAGGGAATAAATTATTCGTGGAATGACACAGTTCATAATTATTATAAG	bidirectional
734	ASHGA5P030529	2.9094e-09	2.81e-07	3.232	ENST00000569135	RP11-353B9.1	GENCODE	4094	chr15	+	49944335	49948429	GCTCAAGAAATACTTTATGTTTGTCCTATATGAAAGTGTTGATTGCACCTGGTTCTTTGC	intergenic
735	ASHGA5P036511	0.000834642	0.0039477	3.23167	ENST00000418050	AC017104.6	GENCODE	1313	chr2	+	232258389	232259702	TTCCCTAATTGGCACTTACAACATTCCAGAACATTCTATGGTACCTTAAGTTTCTCCTCC	intergenic
736	ASHGA5P027261	1.82105e-05	0.000188686	3.23013	ENST00000550644	RP11-133N21.10	GENCODE	570	chr12	-	49970622	49971288	AGGATTTTAAATCAAGGGAGAGACAGACACCAGTAAAACCCGAGCACATTCTTCCTTGAG	intronic antisense
737	ASHGA5P025715	4.1393e-09	3.59e-07	3.22596	NR_027910	CALB2	RefSeq	1445	chr16	+	71392615	71424342	AGATGTCCCGGGCATGAAGCTGACCTCAGAGGAGTTTAACGCGATCTTCACATTTTACGA	exon sense-overlapping
738	ASHGA5P056449	0.000755611	0.00365504	3.22281	TCONS_00004340	XLOC_002214	LincRNAs identified by Cabili et al	949	chr2	-	97932118	97934697	AGTTGGGAGATCCCTCACTGGGCAGGACCTAAAGACCTCCGTGCCAGGGAGAATTCAGAT	intergenic
739	ASHGA5P033460	0.000292741	0.00169854	3.21976	ENST00000489257	MT1P2	pseudogene	186	chr1	-	237167486	237167672	AGTGCAAAAAGTGCAAATGCACCTCCTGCAAGAAGAGCTGCTGCTCCTGTTGCCCCCTGG
740	ASHGA5P056100	4.10008e-05	0.000352484	3.21928	TCONS_00027245	XLOC_013275	LincRNAs identified by Cabili et al	453	chr19	-	23491531	23493434	GAGTCACCTTGGTGAGAATGTCAGAGATATTCCATTTTTGGGTATTCACAAAAAAGAATA	intergenic
741	ASHGA5P051218	0.000369187	0.00204027	3.21292	ENST00000398241	BCRP2	GENCODE	1842	chr22	+	21472878	21476574	TCCTCTACAGGATGGCAGAGAAGGAGGCAGTCAATAAGATGTCCCTGCACAACCTTGGCA	intergenic
742	ASHGA5P043397	0.00412867	0.0142518	3.21139	ENST00000480264	RP11-61L23.2	pseudogene	625	chr7	-	143530337	143530962	TATCAATGCCTACAATGACACCTTGACTGCAACGCTGATCCAGTTTGTGAAACATGGAGG
743	ASHGA5P028655	3.42031e-05	0.000306522	3.21135	uc001voi.1	AK123584	UCSC_knowngene	2796	chr13	-	100143728	100148992	TACTTTTCAAAGTCCTCTTCTCTGTTCCAGACCACTATGGGCAACTCTCTATCTATTCGA	intergenic
744	ASHGA5P038804	0.000105615	0.000755708	3.20765	NR_026988	LOC339524	RefSeq	3125	chr1	+	87595447	87602352	AAGGGAGAAGAGTGGGAGGAGGAAATAAGCAACAGGCAGCTTCCTTTCTTGACAGATGGA	exon sense-overlapping
745	ASHGA5P049108	7.6378e-05	0.000585164	3.20407	uc021ten.1	AK303572	UCSC_knowngene	1235	chr16	+	21415569	21416917	GGGAATGTTTTCACACATATTCATTTGATGGACAAAATTACCGCCACCAACACAGTCTGC	natural antisense
746	ASHGA5P047365	0.0396935	0.0879055	3.20271	TCONS_00014964	XLOC_007047	LincRNAs identified by Cabili et al	268	chr8	-	30593692	30594132	GGCAGACTTGCTATGTCCCTCTGAAAATTTCTTTCCCTTTACTGTATAACTTGCTTTTTG	intergenic
747	ASHGA5P015058	4.94436e-06	6.9079e-05	3.20213	ENST00000416105	AL078621.4	GENCODE	645	chr2	-	114286496	114300235	ACCCTACCAGGGTTTCAGTTGTGCAATTTCACCATTAGCAAAGCTTTTTGCTGAAATCTG	intergenic
748	ASHGA5P020437	5.45103e-06	7.3563e-05	3.19809	ENST00000513501	AC226119.4	pseudogene	530	chr4	-	3916913	3926001	TTTTCAGTTTTTCCCAAGAACATACTCACAGTGATTGATCCAGCCATTGGTAATCTAAAA
749	ASHGA5P048293	2.1311e-09	2.25e-07	3.19631	ENST00000524714	CTD-2313N18.5	GENCODE	447	chr11	-	71507007	71524492	CACGTCTACGGTGAAAGCTTCAGGTTACTGAAAGGGACCAGCGGACAGTTCCAGGTCATG	natural antisense
750	ASHGA5P039778	0.009316	0.0275659	3.19339	NR_015453	NOP14-AS1	RefSeq	3860	chr4	+	2937277	2952794	GACTGTGGGTGATGTTTCCCTTCTCTGATTTCTAAAATATCTGCAAACTTGTTTCATTTA	natural antisense
751	ASHGA5P041237	0.00043161	0.00231263	3.18925	ENST00000382265	FLG-AS1	GENCODE	1794	chr1	+	152221478	152243570	GAGGCATGTTTATAAGCAGATCTGAGTTTTGCCACACTGGAATTTATTTATTCATTGAAC	intergenic
752	ASHGA5P044289	0.0368383	0.0828127	3.18567	ENST00000476425	RP11-163N6.2	GENCODE	473	chr8	-	61317569	61421318	TTGAGCTTTGTGCAAGTCTCTGGAAAGAGACCCAAGATCGTGTGATGAGCAAAAGTGACA	intergenic
753	ASHGA5P015537	1.10324e-05	0.000126978	3.18566	ENST00000421140	NSUN5P1	pseudogene	1535	chr7	+	75039650	75045876	TGGATCCTTCCTGCAGTGGCTCGGGTGAGATGGTATGCCGAGCAGACAGCTGGAGGATCC
754	ASHGA5P007457	0.000580121	0.00295022	3.18538	ENST00000445745	AC016683.6	GENCODE	2570	chr2	+	113993813	114024587	CCACCACGGGACACATATACTCACAGAAATGAGTTATTTAAAGAAGACGGTCCAGATTCC	intronic antisense
755	ASHGA5P044486	4.34338e-08	2.009e-06	3.18111	uc022baa.1	AL832163	UCSC_knowngene	2799	chr8	-	117947898	117950697	ACAGGCAAAGCAAATTGAAGAATTGGAGCACTGAATATAACATCCACAGACATTTGAATT	natural antisense
756	ASHGA5P046584	3.18468e-05	0.0002895	3.18017	ENST00000444482	RP13-216E22.4	GENCODE	451	chrX	+	73168807	73169393	GCCAACTGTACCGTTAGTGATTAGTTTACATATAGGGAAAATAATTTGTGAATGTTGGTC	intergenic
757	ASHGA5P028216	0.000284409	0.00165627	3.17762	ENST00000552584	RP11-511B23.3	GENCODE	1269	chr12	+	93568141	93575608	TCAGTGACCCAAAAAGGAACTAAACGGTACCCAGACTAGAAATCAATGTCAAATTATTCA	intergenic
758	ASHGA5P051001	2.17975e-06	3.7479e-05	3.17165	ENST00000419931	RP11-445H22.4	GENCODE	514	chr20	-	43323716	43324725	ATGCCTACAATTCCACTATAATAGTCTGGTGGGCTTCTGTTAGGGAGGCTTATACATGGT	intergenic
759	ASHGA5P030051	0.0111418	0.0317637	3.17156	TCONS_00016732	XLOC_007620	LincRNAs identified by Cabili et al	205	chr9	+	140119093	140119403	TCTCAAGCATCTTGGTCTCTGCTAAGAAGAGGCTCAGAGGCTTAGAAGCCCTGCCTCGCC	exon sense-overlapping
760	ASHGA5P044011	0.0225115	0.0558251	3.16939	ENST00000563946	RP4-584D14.7	GENCODE	837	chr7	+	150038859	150039696	TGGAATTCATAAGGTGAGCAGAAACTCAAGGAAAACTGTCCAAATACCGGCTCGACTCCT	bidirectional
761	ASHGA5P046580	2.51232e-05	0.000241732	3.16847	ENST00000454388	RP11-493K23.4	GENCODE	1167	chrX	+	72300005	72304474	TTAGAGAGAATTGGAAAGCGTTTGAATGTGGCCCTGTTGTTTAATAAACGATAACAATGA	bidirectional
762	ASHGA5P019548	7.40232e-05	0.000571616	3.1655	uc003wdj.1	LOC154761	UCSC_knowngene	2405	chr7	-	143418750	143533810	TCCTTCCTATGATAGAAGACTTCTAACTCTCAGGAAGTAGTTTGTTTCTCAAAGAGAAAA	intron sense-overlapping
763	ASHGA5P031057	0.000293944	0.00170396	3.16418	ENST00000567731	RP11-22P6.2	GENCODE	544	chr16	-	28873486	28874661	CATCAAGGCCAGTTAGAGAAATCGAGAACAATTAAAGTACGGAGGGTAGTTGAAAGCATG	intronic antisense
764	ASHGA5P046158	6.07e-10	9.7e-08	3.15713	uc004dgl.1	BC015977	UCSC_knowngene	271	chrX	-	46185713	46187080	TTTTCCTGAGAGTCTCTAAGTGACTCACTGCATCACGTAAAACTAAGAAAAAGGATGTCC	intergenic
765	ASHGA5P015960	4.83801e-06	6.7743e-05	3.1555	ENST00000425214	CCDC144B	GENCODE	576	chr17	-	18494172	18507053	TTTATGAGAATTTTATGTTGCTGATGAACAACTTAGAATGGAGTATAAAGATTGATTGCA	intergenic
766	ASHGA5P049307	3.21689e-05	0.000291203	3.15171	ENST00000500612	RP11-510M2.2	GENCODE	2793	chr16	+	71496180	71499844	CTCTCTAAATAACCACAAAGCTCCTACTCCTACTTCAGACATATCAGAAAAATGAGATAA	natural antisense
767	ASHGA5P037397	1.08566e-05	0.00012541	3.14929	ENST00000413645	AP000473.5	GENCODE	550	chr21	+	18003145	18012952	GCCCTATTATGGACATCTAGCAAACAATGATACATCAGAAAAGGAGATGTGCATAAATTT	intergenic
768	ASHGA5P017638	0.000301258	0.00173604	3.14695	ENST00000444042	CYP4A22-AS1	GENCODE	921	chr1	-	47562324	47644943	AACCTCTCAGAGTGAACTGAATTGGATGCAAGATCACGGTGCGTCAGAGCTAGCAAGATC	intronic antisense
769	ASHGA5P058609	1.06251e-05	0.000123185	3.1397	uc011abu.2	BC071797	UCSC_knowngene	1202	chr21	+	9711934	9769227	CATTTCTCATATCAGCTCTCGAGTCCACGATGTTGGAATTTCTGATGAATCTGCAGTCAG	intergenic
770	ASHGA5P044116	0.000119312	0.00083035	3.13905	uc003wtj.3	AK094525	UCSC_knowngene	3352	chr8	-	10713594	10716946	AACAAGCCAAAAGTTGTTTTCTTTACCTTTTTCCTCCATGCACCATGATTTCAATGATTG	intergenic
771	ASHGA5P028097	0.00352423	0.0126262	3.13841	ENST00000547590	RP11-150C16.1	GENCODE	555	chr12	+	59314419	59458019	CAGAAGTCTCCACTACGTCGTGGGAAACATATATCAAATGGAGTTGAAAGGCAAAAGGAA	bidirectional
772	ASHGA5P047630	9.91206e-05	0.000717746	3.13635	TCONS_00013572	XLOC_006223	LincRNAs identified by Cabili et al	403	chr7	+	123175305	123175887	TACACTTGTGAAACGGCACAGCTCTCTAAACCAAACACTGACAGCAGTTTAATTTTACAG	intergenic
773	ASHGA5P008178	0.00110623	0.00494106	3.13572	NR_028140	FLJ42289	RefSeq	1584	chr15	-	100884661	100890438	GTCGGAAAAGGGGTCTGGCACTCTTCCTCATGCTTACGAGATGGCTGCTGGAATTCCAGG	intergenic
774	ASHGA5P038580	0.000414184	0.00223437	3.13255	ENST00000425330	RP11-385J1.2	GENCODE	508	chr3	-	178466076	178578193	CCTTCTTAGGACATAAGCAGGAAATCTTGATACAGGAATCAATAAGGGGAAAGAGAAAAT	intronic antisense
775	ASHGA5P025533	0.00144561	0.00613487	3.13157	NR_003307	SNORD115-15	RefSeq	81	chr15	+	25451408	25477615	GATGAGAACCTTATATGTTCTGAAGAGAGGTGATGACTTAAAAATCATGCTCAATAGGAT	intergenic
776	ASHGA5P016692	0.00232363	0.00896622	3.12431	ENST00000433036	AC133528.2	GENCODE	415	chr2	+	242629828	242633704	GGCCTGATAGACAAAATACATGAAGACCAGTTTCTACACAGAGAATCACTAAAAGATGGC	intergenic
777	ASHGA5P019471	1.7758e-06	3.1733e-05	3.12322	NR_028500	LDHA	RefSeq	2108	chr11	+	18415935	18429765	CTTAATGAAGACTATAATGTAACTGCAAACTCCAAGCTGGTCATTATCACGGCTGGGGCA	exon sense-overlapping
778	ASHGA5P040608	1.1208e-09	1.42e-07	3.12061	NR_046368	HP07349	RefSeq	457	chr5	-	108063525	108063962	GTTGTGGGGTTGAATCCTTGCCGTGGTTTTGTAAGAATTAAATGAGATAATGAACGCGAA	intergenic
779	ASHGA5P046248	8.27169e-05	0.00062318	3.12035	ENST00000456187	PABPC5-AS1	GENCODE	426	chrX	-	90669876	90689998	CAAAATGTAATAATGTGAAAGAAGAAAACTCTAGGAAGAAACTTCAACAGTAAAATGAAA	intronic antisense
780	ASHGA5P023186	1.61672e-05	0.000171727	3.11606	uc002kmi.3	BC094703	UCSC_knowngene	2250	chr18	+	3603735	3608323	CTGCAGTGAAGCATCAGAAAAGTATAGTAAGAAGAAACTGAATTTGAAGTGGATTCTTAC	intronic antisense
781	ASHGA5P025986	1.20655e-06	2.423e-05	3.10699	NR_047691	PIGT	RefSeq	2206	chr20	+	44044706	44054885	GCCCCATCAGTGTGGATAAATCTTGGAAGGAGCTCAGTAATGTCCTCTCAGGGATCTTCT	exon sense-overlapping
782	ASHGA5P032958	0.000165972	0.00108357	3.10436	ENST00000439136	AC087294.2	GENCODE	487	chr17	+	21117643	21133348	CATCTCCATTTGATCCCATCATAAACCTCAAGAAAAGTAAAAAGCATCATCATCTTAGGA	natural antisense
783	ASHGA5P036629	0.000173774	0.00111843	3.10427	NR_015406	LOC149837	RefSeq	3591	chr20	-	5479217	5485242	GGGTCCAAGTTTATGTTCGAAGAATATAAGCATGATTTGGAGACTCCTGATGTTCATATG	intergenic
784	ASHGA5P041907	7.03331e-06	9.03e-05	3.09702	uc003pho.1	AK124950	UCSC_knowngene	1862	chr6	-	74403625	74405743	CACACTTGTCGAAAGGCGTAGTCATGCAAAAATTTAGGCATATGGATTTGCATAGAGATG	natural antisense
785	ASHGA5P044287	0.0195649	0.0501165	3.09693	ENST00000530725	RP11-163N6.2	GENCODE	577	chr8	-	61297146	61429339	GAAGACTTGATTATGTATACACACACAAAAAGAAAGTGTTATCAAAACTGACAAGAAAAA	bidirectional
786	ASHGA5P030387	0.00059489	0.00301177	3.09173	ENST00000507787	HERC2P9	GENCODE	1023	chr15	+	28834637	28836269	AAAGTCGTGTAGGCTGTTAAGCAGTAGTTGATCATGGATACTTACACTGAAGTGTTATTG	intergenic
787	ASHGA5P041994	6.66675e-06	8.6825e-05	3.09041	ENST00000419415	KIRREL-IT1	GENCODE	587	chr1	+	157995339	158000956	CCCCCAACAAAAGTGTTAATTAGACATCATCGGAACAGGGATATTACACAAATGAATTAA	intron sense-overlapping
788	ASHGA5P035247	1.44176e-05	0.000157094	3.08415	ENST00000446595	AL078621.4	GENCODE	739	chr2	-	114286223	114300213	AAAGTCTAATTCATTTCACCAAAAGTGTGACAGAAGGAAACCAAGTACACCATCTCTCTC	intergenic
789	ASHGA5P021512	0.00178472	0.00726734	3.08214	ENST00000533843	RP11-318C2.1	GENCODE	477	chr11	+	8806087	8831776	ACTTCATGAAGGTCAGACATAGCAGCACCAAGAGACAAAACAGACAGTGTTCACTAGGAC	intronic antisense
790	ASHGA5P052599	3.2842e-06	5.0939e-05	3.08212	uc011dkm.2	BTN2A3P	UCSC_knowngene	1906	chr6	+	26422316	26431928	GAAAGTGTGAGAAGCTGATTGGTAGTGAACCTGCTGTTTAACATCACAGTGACTACATTG	intergenic
791	ASHGA5P017441	0.0102742	0.0298544	3.0787	ENST00000441630	AC008074.3	GENCODE	723	chr2	-	64622353	64680932	CCTATGGAAGGTCTCTGGATTTGATGGCAAATGGCAGCAGAAATGTGGAAAAGATCAAAG	bidirectional
792	ASHGA5P057048	0.00873118	0.0261811	3.07759	TCONS_00012247	XLOC_005803	LincRNAs identified by Cabili et al	305	chr6	-	110858793	110869129	TGCATGGGGACAGTTGGGCTCACATATTTTCCCACCGATAGACAAGAGATTACCAGAAAA	intergenic
793	ASHGA5P040901	0.000198107	0.00124401	3.07694	ENST00000514846	RP11-1334A24.4	GENCODE	543	chr5	-	176869803	176871581	GACATGTGGCAGCTTACGTTGGACAAAACGAGTAATAAAAATTGGCTTTAAATATGGAAA	natural antisense
794	ASHGA5P053001	9.16691e-05	0.000675073	3.0768	uc003sxz.3	LOC441204	UCSC_knowngene	1723	chr7	+	26443015	26535986	CAAAATCCCACCAACCAGAGACAGCTATTAATGATTGTGGTATATTTATTGTAAGTCTCT	intergenic
795	ASHGA5P039259	8.87724e-06	0.00010827	3.07661	ENST00000445430	SDHAP2	GENCODE	4208	chr3	+	195384947	195413011	ACACAAGAGATGGCTTTTTGTACATTTTTGTGCTTAACTTACCACTGACTTCTTTTCAAG	intron sense-overlapping
796	ASHGA5P030301	0.000343102	0.00192789	3.07653	ENST00000559955	RP11-461F11.1	GENCODE	369	chr15	-	98058516	98065041	AATAATGCTTTTATATTTCCTGCGATGACCCAATTTGCACTACGATATGCTCCCTTAAAT	intergenic
797	ASHGA5P020736	0.000203938	0.0012762	3.0764	ENST00000519123	RP11-103H7.3	GENCODE	429	chr8	+	127530942	127534596	AATCCATCAGCAGTTAGGTCACATAGGAGAGTGATCAGCATATCTTGGGAGCACAGTAGA	intergenic
798	ASHGA5P020498	0.000336157	0.00189576	3.07468	ENST00000514771	RP11-454P21.1	GENCODE	781	chr5	+	17850367	17929745	GGAAGTGCTACTGATTGTAACAGTGGAAGCAATTTGAAATGAAATACAACACTTAAAGCA	intergenic
799	ASHGA5P057135	0.000165381	0.00108082	3.07063	TCONS_00013640	XLOC_006301	LincRNAs identified by Cabili et al	475	chr7	+	154795153	154806834	AAACCGGAGTCCAGGAACTCATGGAAGGGCCTCTGCACGGAGATTTGAGCAGCCAGAACT	intergenic
800	ASHGA5P023346	0.000335772	0.00189444	3.06806	ENST00000579007	RP11-838N2.4	GENCODE	643	chr18	+	3466294	3478976	ACAGTGATGTGTATGCAGTTCTGTGAAGGAAGCTGCAGAAGAAAAAGGTGAAAGAGGTGA	intergenic
801	ASHGA5P030526	0.00550099	0.0179887	3.06283	ENST00000558061	RP11-227D13.1	GENCODE	1943	chr15	+	48938147	48944213	CAGGCACTGTGTTAAGAGGGAAGTTAGTAATGTTCTTCCCATTTTAGAATTTTGTAACTA	bidirectional
802	ASHGA5P023702	0.000144878	0.000970861	3.06212	HMlincRNA1562+	HMlincRNA1562	LincRNAs identified by Khalil et al	4469	chr15	+	56088155	56092624	TCTGGAAAAAATGCTGCCATATTGTCCCGCTCTGGAGTCCTTCAAGCCTGAATGAAAACA	intergenic
803	ASHGA5P045066	1.84565e-05	0.000190456	3.06161	ENST00000439341	RP5-858B6.3	GENCODE	794	chr1	+	231010591	231014761	CATTAGCCAAAGCTCCGGGACTTGGTTAAAACTTTAGGCAATTAAAAAGACTGACTTATG	intergenic
804	ASHGA5P025918	4.70166e-08	2.128e-06	3.05994	NR_046318	ENC1	RefSeq	3705	chr5	-	73923230	73937249	AGTCGCCACTGCTCTCACTCCATCACTCGATGAGATAATATGAGATTTCTACTTCGGAGA	exon sense-overlapping
805	ASHGA5P036345	0.000759909	0.00367401	3.05925	TCONS_00026289	XLOC_012631	LincRNAs identified by Cabili et al	521	chr18	+	12288321	12291290	TAAACACCAAAATTGTGTTTAACAGAACCAAACAGCGCCACGCACTTGTGACCCTGACCT	intergenic
806	ASHGA5P032724	1.46429e-06	2.8029e-05	3.05792	uc002kes.3	AF075112	UCSC_knowngene	304	chr17	-	80338986	80340511	CCTTTGTGCATATGTCTTGATCCACGCCTGATTTTAAAATTTCAGATAAAATCCTAGAAG	intergenic
807	ASHGA5P023099	0.00158385	0.0066102	3.05127	ENST00000569858	RP11-72I8.1	GENCODE	2598	chr16	+	15188267	15203054	AAATATTAAGTTTCCTCAGACTAGAAGGGAGAGAAATGCACACACATGATCCACCAGCCC	intron sense-overlapping
808	ASHGA5P017128	0.000118674	0.000827324	3.04902	ENST00000437947	RP11-61I13.2	GENCODE	436	chr6	-	39865115	39867847	TAACAAGACTCATCTTTACAAGACTCCAGGAGCTTAGGGTGCAGTGACGAACAGTGTTTG	intronic antisense
809	ASHGA5P032980	0.000375721	0.00206557	3.04755	ENST00000556050	SPAG5-AS1	GENCODE	871	chr17	+	26926150	26933928	GTTGGGTGACCTGAATATCAATTAACACAGTATTATAAAATCCTCTGCATCTGCACTTTG	intronic antisense
810	ASHGA5P028321	1.89102e-05	0.00019419	3.04663	ENST00000539446	RP1-278C19.3	GENCODE	827	chr12	+	120639158	120649315	AGTCACAGAGCTGCTCCCAGTTCACCTGCTTGTGCTAAGAAACAATAAAATACAAATTGC	natural antisense
811	ASHGA5P029727	0.000713169	0.00350418	3.03886	ENST00000554522	RP11-725G5.2	GENCODE	1701	chr14	+	95795920	95801841	TGTGAGAAGTGCTAGCAAAAAAAGACACAAGTATGTCCAGAGAGTCTGAGGTGTATACAG	intergenic
812	ASHGA5P030950	0.00014352	0.000962778	3.03795	uc002dam.1	AX748339	UCSC_knowngene	2128	chr16	-	11029865	11031993	TGCCAGGCCTATTTCATACGCACTCTTCCAACTTTTTCCTGAATTAAAAACAAACAAACA	intron sense-overlapping
813	ASHGA5P046613	0.00151598	0.00638012	3.03413	ENST00000445990	LL0XNC01-250H12.3	GENCODE	632	chrX	+	102752450	102755245	TGAAAGACTCTATGATGTTGAAATTGCACAGAGGGCTGACCTCAAAGAAGGTCACACCCA	natural antisense
814	ASHGA5P045870	0.0100693	0.0293802	3.03184	NR_024475	LOC100216001	RefSeq	1394	chr10	-	4692376	4720262	TTTCCAAAATAAATAAAGAGCAGGCTAGAGGGAAACCTCCAGTCCTTAGAAACCACGGCA	intergenic
815	ASHGA5P040580	0.000238407	0.0014455	3.03068	ENST00000512486	CTD-2154I11.2	GENCODE	809	chr5	-	95036952	95067999	CAGTGTTTTTACTACAATAAGACAGTGATTAATTGTGTCCCACTGGGCACTGTCCTGATA	natural antisense
816	ASHGA5P028264	5.51105e-06	7.4136e-05	3.03024	ENST00000542331	RP11-443D10.2	GENCODE	560	chr12	+	109541771	109545809	GCTTCCACTCTTTCTCTTAAAGGAACTACTAAATACAGTGTCTTGGGTATTTTTCTAAAG	intron sense-overlapping
817	ASHGA5P016533	0.00405462	0.0140864	3.03013	ENST00000431401	RP1-290I10.5	GENCODE	256	chr6	-	10474732	10478735	CTCCCATCAGAGTTCAAACATTGAATTAGTTGTGCAATGGAAGGAGTATTACCAGGACCC	intergenic
818	ASHGA5P028042	0.00206627	0.00816456	3.02872	ENST00000547177	RP11-968A15.2	GENCODE	735	chr12	+	54656398	54672847	ACTGGGCACATGGATTACATAAAACAGAAAAGGGGTTGTAAGTATGTGATTATGACTAGA	intronic antisense
819	ASHGA5P058158	0.000685909	0.00339525	3.02714	TCONS_00027153	XLOC_013194	LincRNAs identified by Cabili et al	489	chr19	-	781013	789792	ACGATGGACATGAAACAGGGTTGACGGAGGTCGAAGGAGCACATGTCTGCTTGCAGGGCA	intergenic
820	ASHGA5P018111	1.49364e-06	2.8392e-05	3.02187	ENST00000449537	AC004540.5	GENCODE	727	chr7	+	26438232	26439183	TCACGCCGCGAGAAACCCAACACACAGCTATTCTGTCAGGCTGCCGAGAAAAGGCTGTTC	intergenic
821	ASHGA5P051236	0.00115265	0.00510793	3.01508	ENST00000538634	LL22NC03-86G7.1	GENCODE	1655	chr22	+	22292608	22294263	ATTCGGAAAGGTCTGTCTGTAGCAGCTGTGAAACTGCTTCGTGGGCCAGAGCAGCAGCAA	natural antisense
822	ASHGA5P037057	0.00402112	0.013995	3.01439	ENST00000423733	RP3-511B24.5	GENCODE	498	chr20	+	39809095	39825427	CATTCAAAGAGGTCAGATTTGTGGGCAGGCAAGAGCTCAGGAATGAAGAACCAAAAAGGA	natural antisense
823	ASHGA5P058333	9.95205e-05	0.00071982	3.01436	uc001gxr.3	PTPRVP	UCSC_knowngene	885	chr1	+	202155683	202158577	ATGCCATGGAGAAGGTACCTCATCCAACTCTAGGTCAGTTGCAGCAAGGGTGCGACCCAG	intergenic
824	ASHGA5P030683	0.0277422	0.0662177	3.01393	ENST00000569846	RP11-160C18.2	GENCODE	568	chr15	+	78952985	78996226	AACCTGGTTGAATATGGAGTTGATTTGTCTGGCCAGAAAGCTGTACAGCTTGACCAACAG	intronic antisense
825	ASHGA5P021115	0.000512671	0.00266799	3.01258	ENST00000525473	ZNF705E	GENCODE	339	chr11	-	71518636	71529284	CATACTAAAGGAAATCCCACTTCCAACTGGATGTCTGGATGAACTACTGAAAGCTGCTGA	intergenic
826	ASHGA5P039723	0.000784042	0.00376483	3.00795	ENST00000511846	WWC2-AS1	GENCODE	404	chr4	-	184154780	184161787	AACCGTGTATGATGGCTAATAAATGGAATTGGCCATCAGAAACGAGATGGCTAAACACAA	intronic antisense
827	ASHGA5P043342	0.000239436	0.00145035	3.00692	ENST00000429067	AC018642.1	GENCODE	2043	chr7	-	130994502	131012535	CCTTGACACTCAGATTTTGATCATCAGTGCTTTCAAAAGGAAAGATTTTTGATCAAAAGG	intronic antisense
828	ASHGA5P039656	0.0038335	0.0135127	3.00001	uc003ine.3	BC039551	UCSC_knowngene	1124	chr4	-	153855667	153857989	AGGTTTTTCCAACTCTCGATCTCCCAGTATCCCAAAGAAATACCTTCTGATTTCAAACTG	intronic antisense
829	ASHGA5P015984	0.0122593	0.0342106	2.99928	ENST00000425438	MLLT4-AS1	GENCODE	311	chr6	-	168224789	168225454	GATGTCCAAAGACATGAAAATTTCCAGGCTGACAAATAATTTCGCTGTCATCGGTCAAGA	intergenic
830	ASHGA5P019847	0.000171955	0.00111061	2.99829	ENST00000504068	RP11-434D9.1	GENCODE	793	chr5	+	67089045	67101063	AGCTTTCCCTGAAACTTTCTGAGATGCAAGTGGGTGTTAAATGGTTCAGCAAAGCCAAGC	intergenic
831	ASHGA5P033462	5.00408e-05	0.000414998	2.99824	ENST00000580242	RP11-720L2.3	GENCODE	492	chr18	-	316739	317366	CACCTGAGTTGCTACTTACTACTATGAGAAGATAGAAAATGTTTTTTCCTCTAAACAGCT	intergenic
832	ASHGA5P014679	0.00559073	0.0182076	2.99478	ENST00000412410	AC073071.1	GENCODE	388	chr7	-	109162037	109237223	GAACACAAATTAGCTGGAGGAAAAGAATAAAAAGGAAATTACTCTGCCCAGCTATCAGCA	intergenic
833	ASHGA5P038276	0.00388915	0.0136594	2.99435	NR_024615	ERC2-IT1	RefSeq	2264	chr3	-	55691242	55693497	AAAGCAAAATGGAATAGATCGGAGTAGAGATCTGCCAAGTTGCCTTACAGAGCCAGGACA	intron sense-overlapping
834	ASHGA5P036785	0.000431527	0.00231263	2.99238	uc002xjn.1	BC035080	UCSC_knowngene	1459	chr20	-	39726968	39766640	CATAAGAACCAAGAAGAAAGTTAAATGAACCAATCACAATTCCAGAATTCTCCAGAGGTT	natural antisense
835	ASHGA5P045335	0.000790313	0.00378633	2.99196	ENST00000433644	RP11-435O5.2	GENCODE	739	chr9	-	98177780	98189078	TTTCAATAGTCCAGACAGCTTCCAACCAAAGATGTGGAGGCACAATCTTTGCCTGGTAGA	intergenic
836	ASHGA5P040812	0.000698487	0.0034454	2.99143	uc021ygc.1	LOC729421	UCSC_knowngene	1090	chr5	-	151149353	151150984	CATGGCTACCCTTCACTTTTGGAGGGAGTTTTAAGTGATACAGATCTTTTTGCCAAGCAA	intron sense-overlapping
837	ASHGA5P000067	2.32858e-06	3.9271e-05	2.99015	AL080072		NRED	1322	chr1	+	92654807	92656269	TTGCATTCTAACAGGTTATGATGAATGGAAAGCTGATGGTTCCTGGTTGGAAAAAAGATA	intergenic
838	ASHGA5P054672	0.0105442	0.0304505	2.98719	uc001lwp.2	KCNQ1OT1	UCSC_knowngene	59461	chr11	-	2661767	2721228	ATGACTTAGATCCCATCCCACTTTCATGTTTTATATTGCCAAAACTCTGCTTTTGGGAGA	natural antisense
839	ASHGA5P031319	0.00428306	0.0146373	2.98697	ENST00000569677	RP11-679B19.2	GENCODE	335	chr16	-	79246607	79263350	GCATCTACGAGAAGCGCTTTATTAGAAGCGCTTTATTTTTCCTCTAGATTTCTTTTCTAA	intergenic
840	ASHGA5P039339	0.000329058	0.00186153	2.98248	ENST00000503163	RP11-22A3.1	GENCODE	316	chr4	-	12949197	12950294	CTAAATTCTGGCAGTATTTTCTTCTTGCATGGTTTTGGAAAGTAGGCGTTGTTACCTCAG	intergenic
841	ASHGA5P017429	7.65566e-06	9.6052e-05	2.98223	uc004exm.3	MGC16121	UCSC_knowngene	648	chrX	-	133678456	133680653	GAGCAGGTAGAATGTAAACAATTGAAAAAAATCCCTTCCCAATCAGAATACCACCCACAG	intergenic
842	ASHGA5P041819	0.00411384	0.0142045	2.97855	uc003ooz.1	AX747174	UCSC_knowngene	3053	chr6	-	39851291	39854344	GAGTCACCCCTGTCCTTGGCAGCCATCATTGGAAGATTAAAGCCATACATATTTTGGATC	natural antisense
843	ASHGA5P005776	1.223e-09	1.52e-07	2.97845	ENST00000309874	RP11-23P13.6	GENCODE	2900	chr15	+	42184990	42188133	ACCTAACCAGTAAGACCCTCAGCCCATGGAGTCCTGTGTGATGTTGTGAGCGTGGGAGGA	natural antisense
844	ASHGA5P040949	2.73963e-05	0.000259079	2.97787	ENST00000511693	RP11-259O2.1	GENCODE	718	chr5	+	1933976	1959290	CCATGTGTATTCTGTAGTAGGAGTTTGCATTCTGAAACTGGTCTTTATTAAAGAACAAAC	intergenic
845	ASHGA5P038874	0.000204501	0.00127783	2.97672	NR_038221	LOC201617	RefSeq	2700	chr3	+	72200407	72223490	AGTTCTAGATCCATCCCTTGCAGCTGTAATGAAAGCAGGATTTTAATAAAAACTGGATAC	intergenic
846	ASHGA5P017830	0.00400035	0.0139546	2.975	ENST00000446205	AL583842.3	GENCODE	340	chr1	+	142618768	142621059	GTCCCTGCGGGGAAGAACTCACTGATTCCGCGAGGGAGATGGCATAATGGATGATGGTCT	intergenic
847	ASHGA5P042618	0.000237631	0.00144148	2.97073	ENST00000400982	RP11-466F5.5	GENCODE	1216	chr1	+	165667986	165679205	GTTGCTGTTGGGGTTATATATTTTTGCTCAACATATTTGGAAACTAAAGTTTCTGGAGGA	natural antisense
848	ASHGA5P058590	0.000308516	0.00176901	2.96526	uc010nxz.1	LOC100130417	UCSC_knowngene	436	chr1	-	852952	854817	ATCTTCAGCAGACATTGCCCAGTGCAAGGGGAGTCCAGCCCCAGACTGACTTTCTGAGGT	intergenic
849	ASHGA5P017979	0.00168914	0.0069541	2.96512	ENST00000447876	AC018730.1	GENCODE	607	chr2	-	105424030	105469641	TAGATTCATCCTGCCTGAAAATCATATGCGTGGTTTTTCCTGTTTCCTGCTCTGTAGCTG	intergenic
850	ASHGA5P047622	0.00304377	0.0111961	2.96463	uc001kof.1	AX746617	UCSC_knowngene	2157	chr10	+	99378561	99382516	ATATGGCTTCACATTAGTGGTGAAAGGATGTATTGAAGGATATTCTATAAGAAGGGAACT	intronic antisense
851	ASHGA5P048212	1.46053e-08	8.75e-07	2.962	ENST00000567594	RP11-856B14.1	GENCODE	614	chr11	-	65337130	65337744	TTGCGACCATTAGGCTCTTCTTGGGTGAGTTGCAAGTTAAAATTACCAGGGCTCTCTGAA	bidirectional
852	ASHGA5P045836	0.000281764	0.00164464	2.95992	ENST00000366188	RP11-370F5.4	GENCODE	410	chr9	+	95909321	95910838	ATACTGGAATTATCATTAGATTACCATACATCTGGGTGAGGAGCAGAACAGAGACATAAG	intergenic
853	ASHGA5P019558	0.015015	0.0403728	2.95904	NR_045785	CHIT1	RefSeq	2396	chr1	-	203185206	203198860	TCAGCTGTAGGTCTTCCATACTTGCCTTCAGGCACCCCAGAGCTTGAAGTTCCAAAACCA	exon sense-overlapping
854	ASHGA5P043741	8.346e-10	1.18e-07	2.95788	ENST00000404291	STAG3L1	GENCODE	496	chr7	+	74995622	75024657	AGCCCAGGTGCCCAGAGGACTTTCTTCCAGCTTCTGCTGTCCTTCTTTGTGGAGAGCAAG	exon sense-overlapping
855	ASHGA5P027668	7.11952e-06	9.1038e-05	2.95689	TCONS_00017369	XLOC_008233	LincRNAs identified by Cabili et al	285	chrX	-	128809963	128812358	TTGTGTTTGTCTTGGGGACTGTTCCGTCAGAATGAGCAGCTTAAAAAATGTCGCCTGTGA	intergenic
856	ASHGA5P018893	1.7373e-05	0.000181853	2.95631	ENST00000484945	FAM86DP	GENCODE	2238	chr3	-	75470710	75484108	CTCCTGCCACAGCTTAGAAGCAAAGTTAAGAGACTCATCAGATTCTGAGCTGCTGCGGGA	intergenic
857	ASHGA5P033025	0.00089486	0.00417341	2.95486	TCONS_00016085	XLOC_007475	LincRNAs identified by Cabili et al	1897	chr9	+	98527279	98538745	ATCATGAGGCTGCCTGATAAAAGAGCCTGCATGAAGGAAAGCTGAATGAAGAGGTGGAAA	intergenic
858	ASHGA5P033688	0.000270441	0.00159694	2.95266	ENST00000581677	RP11-705O1.8	GENCODE	2131	chr18	+	268147	270278	CCTGAAATGTTACAGGCTTTTTAAGAATCAGCAAGATCATTCAGGTTTGGTTGTATACAT	bidirectional
859	ASHGA5P043689	1.12399e-06	2.2899e-05	2.9526	TCONS_00018127	XLOC_008402	LincRNAs identified by Cabili et al	780	chr10	+	16569513	16581773	TAAGATGCTAATGATCCTGGGAGTTTTAGCCTTTTGTTGCCTGCTGCTGCGGTGTTTGAA	intergenic
860	ASHGA5P023335	0.000859527	0.00403436	2.94922	ENST00000578664	RP11-838N2.4	GENCODE	440	chr18	+	3467238	3478974	TCTGCAAAAGGAGAAGCTGGACTCAGTTCTGTGAAGGAAGCTGCAGAAGAAAAAGGTGAA	intergenic
861	ASHGA5P031549	0.00354025	0.0126729	2.94915	ENST00000575792	RP11-65J21.3	GENCODE	362	chr16	+	14417150	14420141	ATAAAACCAAACAACTTGGAACCGCTCCAAGAGAGGGGATTAAAGCAACATGTTATTCTG	intergenic
862	ASHGA5P046353	1.82057e-07	5.86e-06	2.9484	ENST00000435597	RP11-1114A5.4	GENCODE	3018	chrX	-	135923089	135929956	CAGTGCTGAGAAATATGAGGTTCTGACCTAGCCAGAGTGGAGAGAACTTTTTAACATCAT	intergenic
863	ASHGA5P038836	0.00949802	0.027985	2.94455	TCONS_00023867	XLOC_011177	LincRNAs identified by Cabili et al	328	chr15	+	24592557	24603204	GATACTCACATGGTGGAATTATATTGCCTTTGGCCAACCCTAAAGCCATCAAGATAGCAG	intergenic
864	ASHGA5P049073	0.011701	0.0329573	2.94128	ENST00000570945	RP11-65J21.3	GENCODE	651	chr16	+	14396144	14420210	GTTATTCTGAGTGATTGCTTAATTTATTGAGCTGCGGCTGGATCTGTAATGAAATACAGC	intergenic
865	ASHGA5P038288	0.00766835	0.023603	2.9395	ENST00000469148	RP11-204J18.2	GENCODE	352	chr3	-	62246539	62248415	CTGATCTGTTGCCTCTGTTTCACTTTTCCAATTAGATGAATGACAGAAACAAAAAATCGT	intronic antisense
866	ASHGA5P000042	0.040628	0.0894281	2.93793	AK024231		NRED	2616	chr17	+	42023508	42027711	AAATACTCCAAGCAGGAGACCAGTTACCATTTAAGTCCAACTACCCCAAGAATATCAGAC	intergenic
867	ASHGA5P045321	4.79799e-08	2.138e-06	2.93538	ENST00000423380	RP11-305L7.1	GENCODE	815	chr9	-	93867238	93869586	GAATGGGAACATTGTCTGTCATCCCTAGACTGCATTAAAGACCTAAACTGCTTCCATTTA	intergenic
868	ASHGA5P040711	0.00236976	0.00910539	2.93517	TCONS_00022111	XLOC_010719	LincRNAs identified by Cabili et al	2187	chr13	-	110687618	110698421	TCAAAGTGTATAGAGAGCAGTCAAAAGATCGCCACAGTTGCTCTGTGTTTTCGTGAGCCA	intergenic
869	ASHGA5P032083	0.000792455	0.00379516	2.92611	ENST00000381977	RP1-59D14.3	GENCODE	490	chr17	-	2310306	2319143	GTAACTTTCCAAAAGCCAGGAGTAATACCAAGATCTCCAAGAAAGCAGCTGGGTTCAGAA	intergenic
870	ASHGA5P054812	1.6963e-05	0.000178412	2.92156	TCONS_00008508	XLOC_003993	LincRNAs identified by Cabili et al	209	chr4	-	78075945	78077856	GAAGAAAAGACTGATCAAGTTGTCCAAGATGGAGCCCTTTATCCACGTTAGTCCACTTAT	intergenic
871	ASHGA5P018758	0.00403449	0.0140338	2.91885	ENST00000457352	NSUN5P2	pseudogene	1482	chr7	-	72419135	72425256	AGATGCCGACTGAGTGGGGGCATGCTTGGGAGGCGCAGGATGGTACTGGCACATCTAACA
872	ASHGA5P045631	1.5795e-05	0.000168926	2.91869	uc003zmh.1	BX648501	UCSC_knowngene	2421	chr9	+	16216805	16219226	AAGAATGACAGAAGTTTATCCAAGGCCATACATCAGACCAACGGTCTCAAACATGGGACC	intronic antisense
873	ASHGA5P017614	0.00134875	0.00580393	2.91743	ENST00000443759	CTB-161A2.3	pseudogene	179	chr7	+	99935819	99936509	TGAAAACAATGGTGGCAAAACATCCAAAGAAAGGGTCCCAAGTGGTACATCGTCATAGCT
874	ASHGA5P043978	0.0189439	0.0487722	2.91683	NR_033897	EPHA1-AS1	RefSeq	5034	chr7	+	143104905	143220540	CCATGTAAAATAATTTTACGGGTAGATTTTACCAACGTTTCAAGAGAGACATGATTCCCA	intron sense-overlapping
875	ASHGA5P031322	4.82743e-07	1.1965e-05	2.91615	ENST00000566729	RP11-345M22.2	GENCODE	772	chr16	-	79784588	79804460	GTGTTTTCTGATAATGCATTTTGGTTAAGAGCCAAAGAGTCTTCACTAAACATTTGCTGA	intergenic
876	ASHGA5P043400	0.0125372	0.0348632	2.9148	uc010ppi.1	EU250746	UCSC_knowngene	1768	chr1	+	200380927	200444641	GAAGGTAAAACGGTTCAGTAAATTATGGATTTACAAATAAACTTGATTCTAGGGCCTTGG	intergenic
877	ASHGA5P032737	0.00416666	0.0143556	2.91385	ENST00000572998	RP11-1260E13.1	GENCODE	307	chr17	+	171307	172244	GAAGAACTACAATATGGTGGGGGTGGCAGATGCCAATCAATGACACAGATACCTATTTAA	intronic antisense
878	ASHGA5P052812	1.23881e-05	0.000139415	2.9134	NR_033557	LOC100422737	RefSeq	1387	chr6	-	107165326	107235300	TATATAGACTTTTAACATTTTTGTATGTCAAGATGGACTTTTCCTCATACCCAGCCCCTG	intergenic
879	ASHGA5P029703	0.000545571	0.00281095	2.91173	ENST00000556328	RP11-507K2.3	GENCODE	718	chr14	+	89017940	89018837	TCTCTGGGAACAAGACAGCGTAATGAGCATCGTGAGAAATCTAAGACGAATCCCTAAACC	intronic antisense
880	ASHGA5P032967	8.18924e-08	3.164e-06	2.91105	ENST00000578792	RP11-744K17.8	pseudogene	436	chr17	+	21934957	21935393	GCACCCATTTTACTACCAGATTTGGAAGGAACAAAGTTAAGTAATTTCCAGGATAAGTAA
881	ASHGA5P039779	0.000859775	0.00403436	2.91019	ENST00000505731	NOP14-AS1	GENCODE	1999	chr4	+	2936625	2949400	GTTTCTGCAGGAACATGAATTGGGAAATAAAGCTCAGTGCTCAGCACCAAGAACAAAGCC	natural antisense
882	ASHGA5P058161	9.05433e-08	3.405e-06	2.91018	TCONS_00027184	XLOC_013222	LincRNAs identified by Cabili et al	1551	chr19	-	10762549	10764550	AGGCACAGAAGGGTCAGGTTGGCCATCCGCAGGCGTAGTTGCTAGGAAGGTTTGACAGAT	intergenic
883	ASHGA5P042619	0.000942513	0.00434468	2.90573	ENST00000423121	RP11-466F5.8	GENCODE	2150	chr1	+	165738165	165744413	TAGAAATAGGATTGACTAAAGTGAATCCACGTTGTATCTGTAAGAGGTCCATCGTTGAAC	intronic antisense
884	ASHGA5P051588	2.19e-11	1e-08	2.90523	uc003dpr.4	FAM86DP	UCSC_knowngene	2106	chr3	-	75470702	75484266	GAAAATTCTGGCTTTGTGCAGATAAAAAAGTGTGTATCAAGTATGACGTTCCCCCAATGT	intergenic
885	ASHGA5P046347	4.11413e-06	5.9943e-05	2.8992	ENST00000430820	DDX26B-AS1	GENCODE	398	chrX	-	134654007	134654599	GCCTTGCATTCCACATATATCTACTTAGAAAGGAAACTAAAGCTTAAACACAGTTACAGT	natural antisense
886	ASHGA5P020435	0.002227	0.00867256	2.89763	ENST00000513480	CTD-2127H9.1	GENCODE	583	chr5	-	38736156	38845870	GGAACCAGAGGTTTTCAGTGATGTTGAGAGTCAACAGGAAATTAATCAGCAAGTAGAAAA	intron sense-overlapping
887	ASHGA5P043392	3.686e-09	3.31e-07	2.89366	ENST00000468266	RP11-61L23.2	GENCODE	463	chr7	-	143508482	143533799	CTAAACCTTAAGCAGTGTCCCAATCCCCATCTTCTTGAAAGTACCTGATGAAGAATGGAG	intergenic
888	ASHGA5P057100	0.0017104	0.00703024	2.88972	TCONS_00013320	XLOC_005968	LincRNAs identified by Cabili et al	3042	chr7	+	2482208	2488305	AACAAAGACAGAGCTGCTTCCCTCCTGTTGGGTCTCTGGCGGACAGTCAGATGGGGAAAG	intergenic
889	ASHGA5P038705	1.57468e-06	2.9301e-05	2.88646	ENST00000428681	AC093495.4	GENCODE	476	chr3	+	14186319	14187021	ATACATTGCTCTGTCACCTGGGTGTTATTACCGACTTAAATCTGAAAGAAGCTGGGCACG	natural antisense
890	ASHGA5P016660	0.00186522	0.00753943	2.88269	ENST00000432673	RP11-390P2.4	GENCODE	917	chr6	+	139013684	139018425	AGCGCGACAGGGTTGTTATGAGGCTCAAAGGAACGGCTGCTGTGAAAAAACATGCTTTGC	natural antisense
891	ASHGA5P017246	0.000923983	0.00428999	2.87647	ENST00000439302	BX571672.5	GENCODE	1163	chr1	-	143211527	143272754	CATTTCTCATATCAGCTCTCGAGTTCACGATGTTGGAATTTCTGATGAATCTGCAGTCAG	intergenic
892	ASHGA5P058237	9.88138e-05	0.000716344	2.87455	TCONS_00028435	XLOC_013788	LincRNAs identified by Cabili et al	663	chr20	-	48779906	48782695	ACGGGCATGCAGGGCTCCTGGATGCTGTGCTGAAAACACCACGTACAGAAGCCAGTCTAA	intergenic
893	ASHGA5P046080	4.22366e-06	6.0959e-05	2.87344	uc003jaj.2	LOC100233156	UCSC_knowngene	1315	chrUn_gl000218	-	62408	97454	TGGTGAATTTCAGCCAAAGTGGCCAAAGAAATCCTGTTCCTGTGATAATGACGCCATCAG	intergenic
894	ASHGA5P043103	3.13399e-06	4.9151e-05	2.8704	ENST00000449307	GS1-124K5.11	GENCODE	4742	chr7	-	65993424	66007536	TTTAATCTTGAAAACTCTGGGAAGAGCTCACTTCTGTTTAGGAGGCTGCCTTGGGAACTG	intergenic
895	ASHGA5P026255	0.000153966	0.00102257	2.86997	ENST00000533591	RP11-266A24.1	GENCODE	685	chr11	+	23186732	23224707	TTGTACTCATATCAGAAGGCAATCAAAGAACATACACATAATATACATTCTATTATAGAG	intergenic
896	ASHGA5P057883	0.000899237	0.00418939	2.86888	TCONS_00023302	XLOC_011171	LincRNAs identified by Cabili et al	404	chr15	+	24356506	24358424	ATCTGGATTCATGATACAGAGAAACCTGAGTACTGATGACACTAGCAGTCCAGCCTGCAT	intergenic
897	ASHGA5P047192	0.00176948	0.00721688	2.86773	ENST00000451601	RP11-809C18.3	GENCODE	1657	chr10	+	674577	677195	GGGGTCAGATATCAATGCTAACATTTGTGCTGACTCAATTAATTCAAACGATTCACAAAA	intronic antisense
898	ASHGA5P044147	0.000586536	0.00297899	2.867	NR_024040	CSGALNACT1	RefSeq	3968	chr8	-	19261671	19540261	GGATAACCAGCTAAGTGATTTCACCAGCTTGTTTTAAACATAGAAAATCCTACTGTCTAA	exon sense-overlapping
899	ASHGA5P028834	0.0028557	0.010649	2.86508	TCONS_00009771	XLOC_004979	LincRNAs identified by Cabili et al	295	chr5	-	123676149	123676863	TGGACCAGTCACTTCGCACAGTTCAAAAGATGCTGTCTTCTCTCTGGGATATGCTATCAA	intergenic
900	ASHGA5P017434	0.000135959	0.00092419	2.86449	ENST00000441539	AC007566.10	GENCODE	395	chr7	+	92119398	92120893	ATAACACAGGAACTGTATAATGATGACTGCACAAGATACCAAATCAGAAGAGGTTCCATT	natural antisense
901	ASHGA5P039383	0.000402443	0.00218312	2.86437	ENST00000512517	RP11-83C7.2	GENCODE	2059	chr4	-	38422282	38524801	TCAACTTCTTTATACAACAATGGCAGAGAAGTTCTACAATATGGAGTCCTGTGATAAAAG	intergenic
902	ASHGA5P046834	0.00278782	0.0104272	2.86287	ENST00000422807	RP11-445N18.5	GENCODE	535	chr10	-	45659675	45676875	GAGAGTGCCCTGAAATATTTGAAATGTTGAAAAGCTGAACCTACAAATGTCAAAACACAA	intergenic
903	ASHGA5P028365	0.00017231	0.0011112	2.8623	ENST00000539391	RP11-522N14.2	GENCODE	2256	chr12	+	124690773	124693564	TTATCTTGATGCCAAAACAAGAACCAAGGACCCTTTTCCACTAGGAGAACTCTCGGCAAG	intron sense-overlapping
904	ASHGA5P053132	0.000734175	0.00357963	2.85054	ENST00000420642	AC118138.2	GENCODE	950	chr7	+	74765875	74789332	GTTATTTTTAGTCTTCAGCATGGGAAACAATTCTTATGGGCAATGTGGAAGAAAGGTGGT	intergenic
905	ASHGA5P025812	3.72042e-05	0.00032852	2.84549	NR_038210	SAMD12-AS1	RefSeq	701	chr8	+	119633239	119738306	GCAAAGTAATACTTGGGAGAACTATAATACACAGGCATCTCATGAAAATCATCCAACATA	intronic antisense
906	ASHGA5P033520	0.0121694	0.0340045	2.84501	uc021uho.1	DQ575348	UCSC_knowngene	751	chr18	-	11667621	11668372	TAAAGTCAGGCTTGGTTGTAGGCCCCCAACAAGACATAAAACCTGTACAGGTCAAGAAGT	intergenic
907	ASHGA5P032681	0.00016455	0.0010765	2.84419	ENST00000570408	RP11-353N14.3	GENCODE	324	chr17	-	77821856	77823909	AGAAATCCATAGTACTGGAGCTGGTTCAGAGCCCCACGGAATTAACTCGGAATAAAACCA	intergenic
908	ASHGA5P044211	2.76551e-06	4.4416e-05	2.84229	ENST00000519764	RP11-675F6.4	GENCODE	537	chr8	-	38409765	38416538	AAGACATGCAGAGCCAACCACTAACAAAACTGGCAAATGAAATAAATGCCCAGAAACCTG	intergenic
909	ASHGA5P016712	0.000784543	0.00376581	2.84196	ENST00000433290	AC079776.2	GENCODE	400	chr2	-	130680435	130691890	GCTTTGGCCGATGGTAGAGAAGACCGTGGATCACCTGGGGACACAGGTGAAAGGCCTGCT	intergenic
910	ASHGA5P020794	0.00011208	0.000788603	2.84118	uc003xew.3	BC034827	UCSC_knowngene	3172	chr8	-	26236776	26240469	CGTTTATCCTATGTTAATGGCTAGTTACTCTTCAGATGAACTTAAAAATGGACTTGTCCA	natural antisense
911	ASHGA5P044944	0.00357436	0.0127695	2.84063	ENST00000521625	KB-1083B1.1	GENCODE	449	chr8	+	101630808	101632221	AAGTTACCCACATTTCTGCCCAGCTGACTACAAATTCTGGTTTCCATGACCCCCTCTCAG	intronic antisense
912	ASHGA5P031576	0.0116506	0.0328664	2.84039	TCONS_00006668	XLOC_003264	LincRNAs identified by Cabili et al	811	chr3	-	135551401	135559458	GAAAAGTTGCAATCTCTTCAGACCTCTATCATCAAAAAGGAGGCCCAGTGCATTATTGCA	intergenic
913	ASHGA5P021077	0.0138655	0.0378345	2.83638	ENST00000524514	AF186192.5	GENCODE	423	chr8	+	145925737	145932591	ACACGGAAGGATTCCTAGGTCAAAACAAAGCATAAACAATCAACGCCAACAGAAAAATCT	intergenic
914	ASHGA5P040865	0.000356234	0.00197991	2.83513	ENST00000519795	CTB-178M22.2	GENCODE	503	chr5	-	167656587	167659362	GAGCCTTCTACTCTCAGGGATTCCAAAGCATTTGATAAACTCTTTCTTTGTTCCATTGTT	intronic antisense
915	ASHGA5P028234	0.00552396	0.0180411	2.83385	TCONS_00009369	XLOC_004312	LincRNAs identified by Cabili et al	548	chr5	+	21107539	21154785	ATTGTTAAGGCAATTATCCGTGTTGAAGAGAAACACGTCGCTGCTGCTTGCTTGATGTGG	intergenic
916	ASHGA5P058604	2.04717e-07	6.331e-06	2.83356	uc010vhg.2	MTE	UCSC_knowngene	243	chr16	+	56710043	56711676	TGCTCCTGCTCCACTACTCCTGCAAATGCAGAGAGTGCAAATGCACCTCCTGCAAGACGA	intergenic
917	ASHGA5P054814	5.424e-05	0.000441729	2.83273	ENST00000524410	RP11-430H10.1	GENCODE	605	chr11	+	45376921	45387672	CCCTTGGAAGCCAAGAATATGAGGAAGTCTTCTTCCTTCGCGCCTTCTTCTTCCTTACGC	intergenic
918	ASHGA5P027601	0.00820467	0.0249208	2.83204	BX507731		LincRNAs identified by Khalil et al	641	chrX	-	18898412	18899047	TCATGTAGAAAGATATATGCTCTTTGTAGGCATATGGATACAGAAGGTTGCAAAGAAAAG	intergenic
919	ASHGA5P026928	0.0201156	0.0511036	2.83072	ENST00000446631	NTM-IT2	GENCODE	577	chr11	+	131850989	131854555	ATTATCTAGCCCATTTGCTGTGAGTGCATGTTGGGGTGTTTGGCAGTTGGTTTACAGTTC	intron sense-overlapping
920	ASHGA5P027686	0.00592872	0.0191606	2.82823	ENST00000545739	RP11-955H22.3	GENCODE	852	chr12	-	127808699	127824617	ACATTGAAAAGTTTATCCTCACCCTATCTACTTCCAGCAATTTCCTTCCAATTCTATCTG	intergenic
921	ASHGA5P033740	7.43772e-05	0.000573172	2.82707	TCONS_00028653	XLOC_013728	LincRNAs identified by Cabili et al	498	chr20	-	32577407	32579666	AGTAATTGATGACATTGGAGCCAGAAATCGAATGAACCGGGCCCAGTTCAATCCACTTAC	intergenic
922	ASHGA5P035220	4.46829e-07	1.1168e-05	2.82674	ENST00000567491	AC133109.1	GENCODE	1604	chr2	-	109743782	109745386	AGCCATTGGGGCTGAATTTTCATTTTTGTATCCACAGAACTAACACATAAAGTTTACATG	bidirectional
923	ASHGA5P026915	0.000181444	0.00115715	2.82605	BP305238		LincRNAs identified by Khalil et al	583	chr7	-	135585497	135662101	TGAGCTCCAGTGCTGTGAATCTCTGCTTAAAGCACCATATGACATTCACCTGTAATCCCA	exon sense-overlapping
924	ASHGA5P043618	0.00244306	0.00932817	2.82295	ENST00000446024	AC083864.3	GENCODE	482	chr7	+	36069220	36095041	GAAACATTTGAGGAGCTGCACTTACTTGGAATGAGAAAAAGTTACACCCATGACCTCCAG	intergenic
925	ASHGA5P036195	0.00735821	0.0228425	2.8121	ENST00000449714	AC144449.1	GENCODE	1022	chr2	+	150443709	150704747	TCAAAATGTGCCAGAAATTCCAAAACAATCTCAAAGCATTAAAGGCTATGTGCACAAAGT	natural antisense
926	ASHGA5P015505	7.58375e-07	1.6713e-05	2.81183	ENST00000420855	RP11-561O23.6	GENCODE	572	chr9	-	70970104	70972736	ACACTTTCCGGCTGAAGAAAAGAAGAATGGTATTCATGCAGTTCCCATTTTACAGATGAA	intronic antisense
927	ASHGA5P040431	1.59957e-05	0.000170621	2.80956	ENST00000508123	RP11-53O19.1	GENCODE	572	chr5	-	44775795	44808768	TTCACTTACAACACTCAGTATATACCACTTAGAATTATGAAAGTATATCCTGTAGGGCAG	bidirectional
928	ASHGA5P016899	0.00446423	0.0151624	2.80707	ENST00000435493	LINC00323	GENCODE	349	chr21	-	42515068	42519350	AGGAAGTGAGGTGAGGTCACCTGTAGAGGTCATGCTGCGGAGTCCCGAGTCCCTGATTAT	intergenic
929	ASHGA5P056758	0.000761323	0.00367944	2.80197	TCONS_00008419	XLOC_003874	LincRNAs identified by Cabili et al	1944	chr4	-	8160851	8166042	TATTTAGAGATGAAGAAAGGACAAGGAATCCTGCCGCTTTGGACTAGAAAGCCCAGCACA	intergenic
930	ASHGA5P018443	0.00139213	0.00594578	2.80123	NR_015375	FLJ35024	RefSeq	928	chr9	-	2535654	2622373	GAGGAAGAAGGCTCCAAGCTTGATATAGAAGACTATCATATGAACCAGAAAGGGTAACTG	natural antisense
931	ASHGA5P033723	0.00240263	0.0092038	2.80037	ENST00000577694	RP11-945C19.4	GENCODE	371	chr18	+	5887616	5909121	GGGGATGGCTTCTGAGAAAACTTGTATTTATTATTTAAATTTAACCTTCTAGCCTGGGAA	intronic antisense
932	ASHGA5P037791	0.00398153	0.0139145	2.79985	uc002znb.3	DQ570096	UCSC_knowngene	2415	chr22	+	18215565	18217980	GGATACTGCCTGCTGTAAGACCATCCTCTATGGTTGTACTTTAATAAACAGTAATTTTTT	natural antisense
933	ASHGA5P041030	0.000764633	0.00369262	2.79961	uc003jgv.2	LOC643401	UCSC_knowngene	1292	chr5	+	27472398	27485935	TTCACCAGGGTGAGTGAACAAAGGAAATCGGATTTAAAAGTATTCATGACATAGATGCAA	intergenic
934	ASHGA5P015389	2.68948e-05	0.000255289	2.79816	NR_037649	CCNT2	RefSeq	6909	chr2	+	135676391	135716915	GTTAGTAAGAGATCTTTGGGGGATAGCAAGAAACATTTGAGTGAATGTTGTTGAAGATTT	exon sense-overlapping
935	ASHGA5P050409	0.00182633	0.00740822	2.79677	NR_034113	DNAJC27-AS1	RefSeq	4695	chr2	+	25194980	25262563	CGGGGCTGCTGACGTCATCTGCAGGCCCTGGAGACGCGACTGCAGTTACCGAGTTTCTAA	bidirectional
936	ASHGA5P019503	0.000298114	0.00172262	2.79644	NR_046008	ZMAT1	RefSeq	4045	chrX	-	101137259	101187039	AAACCCACAGCTCAGATCTTATTAGCACAGGAATGGCTACCATAACGATATGGAACTAAA	exon sense-overlapping
937	ASHGA5P029458	0.00109698	0.004912	2.79592	ENST00000557615	RP11-298I3.4	GENCODE	1021	chr14	+	23451906	23463360	TAAACCCACAGTCTGCCACAAGAACATTTTAAACCTTCCTCCATGATGGGCAGCAGAACT	natural antisense
938	ASHGA5P022225	3.94516e-05	0.000343595	2.79301	ENST00000552835	RP11-486A14.2	GENCODE	814	chr12	-	93710910	93771492	ATTACACAAGTTCCTTTAAAGATTCTTCACGTTGATATAAGGAGCCTGCTTCCTCATTGC	bidirectional
939	ASHGA5P037181	2.21014e-05	0.000218544	2.79228	NR_045370	LOC100505815	RefSeq	4760	chr20	+	62507483	62512243	CGAACCACAGAATGTTCACATGGTTTTATGCATTTGTTATTTCAGGGAAAATCAAGGTTA	intron sense-overlapping
940	ASHGA5P044052	1.22358e-07	4.38e-06	2.7905	uc003woi.3	AK021933	UCSC_knowngene	2736	chr7_gl000195_random	-	29244	31980	TAGTGTTCCAGCTTTGTTGGAGCGACATTTAAGATGTGGAGCACTTGGGGTCGTTTGAAA	intergenic
941	ASHGA5P036387	0.0160554	0.0425753	2.79015	ENST00000454444	AC007879.4	GENCODE	551	chr2	+	208091672	208093032	CTGCAACAAACTGTGGAATAATCTGACATAGGAAGAGGTGGATGGTACAGAAGAACAATA	intergenic
942	ASHGA5P020200	0.00545251	0.0178584	2.78887	ENST00000509460	CRYBB2P1	GENCODE	701	chr22	+	25851762	25916821	AAGATATACACTGCAGCACCCAGCAAAGATGTGGTACTTGGTGTTGGAGTGTGGATATGA	intergenic
943	ASHGA5P034949	0.0123829	0.0345099	2.78807	NR_038319	LOC100505716	RefSeq	2124	chr2	-	28530557	28533326	TATAGGCTGGATATGGTCACTCTGATGGCTTATTTGGAGGAAGTAATTTTAAATAGGTTT	intronic antisense
944	ASHGA5P016982	0.000174405	0.00112186	2.78744	uc002tjr.4	LOC654433	UCSC_knowngene	2680	chr2	+	113993845	114024580	CACCATGTTAATGGTTATCTTTCTTGAAGGATATAAGTCCAGACACATATACTCACAGAA	intronic antisense
945	ASHGA5P020047	0.005138	0.0170093	2.78516	uc003jcr.3	LOC728613	UCSC_knowngene	2231	chr5	-	1599035	1634120	AGAAGGGAAGCAAAACTTCTGACCTGAGACATCGAAGCAGATAAAAAGCCGCTACACAAA	intergenic
946	ASHGA5P021256	0.0322487	0.0747495	2.77917	ENST00000528794	AF186192.5	GENCODE	570	chr8	+	145926043	145932794	GGAGTCTATAAAGATTCCTAGGTCAAAACAAAGCATAAACAATCAACGCCAACAGAAAAA	intergenic
947	ASHGA5P021495	0.00284393	0.0106097	2.77889	NR_045636	BOLA3-AS1	RefSeq	4064	chr2	+	74375107	74379516	ACACTCCAAGGTGCGGGGACTCGTGGAAGGATTTGATTCGCGCTTGAGAAAGATCGCTCC	natural antisense
948	ASHGA5P014614	0.000148756	0.000992649	2.77683	ENST00000411824	RP11-93B14.5	GENCODE	809	chr20	-	61294370	61298076	GCACCACCAGTGTCGCTGACTTGAACCCCTGCGTCTGCAGCTTAGTGACATCCTGTAAAC	natural antisense
949	ASHGA5P051665	0.011544	0.0326505	2.77578	ENST00000504808	RP11-77P16.4	GENCODE	545	chr3	+	129831494	129838359	TTATCGGGGACACTCATTAAAAATGTGAGTCTGCTCCAGATGGACTCTCTCTCTTTCTGC	intergenic
950	ASHGA5P038088	0.00307811	0.0112995	2.77289	ENST00000449158	GRM7-AS3	GENCODE	444	chr3	-	6763001	6832792	ATGAGCTCCCGTTCTCCATTACTTGATCAATGAATGGAATTTCTGCACTGTTTTGCCAAA	intronic antisense
951	ASHGA5P032540	0.000800516	0.00381789	2.77227	ENST00000507161	RP11-94C24.3	GENCODE	2525	chr17	-	48553179	48555752	GAAAATACCTTAAACCTATGTTCATTTCTTAAAAAGTCAAGAGGAGGCTGCTGCTGCCTT	bidirectional
952	ASHGA5P050028	0.00801436	0.0244483	2.77154	ENST00000577364	RP11-862L9.3	GENCODE	563	chr18	+	74690788	74691509	TTTTATTTCAATATTCAGGAACAGTGTACACTTTCCGTTCAGCCATCGTCACAGCACGTG	natural antisense
953	ASHGA5P049750	0.000410983	0.00222183	2.77117	TCONS_00013599	XLOC_006253	LincRNAs identified by Cabili et al	5358	chr7	+	130610772	130618587	ACTGACATGGCTTTAGGAAACACAGCACATTCACAAACATCTGAAGCCAACTGCAAGGCA	intergenic
954	ASHGA5P028800	0.00816374	0.0248203	2.76822	ENST00000426509	RP11-442J21.1	GENCODE	295	chr13	+	45225947	45275152	GTCACTTTAAGAAGGGAGACTGCCCAGTGAAAGCAGTGGAAAGAAAAAGAGCGTTAAAAG	intergenic
955	ASHGA5P012371	9.16152e-05	0.000675073	2.76602	ENST00000377662	BTN2A3P	pseudogene	1836	chr6	+	26422346	26431843	AAAGAACTTCAGATAAACAGTAAAAGAGGCCAGGATGGAGAAGAACATTCTTACATGCTG
956	ASHGA5P019943	2.75269e-06	4.436e-05	2.76439	ENST00000505637	RP11-53O19.1	GENCODE	220	chr5	-	44777305	44808838	CAGGAAAATGGTAGCTGAGACCAATGATGCTGACCTCCCTCAAAAGCTGCATTTCTGAAT	bidirectional
957	ASHGA5P026927	0.000157889	0.00104207	2.76288	ENST00000421650	NTM-IT1	GENCODE	149	chr11	+	131416555	131443494	ACCACATAAACGAGGAGTGACAAGCACCACGCTGAGCTCTCTGCAAAGCTGCCCAGTGAC	intron sense-overlapping
958	ASHGA5P045994	0.00112827	0.00502547	2.76171	ENST00000372490	RP11-247A12.2	GENCODE	2047	chr9	+	131939049	131972827	AAAGATGGAGATCAAGTTTGAGATGTTGGACGCGTCCGGGGACGAGTCCGGGCAGAAGTC	natural antisense
959	ASHGA5P031531	9.59409e-05	0.000700324	2.76123	ENST00000535363	RP11-27M24.1	GENCODE	533	chr16	+	10623296	10625939	ATGTATTGCTTGAGGGGGTCGATCTCTGGTTCTAAGGTGTTTTGTTTGTTTCCATCGTGA	natural antisense
960	ASHGA5P030532	0.00549228	0.0179655	2.76008	NR_024490	GABPB1-AS1	RefSeq	4139	chr15	+	50646370	50650503	ATCTGGGTTCCGGGGGAAGTGGAATTATTTTTTACCAGCGAAGAGATCAACTTCCACATC	natural antisense
961	ASHGA5P045537	0.000472157	0.00249507	2.75823	ENST00000452377	RP11-399H11.3	GENCODE	527	chr9	-	138096567	138129443	TGTAGAGTCTTGCCTTGGGCCTTCTCGAGTATCCCTTGATGTTCTGCCCAGGAGGAGGGT	intergenic
962	ASHGA5P036625	2.85603e-05	0.000265919	2.7582	uc002wjz.2	BC012193	UCSC_knowngene	1316	chr20	-	3867915	3869231	CTTATCCAGAAGCACAAAGCCTAAAGAATGACAGAGCTTGGACTCCTGAGAAGTTCAGCT	bidirectional
963	ASHGA5P026701	6.9317e-06	8.9358e-05	2.75798	AI263816		LincRNAs identified by Khalil et al	416	chr6	+	109006489	109006903	TTCACTTGAGATTACTTCCCAATTTTTATTCTGTCTTCCAGAGGATTAAAGATGGAACTC	intergenic
964	ASHGA5P020090	3.571e-10	7.1e-08	2.75713	ENST00000508000	CTD-2015H6.3	GENCODE	1151	chr5	-	79778111	79783772	TTTCAACAGTTGGAGCCGCATGTTGAAGTGTGAGGCGTGAAAGGGTATGTCTGATATTTG	bidirectional
965	ASHGA5P014847	6.45705e-05	0.000509488	2.75692	ENST00000413989	AC009228.1	GENCODE	232	chr2	+	24437249	24444375	CCTTTTTGGGAACTGTGCAGAGCGTGTGAAGAATCTCACCACCTCAAGACATTTTTCGAA	intronic antisense
966	ASHGA5P035697	3.5872e-06	5.444e-05	2.75579	ENST00000450695	AC013460.1	GENCODE	518	chr2	+	7561422	7562966	GAGAACACCATCAGATGATCTTTCTGCCCAGAGCCACTATCTGTCCCTAAATATCAGGTT	intergenic
967	ASHGA5P043394	0.000532583	0.00275353	2.75367	ENST00000517565	RP11-61L23.2	GENCODE	2498	chr7	-	143509063	143533301	AGGGCATATTTTGGGGAGTGATGGGATTATGCACACCCTTCAGGTGTCAAGATAAAGAGA	intergenic
968	ASHGA5P035976	3.3593e-08	1.637e-06	2.7535	TCONS_00016340	XLOC_007720	LincRNAs identified by Cabili et al	719	chr9	-	70958613	70966054	CCAAGTACACCATCTCTCTCTTACCAAACCAAAGCTATTGCATGTGCATTCTGGGAGAAA	intergenic
969	ASHGA5P004937	0.0055041	0.0179902	2.75328	NR_037644	C10orf32-AS3MT	RefSeq	2732	chr10	+	104613966	104661655	ATCTGTTGAAATAGAATGACATTGGCTGCACTTCGTGACGCTGAGATACAGAAGGACGTG	exon sense-overlapping
970	ASHGA5P032979	3.18787e-07	8.744e-06	2.75206	ENST00000585189	RP11-192H23.5	GENCODE	298	chr17	+	26900134	26901261	TATTTGCTGTATGGTATGTACTCAAGGCATGAGTCAGGGCTTCTGTACTACCCTCTGATC	natural antisense
971	ASHGA5P046418	0.00160363	0.00668132	2.75045	ENST00000420865	RP11-309M23.1	GENCODE	588	chrX	+	950955	955100	CCGTCAACAAAACGCTAATAAGTGCAGAAAGACTGTTTAGCAGGAAACATGTCCAAAAAA	intergenic
972	ASHGA5P057261	0.00682046	0.0215041	2.74923	TCONS_00015043	XLOC_007125	LincRNAs identified by Cabili et al	234	chr8	-	77396210	77403443	AGTCTCAAAGTTACCATGTGCAGCACAGTCAGGGCAGCATGTGAGAAGAACAACAAGAAA	intergenic
973	ASHGA5P021395	0.00564498	0.0183512	2.74898	ENST00000531654	RP11-163N6.2	GENCODE	1347	chr8	-	61317237	61326489	TCTTTATAACCTGCCTGAGTCGAAGCTGTTAAAGAGGCCAAGAATTCCCAAGCTTTCCCA	intergenic
974	ASHGA5P015905	0.00841152	0.0253795	2.74879	ENST00000424605	RP11-125B21.2	GENCODE	746	chr9	-	2535651	2570754	TGATTCCAAGGCTCCAAGCTTGATATAGAAGACTATCATATGAACCAGAAAGGGTAACTG	intergenic
975	ASHGA5P037280	0.00845809	0.025495	2.74842	uc002ypm.3	BC034802	UCSC_knowngene	579	chr21	-	33678774	33681045	GAAGGGAACATTGGATGTGTCAGCCAATCCTCTAGCACAACAGAATTAACATAAAACAAG	natural antisense
976	ASHGA5P048027	0.0201559	0.0511649	2.74427	TCONS_00013975	XLOC_006613	LincRNAs identified by Cabili et al	482	chr7	-	134102144	134102761	TAAAAGTCTCTTTATAGTCTGTTGATGTTCATGCAGGCACTAAAAGGCCACGGTCGGCCT	intergenic
977	ASHGA5P049054	8.55604e-08	3.246e-06	2.74197	ENST00000574616	RP11-473I1.10	GENCODE	5941	chr16	+	9201097	9207038	TTATAATTTACAGATTGGGGTGGGGAGTGGTATCTACTTCAAATTACTGAAATCTTCCTA	intron sense-overlapping
978	ASHGA5P053316	0.000164779	0.00107744	2.74034	ENST00000444245	AC018642.1	GENCODE	655	chr7	-	131008352	131012489	GTTCAAAACCTGAACACTCTTTTTAGAAATACCTGCTGGAACTACATATATGATTTATGG	intronic antisense
979	ASHGA5P027255	0.00829654	0.0251096	2.73884	ENST00000548382	RP11-161H23.11	GENCODE	2535	chr12	-	49672835	49676768	GTTGCAAAAATAATGAACGAATAAAACTTGAAAGTTGAAAATGAAGCCCAGTGCGGTGTG	intergenic
980	ASHGA5P037866	0.00855058	0.0257248	2.7366	ENST00000415709	CRYBB2P1	pseudogene	538	chr22	+	25851678	25855648	ATGAACAGGCCAACTGCAAGGGCGAGCAGTTTGTGTTTGAGAAGGGCGAGTACGCCCACT
981	ASHGA5P030923	0.000338074	0.00190488	2.73454	ENST00000573220	RP11-95P2.3	GENCODE	318	chr16	-	4230117	4233516	GCGTCACAGGCAATCTTGCTTCTACTACCATAAAAATAGTTTACGTTTCTTAGACACTTA	intergenic
982	ASHGA5P032745	0.000276097	0.00162127	2.73298	ENST00000573877	RP11-676J12.6	GENCODE	585	chr17	+	781141	783333	GTCCAAGCAAATCTTCTGATGTATCAAGTTTGAGGGTGAGGTTTCATTAAAGGAATTTAA	intronic antisense
983	ASHGA5P014604	7.00866e-05	0.00054621	2.7266	ENST00000411746	AL583842.3	GENCODE	649	chr1	+	142619122	142729975	AGTCAGAAATATGGTAGCATGAAGCCAAACGAGGTCCACGTAAAGGCTCTGACACTTTCT	intergenic
984	ASHGA5P016391	0.0015387	0.00645604	2.72479	ENST00000430018	AC135966.1	GENCODE	499	chr3	-	23236560	23244069	GCACCAGCCGGCAAGAGAAAGAGGCCCACTGCAATATGCTGTGAAGAATACATAAGAAGT	bidirectional
985	ASHGA5P056239	0.00962653	0.0283033	2.72098	TCONS_00001337	XLOC_000633	LincRNAs identified by Cabili et al	1130	chr1	+	237076594	237085551	TGTGGAACTTTTGGAAATGAAGATGAGATAAAGGCTTTTCATACCAACAAAAGTGGAAAG	intergenic
986	ASHGA5P027655	0.000370991	0.00204493	2.72081	AI547046		LincRNAs identified by Khalil et al	735	chrX	-	106913408	106920220	GAAGGCTGCCAACACCAGCTGGCTTTGAGAAGCCTGTCTTTCCCTTCAGGAACTTGCTAA	intergenic
987	ASHGA5P049238	2.06896e-05	0.000207913	2.72067	uc010ccl.3	MTE	UCSC_knowngene	172	chr16	+	56710967	56711676	TGCAAAGGGACACTGACAAGTGCAGCTGCTGCTCCTGATGTAGGGAAAGCTGTGTTCCCA	intergenic
988	ASHGA5P017704	0.00641676	0.0204974	2.71984	ENST00000444872	RP11-32B11.2	GENCODE	433	chr9	+	134907272	134952977	CCCACCTTGGCTTGTTTGACCACTTATATGCTTGAAGGAGTTGACTATAGAGAGGAGTTT	natural antisense
989	ASHGA5P056077	2.70887e-06	4.3896e-05	2.71747	TCONS_00027673	XLOC_013222	LincRNAs identified by Cabili et al	1849	chr19	-	10762494	10764553	GAGCTCCGAAGTAAAGGCGCCCGTGACCGAGTGCTTTGTCCTTACAAGCGTGGTGTTCTT	intergenic
990	ASHGA5P036100	0.00119565	0.00526084	2.71419	TCONS_00027715	XLOC_013275	LincRNAs identified by Cabili et al	491	chr19	-	23487808	23493434	TCACACGTGCAAGAAGGTCCAAGGATGAGATTAAAAATTCCACAAAGGTCCAAATTCTAG	intergenic
991	ASHGA5P027902	1.99952e-07	6.248e-06	2.71328	ENST00000500076	RP11-77I22.2	GENCODE	1552	chr12	+	30908007	30933673	TACCTGTTAGAAAGCAATGTGCTTGATACTAGATACTGCCTGTTAAATGTGTTACATGAA	bidirectional
992	ASHGA5P052283	0.00883716	0.0264301	2.7091	uc021yag.1	GUSBP9	UCSC_knowngene	660	chr5	-	69812078	69851200	AACGCTTGTAGGGTTTCACCAGGTAAGCGGTGTTGAACTTTCTGCTTGTGTATTCTCTCT	intergenic
993	ASHGA5P031707	0.000326362	0.00184793	2.70868	ENST00000570183	RP11-586K12.10	GENCODE	2405	chr16	+	32675245	32677854	CCCTGAAATCTTGTGAGTGCATGAACAGGCTATTCTAATGTAAATGAAATTCACACTAAA	intergenic
994	ASHGA5P038659	2.755e-06	4.436e-05	2.7064	ENST00000424493	AC024560.2	GENCODE	1471	chr3	-	197387435	197392628	TCACCGTGAAATATCTTCTGAGACACAACAATCTCCCTGAATTAAAACTACAGACTCTAA	intergenic
995	ASHGA5P011054	0.00143796	0.0061135	2.70638	uc003psr.1	LINC00222	UCSC_knowngene	1573	chr6	+	109080363	109090773	CACCGCTGAGGGTTGGGGGATCCAGCTATCTGTAATTGTGAAGTGAAGAGGATGTGACTG	intergenic
996	ASHGA5P020198	0.0191513	0.0492063	2.70445	NR_027475	AGXT2L1	RefSeq	2014	chr4	-	109663201	109684235	AGCACATCGGTGGGACACTGTCACCCAGGAGTGGTCAAAGCTGCCCTGAAACAGATGGAA	exon sense-overlapping
997	ASHGA5P028571	0.000484437	0.00254616	2.70343	uc001ejb.3	BC053679	UCSC_knowngene	1801	chr1	-	142803223	142888797	AAGGATTTGGAAGGCAGGTAGGCTGATGGTCAAACTGTAGGCCAGCTACTTTGTTAACTA	intergenic
998	ASHGA5P040152	5.47452e-07	1.329e-05	2.70133	uc003ijl.3	BC029578	UCSC_knowngene	1301	chr4	+	144833483	144903605	GGGAGAGAGTATTGGAAGAATATATGCAAATACAATGTGATAATGTGATGTCTTTGTGAG	intergenic
999	ASHGA5P031804	1.76101e-06	3.1519e-05	2.69971	ENST00000563717	RP11-249C24.3	pseudogene	594	chr16	+	56720762	56721681	TTCATCTACCTCAAACAAACAATTCACAGCTCCACAAAAGCTAGATGCAAAATACCAGTC
1000	ASHGA5P015556	0.00103166	0.00467902	2.69834	ENST00000452251	AC135966.1	GENCODE	487	chr3	-	23236560	23244024	TTTAGCCCTGGGGCAAGAGAAAGAGGCCCACTGCAATATGCTGTGAAGAATACATAAGAA	bidirectional
1001	ASHGA5P053623	4.78398e-08	2.138e-06	2.69508	ENST00000429980	RP11-143M1.2	GENCODE	394	chr9	+	72700	88826	GAGGGACTATGTTGTGAGCCTGCGAAAGAAGTTTGTGTGGGGACTGTGGGCAGTGAACGC	intergenic
1002	ASHGA5P027456	1.04272e-06	2.159e-05	2.69376	ENST00000553165	RP1-78O14.1	GENCODE	448	chr12	-	79787451	79897142	AGGATGGAGTGGGGAAAAGAAGAGGGAGGCTGACAGAGAAGCTTAAAGAAATGCTTTCAG	intronic antisense
1003	ASHGA5P048585	0.0136876	0.0374863	2.69282	NR_022010	PAR4	RefSeq	342	chr15	+	25456838	25457180	TAAAATTACCATGCTCAATGATTACGCTGAGGCCCAACCTAGGTGAGAAATTTGGAGGAG	intergenic
1004	ASHGA5P038801	0.0095346	0.0280787	2.68646	ENST00000435419	PRKAR2A-AS1	GENCODE	843	chr3	+	48885004	48885926	CTTGTAGGAAGTAGGCGTTTGAATGAGATCATAATTTGAGAGCCACAGACAGAAAAATAA	natural antisense
1005	ASHGA5P038986	0.0109368	0.0312565	2.68568	ENST00000485218	RUVBL1-AS1	GENCODE	588	chr3	+	127794652	127797899	GAAAAAATAGGAGGAAAATTAAAATAATCCCACCTTCCTACCTATCCAGAACCATCTCCC	intronic antisense
1006	ASHGA5P056194	0.00241205	0.00923148	2.68168	TCONS_00000918	XLOC_000160	LincRNAs identified by Cabili et al	340	chr1	+	41898930	41930507	AACAGGCCAGGTTTCCCTAGGATCACCAGCTGTCATGGACTGATTTGTGTCTCTCCAAAT	intergenic
1007	ASHGA5P023476	0.0187261	0.0483196	2.67981	ENST00000581690	RP11-805F19.1	GENCODE	525	chr18	-	15159722	15164466	GAAAGAGTATCTGCCATTGAAGATTGGATATCTTGTTGTGATAAAGGCATGACATTATAC	intergenic
1008	ASHGA5P016619	0.0020224	0.00802848	2.67895	ENST00000432265	AC002451.3	GENCODE	771	chr7	+	95225993	95243031	GCAGAAACAGGCACTCCTTGATGAAATAAGTAAGAAAGCTTGTCAAGAGCCATCACTCTT	bidirectional
1009	ASHGA5P046266	0.00170658	0.0070168	2.67822	uc004elm.1	AK026512	UCSC_knowngene	994	chrX	-	103172239	103174131	GGTCATTTCTGTCTCTTATATTCCTAGGTTTCCCTTTATAAGGATTAGTCAGATCAACAT	natural antisense
1010	ASHGA5P044062	0.00841176	0.0253795	2.67814	ENST00000567210	AF067845.1	GENCODE	1192	chr8	-	1316807	1317999	TAGCATACCACATGCTTTATGCCAAAAATAAAAAATTGATATACGGCACCAGACGCACAA	intergenic
1011	ASHGA5P014142	9.93392e-05	0.000718919	2.67709	ENST00000400178	LINC00478	GENCODE	700	chr21	+	17443433	17979450	TCATCAGAGAGCATTTTACTACTGAGCTGCAAAGATGACAAGAGCACCTCAAAGGCAGCA	intergenic
1012	ASHGA5P023244	0.00219783	0.00858138	2.676	NR_028503	MIR22HG	RefSeq	1852	chr17	-	1614797	1619566	ACAACCCAAGGAAGCTGTGTCTGTTCGATTTGGTGGGAGGAGATGTGCAGGGAGCTGTAT	bidirectional
1013	ASHGA5P050650	0.0223522	0.0555168	2.67518	ENST00000440031	AC079776.2	pseudogene	223	chr2	-	130681130	130683361	CAGAGCACAGCATGTGACAGACACATGGCTATGCAATGCCATCTAGATGTCATAGAGGAG
1014	ASHGA5P022431	0.049383	0.104733	2.67459	ENST00000556583	RP11-770J1.3	GENCODE	234	chr11	-	118390330	118401809	AGGCGGAGTCGAAAAGACCCCGGCCATGGATGGGAGACCTAGGACAAAGATGGAAAAGAG	natural antisense
1015	ASHGA5P031947	3.15669e-05	0.000287368	2.67333	ENST00000568107	MIR4720	GENCODE	7616	chr16	+	81416873	81424489	GACCAGTAGACCTAACTGTGCTTTCTTAACTTGGATGTTACATGAAACTTAAAAACAAAC	intergenic
1016	ASHGA5P019794	0.00430533	0.0146981	2.67246	ENST00000503314	CTC-338M12.1	GENCODE	456	chr5	-	180632360	180633120	GGCAGATGAGTAAAGAGTAAAGAAGCCGGAGGACAGTCGCAGAAAAGGTAATGGAATGGA	intergenic
1017	ASHGA5P036443	0.000570612	0.00291329	2.67243	ENST00000450996	AC010136.2	GENCODE	568	chr2	+	218843429	218857338	CCGATGACAGGAGAAGCTGCAGACTGCAAGAGGGCGAGACACAGAAAGAAAGTTTTAGCC	natural antisense
1018	ASHGA5P054759	0.0016375	0.00678267	2.66978	ENST00000542172	RP11-504G3.1	GENCODE	331	chr11	+	18624533	18625440	CCAGCTGTACAGTTCCTGTTGTTGGTTTCACATAAAGTAATTGCACATTATTTTGTCATA	intergenic
1019	ASHGA5P028069	1.70098e-07	5.57e-06	2.66937	TCONS_00010037	XLOC_004467	LincRNAs identified by Cabili et al	3347	chr5	+	89705932	89712311	CGCCACAAATACAGTTAGGCAGCTTAGCCTTAGAAACACAAATTTTAAAAGTGAAGTAAA	intergenic
1020	ASHGA5P027488	0.00218848	0.00855286	2.66858	ENST00000547432	RP11-511B23.2	GENCODE	721	chr12	-	93573433	93609450	GCACAAGGTATATCTGCAGAAGTAACCATGGATTTAAAAGTAGCTACAGCATCAATTTAA	intergenic
1021	ASHGA5P057452	2.16531e-08	1.163e-06	2.66762	TCONS_00017499	XLOC_008151	LincRNAs identified by Cabili et al	282	chrX	-	46183608	46185222	CCAAAAGCAAATGATCCAATGGCCCCATCTAGACTGGAGACACCAACTCATGACTCAGCT	intergenic
1022	ASHGA5P055215	0.000556644	0.0028581	2.66689	ENST00000529392	RP11-677M14.7	GENCODE	2792	chr11	+	124670805	124676641	GTGACCTCTGGTAATGAATTAGTGTATTAGTCACTCCTGAAACGTTCCTTAAAGTGCTGG	bidirectional
1023	ASHGA5P035104	0.0107067	0.0308071	2.6625	ENST00000441238	TGFA-IT1	GENCODE	436	chr2	-	70694516	70695627	AGTTATGCAAACTACAGCAGACCCTTCCTGTCTCAATTCAGCATCCAGCGTCTACTGTTA	intron sense-overlapping
1024	ASHGA5P019295	2.28808e-05	0.000224764	2.66131	ENST00000477247	FAM86DP	pseudogene	986	chr3	-	75472111	75484261	CCTTCCCCTGAGCTTAGAAGCAAAGTTAAGAGACTCATCAGATTCTGAGCTGCTGCGGGA
1025	ASHGA5P026069	0.00106953	0.00480775	2.66115	ENST00000526377	RP11-713P17.4	GENCODE	1130	chr11	-	133905726	133907002	GTATGTACAGGCCTAAAAACAGAATACACATCCTACATGACATGTACACATGTGCACACA	intergenic
1026	ASHGA5P040132	1.2669e-09	1.54e-07	2.65692	uc009whu.1	DQ592442	UCSC_knowngene	2772	chr1	+	142853227	142855999	CACCGCATTACTGAAGCTATACTAACAACAGTCACTTTTAGTGGGTACTTCATGCATCAG	intergenic
1027	ASHGA5P049045	0.000991526	0.00452942	2.6562	NR_040252	ANKS3	RefSeq	2667	chr16	-	4746510	4784378	TAACGCACGTTCTGTGTTCTCTTGAAGCAAGGTGCAGAGCTAGAAATGAAAGACATCCAG	exon sense-overlapping
1028	ASHGA5P016790	0.000589362	0.00298937	2.65466	uc010zan.1	AK054990	UCSC_knowngene	2070	chr2	+	131451086	131462317	AAGACGGACACCGACCTAAGTCAATGTTAGTCTACCACTGTACGTCTGGTAACCTCAATC	intergenic
1029	ASHGA5P040151	0.0102359	0.0297498	2.65466	ENST00000505000	RP11-673E1.1	GENCODE	796	chr4	+	144898384	144903069	TTGTGGGATAAGGTAGGTGGGAGAATGGAAGAGTAGCAGACCCATTAGAATACAAAACAT	intergenic
1030	ASHGA5P042910	0.0386902	0.086211	2.65351	ENST00000434321	AC005019.3	GENCODE	359	chr7	-	13893979	13898650	CCCTTCACCCCTTTTCTTGTTAACATTGCAGTCAAACATTGATTATCATGCACTTTAATA	intergenic
1031	ASHGA5P046043	0.00404174	0.0140552	2.6533	ENST00000423793	RP11-432J22.2	GENCODE	311	chr9	+	138799657	138805359	AGATTGTCTATTTTTTCTTGAGTCAGCCGTCTGAAAAGAACACGAGGTGGACAGGGCAGA	bidirectional
1032	ASHGA5P015500	0.0287271	0.0680839	2.65314	ENST00000420823	AC090044.1	GENCODE	3948	chr3	+	577913	887698	GACTCTTTATGCATAGGAGCTTTAATATATAGTTGACACTTGAACAACATGGATCTGAAC	intergenic
1033	ASHGA5P055352	0.000193967	0.00122256	2.65137	ENST00000505338	AC121336.2	GENCODE	436	chr12	-	40223926	40229562	CATTTTTCAGTTACTGTAATGAATGTATGTTGGATCCAGACTGCGGTTTCTGCTACAAGA	exon sense-overlapping
1034	ASHGA5P057458	0.000495734	0.00259584	2.65108	TCONS_00017639	XLOC_008298	LincRNAs identified by Cabili et al	293	chrY	+	21440565	21442464	AAACAGAGCTTACATCCAAGGATACATACGTCTGAAACCTACAGGCCCATGTACTCCGAT	intergenic
1035	ASHGA5P016175	8.31857e-05	0.000625225	2.65094	ENST00000427598	RP11-445H22.4	GENCODE	862	chr20	-	43323532	43367537	TAAAGGAAATCTCTCCAACCAGGAACAAACACCTGCCTTGCAATATTAGGTGTCTGCCTC	intronic antisense
1036	ASHGA5P058476	0.000518379	0.00269438	2.64956	uc003zhh.1	FLJ35024	UCSC_knowngene	3167	chr9	-	2422701	2621413	CTTTTTGGCCCTAGGTAGGAAAGAGACAAATGGAAGCAAAATAGCAAAATGGTGAAGAGG	bidirectional
1037	ASHGA5P028469	0.0415562	0.09106	2.64711	TCONS_00011099	XLOC_005102	LincRNAs identified by Cabili et al	835	chr5	-	178121720	178134039	AACTACCATAAACATCCAGAAAATGGAGCAGGAAAACACAGCCCAGGGATCAGAAAAGCC	intergenic
1038	ASHGA5P023150	0.000369502	0.00204112	2.64641	ENST00000571302	RP11-462G12.2	GENCODE	774	chr16	-	3981217	3996306	TAAAAATTAAGGGAGAAACAGGAAAACTTTGAAGAATCTTCCAGATTTGCCTAACGCAGA	intergenic
1039	ASHGA5P017375	0.00187206	0.00755744	2.64143	ENST00000440802	AC097532.2	GENCODE	322	chr2	-	133043367	133051950	GTACACTTGGATATTTACTCACCTTTTTCTCATTCACTATGTCTGCCGTGGTCTCGATGA	intergenic
1040	ASHGA5P027069	2.96e-11	1.3e-08	2.64016	TCONS_00011631	XLOC_005119	LincRNAs identified by Cabili et al	739	chr6	+	230931	237179	TTTGCCCAAATATTAATAAACGCAAATGCACACCCCTGTTGTCCCTGTTGGACATGCTGG	intergenic
1041	ASHGA5P049703	6.0323e-06	7.9793e-05	2.63978	ENST00000580655	C17orf69	GENCODE	1942	chr17	+	43717727	43719669	TTTGTTCTAGTGCATGGCATGGGAAGCCCTCTCTAGGAGGATGCTGTGGCCACACAAGTG	intron sense-overlapping
1042	ASHGA5P052472	1.01493e-06	2.1119e-05	2.63768	ENST00000524034	CTB-12O2.1	GENCODE	399	chr5	+	151338458	151650006	CCACTGGTCTTAAAGACAGACCTGCAGATTCCTGAGCTAAATAAAAGTTTATTGTTGAAA	intergenic
1043	ASHGA5P022301	0.00503181	0.0167357	2.63747	ENST00000554105	RP11-266O8.1	GENCODE	676	chr15	+	93856330	94073643	CTCGTTTGAGGAACATCTGTCCAGTCCCTGGGATGGTGAGGCTATAACCACAAAGGAATA	intergenic
1044	ASHGA5P032934	1.76729e-07	5.748e-06	2.63679	ENST00000433419	CCDC144C	pseudogene	5227	chr17	+	20224629	20306870	CCTACCAAGAATCCAAGAAAGACACATTTTGTTTGTGTGAACACTTACTGAAACTTAAGA
1045	ASHGA5P044359	0.00445322	0.0151331	2.63418	TCONS_00002272	XLOC_000647	LincRNAs identified by Cabili et al	1073	chr1	+	247496211	247556671	ACTGTTCACCTTTTGAGGCACAAAACGGGCTGTTTATGCTGCTGCTGCATTTAGCTCAAA	intergenic
1046	ASHGA5P021592	0.0051785	0.0170935	2.63409	ENST00000535921	RP11-64B16.4	GENCODE	541	chr12	-	119619852	119621064	GTAATCTCAGCTCCCAATGACCCCATTTTACAGACGTGGAAATTGAGACTGCATGACTCA	intronic antisense
1047	ASHGA5P048778	0.00914795	0.0272142	2.63402	NR_045566	BBS4	RefSeq	2828	chr15	+	72978519	73030817	GGGCGACACGGTCCCCTTTTTACTGTCCCGGGAACTGGTCGCCTGGGGCAAGTCTGGATA	exon sense-overlapping
1048	ASHGA5P053330	0.000391039	0.00213312	2.63339	NR_073058	C7orf55	RefSeq	1083	chr7	+	139025195	139031065	AGTTTCGAGGGTAAAGCCTTTGGCGCGGTGATGTGGACTTTTGTTCTCTAACTACAACTC	exon sense-overlapping
1049	ASHGA5P043753	3.52748e-06	5.3708e-05	2.63179	uc003ufr.3	BC090058	UCSC_knowngene	1983	chr7	+	76178657	76182447	CTTTCTTATGTGACTCTAAAGGTCAAACCATACCACCTGAATATTTTTATCCTCTCTGAA	intron sense-overlapping
1050	ASHGA5P037514	5.34639e-08	2.312e-06	2.63082	ENST00000400362	BX322557.10	GENCODE	1460	chr21	+	46707976	46711653	TAACTTCTTACACTCCCATGAGTCCTCCTGGACAGGTGCTGTGACCTCGTGCAGCCTTGG	bidirectional
1051	ASHGA5P043907	0.00288757	0.0107348	2.63069	ENST00000470348	RP11-775D22.2	GENCODE	392	chr7	+	129781577	129782455	AAGAGACTGCAGCGAGGCGTGGAATTGGGAAGCTCTTCTGGTTTTATTAAAAACTCGTTC	intergenic
1052	ASHGA5P034997	0.00202216	0.00802848	2.63067	ENST00000457457	AC016735.1	GENCODE	237	chr2	-	43228494	43233200	TGGCCTGGAACCTAAGACTTGTCCAAAGATGTCACAGAGAGTAAAATGAGAAAAATCCAG	intergenic
1053	ASHGA5P027704	0.000875472	0.00409372	2.63017	ENST00000542980	RP11-76C10.5	GENCODE	1277	chr12	-	131474682	131478521	CATCAAATAGCCTTACCTTGGTGAGATTCAAGGCTGTCTGCTCCGAGAGGGACTTACTGG	natural antisense
1054	ASHGA5P058274	0.00210865	0.00829838	2.62911	TCONS_00029073	XLOC_013995	LincRNAs identified by Cabili et al	4150	chr21	-	10196441	10200844	ATGGTAGGGAGGAATTAGGTGTGTTCTTTGTTAAGCAGGTAGTCTTATTTGTGGGATAGT	intergenic
1055	ASHGA5P022429	0.000726004	0.00354935	2.62789	ENST00000556519	RP11-266O8.1	GENCODE	515	chr15	+	93856414	94041876	CCACAAAGGAATAAGAGAAGACGACTAGTTTTGTAATGGGCACAGTGGATTGAAGAGGGG	intergenic
1056	ASHGA5P043980	1.1093e-05	0.000127329	2.62613	uc003wde.3	DQ786304	UCSC_knowngene	1485	chr7	+	143306174	143307659	GAAGAGGCTTCATAGGTACATTTCCTTTTCTATGGCACAGGCATGATGATATTGGGTGTG	intergenic
1057	ASHGA5P048814	0.000670165	0.00333163	2.62263	ENST00000568307	RP11-114H24.2	GENCODE	903	chr15	-	78207066	78208143	TCCTCTTGCAGGAGAGTCCTTCACCGTATATGAAAGCCAGGGGGCAGTGCCAAACACGTG	intergenic
1058	ASHGA5P041845	0.000962542	0.00442413	2.62133	uc003owm.1	AK024736	UCSC_knowngene	1515	chr6	-	43964176	44042389	CCTGCTTTGAGGACAGCTGAAGTCTTGCCACTTCTTCTGGATGCTCTGACCATCAGTAAG	natural antisense
1059	ASHGA5P053143	9.85116e-05	0.000715163	2.62108	NR_029411	LOC100133091	RefSeq	2712	chr7	+	76178657	76257299	TTTTAGACGGTTAAAAACCCACCAGTTAAGACATTTTCCAAAGAACTTAAGTCTCTTTCT	natural antisense
1060	ASHGA5P046339	4.5595e-06	6.4919e-05	2.61991	NR_024607	MGC16121	RefSeq	786	chrX	-	133677406	133680660	TTCTTGAAGGCATCCAGCATCTCCAGTTAGCAGTACTGATTTTTTTTCCCCCCAACAAAG	intergenic
1061	ASHGA5P041290	0.0105832	0.0305352	2.61884	TCONS_00020641	XLOC_009943	LincRNAs identified by Cabili et al	456	chr12	+	127615943	127630565	TAAAATAATAAAATTATCAACTGCAACACCTCAGGGACGGCCCAGATGCTCCTATGGCCA	intergenic
1062	ASHGA5P031558	0.000973009	0.00446091	2.61811	TCONS_00007264	XLOC_003249	LincRNAs identified by Cabili et al	1324	chr3	-	129832345	129839595	AAATGTTTTCCTTCAATGACAGTAATGCTGCCAGAACCCATCAAGACACCCAGGAACTGA	intergenic
1063	ASHGA5P025688	0.0200688	0.0510052	2.61806	NR_026956	LOC284440	RefSeq	2385	chr19	-	19867180	19887222	TACAGCTAGGGACGTGAAAGAACGGGGAAGATAACCGAAGGGTGGTTTGAGAAACCCACC	intergenic
1064	ASHGA5P036091	0.00709089	0.022203	2.61554	ENST00000553869	AC016683.6	GENCODE	529	chr2	+	113992117	114020939	TCAAGTTCTTCCCGCAGACACCTGGCTCCTTGAGGGGAGGTGCAGCTTTCATCTGACCAT	intronic antisense
1065	ASHGA5P054247	0.00596401	0.0192452	2.61303	NR_026761	LINC00467	RefSeq	797	chr1	+	211556096	211605877	TGCGCGCGCTGTGACGTTCCCTACGCGGTCGGGCGTTGGGTTTCGCGGCGCTCGCCGCAC	intergenic
1066	ASHGA5P020872	0.000240072	0.00145281	2.61283	ENST00000521213	FAM90A11P	GENCODE	485	chr8	-	7872832	7874534	TCCAATTAAAAGGTTAGGGTACGTTCCATGTCAGGTGACCAGAGGCAGTATAAAAGGCAG	intergenic
1067	ASHGA5P014688	1.18012e-05	0.000133641	2.61097	NR_033263	C20orf166-AS1	RefSeq	3610	chr20	-	61141437	61148768	CCACTTTACGGAGAAGGAACGTGGGCTCAGGGTGGTTTAAGGCGTGAATGAATGAAGGAG	intronic antisense
1068	ASHGA5P051229	0.000933116	0.00431864	2.60827	uc021wmh.1	AK308704	UCSC_knowngene	1114	chr22	+	21823878	21824992	CGCCCCGCAGGCGGTGCGTGCTGGGCGCGCTGCAGGTGCTGCTGACGCTGCCGCTCCTCT	exon sense-overlapping
1069	ASHGA5P053156	2.765e-10	6.4e-08	2.60506	ENST00000435749	MAGI2-AS3	GENCODE	269	chr7	+	79084148	79088256	TGACCCCAAGCAGTGTTCCCTTCTTTTCGCCAGGTTTGCATCCAAGAGAGGGGAGGACAG	intergenic
1070	ASHGA5P036705	0.0427552	0.0931077	2.60438	ENST00000564051	RP3-333B15.4	GENCODE	1186	chr20	-	23497520	23498706	TTGCTCATGACTCAAGATAATCAGGATTTTAGGAAAGACCCAGCTAGGAAGGTCCCAGGA	intergenic
1071	ASHGA5P052786	0.00185485	0.00750709	2.60429	ENST00000435858	RP1-300G12.2	GENCODE	784	chr6	-	82236818	82244630	AAATTTGTCATTAAATGTCTTCATCATTTAGCCTGTTTAATTGTGCTAAGATCTTTTAAG	intron sense-overlapping
1072	ASHGA5P018863	0.00187195	0.00755744	2.60367	ENST00000458468	LINC00478	GENCODE	3475	chr21	+	17442841	17982094	CTATCCAAATGGACATCCATAAAAATTCATCAGAGAGCATTTTACTACTGAGCTGCAAAG	intergenic
1073	ASHGA5P015219	0.00089145	0.00416229	2.60276	ENST00000418062	AC010680.1	GENCODE	544	chr2	+	179501286	179510650	CCTTTAGCTGTTTAGGAAAATGCAAGAAGACATATGTAGATGAGACAAAGATAGACCATG	natural antisense
1074	ASHGA5P034819	1.96161e-07	6.183e-06	2.59765	NR_027334	LOC100131691	RefSeq	2620	chr19	+	59070552	59086164	CTGTCCAGTTATATGCTACCCTGTACAGGTTGATAGGTTGCAAATGCTTTCTGTCCAGTG	natural antisense
1075	ASHGA5P037832	0.00102338	0.00464979	2.5931	uc002zwm.3	BCR	UCSC_knowngene	1500	chr22	+	22979652	22981152	TGTGTGCTGTCTAATGATGGGATGACCACACTTTTCCATGTTCTAAAAGTGCTCCTCTCC	intergenic
[truncated: 698 more rows]
