# Supplementary material for: LncRNA and mRNA expression profiles reveal the potential roles of lncRNA contributing to regulating dural penetration in clival chordoma
Source: Aging (Albany NY). 2020 Jun 13;12(11):10809–26. doi: 10.18632/aging.103294 (PMC7346080; doi:10.18632/aging.103294)
Supplement: Supplementary Table 3 [file aging-12-103294-s004..xlsx]

## Sheet: lncRNA-mRNA coexpression networ
Table S3 Properties of lncRNAs and mRNAs in lncRNA-mRNA co-expression network
Gene1	Gene1_Type	Gene2	Gene2_Type	Relation	P-Value	Regulation
RP11-254K3.1	noncoding	STEAP1	protein_coding	-0.999805	0	Negative
FLT1	protein_coding	BC028842	noncoding	-0.999635	1.9984e-15	Negative
RP13-726E6.2	noncoding	WDR66	protein_coding	-0.999623	2.22045e-15	Negative
LINC00607	noncoding	ADH1C	protein_coding	-0.99957	3.9968e-15	Negative
SSX2IP	protein_coding	RP11-841O20.2	noncoding	-0.999482	9.76996e-15	Negative
RP11-254K3.1	noncoding	CST1	protein_coding	-0.999461	1.15463e-14	Negative
RP11-254K3.1	noncoding	POSTN	protein_coding	-0.999442	1.33227e-14	Negative
AC007682.1	noncoding	POSTN	protein_coding	-0.999442	1.33227e-14	Negative
U73167.7	noncoding	CSRP2	protein_coding	-0.999425	1.53211e-14	Negative
RP11-38H17.1	noncoding	STEAP1	protein_coding	-0.999362	2.44249e-14	Negative
RP11-90D4.2	noncoding	WDR66	protein_coding	-0.999331	3.01981e-14	Negative
AC007682.1	noncoding	CST4	protein_coding	-0.99931	3.4861e-14	Negative
NR1D1	protein_coding	XLOC_008992	noncoding	-0.9993	3.70814e-14	Negative
RP11-1336O20.2	noncoding	FANK1	protein_coding	-0.999298	3.77476e-14	Negative
CTD-2015H6.3	noncoding	MAML3	protein_coding	-0.999287	4.01901e-14	Negative
LINC00607	noncoding	CASP10	protein_coding	-0.999266	4.61853e-14	Negative
POFUT2	protein_coding	RP11-872J21.3	noncoding	-0.99926	4.75175e-14	Negative
RP11-1336O20.2	noncoding	RIBC2	protein_coding	-0.999249	5.10703e-14	Negative
RP13-726E6.2	noncoding	FANK1	protein_coding	-0.999219	6.08402e-14	Negative
BC033241	noncoding	MPZL2	protein_coding	-0.999213	6.28386e-14	Negative
RP13-726E6.2	noncoding	LRRIQ1	protein_coding	-0.999208	6.4615e-14	Negative
XLOC_005119	noncoding	IQCD	protein_coding	-0.999208	6.4615e-14	Negative
GS1-526D21.5	noncoding	CATSPERD	protein_coding	-0.999197	6.90559e-14	Negative
RP11-438D8.2	noncoding	DMBT1	protein_coding	-0.999188	7.23865e-14	Negative
RP11-1336O20.2	noncoding	AMY1B	protein_coding	-0.999188	7.26086e-14	Negative
RP11-254K3.1	noncoding	FDCSP	protein_coding	-0.999187	7.28306e-14	Negative
RP11-426L16.8	noncoding	TFF3	protein_coding	-0.999183	7.4607e-14	Negative
NEK7	protein_coding	XLOC_010305	noncoding	-0.999179	7.59393e-14	Negative
RP11-778H2.1	noncoding	DHRS9	protein_coding	-0.999166	8.17124e-14	Negative
XLOC_005119	noncoding	KRT23	protein_coding	-0.999146	9.08162e-14	Negative
ADCY8	protein_coding	FW340055	noncoding	-0.999137	9.50351e-14	Negative
RP11-778H2.1	noncoding	C9orf24	protein_coding	-0.999136	9.59233e-14	Negative
PDK4	protein_coding	XLOC_007896	noncoding	-0.999134	9.68114e-14	Negative
RP11-155G14.5	noncoding	RIBC2	protein_coding	-0.999129	9.9476e-14	Negative
CYBRD1	protein_coding	XLOC_010305	noncoding	-0.999128	9.99201e-14	Negative
TPTEP1	noncoding	CCL14	protein_coding	-0.999126	1.00808e-13	Negative
XLOC_006928	noncoding	POSTN	protein_coding	-0.99912	1.03917e-13	Negative
AC002454.1	noncoding	CLDN7	protein_coding	-0.999117	1.05693e-13	Negative
chr7:19668825-19689525	noncoding	KRT23	protein_coding	-0.999104	1.12577e-13	Negative
SEC31A	protein_coding	AL833346	noncoding	-0.999101	1.14575e-13	Negative
RP13-726E6.2	noncoding	C9orf116	protein_coding	-0.999078	1.28342e-13	Negative
FAM86DP	noncoding	UGT1A3	protein_coding	-0.999064	1.37224e-13	Negative
RP11-90D4.2	noncoding	RIBC2	protein_coding	-0.999057	1.42109e-13	Negative
GPM6B	protein_coding	XLOC_007896	noncoding	-0.999056	1.42331e-13	Negative
APP	protein_coding	BC028842	noncoding	-0.999054	1.44329e-13	Negative
RP11-1060J15.4	noncoding	XCL1	protein_coding	-0.999051	1.45661e-13	Negative
RP11-736K20.5	noncoding	BID	protein_coding	-0.99905	1.46994e-13	Negative
KCNIP4	protein_coding	U47924.27	noncoding	-0.999038	1.54987e-13	Negative
AK021933	noncoding	CEACAM3	protein_coding	-0.999038	1.55431e-13	Negative
RP11-90D4.2	noncoding	AMY1B	protein_coding	-0.999024	1.65645e-13	Negative
AC084117.3	noncoding	AMY1B	protein_coding	-0.999022	1.66978e-13	Negative
CLTB	protein_coding	ABCC6P1	noncoding	-0.999015	1.72307e-13	Negative
RP13-317D12.3	noncoding	PRB2	protein_coding	-0.999009	1.77414e-13	Negative
NT5DC3	protein_coding	Z83851.1	noncoding	-0.998998	1.86517e-13	Negative
RP11-90D4.2	noncoding	LRRIQ1	protein_coding	-0.998997	1.87406e-13	Negative
POFUT2	protein_coding	RP11-247L20.4	noncoding	-0.998989	1.94067e-13	Negative
RP11-778H2.1	noncoding	P2RY14	protein_coding	-0.998989	1.94511e-13	Negative
RP11-90D4.2	noncoding	CH25H	protein_coding	-0.998979	2.02949e-13	Negative
RP11-308B16.2	noncoding	GSTA1	protein_coding	-0.998975	2.06501e-13	Negative
RP13-726E6.2	noncoding	RIBC2	protein_coding	-0.998975	2.06724e-13	Negative
RP11-1336O20.2	noncoding	LRRIQ1	protein_coding	-0.998964	2.1716e-13	Negative
RP11-400N13.1	noncoding	DHRS9	protein_coding	-0.998956	2.24265e-13	Negative
LYAR	protein_coding	XLOC_010305	noncoding	-0.998953	2.27374e-13	Negative
ITGB8	protein_coding	ANKRD30BP2	noncoding	-0.998949	2.3137e-13	Negative
AC002456.2	noncoding	MPPED2	protein_coding	-0.998946	2.34479e-13	Negative
RP13-726E6.2	noncoding	TSPAN1	protein_coding	-0.998942	2.38032e-13	Negative
LINC00607	noncoding	CCDC65	protein_coding	-0.998935	2.45803e-13	Negative
LINC00607	noncoding	S100P	protein_coding	-0.998933	2.47802e-13	Negative
AC015987.1	noncoding	FAM154B	protein_coding	-0.99893	2.50466e-13	Negative
ZNF385B	protein_coding	AC116614.1	noncoding	-0.99893	2.50466e-13	Negative
CERS6	protein_coding	RP11-473M20.11	noncoding	-0.998928	2.52687e-13	Negative
RP11-2E11.5	noncoding	MOCOS	protein_coding	-0.998927	2.53575e-13	Negative
SMOC1	protein_coding	BC044655	noncoding	-0.998926	2.54907e-13	Negative
XLOC_000595	noncoding	DENND2D	protein_coding	-0.998925	2.56239e-13	Negative
SLC8A3	protein_coding	RP1-8B1.4	noncoding	-0.99892	2.61569e-13	Negative
FAM115C	protein_coding	ALMS1P	noncoding	-0.998911	2.71339e-13	Negative
ELAVL2	protein_coding	XLOC_007896	noncoding	-0.998909	2.74003e-13	Negative
XLOC_002733	noncoding	CUTC	protein_coding	-0.998907	2.75557e-13	Negative
RP11-90D4.2	noncoding	CFP	protein_coding	-0.998906	2.76668e-13	Negative
RP13-726E6.2	noncoding	SNCA	protein_coding	-0.998902	2.81775e-13	Negative
RP11-155G14.5	noncoding	NTS	protein_coding	-0.998884	3.03313e-13	Negative
RP11-308B16.2	noncoding	POSTN	protein_coding	-0.998883	3.04645e-13	Negative
chr7:19668825-19689525	noncoding	CST4	protein_coding	-0.998881	3.06866e-13	Negative
LOC285768	noncoding	ODF2L	protein_coding	-0.998876	3.12861e-13	Negative
QKI	protein_coding	BC028842	noncoding	-0.998876	3.12861e-13	Negative
XLOC_004244	noncoding	STEAP1	protein_coding	-0.99887	3.2041e-13	Negative
RP11-736K20.5	noncoding	TCTEX1D2	protein_coding	-0.998865	3.26406e-13	Negative
LOC389831	protein_coding	XLOC_007896	noncoding	-0.998851	3.44835e-13	Negative
RP11-90D4.2	noncoding	LRRC46	protein_coding	-0.998847	3.50386e-13	Negative
U73167.7	noncoding	MDH1B	protein_coding	-0.998834	3.68816e-13	Negative
RP11-155G14.5	noncoding	WDR66	protein_coding	-0.998833	3.69704e-13	Negative
RP11-400N13.1	noncoding	DMBT1	protein_coding	-0.998833	3.7037e-13	Negative
RP11-90D4.2	noncoding	CATSPERD	protein_coding	-0.998831	3.73479e-13	Negative
RP11-618G20.2	noncoding	PLA2G10	protein_coding	-0.998824	3.83027e-13	Negative
XLOC_006928	noncoding	CST1	protein_coding	-0.998824	3.83249e-13	Negative
U73167.7	noncoding	AMY1C	protein_coding	-0.998823	3.84137e-13	Negative
RAB38	protein_coding	RP11-429G19.2	noncoding	-0.998823	3.85025e-13	Negative
RP11-90D4.2	noncoding	SNCA	protein_coding	-0.998816	3.95683e-13	Negative
RP11-254K3.1	noncoding	GSTA1	protein_coding	-0.998814	3.9857e-13	Negative
RP11-400N13.1	noncoding	POSTN	protein_coding	-0.998807	4.0945e-13	Negative
chr7:19668825-19689525	noncoding	RSPH4A	protein_coding	-0.998806	4.10783e-13	Negative
RP11-1336O20.2	noncoding	WDR66	protein_coding	-0.998802	4.16112e-13	Negative
AK023304	noncoding	RPS6KA5	protein_coding	-0.998801	4.17666e-13	Negative
PRL	protein_coding	U47924.27	noncoding	-0.998791	4.33653e-13	Negative
RP11-849N15.2	noncoding	CEACAM3	protein_coding	-0.998789	4.37872e-13	Negative
LINC00607	noncoding	CST2	protein_coding	-0.998789	4.37872e-13	Negative
EGF	protein_coding	ABCC6P1	noncoding	-0.998769	4.70068e-13	Negative
RP11-90D4.2	noncoding	FANK1	protein_coding	-0.998766	4.7562e-13	Negative
AC007682.1	noncoding	AHR	protein_coding	-0.998765	4.76952e-13	Negative
chr7:19668825-19689525	noncoding	DMBT1	protein_coding	-0.998764	4.7895e-13	Negative
RP11-90D4.2	noncoding	FXYD3	protein_coding	-0.998764	4.79616e-13	Negative
RP11-155G14.5	noncoding	TSPAN1	protein_coding	-0.99876	4.85834e-13	Negative
U73167.7	noncoding	MPZL2	protein_coding	-0.998757	4.91163e-13	Negative
XLOC_000595	noncoding	LRRC10B	protein_coding	-0.998757	4.91607e-13	Negative
BC033241	noncoding	MDH1B	protein_coding	-0.998751	5.03375e-13	Negative
XLOC_004128	noncoding	CATSPERD	protein_coding	-0.998749	5.05374e-13	Negative
XLOC_013275	noncoding	PPIL6	protein_coding	-0.998747	5.10259e-13	Negative
RP11-254K3.1	noncoding	GUCY1A3	protein_coding	-0.998745	5.13811e-13	Negative
AK000840	noncoding	P2RY14	protein_coding	-0.998743	5.17586e-13	Negative
LL22NC03-86G7.1	noncoding	CES1	protein_coding	-0.998741	5.20917e-13	Negative
CTD-2501M5.1	noncoding	NRARP	protein_coding	-0.99873	5.40901e-13	Negative
RP11-778H2.1	noncoding	STEAP1	protein_coding	-0.998723	5.54445e-13	Negative
XLOC_004244	noncoding	GUCY1A3	protein_coding	-0.998718	5.64437e-13	Negative
AC002454.1	noncoding	MDH1B	protein_coding	-0.998718	5.6577e-13	Negative
SLC35E1	protein_coding	XLOC_011256	noncoding	-0.998718	5.6577e-13	Negative
CTD-2501M5.1	noncoding	CST2	protein_coding	-0.998717	5.66658e-13	Negative
RP11-400N13.1	noncoding	STEAP1	protein_coding	-0.998717	5.67546e-13	Negative
RP11-87H9.3	noncoding	GALNT4	protein_coding	-0.998711	5.78648e-13	Negative
XLOC_004186	noncoding	CMYA5	protein_coding	-0.998707	5.8642e-13	Negative
BC033241	noncoding	HCAR2	protein_coding	-0.998706	5.90195e-13	Negative
RP11-254K3.1	noncoding	DHRS9	protein_coding	-0.998698	6.05738e-13	Negative
LINC00607	noncoding	SNTN	protein_coding	-0.998697	6.07958e-13	Negative
PITPNM3	protein_coding	BC028842	noncoding	-0.998695	6.12399e-13	Negative
ENPP6	protein_coding	XLOC_007896	noncoding	-0.998681	6.42153e-13	Negative
SAMD5	protein_coding	RP11-263K19.4	noncoding	-0.998681	6.42153e-13	Negative
LINC00607	noncoding	GSTA1	protein_coding	-0.998678	6.48814e-13	Negative
PRSS44	noncoding	PPAP2B	protein_coding	-0.998676	6.52811e-13	Negative
AC007682.1	noncoding	CST1	protein_coding	-0.998672	6.62803e-13	Negative
EPS8	protein_coding	XLOC_007896	noncoding	-0.998671	6.63913e-13	Negative
AL035610.1	noncoding	SNCA	protein_coding	-0.998669	6.68798e-13	Negative
ERRFI1	protein_coding	RP11-298J20.3	noncoding	-0.998669	6.69242e-13	Negative
KCNIP4	protein_coding	FW340055	noncoding	-0.998667	6.72351e-13	Negative
YWHAH	protein_coding	SLC7A7	noncoding	-0.998662	6.84341e-13	Negative
KIAA1161	protein_coding	RP1-8B1.4	noncoding	-0.998661	6.87006e-13	Negative
ADAMTSL1	protein_coding	XLOC_012538	noncoding	-0.998657	6.96998e-13	Negative
RP11-254K3.1	noncoding	CST4	protein_coding	-0.998655	7.00329e-13	Negative
XLOC_005768	noncoding	TMEM91	protein_coding	-0.998655	7.00773e-13	Negative
XLOC_011178	noncoding	C4orf47	protein_coding	-0.998654	7.02549e-13	Negative
FZD9	protein_coding	XLOC_000090	noncoding	-0.998648	7.17648e-13	Negative
AC007682.1	noncoding	DMBT1	protein_coding	-0.998645	7.25198e-13	Negative
AC002456.2	noncoding	TEKT1	protein_coding	-0.99864	7.38076e-13	Negative
FAM86DP	noncoding	KRT23	protein_coding	-0.998637	7.43405e-13	Negative
XLOC_004128	noncoding	LRRC46	protein_coding	-0.998633	7.53619e-13	Negative
PRL	protein_coding	EFCAB1	noncoding	-0.998631	7.5806e-13	Negative
RP11-90D4.2	noncoding	PIH1D2	protein_coding	-0.998629	7.63833e-13	Negative
XLOC_004244	noncoding	XCL1	protein_coding	-0.998626	7.70717e-13	Negative
GADD45B	protein_coding	RP1-8B1.4	noncoding	-0.998626	7.70717e-13	Negative
LOC100506497	noncoding	SCPEP1	protein_coding	-0.998626	7.71383e-13	Negative
XLOC_012083	noncoding	MPZL2	protein_coding	-0.998625	7.73159e-13	Negative
XLOC_011178	noncoding	F3	protein_coding	-0.998617	7.9492e-13	Negative
RP11-849N15.2	noncoding	AKR1C4	protein_coding	-0.998616	7.97584e-13	Negative
LOC100506497	noncoding	TPSAB1	protein_coding	-0.998611	8.10019e-13	Negative
RP11-618G20.2	noncoding	CCL14	protein_coding	-0.998609	8.1446e-13	Negative
LINC00607	noncoding	LRRC10B	protein_coding	-0.998609	8.14682e-13	Negative
RP11-680C21.1	noncoding	FFAR2	protein_coding	-0.998606	8.23341e-13	Negative
KCNIP4	protein_coding	RP11-298J20.3	noncoding	-0.998606	8.23785e-13	Negative
TPTEP1	noncoding	F3	protein_coding	-0.998604	8.30225e-13	Negative
XLOC_005119	noncoding	S100P	protein_coding	-0.998603	8.32445e-13	Negative
PYGB	protein_coding	ABCC6P1	noncoding	-0.998602	8.34666e-13	Negative
XLOC_005119	noncoding	RSPH4A	protein_coding	-0.998599	8.41993e-13	Negative
RP11-90D4.2	noncoding	NQO1	protein_coding	-0.998599	8.42437e-13	Negative
RP11-90D4.2	noncoding	FAM154B	protein_coding	-0.998597	8.46878e-13	Negative
MTUS2	protein_coding	Z83851.1	noncoding	-0.998597	8.48654e-13	Negative
LINC00304	noncoding	CYB5A	protein_coding	-0.998596	8.49321e-13	Negative
BC033241	noncoding	TMC5	protein_coding	-0.998594	8.57092e-13	Negative
RP11-308B16.2	noncoding	FDCSP	protein_coding	-0.998592	8.60423e-13	Negative
CASD1	protein_coding	BC044655	noncoding	-0.998591	8.63754e-13	Negative
CHSY3	protein_coding	RP11-404P21.5	noncoding	-0.998587	8.753e-13	Negative
RP11-1223D19.1	noncoding	CYB5A	protein_coding	-0.998587	8.76188e-13	Negative
SLC8A3	protein_coding	RP11-263K19.4	noncoding	-0.998586	8.79297e-13	Negative
NSUN5P1	noncoding	CYB5A	protein_coding	-0.998585	8.81517e-13	Negative
RP11-155G14.5	noncoding	LRRIQ1	protein_coding	-0.99858	8.93952e-13	Negative
RP11-778H2.1	noncoding	EYA4	protein_coding	-0.99858	8.9595e-13	Negative
RP11-254K3.1	noncoding	ADRB1	protein_coding	-0.998578	9.01057e-13	Negative
LINC00607	noncoding	DEFA3	protein_coding	-0.998568	9.28146e-13	Negative
AC007682.1	noncoding	STEAP1	protein_coding	-0.998567	9.32587e-13	Negative
LINC00607	noncoding	SCIN	protein_coding	-0.998566	9.35474e-13	Negative
RP11-90D4.2	noncoding	C9orf116	protein_coding	-0.998562	9.46354e-13	Negative
RP11-90D4.2	noncoding	LRRC48	protein_coding	-0.998562	9.47908e-13	Negative
LINC00607	noncoding	DYX1C1	protein_coding	-0.998561	9.50795e-13	Negative
PCDHGB7	protein_coding	RP11-495P10.5	noncoding	-0.99856	9.54126e-13	Negative
GRB10	protein_coding	RP11-841O20.2	noncoding	-0.998556	9.63674e-13	Negative
FAM115C	protein_coding	RP4-555L14.5	noncoding	-0.998556	9.64118e-13	Negative
RP11-1336O20.2	noncoding	CFP	protein_coding	-0.998551	9.81215e-13	Negative
XLOC_013222	noncoding	LRRC23	protein_coding	-0.998548	9.90541e-13	Negative
CD164	protein_coding	LOC100133445	noncoding	-0.998546	9.94094e-13	Negative
SYNM	protein_coding	ABCC6P1	noncoding	-0.998539	1.01652e-12	Negative
LDHA	protein_coding	XLOC_011944	noncoding	-0.998532	1.04028e-12	Negative
XLOC_005119	noncoding	SNTN	protein_coding	-0.998531	1.04361e-12	Negative
RP11-254K3.1	noncoding	KRT23	protein_coding	-0.998528	1.05249e-12	Negative
TPM1	protein_coding	BC028842	noncoding	-0.998523	1.06715e-12	Negative
RP11-254K3.1	noncoding	CCL26	protein_coding	-0.998523	1.0687e-12	Negative
DGKG	protein_coding	ALMS1P	noncoding	-0.998522	1.07248e-12	Negative
RP11-849I19.1	noncoding	RIBC2	protein_coding	-0.998521	1.07425e-12	Negative
RP11-38H17.1	noncoding	CST1	protein_coding	-0.998514	1.09956e-12	Negative
PRSS44	noncoding	S100A9	protein_coding	-0.998507	1.12221e-12	Negative
XLOC_004244	noncoding	GSTA1	protein_coding	-0.998499	1.1473e-12	Negative
AC002456.2	noncoding	CCDC173	protein_coding	-0.998498	1.15308e-12	Negative
EGLN1	protein_coding	XLOC_008992	noncoding	-0.998497	1.15419e-12	Negative
RP11-90D4.2	noncoding	PTGER3	protein_coding	-0.998496	1.16085e-12	Negative
GADD45B	protein_coding	RP11-298J20.3	noncoding	-0.998489	1.18217e-12	Negative
RP11-155G14.5	noncoding	KCNJ15	protein_coding	-0.998488	1.18794e-12	Negative
chr7:19668825-19689525	noncoding	CCDC88C	protein_coding	-0.998484	1.19971e-12	Negative
DMP1	protein_coding	XLOC_007896	noncoding	-0.998484	1.20037e-12	Negative
LOC285768	noncoding	STEAP1	protein_coding	-0.998482	1.20703e-12	Negative
ADCY8	protein_coding	U47924.27	noncoding	-0.998482	1.20792e-12	Negative
RP11-1336O20.2	noncoding	TSPAN1	protein_coding	-0.998478	1.22236e-12	Negative
AC006445.8	noncoding	F3	protein_coding	-0.998476	1.22946e-12	Negative
XLOC_004244	noncoding	CYB5A	protein_coding	-0.998475	1.23324e-12	Negative
AKT3	protein_coding	XLOC_010305	noncoding	-0.998473	1.24079e-12	Negative
AK123617	noncoding	ARL4A	protein_coding	-0.99847	1.25322e-12	Negative
RP11-1336O20.2	noncoding	C14orf45	protein_coding	-0.998465	1.26876e-12	Negative
XLOC_004244	noncoding	FAM183A	protein_coding	-0.998465	1.26965e-12	Negative
AC099342.1	noncoding	DMBT1	protein_coding	-0.998464	1.27232e-12	Negative
NEDD9	protein_coding	FLJ26850	noncoding	-0.998463	1.27764e-12	Negative
RP11-155G14.5	noncoding	FANK1	protein_coding	-0.998459	1.29319e-12	Negative
RP13-726E6.2	noncoding	AMY1B	protein_coding	-0.998458	1.29718e-12	Negative
XLOC_009869	noncoding	TCTEX1D1	protein_coding	-0.998457	1.30029e-12	Negative
BC033241	noncoding	CEACAM3	protein_coding	-0.998457	1.30118e-12	Negative
RP11-155G14.5	noncoding	ARL3	protein_coding	-0.998456	1.30584e-12	Negative
AGRN	protein_coding	RP11-465B22.3	noncoding	-0.99845	1.32894e-12	Negative
XLOC_004128	noncoding	SNCA	protein_coding	-0.998448	1.33582e-12	Negative
HAS2-AS1	noncoding	GSTA1	protein_coding	-0.998446	1.3427e-12	Negative
RP11-400N13.1	noncoding	C9orf24	protein_coding	-0.998441	1.36047e-12	Negative
NOG	protein_coding	XLOC_012538	noncoding	-0.99844	1.36513e-12	Negative
ACAA1	protein_coding	RP11-275I14.4	noncoding	-0.998439	1.36957e-12	Negative
chr7:19668825-19689525	noncoding	NRARP	protein_coding	-0.998436	1.38201e-12	Negative
MT1JP	noncoding	CYB5A	protein_coding	-0.998434	1.39111e-12	Negative
RP11-143E21.7	noncoding	GK	protein_coding	-0.998433	1.39311e-12	Negative
TPTEP1	noncoding	MIPEP	protein_coding	-0.998433	1.39488e-12	Negative
XLOC_004244	noncoding	UGT1A3	protein_coding	-0.998432	1.39622e-12	Negative
RP11-308B16.2	noncoding	GUCY1A3	protein_coding	-0.998427	1.41887e-12	Negative
RP13-726E6.2	noncoding	C10orf107	protein_coding	-0.998424	1.42997e-12	Negative
RP11-1336O20.2	noncoding	LRRC48	protein_coding	-0.998423	1.43641e-12	Negative
RP13-726E6.2	noncoding	KCNJ15	protein_coding	-0.998422	1.44018e-12	Negative
XLOC_005119	noncoding	C9orf24	protein_coding	-0.99842	1.44684e-12	Negative
FAM86DP	noncoding	CCDC173	protein_coding	-0.998419	1.44951e-12	Negative
DISP1	protein_coding	BC028842	noncoding	-0.998413	1.4766e-12	Negative
T	protein_coding	GPX2	noncoding	-0.998407	1.50191e-12	Negative
GS1-526D21.5	noncoding	SNCA	protein_coding	-0.998404	1.51301e-12	Negative
RP11-308B16.2	noncoding	CST1	protein_coding	-0.998402	1.52278e-12	Negative
RP13-726E6.2	noncoding	LRRC48	protein_coding	-0.998402	1.52323e-12	Negative
KIAA1161	protein_coding	RNF157-AS1	noncoding	-0.998399	1.53477e-12	Negative
AC084117.3	noncoding	CFP	protein_coding	-0.998397	1.54499e-12	Negative
LL22NC03-86G7.1	noncoding	ADD3	protein_coding	-0.998395	1.55276e-12	Negative
RP11-254K3.1	noncoding	SOX2	protein_coding	-0.998394	1.55698e-12	Negative
RP11-849I19.1	noncoding	LRRIQ1	protein_coding	-0.998391	1.5703e-12	Negative
FAM86DP	noncoding	GUCY1A3	protein_coding	-0.998388	1.58185e-12	Negative
RP13-726E6.2	noncoding	FXYD3	protein_coding	-0.998388	1.58229e-12	Negative
CD164	protein_coding	FLJ26850	noncoding	-0.998381	1.61648e-12	Negative
SERPINE2	protein_coding	EFCAB1	noncoding	-0.99838	1.61737e-12	Negative
chr7:19668825-19689525	noncoding	TEKT3	protein_coding	-0.998379	1.62403e-12	Negative
TPTEP1	noncoding	SLC31A1	protein_coding	-0.998378	1.62625e-12	Negative
FAM86DP	noncoding	DYNLRB2	protein_coding	-0.998375	1.64002e-12	Negative
FAM86DP	noncoding	IQCG	protein_coding	-0.998374	1.64491e-12	Negative
XLOC_004244	noncoding	FDCSP	protein_coding	-0.998372	1.65512e-12	Negative
ERRFI1	protein_coding	PSORS1C3	noncoding	-0.998371	1.65756e-12	Negative
RP11-143E21.7	noncoding	PYHIN1	protein_coding	-0.998371	1.65823e-12	Negative
LRRFIP2	protein_coding	RP11-131N11.4	noncoding	-0.99837	1.66467e-12	Negative
BCRP2	noncoding	ADH1A	protein_coding	-0.998367	1.68043e-12	Negative
AC003986.7	noncoding	AHR	protein_coding	-0.998365	1.68621e-12	Negative
RP11-400N13.1	noncoding	CST4	protein_coding	-0.998365	1.68932e-12	Negative
SLC8A3	protein_coding	XLOC_012538	noncoding	-0.998363	1.69642e-12	Negative
STAG3L1	noncoding	UBL4B	protein_coding	-0.998362	1.70197e-12	Negative
RP11-45A16.4	noncoding	ENAH	protein_coding	-0.998359	1.71729e-12	Negative
ROCK2	protein_coding	XLOC_007896	noncoding	-0.998357	1.72573e-12	Negative
LOC100272217	noncoding	C14orf45	protein_coding	-0.998354	1.74083e-12	Negative
LINC00607	noncoding	ADRB1	protein_coding	-0.998353	1.74327e-12	Negative
RP11-1336O20.2	noncoding	LRRC46	protein_coding	-0.998353	1.74438e-12	Negative
CTC-228N24.1	noncoding	NRARP	protein_coding	-0.998347	1.77214e-12	Negative
RP11-90D4.2	noncoding	NWD1	protein_coding	-0.998342	1.79767e-12	Negative
AC007682.1	noncoding	DHRS9	protein_coding	-0.998342	1.79901e-12	Negative
XLOC_012083	noncoding	CLDN7	protein_coding	-0.99834	1.80833e-12	Negative
RP11-254K3.1	noncoding	FAM216B	protein_coding	-0.99834	1.80878e-12	Negative
ERRFI1	protein_coding	RP1-8B1.4	noncoding	-0.998337	1.82121e-12	Negative
REEP1	protein_coding	RP11-532F12.5	noncoding	-0.998336	1.82609e-12	Negative
KCNIP4	protein_coding	EFCAB1	noncoding	-0.998336	1.82854e-12	Negative
AC084117.3	noncoding	LRRC46	protein_coding	-0.998334	1.83809e-12	Negative
RP11-38H17.1	noncoding	DHRS9	protein_coding	-0.998331	1.85096e-12	Negative
XLOC_006928	noncoding	STEAP1	protein_coding	-0.998331	1.85163e-12	Negative
ALCAM	protein_coding	BC044655	noncoding	-0.998328	1.86429e-12	Negative
XLOC_004244	noncoding	DHRS9	protein_coding	-0.998328	1.86651e-12	Negative
XLOC_005119	noncoding	DYX1C1	protein_coding	-0.998325	1.87983e-12	Negative
LGALSL	protein_coding	XLOC_008992	noncoding	-0.998325	1.88072e-12	Negative
XLOC_004186	noncoding	CLDN4	protein_coding	-0.998325	1.88183e-12	Negative
STAG3L2	noncoding	SPA17	protein_coding	-0.998324	1.88427e-12	Negative
RP11-254K3.1	noncoding	CST2	protein_coding	-0.99832	1.9047e-12	Negative
RP11-400N13.1	noncoding	UGT1A3	protein_coding	-0.998319	1.91269e-12	Negative
XLOC_000595	noncoding	S100P	protein_coding	-0.998318	1.91736e-12	Negative
VLDLR	protein_coding	Z83851.1	noncoding	-0.998315	1.93312e-12	Negative
chr7:19668825-19689525	noncoding	CCL26	protein_coding	-0.998315	1.93356e-12	Negative
AC005162.3	noncoding	KRT7	protein_coding	-0.998314	1.93734e-12	Negative
LINC00607	noncoding	DYNLRB2	protein_coding	-0.998314	1.93801e-12	Negative
MTUS2	protein_coding	XLOC_012538	noncoding	-0.998313	1.94023e-12	Negative
RP11-254K3.1	noncoding	WDR69	protein_coding	-0.998313	1.94467e-12	Negative
AC024560.2	noncoding	FFAR2	protein_coding	-0.998312	1.94555e-12	Negative
RP11-38H17.1	noncoding	POSTN	protein_coding	-0.998312	1.94778e-12	Negative
U73167.7	noncoding	HCAR3	protein_coding	-0.998305	1.98397e-12	Negative
RP11-90D4.2	noncoding	TSPAN1	protein_coding	-0.9983	2.01239e-12	Negative
XLOC_005119	noncoding	RSPH1	protein_coding	-0.998299	2.01461e-12	Negative
STAG3L1	noncoding	ACTA2	protein_coding	-0.998295	2.03482e-12	Negative
CD164	protein_coding	GHRLOS	noncoding	-0.998294	2.04148e-12	Negative
RP11-778H2.1	noncoding	WDR69	protein_coding	-0.998293	2.04814e-12	Negative
HAS2-AS1	noncoding	FDCSP	protein_coding	-0.998289	2.07256e-12	Negative
LINC00607	noncoding	DENND2D	protein_coding	-0.998288	2.07345e-12	Negative
chr7:19668825-19689525	noncoding	UGT1A3	protein_coding	-0.998287	2.07967e-12	Negative
U73167.7	noncoding	TSPAN1	protein_coding	-0.998286	2.08678e-12	Negative
SLC8A3	protein_coding	XLOC_007896	noncoding	-0.998285	2.09321e-12	Negative
XLOC_004067	noncoding	AGR2	protein_coding	-0.998281	2.11209e-12	Negative
RP11-254K3.1	noncoding	ODF2L	protein_coding	-0.998281	2.11431e-12	Negative
STAG3L1	noncoding	LCA5L	protein_coding	-0.99828	2.11853e-12	Negative
IL6ST	protein_coding	RP11-38P22.2	noncoding	-0.998279	2.12363e-12	Negative
MED16	protein_coding	RP11-318C24.2	noncoding	-0.998278	2.1303e-12	Negative
RP11-1223D19.1	noncoding	IGJ	protein_coding	-0.998276	2.1434e-12	Negative
VEPH1	protein_coding	U47924.27	noncoding	-0.998275	2.14495e-12	Negative
ITK	protein_coding	Z83851.1	noncoding	-0.998275	2.14806e-12	Negative
CAV1	protein_coding	PSORS1C3	noncoding	-0.998274	2.15206e-12	Negative
XLOC_012083	noncoding	HCAR2	protein_coding	-0.998273	2.15805e-12	Negative
RP11-308B16.2	noncoding	ADH1C	protein_coding	-0.998272	2.16382e-12	Negative
HAS2-AS1	noncoding	FHAD1	protein_coding	-0.998269	2.1827e-12	Negative
TXNIP	protein_coding	XLOC_007896	noncoding	-0.998266	2.20024e-12	Negative
RP11-400N13.1	noncoding	AHR	protein_coding	-0.998263	2.21645e-12	Negative
RP13-726E6.2	noncoding	POSTN	protein_coding	-0.99826	2.23022e-12	Negative
RP11-38H17.1	noncoding	FAM216B	protein_coding	-0.99826	2.2311e-12	Negative
RP11-155G14.5	noncoding	SNCA	protein_coding	-0.99826	2.23488e-12	Negative
RP11-849I19.1	noncoding	FANK1	protein_coding	-0.998255	2.26308e-12	Negative
XLOC_005968	noncoding	CHST2	protein_coding	-0.998255	2.26397e-12	Negative
AC007682.1	noncoding	FDCSP	protein_coding	-0.998253	2.27329e-12	Negative
RP13-726E6.2	noncoding	CATSPERD	protein_coding	-0.99825	2.29017e-12	Negative
NEDD9	protein_coding	AC013264.2	noncoding	-0.998248	2.30482e-12	Negative
AC084117.3	noncoding	CPA3	protein_coding	-0.998246	2.31326e-12	Negative
EPS8	protein_coding	XLOC_011944	noncoding	-0.998246	2.31482e-12	Negative
LDHA	protein_coding	RP11-298J20.3	noncoding	-0.998245	2.31859e-12	Negative
AC007682.1	noncoding	CCDC88C	protein_coding	-0.998244	2.32525e-12	Negative
HAS2-AS1	noncoding	GUCY1A3	protein_coding	-0.998244	2.32747e-12	Negative
SGCE	protein_coding	BC028842	noncoding	-0.998243	2.32969e-12	Negative
CTD-2313N18.5	noncoding	RSPH1	protein_coding	-0.998243	2.33147e-12	Negative
HAS2-AS1	noncoding	CCL26	protein_coding	-0.99824	2.35034e-12	Negative
AC002456.2	noncoding	RSPH1	protein_coding	-0.998239	2.35678e-12	Negative
RP11-155G14.5	noncoding	PTGER3	protein_coding	-0.998238	2.363e-12	Negative
chr7:19668825-19689525	noncoding	POSTN	protein_coding	-0.998237	2.36944e-12	Negative
IBSP	protein_coding	BC028842	noncoding	-0.998234	2.38787e-12	Negative
RP11-254K3.1	noncoding	CD44	protein_coding	-0.998233	2.39475e-12	Negative
ROCK2	protein_coding	TPRG1-AS1	noncoding	-0.998232	2.39586e-12	Negative
MT1DP	noncoding	CMYA5	protein_coding	-0.998227	2.42917e-12	Negative
AC084117.3	noncoding	DENND2D	protein_coding	-0.998226	2.43561e-12	Negative
RP11-400K9.4	noncoding	CXCL12	protein_coding	-0.998225	2.44205e-12	Negative
DPP6	protein_coding	PSORS1C3	noncoding	-0.998221	2.4678e-12	Negative
OPRK1	protein_coding	EFCAB1	noncoding	-0.998221	2.46936e-12	Negative
CTD-2311M21.2	noncoding	C8orf47	protein_coding	-0.99822	2.47535e-12	Negative
RP11-254K3.1	noncoding	FAM166B	protein_coding	-0.998218	2.48424e-12	Negative
FAM86DP	noncoding	ADRB1	protein_coding	-0.998218	2.48512e-12	Negative
ELAVL2	protein_coding	BC028842	noncoding	-0.998218	2.48579e-12	Negative
RP11-1060J15.4	noncoding	S100A9	protein_coding	-0.998217	2.49134e-12	Negative
RP11-155G14.5	noncoding	C11orf70	protein_coding	-0.998217	2.49356e-12	Negative
RP11-254K3.1	noncoding	NRARP	protein_coding	-0.998217	2.49445e-12	Negative
RP4-545C24.1	noncoding	SNCA	protein_coding	-0.998212	2.52065e-12	Negative
RP11-810P8.1	noncoding	DMBT1	protein_coding	-0.998211	2.52709e-12	Negative
RP11-778H2.1	noncoding	FAM166B	protein_coding	-0.99821	2.53308e-12	Negative
CTD-2311M21.2	noncoding	LRRC46	protein_coding	-0.99821	2.53508e-12	Negative
XLOC_005119	noncoding	IQCG	protein_coding	-0.998209	2.54152e-12	Negative
XLOC_013222	noncoding	RPGR	protein_coding	-0.998207	2.55262e-12	Negative
AK001057	noncoding	EYA1	protein_coding	-0.998206	2.56062e-12	Negative
XLOC_000424	noncoding	CLDN7	protein_coding	-0.998205	2.56484e-12	Negative
AC084117.3	noncoding	LRRC10B	protein_coding	-0.998205	2.56684e-12	Negative
XLOC_000424	noncoding	F3	protein_coding	-0.998201	2.5957e-12	Negative
GPC1	protein_coding	XLOC_010305	noncoding	-0.9982	2.59881e-12	Negative
U73167.7	noncoding	LRRIQ1	protein_coding	-0.9982	2.60147e-12	Negative
AX747547	noncoding	SYTL2	protein_coding	-0.9982	2.60236e-12	Negative
U73167.7	noncoding	HCAR2	protein_coding	-0.998199	2.60858e-12	Negative
LINC00607	noncoding	CRYM	protein_coding	-0.998197	2.61702e-12	Negative
AC084117.3	noncoding	CATSPERD	protein_coding	-0.998196	2.62745e-12	Negative
LINC00607	noncoding	CPA3	protein_coding	-0.998192	2.65299e-12	Negative
HILPDA	protein_coding	FW340055	noncoding	-0.998192	2.65454e-12	Negative
RP11-143E21.7	noncoding	XCL1	protein_coding	-0.998191	2.66054e-12	Negative
XLOC_007927	noncoding	DYNLRB2	protein_coding	-0.998191	2.6612e-12	Negative
chr7:19668825-19689525	noncoding	DHRS9	protein_coding	-0.998191	2.66209e-12	Negative
FBN3	protein_coding	EFCAB1	noncoding	-0.99819	2.66365e-12	Negative
CTD-2311M21.2	noncoding	AKAP14	protein_coding	-0.998188	2.67697e-12	Negative
RP11-407B7.1	noncoding	RPS6KA5	protein_coding	-0.998186	2.69051e-12	Negative
NOG	protein_coding	RP1-8B1.4	noncoding	-0.99818	2.72982e-12	Negative
ITGB8	protein_coding	RP11-1C1.7	noncoding	-0.99818	2.73026e-12	Negative
XLOC_005079	noncoding	AHR	protein_coding	-0.99818	2.73137e-12	Negative
AC104135.3	noncoding	NRARP	protein_coding	-0.998178	2.74469e-12	Negative
XLOC_005119	noncoding	VMO1	protein_coding	-0.998178	2.74869e-12	Negative
RP11-778H2.1	noncoding	KRT23	protein_coding	-0.998177	2.75358e-12	Negative
RP11-438D8.2	noncoding	EMCN	protein_coding	-0.998174	2.77423e-12	Negative
RP11-666A20.4	noncoding	PARP8	protein_coding	-0.998174	2.77645e-12	Negative
RP11-254K3.1	noncoding	UGT1A3	protein_coding	-0.998172	2.78666e-12	Negative
AC024560.3	noncoding	PINX1	protein_coding	-0.998172	2.79021e-12	Negative
XLOC_005119	noncoding	UGT1A3	protein_coding	-0.99817	2.79998e-12	Negative
RP11-1336O20.2	noncoding	C10orf107	protein_coding	-0.998169	2.80798e-12	Negative
RP11-143E21.7	noncoding	IFI16	protein_coding	-0.998168	2.81242e-12	Negative
XLOC_002733	noncoding	XCL1	protein_coding	-0.998167	2.81863e-12	Negative
RRP1B	protein_coding	XLOC_010305	noncoding	-0.998167	2.81974e-12	Negative
KCNIP4	protein_coding	XLOC_011944	noncoding	-0.998167	2.82019e-12	Negative
XLOC_013222	noncoding	FAM83B	protein_coding	-0.998167	2.82507e-12	Negative
DNAJC30	protein_coding	BC028842	noncoding	-0.998165	2.83285e-12	Negative
RP11-1336O20.2	noncoding	SNCA	protein_coding	-0.998164	2.84461e-12	Negative
AC015987.1	noncoding	ADH1C	protein_coding	-0.99816	2.86704e-12	Negative
RP11-849N15.2	noncoding	RAB27B	protein_coding	-0.998157	2.89102e-12	Negative
RP11-810P8.1	noncoding	UGT1A3	protein_coding	-0.998156	2.89546e-12	Negative
GADD45B	protein_coding	RP11-404P21.5	noncoding	-0.998156	2.89546e-12	Negative
XLOC_004244	noncoding	ADRB1	protein_coding	-0.998156	2.90123e-12	Negative
RP11-90D4.2	noncoding	C10orf107	protein_coding	-0.998155	2.90568e-12	Negative
PARD3B	protein_coding	RP11-264F23.4	noncoding	-0.998155	2.90568e-12	Negative
chr7:19668825-19689525	noncoding	CD44	protein_coding	-0.998154	2.91234e-12	Negative
XLOC_004244	noncoding	CCL26	protein_coding	-0.998152	2.92988e-12	Negative
AC226119.4	noncoding	HCAR3	protein_coding	-0.998151	2.9341e-12	Negative
KCNIP4	protein_coding	RP11-404P21.5	noncoding	-0.99815	2.93832e-12	Negative
GS1-526D21.5	noncoding	FAM154B	protein_coding	-0.998148	2.95231e-12	Negative
RP11-736K20.5	noncoding	TACSTD2	protein_coding	-0.998146	2.96696e-12	Negative
XLOC_007927	noncoding	DENND2D	protein_coding	-0.998146	2.97096e-12	Negative
LDHA	protein_coding	CTD-3080F16.3	noncoding	-0.998145	2.98028e-12	Negative
RP13-317D12.3	noncoding	PLCL2	protein_coding	-0.998144	2.9825e-12	Negative
NOG	protein_coding	AC013264.2	noncoding	-0.998143	2.99183e-12	Negative
RP11-155G14.5	noncoding	CH25H	protein_coding	-0.998135	3.05023e-12	Negative
RP11-1336O20.2	noncoding	NWD1	protein_coding	-0.998135	3.05245e-12	Negative
SYNM	protein_coding	RP4-555L14.5	noncoding	-0.998134	3.05866e-12	Negative
AC005162.3	noncoding	IGJ	protein_coding	-0.998132	3.07487e-12	Negative
AC002456.2	noncoding	FAM154B	protein_coding	-0.998131	3.07665e-12	Negative
DQ592442	noncoding	PPAP2B	protein_coding	-0.998131	3.08331e-12	Negative
TUBB2A	noncoding	ACTA2	protein_coding	-0.99813	3.08864e-12	Negative
BC033241	noncoding	CLDN7	protein_coding	-0.99813	3.09042e-12	Negative
XLOC_006928	noncoding	FDCSP	protein_coding	-0.998129	3.09575e-12	Negative
XLOC_006928	noncoding	AHR	protein_coding	-0.998129	3.09708e-12	Negative
XLOC_004244	noncoding	CASP1	protein_coding	-0.998128	3.10374e-12	Negative
GADD45B	protein_coding	RP11-702H23.6	noncoding	-0.998128	3.10463e-12	Negative
SHISA6	protein_coding	PSORS1C3	noncoding	-0.998125	3.12284e-12	Negative
XLOC_005119	noncoding	TEKT1	protein_coding	-0.99812	3.15925e-12	Negative
AX746535	noncoding	ANKRD35	protein_coding	-0.99812	3.16458e-12	Negative
RP11-38H17.1	noncoding	FAM183A	protein_coding	-0.998118	3.1759e-12	Negative
RP11-317P15.5	noncoding	F3	protein_coding	-0.998116	3.189e-12	Negative
RP1-60O19.2	noncoding	ARL4A	protein_coding	-0.998115	3.20322e-12	Negative
AC003986.7	noncoding	NRARP	protein_coding	-0.998111	3.23341e-12	Negative
RP11-849I19.1	noncoding	AMY1B	protein_coding	-0.99811	3.23652e-12	Negative
GPM6A	noncoding	CH25H	protein_coding	-0.998109	3.24252e-12	Negative
TES	protein_coding	XLOC_005563	noncoding	-0.998108	3.25295e-12	Negative
KIAA0232	protein_coding	AL928768.3	noncoding	-0.998108	3.25673e-12	Negative
RP11-155G14.5	noncoding	NQO1	protein_coding	-0.998107	3.2605e-12	Negative
NTRK2	protein_coding	EFCAB1	noncoding	-0.998101	3.30735e-12	Negative
XLOC_007927	noncoding	LRRC46	protein_coding	-0.998101	3.31157e-12	Negative
FAM86DP	noncoding	RSPH1	protein_coding	-0.9981	3.31379e-12	Negative
RP11-810P8.1	noncoding	NRARP	protein_coding	-0.998099	3.32268e-12	Negative
CD99P1	noncoding	MPZL2	protein_coding	-0.998098	3.33356e-12	Negative
AC084117.3	noncoding	TEKT1	protein_coding	-0.998098	3.33356e-12	Negative
RHOD	protein_coding	CDKN2B-AS1	noncoding	-0.998097	3.34044e-12	Negative
RP11-1336O20.2	noncoding	C9orf116	protein_coding	-0.998096	3.34488e-12	Negative
ADARB1	protein_coding	XLOC_000346	noncoding	-0.998094	3.35953e-12	Negative
RP11-849I19.1	noncoding	LRRC46	protein_coding	-0.998094	3.36464e-12	Negative
XLOC_004244	noncoding	KRT23	protein_coding	-0.998093	3.37175e-12	Negative
CTC-228N24.1	noncoding	FAM166B	protein_coding	-0.998093	3.37375e-12	Negative
RBMS3-AS3	noncoding	CD55	protein_coding	-0.998092	3.3813e-12	Negative
HAS2-AS1	noncoding	SCGB1A1	protein_coding	-0.99809	3.39595e-12	Negative
RP13-726E6.2	noncoding	CD44	protein_coding	-0.998089	3.40616e-12	Negative
RP11-849I19.1	noncoding	C10orf107	protein_coding	-0.998088	3.4146e-12	Negative
RP13-726E6.2	noncoding	CH25H	protein_coding	-0.998087	3.41549e-12	Negative
BC033241	noncoding	OSCP1	protein_coding	-0.998087	3.41815e-12	Negative
LINC00607	noncoding	UGT1A3	protein_coding	-0.998087	3.42326e-12	Negative
LOC285768	noncoding	AGR2	protein_coding	-0.998086	3.42371e-12	Negative
AC002456.2	noncoding	LRRC10B	protein_coding	-0.998086	3.42859e-12	Negative
RP11-155G14.5	noncoding	CATSPERD	protein_coding	-0.998086	3.43059e-12	Negative
CAP2	protein_coding	RP11-265N6.1	noncoding	-0.998084	3.4448e-12	Negative
chr7:19668825-19689525	noncoding	FDCSP	protein_coding	-0.998083	3.44835e-12	Negative
XLOC_000424	noncoding	SCPEP1	protein_coding	-0.998083	3.45546e-12	Negative
XLOC_001338	noncoding	NFIB	protein_coding	-0.998082	3.4559e-12	Negative
MT1JP	noncoding	SPATA17	protein_coding	-0.998081	3.471e-12	Negative
SHISA6	protein_coding	XLOC_012538	noncoding	-0.99808	3.47633e-12	Negative
AC002456.2	noncoding	UGT1A3	protein_coding	-0.998079	3.48122e-12	Negative
RP11-1336O20.2	noncoding	KCNJ15	protein_coding	-0.998078	3.49587e-12	Negative
GLRA3	protein_coding	U47924.27	noncoding	-0.998076	3.50786e-12	Negative
TCEAL7	protein_coding	LOC284260	noncoding	-0.998072	3.54428e-12	Negative
KIAA0232	protein_coding	RP11-426C22.5	noncoding	-0.998069	3.56559e-12	Negative
CTC-367J11.1	noncoding	KIAA1377	protein_coding	-0.998068	3.57758e-12	Negative
RHOBTB2	protein_coding	TPT1-AS1	noncoding	-0.998067	3.58091e-12	Negative
CD164	protein_coding	AC013264.2	noncoding	-0.998065	3.59579e-12	Negative
XLOC_004244	noncoding	C9orf24	protein_coding	-0.998064	3.60934e-12	Negative
AF186192.1	noncoding	WDR54	protein_coding	-0.998062	3.62066e-12	Negative
RP11-308B16.2	noncoding	SCGB1A1	protein_coding	-0.998062	3.62332e-12	Negative
SEC31A	protein_coding	LOC284260	noncoding	-0.998061	3.62999e-12	Negative
CTD-2501M5.1	noncoding	FDCSP	protein_coding	-0.998059	3.65352e-12	Negative
LEPR	protein_coding	GPX2	noncoding	-0.998058	3.66018e-12	Negative
RP11-111M22.3	noncoding	CHST15	protein_coding	-0.998057	3.66818e-12	Negative
RP13-726E6.2	noncoding	HPDL	protein_coding	-0.998055	3.68239e-12	Negative
XLOC_002733	noncoding	S100A9	protein_coding	-0.998055	3.68794e-12	Negative
FAM86DP	noncoding	S100P	protein_coding	-0.998054	3.69393e-12	Negative
RP11-45A16.4	noncoding	CCDC74A	protein_coding	-0.998054	3.69615e-12	Negative
NEDD9	protein_coding	LOC100133445	noncoding	-0.998053	3.70171e-12	Negative
UGP2	protein_coding	XLOC_007896	noncoding	-0.998052	3.71125e-12	Negative
CD164	protein_coding	RP11-345L23.1	noncoding	-0.998051	3.72102e-12	Negative
RP11-254K3.1	noncoding	SNTN	protein_coding	-0.998051	3.72258e-12	Negative
RP11-75C9.1	noncoding	GCLM	protein_coding	-0.998048	3.74456e-12	Negative
XLOC_005968	noncoding	IL8	protein_coding	-0.998046	3.76521e-12	Negative
CTD-2313N18.2	noncoding	AMY1C	protein_coding	-0.998043	3.78497e-12	Negative
RP11-400N13.1	noncoding	KRT23	protein_coding	-0.998043	3.78542e-12	Negative
LOC285768	noncoding	CST1	protein_coding	-0.998043	3.79075e-12	Negative
RP11-267L5.1	noncoding	C15orf59	protein_coding	-0.998042	3.7943e-12	Negative
RP11-155G14.5	noncoding	CFP	protein_coding	-0.99804	3.80984e-12	Negative
ATP9A	protein_coding	RP11-473M20.11	noncoding	-0.998039	3.82405e-12	Negative
RP11-849I19.1	noncoding	SNCA	protein_coding	-0.998038	3.82872e-12	Negative
RP11-254K3.1	noncoding	ADRA2A	protein_coding	-0.998035	3.85647e-12	Negative
XLOC_004067	noncoding	ADRA2A	protein_coding	-0.998032	3.8809e-12	Negative
LINC00607	noncoding	CFP	protein_coding	-0.998032	3.88711e-12	Negative
CTD-2313N18.5	noncoding	MANF	protein_coding	-0.998028	3.91776e-12	Negative
SAMD5	protein_coding	GHRLOS	noncoding	-0.998028	3.92442e-12	Negative
ASPH	protein_coding	TPRG1-AS1	noncoding	-0.998026	3.93774e-12	Negative
CD99P1	noncoding	LYSMD2	protein_coding	-0.998026	3.94196e-12	Negative
XLOC_004244	noncoding	EYA4	protein_coding	-0.998023	3.96772e-12	Negative
ZNF705E	noncoding	MYH11	protein_coding	-0.998022	3.97105e-12	Negative
RP11-109D24.1	noncoding	ZNF837	protein_coding	-0.998022	3.97193e-12	Negative
RP13-726E6.2	noncoding	CFP	protein_coding	-0.99802	3.99147e-12	Negative
AC007682.1	noncoding	NRARP	protein_coding	-0.99802	3.99414e-12	Negative
PALLD	protein_coding	PMSP	noncoding	-0.998019	4.00391e-12	Negative
RP11-778H2.1	noncoding	CCL26	protein_coding	-0.998018	4.00702e-12	Negative
CD99P1	noncoding	SLC31A1	protein_coding	-0.998018	4.01368e-12	Negative
NOG	protein_coding	LOC100133445	noncoding	-0.998017	4.01901e-12	Negative
AC084117.3	noncoding	AKAP14	protein_coding	-0.998016	4.02434e-12	Negative
RP11-308B16.2	noncoding	CD44	protein_coding	-0.998015	4.03411e-12	Negative
SACM1L	protein_coding	RP4-594I10.2	noncoding	-0.998015	4.03544e-12	Negative
SAMD4A	protein_coding	RP4-555L14.5	noncoding	-0.998015	4.03699e-12	Negative
RP11-90D4.2	noncoding	NTS	protein_coding	-0.998015	4.03855e-12	Negative
RP11-1336O20.2	noncoding	STOX1	protein_coding	-0.998014	4.04676e-12	Negative
XLOC_005119	noncoding	CCDC173	protein_coding	-0.998013	4.05276e-12	Negative
BC033241	noncoding	AMY1C	protein_coding	-0.998011	4.07141e-12	Negative
FAM134B	protein_coding	XLOC_012538	noncoding	-0.998011	4.07319e-12	Negative
CDK18	protein_coding	CBR3-AS1	noncoding	-0.99801	4.08251e-12	Negative
RP11-90D4.2	noncoding	CPA3	protein_coding	-0.99801	4.08629e-12	Negative
LINC00607	noncoding	VMO1	protein_coding	-0.998008	4.0985e-12	Negative
MED16	protein_coding	RP11-307C12.11	noncoding	-0.998008	4.10383e-12	Negative
RP11-178G16.2	noncoding	FLI1	protein_coding	-0.998007	4.10827e-12	Negative
ADAMTSL1	protein_coding	Z83851.1	noncoding	-0.998006	4.11826e-12	Negative
GPR64	protein_coding	XLOC_005563	noncoding	-0.998005	4.12825e-12	Negative
U73167.7	noncoding	RIBC2	protein_coding	-0.998002	4.15556e-12	Negative
KCNIP4	protein_coding	RP11-800A3.4	noncoding	-0.998002	4.15779e-12	Negative
RP11-2E11.5	noncoding	SCPEP1	protein_coding	-0.998002	4.16001e-12	Negative
XLOC_007927	noncoding	S100P	protein_coding	-0.998002	4.16112e-12	Negative
AC084117.3	noncoding	VSIG2	protein_coding	-0.998001	4.16289e-12	Negative
GSTA1	protein_coding	TUBA4B	noncoding	0.998001	4.16378e-12	Positive
ADAMTSL1	protein_coding	XLOC_004128	noncoding	0.998002	4.16223e-12	Positive
AP3B2	protein_coding	CTB-161A2.3	noncoding	0.998002	4.16001e-12	Positive
PCDH1	protein_coding	RP11-13L2.4	noncoding	0.998003	4.15157e-12	Positive
PLEKHG4B	protein_coding	MGC16121	noncoding	0.998003	4.15046e-12	Positive
IBSP	protein_coding	XLOC_011172	noncoding	0.998003	4.15046e-12	Positive
LRRC10B	protein_coding	RP11-298J20.3	noncoding	0.998003	4.14779e-12	Positive
ARHGAP31	protein_coding	WDFY3-AS2	noncoding	0.998004	4.13714e-12	Positive
IGFBP2	protein_coding	XLOC_007004	noncoding	0.998004	4.13602e-12	Positive
NT5DC3	protein_coding	XLOC_003202	noncoding	0.998004	4.13536e-12	Positive
SCUBE1	protein_coding	XLOC_003416	noncoding	0.998005	4.13158e-12	Positive
LIX1	protein_coding	AC006445.8	noncoding	0.998006	4.11937e-12	Positive
SNRPN	protein_coding	CHIT1	noncoding	0.998007	4.11227e-12	Positive
YIPF5	protein_coding	AC004383.4	noncoding	0.998008	4.10072e-12	Positive
TMEM200C	protein_coding	WDFY3-AS2	noncoding	0.998008	4.0985e-12	Positive
EFNA1	protein_coding	AX747547	noncoding	0.998009	4.09184e-12	Positive
FSD1L	protein_coding	ANKRD30BP2	noncoding	0.998009	4.08962e-12	Positive
GPER	protein_coding	CSPG4P5	noncoding	0.998009	4.08917e-12	Positive
GADD45B	protein_coding	RP11-90D4.2	noncoding	0.99801	4.08296e-12	Positive
ABRACL	protein_coding	HCP5	noncoding	0.99801	4.08251e-12	Positive
ITK	protein_coding	XLOC_003202	noncoding	0.998011	4.06963e-12	Positive
OPRK1	protein_coding	XLOC_006928	noncoding	0.998013	4.05942e-12	Positive
MLF1	protein_coding	EFCAB1	noncoding	0.998013	4.05831e-12	Positive
SFTPC	protein_coding	EFCAB1	noncoding	0.998013	4.05764e-12	Positive
SYNM	protein_coding	WDFY3-AS2	noncoding	0.998014	4.0461e-12	Positive
MFGE8	protein_coding	RP11-736K20.5	noncoding	0.998014	4.04343e-12	Positive
CD44	protein_coding	RP11-298J20.3	noncoding	0.998016	4.03144e-12	Positive
MFAP3L	protein_coding	RP11-2E11.5	noncoding	0.998016	4.02833e-12	Positive
CCL26	protein_coding	XLOC_011944	noncoding	0.998016	4.02722e-12	Positive
GALNT3	protein_coding	RP1-60O19.2	noncoding	0.998016	4.025e-12	Positive
IGFBP1	protein_coding	PLCD1	noncoding	0.998017	4.02123e-12	Positive
SMOC2	protein_coding	RP11-317P15.5	noncoding	0.998017	4.01634e-12	Positive
STMN2	protein_coding	XLOC_001980	noncoding	0.998019	4.00324e-12	Positive
JPH2	protein_coding	AK123617	noncoding	0.998019	3.99991e-12	Positive
LGALSL	protein_coding	AC004383.4	noncoding	0.998019	3.99791e-12	Positive
SYNE1	protein_coding	AK123617	noncoding	0.99802	3.99192e-12	Positive
CLDN19	protein_coding	MIAT	noncoding	0.99802	3.98814e-12	Positive
NPFFR2	protein_coding	RP11-65D13.1	noncoding	0.998021	3.98614e-12	Positive
APBA1	protein_coding	XLOC_004120	noncoding	0.998021	3.98126e-12	Positive
SEMA3E	protein_coding	AK094413	noncoding	0.998023	3.96549e-12	Positive
SOBP	protein_coding	MIR210HG	noncoding	0.998023	3.96128e-12	Positive
KIF21A	protein_coding	RP11-263K19.4	noncoding	0.998024	3.95906e-12	Positive
C18orf54	protein_coding	RP11-408H20.1	noncoding	0.998024	3.95906e-12	Positive
ETV1	protein_coding	RP11-65D13.1	noncoding	0.998025	3.95106e-12	Positive
S100P	protein_coding	TUBA4B	noncoding	0.998025	3.94573e-12	Positive
ZNF385D	protein_coding	RP11-408H20.1	noncoding	0.998025	3.94529e-12	Positive
NDNF	protein_coding	LINC00475	noncoding	0.998025	3.94307e-12	Positive
SNTG1	protein_coding	WI2-87327B8.1	noncoding	0.998026	3.94196e-12	Positive
GABRB2	protein_coding	XLOC_011178	noncoding	0.998026	3.94129e-12	Positive
PALLD	protein_coding	AC226119.4	noncoding	0.998027	3.93108e-12	Positive
ITPKC	protein_coding	XLOC_001980	noncoding	0.998027	3.92841e-12	Positive
SLAMF7	protein_coding	RP11-1C1.7	noncoding	0.998028	3.91687e-12	Positive
TMEM163	protein_coding	AK123617	noncoding	0.998029	3.91465e-12	Positive
CRYM	protein_coding	RP1-8B1.4	noncoding	0.99803	3.90621e-12	Positive
NOG	protein_coding	GS1-526D21.5	noncoding	0.99803	3.90621e-12	Positive
C10orf107	protein_coding	XLOC_012538	noncoding	0.99803	3.9031e-12	Positive
EGLN1	protein_coding	RP11-1223D19.1	noncoding	0.99803	3.90088e-12	Positive
FSD1L	protein_coding	RP11-597M12.1	noncoding	0.998031	3.89333e-12	Positive
TMIE	protein_coding	XLOC_011180	noncoding	0.998031	3.89022e-12	Positive
RGS18	protein_coding	FW340055	noncoding	0.998032	3.88556e-12	Positive
PLEKHG4B	protein_coding	XLOC_014080	noncoding	0.998032	3.88556e-12	Positive
PRELP	protein_coding	LOC441204	noncoding	0.998032	3.88556e-12	Positive
FBN3	protein_coding	RP11-778H2.1	noncoding	0.998032	3.88134e-12	Positive
HCAR2	protein_coding	FLJ26850	noncoding	0.998033	3.87113e-12	Positive
SGCE	protein_coding	AC104135.3	noncoding	0.998034	3.86713e-12	Positive
ITK	protein_coding	MT1DP	noncoding	0.998034	3.86491e-12	Positive
NRARP	protein_coding	XLOC_011944	noncoding	0.998034	3.86269e-12	Positive
GPR64	protein_coding	AC084117.3	noncoding	0.998034	3.86224e-12	Positive
ADH1C	protein_coding	EFCAB1	noncoding	0.998035	3.85381e-12	Positive
TNIK	protein_coding	AK022898	noncoding	0.998035	3.85381e-12	Positive
ZNF727	protein_coding	AF186192.1	noncoding	0.998036	3.85025e-12	Positive
GPR171	protein_coding	XLOC_011944	noncoding	0.998037	3.84226e-12	Positive
ATP9A	protein_coding	AC006445.8	noncoding	0.998037	3.84071e-12	Positive
ALPK2	protein_coding	PDZK1P1	noncoding	0.998037	3.8396e-12	Positive
LRRFIP2	protein_coding	PLCD1	noncoding	0.998037	3.83915e-12	Positive
LOC389831	protein_coding	BC033241	noncoding	0.998038	3.83382e-12	Positive
TAS2R4	protein_coding	RP11-65J21.3	noncoding	0.998039	3.8245e-12	Positive
CAPS	protein_coding	XLOC_011944	noncoding	0.99804	3.81339e-12	Positive
SLAMF6	protein_coding	GS1-393G12.12	noncoding	0.99804	3.81095e-12	Positive
IGFBP2	protein_coding	PHKA2-AS1	noncoding	0.99804	3.81095e-12	Positive
KCNIP4	protein_coding	RP11-317P15.5	noncoding	0.99804	3.81029e-12	Positive
GOLIM4	protein_coding	MT1JP	noncoding	0.998041	3.80718e-12	Positive
MTUS2	protein_coding	CTD-2313N18.2	noncoding	0.998042	3.79474e-12	Positive
SHISA6	protein_coding	RP11-1223D19.1	noncoding	0.998043	3.78386e-12	Positive
LRP2	protein_coding	RP11-23P13.6	noncoding	0.998045	3.77143e-12	Positive
JPH2	protein_coding	LOC441204	noncoding	0.998045	3.76676e-12	Positive
NRARP	protein_coding	U47924.27	noncoding	0.998046	3.76366e-12	Positive
EFCAB1	protein_coding	SLC7A7	noncoding	0.998048	3.74634e-12	Positive
PLXNA2	protein_coding	RP11-438D8.2	noncoding	0.998048	3.74634e-12	Positive
GOLM1	protein_coding	RP11-72I8.1	noncoding	0.998049	3.73435e-12	Positive
ENPP1	protein_coding	AK123617	noncoding	0.998049	3.73235e-12	Positive
T	protein_coding	LINC00607	noncoding	0.99805	3.72613e-12	Positive
USH2A	protein_coding	CTD-2501M5.1	noncoding	0.99805	3.72324e-12	Positive
RSPH9	protein_coding	RP11-872J21.3	noncoding	0.998051	3.72258e-12	Positive
GYG1	protein_coding	AC079776.2	noncoding	0.998051	3.71947e-12	Positive
C1orf114	protein_coding	ABCC6P1	noncoding	0.998053	3.70215e-12	Positive
SFTPC	protein_coding	XLOC_007896	noncoding	0.998053	3.69704e-12	Positive
FIGN	protein_coding	CTB-37A13.1	noncoding	0.998054	3.69615e-12	Positive
FSD1L	protein_coding	RP11-1C1.7	noncoding	0.998056	3.67528e-12	Positive
HFE	protein_coding	PWRN1	noncoding	0.998058	3.66063e-12	Positive
CH25H	protein_coding	EFCAB2	noncoding	0.998058	3.65663e-12	Positive
REEP1	protein_coding	AC091729.7	noncoding	0.998058	3.65485e-12	Positive
UGT1A3	protein_coding	RP11-800A3.4	noncoding	0.99806	3.64198e-12	Positive
CPA3	protein_coding	EFCAB1	noncoding	0.998062	3.62887e-12	Positive
CDHR3	protein_coding	RP1-8B1.4	noncoding	0.998062	3.62776e-12	Positive
KCNIP4	protein_coding	LOC100506497	noncoding	0.998062	3.62466e-12	Positive
PLEKHH2	protein_coding	AC005013.5	noncoding	0.998062	3.62421e-12	Positive
RBMS3	protein_coding	XLOC_003201	noncoding	0.998062	3.62421e-12	Positive
IQCG	protein_coding	RP11-298J20.3	noncoding	0.998062	3.62377e-12	Positive
FN1	protein_coding	TPTEP1	noncoding	0.998062	3.62332e-12	Positive
TPD52L2	protein_coding	RP11-75C9.1	noncoding	0.998062	3.62177e-12	Positive
TFCP2L1	protein_coding	U47924.27	noncoding	0.998062	3.62133e-12	Positive
PEBP4	protein_coding	RP11-354M20.3	noncoding	0.998063	3.61489e-12	Positive
NCOR2	protein_coding	AC006445.8	noncoding	0.998063	3.61378e-12	Positive
VLDLR	protein_coding	RP1-60O19.2	noncoding	0.998064	3.61133e-12	Positive
ZNF711	protein_coding	PDZK1P1	noncoding	0.998064	3.60822e-12	Positive
CPA3	protein_coding	RP11-298J20.3	noncoding	0.998065	3.60134e-12	Positive
ZNF532	protein_coding	RP5-842K16.1	noncoding	0.998066	3.59446e-12	Positive
FN1	protein_coding	BC033241	noncoding	0.998066	3.58891e-12	Positive
MARVELD3	protein_coding	RP11-263K19.4	noncoding	0.998067	3.58646e-12	Positive
LIMCH1	protein_coding	RP11-390P2.4	noncoding	0.998067	3.58491e-12	Positive
LOC389831	protein_coding	U73167.7	noncoding	0.998067	3.58424e-12	Positive
PITPNM3	protein_coding	LOC100129961	noncoding	0.998067	3.58336e-12	Positive
ENOX1	protein_coding	RP1-8B1.4	noncoding	0.998069	3.56604e-12	Positive
PPEF1	protein_coding	BC028670	noncoding	0.998069	3.5647e-12	Positive
NDN	protein_coding	AK096159	noncoding	0.99807	3.55405e-12	Positive
C3orf15	protein_coding	LOC100133445	noncoding	0.998071	3.55027e-12	Positive
LOC389831	protein_coding	CTD-2313N18.2	noncoding	0.998071	3.54916e-12	Positive
CDR2	protein_coding	RP11-72I8.1	noncoding	0.998072	3.54472e-12	Positive
GABRA2	protein_coding	RP11-243M5.1	noncoding	0.998072	3.54228e-12	Positive
MFAP3L	protein_coding	AC006445.8	noncoding	0.998073	3.53695e-12	Positive
CH25H	protein_coding	XLOC_012538	noncoding	0.998073	3.53584e-12	Positive
ANO2	protein_coding	RP11-434D2.11	noncoding	0.998073	3.5314e-12	Positive
RCAN1	protein_coding	CTB-37A13.1	noncoding	0.998074	3.52696e-12	Positive
LRRC46	protein_coding	PSORS1C3	noncoding	0.998075	3.5203e-12	Positive
LRRC46	protein_coding	LOC100133445	noncoding	0.998075	3.5183e-12	Positive
DENND2D	protein_coding	RP11-298J20.3	noncoding	0.998076	3.50941e-12	Positive
SOX5	protein_coding	RP11-163E9.2	noncoding	0.998078	3.48899e-12	Positive
SFN	protein_coding	U47924.27	noncoding	0.99808	3.47877e-12	Positive
VSIG2	protein_coding	XLOC_012538	noncoding	0.99808	3.47233e-12	Positive
PITPNM3	protein_coding	U73167.7	noncoding	0.998081	3.47011e-12	Positive
LIMCH1	protein_coding	AC004980.7	noncoding	0.998081	3.46656e-12	Positive
SORCS1	protein_coding	PHKA2-AS1	noncoding	0.998081	3.46434e-12	Positive
MYZAP	protein_coding	RP11-736K20.5	noncoding	0.998082	3.46034e-12	Positive
FMOD	protein_coding	AC006445.8	noncoding	0.998083	3.45368e-12	Positive
CPA3	protein_coding	XLOC_012538	noncoding	0.998083	3.45213e-12	Positive
APOBEC3H	protein_coding	KIR3DP1	noncoding	0.998083	3.45013e-12	Positive
SYNM	protein_coding	XLOC_007004	noncoding	0.998085	3.43903e-12	Positive
ZBTB49	protein_coding	AC005013.5	noncoding	0.998085	3.43858e-12	Positive
GJA1	protein_coding	CTC-367J11.1	noncoding	0.998086	3.42903e-12	Positive
SPOCK3	protein_coding	AC003986.7	noncoding	0.998086	3.4257e-12	Positive
GLIPR1	protein_coding	XLOC_000424	noncoding	0.998087	3.42326e-12	Positive
CPNE6	protein_coding	XLOC_011173	noncoding	0.998087	3.42215e-12	Positive
FLRT3	protein_coding	MAGI2-AS3	noncoding	0.998087	3.4166e-12	Positive
ITGA3	protein_coding	CTC-367J11.1	noncoding	0.998088	3.41416e-12	Positive
GPR133	protein_coding	BC028670	noncoding	0.998089	3.40461e-12	Positive
CST1	protein_coding	U47924.27	noncoding	0.99809	3.39728e-12	Positive
KCNJ15	protein_coding	RP11-131N11.4	noncoding	0.998091	3.38751e-12	Positive
YEATS2	protein_coding	TUG1	noncoding	0.998092	3.37641e-12	Positive
RIBC2	protein_coding	RP1-8B1.4	noncoding	0.998093	3.37508e-12	Positive
SLC4A2	protein_coding	NOP14-AS1	noncoding	0.998093	3.3713e-12	Positive
ADRB1	protein_coding	RNF157-AS1	noncoding	0.998094	3.36131e-12	Positive
GADD45B	protein_coding	AC015987.1	noncoding	0.998096	3.34865e-12	Positive
C9orf24	protein_coding	XLOC_011944	noncoding	0.998096	3.34577e-12	Positive
PPEF1	protein_coding	XLOC_007004	noncoding	0.998097	3.33911e-12	Positive
GPR64	protein_coding	U73167.7	noncoding	0.998097	3.33866e-12	Positive
APP	protein_coding	RP11-20I23.8	noncoding	0.998098	3.33555e-12	Positive
DCUN1D4	protein_coding	CTD-2083E4.7	noncoding	0.998098	3.334e-12	Positive
DENND2D	protein_coding	EFCAB1	noncoding	0.998098	3.33111e-12	Positive
GLT25D2	protein_coding	LINC00113	noncoding	0.998099	3.32712e-12	Positive
PACRG	protein_coding	SLC7A7	noncoding	0.998099	3.32134e-12	Positive
TPM1	protein_coding	CTD-2313N18.2	noncoding	0.9981	3.31246e-12	Positive
SMOC2	protein_coding	XLOC_004128	noncoding	0.998101	3.30935e-12	Positive
TMEM45A	protein_coding	RP11-408H20.1	noncoding	0.998101	3.3078e-12	Positive
SPOCK3	protein_coding	AC226119.4	noncoding	0.998101	3.30735e-12	Positive
MATN2	protein_coding	AC034220.3	noncoding	0.998102	3.3018e-12	Positive
CD164	protein_coding	RP13-726E6.2	noncoding	0.998103	3.29514e-12	Positive
KIF21A	protein_coding	RP11-532F12.5	noncoding	0.998104	3.28826e-12	Positive
ARHGAP40	protein_coding	AC124789.1	noncoding	0.998104	3.2867e-12	Positive
ALCAM	protein_coding	AC004383.4	noncoding	0.998104	3.28182e-12	Positive
APBB2	protein_coding	XLOC_007927	noncoding	0.998106	3.26872e-12	Positive
LRRC34	protein_coding	RP11-429A20.4	noncoding	0.998106	3.26827e-12	Positive
IBSP	protein_coding	AC002454.1	noncoding	0.998107	3.26361e-12	Positive
C9orf116	protein_coding	LOC100133445	noncoding	0.998108	3.2554e-12	Positive
ANK3	protein_coding	FAM86DP	noncoding	0.998109	3.24896e-12	Positive
CYB5A	protein_coding	RP11-473M20.11	noncoding	0.998114	3.2081e-12	Positive
LIX1	protein_coding	XLOC_011172	noncoding	0.998115	3.20033e-12	Positive
ENOX1	protein_coding	RP11-298J20.3	noncoding	0.998116	3.19211e-12	Positive
CCDC65	protein_coding	TNFSF10	noncoding	0.998117	3.18368e-12	Positive
SERPINE2	protein_coding	RP11-438D8.2	noncoding	0.998117	3.18146e-12	Positive
APBB2	protein_coding	FAM86DP	noncoding	0.998118	3.1799e-12	Positive
GPR64	protein_coding	XLOC_000595	noncoding	0.998118	3.17946e-12	Positive
APOBEC3H	protein_coding	AC006445.8	noncoding	0.998118	3.17812e-12	Positive
ADCY8	protein_coding	XLOC_006928	noncoding	0.998118	3.17635e-12	Positive
CDHR3	protein_coding	ANKRD30BP2	noncoding	0.998119	3.16724e-12	Positive
FXYD3	protein_coding	XLOC_012538	noncoding	0.998122	3.14793e-12	Positive
LRRC48	protein_coding	RP11-263K19.4	noncoding	0.998123	3.14149e-12	Positive
VMO1	protein_coding	RP11-404P21.5	noncoding	0.998124	3.13483e-12	Positive
TIAM1	protein_coding	RP11-147L13.2	noncoding	0.998124	3.13483e-12	Positive
PDK4	protein_coding	XLOC_012083	noncoding	0.998124	3.13083e-12	Positive
TMEM200A	protein_coding	RP11-317P15.5	noncoding	0.998124	3.13038e-12	Positive
LRRIQ1	protein_coding	RP11-131N11.4	noncoding	0.998124	3.1295e-12	Positive
NSUN5	protein_coding	XLOC_013222	noncoding	0.998125	3.12639e-12	Positive
WFDC10B	protein_coding	CD99P1	noncoding	0.998125	3.12195e-12	Positive
BEX2	protein_coding	CHIT1	noncoding	0.998127	3.10951e-12	Positive
GAL	protein_coding	RP11-736K20.5	noncoding	0.998128	3.10463e-12	Positive
S100P	protein_coding	PSORS1C3	noncoding	0.99813	3.08997e-12	Positive
CALU	protein_coding	LINC00478	noncoding	0.998132	3.07088e-12	Positive
NOG	protein_coding	XLOC_000595	noncoding	0.998133	3.062e-12	Positive
SLAMF7	protein_coding	XLOC_011944	noncoding	0.998135	3.05334e-12	Positive
NEK7	protein_coding	PMS2P3	noncoding	0.998135	3.05067e-12	Positive
PIH1D2	protein_coding	RP1-8B1.4	noncoding	0.998135	3.04956e-12	Positive
HSPD1	protein_coding	CTC-338M12.5	noncoding	0.998135	3.0469e-12	Positive
ZNF385D	protein_coding	CHIT1	noncoding	0.998137	3.03668e-12	Positive
EGF	protein_coding	AL078621.4	noncoding	0.998138	3.02847e-12	Positive
GNA12	protein_coding	TNFRSF10B	noncoding	0.998138	3.02536e-12	Positive
CYB5A	protein_coding	ABCC6P1	noncoding	0.998139	3.02403e-12	Positive
ATP6V1B2	protein_coding	CTC-338M12.5	noncoding	0.99814	3.01092e-12	Positive
KIAA1161	protein_coding	GPM6A	noncoding	0.998141	3.0087e-12	Positive
SMARCA1	protein_coding	XLOC_012083	noncoding	0.998141	3.00537e-12	Positive
DDIT4L	protein_coding	IPW	noncoding	0.998143	2.99405e-12	Positive
DYX1C1	protein_coding	EFCAB1	noncoding	0.998143	2.99027e-12	Positive
CH25H	protein_coding	Z83851.1	noncoding	0.998143	2.98894e-12	Positive
TRPS1	protein_coding	PDZK1P1	noncoding	0.998144	2.98739e-12	Positive
PTPRD	protein_coding	XLOC_007993	noncoding	0.998144	2.9825e-12	Positive
OLFML2A	protein_coding	XLOC_007004	noncoding	0.998144	2.9825e-12	Positive
AIM2	protein_coding	LL22NC03-80A10.6	noncoding	0.998146	2.97184e-12	Positive
ZNF608	protein_coding	XLOC_003202	noncoding	0.998146	2.97051e-12	Positive
MFGE8	protein_coding	RP11-367J11.3	noncoding	0.998146	2.96874e-12	Positive
PDK4	protein_coding	CTD-2313N18.2	noncoding	0.998146	2.96785e-12	Positive
EYA4	protein_coding	RP11-298J20.3	noncoding	0.998147	2.96319e-12	Positive
ITGA5	protein_coding	RP11-736K20.5	noncoding	0.99815	2.94076e-12	Positive
IBSP	protein_coding	RP11-736K20.5	noncoding	0.99815	2.93965e-12	Positive
IFI16	protein_coding	AL928742.12	noncoding	0.99815	2.93832e-12	Positive
REEP1	protein_coding	AC084149.2	noncoding	0.99815	2.93832e-12	Positive
SAMD4A	protein_coding	RP11-317P15.5	noncoding	0.998151	2.93543e-12	Positive
ZNF385D	protein_coding	RP11-65D13.1	noncoding	0.998151	2.93543e-12	Positive
NWD1	protein_coding	LOC100133445	noncoding	0.998151	2.93454e-12	Positive
CASP10	protein_coding	XLOC_011944	noncoding	0.998151	2.9341e-12	Positive
CCDC96	protein_coding	KIAA1324	noncoding	0.998151	2.93321e-12	Positive
KIAA1432	protein_coding	AX746535	noncoding	0.998152	2.92988e-12	Positive
LOC100288966	protein_coding	RP11-20I23.8	noncoding	0.998152	2.92855e-12	Positive
PLXNA2	protein_coding	RP11-400N13.1	noncoding	0.998152	2.92855e-12	Positive
ENAH	protein_coding	XLOC_007896	noncoding	0.998152	2.92788e-12	Positive
CCDC153	protein_coding	XLOC_007896	noncoding	0.998155	2.90878e-12	Positive
SNCA	protein_coding	AC013264.2	noncoding	0.998155	2.90323e-12	Positive
PYHIN1	protein_coding	IGL@	noncoding	0.998156	2.89857e-12	Positive
CHCHD1	protein_coding	ATP2B2-IT1	noncoding	0.998156	2.89635e-12	Positive
SPOCK3	protein_coding	RP11-778H2.1	noncoding	0.998157	2.88836e-12	Positive
FZD2	protein_coding	ANKRD36BP2	noncoding	0.998158	2.88702e-12	Positive
ASPH	protein_coding	RP1-60O19.2	noncoding	0.998159	2.88081e-12	Positive
ACAN	protein_coding	RP11-114H24.1	noncoding	0.998159	2.8777e-12	Positive
GAPT	protein_coding	KCNQ5-IT1	noncoding	0.99816	2.87326e-12	Positive
LYN	protein_coding	OIP5-AS1	noncoding	0.99816	2.87237e-12	Positive
PPP1R3B	protein_coding	AC004980.7	noncoding	0.998161	2.86127e-12	Positive
KDR	protein_coding	XLOC_001338	noncoding	0.998162	2.85905e-12	Positive
MYO1C	protein_coding	RP11-770J1.3	noncoding	0.998163	2.85083e-12	Positive
MALT1	protein_coding	RP1-60O19.2	noncoding	0.998163	2.84928e-12	Positive
OPRK1	protein_coding	AC003986.7	noncoding	0.998164	2.84262e-12	Positive
NRARP	protein_coding	RP11-800A3.4	noncoding	0.998166	2.83173e-12	Positive
XBP1	protein_coding	SNHG1	noncoding	0.998166	2.83018e-12	Positive
TMEM35	protein_coding	AL078621.4	noncoding	0.998167	2.82441e-12	Positive
APP	protein_coding	AC079776.2	noncoding	0.998168	2.8173e-12	Positive
STOX1	protein_coding	AC013264.2	noncoding	0.998168	2.81508e-12	Positive
LRRIQ1	protein_coding	LOC100133445	noncoding	0.998169	2.8082e-12	Positive
CASP10	protein_coding	RP11-1C1.7	noncoding	0.998169	2.80709e-12	Positive
RHOBTB3	protein_coding	RP11-367J11.3	noncoding	0.99817	2.80398e-12	Positive
ZNF385D	protein_coding	RP11-114H24.1	noncoding	0.998173	2.77822e-12	Positive
FAM162B	protein_coding	RP5-991O23.1	noncoding	0.998173	2.77756e-12	Positive
VLDLR	protein_coding	RP11-155G14.5	noncoding	0.998174	2.77334e-12	Positive
FBN3	protein_coding	XLOC_004067	noncoding	0.998175	2.76978e-12	Positive
GCLM	protein_coding	XLOC_008992	noncoding	0.998175	2.76357e-12	Positive
ADRB1	protein_coding	TNFSF10	noncoding	0.998176	2.76201e-12	Positive
MTUS2	protein_coding	RP11-90D4.2	noncoding	0.998177	2.75602e-12	Positive
SYNPO	protein_coding	AK022898	noncoding	0.998177	2.75469e-12	Positive
SLAMF7	protein_coding	RP11-298J20.3	noncoding	0.998178	2.74936e-12	Positive
CH25H	protein_coding	RP1-8B1.4	noncoding	0.998178	2.74913e-12	Positive
MGST1	protein_coding	XLOC_006321	noncoding	0.998178	2.74802e-12	Positive
SOX6	protein_coding	RP11-61L23.2	noncoding	0.998178	2.74714e-12	Positive
USH2A	protein_coding	LINC00607	noncoding	0.998178	2.7458e-12	Positive
ROCK2	protein_coding	U73167.7	noncoding	0.998178	2.74492e-12	Positive
PARD3B	protein_coding	BX648501	noncoding	0.998179	2.74136e-12	Positive
TBC1D8	protein_coding	CTD-2313N18.2	noncoding	0.998182	2.7196e-12	Positive
HTR4	protein_coding	RP11-810P8.1	noncoding	0.998183	2.71205e-12	Positive
TMEM56	protein_coding	PDZK1P1	noncoding	0.998184	2.70806e-12	Positive
RAPGEF2	protein_coding	AC005162.3	noncoding	0.998184	2.70317e-12	Positive
FAM83D	protein_coding	ANKRD30BP2	noncoding	0.998185	2.70139e-12	Positive
C8orf48	protein_coding	RP11-65D13.1	noncoding	0.998185	2.69962e-12	Positive
ADAMTSL1	protein_coding	RP11-1336O20.2	noncoding	0.998185	2.69851e-12	Positive
LPCAT1	protein_coding	CHIT1	noncoding	0.998185	2.69607e-12	Positive
RARRES2	protein_coding	PMS2P3	noncoding	0.998187	2.68852e-12	Positive
IFITM5	protein_coding	XLOC_005079	noncoding	0.998187	2.68852e-12	Positive
CFP	protein_coding	RP11-263K19.4	noncoding	0.998187	2.68585e-12	Positive
NQO1	protein_coding	RP1-8B1.4	noncoding	0.998188	2.68097e-12	Positive
DMP1	protein_coding	RP11-331K21.1	noncoding	0.998189	2.67342e-12	Positive
STBD1	protein_coding	RP11-354M20.3	noncoding	0.998189	2.67342e-12	Positive
STEAP1B	protein_coding	IGL@	noncoding	0.99819	2.66454e-12	Positive
SLC4A2	protein_coding	XLOC_006088	noncoding	0.998191	2.6581e-12	Positive
CD109	protein_coding	RP11-172F10.1	noncoding	0.998192	2.65299e-12	Positive
SERPINE2	protein_coding	CTD-2501M5.1	noncoding	0.998192	2.65099e-12	Positive
NTRK2	protein_coding	CTC-228N24.1	noncoding	0.998193	2.64477e-12	Positive
GRB10	protein_coding	RP11-309M23.1	noncoding	0.998194	2.63656e-12	Positive
ADAMTSL1	protein_coding	GS1-526D21.5	noncoding	0.998195	2.63523e-12	Positive
DPEP1	protein_coding	RUSC2	noncoding	0.998196	2.62945e-12	Positive
BBS10	protein_coding	RP13-467H17.1	noncoding	0.998196	2.62856e-12	Positive
PDK4	protein_coding	AK021933	noncoding	0.998196	2.62745e-12	Positive
VMO1	protein_coding	XLOC_011944	noncoding	0.998197	2.61857e-12	Positive
DYX1C1	protein_coding	RP11-1C1.7	noncoding	0.998197	2.61657e-12	Positive
GPR64	protein_coding	RP11-618G20.2	noncoding	0.998198	2.61435e-12	Positive
FAM210A	protein_coding	RP11-163E9.2	noncoding	0.998198	2.61191e-12	Positive
SH3TC2	protein_coding	RP11-143E21.7	noncoding	0.998199	2.60814e-12	Positive
CPNE6	protein_coding	XLOC_013664	noncoding	0.998201	2.59304e-12	Positive
NAT9	protein_coding	XLOC_005968	noncoding	0.998203	2.58171e-12	Positive
FAT1	protein_coding	XLOC_003202	noncoding	0.998203	2.57949e-12	Positive
GPC1	protein_coding	XLOC_001415	noncoding	0.998205	2.57017e-12	Positive
SCIN	protein_coding	RP11-404P21.5	noncoding	0.998206	2.56284e-12	Positive
DYNLRB2	protein_coding	XLOC_007896	noncoding	0.998206	2.55973e-12	Positive
TNIK	protein_coding	RP1-167A14.2	noncoding	0.998207	2.5544e-12	Positive
GDA	protein_coding	LOC285768	noncoding	0.998209	2.54374e-12	Positive
SORCS1	protein_coding	XLOC_007004	noncoding	0.998209	2.54374e-12	Positive
SMOC2	protein_coding	AK123617	noncoding	0.998211	2.52975e-12	Positive
XBP1	protein_coding	RP11-693N9.2	noncoding	0.998211	2.52909e-12	Positive
LGALSL	protein_coding	RP11-75C9.1	noncoding	0.998212	2.5242e-12	Positive
TPD52L2	protein_coding	FAM86DP	noncoding	0.998213	2.51665e-12	Positive
PPEF1	protein_coding	PHKA2-AS1	noncoding	0.998213	2.51532e-12	Positive
GPIHBP1	protein_coding	RP11-247L20.4	noncoding	0.998214	2.50977e-12	Positive
PRELP	protein_coding	XLOC_001415	noncoding	0.998215	2.50111e-12	Positive
ITGA3	protein_coding	LOC441204	noncoding	0.998216	2.49933e-12	Positive
BAZ1A	protein_coding	IGL@	noncoding	0.998216	2.49623e-12	Positive
NT5DC3	protein_coding	CTD-2313N18.2	noncoding	0.998216	2.49623e-12	Positive
KCNIP4	protein_coding	MGC16121	noncoding	0.998218	2.48823e-12	Positive
RSPH1	protein_coding	EFCAB1	noncoding	0.998218	2.48579e-12	Positive
SPP1	protein_coding	RP11-469A15.2	noncoding	0.998219	2.47935e-12	Positive
FAM134B	protein_coding	CTB-37A13.1	noncoding	0.998219	2.47868e-12	Positive
TEKT1	protein_coding	EFCAB1	noncoding	0.998219	2.47669e-12	Positive
CXCL17	protein_coding	GPX2	noncoding	0.99822	2.47224e-12	Positive
UGT1A8	protein_coding	RP4-555L14.5	noncoding	0.99822	2.47136e-12	Positive
ADH1B	protein_coding	XLOC_007896	noncoding	0.998221	2.46825e-12	Positive
CCDC144NL	protein_coding	LOC349160	noncoding	0.998221	2.46669e-12	Positive
FMO5	protein_coding	FLJ00326	noncoding	0.998222	2.4627e-12	Positive
RAVER2	protein_coding	XLOC_003202	noncoding	0.998222	2.4627e-12	Positive
WASL	protein_coding	FLJ00326	noncoding	0.998223	2.4567e-12	Positive
CCDC89	protein_coding	RP11-345F18.1	noncoding	0.998224	2.44893e-12	Positive
KIAA1324	protein_coding	XLOC_000294	noncoding	0.998224	2.4456e-12	Positive
GRIK1	protein_coding	EFCAB2	noncoding	0.998227	2.43139e-12	Positive
IL1R2	protein_coding	AL928768.3	noncoding	0.998228	2.42539e-12	Positive
INPP5A	protein_coding	RP11-172F10.1	noncoding	0.998228	2.42517e-12	Positive
ZSCAN16	protein_coding	AE000662.93	noncoding	0.998228	2.42251e-12	Positive
PCDHGC3	protein_coding	RP1-60O19.2	noncoding	0.998229	2.41762e-12	Positive
SLC27A2	protein_coding	XLOC_014057	noncoding	0.998229	2.41474e-12	Positive
PURB	protein_coding	CTD-2026K11.1	noncoding	0.99823	2.40963e-12	Positive
CXCL17	protein_coding	RP11-1C1.7	noncoding	0.99823	2.40918e-12	Positive
CRK	protein_coding	WDFY3-AS2	noncoding	0.998231	2.40785e-12	Positive
ZBTB49	protein_coding	NOP14-AS1	noncoding	0.998231	2.40652e-12	Positive
POSTN	protein_coding	AC013264.2	noncoding	0.998231	2.4043e-12	Positive
MIPEP	protein_coding	FLJ26850	noncoding	0.998231	2.40274e-12	Positive
MNT	protein_coding	RP11-469A15.2	noncoding	0.998232	2.40052e-12	Positive
VLDLR	protein_coding	RP11-90D4.2	noncoding	0.998233	2.39142e-12	Positive
KCNK2	protein_coding	LINC00525	noncoding	0.998234	2.38853e-12	Positive
PPFIBP1	protein_coding	AC005013.5	noncoding	0.998234	2.38387e-12	Positive
GNA12	protein_coding	RP11-114H24.1	noncoding	0.998234	2.38387e-12	Positive
TGFB3	protein_coding	AC005162.3	noncoding	0.998235	2.37876e-12	Positive
GRB10	protein_coding	AC005013.5	noncoding	0.998235	2.37765e-12	Positive
FBN3	protein_coding	AC007682.1	noncoding	0.998236	2.37677e-12	Positive
RAD23A	protein_coding	RP11-367J11.3	noncoding	0.998237	2.36722e-12	Positive
VLDLR	protein_coding	AK021933	noncoding	0.99824	2.34968e-12	Positive
TMEM200A	protein_coding	MGC16121	noncoding	0.99824	2.3479e-12	Positive
SEMA3B	protein_coding	MIAT	noncoding	0.998241	2.34657e-12	Positive
TUSC1	protein_coding	LOC654433	noncoding	0.998241	2.34146e-12	Positive
FILIP1L	protein_coding	EFCAB2	noncoding	0.998242	2.34079e-12	Positive
PIH1D2	protein_coding	GHRLOS	noncoding	0.998242	2.33635e-12	Positive
GLIPR1	protein_coding	MGC16121	noncoding	0.998242	2.33547e-12	Positive
PPEF1	protein_coding	XLOC_006088	noncoding	0.998243	2.33324e-12	Positive
CFB	protein_coding	PSORS1C3	noncoding	0.998243	2.32969e-12	Positive
ZNF608	protein_coding	AC002454.1	noncoding	0.998246	2.3137e-12	Positive
VLDLR	protein_coding	AC226119.4	noncoding	0.998248	2.30238e-12	Positive
IGFBP2	protein_coding	BC028670	noncoding	0.998249	2.29927e-12	Positive
PDK4	protein_coding	U73167.7	noncoding	0.998249	2.29861e-12	Positive
LIPE	protein_coding	XLOC_007896	noncoding	0.998249	2.29683e-12	Positive
LRRC10B	protein_coding	XLOC_011944	noncoding	0.99825	2.29283e-12	Positive
PRL	protein_coding	RP11-438D8.2	noncoding	0.998251	2.28595e-12	Positive
OPRK1	protein_coding	RP11-308B16.2	noncoding	0.998251	2.28595e-12	Positive
REEP1	protein_coding	AC084117.3	noncoding	0.998254	2.26574e-12	Positive
RAB3IP	protein_coding	RP11-103G8.2	noncoding	0.998255	2.25953e-12	Positive
CCDC170	protein_coding	RP11-872J21.3	noncoding	0.998256	2.25819e-12	Positive
VMO1	protein_coding	EFCAB1	noncoding	0.998256	2.25664e-12	Positive
MNT	protein_coding	RP11-838N2.4	noncoding	0.998257	2.24931e-12	Positive
NEDD9	protein_coding	RP11-849N15.2	noncoding	0.998257	2.24798e-12	Positive
PKIB	protein_coding	RP11-404P21.5	noncoding	0.998261	2.22622e-12	Positive
IL33	protein_coding	XLOC_008992	noncoding	0.998261	2.22578e-12	Positive
PRL	protein_coding	XLOC_006928	noncoding	0.998262	2.22355e-12	Positive
APOBEC3H	protein_coding	RP11-408H20.1	noncoding	0.998262	2.21978e-12	Positive
OR5H6	protein_coding	RP11-438D8.2	noncoding	0.998263	2.21423e-12	Positive
GPR107	protein_coding	XLOC_003264	noncoding	0.998267	2.1938e-12	Positive
CDK14	protein_coding	CTC-367J11.1	noncoding	0.998267	2.19291e-12	Positive
ABI3BP	protein_coding	BC033241	noncoding	0.998267	2.19291e-12	Positive
CD44	protein_coding	RP11-404P21.5	noncoding	0.998268	2.18447e-12	Positive
PCDHB10	protein_coding	AC003664.1	noncoding	0.998269	2.1827e-12	Positive
MAPK12	protein_coding	AL078621.4	noncoding	0.998273	2.16116e-12	Positive
CHRDL2	protein_coding	CTD-2263F21.1	noncoding	0.998273	2.15827e-12	Positive
ERC1	protein_coding	RP11-838N2.4	noncoding	0.998274	2.15428e-12	Positive
PTGER3	protein_coding	XLOC_012538	noncoding	0.998274	2.15383e-12	Positive
C1orf110	protein_coding	ANKRD30BP2	noncoding	0.998274	2.15139e-12	Positive
LIPH	protein_coding	RP11-429G19.2	noncoding	0.998274	2.15028e-12	Positive
AMY1B	protein_coding	GHRLOS	noncoding	0.998276	2.14406e-12	Positive
TCEAL5	protein_coding	RUSC2	noncoding	0.998276	2.14317e-12	Positive
KCNIP4	protein_coding	RP11-654A16.3	noncoding	0.998276	2.14229e-12	Positive
NT5DC3	protein_coding	AC226119.4	noncoding	0.998278	2.13118e-12	Positive
CLMP	protein_coding	CTD-2269F5.1	noncoding	0.99828	2.12097e-12	Positive
VMO1	protein_coding	RP1-8B1.4	noncoding	0.99828	2.11875e-12	Positive
WISP2	protein_coding	AC004383.4	noncoding	0.998281	2.11164e-12	Positive
LOC100131094	protein_coding	RP11-443A13.2	noncoding	0.998283	2.10409e-12	Positive
APP	protein_coding	LDHA	noncoding	0.998284	2.1001e-12	Positive
ARRDC2	protein_coding	CHIT1	noncoding	0.998284	2.09566e-12	Positive
MBP	protein_coding	RP1-167A14.2	noncoding	0.998285	2.09055e-12	Positive
FXYD3	protein_coding	RP1-8B1.4	noncoding	0.998287	2.08189e-12	Positive
ECE1	protein_coding	RP11-493L12.2	noncoding	0.998288	2.07434e-12	Positive
OR5H6	protein_coding	XLOC_006928	noncoding	0.998288	2.0739e-12	Positive
TBC1D8	protein_coding	XLOC_003202	noncoding	0.998289	2.07168e-12	Positive
DYNLRB2	protein_coding	PSORS1C3	noncoding	0.998289	2.0699e-12	Positive
LYST	protein_coding	XLOC_011178	noncoding	0.99829	2.06635e-12	Positive
MEPE	protein_coding	RP11-400N13.1	noncoding	0.998291	2.06102e-12	Positive
YAP1	protein_coding	RP11-163E9.2	noncoding	0.998291	2.05969e-12	Positive
SPOCK3	protein_coding	BC033241	noncoding	0.998292	2.05391e-12	Positive
LOC389831	protein_coding	XLOC_003202	noncoding	0.998293	2.0508e-12	Positive
SREBF1	protein_coding	BX571672.2	noncoding	0.998293	2.05036e-12	Positive
FAM126A	protein_coding	AK123617	noncoding	0.998295	2.03748e-12	Positive
ZNF711	protein_coding	IPW	noncoding	0.998296	2.03126e-12	Positive
GIPC2	protein_coding	LL22NC03-86G7.1	noncoding	0.998297	2.02904e-12	Positive
CAPS	protein_coding	EFCAB1	noncoding	0.998297	2.02682e-12	Positive
SNTN	protein_coding	XLOC_007896	noncoding	0.998297	2.02505e-12	Positive
ERC1	protein_coding	AC004980.7	noncoding	0.998301	2.00773e-12	Positive
APOBEC3H	protein_coding	RP11-20I23.8	noncoding	0.998301	2.00773e-12	Positive
CSNK1A1	protein_coding	RP11-654A16.3	noncoding	0.998302	2.00018e-12	Positive
MATN3	protein_coding	XLOC_003416	noncoding	0.998303	1.99618e-12	Positive
CD320	protein_coding	RP1-60O19.2	noncoding	0.998303	1.99307e-12	Positive
LRRC10B	protein_coding	EFCAB1	noncoding	0.998304	1.9873e-12	Positive
C12orf23	protein_coding	RP11-817O13.8	noncoding	0.998305	1.98175e-12	Positive
APBB2	protein_coding	MT1JP	noncoding	0.998307	1.97486e-12	Positive
RARRES1	protein_coding	LOC100133445	noncoding	0.99831	1.95621e-12	Positive
PTPRD	protein_coding	RP11-20I23.8	noncoding	0.99831	1.95621e-12	Positive
APBB2	protein_coding	RP11-406O23.2	noncoding	0.998312	1.94689e-12	Positive
ADARB1	protein_coding	RP11-163E9.2	noncoding	0.998312	1.94644e-12	Positive
CRIM1	protein_coding	AC004383.4	noncoding	0.998313	1.94467e-12	Positive
SPATA18	protein_coding	RP11-841O20.2	noncoding	0.998313	1.942e-12	Positive
TCEAL5	protein_coding	XLOC_007004	noncoding	0.998314	1.93934e-12	Positive
C2orf88	protein_coding	GHRLOS	noncoding	0.998314	1.93734e-12	Positive
FANK1	protein_coding	XLOC_012538	noncoding	0.998315	1.93356e-12	Positive
FANK1	protein_coding	RP11-263K19.4	noncoding	0.998316	1.92912e-12	Positive
FMO5	protein_coding	AX747547	noncoding	0.998316	1.92779e-12	Positive
IGFBP2	protein_coding	AC005013.5	noncoding	0.998317	1.92335e-12	Positive
SPOCK3	protein_coding	RP11-849N15.2	noncoding	0.998317	1.92202e-12	Positive
DGKG	protein_coding	RP11-455B3.1	noncoding	0.998317	1.92135e-12	Positive
NTRK2	protein_coding	XLOC_006928	noncoding	0.998318	1.91891e-12	Positive
SPOCK3	protein_coding	RP11-38H17.1	noncoding	0.998319	1.91336e-12	Positive
ITK	protein_coding	BC033241	noncoding	0.99832	1.90759e-12	Positive
SCIN	protein_coding	RNF157-AS1	noncoding	0.99832	1.90603e-12	Positive
GUCY1A3	protein_coding	XLOC_007896	noncoding	0.998322	1.89626e-12	Positive
FLT1	protein_coding	FLJ00326	noncoding	0.998322	1.89515e-12	Positive
CLDN19	protein_coding	LINC00113	noncoding	0.998323	1.89337e-12	Positive
SCIN	protein_coding	RP1-8B1.4	noncoding	0.998323	1.89093e-12	Positive
VMO1	protein_coding	TNFSF10	noncoding	0.998323	1.89027e-12	Positive
CYB5R2	protein_coding	RP11-426C22.5	noncoding	0.998324	1.88849e-12	Positive
FAM210A	protein_coding	AC019068.2	noncoding	0.998324	1.8876e-12	Positive
SCRG1	protein_coding	AK123617	noncoding	0.998324	1.88738e-12	Positive
ENPP1	protein_coding	XLOC_001338	noncoding	0.998324	1.88516e-12	Positive
EHF	protein_coding	RP4-575N6.4	noncoding	0.998325	1.88005e-12	Positive
SLC8A3	protein_coding	AC084117.3	noncoding	0.998326	1.87805e-12	Positive
MTUS2	protein_coding	RP11-1336O20.2	noncoding	0.998326	1.87739e-12	Positive
TEKT3	protein_coding	RP11-404P21.5	noncoding	0.998327	1.87161e-12	Positive
MAFK	protein_coding	RP11-461F11.3	noncoding	0.998327	1.87161e-12	Positive
MALT1	protein_coding	AC034220.3	noncoding	0.998329	1.86207e-12	Positive
PPP1R1C	protein_coding	RP11-143E21.7	noncoding	0.99833	1.85585e-12	Positive
SHISA6	protein_coding	AC004383.4	noncoding	0.99833	1.8554e-12	Positive
SFTPC	protein_coding	RP11-1C1.7	noncoding	0.998331	1.84963e-12	Positive
VLDLR	protein_coding	FAM86HP	noncoding	0.998331	1.84874e-12	Positive
PCDH7	protein_coding	RP1-8B1.4	noncoding	0.998332	1.8443e-12	Positive
RAVER2	protein_coding	AC002454.1	noncoding	0.998335	1.83364e-12	Positive
CEACAM3	protein_coding	FLJ26850	noncoding	0.998335	1.83009e-12	Positive
LEPR	protein_coding	LINC00607	noncoding	0.998336	1.82832e-12	Positive
IL13RA2	protein_coding	CEACAMP3	noncoding	0.998337	1.82343e-12	Positive
COL11A2	protein_coding	WDFY3-AS2	noncoding	0.998337	1.82343e-12	Positive
AP3B2	protein_coding	AC005013.5	noncoding	0.99834	1.80611e-12	Positive
ZNF385A	protein_coding	RP11-61L23.2	noncoding	0.99834	1.80611e-12	Positive
KRT23	protein_coding	XLOC_007896	noncoding	0.998341	1.80256e-12	Positive
SESN3	protein_coding	AC005162.3	noncoding	0.998341	1.801e-12	Positive
CA3	protein_coding	IPW	noncoding	0.998342	1.79767e-12	Positive
FGFBP2	protein_coding	STAG3L1	noncoding	0.998342	1.79634e-12	Positive
CASP4	protein_coding	RP11-693N9.2	noncoding	0.998342	1.79523e-12	Positive
DYX1C1	protein_coding	LOC100133445	noncoding	0.998343	1.79146e-12	Positive
IL8	protein_coding	GS1-393G12.12	noncoding	0.998343	1.79101e-12	Positive
IQCG	protein_coding	XLOC_011944	noncoding	0.998344	1.78524e-12	Positive
GALNT3	protein_coding	AL035610.1	noncoding	0.998345	1.78035e-12	Positive
CPA3	protein_coding	XLOC_011944	noncoding	0.998346	1.77725e-12	Positive
IQCD	protein_coding	EFCAB1	noncoding	0.998347	1.77147e-12	Positive
CASP10	protein_coding	RNF157-AS1	noncoding	0.998347	1.77103e-12	Positive
APBB2	protein_coding	AC002456.2	noncoding	0.998348	1.76614e-12	Positive
PLEKHH2	protein_coding	BC028670	noncoding	0.998351	1.7546e-12	Positive
STMN2	protein_coding	CSPG4P5	noncoding	0.998351	1.75282e-12	Positive
FHAD1	protein_coding	RP11-298J20.3	noncoding	0.998352	1.7506e-12	Positive
DMP1	protein_coding	CTD-2313N18.2	noncoding	0.998352	1.74949e-12	Positive
MYB	protein_coding	RP11-69I8.3	noncoding	0.998352	1.74794e-12	Positive
TSPAN1	protein_coding	RP11-131N11.4	noncoding	0.998352	1.7466e-12	Positive
ELAVL2	protein_coding	CTD-2313N18.2	noncoding	0.998353	1.74394e-12	Positive
SCAF1	protein_coding	RP11-163E9.2	noncoding	0.998353	1.74305e-12	Positive
ZBTB20	protein_coding	CTC-338M12.5	noncoding	0.998353	1.74305e-12	Positive
TTN	protein_coding	LINC00113	noncoding	0.998353	1.74261e-12	Positive
SPOCK3	protein_coding	RP11-90D4.2	noncoding	0.998356	1.72751e-12	Positive
GLIPR2	protein_coding	AC003075.4	noncoding	0.998358	1.71929e-12	Positive
SPOCK3	protein_coding	U73167.7	noncoding	0.99836	1.71174e-12	Positive
CCL26	protein_coding	U47924.27	noncoding	0.998361	1.7053e-12	Positive
SPOCK3	protein_coding	AK021933	noncoding	0.998362	1.70108e-12	Positive
MGST1	protein_coding	WDFY3-AS2	noncoding	0.998363	1.6982e-12	Positive
SPTLC3	protein_coding	CTB-161A2.3	noncoding	0.998363	1.6982e-12	Positive
ABI3BP	protein_coding	XLOC_012083	noncoding	0.998363	1.69642e-12	Positive
MATN3	protein_coding	AK123617	noncoding	0.998365	1.68865e-12	Positive
SHISA6	protein_coding	RP11-849I19.1	noncoding	0.998365	1.68776e-12	Positive
WDR66	protein_coding	XLOC_012538	noncoding	0.998365	1.68665e-12	Positive
C1orf114	protein_coding	XLOC_008992	noncoding	0.998366	1.68421e-12	Positive
ITGA3	protein_coding	WDFY3-AS2	noncoding	0.998366	1.68132e-12	Positive
ALCAM	protein_coding	NSUN5P1	noncoding	0.99837	1.66622e-12	Positive
CD320	protein_coding	AK023304	noncoding	0.998372	1.65623e-12	Positive
KLHDC7B	protein_coding	AE000662.93	noncoding	0.998374	1.64624e-12	Positive
MFGE8	protein_coding	AK123617	noncoding	0.998375	1.64224e-12	Positive
MYB	protein_coding	XLOC_007896	noncoding	0.998375	1.64135e-12	Positive
CHRDL2	protein_coding	RP11-408H20.1	noncoding	0.998378	1.62714e-12	Positive
SHISA6	protein_coding	AC006445.8	noncoding	0.998379	1.62492e-12	Positive
LRRC48	protein_coding	RP11-38P22.2	noncoding	0.998379	1.62448e-12	Positive
RAPH1	protein_coding	RP13-726E6.2	noncoding	0.99838	1.61693e-12	Positive
RIBC2	protein_coding	RP11-263K19.4	noncoding	0.998381	1.61338e-12	Positive
LRRC10B	protein_coding	RNF157-AS1	noncoding	0.998382	1.60849e-12	Positive
LIX1	protein_coding	XLOC_013275	noncoding	0.998383	1.60671e-12	Positive
WDR66	protein_coding	RP11-263K19.4	noncoding	0.998383	1.60405e-12	Positive
DYX1C1	protein_coding	GPX2	noncoding	0.998384	1.60094e-12	Positive
FAM83D	protein_coding	RP1-8B1.4	noncoding	0.998384	1.60094e-12	Positive
GPR133	protein_coding	RP11-354M20.3	noncoding	0.998384	1.59894e-12	Positive
MATN2	protein_coding	RP11-283I3.2	noncoding	0.998385	1.59872e-12	Positive
PCDH7	protein_coding	EFCAB2	noncoding	0.998385	1.59783e-12	Positive
ATP9A	protein_coding	AC004383.4	noncoding	0.998385	1.5965e-12	Positive
DNAJC30	protein_coding	LDHA	noncoding	0.998386	1.59228e-12	Positive
DPYSL2	protein_coding	XLOC_006088	noncoding	0.998386	1.59162e-12	Positive
RIBC2	protein_coding	RP11-131N11.4	noncoding	0.998386	1.59117e-12	Positive
HSPB8	protein_coding	XLOC_011178	noncoding	0.998389	1.57852e-12	Positive
GABRA2	protein_coding	RP11-838N2.4	noncoding	0.998389	1.5774e-12	Positive
POSTN	protein_coding	FLJ26850	noncoding	0.99839	1.57474e-12	Positive
CD164	protein_coding	FAM86DP	noncoding	0.99839	1.5743e-12	Positive
DSEL	protein_coding	RP11-243M5.1	noncoding	0.998392	1.56453e-12	Positive
GPC1	protein_coding	NOP14-AS1	noncoding	0.998394	1.55898e-12	Positive
SNTG1	protein_coding	AK000840	noncoding	0.998396	1.55032e-12	Positive
CRIM1	protein_coding	RP11-317P15.5	noncoding	0.998398	1.5401e-12	Positive
NDN	protein_coding	RP11-61L23.2	noncoding	0.9984	1.52944e-12	Positive
COL1A1	protein_coding	LINC00525	noncoding	0.998401	1.52722e-12	Positive
MFGE8	protein_coding	XLOC_006088	noncoding	0.998402	1.52323e-12	Positive
KCNIP4	protein_coding	RP11-308B16.2	noncoding	0.998402	1.52056e-12	Positive
PRL	protein_coding	CTD-2501M5.1	noncoding	0.998403	1.51679e-12	Positive
ACTA2	protein_coding	RP11-77A13.1	noncoding	0.998404	1.5119e-12	Positive
CHRM2	protein_coding	IPW	noncoding	0.998405	1.5099e-12	Positive
MSANTD3	protein_coding	LINC00113	noncoding	0.998407	1.50235e-12	Positive
FBN3	protein_coding	RP11-400N13.1	noncoding	0.998407	1.50147e-12	Positive
MPZL2	protein_coding	BC028842	noncoding	0.998407	1.50013e-12	Positive
TMEM200C	protein_coding	LOC646719	noncoding	0.998407	1.49969e-12	Positive
TNIK	protein_coding	XLOC_014080	noncoding	0.998408	1.49747e-12	Positive
SMOC2	protein_coding	RP1-60O19.2	noncoding	0.998409	1.49392e-12	Positive
POSTN	protein_coding	LOC100133445	noncoding	0.998409	1.49192e-12	Positive
SLC8A3	protein_coding	RP11-90D4.2	noncoding	0.99841	1.4897e-12	Positive
SESN3	protein_coding	AC006445.8	noncoding	0.998412	1.48104e-12	Positive
LEPREL1	protein_coding	XLOC_006088	noncoding	0.998412	1.47926e-12	Positive
ACAN	protein_coding	RP11-408H20.1	noncoding	0.998414	1.47127e-12	Positive
C11orf96	protein_coding	LINC00592	noncoding	0.998416	1.46461e-12	Positive
KRT23	protein_coding	U47924.27	noncoding	0.998416	1.46194e-12	Positive
VMO1	protein_coding	RP11-298J20.3	noncoding	0.998417	1.4595e-12	Positive
CDR2	protein_coding	KRT18P55	noncoding	0.998418	1.45506e-12	Positive
FHAD1	protein_coding	XLOC_007896	noncoding	0.998418	1.45395e-12	Positive
GJA1	protein_coding	XLOC_001980	noncoding	0.998418	1.4535e-12	Positive
KCNMB4	protein_coding	WDFY3-AS2	noncoding	0.998418	1.45306e-12	Positive
SOX2	protein_coding	U47924.27	noncoding	0.998419	1.45262e-12	Positive
KCNIP4	protein_coding	AC006445.8	noncoding	0.99842	1.44462e-12	Positive
TEX14	protein_coding	RP11-438D8.2	noncoding	0.998421	1.44418e-12	Positive
ODF2L	protein_coding	XLOC_000294	noncoding	0.998421	1.44196e-12	Positive
YIPF2	protein_coding	TUG1	noncoding	0.998423	1.43641e-12	Positive
NEDD9	protein_coding	RP13-726E6.2	noncoding	0.998423	1.43574e-12	Positive
FMO5	protein_coding	CTD-2313N18.2	noncoding	0.998423	1.43263e-12	Positive
NWD1	protein_coding	AC013264.2	noncoding	0.998424	1.43041e-12	Positive
BCL2L1	protein_coding	TMEM191A	noncoding	0.998425	1.4273e-12	Positive
TMEM200C	protein_coding	AK123617	noncoding	0.998425	1.42464e-12	Positive
PRL	protein_coding	XLOC_004244	noncoding	0.998426	1.42331e-12	Positive
DNAJB6	protein_coding	CTD-2152M20.2	noncoding	0.998428	1.41398e-12	Positive
APOBEC3H	protein_coding	AK123617	noncoding	0.99843	1.40421e-12	Positive
SCUBE1	protein_coding	AC034220.3	noncoding	0.998431	1.40354e-12	Positive
C9orf116	protein_coding	XLOC_012538	noncoding	0.998431	1.40044e-12	Positive
PITPNM3	protein_coding	XLOC_012083	noncoding	0.998434	1.39022e-12	Positive
TMEM25	protein_coding	AK022898	noncoding	0.998435	1.386e-12	Positive
FN1	protein_coding	U73167.7	noncoding	0.998437	1.3789e-12	Positive
NYAP1	protein_coding	RP11-72I8.1	noncoding	0.998438	1.37312e-12	Positive
CD164	protein_coding	LOC646719	noncoding	0.998441	1.36291e-12	Positive
TNFSF13B	protein_coding	ANKRD36BP2	noncoding	0.998441	1.3618e-12	Positive
MYZAP	protein_coding	RP1-60O19.2	noncoding	0.998442	1.35847e-12	Positive
SCIN	protein_coding	RP11-298J20.3	noncoding	0.998442	1.35802e-12	Positive
TNNT2	protein_coding	RP11-75C9.1	noncoding	0.998444	1.35159e-12	Positive
CPA3	protein_coding	RP1-8B1.4	noncoding	0.998444	1.34959e-12	Positive
LSAMP	protein_coding	XLOC_014057	noncoding	0.998445	1.34714e-12	Positive
ENPP2	protein_coding	RP11-838N2.4	noncoding	0.998445	1.34648e-12	Positive
SMOC2	protein_coding	AC004383.4	noncoding	0.998445	1.34559e-12	Positive
LRRC48	protein_coding	GHRLOS	noncoding	0.998446	1.34137e-12	Positive
STEAP1	protein_coding	EFCAB1	noncoding	0.998446	1.34115e-12	Positive
TMEM200A	protein_coding	XLOC_011178	noncoding	0.998448	1.33626e-12	Positive
RSPH9	protein_coding	RP11-247L20.4	noncoding	0.998448	1.3356e-12	Positive
IBSP	protein_coding	XLOC_011178	noncoding	0.998448	1.33515e-12	Positive
FLT1	protein_coding	XLOC_012083	noncoding	0.998448	1.3336e-12	Positive
ADCY8	protein_coding	LOC285768	noncoding	0.998452	1.31894e-12	Positive
LYST	protein_coding	XLOC_006301	noncoding	0.998453	1.31473e-12	Positive
ADAMTSL1	protein_coding	RP11-90D4.2	noncoding	0.998456	1.30407e-12	Positive
ANGPTL2	protein_coding	PDZK1P1	noncoding	0.998457	1.29941e-12	Positive
SCUBE1	protein_coding	AC004383.4	noncoding	0.998459	1.29474e-12	Positive
TEX14	protein_coding	RP11-400N13.1	noncoding	0.998459	1.29452e-12	Positive
DEFA3	protein_coding	XLOC_007896	noncoding	0.998459	1.29141e-12	Positive
LRRFIP1	protein_coding	AC104135.3	noncoding	0.998461	1.28608e-12	Positive
CCDC173	protein_coding	EFCAB1	noncoding	0.998462	1.28164e-12	Positive
PXDN	protein_coding	CTD-2152M20.2	noncoding	0.998463	1.27942e-12	Positive
DNAJC30	protein_coding	LINC00607	noncoding	0.998463	1.27764e-12	Positive
YSK4	protein_coding	XLOC_005563	noncoding	0.998463	1.2772e-12	Positive
SNTN	protein_coding	RP11-1C1.7	noncoding	0.998464	1.27542e-12	Positive
TNNC1	protein_coding	RP11-114H24.1	noncoding	0.998464	1.27542e-12	Positive
CCDC65	protein_coding	EFCAB1	noncoding	0.998464	1.27454e-12	Positive
AIF1	protein_coding	RP11-8L8.2	noncoding	0.998464	1.27409e-12	Positive
MAP3K8	protein_coding	PMSP	noncoding	0.998464	1.2732e-12	Positive
LRRIQ1	protein_coding	XLOC_012538	noncoding	0.998465	1.26921e-12	Positive
ZNF440	protein_coding	AC006050.3	noncoding	0.998468	1.25855e-12	Positive
GABRB2	protein_coding	RP11-454P21.1	noncoding	0.998468	1.25855e-12	Positive
SYCP2L	protein_coding	RP13-467H17.1	noncoding	0.998468	1.2581e-12	Positive
RSPH4A	protein_coding	RP11-150O12.6	noncoding	0.998469	1.25455e-12	Positive
ZNF711	protein_coding	RP11-354M20.3	noncoding	0.998471	1.24989e-12	Positive
LOC100288966	protein_coding	LL22NC03-86G7.1	noncoding	0.998472	1.24611e-12	Positive
JAKMIP1	protein_coding	CTA-363E6.2	noncoding	0.998472	1.24301e-12	Positive
GRB10	protein_coding	CTC-367J11.1	noncoding	0.998473	1.24212e-12	Positive
ATP10A	protein_coding	RP11-680C21.1	noncoding	0.998473	1.24012e-12	Positive
LOC100131094	protein_coding	RP11-247L20.4	noncoding	0.998473	1.23923e-12	Positive
FILIP1L	protein_coding	RP11-263K19.4	noncoding	0.998474	1.23701e-12	Positive
SESN3	protein_coding	XLOC_011172	noncoding	0.998474	1.2359e-12	Positive
PRRG1	protein_coding	KRT18P55	noncoding	0.998475	1.23279e-12	Positive
FKBP10	protein_coding	LOC646719	noncoding	0.998475	1.2319e-12	Positive
CCDC152	protein_coding	AC004383.4	noncoding	0.998477	1.22613e-12	Positive
SYNM	protein_coding	AK123617	noncoding	0.998477	1.22613e-12	Positive
TMEM200A	protein_coding	RP11-736K20.5	noncoding	0.998479	1.21902e-12	Positive
SORCS1	protein_coding	AC005013.5	noncoding	0.998479	1.21814e-12	Positive
IQCG	protein_coding	XLOC_007896	noncoding	0.99848	1.21592e-12	Positive
CH25H	protein_coding	AC013264.2	noncoding	0.99848	1.21414e-12	Positive
FHAD1	protein_coding	U47924.27	noncoding	0.998481	1.21192e-12	Positive
MSANTD3	protein_coding	AK123617	noncoding	0.998482	1.20748e-12	Positive
DMWD	protein_coding	BC073927	noncoding	0.998482	1.20703e-12	Positive
PITPNM3	protein_coding	BC033241	noncoding	0.998483	1.20415e-12	Positive
CST2	protein_coding	RP11-800A3.4	noncoding	0.998485	1.19926e-12	Positive
IGFBP1	protein_coding	XLOC_004128	noncoding	0.998485	1.19815e-12	Positive
CTGF	protein_coding	XLOC_011172	noncoding	0.998485	1.19771e-12	Positive
EGLN1	protein_coding	AL035610.1	noncoding	0.998485	1.19638e-12	Positive
IGFBP2	protein_coding	CSPG4P5	noncoding	0.998485	1.19638e-12	Positive
DYX1C1	protein_coding	RP11-298J20.3	noncoding	0.998486	1.19416e-12	Positive
GLRA3	protein_coding	RP11-254K3.1	noncoding	0.998486	1.19327e-12	Positive
FANK1	protein_coding	GHRLOS	noncoding	0.998487	1.19105e-12	Positive
KCNIP4	protein_coding	XLOC_000424	noncoding	0.998487	1.19105e-12	Positive
KIAA1432	protein_coding	AC004383.4	noncoding	0.998488	1.18705e-12	Positive
CAPS	protein_coding	RP11-404P21.5	noncoding	0.998491	1.17639e-12	Positive
MPZL2	protein_coding	FLJ26850	noncoding	0.998492	1.17328e-12	Positive
ST14	protein_coding	RP11-1L12.3	noncoding	0.998493	1.16884e-12	Positive
IFI16	protein_coding	AL928768.3	noncoding	0.998494	1.16662e-12	Positive
IQCG	protein_coding	EFCAB1	noncoding	0.998494	1.16485e-12	Positive
DSEL	protein_coding	RP11-838N2.4	noncoding	0.998495	1.16196e-12	Positive
GPNMB	protein_coding	CTD-2152M20.2	noncoding	0.998496	1.15996e-12	Positive
PLEKHH2	protein_coding	XLOC_006088	noncoding	0.998496	1.15952e-12	Positive
PTGER3	protein_coding	Z83851.1	noncoding	0.998496	1.15796e-12	Positive
CYB5R4	protein_coding	FAS	noncoding	0.998497	1.15374e-12	Positive
GPER	protein_coding	PHKA2-AS1	noncoding	0.998498	1.15308e-12	Positive
TRIM52	protein_coding	BNIP3P1	noncoding	0.998499	1.14952e-12	Positive
FAM83D	protein_coding	RP11-1C1.7	noncoding	0.998499	1.14886e-12	Positive
SERPINE2	protein_coding	RP11-810P8.1	noncoding	0.9985	1.14486e-12	Positive
FAT3	protein_coding	XLOC_001338	noncoding	0.9985	1.14397e-12	Positive
CAMK2N1	protein_coding	XLOC_012083	noncoding	0.998501	1.14353e-12	Positive
ITK	protein_coding	U73167.7	noncoding	0.998501	1.14264e-12	Positive
FAM134B	protein_coding	GS1-526D21.5	noncoding	0.998501	1.14087e-12	Positive
KCNJ15	protein_coding	RP11-263K19.4	noncoding	0.998502	1.13687e-12	Positive
CXCL17	protein_coding	AX748294	noncoding	0.998503	1.13376e-12	Positive
DDIT4L	protein_coding	KB-1615E4.2	noncoding	0.998505	1.12887e-12	Positive
CST2	protein_coding	XLOC_011944	noncoding	0.998505	1.1271e-12	Positive
APP	protein_coding	FLJ00326	noncoding	0.998506	1.12599e-12	Positive
MTUS2	protein_coding	RP13-726E6.2	noncoding	0.998506	1.12332e-12	Positive
CLDN4	protein_coding	MUC5AC	noncoding	0.998507	1.11955e-12	Positive
MTUS2	protein_coding	U73167.7	noncoding	0.998507	1.11955e-12	Positive
DYX1C1	protein_coding	XLOC_011944	noncoding	0.998508	1.11955e-12	Positive
AKT3	protein_coding	NOP14-AS1	noncoding	0.998508	1.11844e-12	Positive
IQCG	protein_coding	RP11-66B24.2	noncoding	0.99851	1.10978e-12	Positive
CAMK2N1	protein_coding	BC033241	noncoding	0.998514	1.09823e-12	Positive
FAM154B	protein_coding	XLOC_012538	noncoding	0.998514	1.09712e-12	Positive
IL8	protein_coding	XLOC_014244	noncoding	0.998515	1.09557e-12	Positive
GJA1	protein_coding	CSPG4P5	noncoding	0.998515	1.09335e-12	Positive
APP	protein_coding	LINC00607	noncoding	0.998518	1.08624e-12	Positive
FAT3	protein_coding	AC004383.4	noncoding	0.998518	1.08447e-12	Positive
GPR75	protein_coding	WDFY3-AS2	noncoding	0.998518	1.08402e-12	Positive
GLIPR2	protein_coding	RP11-693N9.2	noncoding	0.998519	1.08091e-12	Positive
GPR64	protein_coding	AC002456.2	noncoding	0.998521	1.07603e-12	Positive
TNIK	protein_coding	LL22NC03-86G7.1	noncoding	0.998521	1.07536e-12	Positive
SGK223	protein_coding	CTD-2263F21.1	noncoding	0.998522	1.07114e-12	Positive
SAMD5	protein_coding	RP11-90D4.2	noncoding	0.998523	1.06937e-12	Positive
PPAP2C	protein_coding	RP11-38P22.2	noncoding	0.998524	1.06359e-12	Positive
GRB10	protein_coding	XLOC_006088	noncoding	0.998524	1.06359e-12	Positive
MATN3	protein_coding	AC005013.5	noncoding	0.998525	1.06315e-12	Positive
EFCAB1	protein_coding	RP11-404P21.5	noncoding	0.998526	1.05915e-12	Positive
CAPS	protein_coding	RP11-298J20.3	noncoding	0.998526	1.05715e-12	Positive
KRT23	protein_coding	RP11-298J20.3	noncoding	0.998527	1.05671e-12	Positive
SORCS1	protein_coding	BC028670	noncoding	0.998527	1.05671e-12	Positive
MID1	protein_coding	CP	noncoding	0.998527	1.05582e-12	Positive
RSPH4A	protein_coding	RP11-800A3.4	noncoding	0.998529	1.05027e-12	Positive
KIF21A	protein_coding	RP1-8B1.4	noncoding	0.998531	1.04161e-12	Positive
NDUFA4L2	protein_coding	AX721193	noncoding	0.998532	1.03961e-12	Positive
TNS3	protein_coding	RP11-345F18.1	noncoding	0.998533	1.03562e-12	Positive
CAMK2N1	protein_coding	AC002454.1	noncoding	0.998534	1.03428e-12	Positive
AKT3	protein_coding	RP11-72I8.1	noncoding	0.998535	1.03118e-12	Positive
DLX5	protein_coding	RP11-254K3.1	noncoding	0.998535	1.03073e-12	Positive
SESN3	protein_coding	XLOC_011178	noncoding	0.998535	1.03051e-12	Positive
LRRC48	protein_coding	XLOC_012538	noncoding	0.998537	1.02451e-12	Positive
DNAH1	protein_coding	XLOC_007896	noncoding	0.998539	1.01785e-12	Positive
DYNLRB2	protein_coding	RP11-800A3.4	noncoding	0.998539	1.01696e-12	Positive
SMOC2	protein_coding	RP13-726E6.2	noncoding	0.998539	1.01585e-12	Positive
PLCL2	protein_coding	RP11-800A3.4	noncoding	0.99854	1.0143e-12	Positive
TBRG4	protein_coding	XLOC_004988	noncoding	0.998541	1.01164e-12	Positive
HTR4	protein_coding	RP5-842K16.1	noncoding	0.998542	1.00941e-12	Positive
ERC1	protein_coding	RP11-163E9.2	noncoding	0.998544	1.00098e-12	Positive
LAMA4	protein_coding	AK123617	noncoding	0.998545	1.00009e-12	Positive
APOBEC3H	protein_coding	RP1-60O19.2	noncoding	0.998545	9.98979e-13	Positive
CCDC65	protein_coding	XLOC_011944	noncoding	0.998545	9.97868e-13	Positive
ASPH	protein_coding	AK123617	noncoding	0.998546	9.9698e-13	Positive
POTED	protein_coding	MIR210HG	noncoding	0.998546	9.95204e-13	Positive
BATF	protein_coding	LL22NC03-80A10.6	noncoding	0.998547	9.91207e-13	Positive
TTC7B	protein_coding	LOC643401	noncoding	0.998548	9.90541e-13	Positive
RHOBTB3	protein_coding	XLOC_001338	noncoding	0.998552	9.78329e-13	Positive
PRL	protein_coding	RP11-308B16.2	noncoding	0.998552	9.75886e-13	Positive
NACC2	protein_coding	AC019068.2	noncoding	0.998553	9.73666e-13	Positive
ADRB1	protein_coding	U47924.27	noncoding	0.998554	9.72555e-13	Positive
CA3	protein_coding	KB-1615E4.2	noncoding	0.998555	9.68114e-13	Positive
MTUS2	protein_coding	AC226119.4	noncoding	0.998558	9.60121e-13	Positive
LEPREL1	protein_coding	BC028670	noncoding	0.998558	9.59899e-13	Positive
CHRDL2	protein_coding	RP11-838N2.4	noncoding	0.998558	9.59233e-13	Positive
PIH1D2	protein_coding	GPX2	noncoding	0.998558	9.59233e-13	Positive
ADCY8	protein_coding	CTD-2501M5.1	noncoding	0.998558	9.58345e-13	Positive
OPRK1	protein_coding	AC007682.1	noncoding	0.998559	9.55014e-13	Positive
GOLIM4	protein_coding	XLOC_011178	noncoding	0.998561	9.48797e-13	Positive
MEPE	protein_coding	RP11-38H17.1	noncoding	0.998562	9.47464e-13	Positive
RPS6KA2	protein_coding	RP11-292F22.4	noncoding	0.998563	9.45466e-13	Positive
STMN2	protein_coding	CTB-161A2.3	noncoding	0.998563	9.43245e-13	Positive
ADH1C	protein_coding	TUBA4B	noncoding	0.998565	9.39249e-13	Positive
CUTC	protein_coding	IGL@	noncoding	0.998565	9.38361e-13	Positive
ADCY8	protein_coding	RP11-654A16.3	noncoding	0.998566	9.3392e-13	Positive
ADH1C	protein_coding	XLOC_011944	noncoding	0.998568	9.30589e-13	Positive
RARRES2	protein_coding	RP11-390P2.4	noncoding	0.99857	9.25038e-13	Positive
DYX1C1	protein_coding	XLOC_007896	noncoding	0.99857	9.23261e-13	Positive
SAMD4A	protein_coding	AC004383.4	noncoding	0.99857	9.22373e-13	Positive
VMO1	protein_coding	SLC7A7	noncoding	0.998571	9.20375e-13	Positive
ZNF711	protein_coding	BC028670	noncoding	0.998574	9.10827e-13	Positive
SCIN	protein_coding	XLOC_011944	noncoding	0.998574	9.10827e-13	Positive
OR5H6	protein_coding	RP11-810P8.1	noncoding	0.998575	9.09717e-13	Positive
GUCY1A3	protein_coding	U47924.27	noncoding	0.998576	9.06386e-13	Positive
PLEKHH2	protein_coding	PHKA2-AS1	noncoding	0.998578	9.01945e-13	Positive
STEAP1B	protein_coding	AL928768.3	noncoding	0.998578	9.00169e-13	Positive
FLRT2	protein_coding	RP11-526A4.1	noncoding	0.99858	8.96172e-13	Positive
UGT1A3	protein_coding	RP11-298J20.3	noncoding	0.998581	8.93063e-13	Positive
LRRIQ1	protein_coding	AC013264.2	noncoding	0.998582	8.90399e-13	Positive
DMP1	protein_coding	XLOC_003202	noncoding	0.998583	8.85292e-13	Positive
SERPINE2	protein_coding	RP11-38H17.1	noncoding	0.998585	8.81961e-13	Positive
NPFFR1	protein_coding	GS1-393G12.12	noncoding	0.998585	8.81517e-13	Positive
FLNB	protein_coding	CTA-313A17.5	noncoding	0.998586	8.79075e-13	Positive
MATN3	protein_coding	RP1-60O19.2	noncoding	0.998586	8.77076e-13	Positive
SPECC1L	protein_coding	RP11-163E9.2	noncoding	0.998591	8.63087e-13	Positive
LRRIQ1	protein_coding	EFCAB2	noncoding	0.998593	8.59757e-13	Positive
FZD9	protein_coding	RP11-666A20.4	noncoding	0.998594	8.5576e-13	Positive
CHSY3	protein_coding	XLOC_004067	noncoding	0.998594	8.55538e-13	Positive
RAD23A	protein_coding	RP11-217B7.2	noncoding	0.998595	8.52207e-13	Positive
ATP9A	protein_coding	CTD-2313N18.2	noncoding	0.998596	8.51319e-13	Positive
LRRC23	protein_coding	RP11-38P22.2	noncoding	0.998596	8.51319e-13	Positive
SMOC2	protein_coding	KIR3DP1	noncoding	0.998597	8.471e-13	Positive
LYST	protein_coding	XLOC_012083	noncoding	0.998597	8.46878e-13	Positive
GOLIM4	protein_coding	XLOC_011172	noncoding	0.9986	8.39329e-13	Positive
CYB5A	protein_coding	BC044655	noncoding	0.998601	8.35776e-13	Positive
PRL	protein_coding	RP11-400N13.1	noncoding	0.998604	8.30225e-13	Positive
RAB34	protein_coding	RP11-770J1.3	noncoding	0.998605	8.26006e-13	Positive
SOCS2	protein_coding	NRG3-AS1	noncoding	0.998607	8.21343e-13	Positive
NTS	protein_coding	CTD-2319I12.1	noncoding	0.998607	8.20233e-13	Positive
IRX2	protein_coding	RP11-277L2.2	noncoding	0.998608	8.18456e-13	Positive
C2orf88	protein_coding	RP11-38P22.2	noncoding	0.998611	8.10907e-13	Positive
SCUBE1	protein_coding	XLOC_011178	noncoding	0.998611	8.10907e-13	Positive
SCIN	protein_coding	EFCAB1	noncoding	0.998613	8.058e-13	Positive
NEDD4L	protein_coding	AL078621.4	noncoding	0.998613	8.058e-13	Positive
STMN2	protein_coding	XLOC_006088	noncoding	0.998613	8.05134e-13	Positive
GLIPR1	protein_coding	RP11-736K20.5	noncoding	0.998614	8.03357e-13	Positive
FXYD3	protein_coding	AC013264.2	noncoding	0.998614	8.02025e-13	Positive
PRELP	protein_coding	BC028670	noncoding	0.998615	7.99583e-13	Positive
MYH11	protein_coding	RP11-131N11.4	noncoding	0.998616	7.98028e-13	Positive
NPFFR2	protein_coding	RP11-114H24.1	noncoding	0.998616	7.9714e-13	Positive
NPFFR2	protein_coding	RP11-408H20.1	noncoding	0.998619	7.90479e-13	Positive
MEPE	protein_coding	XLOC_006928	noncoding	0.998619	7.90035e-13	Positive
ALS2CR12	protein_coding	GHRLOS	noncoding	0.998619	7.88258e-13	Positive
CDHR3	protein_coding	RP11-1C1.7	noncoding	0.998623	7.78932e-13	Positive
S100P	protein_coding	XLOC_011944	noncoding	0.998623	7.78488e-13	Positive
FDCSP	protein_coding	RP11-404P21.5	noncoding	0.998623	7.78044e-13	Positive
ENO2	protein_coding	AC004383.4	noncoding	0.998625	7.7538e-13	Positive
LRRC48	protein_coding	AC013264.2	noncoding	0.998626	7.71827e-13	Positive
SERPINE2	protein_coding	AC007682.1	noncoding	0.998626	7.70939e-13	Positive
INF2	protein_coding	LOC284440	noncoding	0.998627	7.69607e-13	Positive
KCNMB4	protein_coding	XLOC_007004	noncoding	0.998628	7.66942e-13	Positive
FKBP10	protein_coding	AK123617	noncoding	0.998628	7.65832e-13	Positive
AMY1C	protein_coding	FLJ26850	noncoding	0.998629	7.62945e-13	Positive
ENOX1	protein_coding	CTD-2325P2.4	noncoding	0.998631	7.60281e-13	Positive
LRRC10B	protein_coding	RP1-8B1.4	noncoding	0.998635	7.4829e-13	Positive
ZNF711	protein_coding	XLOC_007004	noncoding	0.998639	7.39631e-13	Positive
S100P	protein_coding	EFCAB1	noncoding	0.998642	7.32747e-13	Positive
PRRX1	protein_coding	FAS	noncoding	0.998643	7.29194e-13	Positive
GLRA3	protein_coding	CTD-2501M5.1	noncoding	0.998644	7.28084e-13	Positive
JPH2	protein_coding	WDFY3-AS2	noncoding	0.998647	7.21201e-13	Positive
SHOX	protein_coding	XLOC_000057	noncoding	0.998648	7.1676e-13	Positive
DENND2D	protein_coding	RP1-8B1.4	noncoding	0.998649	7.15428e-13	Positive
SEMA3E	protein_coding	RP11-75C9.1	noncoding	0.998654	7.02549e-13	Positive
RGS18	protein_coding	U47924.27	noncoding	0.998655	7.02105e-13	Positive
EDA	protein_coding	BCRP2	noncoding	0.998655	7.01217e-13	Positive
ADAMTSL1	protein_coding	AC226119.4	noncoding	0.998658	6.94556e-13	Positive
ZNF385B	protein_coding	LINC00592	noncoding	0.99866	6.89671e-13	Positive
TNIK	protein_coding	AC004980.7	noncoding	0.998661	6.87894e-13	Positive
TMEM200C	protein_coding	MIAT	noncoding	0.998663	6.82121e-13	Positive
TES	protein_coding	MT1DP	noncoding	0.998664	6.80123e-13	Positive
USH2A	protein_coding	XLOC_006928	noncoding	0.998664	6.79901e-13	Positive
MT1A	protein_coding	RP11-75C9.1	noncoding	0.998666	6.75904e-13	Positive
AP3B2	protein_coding	XLOC_006088	noncoding	0.998667	6.73239e-13	Positive
CRIM1	protein_coding	XLOC_011178	noncoding	0.998668	6.71463e-13	Positive
CRK	protein_coding	AC019068.2	noncoding	0.998669	6.69687e-13	Positive
FABP6	protein_coding	XLOC_000701	noncoding	0.99867	6.66578e-13	Positive
LCN2	protein_coding	RP1-8B1.4	noncoding	0.99867	6.66578e-13	Positive
DPP6	protein_coding	AC087073.1	noncoding	0.998673	6.60805e-13	Positive
NTRK2	protein_coding	RP11-400N13.1	noncoding	0.998673	6.60583e-13	Positive
PRELP	protein_coding	XLOC_007004	noncoding	0.998673	6.60361e-13	Positive
ENOX1	protein_coding	RP11-404P21.5	noncoding	0.998673	6.59917e-13	Positive
KRT23	protein_coding	XLOC_011944	noncoding	0.998673	6.59917e-13	Positive
CLDN7	protein_coding	BC028842	noncoding	0.998677	6.51035e-13	Positive
LIX1	protein_coding	AC004383.4	noncoding	0.998678	6.49258e-13	Positive
TPM1	protein_coding	FLJ00326	noncoding	0.998682	6.40377e-13	Positive
MTUS2	protein_coding	LOC100272217	noncoding	0.998683	6.36824e-13	Positive
LEPREL1	protein_coding	CSPG4P5	noncoding	0.998684	6.35936e-13	Positive
SPOCK3	protein_coding	RP11-810P8.1	noncoding	0.998686	6.31939e-13	Positive
GPR133	protein_coding	KB-1615E4.2	noncoding	0.998687	6.29052e-13	Positive
PRRG1	protein_coding	RP11-72I8.1	noncoding	0.998688	6.26832e-13	Positive
APOBEC3H	protein_coding	CTD-2313N18.2	noncoding	0.998689	6.24834e-13	Positive
SNCA	protein_coding	XLOC_012538	noncoding	0.99869	6.22613e-13	Positive
PCDHGC3	protein_coding	RP11-736K20.5	noncoding	0.99869	6.22169e-13	Positive
GK	protein_coding	AL928768.3	noncoding	0.998692	6.18172e-13	Positive
GLRA3	protein_coding	XLOC_006928	noncoding	0.998696	6.10401e-13	Positive
FAM183A	protein_coding	XLOC_007896	noncoding	0.998697	6.08402e-13	Positive
RCAN1	protein_coding	TPTEP1	noncoding	0.998697	6.08402e-13	Positive
ANK3	protein_coding	MIAT	noncoding	0.998699	6.0485e-13	Positive
CHST3	protein_coding	WDFY3-AS2	noncoding	0.998705	5.91971e-13	Positive
PTPRD	protein_coding	RP1-60O19.2	noncoding	0.998707	5.86642e-13	Positive
ITGA3	protein_coding	LINC00475	noncoding	0.998708	5.85976e-13	Positive
RSPH4A	protein_coding	XLOC_011944	noncoding	0.998708	5.85754e-13	Positive
GRB10	protein_coding	RP11-72I8.1	noncoding	0.998711	5.79092e-13	Positive
CHCHD4	protein_coding	RP11-331K21.1	noncoding	0.998712	5.7776e-13	Positive
DLX5	protein_coding	XLOC_006928	noncoding	0.998713	5.74873e-13	Positive
SOCS2	protein_coding	RP11-69I8.3	noncoding	0.998715	5.71987e-13	Positive
CERS6	protein_coding	RP11-317P15.5	noncoding	0.998715	5.71543e-13	Positive
LRRC23	protein_coding	GHRLOS	noncoding	0.998715	5.71321e-13	Positive
OPRK1	protein_coding	RP11-810P8.1	noncoding	0.99872	5.61107e-13	Positive
EYA4	protein_coding	EFCAB1	noncoding	0.998722	5.56444e-13	Positive
IBSP	protein_coding	XLOC_000424	noncoding	0.998723	5.54667e-13	Positive
CST2	protein_coding	RP11-298J20.3	noncoding	0.998723	5.54667e-13	Positive
CD109	protein_coding	WDFY3-AS2	noncoding	0.998728	5.44897e-13	Positive
MATN2	protein_coding	AC006445.8	noncoding	0.998729	5.44009e-13	Positive
ADRB1	protein_coding	XLOC_011944	noncoding	0.99873	5.42677e-13	Positive
EFCAB2	protein_coding	RP1-8B1.4	noncoding	0.998732	5.3868e-13	Positive
CD164	protein_coding	AK123617	noncoding	0.998732	5.37792e-13	Positive
OR5H6	protein_coding	RP11-254K3.1	noncoding	0.998733	5.36904e-13	Positive
SPOCK3	protein_coding	RP13-726E6.2	noncoding	0.998734	5.34461e-13	Positive
APP	protein_coding	XLOC_012083	noncoding	0.998735	5.32019e-13	Positive
SMOC2	protein_coding	AC006445.8	noncoding	0.998738	5.26468e-13	Positive
GUCY1A3	protein_coding	XLOC_011944	noncoding	0.998739	5.24691e-13	Positive
MEPE	protein_coding	RP11-308B16.2	noncoding	0.998742	5.19584e-13	Positive
PIH1D2	protein_coding	RP11-263K19.4	noncoding	0.998743	5.16698e-13	Positive
C2CD2	protein_coding	BNIP3P1	noncoding	0.998744	5.14921e-13	Positive
NEK7	protein_coding	NOP14-AS1	noncoding	0.998748	5.07594e-13	Positive
NOG	protein_coding	RP11-90D4.2	noncoding	0.998749	5.05818e-13	Positive
GUCY1A3	protein_coding	RP11-404P21.5	noncoding	0.998751	5.01821e-13	Positive
SORCS1	protein_coding	XLOC_006088	noncoding	0.998752	5.01377e-13	Positive
CPNE6	protein_coding	RP11-654A16.3	noncoding	0.998752	5.00489e-13	Positive
S100P	protein_coding	XLOC_007896	noncoding	0.998753	4.99156e-13	Positive
CCL26	protein_coding	EFCAB1	noncoding	0.998754	4.96714e-13	Positive
CRIM1	protein_coding	AC006445.8	noncoding	0.998756	4.93827e-13	Positive
MLF1	protein_coding	XLOC_007896	noncoding	0.998758	4.8983e-13	Positive
C10orf107	protein_coding	RP11-131N11.4	noncoding	0.998758	4.8983e-13	Positive
UGT1A3	protein_coding	XLOC_007896	noncoding	0.998759	4.88498e-13	Positive
C1QTNF3	protein_coding	RP11-469A15.2	noncoding	0.99876	4.87166e-13	Positive
ARHGAP31	protein_coding	RP11-1260E13.1	noncoding	0.998761	4.84723e-13	Positive
PTPRD	protein_coding	XLOC_001980	noncoding	0.998762	4.83613e-13	Positive
LEPREL1	protein_coding	XLOC_007004	noncoding	0.998762	4.82281e-13	Positive
GUCY1A3	protein_coding	EFCAB1	noncoding	0.998764	4.8006e-13	Positive
ELAVL2	protein_coding	U73167.7	noncoding	0.998766	4.76508e-13	Positive
SEMA3B	protein_coding	AK123617	noncoding	0.998766	4.7562e-13	Positive
NWD1	protein_coding	RP11-263K19.4	noncoding	0.998769	4.69846e-13	Positive
MGAT5	protein_coding	XLOC_001338	noncoding	0.998771	4.6807e-13	Positive
KCNIP4	protein_coding	RP11-254K3.1	noncoding	0.998771	4.67404e-13	Positive
AKT3	protein_coding	KRT18P55	noncoding	0.998772	4.64961e-13	Positive
RAVER2	protein_coding	BC033241	noncoding	0.998777	4.56524e-13	Positive
ROCK2	protein_coding	LDHA	noncoding	0.998781	4.50751e-13	Positive
GUCY1A3	protein_coding	RP11-298J20.3	noncoding	0.998781	4.50751e-13	Positive
GPER	protein_coding	BC028670	noncoding	0.998781	4.50084e-13	Positive
NRARP	protein_coding	EFCAB1	noncoding	0.998782	4.48086e-13	Positive
SPOCK3	protein_coding	chr7:19668825-19689525	noncoding	0.998783	4.47642e-13	Positive
SFTPC	protein_coding	XLOC_011944	noncoding	0.998785	4.43645e-13	Positive
CST2	protein_coding	EFCAB1	noncoding	0.998788	4.39204e-13	Positive
FXYD3	protein_coding	LOC100133445	noncoding	0.998789	4.3654e-13	Positive
GPR171	protein_coding	RP11-800A3.4	noncoding	0.998797	4.24327e-13	Positive
SPOCK3	protein_coding	RP11-1336O20.2	noncoding	0.998798	4.23661e-13	Positive
USH2A	protein_coding	XLOC_004244	noncoding	0.998798	4.23217e-13	Positive
BBS10	protein_coding	LINC00525	noncoding	0.998801	4.17666e-13	Positive
LRRC48	protein_coding	LOC100133445	noncoding	0.998802	4.17e-13	Positive
LDHA	protein_coding	AK021933	noncoding	0.998803	4.14779e-13	Positive
PTPRD	protein_coding	KIR3DP1	noncoding	0.998806	4.10116e-13	Positive
KCNH6	protein_coding	RP11-838N2.4	noncoding	0.998807	4.0945e-13	Positive
FANK1	protein_coding	LOC100133445	noncoding	0.99881	4.04787e-13	Positive
KIF21A	protein_coding	RP11-131N11.4	noncoding	0.99881	4.03899e-13	Positive
RIBC2	protein_coding	XLOC_012538	noncoding	0.998812	4.01013e-13	Positive
ZNF385B	protein_coding	AL035610.1	noncoding	0.998817	3.94129e-13	Positive
PIH1D2	protein_coding	LOC100133445	noncoding	0.998818	3.92353e-13	Positive
MATN2	protein_coding	XLOC_011178	noncoding	0.998818	3.91909e-13	Positive
CCDC65	protein_coding	RP11-404P21.5	noncoding	0.998818	3.91687e-13	Positive
DHRS9	protein_coding	EFCAB1	noncoding	0.998823	3.84581e-13	Positive
ZBTB49	protein_coding	BC028670	noncoding	0.998831	3.73479e-13	Positive
SAMD5	protein_coding	RP11-1336O20.2	noncoding	0.998831	3.73257e-13	Positive
VCX2	protein_coding	AC093627.6	noncoding	0.998831	3.73035e-13	Positive
UGT1A3	protein_coding	XLOC_011944	noncoding	0.998832	3.72147e-13	Positive
SGK223	protein_coding	RP11-114H24.1	noncoding	0.998832	3.72147e-13	Positive
SAMD4A	protein_coding	AC006445.8	noncoding	0.998832	3.71259e-13	Positive
PYHIN1	protein_coding	AL928768.3	noncoding	0.998837	3.64153e-13	Positive
USH2A	protein_coding	RP11-254K3.1	noncoding	0.998837	3.64153e-13	Positive
PCDH1	protein_coding	RP11-1C1.7	noncoding	0.998838	3.63709e-13	Positive
GPER	protein_coding	XLOC_007004	noncoding	0.998838	3.62821e-13	Positive
STOX1	protein_coding	RP11-263K19.4	noncoding	0.998839	3.61489e-13	Positive
VMO1	protein_coding	XLOC_007896	noncoding	0.99884	3.60156e-13	Positive
USH2A	protein_coding	HAS2-AS1	noncoding	0.998844	3.54605e-13	Positive
TRAF3IP1	protein_coding	AC006050.3	noncoding	0.998849	3.48166e-13	Positive
GSTA1	protein_coding	RP11-404P21.5	noncoding	0.998849	3.47944e-13	Positive
PPEF1	protein_coding	CTC-367J11.1	noncoding	0.99885	3.46834e-13	Positive
FGFBP2	protein_coding	PRSS44	noncoding	0.998851	3.45501e-13	Positive
GPR133	protein_coding	RP11-345F18.1	noncoding	0.998854	3.41949e-13	Positive
GPM6B	protein_coding	BC033241	noncoding	0.998854	3.41505e-13	Positive
NEDD9	protein_coding	LOC100272217	noncoding	0.998855	3.39728e-13	Positive
CATSPERD	protein_coding	XLOC_012538	noncoding	0.998859	3.34843e-13	Positive
EFCAB1	protein_coding	RP11-298J20.3	noncoding	0.998859	3.34399e-13	Positive
SERPINE2	protein_coding	RP11-400N13.1	noncoding	0.998861	3.32623e-13	Positive
ECSIT	protein_coding	TUG1	noncoding	0.998861	3.32623e-13	Positive
CFP	protein_coding	XLOC_012538	noncoding	0.998862	3.30846e-13	Positive
C9orf116	protein_coding	GHRLOS	noncoding	0.998864	3.28626e-13	Positive
PLXNA2	protein_coding	AC007682.1	noncoding	0.998864	3.28626e-13	Positive
SNTN	protein_coding	XLOC_011944	noncoding	0.998867	3.24629e-13	Positive
CD320	protein_coding	MIAT	noncoding	0.998867	3.23519e-13	Positive
GPR133	protein_coding	XLOC_007004	noncoding	0.998868	3.23297e-13	Positive
CCDC65	protein_coding	RNF157-AS1	noncoding	0.99887	3.19744e-13	Positive
CD109	protein_coding	AK123617	noncoding	0.998872	3.17524e-13	Positive
MTUS2	protein_coding	GS1-526D21.5	noncoding	0.998876	3.12861e-13	Positive
HCAR3	protein_coding	XLOC_007896	noncoding	0.998876	3.12195e-13	Positive
LIPE	protein_coding	RP11-38P22.2	noncoding	0.998878	3.10196e-13	Positive
STMN2	protein_coding	BC028670	noncoding	0.998879	3.0953e-13	Positive
NTRK2	protein_coding	chr7:19668825-19689525	noncoding	0.998879	3.08642e-13	Positive
DEFA3	protein_coding	RP11-298J20.3	noncoding	0.998883	3.04423e-13	Positive
CCDC153	protein_coding	RP11-404P21.5	noncoding	0.998886	3.00204e-13	Positive
OR5H6	protein_coding	RP11-38H17.1	noncoding	0.998886	2.99982e-13	Positive
SHOX	protein_coding	AC091133.1	noncoding	0.998889	2.96874e-13	Positive
LOC440335	protein_coding	AL928768.3	noncoding	0.998891	2.93987e-13	Positive
F3	protein_coding	XLOC_005563	noncoding	0.998896	2.88436e-13	Positive
AGK	protein_coding	RP11-367B6.2	noncoding	0.998897	2.87326e-13	Positive
NWD1	protein_coding	RP1-8B1.4	noncoding	0.998898	2.85993e-13	Positive
PRL	protein_coding	AC007682.1	noncoding	0.998899	2.85105e-13	Positive
DLX5	protein_coding	RP11-666A20.4	noncoding	0.998901	2.82885e-13	Positive
CCDC65	protein_coding	RP1-8B1.4	noncoding	0.998908	2.74447e-13	Positive
VEGFA	protein_coding	AC005013.5	noncoding	0.998909	2.73559e-13	Positive
FMOD	protein_coding	AC005162.3	noncoding	0.998911	2.71783e-13	Positive
ANK3	protein_coding	LOC646719	noncoding	0.998912	2.69784e-13	Positive
ATP9A	protein_coding	KIR3DP1	noncoding	0.998912	2.69784e-13	Positive
FBN3	protein_coding	LOC285768	noncoding	0.998916	2.65787e-13	Positive
SCIN	protein_coding	TNFSF10	noncoding	0.998918	2.62901e-13	Positive
SNTN	protein_coding	RP11-404P21.5	noncoding	0.998919	2.62013e-13	Positive
GSTA1	protein_coding	U47924.27	noncoding	0.99892	2.61569e-13	Positive
FANK1	protein_coding	AC013264.2	noncoding	0.998921	2.60236e-13	Positive
ABI3BP	protein_coding	LDHA	noncoding	0.998922	2.59126e-13	Positive
ARFGEF2	protein_coding	AC016683.6	noncoding	0.998923	2.58238e-13	Positive
YEATS2	protein_coding	ANP32C	noncoding	0.998924	2.57128e-13	Positive
SNTG1	protein_coding	AC013402.2	noncoding	0.998927	2.53131e-13	Positive
FBN3	protein_coding	XLOC_004244	noncoding	0.998929	2.51354e-13	Positive
SPOCK3	protein_coding	RP11-438D8.2	noncoding	0.99893	2.5091e-13	Positive
SNTN	protein_coding	EFCAB1	noncoding	0.998932	2.48024e-13	Positive
GPER	protein_coding	XLOC_001415	noncoding	0.998933	2.47802e-13	Positive
FBXW7	protein_coding	WDFY3-AS2	noncoding	0.998935	2.45581e-13	Positive
GSTA1	protein_coding	RP11-298J20.3	noncoding	0.998935	2.45137e-13	Positive
ERRFI1	protein_coding	LINC00607	noncoding	0.998938	2.42029e-13	Positive
CCDC153	protein_coding	CTD-2325P2.4	noncoding	0.998939	2.41585e-13	Positive
SEMA3B	protein_coding	LOC646719	noncoding	0.998939	2.41585e-13	Positive
CHRDL2	protein_coding	RP11-114H24.1	noncoding	0.99894	2.40252e-13	Positive
CA3	protein_coding	AK096159	noncoding	0.99894	2.39808e-13	Positive
CDON	protein_coding	LINC00304	noncoding	0.998942	2.38476e-13	Positive
SNTN	protein_coding	U47924.27	noncoding	0.998943	2.37588e-13	Positive
OPRK1	protein_coding	chr7:19668825-19689525	noncoding	0.998943	2.367e-13	Positive
ADRB1	protein_coding	RP11-298J20.3	noncoding	0.998944	2.36033e-13	Positive
COL6A3	protein_coding	AC004540.4	noncoding	0.998947	2.33369e-13	Positive
SAMD5	protein_coding	RP13-726E6.2	noncoding	0.998949	2.3137e-13	Positive
LRRC23	protein_coding	LOC100133445	noncoding	0.998955	2.24931e-13	Positive
KCTD3	protein_coding	RP11-341G23.4	noncoding	0.998957	2.23377e-13	Positive
HSPB8	protein_coding	AC004383.4	noncoding	0.998962	2.18492e-13	Positive
KCNIP4	protein_coding	XLOC_011178	noncoding	0.998964	2.1716e-13	Positive
FHAD1	protein_coding	RP11-404P21.5	noncoding	0.998966	2.14717e-13	Positive
WDR66	protein_coding	GHRLOS	noncoding	0.998969	2.12275e-13	Positive
C9orf24	protein_coding	EFCAB1	noncoding	0.998969	2.12053e-13	Positive
CLTB	protein_coding	AL078621.4	noncoding	0.998977	2.05169e-13	Positive
RPGR	protein_coding	FLJ26850	noncoding	0.998978	2.03837e-13	Positive
ITGA3	protein_coding	CSPG4P5	noncoding	0.998979	2.02949e-13	Positive
ADRB1	protein_coding	RP11-404P21.5	noncoding	0.998982	2.00728e-13	Positive
TBC1D8	protein_coding	U73167.7	noncoding	0.998982	2.00284e-13	Positive
FAT3	protein_coding	AC006445.8	noncoding	0.998983	1.99174e-13	Positive
TMEM100	protein_coding	RP11-838N2.4	noncoding	0.998984	1.98064e-13	Positive
SGK223	protein_coding	RP11-838N2.4	noncoding	0.998987	1.95621e-13	Positive
NT5DC3	protein_coding	U73167.7	noncoding	0.99899	1.92957e-13	Positive
DYNLRB2	protein_coding	EFCAB1	noncoding	0.998991	1.92735e-13	Positive
CHST2	protein_coding	XLOC_014244	noncoding	0.998992	1.91847e-13	Positive
YAP1	protein_coding	AF186192.1	noncoding	0.998993	1.90958e-13	Positive
PPM1K	protein_coding	RP11-72I8.1	noncoding	0.999006	1.79856e-13	Positive
DISP1	protein_coding	CTD-2313N18.2	noncoding	0.999009	1.77192e-13	Positive
SUSD5	protein_coding	XLOC_006088	noncoding	0.999013	1.74083e-13	Positive
CFP	protein_coding	RP1-8B1.4	noncoding	0.999014	1.73639e-13	Positive
ADRB1	protein_coding	EFCAB1	noncoding	0.999014	1.73639e-13	Positive
FBN3	protein_coding	RP11-308B16.2	noncoding	0.999014	1.73639e-13	Positive
SPOCK3	protein_coding	XLOC_006928	noncoding	0.999016	1.71418e-13	Positive
SPOCK3	protein_coding	RP11-308B16.2	noncoding	0.999019	1.69198e-13	Positive
C1orf88	protein_coding	U47924.27	noncoding	0.999023	1.66089e-13	Positive
DEFA3	protein_coding	RP1-8B1.4	noncoding	0.999024	1.66089e-13	Positive
SCUBE1	protein_coding	RP11-317P15.5	noncoding	0.999025	1.64535e-13	Positive
ASPH	protein_coding	CTD-2313N18.2	noncoding	0.999026	1.64535e-13	Positive
SCUBE1	protein_coding	AC006445.8	noncoding	0.999028	1.62537e-13	Positive
PITPNM3	protein_coding	CTD-2313N18.2	noncoding	0.999032	1.59872e-13	Positive
C1QTNF3	protein_coding	RP11-838N2.4	noncoding	0.999037	1.55875e-13	Positive
KCNIP4	protein_coding	CTD-2501M5.1	noncoding	0.999045	1.50324e-13	Positive
WDR66	protein_coding	AC013264.2	noncoding	0.999046	1.49436e-13	Positive
CD44	protein_coding	U47924.27	noncoding	0.999048	1.48326e-13	Positive
VLDLR	protein_coding	LINC00592	noncoding	0.99905	1.46549e-13	Positive
GLIPR1	protein_coding	LOC100506497	noncoding	0.999053	1.44329e-13	Positive
KCNMB4	protein_coding	BC028670	noncoding	0.999056	1.42997e-13	Positive
MALT1	protein_coding	AC004383.4	noncoding	0.999057	1.42109e-13	Positive
GPR64	protein_coding	TPTEP1	noncoding	0.999057	1.42109e-13	Positive
ADCY8	protein_coding	RP11-254K3.1	noncoding	0.999058	1.4122e-13	Positive
MALT1	protein_coding	XLOC_003416	noncoding	0.999068	1.35003e-13	Positive
CRTAP	protein_coding	NOP14-AS1	noncoding	0.999072	1.31894e-13	Positive
TEKT3	protein_coding	U47924.27	noncoding	0.999073	1.31228e-13	Positive
MEPE	protein_coding	RP11-254K3.1	noncoding	0.999085	1.23679e-13	Positive
PPEF1	protein_coding	CSPG4P5	noncoding	0.999086	1.23457e-13	Positive
GADD45B	protein_coding	LINC00607	noncoding	0.999087	1.23013e-13	Positive
NTRK2	protein_coding	RP11-254K3.1	noncoding	0.999087	1.23013e-13	Positive
NOG	protein_coding	XLOC_004128	noncoding	0.999087	1.22791e-13	Positive
BMP2	protein_coding	RP11-72I8.1	noncoding	0.999088	1.22125e-13	Positive
OPRK1	protein_coding	RP11-400N13.1	noncoding	0.999093	1.19016e-13	Positive
DENND2D	protein_coding	RNF157-AS1	noncoding	0.999094	1.1835e-13	Positive
STMN2	protein_coding	AC005013.5	noncoding	0.999095	1.17684e-13	Positive
CD44	protein_coding	AC013264.2	noncoding	0.999096	1.17684e-13	Positive
LPCAT1	protein_coding	CTD-2263F21.1	noncoding	0.999096	1.1724e-13	Positive
LPCAT1	protein_coding	RP11-408H20.1	noncoding	0.999099	1.15463e-13	Positive
CPNE5	protein_coding	WDFY3-AS2	noncoding	0.999103	1.13465e-13	Positive
GPR133	protein_coding	IPW	noncoding	0.999104	1.12799e-13	Positive
PCDHGC3	protein_coding	CTD-2313N18.2	noncoding	0.999114	1.0747e-13	Positive
ASPH	protein_coding	RP11-736K20.5	noncoding	0.999115	1.06581e-13	Positive
KIAA1161	protein_coding	LINC00607	noncoding	0.99912	1.04139e-13	Positive
SPOCK3	protein_coding	XLOC_004244	noncoding	0.999121	1.03251e-13	Positive
SAMD5	protein_coding	RP11-155G14.5	noncoding	0.999126	1.00808e-13	Positive
GJA1	protein_coding	XLOC_007004	noncoding	0.999126	1.00808e-13	Positive
SPOCK3	protein_coding	RP11-155G14.5	noncoding	0.999129	9.9476e-14	Positive
IFITM10	protein_coding	AC005488.13	noncoding	0.999134	9.63674e-14	Positive
CERS6	protein_coding	AC004383.4	noncoding	0.999137	9.52571e-14	Positive
RASEF	protein_coding	AC104135.3	noncoding	0.999138	9.4813e-14	Positive
TPM1	protein_coding	AC104135.3	noncoding	0.999139	9.4369e-14	Positive
ADH1C	protein_coding	RP11-298J20.3	noncoding	0.999144	9.19265e-14	Positive
APOBEC3H	protein_coding	AK023304	noncoding	0.999151	8.83738e-14	Positive
CD320	protein_coding	LINC00592	noncoding	0.999156	8.61533e-14	Positive
PDK4	protein_coding	BC033241	noncoding	0.999157	8.54872e-14	Positive
GAL	protein_coding	XLOC_011178	noncoding	0.999161	8.41549e-14	Positive
OR5H6	protein_coding	XLOC_004244	noncoding	0.999162	8.37108e-14	Positive
MALT1	protein_coding	RP11-317P15.5	noncoding	0.999163	8.30447e-14	Positive
CCDC65	protein_coding	XLOC_007896	noncoding	0.999163	8.28226e-14	Positive
VLDLR	protein_coding	MIAT	noncoding	0.999166	8.17124e-14	Positive
NACC2	protein_coding	RP11-163E9.2	noncoding	0.999168	8.08242e-14	Positive
TNNT2	protein_coding	AK123617	noncoding	0.999168	8.08242e-14	Positive
KDR	protein_coding	AC005162.3	noncoding	0.999171	7.9492e-14	Positive
CCDC65	protein_coding	RP11-298J20.3	noncoding	0.999174	7.83817e-14	Positive
TRIM4	protein_coding	RP11-163E9.2	noncoding	0.999174	7.81597e-14	Positive
SPOCK3	protein_coding	RP11-254K3.1	noncoding	0.999181	7.54952e-14	Positive
SYNPO2	protein_coding	CTD-2319I12.1	noncoding	0.999182	7.4829e-14	Positive
EYA4	protein_coding	XLOC_011944	noncoding	0.999187	7.30527e-14	Positive
MAMLD1	protein_coding	AC133528.2	noncoding	0.999188	7.23865e-14	Positive
WDR66	protein_coding	LOC100133445	noncoding	0.99919	7.19425e-14	Positive
ANK3	protein_coding	RP1-60O19.2	noncoding	0.999191	7.10543e-14	Positive
SPOCK3	protein_coding	AC007682.1	noncoding	0.999192	7.08322e-14	Positive
C1orf88	protein_coding	RP11-404P21.5	noncoding	0.999198	6.83897e-14	Positive
STMN2	protein_coding	XLOC_007004	noncoding	0.999199	6.83897e-14	Positive
COL11A2	protein_coding	BC028670	noncoding	0.999202	6.70575e-14	Positive
FBN3	protein_coding	RP11-38H17.1	noncoding	0.999206	6.57252e-14	Positive
AREG	protein_coding	RP11-263K19.4	noncoding	0.999207	6.50591e-14	Positive
ADRB1	protein_coding	XLOC_007896	noncoding	0.999217	6.15064e-14	Positive
DRD5	protein_coding	AC079776.2	noncoding	0.999217	6.12843e-14	Positive
GJA1	protein_coding	BC028670	noncoding	0.999221	5.9952e-14	Positive
SGK223	protein_coding	RP11-408H20.1	noncoding	0.999224	5.90639e-14	Positive
UGT1A3	protein_coding	EFCAB1	noncoding	0.999228	5.77316e-14	Positive
CHST3	protein_coding	XLOC_007004	noncoding	0.999228	5.77316e-14	Positive
DLX5	protein_coding	RP11-308B16.2	noncoding	0.999228	5.75096e-14	Positive
OR5H6	protein_coding	AC007682.1	noncoding	0.99923	5.70655e-14	Positive
CRYGN	protein_coding	WDFY3-AS2	noncoding	0.999232	5.63993e-14	Positive
SDC2	protein_coding	LOC441204	noncoding	0.999235	5.55112e-14	Positive
PRL	protein_coding	RP11-254K3.1	noncoding	0.999238	5.44009e-14	Positive
PRL	protein_coding	chr7:19668825-19689525	noncoding	0.999252	4.996e-14	Positive
CST2	protein_coding	RP11-404P21.5	noncoding	0.999263	4.66294e-14	Positive
FBN3	protein_coding	XLOC_006928	noncoding	0.999276	4.32987e-14	Positive
PRELP	protein_coding	WDFY3-AS2	noncoding	0.999281	4.19664e-14	Positive
FDCSP	protein_coding	U47924.27	noncoding	0.999282	4.17444e-14	Positive
S100P	protein_coding	RP11-298J20.3	noncoding	0.999288	4.01901e-14	Positive
LRRC46	protein_coding	XLOC_012538	noncoding	0.999301	3.68594e-14	Positive
GJA1	protein_coding	XLOC_006088	noncoding	0.999311	3.4639e-14	Positive
ATP9A	protein_coding	RP1-60O19.2	noncoding	0.999316	3.33067e-14	Positive
ARHGAP31	protein_coding	RP11-572M11.4	noncoding	0.99932	3.26406e-14	Positive
RSPH4A	protein_coding	EFCAB1	noncoding	0.999326	3.15303e-14	Positive
NTRK2	protein_coding	AC007682.1	noncoding	0.999331	3.01981e-14	Positive
ANK3	protein_coding	AK123617	noncoding	0.999336	2.93099e-14	Positive
GJA1	protein_coding	AC005013.5	noncoding	0.999345	2.75335e-14	Positive
HTR4	protein_coding	RP11-650K20.2	noncoding	0.999356	2.55351e-14	Positive
UBL4B	protein_coding	RP11-426C22.5	noncoding	0.999361	2.44249e-14	Positive
TSPYL2	protein_coding	GPM6A	noncoding	0.99939	1.9984e-14	Positive
CAPS	protein_coding	XLOC_007896	noncoding	0.999407	1.77636e-14	Positive
USH2A	protein_coding	RP11-308B16.2	noncoding	0.999426	1.5099e-14	Positive
CSRP2	protein_coding	XLOC_007896	noncoding	0.999434	1.42109e-14	Positive
CHST3	protein_coding	BC028670	noncoding	0.999443	1.33227e-14	Positive
GLRA3	protein_coding	RP11-308B16.2	noncoding	0.999447	1.28786e-14	Positive
CST2	protein_coding	U47924.27	noncoding	0.999448	1.28786e-14	Positive
DYNLRB2	protein_coding	RP11-298J20.3	noncoding	0.999454	1.22125e-14	Positive
CPA3	protein_coding	XLOC_007896	noncoding	0.999454	1.19904e-14	Positive
KRT23	protein_coding	EFCAB1	noncoding	0.999472	1.04361e-14	Positive
SCAF1	protein_coding	AC019068.2	noncoding	0.999473	1.04361e-14	Positive
SERPINE2	protein_coding	RP11-254K3.1	noncoding	0.99948	9.76996e-15	Positive
MALT1	protein_coding	AC006445.8	noncoding	0.999483	9.32587e-15	Positive
CATSPERD	protein_coding	Z83851.1	noncoding	0.999485	9.32587e-15	Positive
C8orf48	protein_coding	LINC00525	noncoding	0.999487	9.32587e-15	Positive
COL11A2	protein_coding	XLOC_007004	noncoding	0.999504	7.99361e-15	Positive
AMY1C	protein_coding	XLOC_007896	noncoding	0.999521	6.66134e-15	Positive
DYNLRB2	protein_coding	XLOC_011944	noncoding	0.999545	5.32907e-15	Positive
SERPINE2	protein_coding	RP11-308B16.2	noncoding	0.999553	4.88498e-15	Positive
TCEAL5	protein_coding	CSPG4P5	noncoding	0.999555	4.88498e-15	Positive
OPRK1	protein_coding	RP11-438D8.2	noncoding	0.999556	4.88498e-15	Positive
SERPINE2	protein_coding	XLOC_006928	noncoding	0.999572	3.9968e-15	Positive
SPOCK3	protein_coding	RP11-400N13.1	noncoding	0.999597	3.10862e-15	Positive
SNTN	protein_coding	RP11-298J20.3	noncoding	0.999637	1.77636e-15	Positive
STEAP1B	protein_coding	AL928742.12	noncoding	0.999651	1.77636e-15	Positive
AMY1B	protein_coding	XLOC_012538	noncoding	0.99972	4.44089e-16	Positive
PACRG	protein_coding	TNFSF10	noncoding	0.999745	4.44089e-16	Positive
FBN3	protein_coding	RP11-254K3.1	noncoding	0.999755	4.44089e-16	Positive
OR5H6	protein_coding	RP11-400N13.1	noncoding	0.999835	0	Positive
