# Supplementary material for: LncRNA and mRNA expression profiles reveal the potential roles of lncRNA contributing to regulating dural penetration in clival chordoma
Source: Aging (Albany NY). 2020 Jun 13;12(11):10809–26. doi: 10.18632/aging.103294 (PMC7346080; doi:10.18632/aging.103294)
Supplement: Supplementary Table 4 [file aging-12-103294-s001..xls]

## Sheet: Pathway analysis-down
Table S4 The down-regulated mRNAs related pathways in no dural penetration group
Number	PathwayID	Pathway name	Fisher-Pvalue	Different gene count in pathway	Enrichment score	Genes
1	hsa04510	Focal adhesion - Homo sapiens (human)	1.52331e-08	44	7.81721	AKT3//BCAR1//CAV1//CAV2//COL11A1//COL11A2//COL1A1//COL2A1//COL5A1//COL6A3//COL6A6//CRK//EGF//EGFR//FLNA//FLNB//FLT1//FN1//IBSP//ITGA1//ITGA11//ITGA3//ITGA5//ITGA6//ITGB8//KDR//LAMA4//LAMB2//MET//MYL5//PIK3CA//PIK3R1//PIK3R2//PPP1R12B//ROCK2//SHC1//SHC2//SPP1//SRC//THBS1//THBS2//TLN2//TNC//VEGFA
2	hsa04512	ECM-receptor interaction - Homo sapiens (human)	1.86366e-07	24	6.72963	AGRN//COL11A1//COL11A2//COL1A1//COL2A1//COL5A1//COL6A3//COL6A6//FN1//HSPG2//IBSP//ITGA1//ITGA11//ITGA3//ITGA5//ITGA6//ITGB8//LAMA4//LAMB2//SPP1//SV2A//THBS1//THBS2//TNC
3	hsa05100	Bacterial invasion of epithelial cells - Homo sapiens (human)	5.33313e-06	20	5.27302	ARHGEF26//BCAR1//CAV1//CAV2//CLTB//CRK//FN1//ITGA5//MET//PIK3CA//PIK3R1//PIK3R2//SEPT11//SEPT2//SEPT6//SHC1//SHC2//SRC//WASF1//WASL
4	hsa05205	Proteoglycans in cancer - Homo sapiens (human)	9.94363e-06	40	5.00246	AKT3//ANK3//CAMK2B//CAMK2D//CAV1//CAV2//CDKN1A//EGFR//FGF1//FGFR1//FLNA//FLNB//FN1//FRS2//FZD4//FZD7//FZD8//FZD9//GPC1//HPSE//HSPG2//IQGAP1//ITGA5//ITPR3//KDR//MAPK12//MET//PIK3CA//PIK3R1//PIK3R2//PPP1R12B//PTCH1//ROCK2//SDC2//SLC9A1//SRC//THBS1//TIMP3//VEGFA//WNT5B
5	hsa04151	PI3K-Akt signaling pathway - Homo sapiens (human)	1.60092e-05	54	4.79563	AKT3//BCL2L1//CDK6//CDKN1A//CHRM2//COL11A1//COL11A2//COL1A1//COL2A1//COL5A1//COL6A3//COL6A6//CREB3//EFNA1//EGF//EGFR//EPHA2//FGF1//FGFR1//FGFR2//FLT1//FN1//G6PC2//GHR//GNG4//IBSP//IRS1//ITGA1//ITGA11//ITGA3//ITGA5//ITGA6//ITGB8//KDR//LAMA4//LAMB2//MET//NGFR//OSMR//PHLPP2//PIK3CA//PIK3R1//PIK3R2//PPP2R3A//PRL//RPTOR//SPP1//THBS1//THBS2//THEM4//TNC//VEGFA//YWHAG//YWHAH
6	hsa04360	Axon guidance - Homo sapiens (human)	8.75868e-05	25	4.05756	ABLIM2//ABLIM3//DPYSL2//EFNA1//EPHA1//EPHA2//EPHA3//MET//NCK2//NTNG1//PLXNA2//PLXNA3//PLXNB2//PPP3CA//RHOD//ROCK2//SEMA3B//SEMA3C//SEMA3E//SEMA4C//SEMA5A//SEMA6A//SEMA6D//SLIT2//UNC5B
7	hsa04390	Hippo signaling pathway - Homo sapiens (human)	0.000128635	28	3.89064	AXIN1//BMP2//BMP5//BMP8B//CSNK1E//CTGF//DLG1//DLG2//FGF1//FRMD6//FZD4//FZD7//FZD8//FZD9//GDF5//INADL//LIMD1//NF2//SERPINE1//SNAI2//TEAD1//TGFB3//TGFBR2//WNT5B//WTIP//YAP1//YWHAG//YWHAH
8	hsa05410	Hypertrophic cardiomyopathy (HCM) - Homo sapiens (human)	0.000957502	17	3.01886	ACE//AGT//CACNA2D2//CACNA2D3//ITGA1//ITGA11//ITGA3//ITGA5//ITGA6//ITGB8//MYL3//SGCD//TGFB3//TNNC1//TNNT2//TPM1//TTN
9	hsa04012	ErbB signaling pathway - Homo sapiens (human)	0.00125706	17	2.90064	ABL2//AKT3//CAMK2B//CAMK2D//CDKN1A//CRK//EGF//EGFR//NCK2//NRG1//PIK3CA//PIK3R1//PIK3R2//SHC1//SHC2//SRC//TGFA
10	hsa05214	Glioma - Homo sapiens (human)	0.00368823	13	2.43318	AKT3//CAMK2B//CAMK2D//CDK6//CDKN1A//EGF//EGFR//PIK3CA//PIK3R1//PIK3R2//SHC1//SHC2//TGFA
11	hsa04810	Regulation of actin cytoskeleton - Homo sapiens (human)	0.00376658	31	2.42405	BAIAP2//BCAR1//CHRM2//CRK//DIAPH3//EGF//EGFR//FGF1//FGFR1//FGFR2//FN1//GNA12//GSN//IQGAP1//ITGA1//ITGA11//ITGA3//ITGA5//ITGA6//ITGB8//MYL5//PIK3CA//PIK3R1//PIK3R2//PIP5K1A//PPP1R12B//ROCK2//SLC9A1//SRC//WASF1//WASL
12	hsa04978	Mineral absorption - Homo sapiens (human)	0.00400825	11	2.39704	CLCN2//CYBRD1//MT1B//MT1E//MT1G//MT1M//MT1X//MT2A//SLC46A1//TRPM6//VDR
13	hsa05412	Arrhythmogenic right ventricular cardiomyopathy (ARVC) - Homo sapiens (human)	0.00447381	14	2.34932	CACNA2D2//CACNA2D3//CDH2//DSC2//DSG2//GJA1//ITGA1//ITGA11//ITGA3//ITGA5//ITGA6//ITGB8//PKP2//SGCD
14	hsa04066	HIF-1 signaling pathway - Homo sapiens (human)	0.00464147	18	2.33335	AKT3//CAMK2B//CAMK2D//CDKN1A//EGF//EGFR//EGLN1//EGLN3//ENO2//FLT1//LDHA//PDHA1//PIK3CA//PIK3R1//PIK3R2//SERPINE1//SLC2A1//VEGFA
15	hsa05414	Dilated cardiomyopathy - Homo sapiens (human)	0.00468466	16	2.32932	ADCY8//CACNA2D2//CACNA2D3//ITGA1//ITGA11//ITGA3//ITGA5//ITGA6//ITGB8//MYL3//SGCD//TGFB3//TNNC1//TNNT2//TPM1//TTN
16	hsa05200	Pathways in cancer - Homo sapiens (human)	0.00716451	42	2.14481	AKT3//AXIN1//BCL2L1//BCR//BMP2//CDK6//CDKN1A//CDKN2B//CRK//DAPK2//EGF//EGFR//EGLN1//EGLN3//FGF1//FGFR1//FGFR2//FN1//FZD4//FZD7//FZD8//FZD9//GLI1//HHIP//ITGA3//ITGA6//LAMA4//LAMB2//MET//MITF//PIK3CA//PIK3R1//PIK3R2//PPARG//PTCH1//SLC2A1//TGFA//TGFB3//TGFBR2//VEGFA//WNT5B//ZBTB16
17	hsa04722	Neurotrophin signaling pathway - Homo sapiens (human)	0.00799881	19	2.09698	AKT3//CAMK2B//CAMK2D//CRK//FRS2//IRAK1//IRS1//KIDINS220//MAPK12//MAPK7//NGFR//NGFRAP1//NTRK2//NTRK3//PIK3CA//PIK3R1//PIK3R2//SHC1//SHC2
18	hsa05220	Chronic myeloid leukemia - Homo sapiens (human)	0.010139	13	1.99401	AKT3//BCL2L1//BCR//CDK6//CDKN1A//CRK//PIK3CA//PIK3R1//PIK3R2//SHC1//SHC2//TGFB3//TGFBR2
19	hsa04144	Endocytosis - Homo sapiens (human)	0.0104504	28	1.98087	AGAP3//AP2B1//ARFGAP1//ASAP2//CAV1//CAV2//CLTB//EGF//EGFR//EHD2//EHD4//EPN1//FGFR2//FLT1//IQSEC1//IQSEC2//KDR//MET//NEDD4L//PIP5K1A//PSD2//RAB11FIP3//RAB11FIP5//SH3GL1//SRC//TGFB3//TGFBR2//ZFYVE9
20	hsa05211	Renal cell carcinoma - Homo sapiens (human)	0.0112605	12	1.94844	AKT3//CRK//EGLN1//EGLN3//MET//PIK3CA//PIK3R1//PIK3R2//SLC2A1//TGFA//TGFB3//VEGFA
21	hsa05212	Pancreatic cancer - Homo sapiens (human)	0.0112605	12	1.94844	AKT3//BCL2L1//CDK6//EGF//EGFR//PIK3CA//PIK3R1//PIK3R2//TGFA//TGFB3//TGFBR2//VEGFA
22	hsa04310	Wnt signaling pathway - Homo sapiens (human)	0.0183065	20	1.7374	AXIN1//CAMK2B//CAMK2D//CSNK1A1//CSNK1E//CXXC4//DAAM2//FZD4//FZD7//FZD8//FZD9//LRP5//NKD2//PLCB1//PPP3CA//PRICKLE2//ROCK2//TBL1X//WIF1//WNT5B
23	hsa00600	Sphingolipid metabolism - Homo sapiens (human)	0.0192543	9	1.71547	ACER1//CERS1//CERS4//CERS6//GAL3ST1//SGMS2//SMPD1//SMPD4//SPTLC3
24	hsa05218	Melanoma - Homo sapiens (human)	0.0196253	12	1.70718	AKT3//CDK6//CDKN1A//EGF//EGFR//FGF1//FGFR1//MET//MITF//PIK3CA//PIK3R1//PIK3R2
25	hsa05217	Basal cell carcinoma - Homo sapiens (human)	0.019812	10	1.70307	AXIN1//BMP2//FZD4//FZD7//FZD8//FZD9//GLI1//HHIP//PTCH1//WNT5B
26	hsa04350	TGF-beta signaling pathway - Homo sapiens (human)	0.0210831	13	1.67606	BMP2//BMP5//BMP8B//CDKN2B//FST//GDF5//ID4//NOG//SMAD9//TGFB3//TGFBR2//THBS1//ZFYVE9
27	hsa00780	Biotin metabolism - Homo sapiens (human)	0.0217309	2	1.66292	BTD//HLCS
28	hsa04340	Hedgehog signaling pathway - Homo sapiens (human)	0.0314866	9	1.50188	BMP2//CSNK1A1//CSNK1E//CSNK1G3//GLI1//HHIP//LRP2//PTCH1//WNT5B
29	hsa04115	p53 signaling pathway - Homo sapiens (human)	0.0333325	11	1.47713	CCNG1//CDK6//CDKN1A//GADD45A//GADD45B//IGFBP3//RRM2//SERPINE1//SESN3//THBS1//TP53I3
30	hsa04261	Adrenergic signaling in cardiomyocytes - Homo sapiens (human)	0.035752	20	1.4467	ADCY8//ADRA1A//AKT3//CACNA2D2//CACNA2D3//CAMK2B//CAMK2D//CREB3//MAPK12//MYL3//PIK3CA//PIK3R1//PIK3R2//PLCB1//PPP2R3A//SCN1B//SLC9A1//TNNC1//TNNT2//TPM1
31	hsa05222	Small cell lung cancer - Homo sapiens (human)	0.0360221	13	1.44343	AKT3//BCL2L1//CDK6//CDKN2B//FHIT//FN1//ITGA3//ITGA6//LAMA4//LAMB2//PIK3CA//PIK3R1//PIK3R2
32	hsa04370	VEGF signaling pathway - Homo sapiens (human)	0.0381491	10	1.41852	AKT3//KDR//MAPK12//PIK3CA//PIK3R1//PIK3R2//PPP3CA//SHC2//SRC//VEGFA
33	hsa04974	Protein digestion and absorption - Homo sapiens (human)	0.0423655	13	1.37299	COL11A1//COL11A2//COL13A1//COL1A1//COL2A1//COL5A1//COL6A3//COL6A6//COL9A1//COL9A2//COL9A3//CPA2//SLC8A3
34	hsa00230	Purine metabolism - Homo sapiens (human)	0.0432455	22	1.36406	ADCY8//ENPP1//ENTPD6//FHIT//GDA//IMPDH1//NME6//NPR2//NT5C1A//NT5E//PAPSS2//PDE2A//PDE3A//PDE3B//PDE5A//PDE6B//PFAS//PGM1//POLD2//POLR3C//POLR3H//RRM2
35	hsa04020	Calcium signaling pathway - Homo sapiens (human)	0.0444318	23	1.35231	ADCY8//ADRA1A//CACNA1G//CAMK2B//CAMK2D//CHRM2//DRD5//EGFR//GNA11//HTR4//ITPKC//ITPR3//ORAI2//PHKA2//PLCB1//PLCD3//PPP3CA//RYR1//SLC25A4//SLC8A3//TACR1//TNNC1//VDAC1
36	hsa04540	Gap junction - Homo sapiens (human)	0.0458147	13	1.33899	ADCY8//EGF//EGFR//GJA1//GNA11//ITPR3//MAPK7//PLCB1//SRC//TUBA8//TUBB2A//TUBB3//TUBB4A
37	hsa04070	Phosphatidylinositol signaling system - Homo sapiens (human)	0.0489734	12	1.31004	DGKG//IMPA1//INPP5A//IPPK//ITPKC//ITPR3//PIK3CA//PIK3R1//PIK3R2//PIP5K1A//PLCB1//PLCD3
38	hsa00512	Mucin type O-Glycan biosynthesis - Homo sapiens (human)	0.0494997	6	1.3054	C1GALT1//GALNT10//GALNT2//GALNT3//ST3GAL1//WBSCR17
