# Supplementary material for: LncRNA and mRNA expression profiles reveal the potential roles of lncRNA contributing to regulating dural penetration in clival chordoma
Source: Aging (Albany NY). 2020 Jun 13;12(11):10809–26. doi: 10.18632/aging.103294 (PMC7346080; doi:10.18632/aging.103294)
Supplement: Supplementary Table 5 [file aging-12-103294-s002..xls]

## Sheet: Pathway analysis-up
Table S5 The up-regulated mRNAs related pathways in no dural penetration group
Number	PathwayID	Pathway name	Fisher Pvalue	Different gene count in pathway	Enrichment score	Genes
1	hsa04062	Chemokine signaling pathway - Homo sapiens (human)	1.44983e-10	43	9.83868	ADRBK2//ARRB2//CCL13//CCL14//CCL16//CCL17//CCL2//CCL26//CCL3L1//CCL3L3//CCL4//CCL4L1//CCL8//CCR5//CCR7//CXCL10//CXCL11//CXCL12//CXCL13//CXCL16//CXCL2//CXCL9//CXCR4//ELMO1//GRK5//HCK//KRAS//LYN//NCF1//PAK1//PF4//PIK3CG//PLCB4//PPBP//PRKACG//PRKCB//RAP1B//RASGRP2//STAT1//VAV1//WAS//XCL1//XCL2
2	hsa04060	Cytokine-cytokine receptor interaction - Homo sapiens (human)	4.09296e-10	53	9.38796	BMP7//BMPR1B//CCL13//CCL14//CCL16//CCL17//CCL2//CCL26//CCL3L1//CCL3L3//CCL4//CCL4L1//CCL8//CCR5//CCR7//CD27//CD40LG//CSF2//CSF2RA//CSF3R//CSH1//CXCL10//CXCL11//CXCL12//CXCL13//CXCL16//CXCL2//CXCL9//CXCR4//FAS//IFNAR2//IFNE//IL10RA//IL12B//IL15//IL18RAP//IL1B//IL1R2//IL1RAP//IL2RG//IL7R//LTB//OSM//PDGFA//PF4//PPBP//TNFRSF10A//TNFRSF17//TNFSF10//TNFSF13//TNFSF13B//XCL1//XCL2
3	hsa04640	Hematopoietic cell lineage - Homo sapiens (human)	4.89728e-08	24	7.31004	ANPEP//CD2//CD22//CD36//CD38//CD3D//CD3E//CD3G//CD44//CD5//CD55//CD7//CD8B//CSF2//CSF2RA//CSF3R//FCGR1A//HLA-DRA//HLA-DRB4//IL1B//IL1R2//IL7R//ITGA4//MS4A1
4	hsa05152	Tuberculosis - Homo sapiens (human)	1.4445e-07	36	6.84028	ATP6V0A4//BID//CALML3//CALML5//CAMK2B//CAMP//CASP10//CASP8//CEBPG//CLEC4E//CLEC7A//CTSS//FCER1G//FCGR1A//FCGR2A//FCGR2B//FCGR3A//HLA-DMB//HLA-DOB//HLA-DQA1//HLA-DRA//HLA-DRB4//IL10RA//IL12B//IL1B//IRAK2//ITGAX//LSP1//MAPK13//MAPK8//NOD2//NOS2//STAT1//TLR1//TLR2//TLR4
5	hsa05140	Leishmaniasis - Homo sapiens (human)	1.61913e-07	21	6.79072	FCGR1A//FCGR2A//FCGR3A//HLA-DMB//HLA-DOB//HLA-DQA1//HLA-DRA//HLA-DRB4//IL12B//IL1B//ITGA4//MAPK13//NCF1//NCF2//NCF4//NOS2//PRKCB//PTPN6//STAT1//TLR2//TLR4
6	hsa05323	Rheumatoid arthritis - Homo sapiens (human)	1.7063e-06	22	5.76794	ATP6V0A4//CCL2//CCL3L1//CCL3L3//CD86//CSF2//CTLA4//CXCL12//HLA-DMB//HLA-DOB//HLA-DQA1//HLA-DRA//HLA-DRB4//IL15//IL1B//ITGAL//LTB//TEK//TLR2//TLR4//TNFSF13//TNFSF13B
7	hsa04514	Cell adhesion molecules (CAMs) - Homo sapiens (human)	2.72075e-06	29	5.56531	CD2//CD22//CD40LG//CD58//CD86//CD8B//CLDN1//CLDN4//CLDN7//CLDN8//CLDN9//CNTN2//CTLA4//HLA-B//HLA-DMB//HLA-DOB//HLA-DQA1//HLA-DRA//HLA-DRB4//HLA-G//ITGA4//ITGAL//ITGB7//NRCAM//PECAM1//PTPRC//SELE//SELPLG//TIGIT
8	hsa04672	Intestinal immune network for IgA production - Homo sapiens (human)	3.41871e-06	15	5.46614	CD40LG//CD86//CXCL12//CXCR4//HLA-DMB//HLA-DOB//HLA-DQA1//HLA-DRA//HLA-DRB4//IL15//ITGA4//ITGB7//TNFRSF17//TNFSF13//TNFSF13B
9	hsa04970	Salivary secretion - Homo sapiens (human)	5.38968e-06	21	5.26844	ADRB1//AMY1B//AMY1C//AQP5//CALML3//CALML5//CAMP//CD38//CST1//CST2//CST4//DMBT1//FXYD2//GUCY1A3//ITPR1//LPO//LYZ//PLCB4//PRB2//PRKACG//PRKCB
10	hsa05150	Staphylococcus aureus infection - Homo sapiens (human)	5.72169e-06	16	5.24248	C5AR1//CFB//CFI//FCAR//FCGR1A//FCGR2A//FCGR2B//FCGR3A//FPR3//HLA-DMB//HLA-DOB//HLA-DQA1//HLA-DRA//HLA-DRB4//ITGAL//SELPLG
11	hsa04670	Leukocyte transendothelial migration - Homo sapiens (human)	1.4706e-05	24	4.83251	ACTN2//CLDN1//CLDN4//CLDN7//CLDN8//CLDN9//CXCL12//CXCR4//CYBB//ITGA4//ITGAL//MAPK13//MMP2//MYL7//NCF1//NCF2//NCF4//PECAM1//PIK3CG//PRKCB//RAP1B//RHOH//TXK//VAV1
12	hsa04940	Type I diabetes mellitus - Homo sapiens (human)	3.08944e-05	13	4.51012	CD86//FAS//GZMB//HLA-B//HLA-DMB//HLA-DOB//HLA-DQA1//HLA-DRA//HLA-DRB4//HLA-G//ICA1//IL12B//IL1B
13	hsa05330	Allograft rejection - Homo sapiens (human)	3.10614e-05	12	4.50778	CD40LG//CD86//FAS//GZMB//HLA-B//HLA-DMB//HLA-DOB//HLA-DQA1//HLA-DRA//HLA-DRB4//HLA-G//IL12B
14	hsa05321	Inflammatory bowel disease (IBD) - Homo sapiens (human)	5.23835e-05	16	4.2808	FOXP3//HLA-DMB//HLA-DOB//HLA-DQA1//HLA-DRA//HLA-DRB4//IL12B//IL17F//IL18RAP//IL1B//IL2RG//NOD2//STAT1//STAT4//TLR2//TLR4
15	hsa05340	Primary immunodeficiency - Homo sapiens (human)	7.1557e-05	11	4.14535	BLNK//BTK//CD3D//CD3E//CD40LG//CD79A//CD8B//DCLRE1C//IL2RG//IL7R//PTPRC
16	hsa04620	Toll-like receptor signaling pathway - Homo sapiens (human)	7.51363e-05	21	4.12415	CASP8//CCL3L1//CCL3L3//CCL4//CCL4L1//CD86//CXCL10//CXCL11//CXCL9//IFNAR2//IL12B//IL1B//LY96//MAP3K8//MAPK13//MAPK8//PIK3CG//STAT1//TLR1//TLR2//TLR4
17	hsa04064	NF-kappa B signaling pathway - Homo sapiens (human)	7.83415e-05	19	4.10601	BCL2A1//BLNK//BTK//CCL13//CCL4//CCL4L1//CD40LG//CFLAR//CXCL12//CXCL2//IL1B//LTB//LY96//LYN//PLAU//PRKCB//PRKCQ//TLR4//TNFSF13B
18	hsa04145	Phagosome - Homo sapiens (human)	8.02331e-05	27	4.09565	ATP6V0A4//CD36//CLEC7A//CTSS//CYBB//DYNC2H1//FCAR//FCGR1A//FCGR2A//FCGR2B//FCGR3A//HLA-B//HLA-DMB//HLA-DOB//HLA-DQA1//HLA-DRA//HLA-DRB4//HLA-G//MSR1//NCF1//NCF2//NCF4//TLR2//TLR4//TUBA1A//TUBB1//TUBB8
19	hsa04380	Osteoclast differentiation - Homo sapiens (human)	8.78083e-05	24	4.05647	BLNK//BTK//CYBB//FCGR1A//FCGR2A//FCGR2B//FCGR3A//IFNAR2//IL1B//LILRA3//LILRA5//LILRB1//LILRB2//LILRB3//MAPK13//MAPK8//NCF1//NCF2//NCF4//PIK3CG//SIRPB1//SPI1//STAT1//TYROBP
20	hsa05332	Graft-versus-host disease - Homo sapiens (human)	9.06192e-05	12	4.04278	CD86//FAS//GZMB//HLA-B//HLA-DMB//HLA-DOB//HLA-DQA1//HLA-DRA//HLA-DRB4//HLA-G//IL1B//KLRC1
21	hsa05142	Chagas disease (American trypanosomiasis) - Homo sapiens (human)	0.000170266	20	3.76887	CASP8//CCL2//CCL3L1//CCL3L3//CD3D//CD3E//CD3G//CFLAR//FAS//GNA15//IL12B//IL1B//MAPK13//MAPK8//NOS2//PIK3CG//PLCB4//PPP2R2B//TLR2//TLR4
22	hsa04650	Natural killer cell mediated cytotoxicity - Homo sapiens (human)	0.000181154	24	3.74195	BID//CD48//CSF2//FAS//FCER1G//FCGR3A//GZMB//HCST//HLA-B//HLA-G//IFNAR2//ITGAL//KLRC1//KLRK1//KRAS//PAK1//PIK3CG//PRKCB//PTPN6//SH2D1A//TNFRSF10A//TNFSF10//TYROBP//VAV1
23	hsa00980	Metabolism of xenobiotics by cytochrome P450 - Homo sapiens (human)	0.000185533	16	3.73158	ADH1A//ADH1B//ADH1C//ADH6//AKR1C2//AKR1C4//CYP2A13//CYP2A6//CYP2B6//GSTA1//GSTA2//GSTM1//MGST2//UGT1A3//UGT1A6//UGT1A8
24	hsa00830	Retinol metabolism - Homo sapiens (human)	0.000408548	14	3.38876	ADH1A//ADH1B//ADH1C//ADH6//ALDH1A2//AOX1//CYP2A6//CYP2B6//DHRS9//RDH10//SDR16C5//UGT1A3//UGT1A6//UGT1A8
25	hsa04621	NOD-like receptor signaling pathway - Homo sapiens (human)	0.000425391	13	3.37121	CARD8//CASP1//CASP5//CASP8//CCL2//CXCL2//IL1B//MAPK13//MAPK8//NAIP//NLRP3//NOD2//PSTPIP1
26	hsa05204	Chemical carcinogenesis - Homo sapiens (human)	0.000474761	16	3.32353	ADH1A//ADH1B//ADH1C//ADH6//AKR1C2//CYP2A13//CYP2A6//GSTA1//GSTA2//GSTM1//MGST2//NAT1//SULT1A4//UGT1A3//UGT1A6//UGT1A8
27	hsa04270	Vascular smooth muscle contraction - Homo sapiens (human)	0.000611103	22	3.21388	ACTA2//ADORA2B//CACNA1C//CACNA1F//CALCA//CALML3//CALML5//EDN1//EDNRA//GUCY1A3//ITPR1//KCNMB2//KCNMB3//MYH11//MYLK//PLA2G10//PLA2G2A//PLCB4//PRKACG//PRKCB//PRKCH//PRKCQ
28	hsa05416	Viral myocarditis - Homo sapiens (human)	0.000719207	13	3.14315	BID//CASP8//CD40LG//CD55//CD86//HLA-B//HLA-DMB//HLA-DOB//HLA-DQA1//HLA-DRA//HLA-DRB4//HLA-G//ITGAL
29	hsa00982	Drug metabolism - cytochrome P450 - Homo sapiens (human)	0.000781885	14	3.10686	ADH1A//ADH1B//ADH1C//ADH6//AOX1//CYP2A6//CYP2B6//GSTA1//GSTA2//GSTM1//MGST2//UGT1A3//UGT1A6//UGT1A8
30	hsa05320	Autoimmune thyroid disease - Homo sapiens (human)	0.000900987	12	3.04528	CD40LG//CD86//CTLA4//FAS//GZMB//HLA-B//HLA-DMB//HLA-DOB//HLA-DQA1//HLA-DRA//HLA-DRB4//HLA-G
31	hsa04668	TNF signaling pathway - Homo sapiens (human)	0.000997181	19	3.00123	CASP10//CASP8//CCL2//CFLAR//CREB3L3//CSF2//CXCL10//CXCL2//EDN1//FAS//IL15//IL1B//MAP3K8//MAPK13//MAPK8//NOD2//PIK3CG//RPS6KA5//SELE
32	hsa05145	Toxoplasmosis - Homo sapiens (human)	0.00117632	20	2.92948	ALOX5//CASP8//CCR5//CD40LG//HLA-DMB//HLA-DOB//HLA-DQA1//HLA-DRA//HLA-DRB4//HSPA6//IL10RA//IL12B//LY96//MAPK13//MAPK8//NOS2//PIK3CG//STAT1//TLR2//TLR4
33	hsa04660	T cell receptor signaling pathway - Homo sapiens (human)	0.00131113	18	2.88236	CD3D//CD3E//CD3G//CD40LG//CD8B//CSF2//CTLA4//GRAP2//KRAS//MAP3K8//MAPK13//PAK1//PIK3CG//PRKCQ//PTPN6//PTPRC//RASGRP1//VAV1
34	hsa05144	Malaria - Homo sapiens (human)	0.00133899	11	2.87322	CCL2//CD36//CD40LG//HBB//IL1B//ITGAL//KLRK1//PECAM1//SELE//TLR2//TLR4
35	hsa04662	B cell receptor signaling pathway - Homo sapiens (human)	0.00140985	14	2.85083	BLNK//BTK//CD22//CD79A//CD79B//DAPP1//FCGR2B//KRAS//LILRB3//LYN//PIK3CG//PRKCB//PTPN6//VAV1
36	hsa05164	Influenza A - Homo sapiens (human)	0.0016276	26	2.78845	CASP1//CCL2//CXCL10//FAS//HLA-DMB//HLA-DOB//HLA-DQA1//HLA-DRA//HLA-DRB4//HSPA6//IFNAR2//IL12B//IL1B//IL33//MAPK13//MAPK8//NLRP3//OAS2//PIK3CG//PRKCB//RSAD2//STAT1//TLR4//TMPRSS4//TNFRSF10A//TNFSF10
37	hsa05202	Transcriptional misregulation in cancer - Homo sapiens (human)	0.00191648	26	2.71749	BCL2A1//BMP2K//CCR7//CD86//CSF2//DEFA3//DUSP6//EYA1//FCGR1A//FLI1//FUT8//GZMB//H3F3B//HIST1H3H//HIST1H3I//HPGD//IL1R2//ITGB7//MLF1//NR4A3//PAX3//PDGFA//PLAU//RARA//RUNX1//SPI1
38	hsa05162	Measles - Homo sapiens (human)	0.00199348	21	2.70039	CD3D//CD3E//CD3G//FAS//FCGR2B//HSPA6//IFNAR2//IL12B//IL1B//IL2RG//OAS2//PIK3CG//PRKCQ//SH2D1A//SLAMF1//STAT1//TLR2//TLR4//TNFRSF10A//TNFSF10//TP73
39	hsa04666	Fc gamma R-mediated phagocytosis - Homo sapiens (human)	0.00202009	16	2.69463	FCGR1A//FCGR2A//FCGR2B//FCGR3A//HCK//LYN//NCF1//PAK1//PIK3CG//PPAP2B//PPAP2C//PRKCB//PTPRC//SCIN//VAV1//WAS
40	hsa05310	Asthma - Homo sapiens (human)	0.00294156	8	2.53142	CD40LG//FCER1G//HLA-DMB//HLA-DOB//HLA-DQA1//HLA-DRA//HLA-DRB4//PRG2
41	hsa04210	Apoptosis - Homo sapiens (human)	0.00299002	15	2.52433	BID//CASP10//CASP12//CASP8//CFLAR//FAS//IL1B//IL1RAP//IRAK2//IRAK3//PIK3CG//PRKACG//PRKAR2B//TNFRSF10A//TNFSF10
42	hsa05143	African trypanosomiasis - Homo sapiens (human)	0.00440769	8	2.35579	FAS//HBB//IDO1//IL12B//IL1B//PLCB4//PRKCB//SELE
43	hsa05322	Systemic lupus erythematosus - Homo sapiens (human)	0.00532803	20	2.27343	ACTN2//CD40LG//CD86//FCGR1A//FCGR2A//FCGR3A//H3F3B//HIST1H2BD//HIST1H2BG//HIST1H2BH//HIST1H2BJ//HIST1H3H//HIST1H3I//HIST1H4L//HIST2H2BF//HLA-DMB//HLA-DOB//HLA-DQA1//HLA-DRA//HLA-DRB4
44	hsa05146	Amoebiasis - Homo sapiens (human)	0.00542672	17	2.26546	ACTN2//COL3A1//CSF2//GNA15//IL12B//IL1B//IL1R2//NOS2//PIK3CG//PLCB4//PRKACG//PRKCB//SERPINB10//SERPINB3//SERPINB6//TLR2//TLR4
45	hsa04722	Neurotrophin signaling pathway - Homo sapiens (human)	0.00649793	18	2.18723	ARHGDIB//BDNF//CALML3//CALML5//CAMK2B//IRAK2//IRAK3//KRAS//MAPK13//MAPK8//MAPKAPK2//MATK//NTF4//PIK3CG//RAP1B//RPS6KA2//RPS6KA5//TP73
46	hsa05132	Salmonella infection - Homo sapiens (human)	0.00762899	14	2.11753	CASP1//CCL3L1//CCL3L3//CCL4//CCL4L1//CSF2//CXCL2//DYNC2H1//IL1B//MAPK13//MAPK8//NOS2//TLR4//WAS
47	hsa04020	Calcium signaling pathway - Homo sapiens (human)	0.00899481	24	2.04601	ADORA2B//ADRB1//ATP2A3//CACNA1C//CACNA1F//CACNA1G//CALML3//CALML5//CAMK2B//CD38//CYSLTR2//EDNRA//GNA15//ITPR1//MYLK//NOS2//OXTR//PLCB4//PLN//PRKACG//PRKCB//PTGER3//SLC8A1//VDAC2
48	hsa05166	HTLV-I infection - Homo sapiens (human)	0.00910817	32	2.04057	BUB3//CD3D//CD3E//CD3G//CREM//CSF2//FZD2//HLA-B//HLA-DMB//HLA-DOB//HLA-DQA1//HLA-DRA//HLA-DRB4//HLA-G//IL15//IL1R2//IL2RG//ITGAL//KRAS//MAD2L1//MAPK8//MYB//MYBL1//NFATC4//PDGFA//PIK3CG//PRKACG//PTTG1//SPI1//TP53INP1//VDAC2//WNT3
49	hsa04010	MAPK signaling pathway - Homo sapiens (human)	0.0127119	31	1.89579	ARRB2//BDNF//CACNA1C//CACNA1F//CACNA1G//DUSP6//FAS//FGFR2//GADD45G//HSPA6//IL1B//IL1R2//KRAS//MAP3K8//MAP4K1//MAPK13//MAPK8//MAPKAPK2//MECOM//NR4A1//NTF4//PAK1//PDGFA//PRKACG//PRKCB//PTPN7//RAP1B//RASGRP1//RASGRP2//RPS6KA2//RPS6KA5
50	hsa00140	Steroid hormone biosynthesis - Homo sapiens (human)	0.0136089	10	1.86618	AKR1C2//AKR1C3//AKR1C4//CYP11B1//HSD17B8//SRD5A2//SULT1E1//UGT1A3//UGT1A6//UGT1A8
51	hsa04261	Adrenergic signaling in cardiomyocytes - Homo sapiens (human)	0.014331	20	1.84373	ADRB1//CACNA1C//CACNA1F//CALML3//CALML5//CAMK2B//CREB3L3//CREM//FXYD2//KCNE1//MAPK13//PIK3CG//PLCB4//PLN//PPP2R2B//PRKACG//RPS6KA5//SCN7A//SLC8A1//TPM3
52	hsa04720	Long-term potentiation - Homo sapiens (human)	0.0160365	11	1.79489	CACNA1C//CALML3//CALML5//CAMK2B//ITPR1//KRAS//PLCB4//PRKACG//PRKCB//RAP1B//RPS6KA2
53	hsa03320	PPAR signaling pathway - Homo sapiens (human)	0.0197149	11	1.70521	ACSL1//ACSL4//CD36//CYP27A1//DBI//FABP4//FABP6//FABP7//GK//SLC27A2//SORBS1
54	hsa05134	Legionellosis - Homo sapiens (human)	0.0285622	9	1.54421	CASP1//CASP8//CXCL2//HSPA6//IL12B//IL1B//NAIP//TLR2//TLR4
55	hsa04623	Cytosolic DNA-sensing pathway - Homo sapiens (human)	0.0290034	10	1.53755	AIM2//CASP1//CCL4//CCL4L1//CXCL10//IL1B//IL33//MB21D1//TREX1//ZBP1
56	hsa04912	GnRH signaling pathway - Homo sapiens (human)	0.0299288	13	1.52391	CACNA1C//CACNA1F//CALML3//CALML5//CAMK2B//ITPR1//KRAS//MAPK13//MAPK8//MMP2//PLCB4//PRKACG//PRKCB
57	hsa05133	Pertussis - Homo sapiens (human)	0.0344715	11	1.46254	CALML3//CALML5//CASP1//IL12B//IL1B//LY96//MAPK13//MAPK8//NLRP3//NOS2//TLR4
58	hsa04911	Insulin secretion - Homo sapiens (human)	0.0424464	12	1.37216	CACNA1C//CACNA1F//CAMK2B//CREB3L3//FXYD2//KCNMB2//KCNMB3//KCNN1//PLCB4//PRKACG//PRKCB//TRPM4
59	hsa04972	Pancreatic secretion - Homo sapiens (human)	0.0467279	13	1.33042	AMY2A//ATP2A3//CD38//CLCA1//CPA3//FXYD2//ITPR1//PLA2G10//PLA2G2A//PLCB4//PRKCB//RAB27B//RAP1B
60	hsa04612	Antigen processing and presentation - Homo sapiens (human)	0.0478425	11	1.32019	CD8B//CTSS//HLA-B//HLA-DMB//HLA-DOB//HLA-DQA1//HLA-DRA//HLA-DRB4//HLA-G//HSPA6//KLRC1
61	hsa04540	Gap junction - Homo sapiens (human)	0.0492343	12	1.30773	ADRB1//CDK1//GUCY1A3//ITPR1//KRAS//PDGFA//PLCB4//PRKACG//PRKCB//TUBA1A//TUBB1//TUBB8
62	hsa04664	Fc epsilon RI signaling pathway - Homo sapiens (human)	0.04971	10	1.30356	BTK//CSF2//FCER1G//KRAS//LYN//MAPK13//MAPK8//PIK3CG//PRKCB//VAV1
