# Supplementary material for: LncRNA and mRNA expression profiles reveal the potential roles of lncRNA contributing to regulating dural penetration in clival chordoma
Source: Aging (Albany NY). 2020 Jun 13;12(11):10809–26. doi: 10.18632/aging.103294 (PMC7346080; doi:10.18632/aging.103294)
Supplement: Supplementary Table 6 [file aging-12-103294-s006..xls]

## Sheet: No-DP vs_Serious-DP
Table S6 LincRNA associated coding genes
Seqname	Gene Symbol	P-value LncRNAs	Fold change LncRNAs	Regulation LncRNAs	Source	RNA length	Chrom	Strand	txStart	txEnd	Genome Relationship	Nearby Gene	NearbyGene Symbol	NearbyProtein Name	P-value mRNAs	Fold change mRNAs	Regulation mRNAs	NearbyGene Chrom	NearbyGene Strand	NearbyGene txStart	NearbyGene txEnd
TCONS_00000859	XLOC_000082	8.1288e-05	6.65571	up	LincRNAs identified by Cabili et al	1245	chr1	+	20527033	20529294	downstream	NM_018584	CAMK2N1	calcium/calmodulin-dependent protein kinase II inhibitor 1	2.48735e-06	12.1912	down	chr1	-	20808883	20812728
TCONS_00000859	XLOC_000082	8.1288e-05	6.65571	up	LincRNAs identified by Cabili et al	1245	chr1	+	20527033	20529294	downstream	NM_024544	MUL1	mitochondrial ubiquitin ligase activator of NFKB 1	0.0242449	2.67127	down	chr1	-	20825940	20834674
TCONS_00000859	XLOC_000082	2.35084e-06	6.65571	up	LincRNAs identified by Cabili et al	1245	chr1	+	20527033	20529294	upstream	NM_001161728	PLA2G2A	phospholipase A2, membrane associated precursor	0.000627806	3.04862	up	chr1	-	20301923	20306932
TCONS_00000959	XLOC_000218	0.0157372	4.49484	up	LincRNAs identified by Cabili et al	297	chr1	+	59180599	59181440	upstream	NM_002353	TACSTD2	tumor-associated calcium signal transducer 2 precursor	9.60639e-05	17.2266	up	chr1	-	59041094	59043166
TCONS_00001018	XLOC_000283	0.0157372	3.9731	up	LincRNAs identified by Cabili et al	896	chr1	+	89510012	89512879	downstream	ENST00000294671	GBP7	guanylate binding protein 7 [Source:HGNC Symbol;Acc:29606]	0.00190646	3.01111	up	chr1	-	89597433	89641723
TCONS_00001018	XLOC_000283	0.0157372	3.9731	up	LincRNAs identified by Cabili et al	896	chr1	+	89510012	89512879	downstream	NM_004120	GBP2	interferon-induced guanylate-binding protein 2	0.00285924	2.19327	up	chr1	-	89573309	89591799
TCONS_00001018	XLOC_000283	0.0157372	3.9731	up	LincRNAs identified by Cabili et al	896	chr1	+	89510012	89512879	downstream	NM_052941	GBP4	guanylate-binding protein 4	0.00480328	2.6043	up	chr1	-	89646830	89664633
TCONS_00001018	XLOC_000283	0.00405966	3.9731	up	LincRNAs identified by Cabili et al	896	chr1	+	89510012	89512879	downstream	NM_052942	GBP5	guanylate-binding protein 5	0.0320076	4.3152	up	chr1	-	89724633	89738544
TCONS_00001093	XLOC_000340	0.00405966	9.85523	up	LincRNAs identified by Cabili et al	216	chr1	+	110626115	110627730	downstream	ENST00000334179	UBL4B	ubiquitin-like 4B [Source:HGNC Symbol;Acc:32309]	0.0326255	6.35879	up	chr1	+	110655061	110656569
TCONS_00001093	XLOC_000340	0.00279213	9.85523	up	LincRNAs identified by Cabili et al	216	chr1	+	110626115	110627730	downstream	NM_022768	RBM15	putative RNA-binding protein 15 isoform 1	3.02564e-06	2.02881	down	chr1	+	110881944	110889303
TCONS_00001103	XLOC_000346	0.00279213	5.19584	up	LincRNAs identified by Cabili et al	406	chr1	+	112549542	112550756	upstream	NM_004980	KCND3	potassium voltage-gated channel subfamily D member 3 isoform 1 precursor	0.000272408	3.93734	down	chr1	-	112318453	112531777
TCONS_00001103	XLOC_000346	1.19701e-05	5.19584	up	LincRNAs identified by Cabili et al	406	chr1	+	112549542	112550756	upstream	NM_172198	KCND3	potassium voltage-gated channel subfamily D member 3 isoform 2 precursor	7.01128e-05	3.91258	down	chr1	-	112318453	112531777
TCONS_00001172	XLOC_000424	0.00490719	11.4993	down	LincRNAs identified by Cabili et al	1203	chr1	+	156481486	156483108	downstream	NM_001161441	SH2D2A	SH2 domain-containing protein 2A isoform 1	0.0108267	2.17821	up	chr1	-	156776034	156786640
TCONS_00001337	XLOC_000633	0.00490719	3.2313	down	LincRNAs identified by Cabili et al	1130	chr1	+	237076594	237085551	upstream	NM_000254	MTR	methionine synthase	3.32767e-05	2.05666	down	chr1	+	236958580	237067281
TCONS_00001337	XLOC_000633	0.000137454	3.2313	down	LincRNAs identified by Cabili et al	1130	chr1	+	237076594	237085551	upstream	NM_001103	ACTN2	alpha-actinin-2	0.0185434	4.05417	up	chr1	+	236849769	236927558
TCONS_00001553	XLOC_000895	0.000137454	7.80065	up	LincRNAs identified by Cabili et al	979	chr1	-	85079754	85086673	upstream	NM_001166294	SSX2IP	afadin- and alpha-actinin-binding protein isoform 2	4.19886e-08	4.57696	down	chr1	-	85109389	85156240
TCONS_00001553	XLOC_000895	0.000382085	7.80065	up	LincRNAs identified by Cabili et al	979	chr1	-	85079754	85086673	upstream	NM_001166417	SSX2IP	afadin- and alpha-actinin-binding protein isoform 1	1.08045e-06	4.69259	down	chr1	-	85109389	85156151
TCONS_00001640	XLOC_000978	0.000382085	3.24239	up	LincRNAs identified by Cabili et al	1171	chr1	-	117338493	117349012	downstream	NM_001144822	CD58	lymphocyte function-associated antigen 3 isoform 2	0.000169333	2.16903	up	chr1	-	117061321	117113715
TCONS_00001640	XLOC_000978	0.00241109	3.24239	up	LincRNAs identified by Cabili et al	1171	chr1	-	117338493	117349012	downstream	NM_001767	CD2	T-cell surface antigen CD2 precursor	0.00901074	4.21197	up	chr1	+	117297085	117311851
TCONS_00001745	XLOC_001120	6.66573e-05	2.18565	up	LincRNAs identified by Cabili et al	262	chr1	-	183118843	183119157	downstream	NM_030933	SHCBP1L	SHC SH2 domain-binding protein 1-like protein	3.00924e-08	10.9676	down	chr1	-	182868999	182922553
TCONS_00001811	XLOC_001195	0.00814627	3.12644	up	LincRNAs identified by Cabili et al	972	chr1	-	212804779	212811198	upstream	NM_018664	BATF3	basic leucine zipper transcriptional factor ATF-like 3	0.0388331	2.17373	up	chr1	-	212859758	212873327
TCONS_00001924	XLOC_000027	2.2092e-09	3.19694	up	LincRNAs identified by Cabili et al	686	chr1	+	2730631	2734321	upstream	NM_152371	FAM213B	prostamide/prostaglandin F synthase isoform b	2.08328e-05	2.04887	up	chr1	+	2518188	2522908
TCONS_00002182	XLOC_000424	0.000451558	13.4864	down	LincRNAs identified by Cabili et al	213	chr1	+	156481505	156481844	downstream	NM_001161441	SH2D2A	SH2 domain-containing protein 2A isoform 1	0.0108267	2.17821	up	chr1	-	156776034	156786640
TCONS_00002269	XLOC_000633	0.000451558	2.47504	down	LincRNAs identified by Cabili et al	481	chr1	+	237070343	237080231	upstream	NM_000254	MTR	methionine synthase	3.32767e-05	2.05666	down	chr1	+	236958580	237067281
TCONS_00002269	XLOC_000633	0.00337172	2.47504	down	LincRNAs identified by Cabili et al	481	chr1	+	237070343	237080231	upstream	NM_001103	ACTN2	alpha-actinin-2	0.0185434	4.05417	up	chr1	+	236849769	236927558
TCONS_00002272	XLOC_000647	0.0265022	3.25052	down	LincRNAs identified by Cabili et al	1073	chr1	+	247496211	247556671	downstream	NM_183395	NLRP3	NACHT, LRR and PYD domains-containing protein 3 isoform b	0.0490071	2.13762	up	chr1	+	247581350	247612406
TCONS_00002400	XLOC_000895	0.0265022	5.22474	up	LincRNAs identified by Cabili et al	806	chr1	-	85079754	85086497	upstream	NM_001166294	SSX2IP	afadin- and alpha-actinin-binding protein isoform 2	4.19886e-08	4.57696	down	chr1	-	85109389	85156240
TCONS_00002400	XLOC_000895	0.000435747	5.22474	up	LincRNAs identified by Cabili et al	806	chr1	-	85079754	85086497	upstream	NM_001166417	SSX2IP	afadin- and alpha-actinin-binding protein isoform 1	1.08045e-06	4.69259	down	chr1	-	85109389	85156151
TCONS_00002935	XLOC_001532	0.000435747	2.49998	up	LincRNAs identified by Cabili et al	2915	chr2	+	74378364	74381319	downstream	NM_001015055	RTKN	rhotekin isoform a	0.0121812	2.70058	down	chr2	-	74652987	74669060
TCONS_00002935	XLOC_001532	0.000435747	2.49998	up	LincRNAs identified by Cabili et al	2915	chr2	+	74378364	74381319	downstream	NM_001015056	RTKN	rhotekin isoform c	0.00224535	3.33584	down	chr2	-	74652987	74667710
TCONS_00002935	XLOC_001532	0.000435747	2.49998	up	LincRNAs identified by Cabili et al	2915	chr2	+	74378364	74381319	downstream	NM_018221	MOB1A	MOB kinase activator 1A	0.000143198	2.92756	up	chr2	-	74383210	74405995
TCONS_00002935	XLOC_001532	0.000435747	2.49998	up	LincRNAs identified by Cabili et al	2915	chr2	+	74378364	74381319	downstream	NM_023019	DCTN1	dynactin subunit 1 isoform 2	0.0311697	2.10928	down	chr2	-	74588280	74601862
TCONS_00002935	XLOC_001532	0.000435747	2.49998	up	LincRNAs identified by Cabili et al	2915	chr2	+	74378364	74381319	downstream	NM_032118	WDR54	WD repeat-containing protein 54	0.00101758	4.15309	up	chr2	+	74648884	74652882
TCONS_00002935	XLOC_001532	0.00451687	2.49998	up	LincRNAs identified by Cabili et al	2915	chr2	+	74378364	74381319	downstream	NM_033046	RTKN	rhotekin isoform b	2.57105e-06	2.12813	down	chr2	-	74652987	74667710
TCONS_00003100	XLOC_001848	0.00451687	2.13647	down	LincRNAs identified by Cabili et al	503	chr2	+	216395169	216410249	upstream	NM_002026	FN1	fibronectin isoform 3 preproprotein	0.00175937	7.4128	down	chr2	-	216225178	216300791
TCONS_00003100	XLOC_001848	0.00451687	2.13647	down	LincRNAs identified by Cabili et al	503	chr2	+	216395169	216410249	upstream	NM_054034	FN1	fibronectin isoform 7 preproprotein	0.00160907	12.5009	down	chr2	-	216279383	216300791
TCONS_00003100	XLOC_001848	0.00451687	2.13647	down	LincRNAs identified by Cabili et al	503	chr2	+	216395169	216410249	upstream	NM_212474	FN1	fibronectin isoform 6 preproprotein	0.00206313	6.20391	down	chr2	-	216225178	216300791
TCONS_00003100	XLOC_001848	0.00451687	2.13647	down	LincRNAs identified by Cabili et al	503	chr2	+	216395169	216410249	upstream	NM_212476	FN1	fibronectin isoform 5 preproprotein	0.00102064	7.85631	down	chr2	-	216225178	216300791
TCONS_00003100	XLOC_001848	0.00451687	2.13647	down	LincRNAs identified by Cabili et al	503	chr2	+	216395169	216410249	upstream	NM_212478	FN1	fibronectin isoform 4 preproprotein	0.00333813	4.98508	down	chr2	-	216225178	216300791
TCONS_00003100	XLOC_001848	0.000223653	2.13647	down	LincRNAs identified by Cabili et al	503	chr2	+	216395169	216410249	upstream	NM_212482	FN1	fibronectin isoform 1 preproprotein	2.23675e-06	15.7644	down	chr2	-	216225178	216300791
TCONS_00003561	XLOC_001338	0.0121007	4.60791	down	LincRNAs identified by Cabili et al	454	chr2	+	9705798	9713199	upstream	NM_003887	ASAP2	arf-GAP with SH3 domain, ANK repeat and PH domain-containing protein 2 isoform a	5.92759e-05	4.1454	down	chr2	+	9346893	9545812
TCONS_00003574	XLOC_001349	0.00335821	2.00023	down	LincRNAs identified by Cabili et al	831	chr2	+	11485210	11489408	upstream	NM_004850	ROCK2	rho-associated protein kinase 2	2.97919e-07	3.00305	down	chr2	-	11321777	11484711
TCONS_00003714	XLOC_001500	0.0205007	5.25441	up	LincRNAs identified by Cabili et al	942	chr2	+	65257878	65278178	downstream	NM_181784	SPRED2	sprouty-related, EVH1 domain-containing protein 2 isoform a	4.72498e-06	2.02197	down	chr2	-	65537984	65659656
TCONS_00003800	XLOC_001595	0.00532215	5.29461	up	LincRNAs identified by Cabili et al	357	chr2	+	102604420	102605462	downstream	NM_004633	IL1R2	interleukin-1 receptor type 2 isoform 1 precursor	0.00511462	3.34584	up	chr2	+	102608305	102644884
TCONS_00003999	XLOC_001823	0.00532215	2.01718	down	LincRNAs identified by Cabili et al	872	chr2	+	207744146	207791610	downstream	NM_003709	KLF7	Krueppel-like factor 7	1.0762e-05	2.43436	down	chr2	-	207945528	208030614
TCONS_00003999	XLOC_001823	0.00532215	2.01718	down	LincRNAs identified by Cabili et al	872	chr2	+	207744146	207791610	upstream	NM_001039845	MDH1B	putative malate dehydrogenase 1B	0.0013026	5.02141	up	chr2	-	207602488	207630050
TCONS_00003999	XLOC_001823	0.000128395	2.01718	down	LincRNAs identified by Cabili et al	872	chr2	+	207744146	207791610	upstream	NM_003812	ADAM23	disintegrin and metalloproteinase domain-containing protein 23 preproprotein	5.95604e-07	5.28665	down	chr2	+	207308367	207482679
TCONS_00004031	XLOC_001869	0.0267188	5.84132	up	LincRNAs identified by Cabili et al	213	chr2	+	220603492	220607703	upstream	NM_002191	INHA	inhibin alpha chain preproprotein	0.00266569	2.60524	down	chr2	+	220436953	220440435
TCONS_00004060	XLOC_001908	0.0267188	3.60702	up	LincRNAs identified by Cabili et al	303	chr2	+	238121307	238121926	downstream	ENST00000353578	COL6A3	collagen, type VI, alpha 3 [Source:HGNC Symbol;Acc:2213]	0.00163677	2.86581	down	chr2	-	238232654	238322850
TCONS_00004060	XLOC_001908	0.0267188	3.60702	up	LincRNAs identified by Cabili et al	303	chr2	+	238121307	238121926	downstream	ENST00000392003	COL6A3	collagen, type VI, alpha 3 [Source:HGNC Symbol;Acc:2213]	1.35006e-06	5.5192	down	chr2	-	238280259	238322850
TCONS_00004060	XLOC_001908	0.0267188	3.60702	up	LincRNAs identified by Cabili et al	303	chr2	+	238121307	238121926	downstream	NM_004369	COL6A3	collagen alpha-3(VI) chain isoform 1 precursor	5.41788e-07	4.52795	down	chr2	-	238232654	238322850
TCONS_00004060	XLOC_001908	0.0267188	3.60702	up	LincRNAs identified by Cabili et al	303	chr2	+	238121307	238121926	downstream	NM_057165	COL6A3	collagen alpha-3(VI) chain isoform 3 precursor	6.37458e-06	4.6137	down	chr2	-	238280259	238322850
TCONS_00004060	XLOC_001908	0.0267188	3.60702	up	LincRNAs identified by Cabili et al	303	chr2	+	238121307	238121926	downstream	NM_057166	COL6A3	collagen alpha-3(VI) chain isoform 4 precursor	1.0915e-05	4.11105	down	chr2	-	238232654	238322850
TCONS_00004060	XLOC_001908	0.00102543	3.60702	up	LincRNAs identified by Cabili et al	303	chr2	+	238121307	238121926	upstream	NM_006710	COPS8	COP9 signalosome complex subunit 8 isoform 1	0.0405321	2.31322	down	chr2	+	237994083	238007489
TCONS_00004137	XLOC_001980	0.0034296	4.1621	down	LincRNAs identified by Cabili et al	1213	chr2	-	9344858	9346352	upstream	NM_003887	ASAP2	arf-GAP with SH3 domain, ANK repeat and PH domain-containing protein 2 isoform a	5.92759e-05	4.1454	down	chr2	+	9346893	9545812
TCONS_00004224	XLOC_002066	2.20123e-06	2.4584	down	LincRNAs identified by Cabili et al	1304	chr2	-	43032191	43038968	downstream	NM_012205	HAAO	3-hydroxyanthranilate 3,4-dioxygenase	1.69914e-05	2.22411	down	chr2	-	42994228	43019751
TCONS_00004289	XLOC_002133	0.0392345	2.04673	up	LincRNAs identified by Cabili et al	360	chr2	-	65282663	65283317	upstream	NM_181784	SPRED2	sprouty-related, EVH1 domain-containing protein 2 isoform a	4.72498e-06	2.02197	down	chr2	-	65537984	65659656
TCONS_00004303	XLOC_002153	0.00367028	2.31951	up	LincRNAs identified by Cabili et al	272	chr2	-	71063564	71088005	downstream	ENST00000295400	TGFA	transforming growth factor, alpha [Source:HGNC Symbol;Acc:11765]	0.00528375	4.27933	down	chr2	-	70674411	70781147
TCONS_00004618	XLOC_002527	0.00367028	2.1201	up	LincRNAs identified by Cabili et al	459	chr2	-	238037369	238039886	downstream	NM_006710	COPS8	COP9 signalosome complex subunit 8 isoform 1	0.0405321	2.31322	down	chr2	+	237994083	238007489
TCONS_00004618	XLOC_002527	0.00367028	2.1201	up	LincRNAs identified by Cabili et al	459	chr2	-	238037369	238039886	upstream	ENST00000353578	COL6A3	collagen, type VI, alpha 3 [Source:HGNC Symbol;Acc:2213]	0.00163677	2.86581	down	chr2	-	238232654	238322850
TCONS_00004618	XLOC_002527	0.00367028	2.1201	up	LincRNAs identified by Cabili et al	459	chr2	-	238037369	238039886	upstream	ENST00000392003	COL6A3	collagen, type VI, alpha 3 [Source:HGNC Symbol;Acc:2213]	1.35006e-06	5.5192	down	chr2	-	238280259	238322850
TCONS_00004618	XLOC_002527	0.00367028	2.1201	up	LincRNAs identified by Cabili et al	459	chr2	-	238037369	238039886	upstream	NM_004369	COL6A3	collagen alpha-3(VI) chain isoform 1 precursor	5.41788e-07	4.52795	down	chr2	-	238232654	238322850
TCONS_00004618	XLOC_002527	0.00367028	2.1201	up	LincRNAs identified by Cabili et al	459	chr2	-	238037369	238039886	upstream	NM_057165	COL6A3	collagen alpha-3(VI) chain isoform 3 precursor	6.37458e-06	4.6137	down	chr2	-	238280259	238322850
TCONS_00004618	XLOC_002527	0.000200835	2.1201	up	LincRNAs identified by Cabili et al	459	chr2	-	238037369	238039886	upstream	NM_057166	COL6A3	collagen alpha-3(VI) chain isoform 4 precursor	1.0915e-05	4.11105	down	chr2	-	238232654	238322850
TCONS_00004691	XLOC_001338	0.000667605	5.40625	down	LincRNAs identified by Cabili et al	291	chr2	+	9708628	9712850	upstream	NM_003887	ASAP2	arf-GAP with SH3 domain, ANK repeat and PH domain-containing protein 2 isoform a	5.92759e-05	4.1454	down	chr2	+	9346893	9545812
TCONS_00004742	XLOC_001415	6.81016e-06	5.06337	down	LincRNAs identified by Cabili et al	1593	chr2	+	31494728	31496423	downstream	NM_000348	SRD5A2	3-oxo-5-alpha-steroid 4-dehydrogenase 2	4.43644e-06	5.91537	up	chr2	-	31749655	31806040
TCONS_00004873	XLOC_001628	6.81016e-06	2.62686	up	LincRNAs identified by Cabili et al	243	chr2	+	113436308	113437490	downstream	NM_000576	IL1B	interleukin-1 beta proprotein	0.000569829	12.6994	up	chr2	-	113587336	113594356
TCONS_00004873	XLOC_001628	0.000510778	2.62686	up	LincRNAs identified by Cabili et al	243	chr2	+	113436308	113437490	upstream	NM_005415	SLC20A1	sodium-dependent phosphate transporter 1	0.000466716	3.9542	down	chr2	+	113403433	113421400
TCONS_00004889	XLOC_001676	0.000510778	4.09665	up	LincRNAs identified by Cabili et al	598	chr2	+	132301071	132302891	downstream	ENST00000303798	C2orf27B	chromosome 2 open reading frame 27B [Source:HGNC Symbol;Acc:33824]	0.00152449	2.02836	down	chr2	-	132552533	132559234
TCONS_00004889	XLOC_001676	7.84871e-06	4.09665	up	LincRNAs identified by Cabili et al	598	chr2	+	132301071	132302891	upstream	NM_138770	CCDC74A	coiled-coil domain-containing protein 74A isoform 1	0.00386755	2.68323	up	chr2	+	132285406	132291239
TCONS_00005041	XLOC_001916	0.00676977	5.55514	down	LincRNAs identified by Cabili et al	406	chr2	+	239463184	239468090	upstream	NM_001040445	ASB1	ankyrin repeat and SOCS box protein 1	3.36786e-06	2.23454	down	chr2	+	239335625	239360891
TCONS_00005211	XLOC_002221	0.00676977	2.49527	up	LincRNAs identified by Cabili et al	210	chr2	-	99388254	99388552	downstream	ENST00000393487	MGAT4A	mannosyl (alpha-1,3-)-glycoprotein beta-1,4-N-acetylglucosaminyltransferase, isozyme A [Source:HGNC Symbol;Acc:7047]	3.46544e-06	2.5607	up	chr2	-	99235568	99347589
TCONS_00005211	XLOC_002221	0.00676977	2.49527	up	LincRNAs identified by Cabili et al	210	chr2	-	99388254	99388552	upstream	NM_025244	TSGA10	testis-specific gene 10 protein	0.000306343	13.1993	up	chr2	-	99613723	99771187
TCONS_00005211	XLOC_002221	4.42174e-05	2.49527	up	LincRNAs identified by Cabili et al	210	chr2	-	99388254	99388552	upstream	NM_207362	KIAA1211L	uncharacterized protein C2orf55	0.000409188	6.5769	up	chr2	-	99410308	99552684
TCONS_00005268	XLOC_002383	0.00696166	4.77341	down	LincRNAs identified by Cabili et al	312	chr2	-	169197716	169198115	upstream	NM_203463	CERS6	ceramide synthase 6 isoform 2	1.16429e-05	4.56792	down	chr2	+	169312758	169631644
TCONS_00005969	XLOC_002602	0.000322774	3.62283	up	LincRNAs identified by Cabili et al	997	chr3	+	27753780	27755870	downstream	NM_005442	EOMES	eomesodermin homolog	0.000120375	3.51638	up	chr3	-	27757885	27763785
TCONS_00006034	XLOC_002675	0.000322774	2.10468	down	LincRNAs identified by Cabili et al	309	chr3	+	58419677	58468999	downstream	NM_003500	ACOX2	peroxisomal acyl-coenzyme A oxidase 2	0.00579411	2.33263	down	chr3	-	58490862	58522929
TCONS_00006034	XLOC_002675	0.000322774	2.10468	down	LincRNAs identified by Cabili et al	309	chr3	+	58419677	58468999	downstream	NM_138805	FAM3D	protein FAM3D precursor	0.00348676	34.1502	up	chr3	-	58619669	58652561
TCONS_00006034	XLOC_002675	0.000322774	2.10468	down	LincRNAs identified by Cabili et al	309	chr3	+	58419677	58468999	upstream	ENST00000295962	ABHD6	abhydrolase domain containing 6 [Source:HGNC Symbol;Acc:21398]	0.00028288	2.21065	down	chr3	+	58223258	58280461
TCONS_00006034	XLOC_002675	0.000322774	2.10468	down	LincRNAs identified by Cabili et al	309	chr3	+	58419677	58468999	upstream	NM_001164317	FLNB	filamin-B isoform 1	2.8463e-09	3.39481	down	chr3	+	57994126	58157982
TCONS_00006034	XLOC_002675	0.000322774	2.10468	down	LincRNAs identified by Cabili et al	309	chr3	+	58419677	58468999	upstream	NM_001164318	FLNB	filamin-B isoform 3	6.12601e-07	5.91427	down	chr3	+	57994126	58157982
TCONS_00006034	XLOC_002675	0.000322774	2.10468	down	LincRNAs identified by Cabili et al	309	chr3	+	58419677	58468999	upstream	NM_001164319	FLNB	filamin-B isoform 4	7.15814e-08	5.73445	down	chr3	+	57994126	58157982
TCONS_00006034	XLOC_002675	0.000322774	2.10468	down	LincRNAs identified by Cabili et al	309	chr3	+	58419677	58468999	upstream	NM_001457	FLNB	filamin-B isoform 2	4.14e-11	3.28798	down	chr3	+	57994126	58157982
TCONS_00006034	XLOC_002675	0.014944	2.10468	down	LincRNAs identified by Cabili et al	309	chr3	+	58419677	58468999	upstream	NM_004944	DNASE1L3	deoxyribonuclease gamma isoform 1 precursor	0.000821602	3.58205	up	chr3	-	58178352	58196730
TCONS_00006092	XLOC_002701	9.9e-11	2.95617	up	LincRNAs identified by Cabili et al	466	chr3	+	71835019	71835668	upstream	NM_001012505	FOXP1	forkhead box protein P1 isoform 2	7.92762e-05	3.29868	up	chr3	-	71247033	71633140
TCONS_00006131	XLOC_002733	9.9e-11	17.1286	down	LincRNAs identified by Cabili et al	1123	chr3	+	97910048	97915894	downstream	NM_001005479	OR5H6	olfactory receptor 5H6	1e-13	64.989	down	chr3	+	97983128	97984106
TCONS_00006131	XLOC_002733	2.47878e-08	17.1286	down	LincRNAs identified by Cabili et al	1123	chr3	+	97910048	97915894	upstream	NM_001005514	OR5H14	olfactory receptor 5H14	0.000568968	2.73251	down	chr3	+	97868229	97869162
TCONS_00006132	XLOC_002733	2.47878e-08	13.6706	down	LincRNAs identified by Cabili et al	1126	chr3	+	97910048	97915894	downstream	NM_001005479	OR5H6	olfactory receptor 5H6	1e-13	64.989	down	chr3	+	97983128	97984106
TCONS_00006132	XLOC_002733	5.16271e-07	13.6706	down	LincRNAs identified by Cabili et al	1126	chr3	+	97910048	97915894	upstream	NM_001005514	OR5H14	olfactory receptor 5H14	0.000568968	2.73251	down	chr3	+	97868229	97869162
TCONS_00006196	XLOC_002793	4.02827e-05	3.5904	down	LincRNAs identified by Cabili et al	355	chr3	+	125485333	125505694	downstream	NM_001015050	ALG1L	putative glycosyltransferase ALG1-like isoform 2	0.0104185	2.03063	up	chr3	-	125648117	125655887
TCONS_00006387	XLOC_003006	4.02827e-05	5.10137	up	LincRNAs identified by Cabili et al	609	chr3	+	196326510	196327216	upstream	NM_001105573	FBXO45	F-box/SPRY domain-containing protein 1	0.033534	2.47081	down	chr3	+	196295724	196315930
TCONS_00006387	XLOC_003006	4.74303e-07	5.10137	up	LincRNAs identified by Cabili et al	609	chr3	+	196326510	196327216	upstream	NM_152773	TCTEX1D2	tctex1 domain-containing protein 2	0.000345328	2.23773	up	chr3	-	196018089	196045165
TCONS_00006505	XLOC_003111	4.74303e-07	5.31636	down	LincRNAs identified by Cabili et al	1171	chr3	-	46876674	46888307	downstream	NM_001205271	PRSS46	putative serine protease 46	0.00242409	3.0314	down	chr3	-	46761072	46777921
TCONS_00006505	XLOC_003111	4.74303e-07	5.31636	down	LincRNAs identified by Cabili et al	1171	chr3	-	46876674	46888307	downstream	NM_024512	LRRC2	leucine-rich repeat-containing protein 2	0.00408657	2.62963	up	chr3	-	46556877	46608040
TCONS_00006505	XLOC_003111	4.74303e-07	5.31636	down	LincRNAs identified by Cabili et al	1171	chr3	-	46876674	46888307	downstream	NM_147196	TMIE	transmembrane inner ear expressed protein precursor	7.01904e-05	2.58446	down	chr3	+	46742822	46752413
TCONS_00006505	XLOC_003111	0.000238844	5.31636	down	LincRNAs identified by Cabili et al	1171	chr3	-	46876674	46888307	upstream	NM_000258	MYL3	myosin light chain 3	0.000254154	2.01352	down	chr3	-	46899356	46904973
TCONS_00006528	XLOC_003153	0.0171072	2.45545	down	LincRNAs identified by Cabili et al	553	chr3	-	67291604	67292386	upstream	NM_001177599	SUCLG2	succinyl-CoA ligase [GDP-forming] subunit beta, mitochondrial isoform 1 precursor	0.0114893	2.73391	down	chr3	-	67410883	67705038
TCONS_00006601	XLOC_003209	0.00492059	2.27866	up	LincRNAs identified by Cabili et al	4004	chr3	-	107732833	107757940	upstream	NM_007072	HHLA2	HERV-H LTR-associating protein 2 precursor	0.00446172	2.32249	down	chr3	+	108021331	108097126
TCONS_00006668	XLOC_003264	0.00492059	2.95747	down	LincRNAs identified by Cabili et al	811	chr3	-	135551401	135559458	upstream	NM_001190447	PPP2R3A	serine/threonine-protein phosphatase 2A regulatory subunit B'' subunit alpha isoform 3	1.25543e-06	2.43229	down	chr3	+	135684514	135866752
TCONS_00006668	XLOC_003264	4.08359e-08	2.95747	down	LincRNAs identified by Cabili et al	811	chr3	-	135551401	135559458	upstream	NM_002718	PPP2R3A	serine/threonine-protein phosphatase 2A regulatory subunit B'' subunit alpha isoform 1	0.000150827	2.48998	down	chr3	+	135684514	135866752
TCONS_00007884	XLOC_004128	1.54506e-05	6.70446	down	LincRNAs identified by Cabili et al	571	chr4	-	153662549	153667773	upstream	ENST00000260008	FHDC1	FH2 domain containing 1 [Source:HGNC Symbol;Acc:29363]	8.3518e-09	7.12115	down	chr4	+	153864134	153900848
TCONS_00007951	XLOC_003416	1.54506e-05	5.45639	down	LincRNAs identified by Cabili et al	1706	chr4	+	1000613	1002952	downstream	NM_001193318	RNF212	RING finger protein 212 isoform c	0.000937325	2.7772	up	chr4	-	1087095	1107352
TCONS_00007951	XLOC_003416	7.83654e-05	5.45639	down	LincRNAs identified by Cabili et al	1706	chr4	+	1000613	1002952	upstream	NM_000203	IDUA	alpha-L-iduronidase precursor	7.34358e-05	2.91026	down	chr4	+	980784	998317
TCONS_00008143	XLOC_003595	7.83654e-05	7.98029	up	LincRNAs identified by Cabili et al	245	chr4	+	84009929	84010241	downstream	NM_001098540	HPSE	heparanase isoform 1 preproprotein	0.00519348	4.05348	down	chr4	-	84213613	84256034
TCONS_00008143	XLOC_003595	7.83654e-05	7.98029	up	LincRNAs identified by Cabili et al	245	chr4	+	84009929	84010241	downstream	NM_001166498	HPSE	heparanase isoform 2 preproprotein	1.15499e-05	4.16043	down	chr4	-	84213613	84256306
TCONS_00008143	XLOC_003595	7.83654e-05	7.98029	up	LincRNAs identified by Cabili et al	245	chr4	+	84009929	84010241	upstream	NM_001077206	SEC31A	protein transport protein Sec31A isoform 4	0.00144279	2.38189	down	chr4	-	83739813	83812412
TCONS_00008143	XLOC_003595	7.83654e-05	7.98029	up	LincRNAs identified by Cabili et al	245	chr4	+	84009929	84010241	upstream	NM_001077207	SEC31A	protein transport protein Sec31A isoform 1	0.00184313	2.28046	down	chr4	-	83739813	83812412
TCONS_00008143	XLOC_003595	0.000209585	7.98029	up	LincRNAs identified by Cabili et al	245	chr4	+	84009929	84010241	upstream	NM_001077208	SEC31A	protein transport protein Sec31A isoform 3	0.00600863	2.1633	down	chr4	-	83739813	83812412
TCONS_00008144	XLOC_003595	0.000209585	9.01296	up	LincRNAs identified by Cabili et al	228	chr4	+	84010099	84010394	downstream	NM_001098540	HPSE	heparanase isoform 1 preproprotein	0.00519348	4.05348	down	chr4	-	84213613	84256034
TCONS_00008144	XLOC_003595	0.000209585	9.01296	up	LincRNAs identified by Cabili et al	228	chr4	+	84010099	84010394	downstream	NM_001166498	HPSE	heparanase isoform 2 preproprotein	1.15499e-05	4.16043	down	chr4	-	84213613	84256306
TCONS_00008144	XLOC_003595	0.000209585	9.01296	up	LincRNAs identified by Cabili et al	228	chr4	+	84010099	84010394	upstream	NM_001077206	SEC31A	protein transport protein Sec31A isoform 4	0.00144279	2.38189	down	chr4	-	83739813	83812412
TCONS_00008144	XLOC_003595	0.000209585	9.01296	up	LincRNAs identified by Cabili et al	228	chr4	+	84010099	84010394	upstream	NM_001077207	SEC31A	protein transport protein Sec31A isoform 1	0.00184313	2.28046	down	chr4	-	83739813	83812412
TCONS_00008144	XLOC_003595	0.00902035	9.01296	up	LincRNAs identified by Cabili et al	228	chr4	+	84010099	84010394	upstream	NM_001077208	SEC31A	protein transport protein Sec31A isoform 3	0.00600863	2.1633	down	chr4	-	83739813	83812412
TCONS_00008207	XLOC_003662	0.00902035	2.09377	down	LincRNAs identified by Cabili et al	239	chr4	+	119532090	119539356	downstream	NM_001128933	SYNPO2	synaptopodin-2 isoform b	0.000109964	4.31429	up	chr4	+	119809995	119959669
TCONS_00008207	XLOC_003662	0.0273182	2.09377	down	LincRNAs identified by Cabili et al	239	chr4	+	119532090	119539356	downstream	NM_001128934	SYNPO2	synaptopodin-2 isoform c	0.000197736	5.05537	up	chr4	+	119809995	119959669
TCONS_00008317	XLOC_003772	0.0273182	5.01827	up	LincRNAs identified by Cabili et al	869	chr4	+	170833987	170862789	downstream	NM_021647	MFAP3L	microfibrillar-associated protein 3-like isoform 1 precursor	9.26563e-06	2.59594	down	chr4	-	170907747	170947429
TCONS_00008317	XLOC_003772	0.00617678	5.01827	up	LincRNAs identified by Cabili et al	869	chr4	+	170833987	170862789	upstream	NM_017867	C4orf27	UPF0609 protein C4orf27	0.0326552	2.09572	up	chr4	-	170650618	170679093
TCONS_00008338	XLOC_003787	0.00617678	7.7397	up	LincRNAs identified by Cabili et al	403	chr4	+	175445331	175448018	downstream	NM_001042543	GLRA3	glycine receptor subunit alpha-3 isoform b precursor	1.94e-11	21.8283	down	chr4	-	175563197	175750465
TCONS_00008338	XLOC_003787	0.00617678	7.7397	up	LincRNAs identified by Cabili et al	403	chr4	+	175445331	175448018	downstream	NM_006529	GLRA3	glycine receptor subunit alpha-3 isoform a precursor	0	20.2578	down	chr4	-	175563197	175750465
TCONS_00008338	XLOC_003787	0.00617678	7.7397	up	LincRNAs identified by Cabili et al	403	chr4	+	175445331	175448018	upstream	ENST00000296522	HPGD	hydroxyprostaglandin dehydrogenase 15-(NAD) [Source:HGNC Symbol;Acc:5154]	8.38112e-05	6.19448	up	chr4	-	175411327	175444049
TCONS_00008338	XLOC_003787	0.00617678	7.7397	up	LincRNAs identified by Cabili et al	403	chr4	+	175445331	175448018	upstream	NM_001040157	CEP44	centrosomal protein of 44 kDa isoform a	0.000780854	2.25981	down	chr4	+	175204827	175241482
TCONS_00008338	XLOC_003787	0.0450478	7.7397	up	LincRNAs identified by Cabili et al	403	chr4	+	175445331	175448018	upstream	NM_001145816	HPGD	15-hydroxyprostaglandin dehydrogenase [NAD(+)] isoform 2	5.07802e-06	5.79993	up	chr4	-	175411327	175444049
TCONS_00008419	XLOC_003874	0.0450478	2.12879	down	LincRNAs identified by Cabili et al	1944	chr4	-	8160851	8166042	downstream	NM_001130083	ABLIM2	actin-binding LIM protein 2 isoform 1	3.9837e-05	4.79308	down	chr4	-	7967036	8160559
TCONS_00008419	XLOC_003874	0.0450478	2.12879	down	LincRNAs identified by Cabili et al	1944	chr4	-	8160851	8166042	downstream	NM_001130084	ABLIM2	actin-binding LIM protein 2 isoform 2	0.00103676	2.15895	down	chr4	-	7967036	8160559
TCONS_00008419	XLOC_003874	0.0450478	2.12879	down	LincRNAs identified by Cabili et al	1944	chr4	-	8160851	8166042	downstream	NM_001130087	ABLIM2	actin-binding LIM protein 2 isoform 5	0.0112016	2.0808	down	chr4	-	7967036	8160559
TCONS_00008419	XLOC_003874	0.0450478	2.12879	down	LincRNAs identified by Cabili et al	1944	chr4	-	8160851	8166042	downstream	NM_001130088	ABLIM2	actin-binding LIM protein 2 isoform 7	1.71483e-05	6.19798	down	chr4	-	8008747	8160559
TCONS_00008419	XLOC_003874	0.00207456	2.12879	down	LincRNAs identified by Cabili et al	1944	chr4	-	8160851	8166042	downstream	NM_032432	ABLIM2	actin-binding LIM protein 2 isoform 6	0.0007178	7.19145	down	chr4	-	7967036	8160559
TCONS_00008508	XLOC_003993	0.00291952	2.42485	down	LincRNAs identified by Cabili et al	209	chr4	-	78075945	78077856	downstream	NM_018243	SEPT11	septin-11	2.28372e-06	2.19611	down	chr4	+	77870894	77959768
TCONS_00008643	XLOC_004156	0.000207294	3.31403	up	LincRNAs identified by Cabili et al	613	chr4	-	171196395	171201364	downstream	NM_021647	MFAP3L	microfibrillar-associated protein 3-like isoform 1 precursor	9.26563e-06	2.59594	down	chr4	-	170907747	170947429
TCONS_00008683	XLOC_004199	0.000207294	6.38323	down	LincRNAs identified by Cabili et al	211	chr4	-	184386041	184393909	upstream	NM_001564	ING2	inhibitor of growth protein 2	0.000179184	4.34076	down	chr4	+	184426219	184432249
TCONS_00008683	XLOC_004199	0.000207294	6.38323	down	LincRNAs identified by Cabili et al	211	chr4	-	184386041	184393909	upstream	NM_152682	RWDD4	RWD domain-containing protein 4	0.0114514	3.46878	down	chr4	-	184560788	184580331
TCONS_00008683	XLOC_004199	0.000569442	6.38323	down	LincRNAs identified by Cabili et al	211	chr4	-	184386041	184393909	upstream	NM_199053	TRAPPC11	trafficking protein particle complex subunit 11 isoform b	0.000142066	2.27595	down	chr4	+	184580419	184634747
TCONS_00008692	XLOC_004205	0.000569442	6.41556	up	LincRNAs identified by Cabili et al	640	chr4	-	185299886	185303530	downstream	ENST00000296741	ENPP6	ectonucleotide pyrophosphatase/phosphodiesterase 6 [Source:HGNC Symbol;Acc:23409]	3.62928e-07	19.6789	down	chr4	-	185009858	185139114
TCONS_00008692	XLOC_004205	0.000117737	6.41556	up	LincRNAs identified by Cabili et al	640	chr4	-	185299886	185303530	upstream	NM_152683	CCDC111	coiled-coil domain-containing protein 111	6.40193e-06	2.35405	down	chr4	+	185570766	185616112
TCONS_00008738	XLOC_003422	0.000117737	2.08958	up	LincRNAs identified by Cabili et al	992	chr4	+	1548980	1550300	downstream	NM_001127266	TMEM129	transmembrane protein 129 isoform a precursor	0.00227887	2.81973	down	chr4	-	1717678	1723084
TCONS_00008738	XLOC_003422	1.06675e-05	2.08958	up	LincRNAs identified by Cabili et al	992	chr4	+	1548980	1550300	downstream	NM_138385	TMEM129	transmembrane protein 129 isoform b precursor	0.00526999	3.14624	down	chr4	-	1717678	1723084
TCONS_00008739	XLOC_003422	1.06675e-05	2.06137	up	LincRNAs identified by Cabili et al	734	chr4	+	1549138	1550198	downstream	NM_001127266	TMEM129	transmembrane protein 129 isoform a precursor	0.00227887	2.81973	down	chr4	-	1717678	1723084
TCONS_00008739	XLOC_003422	0.000325109	2.06137	up	LincRNAs identified by Cabili et al	734	chr4	+	1549138	1550198	downstream	NM_138385	TMEM129	transmembrane protein 129 isoform b precursor	0.00526999	3.14624	down	chr4	-	1717678	1723084
TCONS_00008904	XLOC_003734	0.0132349	2.16056	down	LincRNAs identified by Cabili et al	2886	chr4	+	152588606	152591639	upstream	ENST00000435205	FAM160A1	family with sequence similarity 160, member A1 [Source:HGNC Symbol;Acc:34237]	2.70644e-05	4.14629	down	chr4	+	152330397	152584784
TCONS_00008931	XLOC_003775	0.00113785	4.20664	up	LincRNAs identified by Cabili et al	345	chr4	+	171147755	171194975	upstream	NM_021647	MFAP3L	microfibrillar-associated protein 3-like isoform 1 precursor	9.26563e-06	2.59594	down	chr4	-	170907747	170947429
TCONS_00008950	XLOC_003805	0.00114834	3.69382	up	LincRNAs identified by Cabili et al	289	chr4	+	185193149	185195410	upstream	ENST00000296741	ENPP6	ectonucleotide pyrophosphatase/phosphodiesterase 6 [Source:HGNC Symbol;Acc:23409]	3.62928e-07	19.6789	down	chr4	-	185009858	185139114
TCONS_00009189	XLOC_004205	0.00114834	4.73591	up	LincRNAs identified by Cabili et al	700	chr4	-	185289387	185303530	downstream	ENST00000296741	ENPP6	ectonucleotide pyrophosphatase/phosphodiesterase 6 [Source:HGNC Symbol;Acc:23409]	3.62928e-07	19.6789	down	chr4	-	185009858	185139114
TCONS_00009189	XLOC_004205	0.000200473	4.73591	up	LincRNAs identified by Cabili et al	700	chr4	-	185289387	185303530	upstream	NM_152683	CCDC111	coiled-coil domain-containing protein 111	6.40193e-06	2.35405	down	chr4	+	185570766	185616112
TCONS_00009190	XLOC_004205	0.000200473	4.43331	up	LincRNAs identified by Cabili et al	865	chr4	-	185289387	185303530	downstream	ENST00000296741	ENPP6	ectonucleotide pyrophosphatase/phosphodiesterase 6 [Source:HGNC Symbol;Acc:23409]	3.62928e-07	19.6789	down	chr4	-	185009858	185139114
TCONS_00009190	XLOC_004205	0.00787014	4.43331	up	LincRNAs identified by Cabili et al	865	chr4	-	185289387	185303530	upstream	NM_152683	CCDC111	coiled-coil domain-containing protein 111	6.40193e-06	2.35405	down	chr4	+	185570766	185616112
TCONS_00009771	XLOC_004979	2.82717e-07	2.47351	down	LincRNAs identified by Cabili et al	295	chr5	-	123676149	123676863	upstream	NM_020747	ZNF608	zinc finger protein 608	5.18421e-08	4.27909	down	chr5	-	123972609	124080805
TCONS_00009829	XLOC_004243	0.00434342	5.63751	down	LincRNAs identified by Cabili et al	320	chr5	+	1042042	1042914	upstream	NM_033120	NKD2	protein naked cuticle homolog 2	1.16062e-05	4.13405	down	chr5	+	1009167	1038925
TCONS_00009859	XLOC_004271	0.00434342	2.75267	up	LincRNAs identified by Cabili et al	607	chr5	+	6586436	6587959	downstream	ENST00000230859	PAPD7	PAP associated domain containing 7 [Source:HGNC Symbol;Acc:16705]	0.0165628	2.00281	down	chr5	+	6714717	6757161
TCONS_00009859	XLOC_004271	0.000143225	2.75267	up	LincRNAs identified by Cabili et al	607	chr5	+	6586436	6587959	upstream	NM_001145161	UBE2QL1	ubiquitin-conjugating enzyme E2Q-like protein 1	1.10947e-06	5.47789	down	chr5	+	6448735	6496834
TCONS_00010083	XLOC_004540	2.76004e-06	5.47002	up	LincRNAs identified by Cabili et al	344	chr5	+	126565032	126567810	downstream	NM_130809	PRRC1	protein PRRC1	2.96298e-05	2.009	down	chr5	+	126853308	126890780
TCONS_00010227	XLOC_004693	2.76004e-06	14.593	up	LincRNAs identified by Cabili et al	375	chr5	-	553526	554002	downstream	NM_004174	SLC9A3	sodium/hydrogen exchanger 3	0.00474223	3.68917	up	chr5	-	473333	524549
TCONS_00010227	XLOC_004693	3.84878e-05	14.593	up	LincRNAs identified by Cabili et al	375	chr5	-	553526	554002	downstream	NM_138464	C5orf55	uncharacterized protein C5orf55 precursor	9.68007e-05	2.30287	down	chr5	-	441642	443258
TCONS_00010236	XLOC_004700	0.0356983	2.70988	up	LincRNAs identified by Cabili et al	1974	chr5	-	1043115	1045405	downstream	NM_033120	NKD2	protein naked cuticle homolog 2	1.16062e-05	4.13405	down	chr5	+	1009167	1038925
TCONS_00010466	XLOC_004988	1.37165e-07	2.4718	down	LincRNAs identified by Cabili et al	482	chr5	-	126554725	126565501	upstream	NM_130809	PRRC1	protein PRRC1	2.96298e-05	2.009	down	chr5	+	126853308	126890780
TCONS_00010594	XLOC_004244	0.0160528	6.26828	down	LincRNAs identified by Cabili et al	1181	chr5	+	1043538	1045593	upstream	NM_033120	NKD2	protein naked cuticle homolog 2	1.16062e-05	4.13405	down	chr5	+	1009167	1038925
TCONS_00010596	XLOC_004244	1e-13	3.50619	down	LincRNAs identified by Cabili et al	1189	chr5	+	1043854	1046279	upstream	NM_033120	NKD2	protein naked cuticle homolog 2	1.16062e-05	4.13405	down	chr5	+	1009167	1038925
TCONS_00010597	XLOC_004244	6.08e-10	5.34453	down	LincRNAs identified by Cabili et al	1623	chr5	+	1043854	1046915	upstream	NM_033120	NKD2	protein naked cuticle homolog 2	1.16062e-05	4.13405	down	chr5	+	1009167	1038925
TCONS_00010599	XLOC_004244	0.00395962	5.18193	down	LincRNAs identified by Cabili et al	690	chr5	+	1046023	1046915	upstream	NM_033120	NKD2	protein naked cuticle homolog 2	1.16062e-05	4.13405	down	chr5	+	1009167	1038925
TCONS_00010663	XLOC_004339	0.00395962	2.12568	down	LincRNAs identified by Cabili et al	2412	chr5	+	36871456	36876605	downstream	ENST00000425232	C5orf42	chromosome 5 open reading frame 42 [Source:HGNC Symbol;Acc:25801]	4.7749e-05	2.42732	down	chr5	-	37106329	37249530
TCONS_00010663	XLOC_004339	0.044294	2.12568	down	LincRNAs identified by Cabili et al	2412	chr5	+	36871456	36876605	downstream	NM_015384	NIPBL	nipped-B-like protein isoform B	0.00687917	2.36209	up	chr5	+	36876860	37065921
TCONS_00010962	XLOC_004881	7.52867e-06	2.66545	down	LincRNAs identified by Cabili et al	262	chr5	-	72547338	72570767	upstream	NM_004472	FOXD1	forkhead box protein D1	0.00778448	6.87185	down	chr5	-	72742084	72744352
TCONS_00011106	XLOC_005110	0.013045	4.50164	up	LincRNAs identified by Cabili et al	2092	chr5	-	180253879	180258941	downstream	NM_001114617	MGAT1	alpha-1,3-mannosyl-glycoprotein 2-beta-N-acetylglucosaminyltransferase	0.000374255	4.79414	up	chr5	-	180217540	180237137
TCONS_00011631	XLOC_005119	0.000582847	2.0724	down	LincRNAs identified by Cabili et al	739	chr6	+	230931	237179	downstream	NM_002460	IRF4	interferon regulatory factor 4 isoform 1	4.93916e-06	4.63878	up	chr6	+	391738	411443
TCONS_00011743	XLOC_005208	0.000582847	2.06391	down	LincRNAs identified by Cabili et al	4186	chr6	+	25992967	26002137	downstream	ENST00000244601	HIST1H2BG	histone cluster 1, H2bg [Source:HGNC Symbol;Acc:4746]	6.77606e-05	2.39119	up	chr6	-	26216427	26216872
TCONS_00011743	XLOC_005208	0.000582847	2.06391	down	LincRNAs identified by Cabili et al	4186	chr6	+	25992967	26002137	downstream	ENST00000343677	HIST1H1C	histone cluster 1, H1c [Source:HGNC Symbol;Acc:4716]	0.00093163	2.16744	down	chr6	-	26055967	26056699
TCONS_00011743	XLOC_005208	0.000582847	2.06391	down	LincRNAs identified by Cabili et al	4186	chr6	+	25992967	26002137	downstream	ENST00000356350	HIST1H2BH	histone cluster 1, H2bh [Source:HGNC Symbol;Acc:4755]	5.36487e-07	3.9983	up	chr6	+	26251878	26252303
TCONS_00011743	XLOC_005208	0.000582847	2.06391	down	LincRNAs identified by Cabili et al	4186	chr6	+	25992967	26002137	downstream	NM_000410	HFE	hereditary hemochromatosis protein isoform 1 precursor	0.00185802	2.11271	down	chr6	+	26087508	26095469
TCONS_00011743	XLOC_005208	0.000582847	2.06391	down	LincRNAs identified by Cabili et al	4186	chr6	+	25992967	26002137	downstream	NM_138720	HIST1H2BD	histone H2B type 1-D	0.00031696	2.61544	up	chr6	+	26158348	26171576
TCONS_00011743	XLOC_005208	0.0128174	2.06391	down	LincRNAs identified by Cabili et al	4186	chr6	+	25992967	26002137	downstream	NM_139003	HFE	hereditary hemochromatosis protein isoform 3 precursor	0.00357235	2.08856	down	chr6	+	26087508	26095469
TCONS_00011744	XLOC_005209	0.0128174	3.94089	up	LincRNAs identified by Cabili et al	825	chr6	+	26331952	26340507	upstream	ENST00000244601	HIST1H2BG	histone cluster 1, H2bg [Source:HGNC Symbol;Acc:4746]	6.77606e-05	2.39119	up	chr6	-	26216427	26216872
TCONS_00011744	XLOC_005209	0.0128174	3.94089	up	LincRNAs identified by Cabili et al	825	chr6	+	26331952	26340507	upstream	ENST00000343677	HIST1H1C	histone cluster 1, H1c [Source:HGNC Symbol;Acc:4716]	0.00093163	2.16744	down	chr6	-	26055967	26056699
TCONS_00011744	XLOC_005209	0.0128174	3.94089	up	LincRNAs identified by Cabili et al	825	chr6	+	26331952	26340507	upstream	ENST00000356350	HIST1H2BH	histone cluster 1, H2bh [Source:HGNC Symbol;Acc:4755]	5.36487e-07	3.9983	up	chr6	+	26251878	26252303
TCONS_00011744	XLOC_005209	0.0128174	3.94089	up	LincRNAs identified by Cabili et al	825	chr6	+	26331952	26340507	upstream	NM_000410	HFE	hereditary hemochromatosis protein isoform 1 precursor	0.00185802	2.11271	down	chr6	+	26087508	26095469
TCONS_00011744	XLOC_005209	0.0128174	3.94089	up	LincRNAs identified by Cabili et al	825	chr6	+	26331952	26340507	upstream	NM_138720	HIST1H2BD	histone H2B type 1-D	0.00031696	2.61544	up	chr6	+	26158348	26171576
TCONS_00011744	XLOC_005209	0.0200327	3.94089	up	LincRNAs identified by Cabili et al	825	chr6	+	26331952	26340507	upstream	NM_139003	HFE	hereditary hemochromatosis protein isoform 3 precursor	0.00357235	2.08856	down	chr6	+	26087508	26095469
TCONS_00011758	XLOC_005220	0.0200327	2.51935	down	LincRNAs identified by Cabili et al	319	chr6	+	27677988	27680876	downstream	ENST00000244623	OR2B6	olfactory receptor, family 2, subfamily B, member 6 [Source:HGNC Symbol;Acc:8241]	1.25768e-05	2.77659	up	chr6	+	27925018	27925960
TCONS_00011758	XLOC_005220	0.0200327	2.51935	down	LincRNAs identified by Cabili et al	319	chr6	+	27677988	27680876	downstream	ENST00000328488	HIST1H3I	histone cluster 1, H3i [Source:HGNC Symbol;Acc:4771]	0.0043588	2.06065	up	chr6	-	27839622	27840099
TCONS_00011758	XLOC_005220	0.0200327	2.51935	down	LincRNAs identified by Cabili et al	319	chr6	+	27677988	27680876	downstream	ENST00000355981	HIST1H4L	histone cluster 1, H4l [Source:HGNC Symbol;Acc:4791]	0.0103029	3.20876	up	chr6	-	27840925	27841289
TCONS_00011758	XLOC_005220	8.19791e-06	2.51935	down	LincRNAs identified by Cabili et al	319	chr6	+	27677988	27680876	downstream	ENST00000369163	HIST1H3H	histone cluster 1, H3h [Source:HGNC Symbol;Acc:4775]	2.93512e-06	2.04855	up	chr6	+	27777841	27778314
TCONS_00011810	XLOC_005283	8.19791e-06	6.85442	down	LincRNAs identified by Cabili et al	304	chr6	+	39916123	39920971	upstream	NM_015345	DAAM2	disheveled-associated activator of morphogenesis 2 isoform 2	0.0038937	3.20751	down	chr6	+	39760772	39872653
TCONS_00011810	XLOC_005283	5.14336e-05	6.85442	down	LincRNAs identified by Cabili et al	304	chr6	+	39916123	39920971	upstream	NM_145027	KIF6	kinesin-like protein KIF6	0.0053227	8.1761	up	chr6	-	39302875	39693181
TCONS_00011878	XLOC_005369	0.000372897	2.32163	down	LincRNAs identified by Cabili et al	424	chr6	+	83122461	83125545	upstream	NM_001166392	TPBG	trophoblast glycoprotein precursor	4.30349e-05	2.70465	down	chr6	+	83073960	83077133
TCONS_00011978	XLOC_005488	0.0163428	2.47652	down	LincRNAs identified by Cabili et al	376	chr6	+	143703393	143704591	downstream	NM_001100164	PHACTR2	phosphatase and actin regulator 2 isoform 1	0.00303987	2.45276	down	chr6	+	143999101	144152322
TCONS_00012030	XLOC_005561	2.77814e-07	2.65407	up	LincRNAs identified by Cabili et al	438	chr6	+	170462473	170466131	downstream	NM_005618	DLL1	delta-like protein 1 precursor	0.000361426	3.18622	up	chr6	-	170591293	170599697
TCONS_00012039	XLOC_005574	0.000226162	4.14236	down	LincRNAs identified by Cabili et al	498	chr6	-	1308820	1311276	upstream	NM_033260	FOXQ1	forkhead box protein Q1	0.02533	2.41633	down	chr6	+	1312674	1314993
TCONS_00012113	XLOC_005647	0.000226162	3.92311	down	LincRNAs identified by Cabili et al	1772	chr6	-	25997714	26006496	upstream	ENST00000244601	HIST1H2BG	histone cluster 1, H2bg [Source:HGNC Symbol;Acc:4746]	6.77606e-05	2.39119	up	chr6	-	26216427	26216872
TCONS_00012113	XLOC_005647	0.000226162	3.92311	down	LincRNAs identified by Cabili et al	1772	chr6	-	25997714	26006496	upstream	ENST00000343677	HIST1H1C	histone cluster 1, H1c [Source:HGNC Symbol;Acc:4716]	0.00093163	2.16744	down	chr6	-	26055967	26056699
TCONS_00012113	XLOC_005647	0.000226162	3.92311	down	LincRNAs identified by Cabili et al	1772	chr6	-	25997714	26006496	upstream	ENST00000356350	HIST1H2BH	histone cluster 1, H2bh [Source:HGNC Symbol;Acc:4755]	5.36487e-07	3.9983	up	chr6	+	26251878	26252303
TCONS_00012113	XLOC_005647	0.000226162	3.92311	down	LincRNAs identified by Cabili et al	1772	chr6	-	25997714	26006496	upstream	NM_000410	HFE	hereditary hemochromatosis protein isoform 1 precursor	0.00185802	2.11271	down	chr6	+	26087508	26095469
TCONS_00012113	XLOC_005647	0.000226162	3.92311	down	LincRNAs identified by Cabili et al	1772	chr6	-	25997714	26006496	upstream	NM_138720	HIST1H2BD	histone H2B type 1-D	0.00031696	2.61544	up	chr6	+	26158348	26171576
TCONS_00012113	XLOC_005647	0.0170011	3.92311	down	LincRNAs identified by Cabili et al	1772	chr6	-	25997714	26006496	upstream	NM_139003	HFE	hereditary hemochromatosis protein isoform 3 precursor	0.00357235	2.08856	down	chr6	+	26087508	26095469
TCONS_00012238	XLOC_005794	2.55382e-05	2.22133	up	LincRNAs identified by Cabili et al	412	chr6	-	105374368	105379376	upstream	NM_147147	BVES	blood vessel epicardial substance	0.0142536	2.4003	down	chr6	-	105544698	105584221
TCONS_00012278	XLOC_005834	2.55382e-05	2.77533	up	LincRNAs identified by Cabili et al	640	chr6	-	133125512	133134602	downstream	NM_014626	TAAR2	trace amine-associated receptor 2 isoform 2	0.0183324	2.65627	down	chr6	-	132938288	132939232
TCONS_00012278	XLOC_005834	2.55382e-05	2.77533	up	LincRNAs identified by Cabili et al	640	chr6	-	133125512	133134602	downstream	NM_052831	SLC18B1	MFS-type transporter SLC18B1	8.42352e-06	2.71891	up	chr6	-	133090506	133119747
TCONS_00012278	XLOC_005834	0.00546019	2.77533	up	LincRNAs identified by Cabili et al	640	chr6	-	133125512	133134602	downstream	NM_078488	VNN2	vascular non-inflammatory molecule 2 isoform 2	0.00333674	2.1202	up	chr6	-	133065008	133084598
TCONS_00012375	XLOC_005942	0.00272486	2.22059	up	LincRNAs identified by Cabili et al	452	chr6	-	170337138	170337952	upstream	NM_005618	DLL1	delta-like protein 1 precursor	0.000361426	3.18622	up	chr6	-	170591293	170599697
TCONS_00012378	XLOC_005946	6.76129e-07	3.6564	up	LincRNAs identified by Cabili et al	908	chr6	-	170481453	170492362	upstream	NM_005618	DLL1	delta-like protein 1 precursor	0.000361426	3.18622	up	chr6	-	170591293	170599697
TCONS_00012412	XLOC_005155	6.76129e-07	3.63198	up	LincRNAs identified by Cabili et al	345	chr6	+	7439354	7453025	downstream	NM_004415	DSP	desmoplakin isoform I	4.64557e-06	4.99434	up	chr6	+	7541869	7586946
TCONS_00012412	XLOC_005155	6.76129e-07	3.63198	up	LincRNAs identified by Cabili et al	345	chr6	+	7439354	7453025	upstream	NM_001003699	RREB1	ras-responsive element-binding protein 1 isoform 1	0.000604139	3.10839	down	chr6	+	7108085	7252213
TCONS_00012412	XLOC_005155	0.000165824	3.63198	up	LincRNAs identified by Cabili et al	345	chr6	+	7439354	7453025	upstream	NM_001003700	RREB1	ras-responsive element-binding protein 1 isoform 3	0.00890243	2.75788	down	chr6	+	7108085	7252213
TCONS_00012634	XLOC_005563	0.00862053	6.72618	up	LincRNAs identified by Cabili et al	1339	chr6	+	170489432	170491877	downstream	NM_005618	DLL1	delta-like protein 1 precursor	0.000361426	3.18622	up	chr6	-	170591293	170599697
TCONS_00012771	XLOC_005807	0.00862053	2.01523	up	LincRNAs identified by Cabili et al	416	chr6	-	112697489	112717623	downstream	NM_001033564	C6orf225	UPF0731 protein C6orf225	0.00413694	2.03624	up	chr6	+	112408673	112423993
TCONS_00012771	XLOC_005807	0.00862053	2.01523	up	LincRNAs identified by Cabili et al	416	chr6	-	112697489	112717623	downstream	NM_001105206	LAMA4	laminin subunit alpha-4 isoform 1 precursor	7.62583e-05	3.46093	down	chr6	-	112429133	112575917
TCONS_00012771	XLOC_005807	0.00862053	2.01523	up	LincRNAs identified by Cabili et al	416	chr6	-	112697489	112717623	downstream	NM_001105209	LAMA4	laminin subunit alpha-4 isoform 3 precursor	0.00129297	3.74113	down	chr6	-	112574983	112575917
TCONS_00012771	XLOC_005807	0.00417766	2.01523	up	LincRNAs identified by Cabili et al	416	chr6	-	112697489	112717623	downstream	NM_002290	LAMA4	laminin subunit alpha-4 isoform 2 precursor	6.24388e-05	3.22822	down	chr6	-	112429133	112575917
TCONS_00013023	XLOC_006153	0.00536429	2.30959	down	LincRNAs identified by Cabili et al	580	chr7	+	77299281	77300699	downstream	NM_198467	RSBN1L	round spermatid basic protein 1-like protein	0.0159316	2.39982	down	chr7	+	77325742	77409120
TCONS_00013170	XLOC_006441	0.00536429	2.01951	down	LincRNAs identified by Cabili et al	2566	chr7	-	50518333	50521012	downstream	NM_001220765	IKZF1	DNA-binding protein Ikaros isoform 2	0.000182863	2.71013	up	chr7	+	50344377	50472798
TCONS_00013170	XLOC_006441	0.00536429	2.01951	down	LincRNAs identified by Cabili et al	2566	chr7	-	50518333	50521012	downstream	NM_001220767	IKZF1	DNA-binding protein Ikaros isoform 4	0.00181369	2.32792	up	chr7	+	50344377	50472798
TCONS_00013170	XLOC_006441	0.00536429	2.01951	down	LincRNAs identified by Cabili et al	2566	chr7	-	50518333	50521012	downstream	NM_001220769	IKZF1	DNA-binding protein Ikaros isoform 6	0.000249923	2.03353	up	chr7	+	50344377	50472798
TCONS_00013170	XLOC_006441	0.00536429	2.01951	down	LincRNAs identified by Cabili et al	2566	chr7	-	50518333	50521012	downstream	NM_001220772	IKZF1	DNA-binding protein Ikaros isoform 9	2.43105e-06	2.4363	up	chr7	+	50344377	50472798
TCONS_00013170	XLOC_006441	0.00536429	2.01951	down	LincRNAs identified by Cabili et al	2566	chr7	-	50518333	50521012	downstream	NM_001220775	IKZF1	DNA-binding protein Ikaros isoform 12	4.76342e-05	2.84629	up	chr7	+	50344377	50472798
TCONS_00013170	XLOC_006441	0.00536429	2.01951	down	LincRNAs identified by Cabili et al	2566	chr7	-	50518333	50521012	upstream	ENST00000335866	GRB10	growth factor receptor-bound protein 10 [Source:HGNC Symbol;Acc:4564]	0.000271488	2.72489	down	chr7	-	50657759	50861159
TCONS_00013170	XLOC_006441	0.00536429	2.01951	down	LincRNAs identified by Cabili et al	2566	chr7	-	50518333	50521012	upstream	ENST00000398812	GRB10	growth factor receptor-bound protein 10 [Source:HGNC Symbol;Acc:4564]	0.000442991	4.87202	down	chr7	-	50657759	50800050
TCONS_00013170	XLOC_006441	0.000164689	2.01951	down	LincRNAs identified by Cabili et al	2566	chr7	-	50518333	50521012	upstream	NM_001001549	GRB10	growth factor receptor-bound protein 10 isoform b	0.000163473	2.88114	down	chr7	-	50657759	50800050
TCONS_00013287	XLOC_005955	0.000164689	2.07036	up	LincRNAs identified by Cabili et al	1258	chr7	+	389256	390969	downstream	NM_002607	PDGFA	platelet-derived growth factor subunit A isoform 1 preproprotein	0.00540696	2.24277	up	chr7	-	536896	559481
TCONS_00013287	XLOC_005955	7.088e-07	2.07036	up	LincRNAs identified by Cabili et al	1258	chr7	+	389256	390969	upstream	NM_020223	FAM20C	extracellular serine/threonine protein kinase Fam20C precursor	0.00482762	2.76165	down	chr7	+	192968	300740
TCONS_00013319	XLOC_005968	7.088e-07	5.52524	down	LincRNAs identified by Cabili et al	3365	chr7	+	2479468	2483692	downstream	NM_007353	GNA12	guanine nucleotide-binding protein subunit alpha-12	0.00477247	2.33883	down	chr7	-	2767740	2883959
TCONS_00013319	XLOC_005968	0.0229574	5.52524	down	LincRNAs identified by Cabili et al	3365	chr7	+	2479468	2483692	downstream	NM_025250	TTYH3	protein tweety homolog 3	8.60784e-05	2.13403	down	chr7	+	2671602	2704436
TCONS_00013320	XLOC_005968	0.0229574	2.3046	down	LincRNAs identified by Cabili et al	3042	chr7	+	2482208	2488305	downstream	NM_007353	GNA12	guanine nucleotide-binding protein subunit alpha-12	0.00477247	2.33883	down	chr7	-	2767740	2883959
TCONS_00013320	XLOC_005968	0.000595193	2.3046	down	LincRNAs identified by Cabili et al	3042	chr7	+	2482208	2488305	downstream	NM_025250	TTYH3	protein tweety homolog 3	8.60784e-05	2.13403	down	chr7	+	2671602	2704436
TCONS_00013321	XLOC_005968	0.000595193	7.2183	down	LincRNAs identified by Cabili et al	2711	chr7	+	2483191	2488106	downstream	NM_007353	GNA12	guanine nucleotide-binding protein subunit alpha-12	0.00477247	2.33883	down	chr7	-	2767740	2883959
TCONS_00013321	XLOC_005968	0.00198879	7.2183	down	LincRNAs identified by Cabili et al	2711	chr7	+	2483191	2488106	downstream	NM_025250	TTYH3	protein tweety homolog 3	8.60784e-05	2.13403	down	chr7	+	2671602	2704436
TCONS_00013440	XLOC_006088	0.00198879	4.67931	down	LincRNAs identified by Cabili et al	1257	chr7	+	47622654	47630846	downstream	NM_025031	C7orf69	uncharacterized protein C7orf69 precursor	0.00314712	3.39293	down	chr7	+	47834888	47859444
TCONS_00013440	XLOC_006088	0.0247702	4.67931	down	LincRNAs identified by Cabili et al	1257	chr7	+	47622654	47630846	upstream	ENST00000311160	TNS3	tensin 3 [Source:HGNC Symbol;Acc:21616]	0.00130085	5.67375	down	chr7	-	47314751	47621742
TCONS_00013540	XLOC_006179	5.47005e-05	2.00336	up	LincRNAs identified by Cabili et al	920	chr7	+	95308462	95311461	upstream	NM_002612	PDK4	pyruvate dehydrogenase kinase, isozyme 4	6.19486e-08	8.40622	down	chr7	-	95212808	95225925
TCONS_00013572	XLOC_006223	5.47005e-05	2.98645	down	LincRNAs identified by Cabili et al	403	chr7	+	123175305	123175887	downstream	NM_003941	WASL	neural Wiskott-Aldrich syndrome protein	2.77731e-07	3.39695	down	chr7	-	123321996	123389116
TCONS_00013572	XLOC_006223	1.24142e-06	2.98645	down	LincRNAs identified by Cabili et al	403	chr7	+	123175305	123175887	upstream	NM_178827	IQUB	IQ and ubiquitin-like domain-containing protein	0.0354442	2.68529	up	chr7	-	123092235	123174718
TCONS_00013584	XLOC_006239	1.24142e-06	3.83118	down	LincRNAs identified by Cabili et al	354	chr7	+	127752093	127758774	downstream	NM_000883	IMPDH1	inosine-5'-monophosphate dehydrogenase 1 isoform a	0.00459649	2.15044	down	chr7	-	128032330	128050036
TCONS_00013584	XLOC_006239	1.24142e-06	3.83118	down	LincRNAs identified by Cabili et al	354	chr7	+	127752093	127758774	downstream	NM_001102605	IMPDH1	inosine-5'-monophosphate dehydrogenase 1 isoform c	0.00432085	2.07262	down	chr7	-	128032330	128050036
TCONS_00013584	XLOC_006239	1.24142e-06	3.83118	down	LincRNAs identified by Cabili et al	354	chr7	+	127752093	127758774	downstream	NM_001142574	IMPDH1	inosine-5'-monophosphate dehydrogenase 1 isoform f	0.00059255	2.41507	down	chr7	-	128032330	128046024
TCONS_00013584	XLOC_006239	1.24142e-06	3.83118	down	LincRNAs identified by Cabili et al	354	chr7	+	127752093	127758774	downstream	NM_001142575	IMPDH1	inosine-5'-monophosphate dehydrogenase 1 isoform g	2.75152e-05	3.13425	down	chr7	-	128032330	128046024
TCONS_00013584	XLOC_006239	1.24142e-06	3.83118	down	LincRNAs identified by Cabili et al	354	chr7	+	127752093	127758774	downstream	NM_001142576	IMPDH1	inosine-5'-monophosphate dehydrogenase 1 isoform d	0.000248046	2.75036	down	chr7	-	128032330	128050036
TCONS_00013584	XLOC_006239	0.00120427	3.83118	down	LincRNAs identified by Cabili et al	354	chr7	+	127752093	127758774	downstream	NM_183243	IMPDH1	inosine-5'-monophosphate dehydrogenase 1 isoform b	0.00280287	3.11347	down	chr7	-	128032330	128050036
TCONS_00013637	XLOC_006299	3.88878e-05	3.09879	down	LincRNAs identified by Cabili et al	422	chr7	+	153445241	153446094	downstream	NM_001039350	DPP6	dipeptidyl aminopeptidase-like protein 6 isoform 3	4.33e-11	23.393	down	chr7	+	153584418	154685995
TCONS_00013639	XLOC_006301	3.88878e-05	4.36454	down	LincRNAs identified by Cabili et al	463	chr7	+	154795153	154806834	upstream	NM_001039350	DPP6	dipeptidyl aminopeptidase-like protein 6 isoform 3	4.33e-11	23.393	down	chr7	+	153584418	154685995
TCONS_00013639	XLOC_006301	0.000699875	4.36454	down	LincRNAs identified by Cabili et al	463	chr7	+	154795153	154806834	upstream	NM_130797	DPP6	dipeptidyl aminopeptidase-like protein 6 isoform 1	4.38e-11	31.8443	down	chr7	+	153749776	154685995
TCONS_00013640	XLOC_006301	0.000699875	2.70018	down	LincRNAs identified by Cabili et al	475	chr7	+	154795153	154806834	upstream	NM_001039350	DPP6	dipeptidyl aminopeptidase-like protein 6 isoform 3	4.33e-11	23.393	down	chr7	+	153584418	154685995
TCONS_00013640	XLOC_006301	0.00548202	2.70018	down	LincRNAs identified by Cabili et al	475	chr7	+	154795153	154806834	upstream	NM_130797	DPP6	dipeptidyl aminopeptidase-like protein 6 isoform 1	4.38e-11	31.8443	down	chr7	+	153749776	154685995
TCONS_00013642	XLOC_006301	0.00548202	2.10698	down	LincRNAs identified by Cabili et al	1783	chr7	+	154795156	154797398	upstream	NM_001039350	DPP6	dipeptidyl aminopeptidase-like protein 6 isoform 3	4.33e-11	23.393	down	chr7	+	153584418	154685995
TCONS_00013642	XLOC_006301	8.04144e-07	2.10698	down	LincRNAs identified by Cabili et al	1783	chr7	+	154795156	154797398	upstream	NM_130797	DPP6	dipeptidyl aminopeptidase-like protein 6 isoform 1	4.38e-11	31.8443	down	chr7	+	153749776	154685995
TCONS_00013643	XLOC_006301	8.04144e-07	2.47386	down	LincRNAs identified by Cabili et al	1753	chr7	+	154795167	154797391	upstream	NM_001039350	DPP6	dipeptidyl aminopeptidase-like protein 6 isoform 3	4.33e-11	23.393	down	chr7	+	153584418	154685995
TCONS_00013643	XLOC_006301	2.96143e-06	2.47386	down	LincRNAs identified by Cabili et al	1753	chr7	+	154795167	154797391	upstream	NM_130797	DPP6	dipeptidyl aminopeptidase-like protein 6 isoform 1	4.38e-11	31.8443	down	chr7	+	153749776	154685995
TCONS_00013644	XLOC_006301	2.96143e-06	2.28332	down	LincRNAs identified by Cabili et al	1954	chr7	+	154795168	154797375	upstream	NM_001039350	DPP6	dipeptidyl aminopeptidase-like protein 6 isoform 3	4.33e-11	23.393	down	chr7	+	153584418	154685995
TCONS_00013644	XLOC_006301	0.011906	2.28332	down	LincRNAs identified by Cabili et al	1954	chr7	+	154795168	154797375	upstream	NM_130797	DPP6	dipeptidyl aminopeptidase-like protein 6 isoform 1	4.38e-11	31.8443	down	chr7	+	153749776	154685995
TCONS_00013713	XLOC_006364	0.0293069	2.21651	up	LincRNAs identified by Cabili et al	856	chr7	-	19039115	19040901	downstream	NM_178425	HDAC9	histone deacetylase 9 isoform 5	0.00029996	2.01852	up	chr7	+	18535884	19036992
TCONS_00013975	XLOC_006613	0.0293069	2.41879	down	LincRNAs identified by Cabili et al	482	chr7	-	134102144	134102761	upstream	NM_001080538	AKR1B15	aldo-keto reductase family 1 member B15	0.00433416	5.65665	down	chr7	+	134233848	134264592
TCONS_00013975	XLOC_006613	9.352e-10	2.41879	down	LincRNAs identified by Cabili et al	482	chr7	-	134102144	134102761	upstream	NM_020299	AKR1B10	aldo-keto reductase family 1 member B10	0.000369436	8.36055	down	chr7	+	134212343	134226166
TCONS_00014003	XLOC_006644	9.352e-10	28.3648	down	LincRNAs identified by Cabili et al	277	chr7	-	149903392	149917567	upstream	NM_001099695	REPIN1	replication initiator 1 isoform 3	0.000568082	2.57973	down	chr7	+	150065878	150071133
TCONS_00014003	XLOC_006644	9.352e-10	28.3648	down	LincRNAs identified by Cabili et al	277	chr7	-	149903392	149917567	upstream	NM_002889	RARRES2	retinoic acid receptor responder protein 2 precursor	0.00108325	5.42538	down	chr7	-	150035406	150038763
TCONS_00014003	XLOC_006644	5.72652e-06	28.3648	down	LincRNAs identified by Cabili et al	277	chr7	-	149903392	149917567	upstream	NM_175571	GIMAP8	GTPase IMAP family member 8	4.41953e-05	2.04335	up	chr7	+	150147961	150176483
TCONS_00014042	XLOC_005955	5.72652e-06	2.2473	up	LincRNAs identified by Cabili et al	849	chr7	+	389823	391347	downstream	NM_002607	PDGFA	platelet-derived growth factor subunit A isoform 1 preproprotein	0.00540696	2.24277	up	chr7	-	536896	559481
TCONS_00014042	XLOC_005955	0.000127583	2.2473	up	LincRNAs identified by Cabili et al	849	chr7	+	389823	391347	upstream	NM_020223	FAM20C	extracellular serine/threonine protein kinase Fam20C precursor	0.00482762	2.76165	down	chr7	+	192968	300740
TCONS_00014179	XLOC_006188	0.000127583	3.18095	up	LincRNAs identified by Cabili et al	233	chr7	+	99597001	99605862	downstream	NM_001190415	TAF6	transcription initiation factor TFIID subunit 6 isoform epsilon	0.000595686	2.0899	down	chr7	-	99704692	99717481
TCONS_00014179	XLOC_006188	0.000127583	3.18095	up	LincRNAs identified by Cabili et al	233	chr7	+	99597001	99605862	upstream	NM_033091	TRIM4	tripartite motif-containing protein 4 isoform beta	0.00225654	3.00625	down	chr7	-	99488029	99517223
TCONS_00014179	XLOC_006188	0.000127583	3.18095	up	LincRNAs identified by Cabili et al	233	chr7	+	99597001	99605862	upstream	NM_057095	CYP3A43	cytochrome P450 3A43 isoform 2	5.6999e-09	3.47016	down	chr7	+	99425635	99464173
TCONS_00014179	XLOC_006188	0.0032516	3.18095	up	LincRNAs identified by Cabili et al	233	chr7	+	99597001	99605862	upstream	NM_057096	CYP3A43	cytochrome P450 3A43 isoform 3	1.09669e-05	3.55825	down	chr7	+	99425635	99464173
TCONS_00014197	XLOC_006223	0.0032516	2.84019	down	LincRNAs identified by Cabili et al	322	chr7	+	123175277	123175873	downstream	NM_003941	WASL	neural Wiskott-Aldrich syndrome protein	2.77731e-07	3.39695	down	chr7	-	123321996	123389116
TCONS_00014197	XLOC_006223	1.31091e-06	2.84019	down	LincRNAs identified by Cabili et al	322	chr7	+	123175277	123175873	upstream	NM_178827	IQUB	IQ and ubiquitin-like domain-containing protein	0.0354442	2.68529	up	chr7	-	123092235	123174718
TCONS_00014652	XLOC_006742	1.31091e-06	2.24936	up	LincRNAs identified by Cabili et al	1539	chr8	+	23086939	23088598	upstream	NM_001160036	RHOBTB2	rho-related BTB domain-containing protein 2 isoform 1	0.0327259	2.34824	down	chr8	+	22844929	22877710
TCONS_00014652	XLOC_006742	1.31091e-06	2.24936	up	LincRNAs identified by Cabili et al	1539	chr8	+	23086939	23088598	upstream	NM_001160037	RHOBTB2	rho-related BTB domain-containing protein 2 isoform 2	0.0110982	2.74217	down	chr8	+	22853360	22877710
TCONS_00014652	XLOC_006742	1.31091e-06	2.24936	up	LincRNAs identified by Cabili et al	1539	chr8	+	23086939	23088598	upstream	NM_003844	TNFRSF10A	tumor necrosis factor receptor superfamily member 10A	0.000214316	2.69308	up	chr8	-	23048969	23082680
TCONS_00014652	XLOC_006742	0.00131545	2.24936	up	LincRNAs identified by Cabili et al	1539	chr8	+	23086939	23088598	upstream	NM_015178	RHOBTB2	rho-related BTB domain-containing protein 2 isoform 3	0.00730021	2.09193	down	chr8	+	22857091	22877710
TCONS_00014758	XLOC_006843	0.000226638	4.82901	up	LincRNAs identified by Cabili et al	391	chr8	+	74005609	74006141	downstream	NM_172037	RDH10	retinol dehydrogenase 10	0.000230919	2.47705	up	chr8	+	74206836	74237520
TCONS_00014763	XLOC_006846	0.00146069	2.54969	up	LincRNAs identified by Cabili et al	676	chr8	+	75015624	75019100	upstream	NM_015364	LY96	lymphocyte antigen 96 isoform 1 precursor	0.000240852	2.84868	up	chr8	+	74903563	74941307
TCONS_00014807	XLOC_006882	0.00146069	2.73832	down	LincRNAs identified by Cabili et al	251	chr8	+	101468464	101512596	upstream	NM_003114	SPAG1	sperm-associated antigen 1	0.00732798	2.4223	up	chr8	+	101170562	101254132
TCONS_00014807	XLOC_006882	3.11e-11	2.73832	down	LincRNAs identified by Cabili et al	251	chr8	+	101468464	101512596	upstream	NM_183419	RNF19A	E3 ubiquitin-protein ligase RNF19A	7.60724e-07	2.16678	down	chr8	-	101269287	101322379
TCONS_00014860	XLOC_006928	0.000528953	9.74458	down	LincRNAs identified by Cabili et al	312	chr8	+	132065958	132101711	upstream	NM_001115	ADCY8	adenylate cyclase type 8	1.37e-09	13.8278	down	chr8	-	131792546	132052835
TCONS_00014933	XLOC_007004	0.000252914	18.7405	down	LincRNAs identified by Cabili et al	788	chr8	-	10436254	10438247	upstream	NM_017884	PINX1	PIN2/TERF1-interacting telomerase inhibitor 1	0.00395666	2.81438	up	chr8	-	10622883	10697299
TCONS_00016018	XLOC_007412	0.000252914	2.27488	up	LincRNAs identified by Cabili et al	356	chr9	+	77791048	77794685	upstream	ENST00000361255	TRPM6	transient receptor potential cation channel, subfamily M, member 6 [Source:HGNC Symbol;Acc:17995]	2.10267e-07	65.7718	down	chr9	-	77337410	77502263
TCONS_00016018	XLOC_007412	0.0219023	2.27488	up	LincRNAs identified by Cabili et al	356	chr9	+	77791048	77794685	upstream	NM_017998	C9orf40	uncharacterized protein C9orf40	1.2293e-05	2.26048	up	chr9	-	77561498	77567802
TCONS_00016034	XLOC_007429	0.00473493	3.88128	up	LincRNAs identified by Cabili et al	617	chr9	+	87193531	87199274	downstream	ENST00000376213	NTRK2	neurotrophic tyrosine kinase, receptor, type 2 [Source:HGNC Symbol;Acc:8032]	4e-13	6.992	down	chr9	+	87283465	87638505
TCONS_00016076	XLOC_007467	0.00473493	2.40712	down	LincRNAs identified by Cabili et al	216	chr9	+	97075821	97076871	upstream	ENST00000375360	PTPDC1	protein tyrosine phosphatase domain containing 1 [Source:HGNC Symbol;Acc:30184]	0.0024597	2.8785	down	chr9	+	96793075	96872138
TCONS_00016076	XLOC_007467	0.000361964	2.40712	down	LincRNAs identified by Cabili et al	216	chr9	+	97075821	97076871	upstream	NM_152422	PTPDC1	protein tyrosine phosphatase domain-containing protein 1 isoform 1	0.000178311	3.34797	down	chr9	+	96846710	96872138
TCONS_00016085	XLOC_007475	0.000361964	3.26031	down	LincRNAs identified by Cabili et al	1897	chr9	+	98527279	98538745	upstream	NM_000264	PTCH1	protein patched homolog 1 isoform L	1.77901e-05	5.79927	down	chr9	-	98205263	98270831
TCONS_00016085	XLOC_007475	0.000361964	3.26031	down	LincRNAs identified by Cabili et al	1897	chr9	+	98527279	98538745	upstream	NM_001083602	PTCH1	protein patched homolog 1 isoform M	0.000722871	6.11793	down	chr9	-	98205263	98279247
TCONS_00016085	XLOC_007475	0.000361964	3.26031	down	LincRNAs identified by Cabili et al	1897	chr9	+	98527279	98538745	upstream	NM_001083603	PTCH1	protein patched homolog 1 isoform L'	2.68617e-06	4.66844	down	chr9	-	98205263	98279247
TCONS_00016085	XLOC_007475	5.29774e-05	3.26031	down	LincRNAs identified by Cabili et al	1897	chr9	+	98527279	98538745	upstream	NM_001083607	PTCH1	protein patched homolog 1 isoform S	1.71563e-05	3.15252	down	chr9	-	98205263	98269481
TCONS_00016160	XLOC_007571	5.29774e-05	4.10364	down	LincRNAs identified by Cabili et al	206	chr9	+	130349967	130354487	downstream	NM_170600	SH2D3C	SH2 domain-containing protein 3C isoform a	0.00714053	2.4486	up	chr9	-	130500595	130541048
TCONS_00016160	XLOC_007571	5.29774e-05	4.10364	down	LincRNAs identified by Cabili et al	206	chr9	+	130349967	130354487	upstream	NM_001190723	LRSAM1	E3 ubiquitin-protein ligase LRSAM1 isoform 2	0.00174117	3.46729	down	chr9	+	130213764	130265780
TCONS_00016160	XLOC_007571	0.0134343	4.10364	down	LincRNAs identified by Cabili et al	206	chr9	+	130349967	130354487	upstream	NM_022833	FAM129B	niban-like protein 1 isoform 1	4.6091e-06	2.27033	down	chr9	-	130267617	130331355
TCONS_00016205	XLOC_007595	0.0448658	2.01354	up	LincRNAs identified by Cabili et al	666	chr9	+	136619186	136620083	upstream	ENST00000371929	ADAMTS13	ADAM metallopeptidase with thrombospondin type 1 motif, 13 [Source:HGNC Symbol;Acc:1366]	0.000213432	2.69659	down	chr9	+	136287119	136324508
TCONS_00016263	XLOC_007635	0.0448658	2.85377	down	LincRNAs identified by Cabili et al	283	chr9	-	5308117	5311063	downstream	NM_002195	INSL4	early placenta insulin-like peptide precursor	0.00339319	2.16698	down	chr9	+	5231418	5233967
TCONS_00016263	XLOC_007635	7.33085e-07	2.85377	down	LincRNAs identified by Cabili et al	283	chr9	-	5308117	5311063	downstream	NM_134441	RLN2	prorelaxin H2 isoform 1 preproprotein	0.000257369	3.25194	down	chr9	-	5299867	5304580
TCONS_00016340	XLOC_007720	0.00262401	2.56296	down	LincRNAs identified by Cabili et al	719	chr9	-	70958613	70966054	upstream	ENST00000396396	PGM5	phosphoglucomutase 5 [Source:HGNC Symbol;Acc:8908]	0.00394738	2.45028	down	chr9	+	70971814	71145977
TCONS_00016513	XLOC_007896	0.00262401	9.62933	up	LincRNAs identified by Cabili et al	371	chr9	-	139506485	139508248	downstream	ENST00000429455	GPSM1	G-protein signaling modulator 1 [Source:HGNC Symbol;Acc:17858]	0.000563902	2.00532	down	chr9	+	139247508	139254057
TCONS_00016513	XLOC_007896	0.00262401	9.62933	up	LincRNAs identified by Cabili et al	371	chr9	-	139506485	139508248	downstream	ENST00000440944	GPSM1	G-protein signaling modulator 1 [Source:HGNC Symbol;Acc:17858]	0.0397809	2.10178	down	chr9	+	139221931	139254057
TCONS_00016513	XLOC_007896	0.00262401	9.62933	up	LincRNAs identified by Cabili et al	371	chr9	-	139506485	139508248	upstream	ENST00000371663	C9orf86	chromosome 9 open reading frame 86 [Source:HGNC Symbol;Acc:24703]	1.86347e-06	2.31087	down	chr9	+	139702373	139735639
TCONS_00016513	XLOC_007896	0.00355332	9.62933	up	LincRNAs identified by Cabili et al	371	chr9	-	139506485	139508248	upstream	NM_001173989	C9orf86	rab-like protein 1 isoform 4	2.953e-05	2.52343	down	chr9	+	139702373	139728928
TCONS_00016514	XLOC_007896	0.00355332	9.01361	up	LincRNAs identified by Cabili et al	703	chr9	-	139506545	139507780	downstream	ENST00000429455	GPSM1	G-protein signaling modulator 1 [Source:HGNC Symbol;Acc:17858]	0.000563902	2.00532	down	chr9	+	139247508	139254057
TCONS_00016514	XLOC_007896	0.00355332	9.01361	up	LincRNAs identified by Cabili et al	703	chr9	-	139506545	139507780	downstream	ENST00000440944	GPSM1	G-protein signaling modulator 1 [Source:HGNC Symbol;Acc:17858]	0.0397809	2.10178	down	chr9	+	139221931	139254057
TCONS_00016514	XLOC_007896	0.00355332	9.01361	up	LincRNAs identified by Cabili et al	703	chr9	-	139506545	139507780	upstream	ENST00000371663	C9orf86	chromosome 9 open reading frame 86 [Source:HGNC Symbol;Acc:24703]	1.86347e-06	2.31087	down	chr9	+	139702373	139735639
TCONS_00016514	XLOC_007896	2.4627e-05	9.01361	up	LincRNAs identified by Cabili et al	703	chr9	-	139506545	139507780	upstream	NM_001173989	C9orf86	rab-like protein 1 isoform 4	2.953e-05	2.52343	down	chr9	+	139702373	139728928
TCONS_00016903	XLOC_007896	2.4627e-05	12.8022	up	LincRNAs identified by Cabili et al	379	chr9	-	139506485	139510295	downstream	ENST00000429455	GPSM1	G-protein signaling modulator 1 [Source:HGNC Symbol;Acc:17858]	0.000563902	2.00532	down	chr9	+	139247508	139254057
TCONS_00016903	XLOC_007896	2.4627e-05	12.8022	up	LincRNAs identified by Cabili et al	379	chr9	-	139506485	139510295	downstream	ENST00000440944	GPSM1	G-protein signaling modulator 1 [Source:HGNC Symbol;Acc:17858]	0.0397809	2.10178	down	chr9	+	139221931	139254057
TCONS_00016903	XLOC_007896	2.4627e-05	12.8022	up	LincRNAs identified by Cabili et al	379	chr9	-	139506485	139510295	upstream	ENST00000371663	C9orf86	chromosome 9 open reading frame 86 [Source:HGNC Symbol;Acc:24703]	1.86347e-06	2.31087	down	chr9	+	139702373	139735639
TCONS_00016903	XLOC_007896	0.0208543	12.8022	up	LincRNAs identified by Cabili et al	379	chr9	-	139506485	139510295	upstream	NM_001173989	C9orf86	rab-like protein 1 isoform 4	2.953e-05	2.52343	down	chr9	+	139702373	139728928
TCONS_00017068	XLOC_008182	5.92039e-08	2.46902	up	LincRNAs identified by Cabili et al	4113	chrX	-	70994969	71004228	downstream	NM_001145140	CXorf49	uncharacterized protein CXorf49	4.45247e-05	4.25588	down	chrX	-	70934223	70938135
TCONS_00017181	XLOC_007993	5.95351e-07	2.28253	down	LincRNAs identified by Cabili et al	1347	chrX	+	56316469	56325981	upstream	NM_007250	KLF8	Krueppel-like factor 8 isoform 1	4.59074e-06	2.20201	down	chrX	+	56258821	56314322
TCONS_00017237	XLOC_008058	5.95351e-07	3.84266	down	LincRNAs identified by Cabili et al	2019	chrX	+	119124752	119127773	upstream	NM_001008534	AKAP14	A-kinase anchor protein 14 isoform b	0.000708046	49.8949	up	chrX	+	119029935	119054679
TCONS_00017237	XLOC_008058	5.95351e-07	3.84266	down	LincRNAs identified by Cabili et al	2019	chrX	+	119124752	119127773	upstream	NM_001105576	SOWAHD	ankyrin repeat domain-containing protein SOWAHD	9.45988e-05	3.02889	up	chrX	+	118892575	118894165
TCONS_00017237	XLOC_008058	5.95351e-07	3.84266	down	LincRNAs identified by Cabili et al	2019	chrX	+	119124752	119127773	upstream	NM_015129	SEPT6	septin-6 isoform B	0.000373692	2.99131	down	chrX	-	118750908	118827333
TCONS_00017237	XLOC_008058	1.95756e-05	3.84266	down	LincRNAs identified by Cabili et al	2019	chrX	+	119124752	119127773	upstream	NM_145802	SEPT6	septin-6 isoform D	0.000231638	3.5238	down	chrX	-	118749687	118827333
TCONS_00017250	XLOC_008072	1.95756e-05	3.31805	down	LincRNAs identified by Cabili et al	4248	chrX	+	134169665	134174761	upstream	NM_001078171	FAM127A	protein FAM127A	0.0177388	3.06596	down	chrX	+	134166332	134167575
TCONS_00017250	XLOC_008072	8.02553e-07	3.31805	down	LincRNAs identified by Cabili et al	4248	chrX	+	134169665	134174761	upstream	NM_138819	FAM122C	protein FAM122C isoform 2	0.000337966	2.11719	down	chrX	+	133941222	133988641
TCONS_00017335	XLOC_008182	6.87266e-06	2.44054	up	LincRNAs identified by Cabili et al	651	chrX	-	71000376	71004546	downstream	NM_001145140	CXorf49	uncharacterized protein CXorf49	4.45247e-05	4.25588	down	chrX	-	70934223	70938135
TCONS_00017369	XLOC_008233	6.87266e-06	2.79608	down	LincRNAs identified by Cabili et al	285	chrX	-	128809963	128812358	downstream	NM_003069	SMARCA1	probable global transcription activator SNF2L1 isoform a	4.69946e-07	3.30748	down	chrX	-	128580477	128657460
TCONS_00017369	XLOC_008233	6.87266e-06	2.79608	down	LincRNAs identified by Cabili et al	285	chrX	-	128809963	128812358	downstream	NM_017413	APLN	apelin preproprotein	1.68182e-05	3.96224	up	chrX	-	128779235	128788933
TCONS_00017369	XLOC_008233	9.7143e-09	2.79608	down	LincRNAs identified by Cabili et al	285	chrX	-	128809963	128812358	downstream	NM_139035	SMARCA1	probable global transcription activator SNF2L1 isoform b	0.0212135	2.48634	down	chrX	-	128580477	128657460
TCONS_00017499	XLOC_008151	0.00455542	2.58227	down	LincRNAs identified by Cabili et al	282	chrX	-	46183608	46185222	upstream	NM_001146291	ZNF674	zinc finger protein 674 isoform 2	1.02528e-05	2.55361	down	chrX	-	46357159	46404892
TCONS_00017639	XLOC_008298	2.17097e-07	2.27272	down	LincRNAs identified by Cabili et al	293	chrY	+	21440565	21442464	upstream	NM_013230	CD24	signal transducer CD24 precursor	1.6061e-05	4.56633	down	chrY	-	21152525	21154705
TCONS_00018127	XLOC_008402	0.00765297	3.03896	down	LincRNAs identified by Cabili et al	780	chr10	+	16569513	16581773	downstream	NM_152724	RSU1	ras suppressor protein 1 isoform 2	3.99991e-05	2.09105	up	chr10	-	16632616	16859453
TCONS_00018319	XLOC_008597	3.29e-11	2.4914	up	LincRNAs identified by Cabili et al	360	chr10	+	105682667	105683570	downstream	ENST00000357060	WDR96	WD repeat domain 96 [Source:HGNC Symbol;Acc:26684]	0.00284266	36.7504	up	chr10	-	105889645	105992120
TCONS_00018460	XLOC_008759	9.9315e-07	6.3319	down	LincRNAs identified by Cabili et al	570	chr10	-	27587362	27596344	downstream	NM_145698	ACBD5	acyl-CoA-binding domain-containing protein 5 isoform 1	0.00082589	2.93187	down	chr10	-	27484142	27529808
TCONS_00018569	XLOC_008895	0.0024904	4.11362	up	LincRNAs identified by Cabili et al	1719	chr10	-	89832453	89840364	upstream	NM_001031709	RNLS	renalase isoform 1 precursor	1.66564e-06	2.03473	up	chr10	-	90043858	90343082
TCONS_00018622	XLOC_008975	0.0024904	2.77895	down	LincRNAs identified by Cabili et al	618	chr10	-	124130696	124133962	upstream	ENST00000368984	HTRA1	HtrA serine peptidase 1 [Source:HGNC Symbol;Acc:9476]	0.00153279	3.35331	down	chr10	+	124221040	124274424
TCONS_00018622	XLOC_008975	0.0024904	2.77895	down	LincRNAs identified by Cabili et al	618	chr10	-	124130696	124133962	upstream	NM_004406	DMBT1	deleted in malignant brain tumors 1 protein isoform a precursor	3.06821e-05	12.2492	up	chr10	+	124320180	124403252
TCONS_00018622	XLOC_008975	0.0024904	2.77895	down	LincRNAs identified by Cabili et al	618	chr10	-	124130696	124133962	upstream	NM_007329	DMBT1	deleted in malignant brain tumors 1 protein isoform b precursor	0.00302012	25.8029	up	chr10	+	124320180	124403252
TCONS_00018622	XLOC_008975	6.95732e-06	2.77895	down	LincRNAs identified by Cabili et al	618	chr10	-	124130696	124133962	upstream	NM_017579	DMBT1	deleted in malignant brain tumors 1 protein isoform c precursor	1.79222e-05	17.7698	up	chr10	+	124320180	124403252
TCONS_00019149	XLOC_009180	0.00600895	4.87449	down	LincRNAs identified by Cabili et al	3075	chr11	+	67544665	67550430	downstream	NM_006019	TCIRG1	V-type proton ATPase 116 kDa subunit a isoform 3 isoform a	0.0276554	2.3474	down	chr11	+	67806461	67818366
TCONS_00019182	XLOC_009017	0.00600895	6.10526	up	LincRNAs identified by Cabili et al	1343	chr11	+	356461	358128	downstream	NM_001143993	RASSF7	ras association domain-containing protein 7 isoform 2	0.00322416	2.01309	down	chr11	+	560970	564025
TCONS_00019182	XLOC_009017	0.00600895	6.10526	up	LincRNAs identified by Cabili et al	1343	chr11	+	356461	358128	downstream	NM_020901	PHRF1	PHD and RING finger domain-containing protein 1	0.0292935	2.3899	down	chr11	+	576482	612222
TCONS_00019182	XLOC_009017	0.02212	6.10526	up	LincRNAs identified by Cabili et al	1343	chr11	+	356461	358128	upstream	NM_001025295	IFITM5	interferon-induced transmembrane protein 5	7.46e-11	68.1304	down	chr11	-	298202	299526
TCONS_00019201	XLOC_009034	0.00170097	2.16372	up	LincRNAs identified by Cabili et al	247	chr11	+	3536783	3542040	downstream	NM_001145438	PGAP2	post-GPI attachment to proteins factor 2 isoform 2	1.64362e-05	2.60818	down	chr11	+	3819048	3847601
TCONS_00019322	XLOC_009167	0.00170097	2.0305	down	LincRNAs identified by Cabili et al	708	chr11	+	65218531	65221007	downstream	NM_032223	PCNXL3	pecanex-like protein 3	7.50041e-07	2.41695	down	chr11	+	65383782	65404910
TCONS_00019322	XLOC_009167	3.71943e-08	2.0305	down	LincRNAs identified by Cabili et al	708	chr11	+	65218531	65221007	upstream	NM_031904	FRMD8	FERM domain-containing protein 8	0.00586052	2.04184	down	chr11	+	65154040	65180995
TCONS_00019383	XLOC_009207	3.71943e-08	8.15209	up	LincRNAs identified by Cabili et al	346	chr11	+	72911524	72916328	downstream	NM_014786	ARHGEF17	rho guanine nucleotide exchange factor 17	8.25652e-07	3.74555	down	chr11	+	73019662	73080425
TCONS_00019383	XLOC_009207	8.24603e-07	8.15209	up	LincRNAs identified by Cabili et al	346	chr11	+	72911524	72916328	downstream	NM_176072	P2RY2	P2Y purinoceptor 2	0.0491806	2.48984	up	chr11	+	72929343	72947395
TCONS_00019459	XLOC_009272	0.000146856	2.13751	down	LincRNAs identified by Cabili et al	1228	chr11	+	108370156	108372543	upstream	NM_153705	KDELC2	KDEL motif-containing protein 2 precursor	0.000780665	2.16235	down	chr11	-	108342832	108369159
TCONS_00019584	XLOC_009382	0.000146856	3.38431	up	LincRNAs identified by Cabili et al	386	chr11	-	15932519	15933620	upstream	ENST00000396356	SOX6	SRY (sex determining region Y)-box 6 [Source:HGNC Symbol;Acc:16421]	0.000240896	8.10396	down	chr11	-	15987994	16497935
TCONS_00019584	XLOC_009382	0.000146856	3.38431	up	LincRNAs identified by Cabili et al	386	chr11	-	15932519	15933620	upstream	NM_001145811	SOX6	transcription factor SOX-6 isoform 3	0.000174658	7.3133	down	chr11	-	15987994	16430430
TCONS_00019584	XLOC_009382	0.00475944	3.38431	up	LincRNAs identified by Cabili et al	386	chr11	-	15932519	15933620	upstream	NM_017508	SOX6	transcription factor SOX-6 isoform 1	2.7829e-09	2.88698	down	chr11	-	15987994	16424413
TCONS_00019625	XLOC_009426	0.00475944	2.16979	down	LincRNAs identified by Cabili et al	366	chr11	-	44540874	44542479	downstream	NM_000401	EXT2	exostosin-2 isoform 1	0.0328288	2.64505	down	chr11	+	44117746	44266980
TCONS_00019625	XLOC_009426	0.00475944	2.16979	down	LincRNAs identified by Cabili et al	366	chr11	-	44540874	44542479	upstream	NM_001024844	CD82	CD82 antigen isoform 2	0.000461008	3.07902	up	chr11	+	44587140	44641315
TCONS_00019625	XLOC_009426	0.0208047	2.16979	down	LincRNAs identified by Cabili et al	366	chr11	-	44540874	44542479	upstream	NM_002231	CD82	CD82 antigen isoform 1	0.00125302	2.69683	up	chr11	+	44587140	44641315
TCONS_00019940	XLOC_009185	0.0208047	2.52592	down	LincRNAs identified by Cabili et al	251	chr11	+	68039996	68041986	downstream	NM_002335	LRP5	low-density lipoprotein receptor-related protein 5 precursor	3.08524e-06	3.27881	down	chr11	+	68080107	68216743
TCONS_00019940	XLOC_009185	2.56902e-05	2.52592	down	LincRNAs identified by Cabili et al	251	chr11	+	68039996	68041986	upstream	NM_006019	TCIRG1	V-type proton ATPase 116 kDa subunit a isoform 3 isoform a	0.0276554	2.3474	down	chr11	+	67806461	67818366
TCONS_00020005	XLOC_009301	2.56902e-05	3.92429	up	LincRNAs identified by Cabili et al	488	chr11	+	119776057	119784117	downstream	NM_012101	TRIM29	tripartite motif-containing protein 29	0.0101374	9.589	up	chr11	-	119981993	120008863
TCONS_00020005	XLOC_009301	0.0085587	3.92429	up	LincRNAs identified by Cabili et al	488	chr11	+	119776057	119784117	downstream	NM_178507	OAF	out at first protein homolog precursor	0.00321865	2.09518	up	chr11	+	120081746	120100650
TCONS_00020373	XLOC_009705	0.000871385	4.21	down	LincRNAs identified by Cabili et al	308	chr12	+	32803413	32810771	downstream	NM_001005242	PKP2	plakophilin-2 isoform 2a	2.21512e-06	2.36914	down	chr12	-	32943679	33049780
TCONS_00020499	XLOC_009820	0.0173214	3.30251	down	LincRNAs identified by Cabili et al	596	chr12	+	85763588	85818671	upstream	NM_001079910	LRRIQ1	leucine-rich repeat and IQ domain-containing protein 1	9.26707e-06	13.4464	up	chr12	+	85430098	85638883
TCONS_00020732	XLOC_010031	0.0173214	3.36543	up	LincRNAs identified by Cabili et al	751	chr12	-	25537424	25539101	downstream	NM_006152	LRMP	lymphoid-restricted membrane protein	0.00154471	3.23419	up	chr12	+	25205180	25261269
TCONS_00020732	XLOC_010031	0.0173214	3.36543	up	LincRNAs identified by Cabili et al	751	chr12	-	25537424	25539101	downstream	NM_018272	CASC1	cancer susceptibility candidate protein 1 isoform a	0.0426646	2.5005	up	chr12	-	25261222	25348094
TCONS_00020732	XLOC_010031	1.24282e-05	3.36543	up	LincRNAs identified by Cabili et al	751	chr12	-	25537424	25539101	downstream	NM_033360	KRAS	GTPase KRas isoform a precursor	0.00885314	4.53334	up	chr12	-	25358179	25403854
TCONS_00020805	XLOC_010097	1.24282e-05	4.38026	down	LincRNAs identified by Cabili et al	1415	chr12	-	57477094	57481617	upstream	NM_002332	LRP1	prolow-density lipoprotein receptor-related protein 1 precursor	0.000271227	2.92144	down	chr12	+	57522281	57607125
TCONS_00020805	XLOC_010097	0.0274048	4.38026	down	LincRNAs identified by Cabili et al	1415	chr12	-	57477094	57481617	upstream	NM_020142	NDUFA4L2	NADH dehydrogenase [ubiquinone] 1 alpha subcomplex subunit 4-like 2	0.00529442	7.23487	down	chr12	-	57628685	57634475
TCONS_00020807	XLOC_010097	0.0274048	2.34011	down	LincRNAs identified by Cabili et al	1088	chr12	-	57477661	57480563	upstream	NM_002332	LRP1	prolow-density lipoprotein receptor-related protein 1 precursor	0.000271227	2.92144	down	chr12	+	57522281	57607125
TCONS_00020807	XLOC_010097	0.0314917	2.34011	down	LincRNAs identified by Cabili et al	1088	chr12	-	57477661	57480563	upstream	NM_020142	NDUFA4L2	NADH dehydrogenase [ubiquinone] 1 alpha subcomplex subunit 4-like 2	0.00529442	7.23487	down	chr12	-	57628685	57634475
TCONS_00021005	XLOC_010266	0.00255663	3.92911	up	LincRNAs identified by Cabili et al	1024	chr12	-	131254364	131260323	upstream	NM_198827	GPR133	probable G-protein coupled receptor 133 precursor	0.00552489	3.93193	down	chr12	+	131438451	131626008
TCONS_00021085	XLOC_009678	4.88015e-07	2.01573	down	LincRNAs identified by Cabili et al	240	chr12	+	16814695	16902754	upstream	NM_145792	MGST1	microsomal glutathione S-transferase 1 isoform a	0.000130218	2.25997	down	chr12	+	16500075	16517344
TCONS_00021307	XLOC_010061	2.76644e-06	3.58114	down	LincRNAs identified by Cabili et al	282	chr12	-	46824118	46888235	upstream	NM_001143824	SLC38A4	sodium-coupled neutral amino acid transporter 4	3.162e-09	16.668	down	chr12	-	47158543	47219780
TCONS_00021754	XLOC_010348	2.76644e-06	4.63399	up	LincRNAs identified by Cabili et al	459	chr13	+	38052746	38064928	downstream	NM_001135934	POSTN	periostin isoform 2 precursor	0.00816292	6.87605	up	chr13	-	38136718	38172981
TCONS_00021754	XLOC_010348	2.76644e-06	4.63399	up	LincRNAs identified by Cabili et al	459	chr13	+	38052746	38064928	downstream	NM_001135935	POSTN	periostin isoform 3 precursor	0.00775536	8.82183	up	chr13	-	38136718	38172981
TCONS_00021754	XLOC_010348	0.00219313	4.63399	up	LincRNAs identified by Cabili et al	459	chr13	+	38052746	38064928	downstream	NM_006475	POSTN	periostin isoform 1 precursor	0.023334	8.18285	up	chr13	-	38136718	38172981
TCONS_00021965	XLOC_010561	0.034443	3.15663	up	LincRNAs identified by Cabili et al	827	chr13	-	31627560	31630980	downstream	NM_001629	ALOX5AP	arachidonate 5-lipoxygenase-activating protein isoform 1	0.00300222	2.40225	up	chr13	+	31309644	31338565
TCONS_00022023	XLOC_010617	0.0025867	2.3125	down	LincRNAs identified by Cabili et al	540	chr13	-	51894019	51899105	upstream	NM_052950	WDFY2	WD repeat and FYVE domain-containing protein 2	0.0211123	2.12973	up	chr13	+	52158483	52336171
TCONS_00022086	XLOC_010693	0.0020644	2.06591	down	LincRNAs identified by Cabili et al	410	chr13	-	95157017	95165332	upstream	NM_007084	SOX21	transcription factor SOX-21	1.44381e-06	105.718	up	chr13	-	95361878	95364389
TCONS_00022688	XLOC_010979	0.0442614	3.0967	up	LincRNAs identified by Cabili et al	612	chr14	-	26851402	26866526	upstream	NM_006491	NOVA1	RNA-binding protein Nova-1 isoform 3	0.00622956	3.00853	down	chr14	-	26939323	27066960
TCONS_00023132	XLOC_011074	0.0442614	3.39738	up	LincRNAs identified by Cabili et al	608	chr14	-	74675158	74681460	downstream	NM_025057	C14orf45	uncharacterized protein C14orf45	0.0013954	4.73052	up	chr14	+	74486058	74532796
TCONS_00023132	XLOC_011074	0.00246725	3.39738	up	LincRNAs identified by Cabili et al	608	chr14	-	74675158	74681460	upstream	NM_194279	ISCA2	iron-sulfur cluster assembly 2 homolog, mitochondrial precursor	5.3656e-05	2.09218	up	chr14	+	74960449	74962271
TCONS_00023486	XLOC_011331	0.000514452	2.60293	up	LincRNAs identified by Cabili et al	2143	chr15	+	82391266	82393834	downstream	NM_001008226	FAM154B	protein FAM154B	4.57251e-05	15.7697	up	chr15	+	82555151	82577267
TCONS_00023502	XLOC_011346	0.000514452	2.53758	up	LincRNAs identified by Cabili et al	544	chr15	+	89943394	89981066	downstream	ENST00000268130	WDR93	WD repeat domain 93 [Source:HGNC Symbol;Acc:26924]	0.000252826	2.94506	up	chr15	+	90234027	90286869
TCONS_00023502	XLOC_011346	0.00662413	2.53758	up	LincRNAs identified by Cabili et al	544	chr15	+	89943394	89981066	downstream	NM_003847	PEX11A	peroxisomal membrane protein 11A	0.000447346	2.1298	down	chr15	-	90226286	90233958
TCONS_00023546	XLOC_011379	0.00662413	2.50549	down	LincRNAs identified by Cabili et al	1070	chr15	+	99570737	99574238	downstream	NM_015286	SYNM	synemin isoform B	0.000180569	10.4175	down	chr15	+	99645285	99675800
TCONS_00023546	XLOC_011379	0.00662413	2.50549	down	LincRNAs identified by Cabili et al	1070	chr15	+	99570737	99574238	downstream	NM_145728	SYNM	synemin isoform A	2.82208e-05	9.2369	down	chr15	+	99645285	99675800
TCONS_00023546	XLOC_011379	8.00145e-07	2.50549	down	LincRNAs identified by Cabili et al	1070	chr15	+	99570737	99574238	upstream	NM_001102612	PGPEP1L	pyroglutamyl-peptidase 1-like protein isoform 1	8.54495e-06	4.61829	down	chr15	-	99511458	99548885
TCONS_00023557	XLOC_011384	0.00817763	17.628	down	LincRNAs identified by Cabili et al	3376	chr15	+	100882801	100892843	upstream	NM_139057	ADAMTS17	A disintegrin and metalloproteinase with thrombospondin motifs 17 preproprotein	3.49188e-05	2.9749	down	chr15	-	100511642	100882183
TCONS_00023721	XLOC_011518	0.00104737	2.05254	down	LincRNAs identified by Cabili et al	1002	chr15	-	69752806	69755112	downstream	NM_015554	GLCE	D-glucuronyl C5-epimerase	0.00068706	2.27115	down	chr15	+	69452972	69564544
TCONS_00023877	XLOC_011182	0.00104737	4.08849	down	LincRNAs identified by Cabili et al	275	chr15	+	24992109	24997809	downstream	NM_003097	SNRPN	small nuclear ribonucleoprotein-associated protein N	0.00702615	2.43038	down	chr15	+	25200134	25223729
TCONS_00023877	XLOC_011182	0.00460851	4.08849	down	LincRNAs identified by Cabili et al	275	chr15	+	24992109	24997809	downstream	NM_022804	SNURF	SNRPN upstream reading frame protein	0.0262571	2.92238	down	chr15	+	25200069	25213976
TCONS_00024153	XLOC_011523	3.55295e-05	2.23107	down	LincRNAs identified by Cabili et al	354	chr15	-	72757150	72764042	downstream	NM_001080462	TMEM202	transmembrane protein 202	3.17817e-05	2.11672	up	chr15	+	72690667	72700708
TCONS_00024244	XLOC_011623	0.0426742	2.14548	down	LincRNAs identified by Cabili et al	1840	chr16	+	2693654	2696114	upstream	NM_020705	TBC1D24	TBC1 domain family member 24 isoform 2	0.00120927	2.32923	down	chr16	+	2525146	2555734
TCONS_00024467	XLOC_011789	0.049113	2.62802	up	LincRNAs identified by Cabili et al	3301	chr16	+	74299393	74302955	downstream	NM_001145667	GLG1	Golgi apparatus protein 1 isoform 3 precursor	4.53471e-07	2.0689	down	chr16	-	74481325	74641042
TCONS_00024577	XLOC_011873	0.00158159	2.43321	down	LincRNAs identified by Cabili et al	313	chr16	-	10715084	10716242	downstream	NM_001424	EMP2	epithelial membrane protein 2 precursor	1.38347e-06	3.85462	down	chr16	-	10622278	10674539
TCONS_00024718	XLOC_011999	0.00158159	2.87416	up	LincRNAs identified by Cabili et al	389	chr16	-	71466769	71467279	upstream	ENST00000356272	PHLPP2	PH domain and leucine rich repeat protein phosphatase 2 [Source:HGNC Symbol;Acc:29149]	0.000259661	2.59814	down	chr16	-	71678851	71748704
TCONS_00024718	XLOC_011999	0.00158159	2.87416	up	LincRNAs identified by Cabili et al	389	chr16	-	71466769	71467279	upstream	NM_001017967	MARVELD3	MARVEL domain-containing protein 3 isoform 1	0.0038316	4.16703	up	chr16	+	71660069	71675868
TCONS_00024718	XLOC_011999	0.00158159	2.87416	up	LincRNAs identified by Cabili et al	389	chr16	-	71466769	71467279	upstream	NM_001166395	CHST4	carbohydrate sulfotransferase 4	0.00098581	2.09613	down	chr16	+	71560153	71572493
TCONS_00024718	XLOC_011999	0.00115366	2.87416	up	LincRNAs identified by Cabili et al	389	chr16	-	71466769	71467279	upstream	NM_052858	MARVELD3	MARVEL domain-containing protein 3 isoform 2	1.54474e-05	9.54926	up	chr16	+	71660069	71669233
TCONS_00025221	XLOC_012444	0.00535457	3.45695	up	LincRNAs identified by Cabili et al	2022	chr17	-	33558468	33569346	upstream	NM_001195790	SLFN12L	schlafen family member 12-like	0.0409667	2.57895	up	chr17	-	33801941	33814758
TCONS_00025258	XLOC_012064	1.27093e-05	2.31875	down	LincRNAs identified by Cabili et al	1498	chr17	+	47994	49628	upstream	NM_003585	DOC2B	double C2-like domain-containing protein beta	3.19108e-06	3.67015	down	chr17	-	6010	31420
TCONS_00025345	XLOC_012165	1.27093e-05	4.06357	down	LincRNAs identified by Cabili et al	717	chr17	+	29904908	29912680	upstream	ENST00000394755	EVI2A	ecotropic viral integration site 2A [Source:HGNC Symbol;Acc:3499]	0.00799667	2.4723	up	chr17	-	29643427	29648767
TCONS_00025345	XLOC_012165	0.040577	4.06357	down	LincRNAs identified by Cabili et al	717	chr17	+	29904908	29912680	upstream	NM_006495	EVI2B	protein EVI2B precursor	0.000457494	3.2223	up	chr17	-	29630787	29641130
TCONS_00025355	XLOC_012177	0.040577	2.18283	down	LincRNAs identified by Cabili et al	1090	chr17	+	33640517	33652433	downstream	NM_000286	PEX12	peroxisome assembly protein 12	0.0161652	2.33237	down	chr17	-	33901813	33905656
TCONS_00025355	XLOC_012177	0.040577	2.18283	down	LincRNAs identified by Cabili et al	1090	chr17	+	33640517	33652433	downstream	NM_001195790	SLFN12L	schlafen family member 12-like	0.0409667	2.57895	up	chr17	-	33801941	33814758
TCONS_00025355	XLOC_012177	0.0458761	2.18283	down	LincRNAs identified by Cabili et al	1090	chr17	+	33640517	33652433	downstream	NM_001282	AP2B1	AP-2 complex subunit beta isoform b	0.00122381	2.03513	down	chr17	+	33914281	34053436
TCONS_00025356	XLOC_012177	0.0458761	2.26038	down	LincRNAs identified by Cabili et al	1141	chr17	+	33640547	33652439	downstream	NM_000286	PEX12	peroxisome assembly protein 12	0.0161652	2.33237	down	chr17	-	33901813	33905656
TCONS_00025356	XLOC_012177	0.0458761	2.26038	down	LincRNAs identified by Cabili et al	1141	chr17	+	33640547	33652439	downstream	NM_001195790	SLFN12L	schlafen family member 12-like	0.0409667	2.57895	up	chr17	-	33801941	33814758
TCONS_00025356	XLOC_012177	0.0231304	2.26038	down	LincRNAs identified by Cabili et al	1141	chr17	+	33640547	33652439	downstream	NM_001282	AP2B1	AP-2 complex subunit beta isoform b	0.00122381	2.03513	down	chr17	+	33914281	34053436
TCONS_00025360	XLOC_012177	0.0231304	3.49674	down	LincRNAs identified by Cabili et al	1251	chr17	+	33640552	33652425	downstream	NM_000286	PEX12	peroxisome assembly protein 12	0.0161652	2.33237	down	chr17	-	33901813	33905656
TCONS_00025360	XLOC_012177	0.0231304	3.49674	down	LincRNAs identified by Cabili et al	1251	chr17	+	33640552	33652425	downstream	NM_001195790	SLFN12L	schlafen family member 12-like	0.0409667	2.57895	up	chr17	-	33801941	33814758
TCONS_00025360	XLOC_012177	0.00493121	3.49674	down	LincRNAs identified by Cabili et al	1251	chr17	+	33640552	33652425	downstream	NM_001282	AP2B1	AP-2 complex subunit beta isoform b	0.00122381	2.03513	down	chr17	+	33914281	34053436
TCONS_00025362	XLOC_012177	0.00493121	2.28246	down	LincRNAs identified by Cabili et al	950	chr17	+	33648816	33652433	downstream	NM_000286	PEX12	peroxisome assembly protein 12	0.0161652	2.33237	down	chr17	-	33901813	33905656
TCONS_00025362	XLOC_012177	0.00493121	2.28246	down	LincRNAs identified by Cabili et al	950	chr17	+	33648816	33652433	downstream	NM_001195790	SLFN12L	schlafen family member 12-like	0.0409667	2.57895	up	chr17	-	33801941	33814758
TCONS_00025362	XLOC_012177	1.8263e-05	2.28246	down	LincRNAs identified by Cabili et al	950	chr17	+	33648816	33652433	downstream	NM_001282	AP2B1	AP-2 complex subunit beta isoform b	0.00122381	2.03513	down	chr17	+	33914281	34053436
TCONS_00025791	XLOC_012065	0.0281861	4.32706	down	LincRNAs identified by Cabili et al	309	chr17	+	56208	56601	upstream	NM_003585	DOC2B	double C2-like domain-containing protein beta	3.19108e-06	3.67015	down	chr17	-	6010	31420
TCONS_00025856	XLOC_012131	0.0281861	2.07322	down	LincRNAs identified by Cabili et al	399	chr17	+	18315659	18317702	downstream	NM_001040078	LGALS9C	galectin-9C	0.00492755	2.48441	up	chr17	+	18380098	18398259
TCONS_00025856	XLOC_012131	0.0400885	2.07322	down	LincRNAs identified by Cabili et al	399	chr17	+	18315659	18317702	upstream	NM_017758	ALKBH5	probable alpha-ketoglutarate-dependent dioxygenase ABH5	0.00702167	2.46456	down	chr17	+	18086866	18113267
TCONS_00025897	XLOC_012177	0.0400885	2.83099	down	LincRNAs identified by Cabili et al	990	chr17	+	33643406	33652444	downstream	NM_000286	PEX12	peroxisome assembly protein 12	0.0161652	2.33237	down	chr17	-	33901813	33905656
TCONS_00025897	XLOC_012177	0.0400885	2.83099	down	LincRNAs identified by Cabili et al	990	chr17	+	33643406	33652444	downstream	NM_001195790	SLFN12L	schlafen family member 12-like	0.0409667	2.57895	up	chr17	-	33801941	33814758
TCONS_00025897	XLOC_012177	0.0034128	2.83099	down	LincRNAs identified by Cabili et al	990	chr17	+	33643406	33652444	downstream	NM_001282	AP2B1	AP-2 complex subunit beta isoform b	0.00122381	2.03513	down	chr17	+	33914281	34053436
TCONS_00026160	XLOC_012574	0.0034128	2.488	up	LincRNAs identified by Cabili et al	245	chr17	-	72530813	72534060	downstream	NM_007261	CD300A	CMRF35-like molecule 8 isoform 1 precursor	0.0050378	2.35444	up	chr17	+	72462521	72480937
TCONS_00026160	XLOC_012574	0.0034128	2.488	up	LincRNAs identified by Cabili et al	245	chr17	-	72530813	72534060	downstream	NM_023036	DNAI2	dynein intermediate chain 2, axonemal isoform 1	0.0101027	3.15801	up	chr17	+	72270385	72311023
TCONS_00026160	XLOC_012574	0.0034128	2.488	up	LincRNAs identified by Cabili et al	245	chr17	-	72530813	72534060	upstream	ENST00000330793	CD300C	CD300c molecule [Source:HGNC Symbol;Acc:19320]	0.00272101	2.05813	up	chr17	-	72537246	72542282
TCONS_00026160	XLOC_012574	0.0034128	2.488	up	LincRNAs identified by Cabili et al	245	chr17	-	72530813	72534060	upstream	ENST00000357814	NAT9	N-acetyltransferase 9 (GCN5-related, putative) [Source:HGNC Symbol;Acc:23133]	0.000773268	2.22022	down	chr17	-	72766685	72772470
TCONS_00026160	XLOC_012574	0.000286544	2.488	up	LincRNAs identified by Cabili et al	245	chr17	-	72530813	72534060	upstream	NM_001163990	RAB37	ras-related protein Rab-37 isoform 5	0.0102047	3.47576	up	chr17	+	72733355	72743474
TCONS_00026289	XLOC_012631	0.000286544	3.30736	down	LincRNAs identified by Cabili et al	521	chr18	+	12288321	12291290	downstream	NM_001128626	SPIRE1	protein spire homolog 1 isoform a	8.04993e-06	7.49755	down	chr18	-	12446510	12657912
TCONS_00026289	XLOC_012631	0.00369334	3.30736	down	LincRNAs identified by Cabili et al	521	chr18	+	12288321	12291290	downstream	NM_020148	SPIRE1	protein spire homolog 1 isoform b	0.00241317	2.23459	down	chr18	-	12446510	12657912
TCONS_00026697	XLOC_012798	0.00790095	3.18018	down	LincRNAs identified by Cabili et al	369	chr18	-	25512852	25513932	upstream	NM_001792	CDH2	cadherin-2 preproprotein	0.00739241	4.71162	down	chr18	-	25530929	25757445
TCONS_00026698	XLOC_012798	0.000972122	2.6048	down	LincRNAs identified by Cabili et al	374	chr18	-	25512852	25513932	upstream	NM_001792	CDH2	cadherin-2 preproprotein	0.00739241	4.71162	down	chr18	-	25530929	25757445
TCONS_00026702	XLOC_012810	2.349e-05	5.67356	up	LincRNAs identified by Cabili et al	597	chr18	-	32486954	32493728	downstream	ENST00000399121	DTNA	dystrobrevin, alpha [Source:HGNC Symbol;Acc:3057]	0.000746633	3.20118	down	chr18	+	32398301	32471808
TCONS_00026862	XLOC_012908	2.349e-05	4.14894	down	LincRNAs identified by Cabili et al	3204	chr19	+	781567	786255	downstream	ENST00000333175	C19orf6	chromosome 19 open reading frame 6 [Source:HGNC Symbol;Acc:17039]	0.00036169	2.1143	down	chr19	-	1009649	1021141
TCONS_00026862	XLOC_012908	2.349e-05	4.14894	down	LincRNAs identified by Cabili et al	3204	chr19	+	781567	786255	downstream	NM_005481	MED16	mediator of RNA polymerase II transcription subunit 16	0.00411138	2.90703	down	chr19	-	867961	893218
TCONS_00026862	XLOC_012908	2.349e-05	4.14894	down	LincRNAs identified by Cabili et al	3204	chr19	+	781567	786255	downstream	NM_032551	KISS1R	kiSS-1 receptor	0.013437	2.69478	down	chr19	+	917341	921015
TCONS_00026862	XLOC_012908	0.000115777	4.14894	down	LincRNAs identified by Cabili et al	3204	chr19	+	781567	786255	upstream	ENST00000215582	C19orf21	chromosome 19 open reading frame 21 [Source:HGNC Symbol;Acc:27000]	0.000535212	2.20381	up	chr19	+	751145	764318
TCONS_00026930	XLOC_012991	0.000115777	3.78369	down	LincRNAs identified by Cabili et al	281	chr19	+	18315534	18316371	upstream	NM_002248	KCNN1	small conductance calcium-activated potassium channel protein 1	0.0311408	2.25788	up	chr19	+	18062110	18109930
TCONS_00026930	XLOC_012991	0.000115777	3.78369	down	LincRNAs identified by Cabili et al	281	chr19	+	18315534	18316371	upstream	NM_005027	PIK3R2	phosphatidylinositol 3-kinase regulatory subunit beta	0.00260676	2.14563	down	chr19	+	18264015	18281343
TCONS_00026930	XLOC_012991	6.70596e-06	3.78369	down	LincRNAs identified by Cabili et al	281	chr19	+	18315534	18316371	upstream	NM_015683	ARRDC2	arrestin domain-containing protein 2 isoform 1	0.00809806	3.62327	down	chr19	+	18118976	18124911
TCONS_00027001	XLOC_013049	6.70596e-06	4.40603	up	LincRNAs identified by Cabili et al	483	chr19	+	35695954	35706795	downstream	ENST00000447113	DMKN	dermokine [Source:HGNC Symbol;Acc:25063]	0.000395666	5.90167	down	chr19	-	35994205	36004560
TCONS_00027001	XLOC_013049	6.70596e-06	4.40603	up	LincRNAs identified by Cabili et al	483	chr19	+	35695954	35706795	downstream	NM_001126056	DMKN	dermokine isoform 3 precursor	0.000104198	3.6668	down	chr19	-	35988118	36004560
TCONS_00027001	XLOC_013049	6.70596e-06	4.40603	up	LincRNAs identified by Cabili et al	483	chr19	+	35695954	35706795	downstream	NM_001185099	CD22	B-cell receptor CD22 isoform 2 precursor	0.0226044	2.68215	up	chr19	+	35820071	35838264
TCONS_00027001	XLOC_013049	6.70596e-06	4.40603	up	LincRNAs identified by Cabili et al	483	chr19	+	35695954	35706795	downstream	NM_005306	FFAR2	free fatty acid receptor 2	0.00632816	8.59094	up	chr19	+	35940616	35942669
TCONS_00027001	XLOC_013049	6.70596e-06	4.40603	up	LincRNAs identified by Cabili et al	483	chr19	+	35695954	35706795	upstream	ENST00000406242	FXYD3	FXYD domain containing ion transport regulator 3 [Source:HGNC Symbol;Acc:4027]	0.00629368	2.7924	up	chr19	+	35606731	35614107
TCONS_00027001	XLOC_013049	6.70596e-06	4.40603	up	LincRNAs identified by Cabili et al	483	chr19	+	35695954	35706795	upstream	ENST00000455515	FXYD1	FXYD domain containing ion transport regulator 1 [Source:HGNC Symbol;Acc:4025]	0.000201109	2.83872	down	chr19	+	35630391	35633954
TCONS_00027001	XLOC_013049	6.70596e-06	4.40603	up	LincRNAs identified by Cabili et al	483	chr19	+	35695954	35706795	upstream	NM_001037	SCN1B	sodium channel subunit beta-1 isoform a precursor	0.000218156	7.99875	down	chr19	+	35521591	35531353
TCONS_00027001	XLOC_013049	6.70596e-06	4.40603	up	LincRNAs identified by Cabili et al	483	chr19	+	35695954	35706795	upstream	NM_001136007	FXYD3	FXYD domain-containing ion transport regulator 3 isoform 3	0.00191742	2.71757	up	chr19	+	35606731	35615228
TCONS_00027001	XLOC_013049	6.70596e-06	4.40603	up	LincRNAs identified by Cabili et al	483	chr19	+	35695954	35706795	upstream	NM_001136012	FXYD3	FXYD domain-containing ion transport regulator 3 isoform 2 precursor	8.18801e-05	11.9911	up	chr19	+	35606731	35615228
TCONS_00027001	XLOC_013049	6.70596e-06	4.40603	up	LincRNAs identified by Cabili et al	483	chr19	+	35695954	35706795	upstream	NM_002151	HPN	serine protease hepsin	2.94454e-05	3.5706	down	chr19	+	35531409	35557477
TCONS_00027001	XLOC_013049	0.000255264	4.40603	up	LincRNAs identified by Cabili et al	483	chr19	+	35695954	35706795	upstream	NM_005971	FXYD3	FXYD domain-containing ion transport regulator 3 isoform 1 precursor	6.31704e-05	15.7395	up	chr19	+	35606731	35615228
TCONS_00027153	XLOC_013194	0.000255264	3.29563	down	LincRNAs identified by Cabili et al	489	chr19	-	781013	789792	downstream	ENST00000215582	C19orf21	chromosome 19 open reading frame 21 [Source:HGNC Symbol;Acc:27000]	0.000535212	2.20381	up	chr19	+	751145	764318
TCONS_00027153	XLOC_013194	0.000255264	3.29563	down	LincRNAs identified by Cabili et al	489	chr19	-	781013	789792	upstream	ENST00000333175	C19orf6	chromosome 19 open reading frame 6 [Source:HGNC Symbol;Acc:17039]	0.00036169	2.1143	down	chr19	-	1009649	1021141
TCONS_00027153	XLOC_013194	0.000255264	3.29563	down	LincRNAs identified by Cabili et al	489	chr19	-	781013	789792	upstream	NM_005481	MED16	mediator of RNA polymerase II transcription subunit 16	0.00411138	2.90703	down	chr19	-	867961	893218
TCONS_00027153	XLOC_013194	0.0497534	3.29563	down	LincRNAs identified by Cabili et al	489	chr19	-	781013	789792	upstream	NM_032551	KISS1R	kiSS-1 receptor	0.013437	2.69478	down	chr19	+	917341	921015
TCONS_00027178	XLOC_013218	0.0497534	3.04549	up	LincRNAs identified by Cabili et al	415	chr19	-	9944973	9945573	downstream	NM_024106	ZNF426	zinc finger protein 426	0.0339071	2.83228	down	chr19	-	9638680	9649303
TCONS_00027178	XLOC_013218	1.19386e-07	3.04549	up	LincRNAs identified by Cabili et al	415	chr19	-	9944973	9945573	upstream	NM_058164	OLFM2	noelin-2 precursor	7.26384e-08	2.32815	down	chr19	-	9964393	10047070
TCONS_00027183	XLOC_013222	1.19386e-07	2.33207	down	LincRNAs identified by Cabili et al	1895	chr19	-	10762540	10764556	downstream	ENST00000335757	SLC44A2	solute carrier family 44, member 2 [Source:HGNC Symbol;Acc:17292]	0.00926019	2.34822	down	chr19	+	10736170	10755235
TCONS_00027183	XLOC_013222	1.19386e-07	2.33207	down	LincRNAs identified by Cabili et al	1895	chr19	-	10762540	10764556	downstream	NM_032885	ATG4D	cysteine protease ATG4D	0.00784204	2.27961	down	chr19	+	10654646	10664094
TCONS_00027183	XLOC_013222	1.19386e-07	2.33207	down	LincRNAs identified by Cabili et al	1895	chr19	-	10762540	10764556	upstream	ENST00000397820	C19orf38	chromosome 19 open reading frame 38 [Source:HGNC Symbol;Acc:34073]	0.0418639	2.51262	up	chr19	+	10959105	10980360
TCONS_00027183	XLOC_013222	1.02188e-06	2.33207	down	LincRNAs identified by Cabili et al	1895	chr19	-	10762540	10764556	upstream	NM_024029	YIPF2	protein YIPF2	0.00787726	2.30032	down	chr19	-	11033443	11039357
TCONS_00027184	XLOC_013222	1.02188e-06	3.17785	down	LincRNAs identified by Cabili et al	1551	chr19	-	10762549	10764550	downstream	ENST00000335757	SLC44A2	solute carrier family 44, member 2 [Source:HGNC Symbol;Acc:17292]	0.00926019	2.34822	down	chr19	+	10736170	10755235
TCONS_00027184	XLOC_013222	1.02188e-06	3.17785	down	LincRNAs identified by Cabili et al	1551	chr19	-	10762549	10764550	downstream	NM_032885	ATG4D	cysteine protease ATG4D	0.00784204	2.27961	down	chr19	+	10654646	10664094
TCONS_00027184	XLOC_013222	1.02188e-06	3.17785	down	LincRNAs identified by Cabili et al	1551	chr19	-	10762549	10764550	upstream	ENST00000397820	C19orf38	chromosome 19 open reading frame 38 [Source:HGNC Symbol;Acc:34073]	0.0418639	2.51262	up	chr19	+	10959105	10980360
TCONS_00027184	XLOC_013222	6.67601e-08	3.17785	down	LincRNAs identified by Cabili et al	1551	chr19	-	10762549	10764550	upstream	NM_024029	YIPF2	protein YIPF2	0.00787726	2.30032	down	chr19	-	11033443	11039357
TCONS_00027384	XLOC_013368	6.67601e-08	4.85409	up	LincRNAs identified by Cabili et al	3760	chr19	-	47137990	47142802	downstream	NM_001103149	PNMAL1	PNMA-like protein 1 isoform b	0.00116738	4.92369	up	chr19	-	46969747	46974820
TCONS_00027384	XLOC_013368	6.67601e-08	4.85409	up	LincRNAs identified by Cabili et al	3760	chr19	-	47137990	47142802	downstream	NM_018215	PNMAL1	PNMA-like protein 1 isoform a	0.00799414	2.92463	down	chr19	-	46969747	46974820
TCONS_00027384	XLOC_013368	0.000959877	4.85409	up	LincRNAs identified by Cabili et al	3760	chr19	-	47137990	47142802	downstream	NM_032040	CCDC8	coiled-coil domain-containing protein 8	1.57932e-05	2.48615	down	chr19	-	46913585	46916919
TCONS_00027643	XLOC_013182	6.49816e-06	2.70234	up	LincRNAs identified by Cabili et al	460	chr19	+	58787664	58788877	upstream	NM_007134	ZNF135	zinc finger protein 135 isoform 1	0.0102169	2.29582	down	chr19	+	58570606	58581110
TCONS_00027673	XLOC_013222	6.49816e-06	2.53755	down	LincRNAs identified by Cabili et al	1849	chr19	-	10762494	10764553	downstream	ENST00000335757	SLC44A2	solute carrier family 44, member 2 [Source:HGNC Symbol;Acc:17292]	0.00926019	2.34822	down	chr19	+	10736170	10755235
TCONS_00027673	XLOC_013222	6.49816e-06	2.53755	down	LincRNAs identified by Cabili et al	1849	chr19	-	10762494	10764553	downstream	NM_032885	ATG4D	cysteine protease ATG4D	0.00784204	2.27961	down	chr19	+	10654646	10664094
TCONS_00027673	XLOC_013222	6.49816e-06	2.53755	down	LincRNAs identified by Cabili et al	1849	chr19	-	10762494	10764553	upstream	ENST00000397820	C19orf38	chromosome 19 open reading frame 38 [Source:HGNC Symbol;Acc:34073]	0.0418639	2.51262	up	chr19	+	10959105	10980360
TCONS_00027673	XLOC_013222	4.30821e-07	2.53755	down	LincRNAs identified by Cabili et al	1849	chr19	-	10762494	10764553	upstream	NM_024029	YIPF2	protein YIPF2	0.00787726	2.30032	down	chr19	-	11033443	11039357
TCONS_00028090	XLOC_013434	4.84172e-05	11.2581	down	LincRNAs identified by Cabili et al	1490	chr20	+	1810674	1816693	upstream	NM_001135844	SIRPB1	signal-regulatory protein beta-1 isoform 3 precursor	0.00737821	2.212	up	chr20	-	1577985	1600689
TCONS_00028173	XLOC_013531	4.84172e-05	5.65037	up	LincRNAs identified by Cabili et al	249	chr20	+	43808763	43816966	downstream	NM_001184728	PIGT	GPI transamidase component PIG-T isoform 2 precursor	0.000936078	2.53543	down	chr20	+	44044706	44054885
TCONS_00028173	XLOC_013531	4.84172e-05	5.65037	up	LincRNAs identified by Cabili et al	249	chr20	+	43808763	43816966	downstream	NM_001184729	PIGT	GPI transamidase component PIG-T isoform 3 precursor	0.000157369	2.31879	down	chr20	+	44044706	44054885
TCONS_00028173	XLOC_013531	4.84172e-05	5.65037	up	LincRNAs identified by Cabili et al	249	chr20	+	43808763	43816966	downstream	NM_001184730	PIGT	GPI transamidase component PIG-T isoform 4 precursor	0.000216195	2.9576	down	chr20	+	44044706	44054885
TCONS_00028173	XLOC_013531	4.84172e-05	5.65037	up	LincRNAs identified by Cabili et al	249	chr20	+	43808763	43816966	downstream	NM_015937	PIGT	GPI transamidase component PIG-T isoform 1 precursor	0.00118629	2.21221	down	chr20	+	44044706	44054885
TCONS_00028173	XLOC_013531	0.0134082	5.65037	up	LincRNAs identified by Cabili et al	249	chr20	+	43808763	43816966	upstream	NM_002638	PI3	elafin preproprotein	0.00243276	16.3404	up	chr20	+	43803539	43805185
TCONS_00028266	XLOC_013612	0.0134082	5.00958	up	LincRNAs identified by Cabili et al	3322	chr20	+	62030713	62034595	downstream	NM_001958	EEF1A2	elongation factor 1-alpha 2	9.361e-10	8.81138	down	chr20	-	62119364	62130668
TCONS_00028266	XLOC_013612	0.0134082	5.00958	up	LincRNAs identified by Cabili et al	3322	chr20	+	62030713	62034595	downstream	NM_012384	GMEB2	glucocorticoid modulatory element-binding protein 2	0.023218	2.34665	down	chr20	-	62218954	62258381
TCONS_00028266	XLOC_013612	0.0134082	5.00958	up	LincRNAs identified by Cabili et al	3322	chr20	+	62030713	62034595	upstream	ENST00000358894	COL20A1	collagen, type XX, alpha 1 [Source:HGNC Symbol;Acc:14670]	0.000176248	3.19053	down	chr20	+	61924537	61962285
TCONS_00028266	XLOC_013612	0.0134082	5.00958	up	LincRNAs identified by Cabili et al	3322	chr20	+	62030713	62034595	upstream	NM_018209	ARFGAP1	ADP-ribosylation factor GTPase-activating protein 1 isoform a	0.0195093	2.90237	down	chr20	+	61904164	61921142
TCONS_00028266	XLOC_013612	0.0088984	5.00958	up	LincRNAs identified by Cabili et al	3322	chr20	+	62030713	62034595	upstream	NM_175609	ARFGAP1	ADP-ribosylation factor GTPase-activating protein 1 isoform b	0.0196572	2.49277	down	chr20	+	61904164	61921142
TCONS_00028268	XLOC_013612	0.0088984	4.5306	up	LincRNAs identified by Cabili et al	1268	chr20	+	62033152	62034595	downstream	NM_001958	EEF1A2	elongation factor 1-alpha 2	9.361e-10	8.81138	down	chr20	-	62119364	62130668
TCONS_00028268	XLOC_013612	0.0088984	4.5306	up	LincRNAs identified by Cabili et al	1268	chr20	+	62033152	62034595	downstream	NM_012384	GMEB2	glucocorticoid modulatory element-binding protein 2	0.023218	2.34665	down	chr20	-	62218954	62258381
TCONS_00028268	XLOC_013612	0.0088984	4.5306	up	LincRNAs identified by Cabili et al	1268	chr20	+	62033152	62034595	upstream	ENST00000358894	COL20A1	collagen, type XX, alpha 1 [Source:HGNC Symbol;Acc:14670]	0.000176248	3.19053	down	chr20	+	61924537	61962285
TCONS_00028268	XLOC_013612	0.0088984	4.5306	up	LincRNAs identified by Cabili et al	1268	chr20	+	62033152	62034595	upstream	NM_018209	ARFGAP1	ADP-ribosylation factor GTPase-activating protein 1 isoform a	0.0195093	2.90237	down	chr20	+	61904164	61921142
TCONS_00028268	XLOC_013612	0.00335133	4.5306	up	LincRNAs identified by Cabili et al	1268	chr20	+	62033152	62034595	upstream	NM_175609	ARFGAP1	ADP-ribosylation factor GTPase-activating protein 1 isoform b	0.0196572	2.49277	down	chr20	+	61904164	61921142
TCONS_00028641	XLOC_013690	0.00335133	2.02986	down	LincRNAs identified by Cabili et al	1176	chr20	-	23168343	23169661	downstream	NM_012072	CD93	complement component C1q receptor precursor	0.000739628	2.1928	up	chr20	-	23059992	23066977
TCONS_00028641	XLOC_013690	1.36908e-06	2.02986	down	LincRNAs identified by Cabili et al	1176	chr20	-	23168343	23169661	upstream	NM_022482	GZF1	GDNF-inducible zinc finger protein 1	0.00734551	2.62124	down	chr20	+	23345020	23353683
TCONS_00028993	XLOC_013911	3.00771e-06	3.48662	down	LincRNAs identified by Cabili et al	220	chr21	+	32996943	32997467	downstream	ENST00000270112	HUNK	hormonally up-regulated Neu-associated kinase [Source:HGNC Symbol;Acc:13326]	0.000425847	6.68983	down	chr21	+	33245627	33376377
TCONS_00029027	XLOC_013950	3.96328e-06	4.84583	down	LincRNAs identified by Cabili et al	1607	chr21	+	43188148	43196304	downstream	NM_199050	C2CD2	C2 domain-containing protein 2 isoform 2	0.00274895	5.34553	down	chr21	-	43305218	43346799
TCONS_00029225	XLOC_013950	0.00735829	4.7353	down	LincRNAs identified by Cabili et al	370	chr21	+	43194023	43194997	downstream	NM_199050	C2CD2	C2 domain-containing protein 2 isoform 2	0.00274895	5.34553	down	chr21	-	43305218	43346799
TCONS_00029677	XLOC_014347	1.76356e-06	2.47812	down	LincRNAs identified by Cabili et al	534	chr22	-	32510920	32517633	downstream	NM_003405	YWHAH	14-3-3 protein eta	5.1875e-06	2.49796	down	chr22	+	32340478	32353590
TCONS_00029721	XLOC_014397	1.76356e-06	4.02159	down	LincRNAs identified by Cabili et al	256	chr22	-	45894163	45894662	downstream	NM_001167574	UPK3A	uroplakin-3a isoform 2 precursor	3.21682e-06	2.04267	down	chr22	+	45680867	45691755
TCONS_00029721	XLOC_014397	1.76356e-06	4.02159	down	LincRNAs identified by Cabili et al	256	chr22	-	45894163	45894662	downstream	NM_006953	UPK3A	uroplakin-3a isoform 1 precursor	0.0284281	2.14539	down	chr22	+	45680867	45691755
TCONS_00029721	XLOC_014397	1.76356e-06	4.02159	down	LincRNAs identified by Cabili et al	256	chr22	-	45894163	45894662	downstream	NM_015653	RIBC2	RIB43A-like with coiled-coils protein 2	0.0141531	8.14985	up	chr22	+	45809573	45828295
TCONS_00029721	XLOC_014397		4.02159	down	LincRNAs identified by Cabili et al	256	chr22	-	45894163	45894662	upstream	NM_006485	FBLN1	fibulin-1 isoform B precursor	0.000278503	2.82127	down	chr22	+	45898718	45961581
