# Supplementary material for: LncRNA and mRNA expression profiles reveal the potential roles of lncRNA contributing to regulating dural penetration in clival chordoma
Source: Aging (Albany NY). 2020 Jun 13;12(11):10809–26. doi: 10.18632/aging.103294 (PMC7346080; doi:10.18632/aging.103294)
Supplement: Supplementary Table 7 [file aging-12-103294-s005..xls]

## Sheet: No-DP vs_Serious-DP
Table S7 Enhancer lncRNAs nearby coding gene data
Seqname	GeneSymbol	P-value LncRNAs	Fold change LncRNAs	Regulation LncRNAs	Source	RNA length	Chrom	Strand	txStart	txEnd	Genome Relationship	NearbyGene	NearbyGene Symbol	NearbyProtein Name	P-value mRNAs	Fold change mRNAs	Regulation mRNAs	NearbyGene Chrom	NearbyGene Strand	NearbyGene txStart	NearbyGene txEnd
ENST00000313156	AC004840.9	2.597e-10	4.51653	down	GENCODE	2067	chr7	+	2477397	2487485	downstream	NM_007353	GNA12	guanine nucleotide-binding protein subunit alpha-12	0.00477247	2.33883	down	chr7	-	2767740	2883959
ENST00000313156	AC004840.9	2.597e-10	4.51653	down	GENCODE	2067	chr7	+	2477397	2487485	downstream	NM_025250	TTYH3	protein tweety homolog 3	8.60784e-05	2.13403	down	chr7	+	2671602	2704436
ENST00000366188	RP11-370F5.4	0.000104066	3.21006	down	GENCODE	410	chr9	+	95909321	95910838	upstream	ENST00000375446	NINJ1	ninjurin 1 [Source:HGNC Symbol;Acc:7824]	0.00265437	2.44248	down	chr9	-	95883770	95896570
ENST00000367276	LINC00475	4.94835e-05	4.30572	down	GENCODE	738	chr9	+	94903579	94910588	downstream	NM_005014	OMD	osteomodulin precursor	8.6172e-09	3.79222	down	chr9	-	95176526	95186836
ENST00000367276	LINC00475	4.94835e-05	4.30572	down	GENCODE	738	chr9	+	94903579	94910588	downstream	NM_013417	IARS	isoleucine--tRNA ligase, cytoplasmic	0.00377023	2.27405	down	chr9	-	94972624	95055972
ENST00000369027	RP11-10J18.3	0.0347801	2.01033	down	GENCODE	266	chr9	+	127277216	127278335	downstream	NM_182487	OLFML2A	olfactomedin-like protein 2A precursor	0.000142515	9.63467	down	chr9	+	127539436	127577159
ENST00000376445	RP13-401N8.1	6.65349e-06	5.8151	down	GENCODE	320	chr20	+	25731853	25733397	upstream	NM_025176	NINL	ninein-like protein	1.58345e-06	2.16653	down	chr20	-	25433337	25566153
ENST00000377469	AC104135.3	7e-13	10.3592	down	GENCODE	3662	chr2	+	75155365	75160151	downstream	NM_001058	TACR1	substance-P receptor isoform long	0.0345114	2.66558	down	chr2	-	75273589	75426645
ENST00000411479	AC005162.5	0.000264237	9.34512	down	GENCODE	578	chr7	+	29026643	29028515	downstream	NM_004067	CHN2	beta-chimaerin isoform 2	0.00128132	2.5155	up	chr7	+	29234120	29553944
ENST00000411479	AC005162.5	0.000264237	9.34512	down	GENCODE	578	chr7	+	29026643	29028515	upstream	NM_014817	TRIL	TLR4 interactor with leucine rich repeats precursor	0.0195977	6.06242	down	chr7	-	28992973	28998029
ENST00000411599	RP11-254K3.1	4e-13	19.9269	down	GENCODE	479	chr10	+	121940741	121968507	downstream	ENST00000398250	PPAPDC1A	phosphatidic acid phosphatase type 2 domain containing 1A [Source:HGNC Symbol;Acc:23531]	0.00101988	2.81987	down	chr10	+	122216465	122349367
ENST00000411844	KIAA0664L3	0.021398	2.3707	down	GENCODE	582	chr16	+	31715600	31717339	downstream	NM_003414	ZNF267	zinc finger protein 267 isoform 1	0.00669891	2.1464	up	chr16	+	31885078	31928629
ENST00000411844	KIAA0664L3	0.021398	2.3707	down	GENCODE	582	chr16	+	31715600	31717339	upstream	NM_022744	C16orf58	UPF0420 protein C16orf58	0.000388542	2.25914	down	chr16	-	31500812	31519706
ENST00000412060	Z83851.1	1.44866e-05	5.5895	up	GENCODE	475	chr22	-	42760407	42765214	upstream	ENST00000327678	SERHL2	serine hydrolase-like 2 [Source:HGNC Symbol;Acc:29446]	0.00276289	2.23662	down	chr22	+	42949924	42970388
ENST00000412060	Z83851.1	1.44866e-05	5.5895	up	GENCODE	475	chr22	-	42760407	42765214	upstream	NM_001171660	CYB5R3	NADH-cytochrome b5 reductase 3 isoform 3	1.998e-09	2.1602	down	chr22	-	43013845	43040640
ENST00000412060	Z83851.1	1.44866e-05	5.5895	up	GENCODE	475	chr22	-	42760407	42765214	upstream	NM_145912	NFAM1	NFAT activation molecule 1 precursor	0.000874722	2.53433	up	chr22	-	42776413	42828401
ENST00000412422	RP4-562J12.2	1.36138e-05	4.32568	down	GENCODE	2290	chrX	+	117973518	117991849	downstream	NM_024778	LONRF3	LON peptidase N-terminal domain and RING finger protein 3 isoform 2	0.017814	2.04768	down	chrX	+	118108712	118151949
ENST00000412422	RP4-562J12.2	1.36138e-05	4.32568	down	GENCODE	2290	chrX	+	117973518	117991849	upstream	NM_144658	DOCK11	dedicator of cytokinesis protein 11	0.00844886	2.49459	down	chrX	+	117629871	117820123
ENST00000412772	RP11-134P9.3	6.41985e-08	4.14799	up	GENCODE	775	chr1	+	203256279	203257929	downstream	NM_002023	FMOD	fibromodulin precursor	0.000228004	5.13083	down	chr1	-	203309751	203320289
ENST00000412772	RP11-134P9.3	6.41985e-08	4.14799	up	GENCODE	775	chr1	+	203256279	203257929	downstream	NM_201348	PRELP	prolargin precursor	0.000345923	6.9138	down	chr1	+	203444882	203460479
ENST00000412772	RP11-134P9.3	6.41985e-08	4.14799	up	GENCODE	775	chr1	+	203256279	203257929	upstream	NM_003465	CHIT1	chitotriosidase-1 isoform 1 precursor	0.000441012	9.13002	down	chr1	-	203185206	203198860
ENST00000414513	CD99P1	2.92373e-07	11.2058	down	GENCODE	3071	chrX	+	2534659	2556735	downstream	NM_001079855	GYG2	glycogenin-2 isoform a	8.07009e-07	2.93449	down	chrX	+	2746862	2800861
ENST00000414513	CD99P1	2.92373e-07	11.2058	down	GENCODE	3071	chrX	+	2534659	2556735	downstream	NM_001141919	XG	glycoprotein Xg isoform 2 precursor	5.29803e-05	2.72516	up	chrX	+	2670092	2734541
ENST00000414513	CD99P1	2.92373e-07	11.2058	down	GENCODE	3071	chrX	+	2534659	2556735	downstream	NM_001184703	GYG2	glycogenin-2 isoform d	3.06896e-05	2.44651	down	chrX	+	2746862	2800861
ENST00000414513	CD99P1	2.92373e-07	11.2058	down	GENCODE	3071	chrX	+	2534659	2556735	downstream	NM_002414	CD99	CD99 antigen isoform a precursor	0.00194195	3.07114	down	chrX	+	2609227	2659350
ENST00000414513	CD99P1	2.92373e-07	11.2058	down	GENCODE	3071	chrX	+	2534659	2556735	downstream	NM_003918	GYG2	glycogenin-2 isoform b	1.09066e-05	2.74474	down	chrX	+	2746862	2800861
ENST00000416438	LINC00475	0.00461276	3.8444	down	GENCODE	2000	chr9	+	94903748	94921890	downstream	NM_005014	OMD	osteomodulin precursor	8.6172e-09	3.79222	down	chr9	-	95176526	95186836
ENST00000416438	LINC00475	0.00461276	3.8444	down	GENCODE	2000	chr9	+	94903748	94921890	downstream	NM_013417	IARS	isoleucine--tRNA ligase, cytoplasmic	0.00377023	2.27405	down	chr9	-	94972624	95055972
ENST00000416473	RP11-439K3.1	1.78741e-05	2.71207	down	GENCODE	444	chr9	+	85834245	85849157	downstream	NM_174938	FRMD3	FERM domain-containing protein 3 isoform 1	2.01788e-05	4.14328	down	chr9	-	85859538	86153348
ENST00000416473	RP11-439K3.1	1.78741e-05	2.71207	down	GENCODE	444	chr9	+	85834245	85849157	upstream	NM_152573	RASEF	ras and EF-hand domain-containing protein	6.31683e-07	7.76813	down	chr9	-	85597316	85678043
ENST00000416861	AC009502.4	0.0161396	13.9005	up	GENCODE	496	chr2	+	220551708	220579408	upstream	NM_002191	INHA	inhibin alpha chain preproprotein	0.00266569	2.60524	down	chr2	+	220436953	220440435
ENST00000417264	RP11-533K9.2	0.000720044	4.8925	down	GENCODE	155	chr9	+	97247981	97250077	downstream	NM_032823	C9orf3	aminopeptidase O isoform 2	0.0234013	2.153	down	chr9	+	97488950	97849500
ENST00000417460	AC003986.7	5.74953e-06	6.66346	down	GENCODE	692	chr7	+	19159555	19161539	upstream	NM_178425	HDAC9	histone deacetylase 9 isoform 5	0.00029996	2.01852	up	chr7	+	18535884	19036992
ENST00000417479	RP3-428L16.1	5.02333e-05	7.48333	down	GENCODE	573	chr6	+	161352111	161390803	downstream	NM_006724	MAP3K4	mitogen-activated protein kinase kinase kinase 4 isoform b	1.13077e-07	2.94964	down	chr6	+	161412821	161538417
ENST00000417983	LINC00475	0.00237726	3.18676	down	GENCODE	703	chr9	+	94903720	94910588	downstream	NM_005014	OMD	osteomodulin precursor	8.6172e-09	3.79222	down	chr9	-	95176526	95186836
ENST00000417983	LINC00475	0.00237726	3.18676	down	GENCODE	703	chr9	+	94903720	94910588	downstream	NM_013417	IARS	isoleucine--tRNA ligase, cytoplasmic	0.00377023	2.27405	down	chr9	-	94972624	95055972
ENST00000418204	AC104135.3	3.48924e-07	7.19412	down	GENCODE	441	chr2	+	75158554	75165545	downstream	NM_001058	TACR1	substance-P receptor isoform long	0.0345114	2.66558	down	chr2	-	75273589	75426645
ENST00000418953	RP13-30A9.2	7.56054e-05	10.5178	down	GENCODE	461	chr20	+	61265123	61267214	downstream	ENST00000217159	SLCO4A1	solute carrier organic anion transporter family, member 4A1 [Source:HGNC Symbol;Acc:10953]	0.00694644	4.08736	down	chr20	+	61273796	61303647
ENST00000418953	RP13-30A9.2	7.56054e-05	10.5178	down	GENCODE	461	chr20	+	61265123	61267214	downstream	ENST00000343916	COL9A3	collagen, type IX, alpha 3 [Source:HGNC Symbol;Acc:2219]	3.38095e-05	4.81244	down	chr20	+	61448413	61472511
ENST00000418953	RP13-30A9.2	7.56054e-05	10.5178	down	GENCODE	461	chr20	+	61265123	61267214	downstream	NM_033081	DIDO1	death-inducer obliterator 1 isoform c	2.74623e-08	3.99954	down	chr20	-	61509089	61569304
ENST00000418953	RP13-30A9.2	7.56054e-05	10.5178	down	GENCODE	461	chr20	+	61265123	61267214	downstream	NM_080750	DPH3P1	putative DPH3 homolog B	0.000166167	4.84499	up	chr20	+	61476475	61477543
ENST00000418953	RP13-30A9.2	7.56054e-05	10.5178	down	GENCODE	461	chr20	+	61265123	61267214	downstream	NM_080797	DIDO1	death-inducer obliterator 1 isoform b	0.0141356	2.45827	down	chr20	-	61518566	61569304
ENST00000418953	RP13-30A9.2	7.56054e-05	10.5178	down	GENCODE	461	chr20	+	61265123	61267214	upstream	NM_031215	CABLES2	CDK5 and ABL1 enzyme substrate 2	0.00310693	2.2516	down	chr20	-	60963685	60982339
ENST00000419028	AC141930.2	0.000332522	2.35139	down	GENCODE	555	chr2	-	1576325	1584083	downstream	NM_018968	SNTG2	gamma-2-syntrophin	0.0465456	2.86506	up	chr2	+	946553	1371384
ENST00000419028	AC141930.2	0.000332522	2.35139	down	GENCODE	555	chr2	-	1576325	1584083	upstream	NM_012293	PXDN	peroxidasin homolog precursor	0.0496264	3.4912	down	chr2	-	1635658	1748291
ENST00000419620	RP11-332M4.1	6.4605e-08	17.3628	down	GENCODE	395	chr9	-	98361826	98368568	downstream	NM_000136	FANCC	Fanconi anemia group C protein isoform a	1.10386e-06	2.83108	down	chr9	-	97861335	98079991
ENST00000419620	RP11-332M4.1	6.4605e-08	17.3628	down	GENCODE	395	chr9	-	98361826	98368568	downstream	NM_000264	PTCH1	protein patched homolog 1 isoform L	1.77901e-05	5.79927	down	chr9	-	98205263	98270831
ENST00000419620	RP11-332M4.1	6.4605e-08	17.3628	down	GENCODE	395	chr9	-	98361826	98368568	downstream	NM_001083602	PTCH1	protein patched homolog 1 isoform M	0.000722871	6.11793	down	chr9	-	98205263	98279247
ENST00000419620	RP11-332M4.1	6.4605e-08	17.3628	down	GENCODE	395	chr9	-	98361826	98368568	downstream	NM_001083603	PTCH1	protein patched homolog 1 isoform L'	2.68617e-06	4.66844	down	chr9	-	98205263	98279247
ENST00000419620	RP11-332M4.1	6.4605e-08	17.3628	down	GENCODE	395	chr9	-	98361826	98368568	downstream	NM_001083607	PTCH1	protein patched homolog 1 isoform S	1.71563e-05	3.15252	down	chr9	-	98205263	98269481
ENST00000419931	RP11-445H22.4	0.00107066	2.61293	down	GENCODE	514	chr20	-	43323716	43324725	downstream	NM_024331	TTPAL	alpha-tocopherol transfer protein-like isoform 1	0.00299832	3.22293	down	chr20	+	43104525	43123244
ENST00000419931	RP11-445H22.4	0.00107066	2.61293	down	GENCODE	514	chr20	-	43323716	43324725	upstream	NM_003881	WISP2	WNT1-inducible-signaling pathway protein 2 precursor	6.6952e-06	10.3423	down	chr20	+	43343884	43356452
ENST00000419931	RP11-445H22.4	0.00107066	2.61293	down	GENCODE	514	chr20	-	43323716	43324725	upstream	NM_022358	KCNK15	potassium channel subfamily K member 15 precursor	0.000920043	3.15835	down	chr20	+	43374487	43380954
ENST00000420406	RP4-740C4.4	0.0176074	3.42952	up	GENCODE	371	chr1	+	2357418	2362089	downstream	NM_152371	FAM213B	prostamide/prostaglandin F synthase isoform b	2.08328e-05	2.04887	up	chr1	+	2518188	2522908
ENST00000420406	RP4-740C4.4	0.0176074	3.42952	up	GENCODE	371	chr1	+	2357418	2362089	upstream	NM_003036	SKI	ski oncogene	0.00408583	2.20484	down	chr1	+	2160133	2241652
ENST00000420912	AC004947.2	1.2782e-09	6.30733	down	GENCODE	2781	chr7	+	26591440	26596819	downstream	NM_003930	SKAP2	src kinase-associated phosphoprotein 2	0.0169765	2.04172	up	chr7	-	26706687	26904341
ENST00000420956	LINC00413	0.0126161	2.26169	down	GENCODE	518	chr13	+	78236634	78237275	upstream	NM_001160706	SCEL	sciellin isoform 3	2.71552e-07	8.7677	down	chr13	+	78109808	78219398
ENST00000420956	LINC00413	0.0126161	2.26169	down	GENCODE	518	chr13	+	78236634	78237275	upstream	NM_003843	SCEL	sciellin isoform 2	3.6336e-09	17.0985	down	chr13	+	78109808	78219398
ENST00000420956	LINC00413	0.0126161	2.26169	down	GENCODE	518	chr13	+	78236634	78237275	upstream	NM_144777	SCEL	sciellin isoform 1	1.78277e-05	6.7176	down	chr13	+	78109808	78219398
ENST00000421234	LINC00475	0.000164452	3.65612	down	GENCODE	467	chr9	+	94909873	94910588	downstream	NM_005014	OMD	osteomodulin precursor	8.6172e-09	3.79222	down	chr9	-	95176526	95186836
ENST00000421234	LINC00475	0.000164452	3.65612	down	GENCODE	467	chr9	+	94909873	94910588	downstream	NM_013417	IARS	isoleucine--tRNA ligase, cytoplasmic	0.00377023	2.27405	down	chr9	-	94972624	95055972
ENST00000421509	RP11-281A20.2	2.81013e-05	2.6269	up	GENCODE	523	chr9	+	120545725	120630349	upstream	NM_138554	TLR4	toll-like receptor 4 isoform A precursor	8.19817e-06	2.58307	up	chr9	+	120466452	120479769
ENST00000422178	AC016745.3	6.13286e-05	3.3635	up	GENCODE	508	chr2	+	114182071	114182901	downstream	NM_025181	SLC35F5	solute carrier family 35 member F5	1.56352e-05	2.37902	down	chr2	-	114471932	114514400
ENST00000422178	AC016745.3	6.13286e-05	3.3635	up	GENCODE	508	chr2	+	114182071	114182901	upstream	ENST00000361779	IL1RN	interleukin 1 receptor antagonist [Source:HGNC Symbol;Acc:6000]	0.000283813	6.06284	up	chr2	+	113875469	113891593
ENST00000422178	AC016745.3	6.13286e-05	3.3635	up	GENCODE	508	chr2	+	114182071	114182901	upstream	NM_000577	IL1RN	interleukin-1 receptor antagonist protein isoform 3	0.0149562	2.24508	up	chr2	+	113875469	113891593
ENST00000422178	AC016745.3	6.13286e-05	3.3635	up	GENCODE	508	chr2	+	114182071	114182901	upstream	NM_173841	IL1RN	interleukin-1 receptor antagonist protein isoform 2	0.0308154	2.35604	up	chr2	+	113875469	113891593
ENST00000423274	BRWD1-AS1	0.00684429	3.25371	up	GENCODE	691	chr21	+	40687632	40695144	downstream	ENST00000380671	LCA5L	Leber congenital amaurosis 5-like [Source:HGNC Symbol;Acc:1255]	0.026849	4.54951	up	chr21	-	40777769	40816128
ENST00000423628	ERRFI1-IT1	0.000142609	6.20748	down	GENCODE	410	chr1	-	8066073	8066784	downstream	ENST00000054666	VAMP3	vesicle-associated membrane protein 3 (cellubrevin) [Source:HGNC Symbol;Acc:12644]	0.0149084	2.14162	down	chr1	+	7831328	7841492
ENST00000423628	ERRFI1-IT1	0.000142609	6.20748	down	GENCODE	410	chr1	-	8066073	8066784	upstream	NM_018948	ERRFI1	ERBB receptor feedback inhibitor 1	4.2e-12	13.1885	down	chr1	-	8071778	8086393
ENST00000423719	LINC00484	4.38279e-07	4.26404	down	GENCODE	2745	chr9	+	93922050	93927858	downstream	NM_005384	NFIL3	nuclear factor interleukin-3-regulated protein	0.00183589	2.07282	up	chr9	-	94171326	94186144
ENST00000424955	RP11-347K2.1	0.000304606	6.7378	down	GENCODE	418	chr1	+	103817768	103828355	upstream	ENST00000353414	COL11A1	collagen, type XI, alpha 1 [Source:HGNC Symbol;Acc:2186]	0.0128962	5.13914	down	chr1	-	103342022	103574052
ENST00000424955	RP11-347K2.1	0.000304606	6.7378	down	GENCODE	418	chr1	+	103817768	103828355	upstream	NM_001854	COL11A1	collagen alpha-1(XI) chain isoform A preproprotein	0.0120897	4.37245	down	chr1	-	103342022	103574052
ENST00000424955	RP11-347K2.1	0.000304606	6.7378	down	GENCODE	418	chr1	+	103817768	103828355	upstream	NM_080630	COL11A1	collagen alpha-1(XI) chain isoform C preproprotein	0.00641945	4.58772	down	chr1	-	103342022	103574052
ENST00000425587	RP11-561O23.8	0.00983487	2.3091	up	GENCODE	340	chr9	+	70843566	70844228	downstream	ENST00000396396	PGM5	phosphoglucomutase 5 [Source:HGNC Symbol;Acc:8908]	0.00394738	2.45028	down	chr9	+	70971814	71145977
ENST00000425666	RP11-389K14.3	0.00301207	7.23279	down	GENCODE	1013	chr9	-	93063183	93195771	upstream	NM_017594	DIRAS2	GTP-binding protein Di-Ras2	0.00136433	2.3733	down	chr9	-	93372113	93405108
ENST00000425900	RP4-764O22.1	0.000843871	2.74837	down	GENCODE	381	chr20	+	7050260	7127303	upstream	NM_001200	BMP2	bone morphogenetic protein 2 preproprotein	0.000483612	4.53206	down	chr20	+	6748744	6760910
ENST00000426204	RP11-202G18.1	0.0114437	3.16362	up	GENCODE	744	chr9	-	113901525	114047116	upstream	NM_001007169	ZNF483	zinc finger protein 483 isoform b	7.97487e-05	2.79279	down	chr9	+	114287446	114340124
ENST00000426204	RP11-202G18.1	0.0114437	3.16362	up	GENCODE	744	chr9	-	113901525	114047116	upstream	NM_133464	ZNF483	zinc finger protein 483 isoform a	4.8381e-09	2.60459	down	chr9	+	114287446	114306712
ENST00000426811	RP11-482E14.2	0.00044696	2.71305	down	GENCODE	430	chr10	-	3574285	3579223	upstream	NM_001300	KLF6	Krueppel-like factor 6 isoform A	2.27874e-08	2.06378	down	chr10	-	3818187	3827473
ENST00000427901	RP11-63P12.7	3.553e-10	9.87601	down	GENCODE	361	chr9	+	74872251	74872699	downstream	NM_001102420	ZFAND5	AN1-type zinc finger protein 5	5.53414e-06	2.71755	down	chr9	-	74966340	74980163
ENST00000427901	RP11-63P12.7	3.553e-10	9.87601	down	GENCODE	361	chr9	+	74872251	74872699	upstream	NM_004293	GDA	guanine deaminase isoform b	2.45e-10	24.7645	down	chr9	+	74764266	74867140
ENST00000427974	RP1-56L9.7	0.0172924	2.0244	up	GENCODE	741	chr6	-	160060338	160061133	upstream	NM_000636	SOD2	superoxide dismutase [Mn], mitochondrial isoform A precursor	0.0199326	2.4117	up	chr6	-	160102754	160114353
ENST00000428643	HMGA1P4	0.00073175	2.47491	up	GENCODE	334	chr9	-	131425412	131425857	downstream	NM_001003722	GLE1	nucleoporin GLE1 isoform 1	5.49051e-05	2.08544	up	chr9	+	131266970	131304580
ENST00000428643	HMGA1P4	0.00073175	2.47491	up	GENCODE	334	chr9	-	131425412	131425857	downstream	NM_001130438	SPTAN1	spectrin alpha chain, brain isoform 1	0.00336688	2.76702	down	chr9	+	131314836	131395944
ENST00000428643	HMGA1P4	0.00073175	2.47491	up	GENCODE	334	chr9	-	131425412	131425857	downstream	NM_003127	SPTAN1	spectrin alpha chain, brain isoform 2	0.00071037	2.12873	down	chr9	+	131314836	131395944
ENST00000428643	HMGA1P4	0.00073175	2.47491	up	GENCODE	334	chr9	-	131425412	131425857	downstream	NM_016174	CERCAM	glycosyltransferase 25 family member 3 precursor	0.00187001	2.81378	down	chr9	+	131182758	131199630
ENST00000428643	HMGA1P4	0.00073175	2.47491	up	GENCODE	334	chr9	-	131425412	131425857	upstream	ENST00000421063	PHYHD1	phytanoyl-CoA dioxygenase domain containing 1 [Source:HGNC Symbol;Acc:23396]	0.0124366	2.15501	down	chr9	+	131684561	131704320
ENST00000428643	HMGA1P4	0.00073175	2.47491	up	GENCODE	334	chr9	-	131425412	131425857	upstream	NM_003011	SET	protein SET isoform 2	0.00177124	2.33356	down	chr9	+	131451508	131458675
ENST00000428643	HMGA1P4	0.00073175	2.47491	up	GENCODE	334	chr9	-	131425412	131425857	upstream	NM_032799	ZDHHC12	probable palmitoyltransferase ZDHHC12	0.047744	2.77355	down	chr9	-	131483148	131486408
ENST00000429044	RP11-555F9.2	6.1909e-05	2.63379	up	GENCODE	291	chr9	-	93323310	93344976	upstream	NM_017594	DIRAS2	GTP-binding protein Di-Ras2	0.00136433	2.3733	down	chr9	-	93372113	93405108
ENST00000429932	LL0XNC01-237H1.2	0.00335867	2.1051	down	GENCODE	439	chrX	+	102152508	102160619	downstream	NM_018476	BEX1	protein BEX1	0.0300168	2.23821	down	chrX	-	102317580	102319168
ENST00000429932	LL0XNC01-237H1.2	0.00335867	2.1051	down	GENCODE	439	chrX	+	102152508	102160619	upstream	NM_001099411	GPRASP1	G-protein coupled receptor-associated sorting protein 1	0.00362557	2.15679	down	chrX	+	101906293	101914010
ENST00000429932	LL0XNC01-237H1.2	0.00335867	2.1051	down	GENCODE	439	chrX	+	102152508	102160619	upstream	NM_001184874	GPRASP2	G-protein coupled receptor-associated sorting protein 2	5.45102e-05	2.86977	down	chrX	+	101967103	101972661
ENST00000429932	LL0XNC01-237H1.2	0.00335867	2.1051	down	GENCODE	439	chrX	+	102152508	102160619	upstream	NM_030639	BHLHB9	protein BHLHb9	0.000267877	2.19686	down	chrX	+	101975641	102007369
ENST00000429980	RP11-143M1.2	5.2685e-09	2.70019	down	GENCODE	394	chr9	+	72700	88826	downstream	NM_001193536	DOCK8	dedicator of cytokinesis protein 8 isoform 3	8.26866e-06	2.71475	up	chr9	+	273047	465259
ENST00000430562	CD99P1	2.92396e-05	4.2998	down	GENCODE	984	chrX	+	2527434	2556370	downstream	NM_001079855	GYG2	glycogenin-2 isoform a	8.07009e-07	2.93449	down	chrX	+	2746862	2800861
ENST00000430562	CD99P1	2.92396e-05	4.2998	down	GENCODE	984	chrX	+	2527434	2556370	downstream	NM_001141919	XG	glycoprotein Xg isoform 2 precursor	5.29803e-05	2.72516	up	chrX	+	2670092	2734541
ENST00000430562	CD99P1	2.92396e-05	4.2998	down	GENCODE	984	chrX	+	2527434	2556370	downstream	NM_001184703	GYG2	glycogenin-2 isoform d	3.06896e-05	2.44651	down	chrX	+	2746862	2800861
ENST00000430562	CD99P1	2.92396e-05	4.2998	down	GENCODE	984	chrX	+	2527434	2556370	downstream	NM_002414	CD99	CD99 antigen isoform a precursor	0.00194195	3.07114	down	chrX	+	2609227	2659350
ENST00000430562	CD99P1	2.92396e-05	4.2998	down	GENCODE	984	chrX	+	2527434	2556370	downstream	NM_003918	GYG2	glycogenin-2 isoform b	1.09066e-05	2.74474	down	chrX	+	2746862	2800861
ENST00000430945	LINC00475	0.000213963	4.79545	down	GENCODE	476	chr9	+	94907222	94910588	downstream	NM_005014	OMD	osteomodulin precursor	8.6172e-09	3.79222	down	chr9	-	95176526	95186836
ENST00000430945	LINC00475	0.000213963	4.79545	down	GENCODE	476	chr9	+	94907222	94910588	downstream	NM_013417	IARS	isoleucine--tRNA ligase, cytoplasmic	0.00377023	2.27405	down	chr9	-	94972624	95055972
ENST00000431401	RP1-290I10.5	0.00772479	2.66345	down	GENCODE	256	chr6	-	10474732	10478735	downstream	NM_001042425	TFAP2A	transcription factor AP-2-alpha isoform c	0.0283023	2.04962	down	chr6	-	10396915	10419797
ENST00000431401	RP1-290I10.5	0.00772479	2.66345	down	GENCODE	256	chr6	-	10474732	10478735	upstream	NM_145649	GCNT2	N-acetyllactosaminide beta-1,6-N-acetylglucosaminyl-transferase isoform A	0.00321468	3.57928	up	chr6	+	10521567	10629601
ENST00000431557	AC012074.2	0.015916	2.14373	down	GENCODE	419	chr2	-	25592041	25598714	upstream	NM_033148	DTNB	dystrobrevin beta isoform 3	0.00077826	2.62685	up	chr2	-	25600111	25896516
ENST00000431557	AC012074.2	0.015916	2.14373	down	GENCODE	419	chr2	-	25592041	25598714	upstream	NM_183361	DTNB	dystrobrevin beta isoform 5	0.0264913	2.21901	down	chr2	-	25600111	25896516
ENST00000431582	CD99P1	8.33979e-06	6.86857	down	GENCODE	602	chrX	+	2527388	2534212	downstream	NM_001079855	GYG2	glycogenin-2 isoform a	8.07009e-07	2.93449	down	chrX	+	2746862	2800861
ENST00000431582	CD99P1	8.33979e-06	6.86857	down	GENCODE	602	chrX	+	2527388	2534212	downstream	NM_001141919	XG	glycoprotein Xg isoform 2 precursor	5.29803e-05	2.72516	up	chrX	+	2670092	2734541
ENST00000431582	CD99P1	8.33979e-06	6.86857	down	GENCODE	602	chrX	+	2527388	2534212	downstream	NM_001184703	GYG2	glycogenin-2 isoform d	3.06896e-05	2.44651	down	chrX	+	2746862	2800861
ENST00000431582	CD99P1	8.33979e-06	6.86857	down	GENCODE	602	chrX	+	2527388	2534212	downstream	NM_002414	CD99	CD99 antigen isoform a precursor	0.00194195	3.07114	down	chrX	+	2609227	2659350
ENST00000431582	CD99P1	8.33979e-06	6.86857	down	GENCODE	602	chrX	+	2527388	2534212	downstream	NM_003918	GYG2	glycogenin-2 isoform b	1.09066e-05	2.74474	down	chrX	+	2746862	2800861
ENST00000431650	AC012457.2	0.0196722	2.33878	up	GENCODE	466	chr2	+	25427181	25432071	downstream	NM_033148	DTNB	dystrobrevin beta isoform 3	0.00077826	2.62685	up	chr2	-	25600111	25896516
ENST00000431650	AC012457.2	0.0196722	2.33878	up	GENCODE	466	chr2	+	25427181	25432071	downstream	NM_183361	DTNB	dystrobrevin beta isoform 5	0.0264913	2.21901	down	chr2	-	25600111	25896516
ENST00000432148	RP11-274B18.2	1.24576e-05	3.08208	up	GENCODE	495	chr9	-	71158456	71161032	downstream	ENST00000396396	PGM5	phosphoglucomutase 5 [Source:HGNC Symbol;Acc:8908]	0.00394738	2.45028	down	chr9	+	70971814	71145977
ENST00000432473	Z83851.1	1.92414e-06	5.17341	up	GENCODE	780	chr22	-	42760405	42765174	upstream	ENST00000327678	SERHL2	serine hydrolase-like 2 [Source:HGNC Symbol;Acc:29446]	0.00276289	2.23662	down	chr22	+	42949924	42970388
ENST00000432473	Z83851.1	1.92414e-06	5.17341	up	GENCODE	780	chr22	-	42760405	42765174	upstream	NM_001171660	CYB5R3	NADH-cytochrome b5 reductase 3 isoform 3	1.998e-09	2.1602	down	chr22	-	43013845	43040640
ENST00000432473	Z83851.1	1.92414e-06	5.17341	up	GENCODE	780	chr22	-	42760405	42765174	upstream	NM_145912	NFAM1	NFAT activation molecule 1 precursor	0.000874722	2.53433	up	chr22	-	42776413	42828401
ENST00000433121	RP5-908M14.5	0.00136107	2.12989	down	GENCODE	477	chr20	+	61004603	61006568	downstream	ENST00000217159	SLCO4A1	solute carrier organic anion transporter family, member 4A1 [Source:HGNC Symbol;Acc:10953]	0.00694644	4.08736	down	chr20	+	61273796	61303647
ENST00000433121	RP5-908M14.5	0.00136107	2.12989	down	GENCODE	477	chr20	+	61004603	61006568	upstream	NM_007232	HRH3	histamine H3 receptor	0.0308435	2.02939	down	chr20	-	60790016	60795323
ENST00000433121	RP5-908M14.5	0.00136107	2.12989	down	GENCODE	477	chr20	+	61004603	61006568	upstream	NM_031215	CABLES2	CDK5 and ABL1 enzyme substrate 2	0.00310693	2.2516	down	chr20	-	60963685	60982339
ENST00000433644	RP11-435O5.2	0.000583259	2.85007	down	GENCODE	739	chr9	-	98177780	98189078	downstream	NM_000136	FANCC	Fanconi anemia group C protein isoform a	1.10386e-06	2.83108	down	chr9	-	97861335	98079991
ENST00000433644	RP11-435O5.2	0.000583259	2.85007	down	GENCODE	739	chr9	-	98177780	98189078	upstream	NM_000264	PTCH1	protein patched homolog 1 isoform L	1.77901e-05	5.79927	down	chr9	-	98205263	98270831
ENST00000433644	RP11-435O5.2	0.000583259	2.85007	down	GENCODE	739	chr9	-	98177780	98189078	upstream	NM_001083602	PTCH1	protein patched homolog 1 isoform M	0.000722871	6.11793	down	chr9	-	98205263	98279247
ENST00000433644	RP11-435O5.2	0.000583259	2.85007	down	GENCODE	739	chr9	-	98177780	98189078	upstream	NM_001083603	PTCH1	protein patched homolog 1 isoform L'	2.68617e-06	4.66844	down	chr9	-	98205263	98279247
ENST00000433644	RP11-435O5.2	0.000583259	2.85007	down	GENCODE	739	chr9	-	98177780	98189078	upstream	NM_001083607	PTCH1	protein patched homolog 1 isoform S	1.71563e-05	3.15252	down	chr9	-	98205263	98269481
ENST00000434081	LINC00163	4.11466e-06	12.3543	up	GENCODE	2155	chr21	-	46409778	46414001	upstream	ENST00000539173	ADARB1	adenosine deaminase, RNA-specific, B1 [Source:HGNC Symbol;Acc:226]	0.00134241	2.79777	down	chr21	+	46494492	46646478
ENST00000434081	LINC00163	4.11466e-06	12.3543	up	GENCODE	2155	chr21	-	46409778	46414001	upstream	NM_001112	ADARB1	double-stranded RNA-specific editase 1 isoform 1	0.00639438	2.87267	down	chr21	+	46494492	46646478
ENST00000434081	LINC00163	4.11466e-06	12.3543	up	GENCODE	2155	chr21	-	46409778	46414001	upstream	NM_015227	POFUT2	GDP-fucose protein O-fucosyltransferase 2 isoform A precursor	0.00168288	2.04724	down	chr21	-	46683842	46707811
ENST00000434081	LINC00163	4.11466e-06	12.3543	up	GENCODE	2155	chr21	-	46409778	46414001	upstream	NM_015834	ADARB1	double-stranded RNA-specific editase 1 isoform 3	0.0023455	2.98326	down	chr21	+	46494492	46646478
ENST00000434081	LINC00163	4.11466e-06	12.3543	up	GENCODE	2155	chr21	-	46409778	46414001	upstream	NM_133635	POFUT2	GDP-fucose protein O-fucosyltransferase 2 isoform C precursor	6.46958e-07	3.07694	down	chr21	-	46683842	46707811
ENST00000434098	RP11-85G21.2	0.0284892	2.37151	up	GENCODE	156	chr1	-	157257492	157257843	downstream	NM_005240	ETV3	ETS translocation variant 3 isoform 2	0.00231048	2.65172	up	chr1	-	157102975	157108177
ENST00000434255	RP1-32B1.4	0.000105526	5.18639	up	GENCODE	216	chr6	+	135581133	135582071	upstream	NM_001130172	MYB	transcriptional activator Myb isoform 3	0.00191548	6.92548	up	chr6	+	135502452	135540311
ENST00000434255	RP1-32B1.4	0.000105526	5.18639	up	GENCODE	216	chr6	+	135581133	135582071	upstream	NM_001161656	MYB	transcriptional activator Myb isoform 4	0.000631159	10.3332	up	chr6	+	135502452	135540311
ENST00000434255	RP1-32B1.4	0.000105526	5.18639	up	GENCODE	216	chr6	+	135581133	135582071	upstream	NM_001161659	MYB	transcriptional activator Myb isoform 7	0.0034798	6.84006	up	chr6	+	135502452	135540311
ENST00000434255	RP1-32B1.4	0.000105526	5.18639	up	GENCODE	216	chr6	+	135581133	135582071	upstream	NM_005375	MYB	transcriptional activator Myb isoform 2	0.00333895	7.91375	up	chr6	+	135502452	135540310
ENST00000434944	LINC00475	0.0260855	3.25286	down	GENCODE	796	chr9	+	94914875	94920770	downstream	NM_005014	OMD	osteomodulin precursor	8.6172e-09	3.79222	down	chr9	-	95176526	95186836
ENST00000434944	LINC00475	0.0260855	3.25286	down	GENCODE	796	chr9	+	94914875	94920770	downstream	NM_013417	IARS	isoleucine--tRNA ligase, cytoplasmic	0.00377023	2.27405	down	chr9	-	94972624	95055972
ENST00000435581	CD99P1	1.88848e-06	5.6733	down	GENCODE	2788	chrX	+	2527432	2575270	downstream	NM_001079855	GYG2	glycogenin-2 isoform a	8.07009e-07	2.93449	down	chrX	+	2746862	2800861
ENST00000435581	CD99P1	1.88848e-06	5.6733	down	GENCODE	2788	chrX	+	2527432	2575270	downstream	NM_001141919	XG	glycoprotein Xg isoform 2 precursor	5.29803e-05	2.72516	up	chrX	+	2670092	2734541
ENST00000435581	CD99P1	1.88848e-06	5.6733	down	GENCODE	2788	chrX	+	2527432	2575270	downstream	NM_001184703	GYG2	glycogenin-2 isoform d	3.06896e-05	2.44651	down	chrX	+	2746862	2800861
ENST00000435581	CD99P1	1.88848e-06	5.6733	down	GENCODE	2788	chrX	+	2527432	2575270	downstream	NM_002414	CD99	CD99 antigen isoform a precursor	0.00194195	3.07114	down	chrX	+	2609227	2659350
ENST00000435581	CD99P1	1.88848e-06	5.6733	down	GENCODE	2788	chrX	+	2527432	2575270	downstream	NM_003918	GYG2	glycogenin-2 isoform b	1.09066e-05	2.74474	down	chrX	+	2746862	2800861
ENST00000435885	RP11-214F16.3	0.000489563	8.01616	down	GENCODE	335	chr13	-	100143536	100144751	downstream	NM_004951	GPR183	G-protein coupled receptor 183	5.03659e-08	3.15537	up	chr13	-	99946788	99959749
ENST00000435984	AC104135.3	7.073e-10	10.0369	down	GENCODE	565	chr2	+	75145274	75159921	downstream	NM_001058	TACR1	substance-P receptor isoform long	0.0345114	2.66558	down	chr2	-	75273589	75426645
ENST00000436054	RP11-63P12.6	0.0138401	3.99364	up	GENCODE	2078	chr9	+	74920351	74958126	downstream	NM_001102420	ZFAND5	AN1-type zinc finger protein 5	5.53414e-06	2.71755	down	chr9	-	74966340	74980163
ENST00000436054	RP11-63P12.6	0.0138401	3.99364	up	GENCODE	2078	chr9	+	74920351	74958126	upstream	NM_004293	GDA	guanine deaminase isoform b	2.45e-10	24.7645	down	chr9	+	74764266	74867140
ENST00000436112	RP3-523C21.1	0.0415145	2.04561	down	GENCODE	512	chr6	+	132481903	132490501	upstream	ENST00000360971	ENPP1	ectonucleotide pyrophosphatase/phosphodiesterase 1 [Source:HGNC Symbol;Acc:3356]	0.000278415	13.717	down	chr6	+	132129155	132216295
ENST00000436112	RP3-523C21.1	0.0415145	2.04561	down	GENCODE	512	chr6	+	132481903	132490501	upstream	NM_001901	CTGF	connective tissue growth factor precursor	5.57834e-06	5.07435	down	chr6	-	132269316	132272518
ENST00000436492	RP1-125N5.2	1.24432e-08	6.93648	up	GENCODE	557	chr6	+	169116744	169123604	upstream	ENST00000354536	SMOC2	SPARC related modular calcium binding 2 [Source:HGNC Symbol;Acc:20323]	3.4689e-09	11.6177	down	chr6	+	168841830	169068674
ENST00000436492	RP1-125N5.2	1.24432e-08	6.93648	up	GENCODE	557	chr6	+	169116744	169123604	upstream	ENST00000356284	SMOC2	SPARC related modular calcium binding 2 [Source:HGNC Symbol;Acc:20323]	9.88483e-06	9.91622	down	chr6	+	168841830	169068674
ENST00000436804	XXbac-BPG13B8.10	0.00124895	2.6384	up	GENCODE	877	chr6	+	29465285	29478333	downstream	NM_006398	UBD	ubiquitin D	6.3704e-09	5.15669	up	chr6	-	29523388	29527702
ENST00000438790	RP1-65J11.1	0.00308692	2.27568	down	GENCODE	446	chr1	+	31297521	31306580	upstream	NM_006762	LAPTM5	lysosomal-associated transmembrane protein 5	0.00616588	2.73348	up	chr1	-	31205314	31230683
ENST00000439046	AC019117.2	0.0424999	2.08152	up	GENCODE	589	chr7	-	17474100	17500296	downstream	NM_001621	AHR	aryl hydrocarbon receptor precursor	0.000509245	2.40052	up	chr7	+	17338275	17385775
ENST00000439341	RP5-858B6.3	5.05424e-05	2.78728	down	GENCODE	794	chr1	+	231010591	231014761	upstream	NM_000029	AGT	angiotensinogen preproprotein	0.00209578	2.94789	down	chr1	-	230838271	230850336
ENST00000440735	RP11-365P13.3	0.0472196	3.83692	up	GENCODE	684	chr13	+	111635653	111642911	upstream	NM_198218	ING1	inhibitor of growth protein 1 isoform B	0.0103688	2.01555	up	chr13	+	111365609	111373421
ENST00000440790	ZNF192P1	0.00217335	2.07026	down	GENCODE	1628	chr6	+	28129558	28137372	downstream	NM_001012455	ZSCAN23	zinc finger and SCAN domain-containing protein 23	4.49927e-06	2.129	down	chr6	-	28400431	28411279
ENST00000440790	ZNF192P1	0.00217335	2.07026	down	GENCODE	1628	chr6	+	28129558	28137372	downstream	NM_001163391	ZSCAN12	zinc finger and SCAN domain-containing protein 12	0.000445812	2.31421	down	chr6	-	28356726	28367544
ENST00000440790	ZNF192P1	0.00217335	2.07026	down	GENCODE	1628	chr6	+	28129558	28137372	upstream	ENST00000244623	OR2B6	olfactory receptor, family 2, subfamily B, member 6 [Source:HGNC Symbol;Acc:8241]	1.25768e-05	2.77659	up	chr6	+	27925018	27925960
ENST00000440790	ZNF192P1	0.00217335	2.07026	down	GENCODE	1628	chr6	+	28129558	28137372	upstream	ENST00000328488	HIST1H3I	histone cluster 1, H3i [Source:HGNC Symbol;Acc:4771]	0.0043588	2.06065	up	chr6	-	27839622	27840099
ENST00000440790	ZNF192P1	0.00217335	2.07026	down	GENCODE	1628	chr6	+	28129558	28137372	upstream	ENST00000355981	HIST1H4L	histone cluster 1, H4l [Source:HGNC Symbol;Acc:4791]	0.0103029	3.20876	up	chr6	-	27840925	27841289
ENST00000442069	RP11-143M1.2	6.35378e-06	3.15352	down	GENCODE	575	chr9	+	72715	75298	downstream	NM_001193536	DOCK8	dedicator of cytokinesis protein 8 isoform 3	8.26866e-06	2.71475	up	chr9	+	273047	465259
ENST00000443633	RP13-137A17.4	0.0291047	4.26755	down	GENCODE	2619	chr10	-	134757470	134778793	downstream	NM_005539	INPP5A	type I inositol 1,4,5-trisphosphate 5-phosphatase	0.000265338	2.87462	down	chr10	+	134351352	134596984
ENST00000443988	AC018730.1	0.00196186	2.09838	up	GENCODE	675	chr2	-	105424030	105467911	upstream	NM_006236	POU3F3	POU domain, class 3, transcription factor 3	0.00281123	3.57171	down	chr2	+	105471968	105473471
ENST00000444476	LINC00475	1.28204e-07	2.48463	down	GENCODE	456	chr9	+	94909993	94910588	downstream	NM_005014	OMD	osteomodulin precursor	8.6172e-09	3.79222	down	chr9	-	95176526	95186836
ENST00000444476	LINC00475	1.28204e-07	2.48463	down	GENCODE	456	chr9	+	94909993	94910588	downstream	NM_013417	IARS	isoleucine--tRNA ligase, cytoplasmic	0.00377023	2.27405	down	chr9	-	94972624	95055972
ENST00000445339	RP11-552D4.1	0.00936811	2.1611	up	GENCODE	654	chr1	+	230138476	230142909	downstream	NM_004481	GALNT2	polypeptide N-acetylgalactosaminyltransferase 2 precursor	0.010003	2.01297	down	chr1	+	230202955	230417875
ENST00000446290	RP11-274B18.2	3.99443e-08	3.33642	up	GENCODE	338	chr9	-	71158456	71161505	downstream	ENST00000396396	PGM5	phosphoglucomutase 5 [Source:HGNC Symbol;Acc:8908]	0.00394738	2.45028	down	chr9	+	70971814	71145977
ENST00000446887	RP1-111C20.3	1.18311e-05	3.62544	up	GENCODE	331	chr6	-	159485759	159486305	downstream	NM_138810	TAGAP	T-cell activation Rho GTPase-activating protein isoform c	0.000575852	2.76804	up	chr6	-	159459943	159466184
ENST00000446887	RP1-111C20.3	1.18311e-05	3.62544	up	GENCODE	331	chr6	-	159485759	159486305	downstream	NM_152133	TAGAP	T-cell activation Rho GTPase-activating protein isoform a	2.22634e-08	2.77401	up	chr6	-	159456026	159466184
ENST00000447250	RP4-625H18.2	0.00138114	2.41526	down	GENCODE	1016	chr6	-	19803601	19804877	upstream	NM_001546	ID4	DNA-binding protein inhibitor ID-4	7.14716e-08	5.36505	down	chr6	+	19837600	19842431
ENST00000447864	AP002856.6	6.66972e-06	3.01942	up	GENCODE	562	chr11	+	131074893	131085058	downstream	NM_001048209	NTM	neurotrimin isoform 2 precursor	2.42116e-05	5.76301	down	chr11	+	131240370	132206716
ENST00000448204	AC114752.1	0.049248	2.10263	up	GENCODE	289	chr2	-	64557619	64559265	upstream	NM_014181	LGALSL	galectin-related protein	0.000110189	3.36027	down	chr2	+	64681326	64688517
ENST00000448327	RP11-345L23.1	0.00374189	11.0626	up	GENCODE	566	chr6	+	53493177	53496192	upstream	NM_001498	GCLC	glutamate--cysteine ligase catalytic subunit isoform a	0.000163362	4.00417	up	chr6	-	53362139	53409927
ENST00000448327	RP11-345L23.1	0.00374189	11.0626	up	GENCODE	566	chr6	+	53493177	53496192	upstream	NM_021814	ELOVL5	elongation of very long chain fatty acids protein 5 isoform 1	0.000135872	2.19227	up	chr6	-	53132195	53213977
ENST00000448595	AC109826.2	0.00026777	3.45385	up	GENCODE	548	chr2	-	99385423	99388543	downstream	ENST00000393487	MGAT4A	mannosyl (alpha-1,3-)-glycoprotein beta-1,4-N-acetylglucosaminyltransferase, isozyme A [Source:HGNC Symbol;Acc:7047]	3.46544e-06	2.5607	up	chr2	-	99235568	99347589
ENST00000448595	AC109826.2	0.00026777	3.45385	up	GENCODE	548	chr2	-	99385423	99388543	upstream	NM_025244	TSGA10	testis-specific gene 10 protein	0.000306343	13.1993	up	chr2	-	99613723	99771187
ENST00000448595	AC109826.2	0.00026777	3.45385	up	GENCODE	548	chr2	-	99385423	99388543	upstream	NM_207362	KIAA1211L	uncharacterized protein C2orf55	0.000409188	6.5769	up	chr2	-	99410308	99552684
ENST00000448672	AC068492.1	1.28346e-05	6.97886	down	GENCODE	469	chr2	+	136835461	136836083	downstream	NM_003467	CXCR4	C-X-C chemokine receptor type 4 isoform b	0.00419515	2.19958	up	chr2	-	136871918	136875725
ENST00000448909	RP11-307P5.2	3.354e-10	4.90661	down	GENCODE	603	chr6	-	148062569	148064460	downstream	NM_001030060	SAMD5	sterile alpha motif domain-containing protein 5	7.66411e-05	6.81474	down	chr6	+	147829827	147891157
ENST00000449144	RP11-384P7.5	0.0049221	2.63704	up	GENCODE	1144	chr9	+	33719687	33722553	upstream	NM_001244752	ANKRD18B	ankyrin repeat domain-containing protein 18B	0.0326791	2.28104	up	chr9	+	33524410	33573001
ENST00000449453	RP11-199F6.4	6.91814e-07	5.47429	down	GENCODE	344	chr13	+	114580580	114582349	upstream	NM_000820	GAS6	growth arrest-specific protein 6 isoform 1 precursor	0.00311631	2.05995	down	chr13	-	114523521	114567046
ENST00000449453	RP11-199F6.4	6.91814e-07	5.47429	down	GENCODE	344	chr13	+	114580580	114582349	upstream	NM_001143945	GAS6	growth arrest-specific protein 6 isoform 2	0.000745543	2.34596	down	chr13	-	114523521	114539017
ENST00000449453	RP11-199F6.4	6.91814e-07	5.47429	down	GENCODE	344	chr13	+	114580580	114582349	upstream	NM_001143946	GAS6	growth arrest-specific protein 6 isoform 3	0.000587824	2.51631	down	chr13	-	114523521	114536714
ENST00000449954	AL078621.3	1.58747e-05	18.8166	up	GENCODE	745	chr2	+	114270039	114273062	downstream	NM_025181	SLC35F5	solute carrier family 35 member F5	1.56352e-05	2.37902	down	chr2	-	114471932	114514400
ENST00000451152	RP11-63P12.6	0.000106505	5.35512	up	GENCODE	588	chr9	+	74920432	74930380	downstream	NM_001102420	ZFAND5	AN1-type zinc finger protein 5	5.53414e-06	2.71755	down	chr9	-	74966340	74980163
ENST00000451152	RP11-63P12.6	0.000106505	5.35512	up	GENCODE	588	chr9	+	74920432	74930380	upstream	NM_004293	GDA	guanine deaminase isoform b	2.45e-10	24.7645	down	chr9	+	74764266	74867140
ENST00000451910	RP11-344J7.2	0.00249103	3.04295	up	GENCODE	394	chr6	-	43819493	43820070	downstream	NM_001025367	VEGFA	vascular endothelial growth factor A isoform c	3.84919e-06	3.74729	down	chr6	+	43737945	43754223
ENST00000451910	RP11-344J7.2	0.00249103	3.04295	up	GENCODE	394	chr6	-	43819493	43820070	downstream	NM_001025368	VEGFA	vascular endothelial growth factor A isoform d	1.00695e-05	6.42974	down	chr6	+	43737945	43754223
ENST00000451910	RP11-344J7.2	0.00249103	3.04295	up	GENCODE	394	chr6	-	43819493	43820070	downstream	NM_001025369	VEGFA	vascular endothelial growth factor A isoform e	1.4483e-06	5.44439	down	chr6	+	43737945	43754223
ENST00000451910	RP11-344J7.2	0.00249103	3.04295	up	GENCODE	394	chr6	-	43819493	43820070	downstream	NM_001025370	VEGFA	vascular endothelial growth factor A isoform f	3.83419e-05	4.4615	down	chr6	+	43737945	43754223
ENST00000451910	RP11-344J7.2	0.00249103	3.04295	up	GENCODE	394	chr6	-	43819493	43820070	downstream	NM_001033756	VEGFA	vascular endothelial growth factor A isoform g	6.72364e-05	7.08174	down	chr6	+	43737945	43754223
ENST00000451910	RP11-344J7.2	0.00249103	3.04295	up	GENCODE	394	chr6	-	43819493	43820070	downstream	NM_001171622	VEGFA	vascular endothelial growth factor A isoform h	2.36279e-05	2.74409	down	chr6	+	43737945	43754223
ENST00000451910	RP11-344J7.2	0.00249103	3.04295	up	GENCODE	394	chr6	-	43819493	43820070	downstream	NM_001171624	VEGFA	vascular endothelial growth factor A isoform j precursor	9.22087e-07	4.44058	down	chr6	+	43737945	43754223
ENST00000451910	RP11-344J7.2	0.00249103	3.04295	up	GENCODE	394	chr6	-	43819493	43820070	downstream	NM_001193341	RSPH9	radial spoke head protein 9 homolog isoform 2	0.0131472	5.42277	up	chr6	+	43612766	43638748
ENST00000451910	RP11-344J7.2	0.00249103	3.04295	up	GENCODE	394	chr6	-	43819493	43820070	downstream	NM_152732	RSPH9	radial spoke head protein 9 homolog isoform 1	0.00704545	9.99715	up	chr6	+	43612766	43638748
ENST00000452366	RP3-471M13.2	1.07399e-07	5.16471	down	GENCODE	658	chr1	+	172876039	172876824	upstream	NM_014283	SUCO	protein osteopotentia homolog isoform 1 precursor	0.00177556	2.1364	down	chr1	+	172502259	172580973
ENST00000452377	RP11-399H11.3	0.000586673	2.54141	down	GENCODE	527	chr9	-	138096567	138129443	upstream	NM_001048265	C9orf116	UPF0691 protein C9orf116 isoform 1	0.00175243	5.88583	up	chr9	-	138387025	138391761
ENST00000452377	RP11-399H11.3	0.000586673	2.54141	down	GENCODE	527	chr9	-	138096567	138129443	upstream	NM_144654	C9orf116	UPF0691 protein C9orf116 isoform 2	0.00419228	5.41147	up	chr9	-	138387025	138391761
ENST00000453564	AC099342.1	4.15e-11	7.80818	down	GENCODE	376	chr7	+	20337916	20340248	downstream	NM_002214	ITGB8	integrin beta-8 precursor	1.2412e-09	5.76471	down	chr7	+	20370724	20455382
ENST00000453951	AC104135.4	3.32283e-07	11.6269	down	GENCODE	1266	chr2	+	75167384	75169797	downstream	NM_001058	TACR1	substance-P receptor isoform long	0.0345114	2.66558	down	chr2	-	75273589	75426645
ENST00000454305	RP4-706A16.2	2.86085e-07	7.24915	down	GENCODE	497	chr1	+	77533604	77544167	upstream	NM_030965	ST6GALNAC5	alpha-N-acetylgalactosaminide alpha-2,6-sialyltransferase 5	2.27795e-06	12.8303	down	chr1	+	77333185	77529737
ENST00000454625	GS1-421I3.2	1.46613e-06	7.42491	down	GENCODE	772	chrX	-	119144674	119149501	downstream	NM_001008534	AKAP14	A-kinase anchor protein 14 isoform b	0.000708046	49.8949	up	chrX	+	119029935	119054679
ENST00000454625	GS1-421I3.2	1.46613e-06	7.42491	down	GENCODE	772	chrX	-	119144674	119149501	downstream	NM_001105576	SOWAHD	ankyrin repeat domain-containing protein SOWAHD	9.45988e-05	3.02889	up	chrX	+	118892575	118894165
ENST00000455247	LINC00505	0.000273438	2.42984	down	GENCODE	354	chr1	+	46921494	46948147	upstream	NM_001441	FAAH	fatty-acid amide hydrolase 1	0.0465806	2.27199	down	chr1	+	46859938	46879520
ENST00000455247	LINC00505	0.000273438	2.42984	down	GENCODE	354	chr1	+	46921494	46948147	upstream	NM_005727	TSPAN1	tetraspanin-1	0.000338253	8.6398	up	chr1	+	46640748	46651634
ENST00000455699	RP11-80H5.7	0.0249667	2.21826	down	GENCODE	667	chr10	-	91454051	91457685	downstream	ENST00000341233	SLC16A12	solute carrier family 16, member 12 (monocarboxylic acid transporter 12) [Source:HGNC Symbol;Acc:23094]	7.12859e-05	5.50516	up	chr10	-	91190050	91295313
ENST00000455981	RP11-344B5.2	4.32471e-05	2.50268	up	GENCODE	583	chr9	+	132044736	132048007	upstream	NM_203434	IER5L	immediate early response gene 5-like protein	4.40991e-06	3.75447	down	chr9	-	131937830	131940540
ENST00000457457	AC016735.1	0.00111907	2.99103	down	GENCODE	237	chr2	-	43228494	43233200	downstream	NM_012205	HAAO	3-hydroxyanthranilate 3,4-dioxygenase	1.69914e-05	2.22411	down	chr2	-	42994228	43019751
ENST00000457602	AC097495.2	0.000624222	4.49948	up	GENCODE	574	chr2	+	69062135	69064856	upstream	NM_001166277	ARHGAP25	rho GTPase-activating protein 25 isoform d	0.0109583	2.60591	up	chr2	+	68961912	69053957
ENST00000457976	RP11-305L7.3	0.00529668	2.16176	up	GENCODE	506	chr9	-	93881419	93925369	upstream	NM_005384	NFIL3	nuclear factor interleukin-3-regulated protein	0.00183589	2.07282	up	chr9	-	94171326	94186144
ENST00000458253	AC018730.1	0.000108415	4.26818	up	GENCODE	747	chr2	-	105424034	105467916	upstream	NM_006236	POU3F3	POU domain, class 3, transcription factor 3	0.00281123	3.57171	down	chr2	+	105471968	105473471
ENST00000469418	AC093627.6	1.83621e-05	5.1005	up	GENCODE	888	chr7	-	20833	35479	upstream	NM_020223	FAM20C	extracellular serine/threonine protein kinase Fam20C precursor	0.00482762	2.76165	down	chr7	+	192968	300740
ENST00000480075	AC093627.6	0.0123626	4.1428	up	GENCODE	1005	chr7	-	19756	35457	upstream	NM_020223	FAM20C	extracellular serine/threonine protein kinase Fam20C precursor	0.00482762	2.76165	down	chr7	+	192968	300740
ENST00000521507	TPT1-AS1	0.0094725	10.9207	up	GENCODE	665	chr13	+	45918438	45953409	downstream	NM_001010875	SLC25A30	kidney mitochondrial carrier protein 1	0.00018733	2.10207	down	chr13	-	45967453	45992516
ENST00000522845	TPT1-AS1	0.0456989	8.31579	up	GENCODE	517	chr13	+	45940521	45952767	downstream	NM_001010875	SLC25A30	kidney mitochondrial carrier protein 1	0.00018733	2.10207	down	chr13	-	45967453	45992516
ENST00000545177	RP11-420G6.4	8.4605e-05	2.43449	up	GENCODE	1251	chr6	-	2854891	2876744	upstream	NM_001069	TUBB2A	tubulin beta-2A chain	1.69955e-06	3.63605	down	chr6	-	3153901	3157783
ENST00000545177	RP11-420G6.4	8.4605e-05	2.43449	up	GENCODE	1251	chr6	-	2854891	2876744	upstream	NM_004568	SERPINB6	serpin B6	8.4267e-09	2.34345	up	chr6	-	2948392	2972399
ENST00000562227	ZNF192P1	3.4409e-08	2.42025	down	GENCODE	1113	chr6	+	28130400	28134936	downstream	NM_001012455	ZSCAN23	zinc finger and SCAN domain-containing protein 23	4.49927e-06	2.129	down	chr6	-	28400431	28411279
ENST00000562227	ZNF192P1	3.4409e-08	2.42025	down	GENCODE	1113	chr6	+	28130400	28134936	downstream	NM_001163391	ZSCAN12	zinc finger and SCAN domain-containing protein 12	0.000445812	2.31421	down	chr6	-	28356726	28367544
ENST00000562227	ZNF192P1	3.4409e-08	2.42025	down	GENCODE	1113	chr6	+	28130400	28134936	upstream	ENST00000244623	OR2B6	olfactory receptor, family 2, subfamily B, member 6 [Source:HGNC Symbol;Acc:8241]	1.25768e-05	2.77659	up	chr6	+	27925018	27925960
ENST00000562227	ZNF192P1	3.4409e-08	2.42025	down	GENCODE	1113	chr6	+	28130400	28134936	upstream	ENST00000328488	HIST1H3I	histone cluster 1, H3i [Source:HGNC Symbol;Acc:4771]	0.0043588	2.06065	up	chr6	-	27839622	27840099
ENST00000562227	ZNF192P1	3.4409e-08	2.42025	down	GENCODE	1113	chr6	+	28130400	28134936	upstream	ENST00000355981	HIST1H4L	histone cluster 1, H4l [Source:HGNC Symbol;Acc:4791]	0.0103029	3.20876	up	chr6	-	27840925	27841289
ENST00000569149	TUG1	0.000197981	2.04598	down	GENCODE	968	chr22	+	31367424	31369342	downstream	NM_001135825	RNF185	E3 ubiquitin-protein ligase RNF185 isoform 2	3.22085e-05	2.27846	down	chr22	+	31556137	31603005
ENST00000569384	TUG1	0.0176287	2.66335	down	GENCODE	443	chr22	+	31369397	31371465	downstream	NM_001135825	RNF185	E3 ubiquitin-protein ligase RNF185 isoform 2	3.22085e-05	2.27846	down	chr22	+	31556137	31603005
NR_024100	LINC00323	9.97778e-05	5.2468	down	RefSeq	2019	chr21	-	42513426	42519991	upstream	NM_058186	FAM3B	protein FAM3B isoform a precursor	0.00182152	4.69651	up	chr21	+	42688660	42729654
NR_024159	DGCR9	0.00292095	2.013	down	RefSeq	2434	chr22	+	19005346	19007761	downstream	ENST00000537045	DGCR2	DiGeorge syndrome critical region gene 2 [Source:HGNC Symbol;Acc:2845]	0.000250552	2.01033	down	chr22	-	19023794	19109967
NR_024159	DGCR9	0.00292095	2.013	down	RefSeq	2434	chr22	+	19005346	19007761	downstream	NM_005137	DGCR2	integral membrane protein DGCR2/IDD isoform 1 precursor	0.00750475	2.14486	down	chr22	-	19023794	19109967
NR_024159	DGCR9	0.00292095	2.013	down	RefSeq	2434	chr22	+	19005346	19007761	downstream	NM_005984	SLC25A1	tricarboxylate transport protein, mitochondrial isoform a precursor	0.00365194	2.23742	down	chr22	-	19163087	19166338
NR_024280	UNQ6494	0.0112056	3.37384	up	RefSeq	2194	chr9	+	92254697	92334674	upstream	NM_001142287	SEMA4D	semaphorin-4D isoform 2 precursor	0.0116086	2.89004	up	chr9	-	91975705	92094611
NR_024280	UNQ6494	0.0112056	3.37384	up	RefSeq	2194	chr9	+	92254697	92334674	upstream	NM_006705	GADD45G	growth arrest and DNA damage-inducible protein GADD45 gamma	0.000716218	2.54764	up	chr9	+	92219926	92221469
NR_026651	DGCR10	2.68621e-05	4.89996	down	RefSeq	944	chr22	+	19010136	19011063	downstream	ENST00000537045	DGCR2	DiGeorge syndrome critical region gene 2 [Source:HGNC Symbol;Acc:2845]	0.000250552	2.01033	down	chr22	-	19023794	19109967
NR_026651	DGCR10	2.68621e-05	4.89996	down	RefSeq	944	chr22	+	19010136	19011063	downstream	NM_005137	DGCR2	integral membrane protein DGCR2/IDD isoform 1 precursor	0.00750475	2.14486	down	chr22	-	19023794	19109967
NR_026651	DGCR10	2.68621e-05	4.89996	down	RefSeq	944	chr22	+	19010136	19011063	downstream	NM_005984	SLC25A1	tricarboxylate transport protein, mitochondrial isoform a precursor	0.00365194	2.23742	down	chr22	-	19163087	19166338
NR_026821	FAM138B	0.0468877	3.03972	up	RefSeq	1130	chr2	+	114334958	114336429	downstream	NM_025181	SLC35F5	solute carrier family 35 member F5	1.56352e-05	2.37902	down	chr2	-	114471932	114514400
NR_026927	LOC115110	0.0294694	2.28527	up	RefSeq	2216	chr1	-	2481358	2484284	downstream	NM_003036	SKI	ski oncogene	0.00408583	2.20484	down	chr1	+	2160133	2241652
NR_026927	LOC115110	0.0294694	2.28527	up	RefSeq	2216	chr1	-	2481358	2484284	upstream	NM_152371	FAM213B	prostamide/prostaglandin F synthase isoform b	2.08328e-05	2.04887	up	chr1	+	2518188	2522908
NR_033883	LOC339529	2.05875e-06	3.15214	up	RefSeq	1809	chr1	+	244080703	244210619	upstream	NM_005465	AKT3	RAC-gamma serine/threonine-protein kinase isoform 1	0.000242564	3.70282	down	chr1	-	243663020	244006584
NR_037842	LINC00102	0.00019272	7.85697	down	RefSeq	1352	chrX	-	2531031	2533388	upstream	NM_001079855	GYG2	glycogenin-2 isoform a	8.07009e-07	2.93449	down	chrX	+	2746862	2800861
NR_037842	LINC00102	0.00019272	7.85697	down	RefSeq	1352	chrX	-	2531031	2533388	upstream	NM_001141919	XG	glycoprotein Xg isoform 2 precursor	5.29803e-05	2.72516	up	chrX	+	2670092	2734541
NR_037842	LINC00102	0.00019272	7.85697	down	RefSeq	1352	chrX	-	2531031	2533388	upstream	NM_001184703	GYG2	glycogenin-2 isoform d	3.06896e-05	2.44651	down	chrX	+	2746862	2800861
NR_037842	LINC00102	0.00019272	7.85697	down	RefSeq	1352	chrX	-	2531031	2533388	upstream	NM_002414	CD99	CD99 antigen isoform a precursor	0.00194195	3.07114	down	chrX	+	2609227	2659350
NR_037842	LINC00102	0.00019272	7.85697	down	RefSeq	1352	chrX	-	2531031	2533388	upstream	NM_003918	GYG2	glycogenin-2 isoform b	1.09066e-05	2.74474	down	chrX	+	2746862	2800861
NR_038426	LOC100506795	0.00199759	2.09922	down	RefSeq	2860	chr1	-	234663636	234667525	upstream	ENST00000366610	IRF2BP2	interferon regulatory factor 2 binding protein 2 [Source:HGNC Symbol;Acc:21729]	0.0183184	2.0539	down	chr1	-	234740014	234745271
NR_038998	LINC00629	0.000786201	2.97119	down	RefSeq	1333	chrX	+	133684053	133694428	downstream	NM_138819	FAM122C	protein FAM122C isoform 2	0.000337966	2.11719	down	chrX	+	133941222	133988641
TCONS_00005211	XLOC_002221	0.00676977	2.49527	up	LincRNAs identified by Cabili et al	210	chr2	-	99388254	99388552	downstream	ENST00000393487	MGAT4A	mannosyl (alpha-1,3-)-glycoprotein beta-1,4-N-acetylglucosaminyltransferase, isozyme A [Source:HGNC Symbol;Acc:7047]	3.46544e-06	2.5607	up	chr2	-	99235568	99347589
TCONS_00005211	XLOC_002221	0.00676977	2.49527	up	LincRNAs identified by Cabili et al	210	chr2	-	99388254	99388552	upstream	NM_025244	TSGA10	testis-specific gene 10 protein	0.000306343	13.1993	up	chr2	-	99613723	99771187
TCONS_00005211	XLOC_002221	0.00676977	2.49527	up	LincRNAs identified by Cabili et al	210	chr2	-	99388254	99388552	upstream	NM_207362	KIAA1211L	uncharacterized protein C2orf55	0.000409188	6.5769	up	chr2	-	99410308	99552684
TCONS_00013319	XLOC_005968	7.088e-07	5.52524	down	LincRNAs identified by Cabili et al	3365	chr7	+	2479468	2483692	downstream	NM_007353	GNA12	guanine nucleotide-binding protein subunit alpha-12	0.00477247	2.33883	down	chr7	-	2767740	2883959
TCONS_00013319	XLOC_005968	7.088e-07	5.52524	down	LincRNAs identified by Cabili et al	3365	chr7	+	2479468	2483692	downstream	NM_025250	TTYH3	protein tweety homolog 3	8.60784e-05	2.13403	down	chr7	+	2671602	2704436
TCONS_00013320	XLOC_005968	0.0229574	2.3046	down	LincRNAs identified by Cabili et al	3042	chr7	+	2482208	2488305	downstream	NM_007353	GNA12	guanine nucleotide-binding protein subunit alpha-12	0.00477247	2.33883	down	chr7	-	2767740	2883959
TCONS_00013320	XLOC_005968	0.0229574	2.3046	down	LincRNAs identified by Cabili et al	3042	chr7	+	2482208	2488305	downstream	NM_025250	TTYH3	protein tweety homolog 3	8.60784e-05	2.13403	down	chr7	+	2671602	2704436
TCONS_00013321	XLOC_005968	0.000595193	7.2183	down	LincRNAs identified by Cabili et al	2711	chr7	+	2483191	2488106	downstream	NM_007353	GNA12	guanine nucleotide-binding protein subunit alpha-12	0.00477247	2.33883	down	chr7	-	2767740	2883959
TCONS_00013321	XLOC_005968	0.000595193	7.2183	down	LincRNAs identified by Cabili et al	2711	chr7	+	2483191	2488106	downstream	NM_025250	TTYH3	protein tweety homolog 3	8.60784e-05	2.13403	down	chr7	+	2671602	2704436
uc001voi.1	AK123584	0.000523971	2.7565	down	UCSC_knowngene	2796	chr13	-	100143728	100148992	downstream	NM_004951	GPR183	G-protein coupled receptor 183	5.03659e-08	3.15537	up	chr13	-	99946788	99959749
uc002xid.1	AX746690	0.0456178	2.00856	down	UCSC_knowngene	2002	chr20	-	37034659	37045444	downstream	NM_004613	TGM2	protein-glutamine gamma-glutamyltransferase 2 isoform a	0.00127728	2.23975	up	chr20	-	36756863	36793700
uc002xid.1	AX746690	0.0456178	2.00856	down	UCSC_knowngene	2002	chr20	-	37034659	37045444	upstream	NM_001164431	ARHGAP40	rho GTPase-activating protein 40	1.55751e-06	5.2533	down	chr20	+	37230576	37279295
uc003zfx.3	AY343892	0.0156558	3.48873	down	UCSC_knowngene	532	chr9	+	72697	75294	downstream	NM_001193536	DOCK8	dedicator of cytokinesis protein 8 isoform 3	8.26866e-06	2.71475	up	chr9	+	273047	465259
uc003zpr.3	CR627240	3.55211e-05	8.55936	down	UCSC_knowngene	4805	chr9	-	23500688	23672385	upstream	NM_001171195	ELAVL2	ELAV-like protein 2 isoform b	4.27539e-07	31.6214	down	chr9	-	23690102	23821843
uc003zpr.3	CR627240	3.55211e-05	8.55936	down	UCSC_knowngene	4805	chr9	-	23500688	23672385	upstream	NM_004432	ELAVL2	ELAV-like protein 2 isoform a	2.08e-11	21.0985	down	chr9	-	23690102	23826063
uc004dgl.1	BC015977	6.5258e-08	3.41754	down	UCSC_knowngene	271	chrX	-	46185713	46187080	upstream	NM_001146291	ZNF674	zinc finger protein 674 isoform 2	1.02528e-05	2.55361	down	chrX	-	46357159	46404892
