# Supplementary material for: LncRNA and mRNA expression profiles reveal the potential roles of lncRNA contributing to regulating dural penetration in clival chordoma
Source: Aging (Albany NY). 2020 Jun 13;12(11):10809–26. doi: 10.18632/aging.103294 (PMC7346080; doi:10.18632/aging.103294)
Supplement: Supplementary Table 8 [file aging-12-103294-s003..xls]

## Sheet: No-DP vs Serious-DP
Table S8 Antisense LncRNAs and coding genes
Seqname	GeneSymbol	P-value LncRNAs	Fold change LncRNAs	Regulation LncRNAs	Source	RNA length	Chrom	Strand	txStart	txEnd	Genome Relationship	NearbyGene	NearbyGene Symbol	NearbyProtein Name	P-value mRNAs	Fold change mRNAs	Regulation mRNAs	NearbyGene Chrom	NearbyGene Strand	NearbyGene txStart	NearbyGene txEnd
ENST00000371455	RP11-725K16.4	0.000114493	4.61628	down	GENCODE	546	chr11	+	102617698	102702242	intronic antisense	NM_002425	MMP10	stromelysin-2 preproprotein	0.000287271	38.4682	up	chr11	-	102641232	102651359
ENST00000413430	RBMS3-AS3	3.68969e-05	3.97817	down	GENCODE	613	chr3	-	29305684	29332217	intronic antisense	NM_001003792	RBMS3	RNA-binding motif, single-stranded-interacting protein 3 isoform 3	4.82699e-05	3.35215	down	chr3	+	29322802	30051886
ENST00000413430	RBMS3-AS3	3.68969e-05	3.97817	down	GENCODE	613	chr3	-	29305684	29332217	intronic antisense	NM_001003793	RBMS3	RNA-binding motif, single-stranded-interacting protein 3 isoform 1	0.000931902	2.88234	down	chr3	+	29322802	30051886
ENST00000413430	RBMS3-AS3	3.68969e-05	3.97817	down	GENCODE	613	chr3	-	29305684	29332217	intronic antisense	NM_001177712	RBMS3	RNA-binding motif, single-stranded-interacting protein 3 isoform 4	5.519e-09	2.84995	down	chr3	+	29322802	30032809
ENST00000416342	RP4-537K17.2	0.00466867	2.9247	up	GENCODE	429	chr1	-	62580419	62584681	intronic antisense	NM_176877	INADL	inaD-like protein	2.21896e-05	3.5774	down	chr1	+	62208148	62629591
ENST00000420058	RP11-645N11.2	3.78178e-05	3.39134	up	GENCODE	1072	chr7	+	102613968	102629303	intronic antisense	NM_145032	FBXL13	F-box/LRR-repeat protein 13 isoform 1	1.46691e-05	7.44465	up	chr7	-	102453307	102715015
ENST00000421610	AC090627.1	5.44704e-05	5.3615	up	GENCODE	670	chr17	+	46371706	46385191	intronic antisense	NM_003726	SKAP1	src kinase-associated phosphoprotein 1 isoform 1	0.000834707	2.35031	up	chr17	-	46210801	46507594
ENST00000421762	RP11-57H12.3	0.0274263	2.82982	up	GENCODE	2447	chr1	-	95628774	95699538	intronic antisense	NM_152487	TMEM56	transmembrane protein 56	0.000431831	5.18837	down	chr1	+	95582893	95663161
ENST00000421949	RP11-707G14.6	0.00981854	2.23049	down	GENCODE	2176	chr11	-	73594906	73597748	intronic antisense	NM_025155	PAAF1	proteasomal ATPase-associated factor 1 isoform 2	1.73234e-06	2.1867	down	chr11	+	73588013	73638781
ENST00000424769	MFI2-AS1	8.99241e-07	2.10346	down	GENCODE	356	chr3	+	196726330	196731607	intronic antisense	NM_005929	MFI2	melanotransferrin isoform 1 precursor	0.0483678	2.33619	down	chr3	-	196728611	196756687
ENST00000425330	RP11-385J1.2	0.000203991	3.06194	down	GENCODE	508	chr3	-	178466076	178578193	intronic antisense	NM_181361	KCNMB2	calcium-activated potassium channel subunit beta-2	0.0355971	2.02585	up	chr3	+	178254223	178562217
ENST00000425734	RP11-490D19.6	0.0131513	2.03679	down	GENCODE	466	chr9	+	104231660	104243784	intronic antisense	NM_032342	TMEM246	transmembrane protein 246	0.00482793	2.21126	down	chr9	-	104237607	104249475
ENST00000427929	AC104695.3	4.06961e-06	4.36947	down	GENCODE	2850	chr2	-	28607275	28617539	intronic antisense	NM_005253	FOSL2	fos-related antigen 2	6.5765e-09	3.20561	down	chr2	+	28615778	28637516
ENST00000430640	RP11-183I6.2	1.54673e-05	3.5375	down	GENCODE	414	chr9	+	16473185	16476235	intronic antisense	NM_017637	BNC2	zinc finger protein basonuclin-2	0.000783599	2.49064	down	chr9	-	16409500	16870786
ENST00000430766	RP11-75C9.1	0.000134203	9.69672	down	GENCODE	1959	chr9	+	8858133	8861724	intronic antisense	NM_002839	PTPRD	receptor-type tyrosine-protein phosphatase delta isoform 1 precursor	3.64982e-07	4.7986	down	chr9	-	8314245	10612723
ENST00000437040	RP1-67A8.3	0.000116043	2.45413	down	GENCODE	329	chr6	-	107831006	107832925	intronic antisense	NM_018013	SOBP	sine oculis-binding protein homolog	0.000206691	3.03652	down	chr6	+	107811316	107982513
ENST00000437064	MFI2-AS1	2.60837e-07	2.10661	down	GENCODE	306	chr3	+	196730507	196731609	intronic antisense	NM_005929	MFI2	melanotransferrin isoform 1 precursor	0.0483678	2.33619	down	chr3	-	196728611	196756687
ENST00000437947	RP11-61I13.2	0.0308554	2.27254	down	GENCODE	436	chr6	-	39865115	39867847	intronic antisense	NM_015345	DAAM2	disheveled-associated activator of morphogenesis 2 isoform 2	0.0038937	3.20751	down	chr6	+	39760772	39872653
ENST00000439694	AC009264.1	0.00176853	4.78732	down	GENCODE	2160	chr7	-	136468821	136866518	intronic antisense	NM_001006627	CHRM2	muscarinic acetylcholine receptor M2	0.00125943	18.4152	down	chr7	+	136553398	136701771
ENST00000444042	CYP4A22-AS1	0.000184602	3.55405	down	GENCODE	921	chr1	-	47562324	47644943	intronic antisense	NM_178134	CYP4Z1	cytochrome P450 4Z1	0.0121069	6.10151	up	chr1	+	47533159	47583992
ENST00000445878	AC104695.3	3.35361e-06	5.90329	down	GENCODE	3001	chr2	-	28607275	28617539	intronic antisense	NM_005253	FOSL2	fos-related antigen 2	6.5765e-09	3.20561	down	chr2	+	28615778	28637516
ENST00000446355	AC002066.1	4.2887e-06	3.89492	down	GENCODE	516	chr7	-	115878311	116139519	intronic antisense	NM_152829	TES	testin isoform 2	1.4564e-07	2.27012	down	chr7	+	115863004	115898837
ENST00000447119	RP11-790G19.2	2.63507e-07	2.13788	up	GENCODE	613	chr10	-	72976980	72977969	intronic antisense	NM_170744	UNC5B	netrin receptor UNC5B isoform 1 precursor	0.0176167	2.40123	down	chr10	+	72972291	73062635
ENST00000447950	RP11-75C9.1	2.73369e-05	8.01514	down	GENCODE	1668	chr9	+	8858129	8862255	intronic antisense	NM_002839	PTPRD	receptor-type tyrosine-protein phosphatase delta isoform 1 precursor	3.64982e-07	4.7986	down	chr9	-	8314245	10612723
ENST00000451116	AC006019.4	0.00874815	2.0818	down	GENCODE	3044	chr7	-	153789285	153793128	intronic antisense	NM_001039350	DPP6	dipeptidyl aminopeptidase-like protein 6 isoform 3	4.33e-11	23.393	down	chr7	+	153584418	154685995
ENST00000451116	AC006019.4	0.00874815	2.0818	down	GENCODE	3044	chr7	-	153789285	153793128	intronic antisense	NM_130797	DPP6	dipeptidyl aminopeptidase-like protein 6 isoform 1	4.38e-11	31.8443	down	chr7	+	153749776	154685995
ENST00000451496	MAST4-AS1	8.54251e-06	2.15537	down	GENCODE	777	chr5	-	66297210	66299781	intronic antisense	NM_001164664	MAST4	microtubule-associated serine/threonine-protein kinase 4 isoform c	0.00478011	2.36408	down	chr5	+	65892175	66465423
ENST00000455275	AP001439.2	0.00166276	3.54455	down	GENCODE	392	chr21	+	27530408	27548142	intronic antisense	NM_000484	APP	amyloid beta A4 protein isoform a precursor	1.61975e-05	3.37501	down	chr21	-	27252860	27543138
ENST00000455275	AP001439.2	0.00166276	3.54455	down	GENCODE	392	chr21	+	27530408	27548142	intronic antisense	NM_001136129	APP	amyloid beta A4 protein isoform e precursor	0.00017536	4.07293	down	chr21	-	27252860	27543138
ENST00000455275	AP001439.2	0.00166276	3.54455	down	GENCODE	392	chr21	+	27530408	27548142	intronic antisense	NM_001136130	APP	amyloid beta A4 protein isoform f precursor	1.16681e-06	3.8684	down	chr21	-	27252860	27543138
ENST00000455275	AP001439.2	0.00166276	3.54455	down	GENCODE	392	chr21	+	27530408	27548142	intronic antisense	NM_201413	APP	amyloid beta A4 protein isoform b precursor	2.37714e-07	4.42223	down	chr21	-	27252860	27543138
ENST00000455275	AP001439.2	0.00166276	3.54455	down	GENCODE	392	chr21	+	27530408	27548142	intronic antisense	NM_201414	APP	amyloid beta A4 protein isoform c precursor	1.01624e-06	4.48303	down	chr21	-	27252860	27543138
ENST00000455866	AC092171.2	4.78874e-05	3.79208	down	GENCODE	753	chr7	+	5459476	5462753	intronic antisense	NM_001080495	TNRC18	trinucleotide repeat-containing gene 18 protein	0.000673267	2.36778	down	chr7	-	5346422	5463177
ENST00000456289	AC073130.3	0.000290752	3.79477	down	GENCODE	585	chr7	-	115877982	115879305	intronic antisense	NM_152829	TES	testin isoform 2	1.4564e-07	2.27012	down	chr7	+	115863004	115898837
ENST00000456363	AC093110.3	3.8031e-06	3.9375	down	GENCODE	602	chr2	-	54888147	54889929	intronic antisense	NM_003128	SPTBN1	spectrin beta chain, brain 1 isoform 1	0.000182981	2.87778	down	chr2	+	54683453	54898583
ENST00000456904	AP001442.2	5.59702e-06	5.46474	down	GENCODE	430	chr21	+	27306611	27307584	intronic antisense	NM_000484	APP	amyloid beta A4 protein isoform a precursor	1.61975e-05	3.37501	down	chr21	-	27252860	27543138
ENST00000456904	AP001442.2	5.59702e-06	5.46474	down	GENCODE	430	chr21	+	27306611	27307584	intronic antisense	NM_001136129	APP	amyloid beta A4 protein isoform e precursor	0.00017536	4.07293	down	chr21	-	27252860	27543138
ENST00000456904	AP001442.2	5.59702e-06	5.46474	down	GENCODE	430	chr21	+	27306611	27307584	intronic antisense	NM_001136130	APP	amyloid beta A4 protein isoform f precursor	1.16681e-06	3.8684	down	chr21	-	27252860	27543138
ENST00000456904	AP001442.2	5.59702e-06	5.46474	down	GENCODE	430	chr21	+	27306611	27307584	intronic antisense	NM_201413	APP	amyloid beta A4 protein isoform b precursor	2.37714e-07	4.42223	down	chr21	-	27252860	27543138
ENST00000456904	AP001442.2	5.59702e-06	5.46474	down	GENCODE	430	chr21	+	27306611	27307584	intronic antisense	NM_201414	APP	amyloid beta A4 protein isoform c precursor	1.01624e-06	4.48303	down	chr21	-	27252860	27543138
ENST00000461145	RP5-842K16.1	1.44e-11	5.58836	down	GENCODE	1439	chr7	-	141114182	141116190	intronic antisense	NM_001195278	TMEM178B	transmembrane protein 178B precursor	0.00747351	5.68124	down	chr7	+	140774031	141180179
ENST00000464242	RP11-475N22.4	7.1651e-09	5.55659	down	GENCODE	1163	chr3	+	128208054	128216209	intronic antisense	NM_032638	GATA2	endothelial transcription factor GATA-2 isoform 1	0.0162181	3.33201	down	chr3	-	128198264	128212030
ENST00000473958	RP11-475N22.4	0.00093568	3.23852	down	GENCODE	722	chr3	+	128208099	128208929	intronic antisense	NM_032638	GATA2	endothelial transcription factor GATA-2 isoform 1	0.0162181	3.33201	down	chr3	-	128198264	128212030
ENST00000489011	RP11-206M11.7	0.0352169	2.44086	down	GENCODE	551	chr3	+	149002568	149051440	intronic antisense	NM_001184723	TM4SF18	transmembrane 4 L6 family member 18	0.0387086	2.35575	down	chr3	-	149036284	149051259
ENST00000507698	RP11-438D8.2	2e-13	7.83396	down	GENCODE	422	chr3	-	140986194	141085979	intronic antisense	NM_152282	ACPL2	acid phosphatase-like protein 2 precursor	5.5396e-09	3.85226	down	chr3	+	140950681	141013486
ENST00000510905	RP11-302F12.10	0.00322368	4.2733	up	GENCODE	483	chr4	+	25771887	25775199	intronic antisense	NM_015187	SEL1L3	protein sel-1 homolog 3	0.0279629	2.05937	up	chr4	-	25749048	25864610
ENST00000512647	RP11-331K21.1	2.88428e-06	7.67959	down	GENCODE	424	chr5	-	148554070	148656325	intronic antisense	NM_001146337	AFAP1L1	actin filament-associated protein 1-like 1 isoform 2	5.102e-10	4.73566	down	chr5	+	148651400	148721367
ENST00000512647	RP11-331K21.1	2.88428e-06	7.67959	down	GENCODE	424	chr5	-	148554070	148656325	intronic antisense	NM_014945	ABLIM3	actin-binding LIM protein 3	0.00218297	2.00912	down	chr5	+	148521053	148639999
ENST00000512647	RP11-331K21.1	2.88428e-06	7.67959	down	GENCODE	424	chr5	-	148554070	148656325	intronic antisense	NM_152406	AFAP1L1	actin filament-associated protein 1-like 1 isoform 1	1.07119e-06	3.30536	down	chr5	+	148651400	148721367
ENST00000515782	RP11-588P8.1	1.26159e-07	6.68249	down	GENCODE	526	chr4	+	101111189	101136662	intronic antisense	NM_145244	DDIT4L	DNA damage-inducible transcript 4-like protein	0.00501081	8.17746	down	chr4	-	101107026	101111655
ENST00000526953	RP11-47J17.3	0.00347298	2.94896	down	GENCODE	489	chr11	-	12843981	12845214	intronic antisense	NM_021961	TEAD1	transcriptional enhancer factor TEF-1	0.000651435	2.62117	down	chr11	+	12695968	12966284
ENST00000534036	NAV2-AS3	8.417e-10	3.98763	down	GENCODE	598	chr11	-	20000244	20002883	intronic antisense	NM_145117	NAV2	neuron navigator 2 isoform 2	1.05427e-07	6.01493	down	chr11	+	19734880	20143147
ENST00000534036	NAV2-AS3	8.417e-10	3.98763	down	GENCODE	598	chr11	-	20000244	20002883	intronic antisense	NM_182964	NAV2	neuron navigator 2 isoform 1	0.000248277	3.67987	down	chr11	+	19734880	20143147
ENST00000540226	RP11-598F7.3	0.00334096	2.57917	up	GENCODE	586	chr12	-	215689	221016	intronic antisense	NM_001170738	IQSEC3	IQ motif and SEC7 domain-containing protein 3 isoform 1	0.0211553	2.67899	up	chr12	+	176048	287625
ENST00000543907	RP11-881M11.4	0.000378778	3.44707	down	GENCODE	864	chr11	-	60685940	60692869	intronic antisense	NM_017870	TMEM132A	transmembrane protein 132A isoform a precursor	3.0861e-05	2.54091	up	chr11	+	60691912	60704631
ENST00000546678	RP11-570L15.2	0.0472262	2.06504	up	GENCODE	506	chr2	-	144053154	144329674	intronic antisense	NM_018460	ARHGAP15	rho GTPase-activating protein 15	0.00865489	2.6474	up	chr2	+	143886898	144525921
ENST00000549448	RP11-650K20.2	2.6e-12	11.4355	down	GENCODE	413	chr12	+	104213387	104215863	intronic antisense	NM_001031701	NT5DC3	5'-nucleotidase domain-containing protein 3	4.36917e-08	11.0929	down	chr12	-	104166080	104234975
ENST00000552785	RP11-753H16.5	1.45254e-05	6.17099	down	GENCODE	546	chr12	+	54747575	54860769	intronic antisense	NM_001130968	ZNF385A	zinc finger protein 385A isoform b	0.000100536	2.82873	down	chr12	-	54762919	54785083
ENST00000552785	RP11-753H16.5	1.45254e-05	6.17099	down	GENCODE	546	chr12	+	54747575	54860769	intronic antisense	NM_144594	GTSF1	gametocyte-specific factor 1	0.0245393	2.43054	up	chr12	-	54849735	54867386
ENST00000555480	RP11-486O13.2	0.0396683	2.26164	up	GENCODE	566	chr14	+	70653839	70696904	intronic antisense	NM_058240	SLC8A3	sodium/calcium exchanger 3 isoform B precursor	2.27812e-06	3.68096	down	chr14	-	70510933	70655787
ENST00000556328	RP11-507K2.3	0.000161219	2.95104	down	GENCODE	718	chr14	+	89017940	89018837	intronic antisense	NM_007039	PTPN21	tyrosine-protein phosphatase non-receptor type 21	3.37203e-05	2.50646	down	chr14	-	88932121	89021123
ENST00000562009	CTD-2311M21.2	7.1456e-07	4.00505	down	GENCODE	3337	chr15	+	74646796	74656961	intronic antisense	NM_000781	CYP11A1	cholesterol side-chain cleavage enzyme, mitochondrial isoform a precursor	0.0136761	3.14689	down	chr15	-	74630102	74660081
ENST00000564109	CTD-2311M21.2	2.84583e-06	3.5304	down	GENCODE	915	chr15	+	74643108	74654244	intronic antisense	NM_000781	CYP11A1	cholesterol side-chain cleavage enzyme, mitochondrial isoform a precursor	0.0136761	3.14689	down	chr15	-	74630102	74660081
ENST00000565714	RP11-483P21.2	6.23915e-06	6.11201	up	GENCODE	332	chr16	-	83823571	83837133	intronic antisense	NM_001257	CDH13	cadherin-13 isoform 1 preproprotein	0.0446388	2.09001	up	chr16	+	82660398	83830215
ENST00000568391	RP11-390D11.1	0.000914497	2.57848	down	GENCODE	781	chr15	+	72264546	72332606	intronic antisense	NM_006901	MYO9A	unconventional myosin-IXa	2.857e-05	2.1641	down	chr15	-	72118360	72410440
ENST00000585088	RP11-930P14.1	0.0121748	3.82247	up	GENCODE	548	chr8	+	41518803	41521504	intronic antisense	NM_001142445	ANK1	ankyrin-1 isoform 10 precursor	0.00912416	2.58393	up	chr8	-	41510743	41522804
ENST00000585088	RP11-930P14.1	0.0121748	3.82247	up	GENCODE	548	chr8	+	41518803	41521504	intronic antisense	NM_020476	ANK1	ankyrin-1 isoform 1	0.000113984	3.95268	up	chr8	-	41510743	41655140
ENST00000585088	RP11-930P14.1	0.0121748	3.82247	up	GENCODE	548	chr8	+	41518803	41521504	intronic antisense	NM_020480	ANK1	ankyrin-1 isoform 7 precursor	0.00186833	2.27272	up	chr8	-	41510743	41522804
NR_028033	FAS	0.0346646	2.08834	up	RefSeq	2583	chr10	+	90750287	90775542	intronic antisense	NM_001141945	ACTA2	actin, aortic smooth muscle	0.0397666	3.7076	up	chr10	-	90694830	90751147
NR_028034	FAS	4.23362e-06	2.44786	up	RefSeq	2445	chr10	+	90750287	90775542	intronic antisense	NM_001141945	ACTA2	actin, aortic smooth muscle	0.0397666	3.7076	up	chr10	-	90694830	90751147
NR_033853	LOC283194	0.00201945	2.11406	down	RefSeq	2603	chr11	-	58701115	58825925	intronic antisense	NM_080661	GLYATL1	glycine N-acyltransferase-like protein 1 isoform 1	4.4873e-05	3.29368	down	chr11	+	58710721	58724543
NR_037884	LOC100507053	0.0427145	2.36869	up	RefSeq	4827	chr4	+	100010007	100222513	intronic antisense	NM_000672	ADH6	alcohol dehydrogenase 6 isoform 2	0.0029335	2.91424	up	chr4	-	100125878	100140403
NR_038210	SAMD12-AS1	1.32628e-05	3.00029	down	RefSeq	701	chr8	+	119633239	119738306	intronic antisense	NM_001101676	SAMD12	sterile alpha motif domain-containing protein 12 isoform a	1.78947e-06	2.29789	down	chr8	-	119201694	119634184
NR_038229	NTRK3-AS1	0.0027767	7.36057	up	RefSeq	2663	chr15	+	88795960	88814297	intronic antisense	NM_001007156	NTRK3	NT-3 growth factor receptor isoform c precursor	0.000452069	2.31114	down	chr15	-	88520595	88799962
NR_038266	MYLK-AS1	1.23037e-05	2.20209	up	RefSeq	771	chr3	+	123304402	123349666	intronic antisense	NM_053032	MYLK	myosin light chain kinase, smooth muscle isoform 8	0.0126402	2.00144	up	chr3	-	123331142	123339530
NR_038908	FLI1-AS1	0.0285352	2.50632	up	RefSeq	1319	chr11	-	128561566	128565918	intronic antisense	NM_001167681	FLI1	Friend leukemia integration 1 transcription factor isoform 2	0.000180109	2.61847	up	chr11	+	128563810	128683162
NR_038908	FLI1-AS1	0.0285352	2.50632	up	RefSeq	1319	chr11	-	128561566	128565918	intronic antisense	NM_002017	FLI1	Friend leukemia integration 1 transcription factor isoform 1	0.000962189	3.1488	up	chr11	+	128563812	128683162
NR_038976	LOC339874	0.00227056	2.33241	down	RefSeq	1995	chr3	-	131043935	131100319	intronic antisense	NM_001146003	NEK11	serine/threonine-protein kinase Nek11 isoform 3	0.0131214	3.00366	up	chr3	+	130745693	131069309
NR_038976	LOC339874	0.00227056	2.33241	down	RefSeq	1995	chr3	-	131043935	131100319	intronic antisense	NM_024800	NEK11	serine/threonine-protein kinase Nek11 isoform 1	0.0340117	2.50764	up	chr3	+	130745693	131069309
NR_046096	LOC283692	8.34473e-06	3.31794	down	RefSeq	2168	chr15	+	83316520	83361572	intronic antisense	NM_004644	AP3B2	AP-3 complex subunit beta-2	0.00252191	7.44216	down	chr15	-	83328032	83378635
NR_046103	LOC349160	3.68351e-08	6.55641	down	RefSeq	1538	chr7	-	136583519	136849088	intronic antisense	NM_001006627	CHRM2	muscarinic acetylcholine receptor M2	0.00125943	18.4152	down	chr7	+	136553398	136701771
NR_046527	PCDH9-AS2	0.0194436	2.75756	down	RefSeq	538	chr13	+	67399300	67489163	intronic antisense	NM_020403	PCDH9	protocadherin-9 isoform 2 precursor	0.00111858	2.18997	down	chr13	-	66876965	67804468
NR_046527	PCDH9-AS2	0.0194436	2.75756	down	RefSeq	538	chr13	+	67399300	67489163	intronic antisense	NM_203487	PCDH9	protocadherin-9 isoform 1 precursor	0.0087843	2.53203	down	chr13	-	66876965	67804468
NR_046639	PHEX-AS1	2.73629e-06	6.46899	down	RefSeq	1931	chrX	-	22180848	22191100	intronic antisense	NM_000444	PHEX	phosphate-regulating neutral endopeptidase	0.0222294	2.4075	down	chrX	+	22050920	22266478
NR_047543	CDKN2B-AS1	0.000322687	2.40097	up	RefSeq	1939	chr9	+	21994789	22121093	intronic antisense	NM_004936	CDKN2B	cyclin-dependent kinase 4 inhibitor B isoform 1	0.000279901	4.3669	down	chr9	-	22002901	22009312
NR_047543	CDKN2B-AS1	0.000322687	2.40097	up	RefSeq	1939	chr9	+	21994789	22121093	intronic antisense	NM_078487	CDKN2B	cyclin-dependent kinase 4 inhibitor B isoform 2	7.25369e-05	9.07906	down	chr9	-	22002901	22009312
uc001oqx.1	BC073927	0.0076974	2.4045	down	UCSC_knowngene	1588	chr11	-	71505408	71524905	intronic antisense	NM_152563	FAM86C1	protein FAM86C1 isoform 2	0.0272876	2.05733	down	chr11	+	71498556	71512280
uc001vhy.3	BC032915	0.0123119	2.20953	down	UCSC_knowngene	569	chr13	+	60587436	60599286	intronic antisense	NM_001042517	DIAPH3	protein diaphanous homolog 3 isoform a	0.00134213	6.33632	down	chr13	-	60239722	60738119
uc002kmi.3	BC094703	0.000202029	2.73799	down	UCSC_knowngene	2250	chr18	+	3603735	3608323	intronic antisense	NM_004746	DLGAP1	disks large-associated protein 1 isoform 1	1.08571e-05	4.07068	down	chr18	-	3496029	4455266
uc003idi.4	AF085995	0.00255255	2.2276	up	UCSC_knowngene	456	chr4	+	120433527	120473183	intronic antisense	NM_001083	PDE5A	cGMP-specific 3',5'-cyclic phosphodiesterase isoform 1	0.000115802	2.80047	down	chr4	-	120415549	120549981
uc003idi.4	AF085995	0.00255255	2.2276	up	UCSC_knowngene	456	chr4	+	120433527	120473183	intronic antisense	NM_033430	PDE5A	cGMP-specific 3',5'-cyclic phosphodiesterase isoform 2	0.00033413	2.71704	down	chr4	-	120415549	120548442
AK094629		8.12675e-05	4.8585	down	LincRNAs identified by Khalil et al	2028	chr6	-	161411345	161413374	natural antisense	NM_006724	MAP3K4	mitogen-activated protein kinase kinase kinase 4 isoform b	1.13077e-07	2.94964	down	chr6	+	161412821	161538417
ENST00000372490	RP11-247A12.2	0.00045564	2.71787	down	GENCODE	2047	chr9	+	131939049	131972827	natural antisense	NM_203434	IER5L	immediate early response gene 5-like protein	4.40991e-06	3.75447	down	chr9	-	131937830	131940540
ENST00000394864	RP11-152N13.5	0.000832636	2.89416	up	GENCODE	635	chr10	+	75012926	75014107	natural antisense	NM_145170	TTC18	tetratricopeptide repeat protein 18	0.0208025	2.90041	up	chr10	-	75013515	75118617
ENST00000415244	MFI2-AS1	1.24607e-07	2.11727	down	GENCODE	951	chr3	+	196729776	196731615	natural antisense	NM_005929	MFI2	melanotransferrin isoform 1 precursor	0.0483678	2.33619	down	chr3	-	196728611	196756687
ENST00000416689	RP5-848E13.3	2.74e-11	4.22022	down	GENCODE	3075	chr1	+	43424774	43442099	natural antisense	NM_006516	SLC2A1	solute carrier family 2, facilitated glucose transporter member 1	3.56127e-06	4.74086	down	chr1	-	43391045	43424847
ENST00000418062	AC010680.1	0.000436583	2.87346	down	GENCODE	544	chr2	+	179501286	179510650	natural antisense	NM_003319	TTN	titin isoform N2-B	0.000779922	8.73765	down	chr2	-	179390717	179672150
ENST00000418062	AC010680.1	0.000436583	2.87346	down	GENCODE	544	chr2	+	179501286	179510650	natural antisense	NM_133378	TTN	titin isoform N2-A	0.00961168	2.1364	down	chr2	-	179390717	179672150
ENST00000418062	AC010680.1	0.000436583	2.87346	down	GENCODE	544	chr2	+	179501286	179510650	natural antisense	NM_133432	TTN	titin isoform novex-1	0.000578611	8.75463	down	chr2	-	179390717	179672150
ENST00000418062	AC010680.1	0.000436583	2.87346	down	GENCODE	544	chr2	+	179501286	179510650	natural antisense	NM_133437	TTN	titin isoform novex-2	1.30592e-07	6.16016	down	chr2	-	179390717	179672150
ENST00000420293	RP11-61I13.3	6.11813e-06	4.50433	down	GENCODE	440	chr6	-	39856649	39865156	natural antisense	NM_015345	DAAM2	disheveled-associated activator of morphogenesis 2 isoform 2	0.0038937	3.20751	down	chr6	+	39760772	39872653
ENST00000425233	RP5-977B1.7	1.08365e-05	2.8843	down	GENCODE	443	chr20	-	35153903	35201387	natural antisense	NM_183006	DLGAP4	disks large-associated protein 4 isoform b	6.32499e-06	3.34232	down	chr20	+	35090141	35157040
ENST00000425503	RP1-142L7.5	4.42759e-05	4.11564	down	GENCODE	544	chr6	+	112475966	112479534	natural antisense	NM_001105206	LAMA4	laminin subunit alpha-4 isoform 1 precursor	7.62583e-05	3.46093	down	chr6	-	112429133	112575917
ENST00000425503	RP1-142L7.5	4.42759e-05	4.11564	down	GENCODE	544	chr6	+	112475966	112479534	natural antisense	NM_002290	LAMA4	laminin subunit alpha-4 isoform 2 precursor	6.24388e-05	3.22822	down	chr6	-	112429133	112575917
ENST00000425873	AC005013.5	0.00106415	8.46282	down	GENCODE	571	chr7	+	28995865	28998864	natural antisense	NM_014817	TRIL	TLR4 interactor with leucine rich repeats precursor	0.0195977	6.06242	down	chr7	-	28992973	28998029
ENST00000428289	RP11-196G18.3	0.010124	3.60318	up	GENCODE	3543	chr1	-	149757214	149764576	natural antisense	NM_000566	FCGR1A	high affinity immunoglobulin gamma Fc receptor I precursor	0.00648195	3.99606	up	chr1	+	149754249	149764074
ENST00000430525	TTC28-AS1	0.0016995	2.29833	down	GENCODE	524	chr22	+	28315471	28389493	natural antisense	NM_001145418	TTC28	tetratricopeptide repeat protein 28	3.11669e-08	2.02904	down	chr22	-	28374001	29075853
ENST00000430595	RP11-61I13.3	8.48021e-08	3.2685	down	GENCODE	638	chr6	-	39856565	39865129	natural antisense	NM_015345	DAAM2	disheveled-associated activator of morphogenesis 2 isoform 2	0.0038937	3.20751	down	chr6	+	39760772	39872653
ENST00000433005	AC003075.4	0.00186561	2.44716	up	GENCODE	540	chr7	-	17325898	17338981	natural antisense	NM_001621	AHR	aryl hydrocarbon receptor precursor	0.000509245	2.40052	up	chr7	+	17338275	17385775
ENST00000433238	RP5-977B1.12	0.0328645	2.07922	down	GENCODE	593	chr20	-	35141011	35154533	natural antisense	NM_183006	DLGAP4	disks large-associated protein 4 isoform b	6.32499e-06	3.34232	down	chr20	+	35090141	35157040
ENST00000435695	AC002454.1	6.38711e-06	10.8148	down	GENCODE	432	chr7	+	92465796	92546501	natural antisense	NM_001145306	CDK6	cyclin-dependent kinase 6	0.000319709	2.73557	down	chr7	-	92234234	92465941
ENST00000436594	AC005013.5	8.21211e-05	9.23163	down	GENCODE	588	chr7	+	28997282	28998961	natural antisense	NM_014817	TRIL	TLR4 interactor with leucine rich repeats precursor	0.0195977	6.06242	down	chr7	-	28992973	28998029
ENST00000437128	RP4-620F22.2	0.000260756	3.7754	up	GENCODE	324	chr1	+	89726264	89735437	natural antisense	NM_052942	GBP5	guanylate-binding protein 5	0.0320076	4.3152	up	chr1	-	89724633	89738544
ENST00000439295	RP3-499B10.4	0.00790391	2.14252	down	GENCODE	597	chrX	+	18910861	18912615	natural antisense	NM_000292	PHKA2	phosphorylase b kinase regulatory subunit alpha, liver isoform	2.14038e-05	2.03821	down	chrX	-	18910415	19002480
ENST00000444879	CHL1-AS2	1.04182e-06	5.13442	up	GENCODE	488	chr3	-	237440	238882	natural antisense	NM_006614	CHL1	neural cell adhesion molecule L1-like protein isoform 1 precursor	0.000122979	6.50615	up	chr3	+	238278	451097
ENST00000445990	LL0XNC01-250H12.3	0.000731101	3.41857	down	GENCODE	632	chrX	+	102752450	102755245	natural antisense	NM_080879	RAB40A	ras-related protein Rab-40A	0.0150418	3.02912	down	chrX	-	102754680	102774417
ENST00000447880	AC016999.2	1.37623e-06	4.2283	down	GENCODE	452	chr2	-	239335717	239336370	natural antisense	NM_001040445	ASB1	ankyrin repeat and SOCS box protein 1	3.36786e-06	2.23454	down	chr2	+	239335625	239360891
ENST00000449419	RP11-429G19.2	4.40797e-05	3.27117	up	GENCODE	948	chr10	-	97634840	97667532	natural antisense	NM_001776	ENTPD1	ectonucleoside triphosphate diphosphohydrolase 1 isoform 1	0.0123232	2.05019	up	chr10	+	97515672	97637023
ENST00000451839	CHL1-AS2	3.27843e-08	6.5809	up	GENCODE	508	chr3	-	237440	238542	natural antisense	NM_006614	CHL1	neural cell adhesion molecule L1-like protein isoform 1 precursor	0.000122979	6.50615	up	chr3	+	238278	451097
ENST00000452919	CHL1-AS2	1.10228e-06	5.82555	up	GENCODE	726	chr3	-	237440	239024	natural antisense	NM_006614	CHL1	neural cell adhesion molecule L1-like protein isoform 1 precursor	0.000122979	6.50615	up	chr3	+	238278	451097
ENST00000457996	RP11-439A17.9	0.00624065	3.6688	up	GENCODE	3543	chr1	+	120925633	120933000	natural antisense	NM_001004340	FCGR1B	high affinity immunoglobulin gamma Fc receptor IB isoform 2 precursor	0.000394111	4.43123	up	chr1	-	120926127	120935944
ENST00000457996	RP11-439A17.9	0.00624065	3.6688	up	GENCODE	3543	chr1	+	120925633	120933000	natural antisense	NM_001017986	FCGR1B	high affinity immunoglobulin gamma Fc receptor IB isoform 1 precursor	0.000901278	4.67003	up	chr1	-	120926127	120935944
ENST00000464125	RP11-475O23.3	0.000686452	5.97049	up	GENCODE	821	chr3	+	58592806	58620167	natural antisense	NM_138805	FAM3D	protein FAM3D precursor	0.00348676	34.1502	up	chr3	-	58619669	58652561
ENST00000467537	RP5-894A10.2	0.00519716	2.10851	up	GENCODE	770	chr7	-	141352180	141356610	natural antisense	NM_018238	AGK	acylglycerol kinase, mitochondrial precursor	0.000553856	3.76533	down	chr7	+	141251077	141354209
ENST00000474886	CFLAR-AS1	0.00286296	2.05891	up	GENCODE	223	chr2	-	202005006	202008919	natural antisense	NM_001127184	CFLAR	CASP8 and FADD-like apoptosis regulator isoform 2	0.00534794	2.34944	up	chr2	+	201980876	202006323
ENST00000502435	CTB-22K21.2	3.83557e-06	5.61291	down	GENCODE	510	chr17	-	48704392	48709301	natural antisense	NM_198378	CACNA1G	voltage-dependent T-type calcium channel subunit alpha-1G isoform 9	4.04376e-05	3.53149	down	chr17	+	48638428	48704832
ENST00000502435	CTB-22K21.2	3.83557e-06	5.61291	down	GENCODE	510	chr17	-	48704392	48709301	natural antisense	NM_198379	CACNA1G	voltage-dependent T-type calcium channel subunit alpha-1G isoform 7	0.0136346	3.62099	up	chr17	+	48638428	48704832
ENST00000502435	CTB-22K21.2	3.83557e-06	5.61291	down	GENCODE	510	chr17	-	48704392	48709301	natural antisense	NM_198384	CACNA1G	voltage-dependent T-type calcium channel subunit alpha-1G isoform 8	0.00663819	3.26989	down	chr17	+	48638428	48704832
ENST00000502827	RP11-346A9.1	0.000995942	4.54978	down	GENCODE	786	chr5	-	128795251	128796382	natural antisense	NM_133638	ADAMTS19	A disintegrin and metalloproteinase with thrombospondin motifs 19 preproprotein	0.00451952	6.80287	down	chr5	+	128796102	129074376
ENST00000503483	CTC-281B15.1	0.000289457	3.47238	down	GENCODE	560	chr5	-	80499914	80597304	natural antisense	NM_006909	RASGRF2	ras-specific guanine nucleotide-releasing factor 2	1.85607e-05	3.97876	down	chr5	+	80256507	80525981
ENST00000505694	CTC-459I6.1	0.0230182	2.48567	down	GENCODE	535	chr5	-	80243515	80256726	natural antisense	NM_006909	RASGRF2	ras-specific guanine nucleotide-releasing factor 2	1.85607e-05	3.97876	down	chr5	+	80256507	80525981
ENST00000506340	CTC-338M12.4	0.00402534	3.12637	down	GENCODE	687	chr5	+	180673524	180684245	natural antisense	NM_032765	TRIM52	tripartite motif-containing protein 52	0.00129	3.91056	down	chr5	-	180683385	180688119
ENST00000511495	CTC-281B15.1	1.43768e-05	3.96135	down	GENCODE	585	chr5	-	80505919	80597316	natural antisense	NM_006909	RASGRF2	ras-specific guanine nucleotide-releasing factor 2	1.85607e-05	3.97876	down	chr5	+	80256507	80525981
ENST00000512486	CTD-2154I11.2	0.00222582	2.62455	down	GENCODE	809	chr5	-	95036952	95067999	natural antisense	NM_014899	RHOBTB3	rho-related BTB domain-containing protein 3	3.16717e-05	6.19835	down	chr5	+	95066849	95132071
ENST00000513221	CTC-426B10.1	0.0013183	2.15284	down	GENCODE	523	chr5	+	111066085	111067878	natural antisense	NM_001142477	NREP	neuronal regeneration-related protein isoform a	2.94959e-05	2.72527	down	chr5	-	111064999	111093793
ENST00000514661	RP11-79P5.2	0.00625747	4.44033	down	GENCODE	424	chr5	+	72742183	72742811	natural antisense	NM_004472	FOXD1	forkhead box protein D1	0.00778448	6.87185	down	chr5	-	72742084	72744352
ENST00000514696	CTD-2269F5.1	0.00323	3.10483	down	GENCODE	582	chr5	+	83680244	83695469	natural antisense	NM_005711	EDIL3	EGF-like repeat and discoidin I-like domain-containing protein 3 precursor	0.00352497	3.63731	down	chr5	-	83238125	83680611
ENST00000522416	KB-1639H6.2	0.000124481	5.96896	down	GENCODE	414	chr8	-	104032414	104033656	natural antisense	NM_001695	ATP6V1C1	V-type proton ATPase subunit C 1	0.00547779	2.02224	down	chr8	+	104033247	104085285
ENST00000524714	CTD-2313N18.5	6.6623e-09	3.35168	down	GENCODE	447	chr11	-	71507007	71524492	natural antisense	NM_152563	FAM86C1	protein FAM86C1 isoform 2	0.0272876	2.05733	down	chr11	+	71498556	71512280
ENST00000526310	RP11-864G5.3	1.8679e-06	2.27835	down	GENCODE	628	chr11	-	102100581	102101653	natural antisense	NM_001195044	YAP1	yorkie homolog isoform 3	4.05327e-05	2.76661	down	chr11	+	101981191	102104154
ENST00000526310	RP11-864G5.3	1.8679e-06	2.27835	down	GENCODE	628	chr11	-	102100581	102101653	natural antisense	NM_001195045	YAP1	yorkie homolog isoform 4	3.53554e-06	2.83546	down	chr11	+	101983170	102104154
ENST00000526310	RP11-864G5.3	1.8679e-06	2.27835	down	GENCODE	628	chr11	-	102100581	102101653	natural antisense	NM_006106	YAP1	yorkie homolog isoform 2	0.00204744	3.23256	down	chr11	+	101981191	102104154
ENST00000526642	NAV2-AS1	3.3476e-05	2.15644	down	GENCODE	660	chr11	-	20141229	20142178	natural antisense	NM_001111019	NAV2	neuron navigator 2 isoform 4	3.09208e-05	4.74411	down	chr11	+	20044101	20143147
ENST00000526642	NAV2-AS1	3.3476e-05	2.15644	down	GENCODE	660	chr11	-	20141229	20142178	natural antisense	NM_145117	NAV2	neuron navigator 2 isoform 2	1.05427e-07	6.01493	down	chr11	+	19734880	20143147
ENST00000526642	NAV2-AS1	3.3476e-05	2.15644	down	GENCODE	660	chr11	-	20141229	20142178	natural antisense	NM_182964	NAV2	neuron navigator 2 isoform 1	0.000248277	3.67987	down	chr11	+	19734880	20143147
ENST00000530510	RP11-702H23.6	7.82247e-05	6.14354	up	GENCODE	609	chr11	+	74166392	74167870	natural antisense	NM_005472	KCNE3	potassium voltage-gated channel subfamily E member 3	0.000222208	6.17688	up	chr11	-	74165885	74178600
ENST00000535363	RP11-27M24.1	0.00819971	2.24743	down	GENCODE	533	chr16	+	10623296	10625939	natural antisense	NM_001424	EMP2	epithelial membrane protein 2 precursor	1.38347e-06	3.85462	down	chr16	-	10622278	10674539
ENST00000539568	RP11-283I3.2	1.77789e-06	17.2426	down	GENCODE	694	chr12	+	312807	314189	natural antisense	NM_001122848	SLC6A12	sodium- and chloride-dependent betaine transporter	0.00212851	3.54235	down	chr12	-	299242	323371
ENST00000542980	RP11-76C10.5	0.00155829	2.41593	down	GENCODE	1277	chr12	-	131474682	131478521	natural antisense	NM_198827	GPR133	probable G-protein coupled receptor 133 precursor	0.00552489	3.93193	down	chr12	+	131438451	131626008
ENST00000548626	RP11-1143G9.4	0.00162762	2.81986	up	GENCODE	429	chr12	-	69746948	69747436	natural antisense	NM_000239	LYZ	lysozyme C precursor	0.0137991	2.87285	up	chr12	+	69742133	69748013
ENST00000548900	RP11-1143G9.4	9.62081e-05	7.18558	up	GENCODE	599	chr12	-	69747272	69748005	natural antisense	NM_000239	LYZ	lysozyme C precursor	0.0137991	2.87285	up	chr12	+	69742133	69748013
ENST00000552269	RP11-493L12.2	1.1599e-09	4.58501	up	GENCODE	673	chr12	-	47599680	47610191	natural antisense	NM_138371	PCED1B	protein FAM113B	3.94575e-06	3.55499	up	chr12	+	47610051	47630443
ENST00000552785	RP11-753H16.5	1.45254e-05	6.17099	down	GENCODE	546	chr12	+	54747575	54860769	natural antisense	NM_002205	ITGA5	integrin alpha-5 precursor	3.04503e-05	3.18861	down	chr12	-	54789044	54813050
ENST00000552975	RP11-493L12.2	0.00281021	4.55759	up	GENCODE	378	chr12	-	47599723	47610239	natural antisense	NM_138371	PCED1B	protein FAM113B	3.94575e-06	3.55499	up	chr12	+	47610051	47630443
ENST00000552990	RP11-493L12.2	8.62338e-06	4.66282	up	GENCODE	654	chr12	-	47599683	47610227	natural antisense	NM_138371	PCED1B	protein FAM113B	3.94575e-06	3.55499	up	chr12	+	47610051	47630443
ENST00000556578	RP4-647C14.3	0.00029746	4.16852	up	GENCODE	777	chr14	-	73738889	73740789	natural antisense	NM_173462	PAPLN	papilin precursor	0.0273132	2.22953	down	chr14	+	73704204	73741347
ENST00000556583	RP11-770J1.3	0.0239499	2.89564	down	GENCODE	234	chr11	-	118390330	118401809	natural antisense	NM_001144034	TMEM25	transmembrane protein 25 isoform 2 precursor	0.000459961	2.47979	down	chr11	+	118401802	118406550
ENST00000556583	RP11-770J1.3	0.0239499	2.89564	down	GENCODE	234	chr11	-	118390330	118401809	natural antisense	NM_001144036	TMEM25	transmembrane protein 25 isoform 3 precursor	5.38724e-05	2.10806	down	chr11	+	118401802	118406550
ENST00000556583	RP11-770J1.3	0.0239499	2.89564	down	GENCODE	234	chr11	-	118390330	118401809	natural antisense	NM_001144037	TMEM25	transmembrane protein 25 isoform 4 precursor	0.00283482	2.46314	down	chr11	+	118401802	118417313
ENST00000558441	RP11-758N13.1	0.00424788	11.6979	up	GENCODE	1738	chr15	-	33009470	33011208	natural antisense	NM_001191323	GREM1	gremlin-1 isoform 2 precursor	0.0371677	4.28399	up	chr15	+	33010204	33026870
ENST00000559468	RP11-654A16.3	3.2e-12	13.2612	down	GENCODE	588	chr15	-	99497377	99646030	natural antisense	NM_015286	SYNM	synemin isoform B	0.000180569	10.4175	down	chr15	+	99645285	99675800
ENST00000559468	RP11-654A16.3	3.2e-12	13.2612	down	GENCODE	588	chr15	-	99497377	99646030	natural antisense	NM_145728	SYNM	synemin isoform A	2.82208e-05	9.2369	down	chr15	+	99645285	99675800
ENST00000562696	CTD-2033A16.1	0.00881186	3.01604	up	GENCODE	575	chr16	+	69743776	69744486	natural antisense	NM_000903	NQO1	NAD(P)H dehydrogenase [quinone] 1 isoform a	0.00125182	4.35307	up	chr16	-	69743303	69760533
ENST00000562696	CTD-2033A16.1	0.00881186	3.01604	up	GENCODE	575	chr16	+	69743776	69744486	natural antisense	NM_001025434	NQO1	NAD(P)H dehydrogenase [quinone] 1 isoform c	0.00100674	5.24804	up	chr16	-	69743303	69760533
ENST00000563278	RP11-817O13.8	0.000518819	2.58868	down	GENCODE	1430	chr15	+	75660495	75661925	natural antisense	NM_006715	MAN2C1	alpha-mannosidase 2C1 isoform 1	0.00361442	2.04636	down	chr15	-	75648132	75660968
ENST00000566974	RP11-6O2.4	0.000102696	2.49001	down	GENCODE	2562	chr15	-	99669036	99672011	natural antisense	NM_015286	SYNM	synemin isoform B	0.000180569	10.4175	down	chr15	+	99645285	99675800
ENST00000566974	RP11-6O2.4	0.000102696	2.49001	down	GENCODE	2562	chr15	-	99669036	99672011	natural antisense	NM_145728	SYNM	synemin isoform A	2.82208e-05	9.2369	down	chr15	+	99645285	99675800
ENST00000571775	RP1-59D14.1	0.00761359	3.20334	down	GENCODE	1065	chr17	+	2288140	2289958	natural antisense	NM_020310	MNT	max-binding protein MNT	0.0026797	3.00138	down	chr17	-	2287353	2304258
ENST00000574212	AF001548.5	0.000207665	2.49052	up	GENCODE	836	chr16	+	15820530	15826850	natural antisense	NM_001040113	MYH11	myosin-11 isoform SM2B	0.0147836	7.06402	up	chr16	-	15796991	15950887
ENST00000574212	AF001548.5	0.000207665	2.49052	up	GENCODE	836	chr16	+	15820530	15826850	natural antisense	NM_001040114	MYH11	myosin-11 isoform SM1B	0.000900722	5.18036	up	chr16	-	15796991	15950887
ENST00000577364	RP11-862L9.3	0.0127855	2.4782	down	GENCODE	563	chr18	+	74690788	74691509	natural antisense	NM_001025090	MBP	myelin basic protein isoform 3	0.00890455	2.81484	down	chr18	-	74690788	74729055
ENST00000577364	RP11-862L9.3	0.0127855	2.4782	down	GENCODE	563	chr18	+	74690788	74691509	natural antisense	NM_002385	MBP	myelin basic protein isoform 2	0.00793005	4.4365	down	chr18	-	74690788	74729055
ENST00000580511	BVES-AS1	0.00129408	3.24048	down	GENCODE	853	chr6	+	105584182	105616776	natural antisense	NM_147147	BVES	blood vessel epicardial substance	0.0142536	2.4003	down	chr6	-	105544698	105584221
ENST00000585189	RP11-192H23.5	1.47494e-06	2.57121	down	GENCODE	298	chr17	+	26900134	26901261	natural antisense	NM_005165	ALDOC	fructose-bisphosphate aldolase C	5.21485e-07	3.54654	down	chr17	-	26900132	26903951
NR_002811	NPHP3-AS1	0.0127292	2.5644	down	RefSeq	2507	chr3	+	132441185	132593050	natural antisense	NM_153240	NPHP3	nephrocystin-3	0.00143129	2.34516	down	chr3	-	132399452	132441303
NR_015375	FLJ35024	0.000755579	2.68606	down	RefSeq	928	chr9	-	2535654	2622373	natural antisense	NM_001018056	VLDLR	very low-density lipoprotein receptor isoform b precursor	1.46141e-08	5.42209	down	chr9	+	2621792	2654485
NR_015375	FLJ35024	0.000755579	2.68606	down	RefSeq	928	chr9	-	2535654	2622373	natural antisense	NM_003383	VLDLR	very low-density lipoprotein receptor isoform a precursor	5.58274e-05	6.55263	down	chr9	+	2621792	2654485
NR_024334	FUT8-AS1	0.000312455	7.72246	up	RefSeq	2026	chr14	-	65877310	65879335	natural antisense	NM_004480	FUT8	alpha-(1,6)-fucosyltransferase isoform b	0.0176493	2.33325	up	chr14	+	65877309	66210839
NR_026544	PCED1B-AS1	0.000216458	2.54653	up	RefSeq	2502	chr12	-	47602202	47610226	natural antisense	NM_138371	PCED1B	protein FAM113B	3.94575e-06	3.55499	up	chr12	+	47610051	47630443
NR_027140	TNFRSF10B	0.00781864	2.19734	down	RefSeq	3961	chr8	-	22877647	22926700	natural antisense	NM_001160036	RHOBTB2	rho-related BTB domain-containing protein 2 isoform 1	0.0327259	2.34824	down	chr8	+	22844929	22877710
NR_027140	TNFRSF10B	0.00781864	2.19734	down	RefSeq	3961	chr8	-	22877647	22926700	natural antisense	NM_001160037	RHOBTB2	rho-related BTB domain-containing protein 2 isoform 2	0.0110982	2.74217	down	chr8	+	22853360	22877710
NR_027140	TNFRSF10B	0.00781864	2.19734	down	RefSeq	3961	chr8	-	22877647	22926700	natural antisense	NM_015178	RHOBTB2	rho-related BTB domain-containing protein 2 isoform 3	0.00730021	2.09193	down	chr8	+	22857091	22877710
NR_027689	CERKL	0.0279203	3.50137	up	RefSeq	3030	chr2	-	182401400	182521834	natural antisense	NM_000885	ITGA4	integrin alpha-4 precursor	2.12732e-06	2.39003	up	chr2	+	182321618	182402468
NR_027690	CERKL	0.000139908	3.18019	up	RefSeq	3162	chr2	-	182401400	182521834	natural antisense	NM_000885	ITGA4	integrin alpha-4 precursor	2.12732e-06	2.39003	up	chr2	+	182321618	182402468
NR_029379	PHKA2-AS1	0.000313124	5.73539	down	RefSeq	1332	chrX	+	18908413	18913093	natural antisense	NM_000292	PHKA2	phosphorylase b kinase regulatory subunit alpha, liver isoform	2.14038e-05	2.03821	down	chrX	-	18910415	19002480
NR_033313	BDNF-AS	0.00246216	2.49178	up	RefSeq	1279	chr11	+	27528398	27719718	natural antisense	NM_170734	BDNF	brain-derived neurotrophic factor isoform c preproprotein	0.0214559	6.39774	up	chr11	-	27676441	27721214
NR_033314	BDNF-AS	0.023981	2.18503	down	RefSeq	1478	chr11	+	27528398	27699350	natural antisense	NM_170734	BDNF	brain-derived neurotrophic factor isoform c preproprotein	0.0214559	6.39774	up	chr11	-	27676441	27721214
NR_033967	SLC2A1-AS1	9.32594e-05	3.13132	down	RefSeq	1138	chr1	+	43424719	43449029	natural antisense	NM_006516	SLC2A1	solute carrier family 2, facilitated glucose transporter member 1	3.56127e-06	4.74086	down	chr1	-	43391045	43424847
NR_037884	LOC100507053	0.0427145	2.36869	up	RefSeq	4827	chr4	+	100010007	100222513	natural antisense	NM_000667	ADH1A	alcohol dehydrogenase 1A	0.00292973	9.13483	up	chr4	-	100197522	100212185
NR_038982	LOC100507346	9.57102e-06	3.52986	down	RefSeq	1957	chr9	+	98225890	98232301	natural antisense	NM_000264	PTCH1	protein patched homolog 1 isoform L	1.77901e-05	5.79927	down	chr9	-	98205263	98270831
NR_038982	LOC100507346	9.57102e-06	3.52986	down	RefSeq	1957	chr9	+	98225890	98232301	natural antisense	NM_001083602	PTCH1	protein patched homolog 1 isoform M	0.000722871	6.11793	down	chr9	-	98205263	98279247
NR_038982	LOC100507346	9.57102e-06	3.52986	down	RefSeq	1957	chr9	+	98225890	98232301	natural antisense	NM_001083603	PTCH1	protein patched homolog 1 isoform L'	2.68617e-06	4.66844	down	chr9	-	98205263	98279247
NR_038982	LOC100507346	9.57102e-06	3.52986	down	RefSeq	1957	chr9	+	98225890	98232301	natural antisense	NM_001083607	PTCH1	protein patched homolog 1 isoform S	1.71563e-05	3.15252	down	chr9	-	98205263	98269481
NR_040599	LOC100505812	1.73885e-05	2.98743	up	RefSeq	1984	chr19	+	48758931	48761450	natural antisense	NM_001184904	CARD8	caspase recruitment domain-containing protein 8 isoform d	1.82842e-06	2.08976	up	chr19	-	48741517	48759203
NR_045216	LOC100652770	0.0053208	2.48949	down	RefSeq	2000	chr18	-	29122108	29136874	natural antisense	NM_001943	DSG2	desmoglein-2 preproprotein	0.000867084	3.3918	down	chr18	+	29078026	29128814
NR_046702	PRICKLE2-AS3	0.000605473	4.4614	down	RefSeq	3101	chr3	+	64173219	64187236	natural antisense	NM_198859	PRICKLE2	prickle-like protein 2	6.83478e-07	2.65594	down	chr3	-	64079525	64211131
NR_052015	RUSC2	0.000314766	4.11332	down	RefSeq	4997	chr9	+	35490006	35561895	natural antisense	NM_001099951	FAM166B	protein FAM166B isoform 2	0.0471099	4.82075	up	chr9	-	35561826	35563896
TCONS_00025171	XLOC_012193	0.0132871	5.92923	up	LincRNAs identified by Cabili et al	1164	chr17	+	37916401	37920067	natural antisense	NM_183230	IKZF3	zinc finger protein Aiolos isoform 4	9.6887e-08	9.20535	up	chr17	-	37913967	38020441
TCONS_00025171	XLOC_012193	0.0132871	5.92923	up	LincRNAs identified by Cabili et al	1164	chr17	+	37916401	37920067	natural antisense	NM_183232	IKZF3	zinc finger protein Aiolos isoform 6	1.97307e-06	8.77556	up	chr17	-	37913967	38020441
uc001mrp.3	BDNF-AS1	0.00394888	2.1628	down	UCSC_knowngene	1539	chr11	+	27528398	27699350	natural antisense	NM_170734	BDNF	brain-derived neurotrophic factor isoform c preproprotein	0.0214559	6.39774	up	chr11	-	27676441	27721214
uc002vyh.3	AF055024	9.53486e-08	6.7832	down	UCSC_knowngene	1834	chr2	-	239359012	239360880	natural antisense	NM_001040445	ASB1	ankyrin repeat and SOCS box protein 1	3.36786e-06	2.23454	down	chr2	+	239335625	239360891
uc002ypm.3	BC034802	0.00617067	3.45941	down	UCSC_knowngene	579	chr21	-	33678774	33681045	natural antisense	NM_206898	MRAP	melanocortin-2 receptor accessory protein isoform beta	0.0119806	2.22215	down	chr21	+	33664123	33687094
uc003ooz.1	AX747174	0.038969	2.32411	down	UCSC_knowngene	3053	chr6	-	39851291	39854344	natural antisense	NM_015345	DAAM2	disheveled-associated activator of morphogenesis 2 isoform 2	0.0038937	3.20751	down	chr6	+	39760772	39872653
uc003pho.1	AK124950	1.20802e-05	2.86599	down	UCSC_knowngene	1862	chr6	-	74403625	74405743	natural antisense	NM_001159587	CD109	CD109 antigen isoform 2 precursor	0.000708108	11.0349	down	chr6	+	74405507	74538041
uc003pho.1	AK124950	1.20802e-05	2.86599	down	UCSC_knowngene	1862	chr6	-	74403625	74405743	natural antisense	NM_001159588	CD109	CD109 antigen isoform 3 precursor	6.26974e-05	12.2751	down	chr6	+	74405507	74538041
uc003pho.1	AK124950	1.20802e-05	2.86599	down	UCSC_knowngene	1862	chr6	-	74403625	74405743	natural antisense	NM_133493	CD109	CD109 antigen isoform 1 precursor	0.000167289	16.092	down	chr6	+	74405513	74538041
uc003wdj.1	LOC154761	2.55991e-05	3.40245	down	UCSC_knowngene	2405	chr7	-	143418750	143533810	natural antisense	NM_001130025	FAM115C	protein FAM115C isoform A	0.00436862	2.90036	down	chr7	+	143318044	143422176
uc003xcr.3	BC043400	0.000900414	3.09301	up	UCSC_knowngene	1943	chr8	-	22863895	22876848	natural antisense	NM_001160036	RHOBTB2	rho-related BTB domain-containing protein 2 isoform 1	0.0327259	2.34824	down	chr8	+	22844929	22877710
uc003xcr.3	BC043400	0.000900414	3.09301	up	UCSC_knowngene	1943	chr8	-	22863895	22876848	natural antisense	NM_001160037	RHOBTB2	rho-related BTB domain-containing protein 2 isoform 2	0.0110982	2.74217	down	chr8	+	22853360	22877710
uc003xcr.3	BC043400	0.000900414	3.09301	up	UCSC_knowngene	1943	chr8	-	22863895	22876848	natural antisense	NM_015178	RHOBTB2	rho-related BTB domain-containing protein 2 isoform 3	0.00730021	2.09193	down	chr8	+	22857091	22877710
uc003xia.1	AK057935	3.18717e-06	4.69217	down	UCSC_knowngene	902	chr8	-	30239641	30242917	natural antisense	NM_001008712	RBPMS	RNA-binding protein with multiple splicing isoform C	0.000753563	2.33578	down	chr8	+	30241943	30405029
uc003xia.1	AK057935	3.18717e-06	4.69217	down	UCSC_knowngene	902	chr8	-	30239641	30242917	natural antisense	NM_006867	RBPMS	RNA-binding protein with multiple splicing isoform A	4.681e-10	2.89736	down	chr8	+	30241943	30429734
uc003zhi.2	FLJ35024	9.09077e-08	6.75708	down	UCSC_knowngene	3764	chr9	-	2422701	2622373	natural antisense	NM_001018056	VLDLR	very low-density lipoprotein receptor isoform b precursor	1.46141e-08	5.42209	down	chr9	+	2621792	2654485
uc003zhi.2	FLJ35024	9.09077e-08	6.75708	down	UCSC_knowngene	3764	chr9	-	2422701	2622373	natural antisense	NM_003383	VLDLR	very low-density lipoprotein receptor isoform a precursor	5.58274e-05	6.55263	down	chr9	+	2621792	2654485
uc004brf.1	AX747547	3.15836e-06	6.73521	down	UCSC_knowngene	2140	chr9	-	130254830	130256970	natural antisense	NM_001190723	LRSAM1	E3 ubiquitin-protein ligase LRSAM1 isoform 2	0.00174117	3.46729	down	chr9	+	130213764	130265780
uc010hno.3	LOC100506994	0.000547296	4.14809	down	UCSC_knowngene	2665	chr3	-	62247493	62304622	natural antisense	NM_002841	PTPRG	receptor-type tyrosine-protein phosphatase gamma	4.13562e-07	3.4521	down	chr3	+	61547242	62280573
